# Supplementary material for: iMyoblasts for ex vivo and in vivo investigations of human myogenesis and disease modeling
Source: eLife. 2022 Jan 25;11:e70341. doi: 10.7554/eLife.70341 (PMC8789283; doi:10.7554/eLife.70341)
Supplement: Figure 1—figure supplement 1—source data 1. [file elife-70341-fig1-figsupp1-data1.xlsx]

## Sheet: Figure 1-figure supplement 1
qPCR for Figure 1-figure supplement 1B
Delta Ct Values were calculated for each gene normalized to RPL13A and then Fold change relative to RPL13A is shown
PAX3						PAX7						MYOD1						MYH8
Cell Line	iPSC	S1	S2	S3		Cell Line	ESC	S1	S2	S3		Cell Line	ESC	S1	S2	S3		Cell Line	ESC	S1	S2	S3
15AM12	0.00843147	1.30134	0.952638	0.598739		Genea 002	0.00303788	0.00592853	0.00185529	0.0388756		Genea 002	1.94882e-05	0.00010527	0.194615	0.0595214		Genea 002	1.27257e-05	6.2458e-05	2.62234	7.06639
15VM2	0.00138107	0.334482	0.220676	0.0973956		Genea 015	0.006543	0.0235981	0.00354422	0.0255248		Genea 015	1.09828e-05	6.3141e-06	0.00548953	0.0120329		Genea 015	1.50383e-05	0.00171437	0.410057	1.92434
15VM9	0.00321715	0.493116	0.279322	0.262429		Genea 019	0.00166964	0.00588454	0.00079265	0.0266182		Genea 019	2.96833e-06	1.4231e-05	0.0840804	0.0405923		Genea 019	4.54559e-06	0.00035762	1.03422	3.52723
15VF20	0.00171212	0.476319		0.0818996		Genea 049	0.00422106	0.0301787	0.00702288	0.0114158		Genea 049	7.13564e-06	6.3874e-06	0.0162376	0.0138839		Genea 049	1.21661e-05	0.00054496	0.648372	0.267536
17AF15	8.3956e-05	0.673617	0.244855	0.0967228		Genea 050	0.0051988	0.769532	0.002469	0.0792622		Genea 050	5.14829e-06	0.00142434	0.0282877	0.0408857		Genea 050	2.10601e-05	0.206082	0.0752057	1.62545
17AM7	3.999e-05	0.737135	0.243164	0.0890031		Genea 096	0.00344198	0.00760909	0.00698335	0.0510535		Genea 096	5.85253e-06	4.5978e-06	0.0526573	0.103852		Genea 096	9.94492e-06	0.00288452	0.857767	3.52703
17UM10	4.822e-05	0.496546	0.204476	0.164938
30AM4	6.407e-05	0.673617	0.285191	0.429283		Cell Line	iPSC	S1	S2	S3		Cell Line	iPSC	S1	S2	S3		Cell Line	iPSC	S1	S2	S3
30AM7	2.3614e-05	0.281265	0.29937	0.214641		15AM8	0.00171212	0.0108964	0.00670754	0.00259509		17AF15	2.23402e-05	0.0231957	1.27456	0.712025		15AM8	0.00018631	0.00029643	0.236514	0.870551
3WM32		0.547147	0.336808	0.373712		15AM12	0.00596195	0.01418	0.00344806	0.00421574		17AM7	4.14003e-05	0.0289559	1.10957	0.68302		15AM12	0.00189972	0.00054934	15.7797	136.239
8801-20	4.0548e-05	0.432269	0.133972	0.0633725		17AF15	0.00020961	0.00968522	0.00321715	0.0203335		30AM4	2.54849e-05	0.0124303	0.779165	1.25701		15AF8	0.00012292	0.00019422	0.00107608	0.650671
FP3	5.4251e-05	0.392292	0.258816	0.150726		17AM7	0.00018375	0.00754638	0.00068103	0.00024927		30AM7	1.49448e-05	0.00224355	0.389582	0.183011		17AF15	0.00019023	0.00034288	5.38893	13.5479
WWS-4	0.00090487	0.403321	0.346277	0.156041		15VM2	0.00232267	0.0129581	0.00247218	0.026278		15VM2	1.14048e-05	5.2767e-05	0.0583146	0.0908733		17AM7	0.00047823	0.00054934	1.70527	4.46915
RB25199 c49	0.0017725	1.42405	1.94531	1.33793		15VM9	0.00560139	0.00579892	0.00754638	0.00909948		15VM9	2.53088e-05	0.00034288	0.174343	0.133046		30AM4	8.5128e-05	7.1584e-05	6.86852	6.23332
						15VF20	0.00227487	0.0133224		0.00356965		15FV10	2.36455e-06	2.7162e-06	0.00903663	0.0415214		30AM7	9.1238e-05	0.00015344	0.320856	0.586417
						15FV10	0.00051256	0.0067542	0.0065695	0.0275845		17UM10	2.44467e-05	0.0144779	0.926588	0.907519		15VM2	0.0005055	0.00107608	0.570382	7.06162
												8801-20	1.72864e-05	0.0160643	0.628507	0.668964		15VM9	0.00109869	0.00025628	3.29436	23.4254
												FP3	3.45729e-05	0.00319493	0.309927	0.384219		15VF20	0.00131566	0.00090487		49.5221
												WWS-4	4.19782e-05	0.00015451	0.578344	0.858565		15FV10	4.664e-06	9.9975e-06	0.153893	1.26576
												RB25199 c49	8.76387e-06	0.157127	8.22491	7.83536		17UM10	9.5774e-05	0.00013451	1.23971	1.42405
																		30WM32		0.00010627	0.289172	0.108067
																		8801-20	6.77227e-05	1.7528e-05	0.392292	0.482968
																		FP3	0.000106268	0.00028634	0.262429	1.81504
																		WWS-4	0.000261663	1.248e-05	0.228458	4.31691
																		RB25199 c49	1.16444e-05	0.00010408	9.12611	0.768438
