# Supplementary material for: iMyoblasts for ex vivo and in vivo investigations of human myogenesis and disease modeling
Source: eLife. 2022 Jan 25;11:e70341. doi: 10.7554/eLife.70341 (PMC8789283; doi:10.7554/eLife.70341)
Supplement: Figure 1—figure supplement 2—source data 1. [file elife-70341-fig1-figsupp2-data1.xlsx]

## Sheet: Figure 1-figure supplement 2
Figure 1-figure supplement 2
Fusion index
17AM	42.94	40.87
% Nuclei in MF20+ cells
17AM	40.72	49.66	37.89	34.01
