# Supplementary material for: iMyoblasts for ex vivo and in vivo investigations of human myogenesis and disease modeling
Source: eLife. 2022 Jan 25;11:e70341. doi: 10.7554/eLife.70341 (PMC8789283; doi:10.7554/eLife.70341)
Supplement: Figure 1—source data 1. [file elife-70341-fig1-data1.xlsx]

## Sheet: Figure 1
Figure 1A
% of cells MYOD+ N=individual images
S2 cells	91.95	94.28	86.16	90.31
iMyoblasts	70.6365	64.6778	98.1132	93.2692
Fusion index N=individual images
S3 cells	5.84	5.5	3.74
iMyotubes	32.09	25.88	16.8	19.68	36.97	26.28
% Nuclei in MF20+ cells N=individual images
S3 cells	85.6	88.53	81.78
iMyotubes	54.01	47.12	31.15	38.96	53.87
qPCR for Figure 1
Delta Ct Values were calculated for each gene normalized to RPL13A and then Fold change relative to RPL13A is shown
17UM cell line was used for Figure 2\B and C
Figure 1B
gene	17UM iMyoblasts			17Ubic bMyoblasts
PAX3	0.58	0.68	0.57	0.09	0.13	0.14
PAX7	0.00068	0.00092	0.00066	0.03551	0.07193	0.10135
MYOD1	2.99	3.51	3.73	1.75	2.16	2.24
Figure 1C
PAX3			MYOD1			CKM				MYH8
P6	0.732043	0.926588	P6	2.25012	2.26577	P5	6.9644	7.94474	9.00047	P5	5.93809	6.27667	6.9644
P9	0.876606	0.817902	P9	1.3566	1.15669	P9	14.8254	13.0864	9.71356	P9	7.1602	7.4127	5.20537
P12	0.752623	0.80107	P12	1.07923	1.11729	P11	8.1681	7.51618	8.33973	P11	1.38511	1.23971	1.02811
P15	0.325335	0.371131	P15	0.316439	0.373712	P15	0.395021	0.31864	0.363493	P15	0.0162885	0.0172173	0.0168629
