# Supplementary material for: iMyoblasts for ex vivo and in vivo investigations of human myogenesis and disease modeling
Source: eLife. 2022 Jan 25;11:e70341. doi: 10.7554/eLife.70341 (PMC8789283; doi:10.7554/eLife.70341)
Supplement: Figure 4—figure supplement 1—source data 1. [file elife-70341-fig4-figsupp1-data1.xlsx]

## Sheet: Figure 4-figure supplement 1
qPCR for Figure 4-figure supplement 1A
Delta Ct Values were calculated for each gene normalized to RPL13A and then Fold change relative to RPL13A is shown
MBD3L2
	17Ubic Opti	17Ubic N2	17UM10 Opti	17UM10 N2	17Abic Opti	17Abic N2	17AM7 Opti	17AM7 N2
D0DM	2.28401e-06	2.284e-06	3.0771e-06	3.0771e-06	0.00081552	0.00081552	0.00086801	0.00086801
D2DM	0.00113744	2.8315e-06	2.9723e-06	2.237e-06	0.00089862	0.00011155	0.307786	0.615572
D4DM	0.00289946	1.972e-05	4.0603e-06	8.3956e-05	2.25012	2.46229	12.042	14.723
D6DM	0.0170983	0.0126914	3.9767e-06	4.8285e-06	6.49802	9.38268	13.4543	13.8326
MYH8
	17Ubic Opti	17Ubic N2	17UM10 Opti	17UM10 N2	17Abic Opti	17Abic N2	17AM7 Opti	17AM7 N2
D0DM	0.00361948	0.00361948	5.7743e-05	5.7743e-05	9.8467e-05	9.8467e-05	0.00012725	0.00012725
D2DM	4.08405	5.1337	0.210224	0.260616	0.895025	1.07923	0.0406669	0.0432847
D4DM	8.9383	14.5203	0.255253	0.184284	6.54322	6.45313	0.20166	0.126745
D6DM	25.8125	12.4666	0.196146	0.0947323	5.54044	4.99332	0.779165	0.260616
MYH1
	17Ubic Opti	17Ubic N2	17UM10 Opti	17UM10 N2	17Abic Opti	17Abic N2	17AM7 Opti	17AM7 N2
D0DM	0.00025275	0.00025275	1.6129e-05	1.6129e-05	0.00439476	0.00439476	8.0644e-06	8.0644e-06
D2DM	0.0067542	0.00988872	3.073e-05	1.7048e-05	0.0109722	0.0133224	7.0111e-05	1.9584e-05
D4DM	0.0674518	0.0674518	6.6329e-05	4.227e-05	0.309927	0.116629	7.3597e-05	9.7787e-05
D6DM	0.144586	0.0774817	3.6798e-05	4.8285e-06	0.239816	0.166086	0.00044006	0.00025275
CKM	17Ubic Opti	17Ubic N2	17UM10 Opti	17UM10 N2	17Abic Opti	17Abic N2	17AM7 Opti	17AM7 N2
D0DM	0.00192624	0.00192624	6.8285e-06	6.8285e-06	5.3876e-05	5.3876e-05	0.00059287	0.00059287
D2DM	3.11666	5.31474	0.198884	0.429283	0.726986	0.920188	0.339151	0.50698
D4DM	6.9163	13.0864	1.16473	1.68179	4.92458	6.58873	2.46229	1.85318
D6DM	13.5479	12.7286	0.678302	0.779165	6.27667	12.295	3.605	3.22657
TRIM43	17Ubic Opti	17Ubic N2	17UM10 Opti	17UM10 N2	17Abic Opti	17Abic N2	17AM7 Opti	17AM7 N2
D0DM	3.4097e-05	3.4097e-05	2.3128e-05	2.3128e-05	0.00433426	0.00433426	0.00157547	0.00157547
D2DM	0.00021851	3.4813e-05	4.14e-05	3.4813e-05	0.00219738	0.00193963	0.260616	0.456916
D4DM	0.00293994	0.00011791	0.00017144	0.0001139	0.812252	0.933033	4.25748	4.72397
D6DM	0.00600342	0.00647906	6.4964e-05	0.00016675	2.9897	4.28709	4.89056	6.27667
LEUTX	17Ubic Opti	17Ubic N2	17UM10 Opti	17UM10 N2	17Abic Opti	17Abic N2	17AM7 Opti	17AM7 N2
D0DM	0.00010336	0.00010336	0.00013358	0.00013358	0.00035252	0.00035252	0.00060114	0.00060114
D2DM	0.00014022	0.0001255	0.00016908	0.00016908	0.00012725	0.00037782	0.103665	0.204476
D4DM	0.00017263	0.00023258	0.0002231	0.00023097	0.426317	0.397768	1.79005	2.71321
D6DM	0.00264962	0.00212253	0.00024584	0.00024245	1.20581	1.70527		0.655197
ZSCAN4	17Ubic Opti	17Ubic N2	17UM10 Opti	17UM10 N2	17Abic Opti	17Abic N2	17AM7 Opti	17AM7 N2
D0DM	0.00015996	0.00015996	3.1376e-05	3.1376e-05	0.00139067	0.00139067	0.00014719	0.00014719
D2DM	0.00088013	0.00122755	5.8144e-05	3.9714e-05	0.0014199	0.00114535		0.231647
D4DM	0.00120229	0.00328475	0.00063103	0.00057666	0.266093	0.314253	1.50525	0.882703
D6DM	0.0043644	0.00608722	0.00022938	0.00021851	0.732043	1.36604		2.39496
qPCR for Figure 4-figure supplement 1B
Delta Ct Values were calculated for each gene normalized to RPL13A and then Fold change relative to RPL13A is shown
PAX3					MYOD1					MYOG
17UM	0.28	0.37	0.36		17UM	3.49	4.59	4.68		17UM	15.45	16.75	19.58
17AM	1.06	0.93	0.96		17AM	3.77	3.21	3.13		17AM	20.69	15.45	17.32
17AF15	0.34	0.32	0.32		17AF15	5.27	4.92	4.99		17AF15	26.6	28.1	23.81
MYH8					CKM
17UM	0.90125	1.06437	1.43396		17UM	5.38893	6.82108	7.6211
17AM	0.673617	0.473029	0.650671		17AM	4.62675	3.4822	4.19887
17AF15	3.22657	2.96905	3.20428		17AF15	7.3615	7.21	8.81524
54574/5F27	1.42405	2.05623	2.34567		54574/5F27	12.2101	12.4666	11.2356
54574/5F15	8.22491	9.91766	8.69388		54574/5F15	29.0406	34.5353	27.6652
54585F	0.160428	0.376312	0.403321		54585F	1.16473	1.68179	1.93187
MBD3L2					TRIM43					LEUTX					ZSCAN4
17UM	6.146e-05	0.00024584	2.9314e-06		17UM	2.1729e-05	2.7504e-05	8.7522e-05		17UM	7.9534e-06	5.9859e-06	5.3876e-05		17UM	0.00159746	0.00151129	0.00240458
17AM	46.2057	39.6706	36.2523		17AM	29.8571	22.4711	22.3159		17AM	10.7034	8.75435	8.39773		17AM	8.45614	6.6807	6.72717
17AF15	13.5479	11.7942	13.737		17AF15	6.27667	5.54044	6.72717		17AF15	4.16986	3.31728	3.91768		17AF15	2.71321	2.2974	3.13834
54574/5F27	17.1484	18.8959	15.455		54574/5F27	15.8895	14.723	12.6407		54574/5F27	7.31065	8.33973	6.82108		54574/5F27	4.82323	5.31474	4.72397
54574/5F15	4.95883	4.89056	3.86375		54574/5F15	3.07375	3.5801	2.75108		54574/5F15	2.47942	2.58471	2.36199		54574/5F15	1.54756	1.64718	1.48452
54585F	8.05564	11.3137	12.9063		54585F	5.24157	7.4127	9.00047		54585F	2.53151	3.68075	3.75809		54585F	2.02792	2.9897	3.50642
