# Supplementary material for: iMyoblasts for ex vivo and in vivo investigations of human myogenesis and disease modeling
Source: eLife. 2022 Jan 25;11:e70341. doi: 10.7554/eLife.70341 (PMC8789283; doi:10.7554/eLife.70341)
Supplement: Figure 4—source data 1. [file elife-70341-fig4-data1.xlsx]

## Sheet: Figure 4
qPCR for Figure 4A
Delta Ct Values were calculated for each gene normalized to RPL13A and then Fold change relative to RPL13A is shown
CKM	17Ubic	17UM10	17Abic	17AM7	R7	15Vbic	15Abic	15AM		MYH1	17Ubic	17UM10	17Abic	17AM7	R7	15Vbic	15Abic	15AM		MYH8	17Ubic	17UM10	17Abic	17AM7	R7	15Vbic	15Abic	15AM
D0DM	0.00192624	6.8285e-06	5.38759e-05	0.000592869	0.00144973	0.00157547	0.000179965	0.000117912		D0DM	0.00025275	1.61288e-05	0.00439476	8.06441e-06	5.81444e-05	3.07298e-05	4.02682e-05	3.86795e-06		D0DM	0.00361948	5.77428e-05	9.8467e-05	0.000127254	0.00458139	0.00116941	0.000362433	0.000162193
D2DM	5.31474	0.429283	0.920188	0.50698	1.24833	3.03143	0.82932	0.312083		D2DM	0.00988872	1.70484e-05	0.0133224	1.95835e-05	0.000383098	0.00257716	0.00484261	0.000667012		D2DM	5.1337	0.260616	1.07923	0.0432847	3.05252	3.81055	0.721965	0.258816
D4DM	13.0864	1.68179	6.58873	1.85318		5.9794	5.61778	2.12874		D4DM	0.0674518	4.22702e-05	0.116629	9.77869e-05		0.0289559	0.0463914	0.000249271		D4DM	14.5203	0.184284	6.45313	0.126745		6.58873	4.69134	1.18099
D6DM	12.7286	0.779165	12.295	3.22657	25.9921	8.22491	6.06287	1.10191		D6DM	0.0774817	4.82848e-06	0.166086	0.00025275	0.000165601	0.22688	0.140632	0.000404941		D6DM	12.4666	0.0947323	4.99332	0.260616	24.761	14.723	5.57897	0.550953
NanoString Normalized counts for Figure 4B
Raw counts for each sample were normalized to RPL13A
MYOD1		17U			17A				PAX3		17U			17A
iMyocytes	N2	923.4	776.01	878.29	1182.61	1087.27	1113.25		iMyocytes	N2	95.23	80.59	74.66	57.69	123.14	120.61
	S3	2201.2	1982.2	1922.26	1058.82	922.02	922.18			S3	97	115.42	118.93	96.74	100.04	102.34
	S3+SB+P+C	1131.65	1331.27	1356.73	1163.73	949.56	1198			S3+SB+P+C	122.25	144.14	132.71	111.59	118.7	159.6
	S3+SB+De+Da+F	2201.2	1982.2	1922.26	1229.4	1314.24	1234.89			S3+SB+De+Da+F	366.87	342.11	298.28	432.66	447.71	432.66
iMyotubes	N2	730.97	776.23	795.01	741.71	712.35	740.11		iMyotubes	N2	36.29	45.43	51.25	250.65	206.14	224.27
	N2+SB	1082.64	1047.1	832.31	1055.88	1073.37	972.61			N2+SB	55.86	32.94	52.52	166.47	194.33	192.2
	N2+SB+P+C	331.54	366.49	310.26	392.01	440.48	474.46			N2+SB+P+C	54.34	63.44	54.4	173.95	142.39	158.52
	N2+SB+De+Da+F	656.69	811.84	700.89	651.31	548.5	572.15			N2+SB+De+Da+F	21.01	30.17	35.28	165.14	154.03	164.61
bMyotubes	N2	1657.48	1499.26	1600.59	600.78	612.42	703.32		bMyotubes	N2	41.59	37.6	43.87	51.87	43.1	36.25
	N2+SB	2074.34	2020.87	2176.11	1478.81	1528.83	1409.15			N2+SB	38.04	37.05	38.52	37.27	35.2	44.92
	N2+SB+P+C	951.06	896.03	963.56	597.62	669.48	681.62			N2+SB+P+C	26.94	16.14	23.27	18.56	25.59	26.27
	N2+SB+De+Da+F	1528.46	1427.26	1414	1912.57	1686.83	1756.52			N2+SB+De+Da+F	60.57	47.82	50.89	115.79	73.57	83.97
MYH1		17U			17A				MYH7		17U			17A
iMyocytes	N2	15.15	11.63	13.48	14.42	27.68	34.46		iMyocytes	N2	1578.44	1328.52	1651.85	3187.29	3082.34	2978.87
	S3	18.93	17.95	23.51	16.12	16.67	15.92			S3	3812.64	3704.97	3718.52	3310.82	2789.39	2895.04
	S3+SB+P+C	97.8	76.07	96.8	173.36	222.08	180.76			S3+SB+P+C	5515.04	5971.71	5707.96	5097.31	5050.3	5530.4
	S3+SB+De+Da+F	25.07	36.22	24.86	36.93	40.92	36.06			S3+SB+De+Da+F	7970.81	7411.63	7264.4	4553.52	5423.04	5552.52
iMyotubes	N2	7.78	3.13	3.66	18.76	11.74	9.61		iMyotubes	N2	44.07	50.13	62.84	250.65	227.01	206.12
	N2+SB	11.17	9.41	3.18	17.77	20.58	21.54			N2+SB	252.5	204.71	240.3	949.26	780.74	830.12
	N2+SB+P+C	14.65	13.69	21.25	20.17	19.96	18.46			N2+SB+P+C	297.35	281.14	272.01	1066.38	1232.95	1196.48
	N2+SB+De+Da+F	11.26	19.2	16.46	17.17	22.54	23.84			N2+SB+De+Da+F	361.74	482.72	442.17	1694.98	1731.91	1523.48
bMyotubes	N2	774.83	491.72	542.71	200.89	188.26	180.36		bMyotubes	N2	2415.37	1890.7	2094.33	120.72	129.29	124.17
	N2+SB	787.9	670.26	748.01	560.1	534.54	543.2			N2+SB	3152.94	2911.18	3622.47	1553.36	1482.63	1657.04
	N2+SB+P+C	447.04	533.93	425.19	449.17	443.48	564.79			N2+SB+P+C	676.51	780.14	622.45	706.78	703.59	754.89
	N2+SB+De+Da+F	6.23	8.89	4.9	14.47	13.04	21.2			N2+SB+De+Da+F	6.23	4.23	3.77	29.61	17.22	47.5
MYH8		17U			17A				CKM		17U			17A
iMyocytes	N2	21655.2	21302.1	21860.8	17191.2	18256.3	16393.4		iMyocytes	N2	13153.4	12286.6	13544.5	18229.6	18444.4	16985.9
	S3	37427.3	37888.4	35715.2	22030.9	19842.5	20738.3			S3	38395	36892	35039	27448.6	25084.5	23083
	S3+SB+P+C	81330.3	86122.3	82036.3	99036.9	96104.9	96451.3			S3+SB+P+C	70267	79163.7	76578.1	89539.7	82780.4	90394
	S3+SB+De+Da+F	118915	119224	96699.2	59675.9	75941.8	80057.8			S3+SB+De+Da+F	171252	163843	145903	134442	154019	137909
iMyotubes	N2	1862.85	1919.03	2080.57	815.03	919.8	900.3		iMyotubes	N2	4685.64	4889.23	4693.18	3468.13	3555.25	3511.5
	N2+SB	9311.35	6440.25	7939.53	10174.4	7905.68	7752.74			N2+SB	8172.85	6442.6	7199.52	16001	13458.9	13764
	N2+SB+P+C	7405.58	7240.73	6351.4	22298.1	22567.7	23423.5			N2+SB+P+C	4270.92	4551.18	3783.47	14228.4	13778.7	14545.5
	N2+SB+De+Da+F	30141.6	36149	34481.4	38688.7	42093	43585.9			N2+SB+De+Da+F	22383.7	24179.8	21831.7	45172.7	35161.6	36203.5
bMyotubes	N2	26193.2	17699.9	19737.5	2037.17	2143.47	2148.02		bMyotubes	N2	18933.2	13722.8	15009.2	560.22	512.62	619.94
	N2+SB	33438	32885.2	33245.8	19622.5	18450.4	19112.5			N2+SB	49122.6	46404.9	48650.9	25716	26214.4	23369
	N2+SB+P+C	13193.1	15156.4	11912.8	11470.6	10450.9	12357.6			N2+SB+P+C	9600.19	11270.2	9108.35	13457.7	12191.3	12555.3
	N2+SB+De+Da+F	16.92	15.23	12.06	273.69	221.22	355.38			N2+SB+De+Da+F	12.47	10.58	9.8	442.12	303.66	508.04
