# Supplementary material for: iMyoblasts for ex vivo and in vivo investigations of human myogenesis and disease modeling
Source: eLife. 2022 Jan 25;11:e70341. doi: 10.7554/eLife.70341 (PMC8789283; doi:10.7554/eLife.70341)
Supplement: Figure 5—figure supplement 1—source data 1. [file elife-70341-fig5-figsupp1-data1.xlsx]

## Sheet: Figure 5-figure supplement 1
NanoString Normalized counts for Figure 5-figure supplement 1B
Raw counts for each sample were normalized to RPL13A
	17AM iMyotubes Post	17AM iMyotubes Post	17AM iMyotubes Post	17AM iMyotubes Pre	17AM iMyotubes Pre	17AM iMyotubes Pre	17AM iMyotubes	17AM iMyotubes	17AM iMyotubes	17AM N2	17AM N2	17AM N2
CKM	6305.17	5363.91	5393.93	5915.89	6598.55	6354.91	5126.8	5895.35	4065.73	6771.64	7673.57	7235.7
LEUTX	3025.72	3768	3301.84	2084.17	2173.49	2853.06	5142.06	4965.51	4630.36	4740.25	4942.59	5473.48
MBD3L2	4389	4705.13	4525.1	2918.59	3057.15	3067.2	4923.39	5582.1	4068.79	7262.97	7292.56	8594.11
MYH3	44673.9	36415.2	33618.4	44641.8	43113.2	43256.8	29304.7	38469.6	27416.6	40813.9	49910.2	41135.5
MYH8	1771.32	1353.33	1367.44	2290.88	2600.68	2551.36	1312	1701.92	1141.51	1610.1	2078.57	1894.08
TRIM43	3473.52	3414.23	3654.77	2534.57	2817.65	2779.82	4058.05	4557.75	3485.79	6196.24	6183.56	6794.8
Zscan4	1590.49	1690.85	1665.56	1217.5	1242.53	1346.13	1576.43	2006.78	1584.63	2833.94	2802.29	3009.38
RPL13A	3616.48	3616.48	3616.48	3616.48	3616.48	3616.48	3616.48	3616.48	3616.48	3616.48	3616.48	3616.48
