# Supplementary material for: iMyoblasts for ex vivo and in vivo investigations of human myogenesis and disease modeling
Source: eLife. 2022 Jan 25;11:e70341. doi: 10.7554/eLife.70341 (PMC8789283; doi:10.7554/eLife.70341)
Supplement: Figure 5—source data 1. [file elife-70341-fig5-data1.xlsx]

## Sheet: Figure 5
qPCR for Figure 5A
Delta Ct Values were calculated for each gene normalized to RPL13A and then Fold change relative to RPL13A is shown
MBD3L2	17Ubic	17UM10	17Abic	17AM7	15Vbic	15Abic	15AM		TRIM43	17Ubic	17UM10	17Abic	17AM7	15Vbic	15Abic	15AM		LEUTX	17Ubic	17UM10	17Abic	17AM7	15Vbic	15Abic	15AM		ZSCAN4	17Ubic	17UM10	17Abic	17AM7	15Vbic	15Abic	15AM
D0DM	2.28401e-06	3.07709e-06	0.000815516	0.00086801	1.95835e-05	1.2394e-05	2.55189e-06		D0DM	3.40969e-05	2.3128e-05	0.00433426	0.00157547	6.54159e-05	7.4624e-05	0.000113109		D0DM	0.000103362	0.000133581	0.000352522	0.000601145	0.000471649	0.000375214	0.000557014		D0DM	0.00015996	3.13755e-05	0.00139067	0.000147193	0.000110016	8.93607e-05	9.44559e-05
D2DM	2.8315e-06	2.23701e-06	0.000111552	0.615572	0.000263483	1.3487e-06	0.0127797		D2DM	3.48133e-05	3.48133e-05	0.00193963	0.456916	4.31584e-05	0.000215504	0.0110485		D2DM	0.000125502	0.000169081	0.000377823	0.204476	0.000288328	0.000478233	0.00567958		D2DM	0.00122755	3.97138e-05	0.00114535	0.231647	0.000709948	0.000306888	0.0102374
D4DM	1.97197e-05	8.39564e-05	2.46229	14.723	0.0830429	2.00218e-06	2.53151		D4DM	0.000117912	0.000113896	0.933033	4.72397	5.85488e-05	0.034674	1.67018		D4DM	0.000232578	0.000230971	0.397768	2.71321	0.000512557	0.0392817	2.12874		D4DM	0.00328475	0.000576657	0.314253	0.882703	0.00352051	0.0197774	1.07923
D6DM	0.0126914	4.82848e-06	9.38268	13.8326	0.441351	0.00274306	3.91768		D6DM	0.00647906	0.000166753	4.28709	6.27667	0.00909948	0.238159	2.8481		D6DM	0.00212253	0.000242454	1.70527	0.655197	0.00352051	0.19751	2.9897		D6DM	0.00608722	0.000218512	1.36604	2.39496	0.00975258	0.114229	1.86607
Figure 5B: DUX4-GFP+/1000 nuclei N=individual images
17AM	23.67		36.76	42.55	24.54	28.25	33.9	53.19	58.25	27.52	63.69
17UM	0	0	0	0	0
NanoString Normalized counts for Figure 5C
Raw counts for each sample were normalized to RPL13A
MBD3L2		17U			17A				TRIM43		17U			17A
iMyocytes	N2	6.49	5.82	4.15	548.04	427.65	458.51		iMyocytes	N2	9.38	13.29	15.55	317.29	249.15	315.88
	S3	9.46	14.11	8.3	295.61	450.17	321.8			S3	11.83	12.82	15.21	188.11	253.43	153.51
	S3+SB+P+C	13.97	24.02	26.54	408.5	432.66	559.58			S3+SB+P+C	15.72	12.01	24.98	245.1	348.43	373.05
	S3+SB+De+Da+F	34.18	28.17	24.86	89.7	170.9	267.41			S3+SB+De+Da+F	22.79	18.11	24.86	79.15	132.39	138.21
iMyotubes	N2	1	2.35	2.44	12090.7	12399.6	11323.8		iMyotubes	N2	6.05	3.13	4.27	9175.03	8394.29	7786.61
	N2+SB	3.35	2.35	1.59	6571.9	6585.4	5703.12			N2+SB	8.94	2.35	6.37	3507.14	3401.87	3045.42
	N2+SB+P+C	4.88	2.74	1.7	434.87	418.52	438.64			N2+SB+P+C	4.27	4.11	7.65	182.77	154.37	114
	N2+SB+De+Da+F	7.51	2.74	4.7	251.01	299.3	242.94			N2+SB+De+Da+F	15.01	2.74	10.19	73.98	87.66	80.6
bMyotubes	N2	4.62	78.1	26.52	1403.39	1918.92	1509.05		bMyotubes	N2	35.43	74.24	14.28	742.25	849.45	710.57
	N2+SB	25.81	43.79	23.31	16257.9	18150.2	14904.2			N2+SB	29.89	38.17	34.46	6688.91	6986.41	5990.12
	N2+SB+P+C	4.66	5.19	3.7	4042.01	4274.55	3737.14			N2+SB+P+C	6.73	6.34	5.82	1206.71	1476.02	1233.27
	N2+SB+De+Da+F	1	1.27	2.26	1.32	5.22	11.87			N2+SB+De+Da+F	4.45	5.92	5.28	4.61	7.3	8.48
LEUTX		17U			17A				ZSCAN4		17U			17A
iMyocytes	N2	10.1	14.12	10.37	216.33	300.69	284.29		iMyocytes	N2	10.82	9.97	14.52	259.6	199.51	284.29
	S3	16.56	16.67	20.74	311.73	310.12	214.91			S3	17.74	11.54	16.59	257.99	251.76	209.23
	S3+SB+P+C	24.45	32.03	18.74	382.6	425.01	428.82			S3+SB+P+C	8.73	28.03	34.35	278.98	313.97	390.36
	S3+SB+De+Da+F	34.18	30.19	39.36	84.42	142.01	168.26			S3+SB+De+Da+F	34.18	10.06	24.86	105.53	132.39	246.38
iMyotubes	N2	4.32	5.48	4.27	6218.42	6335.51	6303.19		iMyotubes	N2	2.59	3.92	6.1	3459.6	3683.1	3618.3
	N2+SB	8.94	2.35	7.96	3109.66	3136.67	2723.98			N2+SB	2.23	7.06	3.18	1486.09	1569.48	1284.11
	N2+SB+P+C	6.11	9.13	4.25	181.51	174.33	231.26			N2+SB+P+C	9.77	9.58	6.8	107.14	83.84	106.4
	N2+SB+De+Da+F	10.51	16.46	12.54	158.53	278.01	253.16			N2+SB+De+Da+F	11.26	8.23	11.76	97.76	86.41	85.14
bMyotubes	N2	13.86	34.71	25.5	580.03	666.86	593.65		bMyotubes	N2	29.27	44.35	14.28	378.2	412.82	376.13
	N2+SB	39.39	46.03	24.33	5918.27	6038.32	5080.91			N2+SB	19.02	39.29	29.39	3304.16	3060.95	2602.84
	N2+SB+P+C	4.66	6.92	5.29	1339.33	1454.7	1289.26			N2+SB+P+C	5.7	7.5	7.4	579.61	512.92	514.32
	N2+SB+De+Da+F	3.56	8.04	2.64	3.29	5.22	6.79			N2+SB+De+Da+F	2.67	1	1	1.32	4.17	7.63
