# Supplementary material for: iMyoblasts for ex vivo and in vivo investigations of human myogenesis and disease modeling
Source: eLife. 2022 Jan 25;11:e70341. doi: 10.7554/eLife.70341 (PMC8789283; doi:10.7554/eLife.70341)
Supplement: Figure 6—figure supplement 1—source data 1. [file elife-70341-fig6-figsupp1-data1.xlsx]

## Sheet: Figure 6-figure supplement 1
Figure 6-figure supplement 1A
Delta Ct Values were calculated for each gene normalized to RPL13A and then Fold change relative to RPL13A is shown
	17UM			17AM
iMyoblasts	1.079e-05	6.7813e-06	6.876e-06	0.00030057	0.00014719	0.00031992
iMyotubes	3.0771e-06	2.6603e-06	3.5347e-06	0.732043	0.251739	0.742262
Figure 6-figure supplement 1B
Delta Ct Values were calculated for each gene normalized to RPL13A and then Fold change relative to RPL13A is shown
17UM	2.31589e-06	1.37704e-06	6.92382e-06
15VM	4.1169e-06	3.2525e-06
17AM	0.00032891	0.00075565	0.00059287
15AM	0.00026902	0.00090487	0.00188659
Figure 6-figure supplement 1C
Delta Ct Values were calculated for each gene normalized to RPL13A and then Fold change relative to RPL13A is shown
	17UM			17AM
iPSC	2.31589e-06	1.377e-06	6.9238e-06	0.00032891	0.00075565	0.00059287
S1	4.38194e-06	2.2216e-06	3.2752e-06	0.00612956	0.0107464	0.00739108
S2	3.01377e-06	2.6236e-06	2.9517e-06	0.00266805	0.00407213	0.00439476
S3	2.77323e-06	2.6603e-06	1.8811e-06	0.00094986	0.00043401	0.00079322
