# Supplementary material for: iMyoblasts for ex vivo and in vivo investigations of human myogenesis and disease modeling
Source: eLife. 2022 Jan 25;11:e70341. doi: 10.7554/eLife.70341 (PMC8789283; doi:10.7554/eLife.70341)
Supplement: Figure 6—figure supplement 2—source data 1. [file elife-70341-fig6-figsupp2-data1.xlsx]

## Sheet: Figure 6-figure supplement 2
Figure S8B
% Methylation for each sequenced clone from the indicated cell lines
Cell Line
Genea 002	100	98	98	98	100	96	96	96	96	96	94	94	94	93	93	91	91
Genea 015	98	98	98	98	98	98	98	96	96	96	93	91	87	87	82	75	69
Genea 019	98	98	98	96	96	96	94	94	94	93	93	71	68	39
Genea 049	98	96	94	94	93	93	93	80	78	9	5	5	3.5	3.5
Genea 050	96	96	94	93	93	91	68	50	18	9	9	5	3.5	3.5	3.5	2
Genea 096	96	96	94	93	93	91	89	86	84	82	80	68	66	66	3.5
