# Supplementary material for: iMyoblasts for ex vivo and in vivo investigations of human myogenesis and disease modeling
Source: eLife. 2022 Jan 25;11:e70341. doi: 10.7554/eLife.70341 (PMC8789283; doi:10.7554/eLife.70341)
Supplement: Figure 6—source data 1. [file elife-70341-fig6-data1.xlsx]

## Sheet: new fig 6
Figure 6A
Delta Ct Values were calculated for each gene normalized to RPL13A and then Fold change relative to RPL13A is shown
MBD3L2						TRIM43						ZSCAN4
Cell Line	ESC	S1	S2	S3		Cell Line	iPSC	S1	S2	S3		Cell Line	iPSC	S1	S2	S3
Genea 002	1.86424e-05	5.7991e-05	2.88537e-06	2.90599e-06		15AM12	0.00010065	0.0016019	0.00030718	4.8954e-05		15AM12	4.21165e-05	0.00148874	0.00130109	0.00163898
Genea 015	3.80301e-05	4.132e-05	7.44458e-05	4.41939e-06		15AF8	0.00044895	0.0128768	0.00119497	0.00479827		15AF8	0.00250315			0.00074145
Genea 019	0.000227545	0.00028499	2.43474e-06	0.000494353		15VM2	7.3491e-05	0.00023591	5.5023e-06	1.2748e-05		15VM2	0.000119107	9.64e-05	4.8635e-05	1.8072e-05
Genea 049	0.0129687	0.0766828	0.0204409	0.0162857		15VM9	9.6304e-05	6.862e-06	5.8688e-06	1.1319e-05		15VM9	0.000237451	4.0118e-05	1.3389e-06	1.0189e-05
Genea 050	0.00617899	0.0191958	0.00268705	0.00319762		15VF20	0.00010398	6.7824e-06		1.7946e-05		15VF20	0.000269174	2.3764e-05		0.00039828
Genea 096	0.00283989	0.0002087	8.45046e-05	0.000695424		17AM7	0.0156366	0.14161	0.0743254	0.0065695		17AM7	0.00144973	0.0371627	0.032352	0.00232267
						17UM10	0.00268913	0.00017026	0.00036749	1.3101e-05		17UM10	0.000657829	0.00010627	5.9366e-05	7.998e-05
Cell Line	iPSC	S1	S2	S3
15AM8	0.00029643	0.00583925	0.00107608	0.00866851
15AM12	0.00011791	0.00121907	0.00074524	0.00032439
15AF8	0.00010124	0.0064343	0.00026902	0.00548611
17AF15	0.00060114	0.0791098	0.0332616	0.00942037
17AM7	8.2801e-05	0.0871715	0.0259162	0.120742
30AM4	0.00024414	0.00075043	0.0007401	0.00047823
30AM7	0.00045244	0.00379943	0.00600342	0.00349619
15VM2	4.9576e-05	0.00015886	2.0557e-05	1.6017e-05
15VM9	2.5662e-05	1.1405e-05	1.3394e-06	7.6825e-06
15VF20	2.7695e-05	3.9167e-05		4.822e-05
15FV10	1.1889e-05	6.8668e-05	4.3761e-05	0.00014822
17UM10	1.6376e-06	1.9448e-05	2.188e-05	1.4945e-05
30WM32		1.8146e-05	5.7344e-05	3.634e-06
Figure 6B
% Methylation for each sequenced clone from the indicated cell lines
17Ubic	73.21	73.21	73.21	73.21	71.42	71.42	69.64	60.71	60.71	51.78	57.14
15Vbic	100	98.2	82.14	80.36	75	53.57	51.78	51.78	46.43	21.4	17.86	14.28
17Abic	33.93	25	25	19.64	16.07	12.5	10.7	10.7	8.9	7.14	5.36	5.36	3.57	1.78
15Abic	37.5	26.78	28.57	17.86	14.28	14.28	10.71	10.71	10.71	10.71	8.9	7.1	7.1	7.1	5.35	5.35
30Abic	33.93	50	14.28	12.5	10.71	8.9	7.14	7.14	1.78
Figure 6C
% Methylation for each sequenced clone from the indicated cell lines
	17UM															17AM																	15AM
iPSC	100	100	100	100	100	100	100	98.2	98.2	96.4	94.6	94.6	94.6	94.6	92.86	7.1	5.36	5.36	5.36	5.36	5.36	3.57	3.57	3.57	1.78	1.78	1.78	1.78
S1	98.2	98.2	98.2	98.2	96.4	96.4	96.4	96.4	96.4	96.4						12.5	12.5	10.7	8.9	8.9	7.1	7.1	5.36	5.36	3.57	3.57	3.57	3.57	3.57	3.57	1.78
S2	98.2	98.2	98.2	98.2	98.2	98.2	96.4	96.4	94.6	94.6	94.6	94.6	94.6	94.6	91	14.28	12.5	10.7	10.7	8.9	7.1	7.1	7.1	7.1	5.36	5.36	3.57	1.78	1.78
S3	100	100	100	100	98.2	98.2	98.2	98.2	98.2	98.2	98.2	94.6				25	25	19.64	14.28	12.5	12.5	7.1	7.1	7.1	5.36	5.36	5.36	5.36	3.57	3.57
iMB	100	98.2	98.2	98.2	98.2	98.2	98.2	96.4	96.4	96.4	94.6	92.8	92.8	87.5		17.85	16.07	14.28	12.5	12.5	10.7	8.9	8.9	7.1	7.1	5.36	5.36	5.36	5.36	3.57	1.78		19.6	14.28	12.5	10.7	10.7	8.9	8.9	7.1	7.1	7.1	7.11	5.36	5.36	3.57	3.57
iMT	100	98.2	98.2	98.2	98.2	98.2	96.4	96.4	96.4	96.4	94.6	94.6	94.6	91.07		19.6	17.8	17.8	16.07	10.7	10.7	8.9	8.9	7.1	7.1	7.1	7.1	5.36	5.36	5.36	0		16.07	16.07	16.07	10.7	10.7	10.7	10.7	8.9	7.1	7.1	7.1	7.1	5.36	5.36	3.57	3.57	3.57
Figure 6D
% Methylation for the indicated cell lines. Each dot represents the average of at least 10 individual sequenced clones
CG1								CG2								CG3
	Ctrl			FSHD					Ctrl			FSHD					Ctrl			FSHD
bMB	0	0	0	7.14286	0	8.33333		bMB	8.33333	0	0	28.5714	0	7.14286		bMB	16.6667	16.6667	41.6667	42.8571	25	21.4286
iPSC	64.2857	58.3333		76.9231	76.4706	82.3529		iPSC	50	75		76.9231	82.3529	76.4706		iPSC	78.5714	75		92.3077	82.3529	94.1176
S1	30	36.3636	43.75	46.1538	37.5	50		S1	40	36.3636	43.75	23.0769	31.25	57.1429		S1	90	90.9091	81.25	76.9231	81.25	71.4286
S2	0	18.1818	20	6.66667	15.3846	50		S2	9.09091	9.09091	33.3333	6.66667	7.69231	37.5		S2	54.5455	36.3636	53.3333	53.3333	46.1538	75
S3	7.14286	7.14286	6.25	20	14.2857	21.4286		S3	21.4286	21.4286	18.75	0	28.5714	35.7143		S3	50	42.8571	50	30	42.8571	64.2857
iMB	0	22.2	21.4286	41.6667	7.14286	8.33333		iMB	8.33333	22.2	35.7143	25	7.14286	25		iMB	16.6667	33.3	71.4286	66.6667	35.7143	66.6667
iMT	0	40	0	11.7647	0	12.5		iMT	0	10	14.2857	17.6471	0	50		iMT	6.25	30	71.4286	35.2941	7.14286	62.5
[truncated: 8 more columns]
