# Supplementary material for: iMyoblasts for ex vivo and in vivo investigations of human myogenesis and disease modeling
Source: eLife. 2022 Jan 25;11:e70341. doi: 10.7554/eLife.70341 (PMC8789283; doi:10.7554/eLife.70341)
Supplement: Figure 7—source data 1. [file elife-70341-fig7-data1.xlsx]

## Sheet: Figure 7
Spectrin+ fibers for Figure 7C N=individual images
Spectrin+ fibers 2 weeks
17Ubic	93	36	71	66
17Abic	26	16
17UM	24	7	5	4
17AM	3	2	4
Spectrin+ fibers 4 weeks
17Ubic	47	143	77
17Abic	33	32	12	25	30	25
17UM	16	7	12	33	18	46
17AM	3	8	4
qPCR for Figure 7C
Delta Ct Values were calculated for each gene normalized to RPL13A and then Fold change relative to RPL13A is shown
MBD3L2 2 wks
17Ubic	0.0159533	0.0371627	0.00567958	0.020193	1.4739e-05	6.68797e-06	0.000223103	3.2482e-05	0.000129928	4.1744e-06	0.0231957	0.0147822
17Abic	4.22807	8.11168	7.72749	6.10504	2.37841	0.426317	1.67018	3.07375	1.20581	2.39496	1.03526	1.39474
17UM	0.000886249	0.000782295	0.00183501	0.000212537	0.00544822	0.0297699
17AM	0.716978	1.25701	2.05623	0.397768	0.594604	0.373712	0.406126
MYH8 2 wks
17Ubic	19.1597	19.9733	16.6795	21.5557	2.02792	1	0.558644	2.77022	1.04247	1.86607	9.00047	15.3482
17Abic	5.54044	6.9644	6.10504	8.51496	1.87905	0.97942	0.607097	0.812252	0.965936	1.06437	1.64718	1.58008
17UM	4.08405	6.82108	3.70635	1.51572	17.3878	4.95883
17AM	1.93187	2.63902	3.16017	1.26576	1.84038	1.53688	1.69349
CKM 2 wks
17Ubic	121.938	119.428	66.257	116.162	1.69349	2.20381	1.49485	19.4271	6.06287	1.16473	77.1717	104.691
17Abic	22.4711	25.2813	29.446	26.5382	5.09824	11.2356	0.712025	2.23457	2.94854	1.64718	7.94474	5.50217
17UM	40.7859	48.5029	51.2685	2.12874	321.795	183.546
17AM	22.3159	15.8895	6.36429	18.6357	14.42	9.51366	4.11246
DUX4 2 wks
17Ubic	0.000109256	9.06081e-05	0.000132658	8.39564e-05	5.27672e-05	8.33765e-05	0.00031771	6.10352e-05
17Abic	0.0245183	0.0243489	0.0093553	0.0457527	0.0211969	0.0536603	0.0266448	0.0356489
17UM	0.00139067	0.00129754	0.0138882	0.000745244
17AM	0.0638133	0.0432847	0.101532	0.0633725	0.0441942	0.046714	0.0125167
MBD3L2 4 wks
17Ubic	0.0100268	0.052193	0.0480273	0.00191293	0.0030861	0.0387409	0.0277763	0.0230355	0.023357
17Abic	0.31864	1.15669	0.309927	0.301452	0.411796	1.65864	2.69447	3.22657	4.78991
17UM	0.000815516	0.00255936	0.0099575
17AM	0.100134	0.0426888	0.0319066
MYH8 4 wks
17Ubic	4.11246	7.3615	6.9644	4.19887	8.28212	11.5514	14.723	8.75435	16.9123
17Abic	0.721965	0.965936	0.895025	0.381565	0.812252	4.50023	6.54322	7.67411	4.05584
17UM	1.68179	1.04972	0.277392
17AM	0.888843	0.230047	1.42405	0.366021
CKM 4 wks
17Ubic	42.2243	33.5909	49.8665	18.2522	29.6508	52.7098	68.5935	40.2244	78.249
17Abic	2.73208	4.37717	11.1579	1.17283	4.59479	32.8996	24.59	40.7859	11.1579
17UM	17.8766	41.0696	7.51618
17AM	10.7779	2.21914	34.7755	13.9288
DUX4 4 wks
17Ubic	0.000185024	0.000458751	0.000205297	0.000618045	0.000177487	0.000109256	9.06081e-05	0.000132658	8.39564e-05
17Abic	0.0121744	0.0953912	0.0818996	0.108819	0.0196408	0.0245183	0.0243489	0.0093553	0.0457527
17UM	0.00342424	0.00122755
17AM	0.0392817	0.0273939	0.121582	0.00866851
2 weeks % human RPL13A Figure 7D
17Ubic	65.4436	27.4308	28.0929
17Abic	41.1155	55.0712	49.9072
17UM	10.5473	8.46373	9.40985
17AM	14.177	5.34308	8.42461
2 weeks % human MYH2 Figure 7D
17Ubic	64.0396	24.5801	32.5137
17Abic	23.0804	26.468	24.001
17UM	21.8645	21.7095	21.5194
17AM	21.4436	21.3141	21.8564
4 weeks % human RPL13A Figure 7D
17Ubic	41.9063	44.5779	41.9505
17Abic	6.99509	18.0491	22.0994
17UM	16.2853	0.98338	1.90077
17AM	9.79163	4.62216	1.13976
4 weeks % human MYH2 Figure 7D
17Ubic	58.178	68.1165	56.6388
17Abic	21.2594	24.3299	24.8974
17UM	21.7405	21.4597	21.6015
17AM	21.2024	21.8777	20.988
