# Supplementary material for: iMyoblasts for ex vivo and in vivo investigations of human myogenesis and disease modeling
Source: eLife. 2022 Jan 25;11:e70341. doi: 10.7554/eLife.70341 (PMC8789283; doi:10.7554/eLife.70341)
Supplement: Figure 8—source data 1. [file elife-70341-fig8-data1.xlsx]

## Sheet: Figure 8
NanoString Normalized counts for Figure 8
Raw counts for each sample were normalized to a suite of housekeeping genes
	17Ubic D6		17Abic D6			17UM D6		17AM D6		17Ubic 2wk xenograft						17Abic 2wk xenograft						17UM 2wk xenograft						17AM 2wk xenograft						17Ubic 4wk xenograft			17Abic 4wk xenograft			17UM 4wk xenograft			17AM 4wk xenograft
MYH1	301.34	381.41	761.16	791.96	853.19	20.21	11.59	26.8	13.87	3387.51	910.27	1559.2				2464.3	3588.32	4554.08				14249.3	7841.54	6454.67				3839	1230.2	3990.15
MYH2	1651.87	1391.86	3902.39	3692.1	2933.16	47.54	30.64	132.86	122.03	15498.4	26827.9	20073	17544.3	15171.8	14420.3	11773.4	6902.96	7412.02	9835.13	7450.32	3538.26	6258.95	9064.18	1971.43	15356	28886.6	12300.6	8723.36	15931.1	14532.2	2563.84	8685.7		14420.2	10621.8	21005.2	22767	8499.65	14246.8	2386.57	6667.76	6503.69	63801.1	16653.8	70955.4
MYH3	27152.2	43672.8	34528.1	33390.5	29975	17545.3	10263.6	37011.6	34928.2	50385.2	17339.9	32705.5	52223.2	51336.2	56427.8	9390.92	8109.94	9187.39	12598.9	1833.51	2891.96	652.05	1066.99	2149.26	697.04	380.92	652.3	2054.35	1747.69	569.54	820.52	1467.4		10383.3	11952	15909.3	1414.9	2905.39	2335.32	38.77	111.99	130.48	236.56	295.87	141.77
MYH4	26.84	6.63	11.44	9.87	7.49	5.94	7.45	3.35	5.55	16.16	26.39	24.46				6.23	6.58	3.22				15.11	15.23	2.84				5.86	11.59					6.34	8.3	13.64	36.75	11.1	13.05	1.94	13.84	1.94	20.13	28.45	49.07
MYH7	1478.63	1899.3	3866.81	3489.79	2111.02	143.81	91.91	614.07	630.97	17645.5	4472	10344	8544.01	9115.93	13625.3	2019.16	1936.83	1739.98	1576.62	209.29	331	49.98	104.24	118.17	65.94	16.98	67.11	159.29	109.23	24.76	33.31	60.05		10178.5	12576.4	16813.6	539.01	1554.48	1100.25	34.41	25.17	17.04	226.49	142.24	92.7
MYH8	14088.5	24773.8	24467.8	24225	19658.6	2713.45	1693.22	1510.61	1594.77	6658.13	4277.12	6018.39	7894.4	5762.71	6407.82	2744.81	2952.3	2737.47	3245.11	420.37	858.88	120.88	238.93	339.75	183.68	46.1	109.5	277.58	188.67	57.78	92.92	119.41		2244.15	1986.36	2398.28	1053.52	886.42	776.27	15.03	22.65	16.26	70.47	108.1	43.62
