# Supplementary material for: iMyoblasts for ex vivo and in vivo investigations of human myogenesis and disease modeling
Source: eLife. 2022 Jan 25;11:e70341. doi: 10.7554/eLife.70341 (PMC8789283; doi:10.7554/eLife.70341)
Supplement: Figure 9—source data 1. [file elife-70341-fig9-data1.xlsx]

## Sheet: Figure 9
Figure 9B
Delta Ct Values were calculated for each gene normalized to RPL13A and then Fold change relative to RPL13A is shown
	R7					17UM						17Ubic								WWS
MYH8	1.7411	22.4711	3.24901	0.712025	1.23114	4.08405	6.82108	3.70635	1.51572	17.3878	4.95883	19.1597	19.9733	16.6795	21.5557	2.02792	1	0.558644	2.77022	4.50023	5.89708	5.73582	1.89212
MYH1	0.316439	4.37717	0.0217929	0.00464534	0.00382586	0.598739	0.882703	0.48971	0.00445611	0.00916277	0.332171	0.570382	0.460094	0.737135	0.80107	0.0708052	0.0390103	0.0227183	0.216134	0.721965	0.102949	0.0204749	0.628507
CKM	12.9063	48.1679	24.9333	1.79005	4.65893	40.7859	48.5029	51.2685	2.12874	321.795	183.546	121.938	119.428	66.257	116.162	1.69349	2.20381	1.49485	19.4271	95.6704	5.77572	3.5801	25.1067
Figure 9C
qPCR Raw Ct values for muscle xenografts
	Mouse TA									17UM					15AM			WWS
RPL13A	40	40	40	40.11	40	39.37	30.44	37.08	32.33	28.84	32.42	30.02	29.19	31.39	26.44	25.06	27.39	31.87	24.07	22.62	29.54	24.26
CKM	40	40	40	40	40	40	40	38.5292	38.3582	26.08	26.36	26.63	25.81	26.03	26.1672	27.0257	27.3498	25.29	21.53	20.78	24.89	28.3166
MYH8	35.72	35.69	35.59	35.75	34.24	33.95	34.89	34.91	33.88	29.3	29.96	30.15	29.54	31.31	27.84	26.07	27.02	29.69	21.51	20.1	28.62	27.84
MYH1	39.54	40	38.02	37.81	36.72	37.9	37.06	38.16	37.25	32.04	35.83	34.16	32.53	35.94	25.78	27.98	26.11	32.34	27.34	28.23	30.21	28.71
Figure 9E
MFI of Laminin/myosin+ myotubes (mean + SD)
Biopsy MT	395	371	383	397	375	395
FP iMT	305	285	264	270	276	269
WWS iMT	195	193	176	182	187	186
Figure 9F
Mean Intensity
FP iMT	WWS iMT	Biopsy MT
1.0786	0.43266	1.86796
