# Supplementary material for: iMyoblasts for ex vivo and in vivo investigations of human myogenesis and disease modeling
Source: eLife. 2022 Jan 25;11:e70341. doi: 10.7554/eLife.70341 (PMC8789283; doi:10.7554/eLife.70341)
Supplement: Figure 10—source data 1. [file elife-70341-fig10-data1.xlsx]

## Sheet: Figure 10
% PAX3+ cells for Figure 10A N=individual images
17UM	62.5	50	66.1017	42.3729
WWS	50	58.0645	65.3061	66.6667	67.8571	65.2174
% PAX3+ cells for Figure 10B N=individual images
Primary
WWS	70.7317	84.2105	77.2727	84.2105	79.1667	85
Secondary
WWS	88.4615	33.9286	76.7857	36.5854
