# Supplementary material for: iMyoblasts for ex vivo and in vivo investigations of human myogenesis and disease modeling
Source: eLife. 2022 Jan 25;11:e70341. doi: 10.7554/eLife.70341 (PMC8789283; doi:10.7554/eLife.70341)
Supplement: Supplementary file 2. — For each of the 15 pairwise comparisons (shown in separate tabs), the goana and kegga functions in edgeR were used to rank the top 20 Gene Ontology (GO) terms from each of the biological process (BP), cellular component (CC) and molecular function (MF) branches of GO, and the top 20 KEGG pathways, based on overrepresentation among the DE genes. Terms comprising N ( < 500) genes are sorted by P.Up and P.Down. For each term, the top DE Genes.Up and Genes.Down (ordered by P Value) are listed, up to a maximum of 30 genes. [file elife-70341-supp2.xlsx]

## Sheet: iMyoblast vs bMyo
Supplementary file 2. Top 20 Up and Down GO terms (BP, CC, MF) and KEGG pathways for pairwise cell type comparisons. Terms comprising N (< 500) genes are sorted by P.Up and P.Down. For each term, the top Genes.Up and Genes.Down are listed.
Comparison	Ont	Dir	GO/KEGG ID	GO Term / KEGG Pathway (top 20 Up and Down)	N	Up	Down	P.Up	P.Down	FDR.Up	FDR.Down	Genes.Up (limited to a maximum of the top 30 Up genes)	Genes.Down (limited to a maximum of the top 30 Down genes)
iMyoblast vs bMyo	BP	Up	GO:0006935	chemotaxis	408	49	42	1.79113e-09	0.00102435	2.05403e-05	0.0937374	AGRN, GATA3, PTPRA, HBEGF, SHC3, LYN, HOXB9, GPSM3, AKIRIN1, BCAR1, NRXN3, SLIT2, CDH4, SEMA3A, CYFIP2, GLI2, NOTCH1, FLT1, SEMA3D, TUBB2B, DOCK4, PDGFA, THBS1, TGFB2, PLXNA2, ALCAM, ISL1, MYH10, CMTM7, NTN4	HSD3B7, DRAXIN, NFASC, VEGFA, CSF1, FGF7, FPR1, LAMA2, NTNG1, LRP1, ENPP2, NTRK3, PGF, APOA1, SEMA4C, NR4A1, DAPK2, GPNMB, EDNRB, EVL, CHN1, NCAM1, CCL28, CAMK1D, SEMA7A, VEGFB, GDNF, DOK5, BOC, PALLD
iMyoblast vs bMyo	BP	Up	GO:0042330	taxis	410	49	42	2.02218e-09	0.00110094	2.05403e-05	0.0976661	AGRN, GATA3, PTPRA, HBEGF, SHC3, LYN, HOXB9, GPSM3, AKIRIN1, BCAR1, NRXN3, SLIT2, CDH4, SEMA3A, CYFIP2, GLI2, NOTCH1, FLT1, SEMA3D, TUBB2B, DOCK4, PDGFA, THBS1, TGFB2, PLXNA2, ALCAM, ISL1, MYH10, CMTM7, NTN4	HSD3B7, DRAXIN, NFASC, VEGFA, CSF1, FGF7, FPR1, LAMA2, NTNG1, LRP1, ENPP2, NTRK3, PGF, APOA1, SEMA4C, NR4A1, DAPK2, GPNMB, EDNRB, EVL, CHN1, NCAM1, CCL28, CAMK1D, SEMA7A, VEGFB, GDNF, DOK5, BOC, PALLD
iMyoblast vs bMyo	BP	Up	GO:0030198	extracellular matrix organization	269	34	48	8.48193e-08	5.5282e-12	0.000319579	3.40611e-08	AGRN, MMP1, COL4A5, MFAP2, HAPLN1, SPINT2, COL4A1, COL25A1, COL4A2, SPP1, COL4A6, NOTCH1, PDGFA, THBS1, TGFB2, ITGA4, LAMB3, MMP23B, CTGF, QSOX1, LAMC2, SPINT1, COL13A1, NTN4, ETS1, COL8A1, ITGA2, MMP16, THSD4, LOXL2	MYF5, MMP2, MFAP5, TNFRSF1B, ELN, HAS1, ITGA7, TGFBI, EGFLAM, HTRA1, EFEMP2, LAMA2, ITGB7, ADAMTS5, LRP1, KAZALD1, COL6A2, ADAMTS4, HAS2, COL6A1, OLFML2A, FAP, ABL1, VIT, ADAMTS2, MMP3, COL1A2, SCX, MELTF, COL6A3
iMyoblast vs bMyo	BP	Up	GO:0043062	extracellular structure organization	270	34	48	9.84717e-08	6.7066e-12	0.000319579	3.40611e-08	AGRN, MMP1, COL4A5, MFAP2, HAPLN1, SPINT2, COL4A1, COL25A1, COL4A2, SPP1, COL4A6, NOTCH1, PDGFA, THBS1, TGFB2, ITGA4, LAMB3, MMP23B, CTGF, QSOX1, LAMC2, SPINT1, COL13A1, NTN4, ETS1, COL8A1, ITGA2, MMP16, THSD4, LOXL2	MYF5, MMP2, MFAP5, TNFRSF1B, ELN, HAS1, ITGA7, TGFBI, EGFLAM, HTRA1, EFEMP2, LAMA2, ITGB7, ADAMTS5, LRP1, KAZALD1, COL6A2, ADAMTS4, HAS2, COL6A1, OLFML2A, FAP, ABL1, VIT, ADAMTS2, MMP3, COL1A2, SCX, MELTF, COL6A3
iMyoblast vs bMyo	BP	Up	GO:0048812	neuron projection morphogenesis	494	50	37	1.62256e-07	0.124448	0.000329623	1	AGRN, ADGRB3, GATA3, PTPRA, SHC3, DICER1, BTBD3, COL25A1, NRXN3, SLIT2, EIF2AK4, NRK, CDH4, SPP1, SEMA3A, CNTNAP1, METRN, CYFIP2, GLI2, NOTCH1, UCHL1, SEMA3D, TUBB2B, CDH2, STK26, NLGN1, RIMS2, ITGA4, PLXNA2, SYT1	DRAXIN, NFASC, VEGFA, NGEF, LAMA2, NTNG1, LRP1, WNT7B, NTRK3, ITPKA, SEMA4C, S100A6, ABL1, EVL, CHN1, GAS7, NCAM1, CAMK2A, SEMA7A, GDNF, DOK5, BOC, PALLD, NTF3, FLRT2, FGFR2, NFIB, TMEM108, BMP7, ARC
iMyoblast vs bMyo	BP	Up	GO:0007411	axon guidance	201	28	19	4.415e-07	0.0513527	0.000664229	0.769397	AGRN, GATA3, PTPRA, SHC3, NRXN3, SLIT2, CDH4, SEMA3A, CYFIP2, GLI2, SEMA3D, TUBB2B, PLXNA2, ALCAM, ISL1, MYH10, NTN4, SEMA3E, BDNF, EPHB2, DCC, EXT1, NOG, OPHN1, RELN, EPHA2, CRMP1, SH3KBP1	DRAXIN, NFASC, VEGFA, LAMA2, NTNG1, LRP1, SEMA4C, EVL, CHN1, NCAM1, SEMA7A, GDNF, DOK5, BOC, PALLD, FLRT2, NFIB, BMP7, NTNG2
iMyoblast vs bMyo	BP	Up	GO:0044057	regulation of system process	365	41	26	4.67142e-07	0.296404	0.000664229	1	DSG2, HBEGF, DICER1, CACNG8, ADA, RGS4, SEMA3A, OXTR, NOTCH1, CYBA, DOCK4, NLGN1, TGFB2, RIMS2, MYL9, CTSC, DSP, MYRF, WNK4, PRKCZ, EHD3, CTGF, KCNK6, CNN1, HAND2, CACNA2D4, PKP2, MYOCD, ITGA2, JUP	TNFRSF1B, ADRA2C, DES, GLS, SGCA, ATP2B1, SCN5A, APOA1, NPTX2, IRX5, KLF4, EDNRB, ITPR3, PTGER2, EMP2, SLC1A1, CAV3, SCT, TMEM108, CELF2, CAMK2D, PER2, SHANK2, HDAC4, DMPK, ADRA2A
iMyoblast vs bMyo	BP	Up	GO:0097485	neuron projection guidance	202	28	19	4.90447e-07	0.0535276	0.000664229	0.783127	AGRN, GATA3, PTPRA, SHC3, NRXN3, SLIT2, CDH4, SEMA3A, CYFIP2, GLI2, SEMA3D, TUBB2B, PLXNA2, ALCAM, ISL1, MYH10, NTN4, SEMA3E, BDNF, EPHB2, DCC, EXT1, NOG, OPHN1, RELN, EPHA2, CRMP1, SH3KBP1	DRAXIN, NFASC, VEGFA, LAMA2, NTNG1, LRP1, SEMA4C, EVL, CHN1, NCAM1, SEMA7A, GDNF, DOK5, BOC, PALLD, FLRT2, NFIB, BMP7, NTNG2
iMyoblast vs bMyo	BP	Up	GO:0006937	regulation of muscle contraction	115	19	8	1.25476e-06	0.391904	0.00145727	1	DSG2, ADA, OXTR, DOCK4, MYL9, DSP, EHD3, CTGF, CNN1, PKP2, MYOCD, ITGA2, JUP, EDN1, TBXA2R, PRKG1, TPM1, SPX, F2R	ADRA2C, ATP2B1, SCN5A, CAV3, CAMK2D, HDAC4, DMPK, ADRA2A
iMyoblast vs bMyo	BP	Up	GO:0040017	positive regulation of locomotion	407	41	44	1.64301e-06	8.92395e-05	0.00175672	0.0197054	GATA3, GCNT2, HBEGF, ANXA3, LYN, GPSM3, AKIRIN1, BCAR1, SLIT2, SEMA3A, NOTCH1, FLT1, JCAD, SEMA3D, KITLG, TUBB2B, NOX4, DOCK4, PDGFA, TEK, THBS1, TGFB2, SCARB1, ITGA4, PIK3R3, LAMC2, NEDD9, ETS1, SEMA3E, ITGA2	FERMT3, VEGFA, HMOX1, XG, MIA3, PLPP3, CSF1, IL1R1, TNFAIP6, FGF7, LRP1, HAS2, PYCARD, CEMIP, INSR, ENPP2, NTRK3, PGF, SEMA4C, ABL1, DAPK2, GPNMB, TNFRSF14, SNAI2, ATOH8, CAMK1D, SNAI1, SEMA7A, VEGFB, JUN
iMyoblast vs bMyo	BP	Up	GO:0070268	cornification	32	10	6	2.41006e-06	0.0167294	0.00243291	0.450144	KRT8, DSG2, KRT18, DSP, DSC3, KRT7, PKP2, JUP, KRT19, KRT15	CYP26B1, KRT86, KRT81, KRT17, LCE3D, CSTA
iMyoblast vs bMyo	BP	Up	GO:0061564	axon development	388	40	32	2.55183e-06	0.0538188	0.00243291	0.783127	AGRN, GATA3, PTPRA, SHC3, COL25A1, NRXN3, SLIT2, CDH4, SPP1, SEMA3A, SCARF1, METRN, CYFIP2, GLI2, NOTCH1, UCHL1, SEMA3D, TUBB2B, CDH2, ITGA4, PLXNA2, ALCAM, ISL1, MYH10, NTN4, SEMA3E, BDNF, EPHB2, DCC, MAP6	DRAXIN, NFASC, VEGFA, LAMA2, NTNG1, LRP1, NTRK3, APOA1, SEMA4C, KREMEN1, S100A6, ABL1, KLF4, EVL, CHN1, NCAM1, SEMA7A, GDNF, DOK5, BOC, JUN, PALLD, FLRT2, FGFR2, NFIB, BMP7, ARHGAP4, OLFM1, SIPA1L1, NTNG2
iMyoblast vs bMyo	BP	Up	GO:0001525	angiogenesis	378	39	31	2.65285e-06	0.0545952	0.00243291	0.787155	ADGRB3, TIE1, ANXA3, HMGA2, COL4A1, SFRP1, EGFL7, COL4A2, SLIT2, NOTCH1, FLT1, JCAD, OTULIN, PDGFA, TEK, THBS1, TGFB2, PTPRB, CTGF, PIK3R3, ISL1, HAND2, TCF21, ETS1, SEMA3E, COL8A1, EPHB2, JUP, CSPG4, GATA6	RBPJ, MMP2, RORA, VEGFA, HMOX1, MIA3, TGFBI, TBX1, ANPEP, ENPP2, PGF, PTGIS, FAP, ABL1, NR4A1, KLF4, GPNMB, SMAD1, EMP2, BTG1, VEGFB, JUN, FGFR2, FGF18, ADAM12, PLCD1, SULF1, KLF5, COL8A2, ECM1
iMyoblast vs bMyo	BP	Up	GO:0070304	positive regulation of stress-activated protein kinase signaling cascade	121	19	5	3.09188e-06	0.866585	0.00257474	1	SH3RF3, LYN, NRK, SEMA3A, MAP3K11, TRAF4, TGFB2, CTGF, RIPK2, INAVA, SH3RF1, HAND2, TLR4, ERCC6, SH3RF2, EDN1, MLKL, MAP4K2, GDF6	LTBR, VEGFA, WNT7B, PYCARD, SEMA4C
iMyoblast vs bMyo	BP	Up	GO:0030155	regulation of cell adhesion	474	45	41	3.23114e-06	0.0119847	0.00257474	0.375725	RAC3, IGFBP2, GATA3, GCNT2, PAWR, LYN, SPINT2, ARHGDIB, SFRP1, ADA, EDIL3, GLI2, NOTCH1, TEK, THBS1, TGFB2, ITGA4, DLC1, PLXNA2, PRKCZ, RIPK2, MBP, AKNA, NEDD9, ETS1, SEMA3E, COL8A1, ITGA2, STX3, JUP	MYF5, FERMT3, VEGFA, MIA3, PLPP3, CSF1, TGFBI, EGFLAM, ASS1, LAMA2, LRP1, SPOCK1, HAS2, PYCARD, APOA1, CEBPB, ABL1, VIT, KLF4, GPNMB, TNFRSF14, SNAI2, RASA1, CCL28, EMP2, MELTF, LPXN, PDPN, CD47, BMP7
iMyoblast vs bMyo	BP	Up	GO:0048514	blood vessel morphogenesis	454	44	39	3.29527e-06	0.0182618	0.00257474	0.471996	ADGRB3, TIE1, ANXA3, HMGA2, COL4A1, SFRP1, EGFL7, COL4A2, SLIT2, NR2F2, NOTCH1, FLT1, JCAD, OTULIN, PDGFA, CDH2, TEK, THBS1, TGFB2, PTPRB, CTGF, PIK3R3, ISL1, HAND2, TCF21, ETS1, SEMA3E, COL8A1, MYOCD, EPHB2	RBPJ, MMP2, RORA, VEGFA, HMOX1, MIA3, TGFBI, TBX1, ANPEP, LRP1, SGCD, HAS2, WNT7B, ENPP2, JUNB, PGF, PTGIS, ZFP36L1, FAP, ABL1, NR4A1, KLF4, GPNMB, PRRX1, SMAD1, RASA1, EMP2, BTG1, VEGFB, JUN
iMyoblast vs bMyo	BP	Up	GO:0006940	regulation of smooth muscle contraction	41	11	3	3.49152e-06	0.50341	0.00262704	1	ADA, OXTR, DOCK4, CNN1, MYOCD, ITGA2, EDN1, TBXA2R, PRKG1, SPX, F2R	ADRA2C, ATP2B1, ADRA2A
iMyoblast vs bMyo	BP	Up	GO:0045987	positive regulation of smooth muscle contraction	20	8	0	3.6523e-06	1	0.00264378	1	ADA, OXTR, MYOCD, ITGA2, EDN1, TBXA2R, SPX, F2R
iMyoblast vs bMyo	BP	Up	GO:0003205	cardiac chamber development	145	21	15	3.89936e-06	0.031669	0.00264378	0.642072	AP2B1, GATA3, ADGRG6, LUZP1, SLIT2, NOTCH1, FZD2, TEK, TGFB2, DSP, ISL1, MYH10, HAND2, PKP2, MYOCD, CITED2, GATA6, NOG, COL11A1, TPM1, FOXF1	RBPJ, FZD1, TBX1, SCN5A, DHRS3, CAV3, FGFR2, BMP7, MESP1, PAX8, BMP4, MSX2, HEYL, PCSK5, SHOX2
iMyoblast vs bMyo	BP	Up	GO:0007409	axonogenesis	355	37	28	5.12171e-06	0.105852	0.00335637	0.957003	AGRN, GATA3, PTPRA, SHC3, COL25A1, NRXN3, SLIT2, CDH4, SPP1, SEMA3A, METRN, CYFIP2, GLI2, NOTCH1, UCHL1, SEMA3D, TUBB2B, CDH2, ITGA4, PLXNA2, ALCAM, ISL1, MYH10, NTN4, SEMA3E, BDNF, EPHB2, DCC, MAP6, EXT1	DRAXIN, NFASC, VEGFA, LAMA2, NTNG1, LRP1, NTRK3, SEMA4C, S100A6, ABL1, EVL, CHN1, NCAM1, SEMA7A, GDNF, DOK5, BOC, PALLD, FLRT2, FGFR2, NFIB, BMP7, ARHGAP4, OLFM1, SIPA1L1, NTNG2, SHOX2, NR4A2
iMyoblast vs bMyo	BP	Down	GO:0030198	extracellular matrix organization	269	34	48	8.48193e-08	5.5282e-12	0.000319579	3.40611e-08	AGRN, MMP1, COL4A5, MFAP2, HAPLN1, SPINT2, COL4A1, COL25A1, COL4A2, SPP1, COL4A6, NOTCH1, PDGFA, THBS1, TGFB2, ITGA4, LAMB3, MMP23B, CTGF, QSOX1, LAMC2, SPINT1, COL13A1, NTN4, ETS1, COL8A1, ITGA2, MMP16, THSD4, LOXL2	MYF5, MMP2, MFAP5, TNFRSF1B, ELN, HAS1, ITGA7, TGFBI, EGFLAM, HTRA1, EFEMP2, LAMA2, ITGB7, ADAMTS5, LRP1, KAZALD1, COL6A2, ADAMTS4, HAS2, COL6A1, OLFML2A, FAP, ABL1, VIT, ADAMTS2, MMP3, COL1A2, SCX, MELTF, COL6A3
iMyoblast vs bMyo	BP	Down	GO:0043062	extracellular structure organization	270	34	48	9.84717e-08	6.7066e-12	0.000319579	3.40611e-08	AGRN, MMP1, COL4A5, MFAP2, HAPLN1, SPINT2, COL4A1, COL25A1, COL4A2, SPP1, COL4A6, NOTCH1, PDGFA, THBS1, TGFB2, ITGA4, LAMB3, MMP23B, CTGF, QSOX1, LAMC2, SPINT1, COL13A1, NTN4, ETS1, COL8A1, ITGA2, MMP16, THSD4, LOXL2	MYF5, MMP2, MFAP5, TNFRSF1B, ELN, HAS1, ITGA7, TGFBI, EGFLAM, HTRA1, EFEMP2, LAMA2, ITGB7, ADAMTS5, LRP1, KAZALD1, COL6A2, ADAMTS4, HAS2, COL6A1, OLFML2A, FAP, ABL1, VIT, ADAMTS2, MMP3, COL1A2, SCX, MELTF, COL6A3
iMyoblast vs bMyo	BP	Down	GO:0060349	bone morphogenesis	86	4	24	0.594773	2.54443e-10	1	9.69219e-07	TFAP2A, TEK, COL13A1, MMP16	CYP26B1, COL6A2, HAS2, COL6A1, LTBP3, VIT, ALPL, RARG, TGFB3, SCX, COL6A3, AXIN2, HOXA11, DHRS3, INSIG2, FGFR2, FGF18, INSIG1, COL7A1, VWA1, BMP4, MSX2, SHOX2, NAB2
iMyoblast vs bMyo	BP	Down	GO:0051216	cartilage development	161	11	34	0.159835	3.1338e-10	1	9.69219e-07	HMGA2, GLI2, ADAMTS12, CTGF, HAND2, RFLNB, LOXL2, NOG, EDN1, COL11A1, GDF6	MYF5, PAX7, TGFBI, SIX2, COL6A2, COL6A1, WNT7B, LTBP3, ZEB1, VIT, RARG, MAF, PRRX1, WNT9A, SNAI2, SMAD1, SNAI1, SCX, COL6A3, AXIN2, HOXA11, TIMP1, FGF18, NFIB, BMP7, SULF1, ECM1, WISP1, COL7A1, SATB2
iMyoblast vs bMyo	BP	Down	GO:0001503	ossification	297	23	47	0.00866999	3.33967e-10	0.296018	9.69219e-07	TFAP2A, CHRDL1, SFRP1, SPP1, GLI2, NOTCH1, DCHS1, TEK, TGFB2, CTGF, COL13A1, HAND2, DDX21, MMP16, RFLNB, EXT1, NOG, S1PR1, TUFT1, COL11A1, RRAS2, SRGN, EPHA2	MYF5, RBPJ, MMP2, FZD1, CSF1, SIX2, KAZALD1, ATP2B1, COL6A1, WNT7B, JUNB, LTBP3, CEBPB, KREMEN1, ALPL, ANKH, GPNMB, SNAI2, FAM20C, SMAD1, SNAI1, XYLT1, COL1A2, TOB1, SEMA7A, TGFB3, SCX, AXIN2, DHRS3, SOX8
iMyoblast vs bMyo	BP	Down	GO:0030855	epithelial cell differentiation	411	33	57	0.00134316	1.38504e-09	0.103489	3.51713e-06	KRT8, DSG2, KRT18, GATA3, SPINT2, COL4A1, FAT1, NR2F2, NOTCH1, FZD2, CDH2, FLNB, SLC7A11, CLDN1, DSP, SH3BP1, BCR, DSC3, KRT7, TCF21, PKP2, FRMD6, ITGA2, SHROOM3, JUP, GATA6, S1PR1, KRT19, TIGAR, OPHN1	RBPJ, MGMT, CYP26B1, VEGFA, ACADVL, ANXA7, FZD1, DLX3, PITX3, TBX1, SIX2, MTSS1, PTER, WNT7B, NTRK3, CES1, ZFP36L1, CEBPB, VIM, KRT86, ABL1, ZEB1, KLF4, RARG, MAF, LCE3A, FAM20C, AKR1C3, ATOH8, LBH
iMyoblast vs bMyo	BP	Down	GO:0001501	skeletal system development	394	32	56	0.00213279	2.29673e-09	0.135178	4.66581e-06	FLI1, HOXB8, TFAP2A, HMGA2, HAPLN1, HOXB9, SFRP1, GLI2, PLS3, ADAMTS12, DCHS1, TEK, TGFB2, PAPSS2, HOXC6, HOXC8, TEAD4, CTGF, COL13A1, HAND2, ETS2, MMP16, EXTL1, RFLNB, EXT1, LOXL2, NOG, EDN1, MDFI, COL11A1	MYF5, MMP2, VKORC1, CYP26B1, PAX7, TGFBI, TBX1, SIX2, COL6A2, ADAMTS4, HAS2, COL6A1, WNT7B, LTBP3, DMRT2, ZEB1, IRX5, VIT, ALPL, ANKH, RARG, MAF, PRRX1, WNT9A, SNAI2, FAM20C, SMAD1, SNAI1, XYLT1, COL1A2
iMyoblast vs bMyo	BP	Down	GO:0061448	connective tissue development	214	15	38	0.0899675	2.74387e-09	0.814842	5.06743e-06	HMGA2, GLI2, NOTCH1, ADAMTS12, SERPINB7, CTGF, HAND2, RFLNB, LOXL2, NOG, EDN1, SORL1, COL11A1, GDF6, PDGFRB	MYF5, PAX7, CSF1, TGFBI, SIX2, COL6A2, COL6A1, WNT7B, LTBP3, ZEB1, VIT, RARG, MAF, PRRX1, WNT9A, SNAI2, SMAD1, SNAI1, EGR1, SCX, COL6A3, AXIN2, HOXA11, TIMP1, SOX8, ARRDC3, FGF18, NFIB, BMP7, SULF1
iMyoblast vs bMyo	BP	Down	GO:0048705	skeletal system morphogenesis	183	12	34	0.161859	6.40638e-09	1	1.08455e-05	HOXB8, TFAP2A, SFRP1, TEK, HOXC8, CTGF, COL13A1, MMP16, RFLNB, NOG, MDFI, COL11A1	MYF5, MMP2, CYP26B1, TBX1, SIX2, COL6A2, HAS2, COL6A1, LTBP3, ZEB1, IRX5, VIT, ALPL, RARG, PRRX1, WNT9A, TGFB3, SCX, COL6A3, AXIN2, HOXA11, DHRS3, INSIG2, FGFR2, FGF18, BMP7, INSIG1, COL7A1, SATB2, VWA1
iMyoblast vs bMyo	BP	Down	GO:0002062	chondrocyte differentiation	101	8	24	0.11664	1.14601e-08	0.907026	1.66294e-05	HMGA2, GLI2, ADAMTS12, CTGF, RFLNB, LOXL2, COL11A1, GDF6	TGFBI, SIX2, COL6A2, COL6A1, LTBP3, VIT, RARG, MAF, WNT9A, SNAI2, SCX, COL6A3, AXIN2, HOXA11, FGF18, NFIB, SULF1, ECM1, WISP1, COL7A1, VWA1, BMP4, MSX2, SHOX2
iMyoblast vs bMyo	BP	Down	GO:0060688	regulation of morphogenesis of a branching structure	45	5	15	0.0508276	1.99216e-08	0.64941	2.52943e-05	SFRP1, PDGFA, BCL11A, NTN4, NOG	VEGFA, FGF7, SIX2, PGF, ABL1, SNAI2, GDNF, SOX8, CAV3, FGFR2, BMP7, SULF1, PAX8, BMP4, SHOX2
iMyoblast vs bMyo	BP	Down	GO:0060348	bone development	169	9	30	0.395308	1.05825e-07	1	0.000126461	FLI1, TFAP2A, PLS3, DCHS1, TEK, PAPSS2, COL13A1, MMP16, RFLNB	VKORC1, CYP26B1, COL6A2, HAS2, COL6A1, LTBP3, VIT, ALPL, RARG, FAM20C, SMAD1, XYLT1, TGFB3, SCX, COL6A3, AXIN2, HOXA11, DHRS3, INSIG2, FGFR2, FGF18, INSIG1, SULF1, WISP1, COL7A1, VWA1, BMP4, MSX2, SHOX2, NAB2
iMyoblast vs bMyo	BP	Down	GO:0035914	skeletal muscle cell differentiation	54	3	15	0.439999	2.90415e-07	1	0.000327766	AKIRIN1, NOTCH1, MYOCD	NUPR1, MYF5, MYF6, CYP26B1, PAX7, TBX1, SAP30, NR1D2, CDON, EGR1, SCX, SOX8, KLF5, KLHL41, HEYL
iMyoblast vs bMyo	BP	Down	GO:0002063	chondrocyte development	39	2	13	0.573437	4.30234e-07	1	0.00046001	RFLNB, COL11A1	COL6A2, COL6A1, VIT, RARG, COL6A3, AXIN2, FGF18, SULF1, ECM1, COL7A1, VWA1, MSX2, SHOX2
iMyoblast vs bMyo	BP	Down	GO:0048598	embryonic morphogenesis	437	38	53	0.00013153	6.34752e-07	0.0228379	0.000618465	AFF3, GATA3, HOXB8, TFAP2A, HMGA2, MFAP2, SPINT2, LUZP1, SFRP1, COL4A2, GLI2, NOTCH1, FLT1, FZD2, TGFB2, ITGA4, DLC1, LAMB3, NDRG4, BCR, MBP, SPINT1, HAND2, TCF21, COL8A1, ETS2, ITGA2, EPHB2, SHROOM3, MMP16	MYF5, MMP2, CYP26B1, ITGA7, FZD1, LRIG1, TBX1, SIX2, GREM2, TSHZ1, COL6A1, WNT7B, APOA1, ZFP36L1, SEMA4C, ABL1, ZEB1, IRX5, IRX3, KLF4, RARG, TCF7, PRRX1, WNT9A, CDON, SMAD1, ATOH8, SNAI1, TGFB3, SCX
iMyoblast vs bMyo	BP	Down	GO:0030278	regulation of ossification	147	9	26	0.241093	6.39319e-07	1	0.000618465	TFAP2A, SFRP1, NOTCH1, TGFB2, HAND2, RFLNB, NOG, S1PR1, SRGN	RBPJ, CSF1, SIX2, ATP2B1, WNT7B, LTBP3, CEBPB, KREMEN1, ANKH, SNAI2, FAM20C, SMAD1, TOB1, TGFB3, AXIN2, DHRS3, FGFR2, BMP7, DDR2, CTHRC1, ECM1, WISP1, PBX1, HDAC4, BMP4, MSX2
iMyoblast vs bMyo	BP	Down	GO:0001649	osteoblast differentiation	173	9	28	0.360335	6.70325e-07	1	0.000618984	SFRP1, SPP1, GLI2, NOTCH1, HAND2, DDX21, NOG, RRAS2, EPHA2	FZD1, COL6A1, WNT7B, JUNB, CEBPB, ALPL, GPNMB, SNAI2, FAM20C, SMAD1, SNAI1, TOB1, SEMA7A, AXIN2, SOX8, PENK, FGFR2, BMP7, DDR2, CTHRC1, WISP1, CAT, HDAC4, SATB2, MRC2, BMP4, MSX2, SHOX2
iMyoblast vs bMyo	BP	Down	GO:0060350	endochondral bone morphogenesis	57	3	15	0.51997	1.4271e-06	1	0.0012605	TEK, COL13A1, MMP16	COL6A2, COL6A1, VIT, ALPL, RARG, SCX, COL6A3, AXIN2, HOXA11, FGF18, COL7A1, VWA1, BMP4, SHOX2, NAB2
iMyoblast vs bMyo	BP	Down	GO:0048706	embryonic skeletal system development	103	9	21	0.0630178	1.51954e-06	0.707818	0.00128623	HOXB8, TFAP2A, HOXB9, HOXC6, MMP16, EXT1, NOG, MDFI, COL11A1	MYF5, PAX7, TBX1, SIX2, DMRT2, ZEB1, IRX5, PRRX1, WNT9A, XYLT1, TGFB3, SCX, HOXA11, FGFR2, BMP7, SULF1, PBX1, SATB2, BMP4, PCSK5, SHOX2
iMyoblast vs bMyo	BP	Down	GO:0060538	skeletal muscle organ development	137	7	24	0.434534	1.5881e-06	1	0.00129049	AKIRIN1, NR2F2, NOTCH1, FLNB, ANKRD1, TCF21, MYOCD	NUPR1, MYF5, ELN, MYF6, CYP26B1, PAX7, MSC, TBX1, ASS1, SRPK3, VAMP5, SAP30, IGSF8, NR1D2, CDON, EGR1, SCX, SOX8, KLF5, KLHL41, HDAC4, HEYL, CHRNA1, SHOX2
iMyoblast vs bMyo	CC	Up	GO:0005911	cell-cell junction	302	37	18	9.0471e-08	0.589775	0.000319579	1	KRT8, DSG2, ESAM, SHROOM2, FAT1, CNTNAP1, CNN2, NOTCH1, FRMD4A, JCAD, TRAF4, CDH2, TEK, TMEM204, CLDN1, DSP, WNK4, PRKCZ, SH3BP1, SV2A, CCDC85C, USP53, DSC3, COL13A1, PKP2, FRMD6, CADM4, TRPC4, SHROOM3, PLEKHG5	LSR, NFASC, DES, CLMP, PMP22, PLPP3, SGCA, VAMP5, NECTIN4, SCN5A, PCDHGA12, MXRA8, CLDN23, CAV3, FLRT2, JAM2, FGFR4, KLHL24
iMyoblast vs bMyo	CC	Up	GO:0032432	actin filament bundle	67	15	6	1.07743e-07	0.169371	0.000319579	1	ZYX, CNN2, PLS3, CYBA, NOX4, TEK, FLNB, MYL9, FBLIM1, PRKCZ, MYH10, PLS1, RFLNB, TPM1, SHROOM4	PDLIM4, PDLIM3, CRYAB, SH2B2, SYNPO2, LIMCH1
iMyoblast vs bMyo	CC	Up	GO:0098642	network-forming collagen trimer	5	5	0	1.41581e-07	1	0.000319579	1	COL4A5, COL4A1, COL4A2, COL4A6, COL8A1
iMyoblast vs bMyo	CC	Up	GO:0098645	collagen network	5	5	0	1.41581e-07	1	0.000319579	1	COL4A5, COL4A1, COL4A2, COL4A6, COL8A1
iMyoblast vs bMyo	CC	Up	GO:0098651	basement membrane collagen trimer	5	5	0	1.41581e-07	1	0.000319579	1	COL4A5, COL4A1, COL4A2, COL4A6, COL8A1
iMyoblast vs bMyo	CC	Up	GO:0031012	extracellular matrix	310	36	63	3.93818e-07	5.99637e-18	0.000664229	1.21816e-13	AGRN, MMP1, COL4A5, MFAP2, HAPLN1, COL4A1, SFRP1, COL25A1, EGFL7, COL4A2, COL4A6, EDIL3, CD248, LTBP4, CDH2, THBS1, TGFB2, LAMB3, CTSC, MMP23B, CTGF, LAMC2, COL13A1, P3H2, NTN4, COL8A1, MMP16, CSPG4, THSD4, ELFN2	ANGPTL2, MMP2, MFAP5, ELN, VEGFA, ANXA7, CTSZ, TGFBI, EGFLAM, HTRA1, EFEMP2, LRIG1, S100A4, LAMA2, ADAMTS5, KAZALD1, LTBP2, COL6A2, ADAMTS4, COL6A1, OLFML2A, CTSF, SERPING1, APOA1, LTBP3, LGALS3BP, COLEC12, S100A6, VIT, ALPL
iMyoblast vs bMyo	CC	Up	GO:0062023	collagen-containing extracellular matrix	254	31	52	4.79713e-07	1.16865e-15	0.000664229	1.18705e-11	AGRN, COL4A5, MFAP2, HAPLN1, COL4A1, SFRP1, COL25A1, EGFL7, COL4A2, COL4A6, EDIL3, LTBP4, CDH2, THBS1, TGFB2, LAMB3, CTSC, MMP23B, CTGF, LAMC2, COL13A1, P3H2, NTN4, COL8A1, CSPG4, THSD4, LOXL2, COL11A1, NID1, TGM2	ANGPTL2, MMP2, MFAP5, ELN, ANXA7, CTSZ, TGFBI, EGFLAM, HTRA1, EFEMP2, S100A4, LAMA2, ADAMTS5, KAZALD1, LTBP2, COL6A2, ADAMTS4, COL6A1, CTSF, SERPING1, APOA1, LTBP3, LGALS3BP, S100A6, VIT, TIMP3, CTSD, CDON, ADAMTS2, NCAM1
iMyoblast vs bMyo	CC	Up	GO:0005938	cell cortex	246	30	11	5.64675e-07	0.855558	0.00071696	1	HCLS1, SHROOM2, DSTN, FNBP1L, RHOF, SNCA, CDH2, FLNB, RIMS2, DLC1, PRKCZ, SH3BP1, CTGF, GPSM1, LAMC2, MYH10, EXOC6, NEDD9, RAI14, GYPC, TRPC4, SHROOM3, PLS1, RHOD, SLC2A1, KRT19, SEPT6, EXOC3L2, RHOJ, SHROOM4	CTSZ, AGTRAP, STXBP6, FMNL1, FGFR2, HMCN2, ARC, CABP1, CD302, ARHGAP32, PLEKHH2
iMyoblast vs bMyo	CC	Up	GO:0016324	apical plasma membrane	181	25	9	2.75446e-06	0.828099	0.00243291	1	DSG2, IGFBP2, SHROOM2, F2RL2, ATP8B1, FAT1, OXTR, NOTCH1, CYBA, NOX4, CDH2, STK26, TEK, CLDN1, PRKCZ, SLC29A1, MTCL1, SHROOM3, STX3, CSPG4, SLC2A1, GPR143, PLD1, PDGFRB, SHROOM4	NAALADL1, ATP2B1, SLC39A4, EMP2, SLC1A1, PDPN, DDR2, SHANK2, P2RY6
iMyoblast vs bMyo	CC	Up	GO:0005587	collagen type IV trimer	4	4	0	3.90418e-06	1	0.00264378	1	COL4A5, COL4A1, COL4A2, COL4A6
iMyoblast vs bMyo	CC	Up	GO:0001725	stress fiber	61	12	5	8.03777e-06	0.248772	0.00422937	1	ZYX, CNN2, CYBA, NOX4, TEK, FLNB, MYL9, FBLIM1, PRKCZ, MYH10, TPM1, SHROOM4	PDLIM4, PDLIM3, SH2B2, SYNPO2, LIMCH1
iMyoblast vs bMyo	CC	Up	GO:0097517	contractile actin filament bundle	61	12	5	8.03777e-06	0.248772	0.00422937	1	ZYX, CNN2, CYBA, NOX4, TEK, FLNB, MYL9, FBLIM1, PRKCZ, MYH10, TPM1, SHROOM4	PDLIM4, PDLIM3, SH2B2, SYNPO2, LIMCH1
iMyoblast vs bMyo	CC	Up	GO:0005925	focal adhesion	385	34	24	8.72118e-06	0.183685	0.00442927	1	AFAP1, BCAR1, ZYX, ZNF185, FAT1, CNN2, PVR, FLT1, CYBA, FZD2, NOX4, CDH2, TEK, FLNB, ITGA4, DLC1, FBLIM1, SCARF2, EHD3, TES, PRAG1, ALCAM, CNN1, NEDD9, ITGA2, HMGA1, JUP, CSPG4, APBB1IP, RRAS2	ITGBL1, PARVB, NFASC, FZD1, ITGB7, LRP1, VIM, FAP, FBLN7, EVL, CAPN5, ADGRE5, B2M, LPXN, PALLD, CAV3, FLRT2, DDR2, KLF11, SYNPO2, CAT, MRC2, PLAU, TLN2
iMyoblast vs bMyo	CC	Up	GO:0030055	cell-substrate junction	390	34	24	1.1978e-05	0.203322	0.00528984	1	AFAP1, BCAR1, ZYX, ZNF185, FAT1, CNN2, PVR, FLT1, CYBA, FZD2, NOX4, CDH2, TEK, FLNB, ITGA4, DLC1, FBLIM1, SCARF2, EHD3, TES, PRAG1, ALCAM, CNN1, NEDD9, ITGA2, HMGA1, JUP, CSPG4, APBB1IP, RRAS2	ITGBL1, PARVB, NFASC, FZD1, ITGB7, LRP1, VIM, FAP, FBLN7, EVL, CAPN5, ADGRE5, B2M, LPXN, PALLD, CAV3, FLRT2, DDR2, KLF11, SYNPO2, CAT, MRC2, PLAU, TLN2
iMyoblast vs bMyo	CC	Up	GO:0015629	actin cytoskeleton	415	38	28	1.69147e-05	0.217408	0.00602847	1	RAC3, HCLS1, PAWR, SHROOM2, AFAP1, BCAR1, ASAP1, ZYX, ZNF185, DSTN, CNN2, BAIAP2L1, PLS3, FLT1, CYBA, SNCA, NOX4, CDH2, TEK, FLNB, DLC1, MYL9, FBLIM1, PRKCZ, MYH10, SAMD14, GABARAP, SHROOM3, PLS1, JUP	FERMT3, LSP1, PARVB, PDLIM4, PDLIM3, MTSS1, PGM1, ABL1, TMOD2, GAS7, CAVIN2, STK17B, GBP2, LPXN, PALLD, AMPH, DDR2, ARC, CRYAB, SH2B2, SYNPO2, ARHGAP32, HDAC4, DPYSL3, ARHGAP6, LIMCH1, TLN2, PLEKHH2
iMyoblast vs bMyo	CC	Up	GO:0045177	apical part of cell	229	27	14	1.78011e-05	0.593464	0.00623499	1	DSG2, IGFBP2, SHROOM2, F2RL2, ATP8B1, FAT1, OXTR, NOTCH1, CYBA, DCHS1, NOX4, CDH2, STK26, TEK, CLCN5, CLDN1, PRKCZ, SLC29A1, MTCL1, SHROOM3, STX3, CSPG4, SLC2A1, GPR143, PLD1, PDGFRB, SHROOM4	HOMER2, NAALADL1, LRP1, ATP2B1, FAP, SLC39A4, ITPR3, EMP2, SLC1A1, PDPN, DDR2, SHANK2, SLC25A27, P2RY6
iMyoblast vs bMyo	CC	Up	GO:0098644	complex of collagen trimers	16	6	2	3.28437e-05	0.223011	0.00963813	1	COL4A5, COL4A1, COL4A2, COL4A6, COL8A1, COL11A1	COL1A2, COL7A1
iMyoblast vs bMyo	CC	Up	GO:0042641	actomyosin	73	12	6	5.82964e-05	0.223564	0.0133264	1	ZYX, CNN2, CYBA, NOX4, TEK, FLNB, MYL9, FBLIM1, PRKCZ, MYH10, TPM1, SHROOM4	PDLIM4, PDLIM3, SH2B2, SYNPO2, HDAC4, LIMCH1
iMyoblast vs bMyo	CC	Up	GO:0030027	lamellipodium	170	19	10	0.000101878	0.460166	0.0191635	1	IGF2BP1, RAC3, BCAR1, FAT1, ABI3, KITLG, CDH2, SH3BP1, SH3RF1, MYH10, NEDD9, FGD6, PLEKHG5, STX3, CSPG4, APBB1IP, WASF3, FGD4, EPHA2	PARVB, PDLIM4, FAP, EVL, PALLD, PDPN, ACTG2, DPYSL3, PLEKHH2, ARHGEF6
iMyoblast vs bMyo	CC	Up	GO:0005604	basement membrane	72	12	12	0.000104435	0.00115626	0.0194641	0.101685	AGRN, COL4A5, COL4A1, COL4A2, COL4A6, LAMB3, LAMC2, P3H2, NTN4, COL8A1, LOXL2, NID1	TGFBI, EGFLAM, EFEMP2, LAMA2, TIMP3, TIMP1, LOXL1, HMCN2, COL8A2, COL7A1, LAMA3, VWA1
iMyoblast vs bMyo	CC	Down	GO:0031012	extracellular matrix	310	36	63	3.93818e-07	5.99637e-18	0.000664229	1.21816e-13	AGRN, MMP1, COL4A5, MFAP2, HAPLN1, COL4A1, SFRP1, COL25A1, EGFL7, COL4A2, COL4A6, EDIL3, CD248, LTBP4, CDH2, THBS1, TGFB2, LAMB3, CTSC, MMP23B, CTGF, LAMC2, COL13A1, P3H2, NTN4, COL8A1, MMP16, CSPG4, THSD4, ELFN2	ANGPTL2, MMP2, MFAP5, ELN, VEGFA, ANXA7, CTSZ, TGFBI, EGFLAM, HTRA1, EFEMP2, LRIG1, S100A4, LAMA2, ADAMTS5, KAZALD1, LTBP2, COL6A2, ADAMTS4, COL6A1, OLFML2A, CTSF, SERPING1, APOA1, LTBP3, LGALS3BP, COLEC12, S100A6, VIT, ALPL
iMyoblast vs bMyo	CC	Down	GO:0062023	collagen-containing extracellular matrix	254	31	52	4.79713e-07	1.16865e-15	0.000664229	1.18705e-11	AGRN, COL4A5, MFAP2, HAPLN1, COL4A1, SFRP1, COL25A1, EGFL7, COL4A2, COL4A6, EDIL3, LTBP4, CDH2, THBS1, TGFB2, LAMB3, CTSC, MMP23B, CTGF, LAMC2, COL13A1, P3H2, NTN4, COL8A1, CSPG4, THSD4, LOXL2, COL11A1, NID1, TGM2	ANGPTL2, MMP2, MFAP5, ELN, ANXA7, CTSZ, TGFBI, EGFLAM, HTRA1, EFEMP2, S100A4, LAMA2, ADAMTS5, KAZALD1, LTBP2, COL6A2, ADAMTS4, COL6A1, CTSF, SERPING1, APOA1, LTBP3, LGALS3BP, S100A6, VIT, TIMP3, CTSD, CDON, ADAMTS2, NCAM1
iMyoblast vs bMyo	CC	Down	GO:0034774	secretory granule lumen	230	10	29	0.480804	1.76354e-05	1	0.00747429	PLAC8, CNN2, PDGFA, THBS1, TGFB2, CTSC, TOR4A, QSOX1, JUP, SRGN	ISLR, FERMT3, VEGFA, GHDC, CTSZ, CRACR2A, CTSA, PYCARD, SERPING1, APOA1, LGALS3BP, ARSA, SELENOP, F8, DPP7, TIMP3, CTSD, B2M, TGFB3, VEGFB, TIMP1, PENK, F13A1, GUSB, ECM1, CAT, OSCAR, PROS1, CRISPLD2
iMyoblast vs bMyo	CC	Down	GO:0005788	endoplasmic reticulum lumen	229	22	30	0.000466484	1.79169e-05	0.0526479	0.00747429	TSPAN14, COL4A5, CHRDL1, COL4A1, COL25A1, COL4A2, SPP1, COL4A6, PDGFA, CDH2, THBS1, BCHE, CTSC, TOR4A, ARSJ, QSOX1, COL13A1, P3H2, COL8A1, EDN1, FKBP14, COL11A1	RCN3, NOTUM, RDH5, CTSZ, MIA3, CSF1, ADAMTS5, COL6A2, COL6A1, WNT7B, APOA1, CES1, P4HA2, ARSA, F8, H6PD, FAM20C, MXRA8, COL1A2, B2M, MELTF, COL6A3, TIMP1, PENK, GPX7, COL8A2, F10, COL7A1, VWA1, BMP4
iMyoblast vs bMyo	CC	Down	GO:0060205	cytoplasmic vesicle lumen	232	11	29	0.3632	2.05408e-05	1	0.00802473	PLAC8, ADA, CNN2, PDGFA, THBS1, TGFB2, CTSC, TOR4A, QSOX1, JUP, SRGN	ISLR, FERMT3, VEGFA, GHDC, CTSZ, CRACR2A, CTSA, PYCARD, SERPING1, APOA1, LGALS3BP, ARSA, SELENOP, F8, DPP7, TIMP3, CTSD, B2M, TGFB3, VEGFB, TIMP1, PENK, F13A1, GUSB, ECM1, CAT, OSCAR, PROS1, CRISPLD2
iMyoblast vs bMyo	CC	Down	GO:0031983	vesicle lumen	233	11	29	0.367799	2.20664e-05	1	0.00845809	PLAC8, ADA, CNN2, PDGFA, THBS1, TGFB2, CTSC, TOR4A, QSOX1, JUP, SRGN	ISLR, FERMT3, VEGFA, GHDC, CTSZ, CRACR2A, CTSA, PYCARD, SERPING1, APOA1, LGALS3BP, ARSA, SELENOP, F8, DPP7, TIMP3, CTSD, B2M, TGFB3, VEGFB, TIMP1, PENK, F13A1, GUSB, ECM1, CAT, OSCAR, PROS1, CRISPLD2
iMyoblast vs bMyo	CC	Down	GO:0009986	cell surface	444	36	50	0.00141713	3.41259e-05	0.106232	0.0106053	DSG2, TSPAN14, HBEGF, SMIM1, SFRP1, EGFL7, ADA, CDH4, PVR, CD248, NOTCH1, PDGFA, CDH2, TEK, THBS1, NLGN1, SCARB1, SLC7A11, ITGA4, IL27RA, CDH10, ALCAM, MBP, TLR4, ITGA2, TRPC4, MMP16, CSPG4, KCNQ3, CD163L1	ITGBL1, CD63, CLMP, VEGFA, CTSZ, MR1, ITGA7, FZD1, IL1R1, ENOX1, SLC1A3, ANPEP, ITGB7, IL13RA2, VAMP5, SCN5A, INSR, APOA1, CDH15, FAP, PPFIA4, CAPN5, TNFRSF14, HLA-F, NCAM1, CRLF1, EMP2, MXRA8, HLA-A, B2M
iMyoblast vs bMyo	CC	Down	GO:0005614	interstitial matrix	9	0	5	1	9.39779e-05	1	0.0204858		EGFLAM, KAZALD1, VIT, VWA1, ABI3BP
iMyoblast vs bMyo	CC	Down	GO:0031093	platelet alpha granule lumen	46	6	10	0.0133561	0.000186818	0.374765	0.0321564	PDGFA, THBS1, TGFB2, TOR4A, QSOX1, SRGN	ISLR, FERMT3, VEGFA, SERPING1, F8, TGFB3, VEGFB, TIMP1, F13A1, PROS1
iMyoblast vs bMyo	CC	Down	GO:0031089	platelet dense granule lumen	7	0	4	1	0.00020028	1	0.0330788		LGALS3BP, SELENOP, TIMP3, ECM1
iMyoblast vs bMyo	CC	Down	GO:0042612	MHC class I protein complex	7	0	4	1	0.000335985	1	0.0452022		MR1, HLA-F, HLA-A, B2M
iMyoblast vs bMyo	CC	Down	GO:0042611	MHC protein complex	11	0	5	1	0.000399169	1	0.0514375		MR1, HLA-F, HLA-A, B2M, HLA-DMA
iMyoblast vs bMyo	CC	Down	GO:0042827	platelet dense granule	13	0	5	1	0.000468771	1	0.0565014		CD63, LGALS3BP, SELENOP, TIMP3, ECM1
iMyoblast vs bMyo	CC	Down	GO:0005604	basement membrane	72	12	12	0.000104435	0.00115626	0.0194641	0.101685	AGRN, COL4A5, COL4A1, COL4A2, COL4A6, LAMB3, LAMC2, P3H2, NTN4, COL8A1, LOXL2, NID1	TGFBI, EGFLAM, EFEMP2, LAMA2, TIMP3, TIMP1, LOXL1, HMCN2, COL8A2, COL7A1, LAMA3, VWA1
iMyoblast vs bMyo	CC	Down	GO:0005581	collagen trimer	51	9	10	0.000794517	0.00134357	0.0737014	0.114583	COL4A5, COL4A1, COL25A1, COL4A2, C1QTNF6, COL4A6, COL13A1, COL8A1, COL11A1	COL6A2, COL6A1, COLEC12, C1QTNF2, COL1A2, COL6A3, CTHRC1, COL8A2, COL7A1, C1QL1
iMyoblast vs bMyo	CC	Down	GO:0072562	blood microparticle	49	2	9	0.650912	0.0018689	1	0.141667	BCHE, SLC2A1	C1R, SERPING1, APOA1, LGALS3BP, C1S, F13A1, ACTG2, HSPA2, PROS1
iMyoblast vs bMyo	CC	Down	GO:0016528	sarcoplasm	63	2	10	0.772016	0.00294436	1	0.189287	THBS1, P3H2	SGCD, RASD1, SPOCK1, ITPR3, JPH2, CAMK2D, KLHL41, DMPK, JSRP1, ANK1
iMyoblast vs bMyo	CC	Down	GO:0031091	platelet alpha granule	65	8	10	0.00686756	0.00336905	0.261753	0.204917	SNCA, PDGFA, THBS1, TGFB2, TOR4A, QSOX1, PCDH7, SRGN	ISLR, FERMT3, VEGFA, SERPING1, F8, TGFB3, VEGFB, TIMP1, F13A1, PROS1
iMyoblast vs bMyo	CC	Down	GO:1904724	tertiary granule lumen	36	2	7	0.466787	0.00356207	1	0.210524	CNN2, QSOX1	TNFAIP6, PGM1, FTH1, CTSD, B2M, METTL7A, OSCAR
iMyoblast vs bMyo	CC	Down	GO:0046658	anchored component of plasma membrane	25	1	6	0.706985	0.00367624	1	0.212772	CNTN1	NTNG1, GAS1, MELTF, CD24, GPC6, NTNG2
iMyoblast vs bMyo	MF	Up	GO:0005201	extracellular matrix structural constituent	113	19	20	1.29121e-06	1.65507e-05	0.00145727	0.00740221	AGRN, COL4A5, MFAP2, HAPLN1, COL4A1, COL25A1, COL4A2, COL4A6, EDIL3, LTBP4, THBS1, LAMB3, LAMC2, COL13A1, COL8A1, THSD4, TUFT1, COL11A1, NID1	MFAP5, ELN, TGFBI, EFEMP2, LAMA2, LTBP2, COL6A2, COL6A1, COL1A2, COL6A3, PRG4, HMCN2, CTHRC1, COL8A2, ECM1, MFAP4, COL7A1, LAMA3, VWA1, ABI3BP
iMyoblast vs bMyo	MF	Up	GO:0086083	cell adhesive protein binding involved in bundle of His cell-Purkinje myocyte communication	5	4	0	1.28163e-05	1	0.00531859	1	DSG2, DSP, PKP2, JUP
iMyoblast vs bMyo	MF	Up	GO:0050840	extracellular matrix binding	47	10	7	2.72071e-05	0.0159629	0.00863612	0.440769	AGRN, ADGRG6, SLIT2, SPP1, CD248, THBS1, NTN4, ITGA2, COL11A1, NID1	ELN, VEGFA, TGFBI, ADAMTS5, SPOCK1, OLFML2A, ECM1
iMyoblast vs bMyo	MF	Up	GO:0043236	laminin binding	24	7	1	3.74916e-05	0.736257	0.0103327	1	AGRN, ADGRG6, SLIT2, THBS1, NTN4, ITGA2, NID1	ECM1
iMyoblast vs bMyo	MF	Up	GO:0001540	amyloid-beta binding	55	11	5	7.39907e-05	0.289948	0.0157768	1	APBA2, COL25A1, NLGN1, TGFB2, SCARB1, BCHE, TLR4, ITGA2, EPHB2, SORL1, FBXO2	BACE2, LRP1, INSR, APOA1, CRYAB
iMyoblast vs bMyo	MF	Up	GO:0030020	extracellular matrix structural constituent conferring tensile strength	31	8	6	8.02571e-05	0.0113314	0.016637	0.361623	COL4A5, COL4A1, COL25A1, COL4A2, COL4A6, COL13A1, COL8A1, COL11A1	COL6A2, COL6A1, COL1A2, COL6A3, COL8A2, COL7A1
iMyoblast vs bMyo	MF	Up	GO:0004862	cAMP-dependent protein kinase inhibitor activity	8	4	0	0.000145862	1	0.0235174	1	PKIB, PKIG, PRKAR2B, PRKAG2
iMyoblast vs bMyo	MF	Up	GO:0050839	cell adhesion molecule binding	434	35	19	0.000163435	0.870541	0.0253449	1	DSG2, KRT18, LYN, MB21D2, ASAP1, FNBP1L, NRXN3, CDH4, SPP1, CNN2, BAIAP2L1, PVR, EDIL3, LTBP4, CDH2, THBS1, NLGN1, PTPRB, FLNB, ITGA4, PDXDC1, HIST1H3E, DSP, HIST1H3F, TES, CTGF, CDH10, ADAM23, PKP2, ITGA2	ITGBL1, FERMT3, NDRG1, NRXN2, ANXA7, TGFBI, NTNG1, ITGB7, ADAMTS5, NECTIN4, CDH15, FAP, GPNMB, EMP2, SEMA7A, STXBP6, VASN, WISP1, LAMA3
iMyoblast vs bMyo	MF	Up	GO:0043237	laminin-1 binding	4	3	0	0.000213062	1	0.0306976	1	SLIT2, NTN4, NID1
iMyoblast vs bMyo	MF	Up	GO:0008603	cAMP-dependent protein kinase regulator activity	9	4	0	0.000245236	1	0.033662	1	PKIB, PKIG, PRKAR2B, PRKAG2
iMyoblast vs bMyo	MF	Up	GO:0030169	low-density lipoprotein particle binding	8	4	1	0.000261724	0.388542	0.0347511	1	SCARF1, THBS1, SCARB1, SORL1	COLEC12
iMyoblast vs bMyo	MF	Up	GO:0017124	SH3 domain binding	108	14	9	0.00054272	0.219692	0.0583352	1	HCLS1, LYN, AFAP1, BCAR1, CNTNAP1, ABI3, CYBA, DNM1, DOCK4, SH3BP1, SGIP1, AFAP1L1, ADAM19, SH3KBP1	EFS, ABL1, EVL, SH3BGR, PLSCR4, ADAM12, SHANK2, DPYSL3, ARHGAP6
iMyoblast vs bMyo	MF	Up	GO:0038023	signaling receptor activity	465	42	52	0.000570075	0.000425664	0.060187	0.0526803	ADGRB3, ADGRL2, PEAR1, PTPRA, TIE1, ADGRG6, F2RL2, NRXN3, SCARF1, CNTNAP1, OXTR, PVR, NR2F2, LTBP4, NOTCH1, FLT1, FZD2, TEK, NLGN1, PTPRB, SCARB1, ITGA4, IL27RA, PLXNA2, PTGIR, GPR162, TLR4, CRIM1, ITGA2, EPHB2	NR1D1, TNFRSF1B, NRXN2, RORA, ADRA2C, MR1, FZD1, IL1R1, PTGFR, ANPEP, MMD, FPR1, ITGB7, LRP1, IL13RA2, NECTIN4, INSR, NTRK3, NR4A1, RARG, EDNRB, IL21R, NR1D2, GABRB2, TNFRSF14, ADGRE5, PTGER2, CRLF1, THBD, AGTRAP
iMyoblast vs bMyo	MF	Up	GO:0060089	molecular transducer activity	465	42	52	0.000570075	0.000425664	0.060187	0.0526803	ADGRB3, ADGRL2, PEAR1, PTPRA, TIE1, ADGRG6, F2RL2, NRXN3, SCARF1, CNTNAP1, OXTR, PVR, NR2F2, LTBP4, NOTCH1, FLT1, FZD2, TEK, NLGN1, PTPRB, SCARB1, ITGA4, IL27RA, PLXNA2, PTGIR, GPR162, TLR4, CRIM1, ITGA2, EPHB2	NR1D1, TNFRSF1B, NRXN2, RORA, ADRA2C, MR1, FZD1, IL1R1, PTGFR, ANPEP, MMD, FPR1, ITGB7, LRP1, IL13RA2, NECTIN4, INSR, NTRK3, NR4A1, RARG, EDNRB, IL21R, NR1D2, GABRB2, TNFRSF14, ADGRE5, PTGER2, CRLF1, THBD, AGTRAP
iMyoblast vs bMyo	MF	Up	GO:0005509	calcium ion binding	394	34	46	0.000705315	3.20106e-05	0.069895	0.0105712	AGRN, DSG2, PCDH10, ANXA3, MICU3, EGFL7, SLIT2, CDH4, FAT1, EDIL3, CD248, LTBP4, NOTCH1, PCDHA10, PLS3, SNCA, DCHS1, CDH2, THBS1, MYL9, SYT1, EHD3, CDH10, DSC3, PLCB2, PLS1, PCDHA12, GALNT3, LOXL2, PCDH7	RCN3, S100A2, MGMT, PRRG4, SNED1, ANXA7, C1R, EGFLAM, EPDR1, NAALADL1, EFEMP2, S100A4, CABP4, LRP1, SGCA, CRACR2A, FKBP9, LTBP2, SPOCK1, ENPP2, LTBP3, CDH15, C1S, ARSA, STIM2, S100A6, FBLN7, ITPR3, ADGRE5, FAM20C
iMyoblast vs bMyo	MF	Up	GO:0004888	transmembrane signaling receptor activity	345	34	38	0.000738086	0.0055088	0.0716216	0.250922	ADGRB3, ADGRL2, PTPRA, TIE1, ADGRG6, F2RL2, SCARF1, OXTR, LTBP4, NOTCH1, FLT1, FZD2, TEK, PTPRB, IL27RA, PLXNA2, PTGIR, GPR162, TLR4, CRIM1, ITGA2, EPHB2, DCC, GPRC5A, GPR143, S1PR1, GAL, TNFRSF10D, TBXA2R, SORL1	TNFRSF1B, NRXN2, ADRA2C, MR1, FZD1, IL1R1, PTGFR, FPR1, IL13RA2, INSR, NTRK3, EDNRB, IL21R, GABRB2, TNFRSF14, ADGRE5, PTGER2, CRLF1, THBD, AGTRAP, PLA2R1, IL17RD, SLC22A17, FGFR2, DDR2, FGFR4, GABRE, KRT17, MET, FCER1G
iMyoblast vs bMyo	MF	Up	GO:0086080	protein binding involved in heterotypic cell-cell adhesion	11	4	2	0.00134886	0.149106	0.103489	1	DSG2, DSP, PKP2, JUP	NFASC, CD47
iMyoblast vs bMyo	MF	Up	GO:0015279	store-operated calcium channel activity	6	3	1	0.0021349	0.328724	0.135178	1	ORAI2, ORAI1, TRPC4	STIM2
iMyoblast vs bMyo	MF	Up	GO:0005198	structural molecule activity	489	34	34	0.00279161	0.0907803	0.160202	0.890059	AGRN, KRT18, COL4A5, MFAP2, HAPLN1, COL4A1, COL25A1, COL4A2, COL4A6, EDIL3, LTBP4, TUBB2B, THBS1, LAMB3, MYL9, CLDN1, DSP, KLHL3, MBP, LAMC2, COL13A1, TUBB2A, COL8A1, HMGA1, PLS1, JUP, DLG3, THSD4, KRT19, TUFT1	MFAP5, ELN, DES, TGFBI, PDLIM3, EFEMP2, LAMA2, LTBP2, COL6A2, COL6A1, VIM, CRYGS, LCE3A, COL1A2, SPAG4, CLDN23, COL6A3, PRG4, CAV3, TUBA4A, HMCN2, CRYAB, KRT17, CTHRC1, COL8A2, ECM1, MFAP4, COL7A1, LAMA3, VWA1
iMyoblast vs bMyo	MF	Up	GO:0045294	alpha-catenin binding	8	3	0	0.00311308	1	0.171973	1	CDH2, PKP2, JUP
iMyoblast vs bMyo	MF	Down	GO:0030545	receptor regulator activity	225	20	41	0.0117574	2.11117e-09	0.34956	4.66581e-06	LYPD1, HBEGF, SPP1, SEMA3A, METRN, SEMA3D, KITLG, PDGFA, TGFB2, CTGF, CMTM7, SEMA3E, BDNF, EDN1, GAL, FGF5, IL18, TNFSF15, GDF6, SPX	VEGFA, CSF1, SECTM1, FGF7, METRNL, GREM2, CSF3, WNT7B, PGF, ERFE, APOA1, SEMA4C, GPNMB, WNT9A, CCL28, CRLF1, SEMA7A, TGFB3, VEGFB, GDNF, THNSL2, FAM19A5, TIMP1, TSLP, NTF3, PENK, FLRT2, FGF18, SCT, BMP7
iMyoblast vs bMyo	MF	Down	GO:0048018	receptor ligand activity	200	19	37	0.00715117	1.10935e-08	0.268037	1.66294e-05	HBEGF, SPP1, SEMA3A, METRN, SEMA3D, KITLG, PDGFA, TGFB2, CTGF, CMTM7, SEMA3E, BDNF, EDN1, GAL, FGF5, IL18, TNFSF15, GDF6, SPX	VEGFA, CSF1, SECTM1, FGF7, METRNL, GREM2, CSF3, WNT7B, PGF, ERFE, APOA1, SEMA4C, GPNMB, WNT9A, CCL28, CRLF1, SEMA7A, TGFB3, VEGFB, GDNF, THNSL2, FAM19A5, TIMP1, TSLP, NTF3, PENK, FLRT2, FGF18, SCT, BMP7
iMyoblast vs bMyo	MF	Down	GO:0030546	signaling receptor activator activity	204	19	37	0.00869958	1.87081e-08	0.29653	2.52943e-05	HBEGF, SPP1, SEMA3A, METRN, SEMA3D, KITLG, PDGFA, TGFB2, CTGF, CMTM7, SEMA3E, BDNF, EDN1, GAL, FGF5, IL18, TNFSF15, GDF6, SPX	VEGFA, CSF1, SECTM1, FGF7, METRNL, GREM2, CSF3, WNT7B, PGF, ERFE, APOA1, SEMA4C, GPNMB, WNT9A, CCL28, CRLF1, SEMA7A, TGFB3, VEGFB, GDNF, THNSL2, FAM19A5, TIMP1, TSLP, NTF3, PENK, FLRT2, FGF18, SCT, BMP7
iMyoblast vs bMyo	MF	Down	GO:0005539	glycosaminoglycan binding	130	13	23	0.00831572	3.78838e-06	0.288776	0.00248261	AGRN, HBEGF, HAPLN1, SFRP1, COL25A1, SLIT2, LTBP4, THBS1, LXN, CTGF, LAMC2, COL13A1, COL11A1	VEGFA, TNFAIP6, EGFLAM, FGF7, GREM2, ADAMTS5, LTBP2, CEMIP, PGF, FBLN7, VIT, GPNMB, VEGFB, PCOLCE2, FGFR2, BMP7, FGFR4, SULF1, WISP1, DPYSL3, BMP4, CRISPLD2, ABI3BP
iMyoblast vs bMyo	MF	Down	GO:0001228	DNA-binding transcription activator activity, RNA polymerase II-specific	277	18	37	0.100047	5.48937e-06	0.853819	0.0032799	GATA3, FLI1, TFAP2A, HMGA2, GLI2, NOTCH1, ARID3A, MEIS2, PLAG1, POU2F2, ISL1, AKNA, HAND2, ARID3B, TCF21, ETS1, MYOCD, FOXF1	MYF5, RBPJ, RORA, MYF6, DLX3, PITX3, TBX1, SIX2, JUNB, CEBPB, EBF3, CREBRF, NR4A1, KLF4, MAF, SMAD1, EGR1, SCX, JUN, FOSB, SOX8, MAFB, NFIB, MESP1, DBP, NFIC, KLF5, CREB3L4, PBX1, NFIA
iMyoblast vs bMyo	MF	Down	GO:0001216	DNA-binding transcription activator activity	278	18	37	0.103684	6.18398e-06	0.862827	0.00358936	GATA3, FLI1, TFAP2A, HMGA2, GLI2, NOTCH1, ARID3A, MEIS2, PLAG1, POU2F2, ISL1, AKNA, HAND2, ARID3B, TCF21, ETS1, MYOCD, FOXF1	MYF5, RBPJ, RORA, MYF6, DLX3, PITX3, TBX1, SIX2, JUNB, CEBPB, EBF3, CREBRF, NR4A1, KLF4, MAF, SMAD1, EGR1, SCX, JUN, FOSB, SOX8, MAFB, NFIB, MESP1, DBP, NFIC, KLF5, CREB3L4, PBX1, NFIA
iMyoblast vs bMyo	MF	Down	GO:0042056	chemoattractant activity	20	0	8	1	1.30676e-05	1	0.00647485		VEGFA, FGF7, PGF, GPNMB, VEGFB, GDNF, NTF3, BMP4
iMyoblast vs bMyo	MF	Down	GO:0005201	extracellular matrix structural constituent	113	19	20	1.29121e-06	1.65507e-05	0.00145727	0.00740221	AGRN, COL4A5, MFAP2, HAPLN1, COL4A1, COL25A1, COL4A2, COL4A6, EDIL3, LTBP4, THBS1, LAMB3, LAMC2, COL13A1, COL8A1, THSD4, TUFT1, COL11A1, NID1	MFAP5, ELN, TGFBI, EFEMP2, LAMA2, LTBP2, COL6A2, COL6A1, COL1A2, COL6A3, PRG4, HMCN2, CTHRC1, COL8A2, ECM1, MFAP4, COL7A1, LAMA3, VWA1, ABI3BP
iMyoblast vs bMyo	MF	Down	GO:0005125	cytokine activity	87	8	18	0.0821905	1.66822e-05	0.778415	0.00740221	SPP1, KITLG, TGFB2, CMTM7, EDN1, IL18, TNFSF15, GDF6	VEGFA, CSF1, SECTM1, GREM2, CSF3, CCL28, CRLF1, TGFB3, THNSL2, FAM19A5, TIMP1, TSLP, BMP7, C1QTNF4, TNFSF9, BMP4, IL33, CCL26
iMyoblast vs bMyo	MF	Down	GO:0000978	RNA polymerase II cis-regulatory region sequence-specific DNA binding	387	23	45	0.137134	1.93466e-05	0.956234	0.00782199	GATA3, MYEF2, FLI1, TFAP2A, HMGA2, GLI2, NOTCH1, NFE2L3, MEIS2, PLAG1, BCL11A, POU2F2, ISL1, AKNA, HAND2, ARID3B, TCF21, ETS1, BATF3, ETS2, MYOCD, GATA6, DNMT3A	MYF5, NR1D1, RBPJ, RORA, CIART, MYF6, DLX3, PITX3, SIX2, TGIF1, RFX8, JUNB, CEBPB, EBF3, ZEB1, NR4A1, KLF4, TCF7, MAF, NR1D2, PRRX1, SNAI2, SMAD1, ATOH8, SNAI1, SCX, JUN, FOSB, MAFB, NFIB
iMyoblast vs bMyo	MF	Down	GO:0005509	calcium ion binding	394	34	46	0.000705315	3.20106e-05	0.069895	0.0105712	AGRN, DSG2, PCDH10, ANXA3, MICU3, EGFL7, SLIT2, CDH4, FAT1, EDIL3, CD248, LTBP4, NOTCH1, PCDHA10, PLS3, SNCA, DCHS1, CDH2, THBS1, MYL9, SYT1, EHD3, CDH10, DSC3, PLCB2, PLS1, PCDHA12, GALNT3, LOXL2, PCDH7	RCN3, S100A2, MGMT, PRRG4, SNED1, ANXA7, C1R, EGFLAM, EPDR1, NAALADL1, EFEMP2, S100A4, CABP4, LRP1, SGCA, CRACR2A, FKBP9, LTBP2, SPOCK1, ENPP2, LTBP3, CDH15, C1S, ARSA, STIM2, S100A6, FBLN7, ITPR3, ADGRE5, FAM20C
iMyoblast vs bMyo	MF	Down	GO:0000987	cis-regulatory region sequence-specific DNA binding	400	23	45	0.170097	4.09758e-05	1	0.0117243	GATA3, MYEF2, FLI1, TFAP2A, HMGA2, GLI2, NOTCH1, NFE2L3, MEIS2, PLAG1, BCL11A, POU2F2, ISL1, AKNA, HAND2, ARID3B, TCF21, ETS1, BATF3, ETS2, MYOCD, GATA6, DNMT3A	MYF5, NR1D1, RBPJ, RORA, CIART, MYF6, DLX3, PITX3, SIX2, TGIF1, RFX8, JUNB, CEBPB, EBF3, ZEB1, NR4A1, KLF4, TCF7, MAF, NR1D2, PRRX1, SNAI2, SMAD1, ATOH8, SNAI1, SCX, JUN, FOSB, MAFB, NFIB
iMyoblast vs bMyo	MF	Down	GO:0008201	heparin binding	96	10	17	0.0143215	6.29831e-05	0.384335	0.0150504	HBEGF, SFRP1, COL25A1, SLIT2, THBS1, LXN, CTGF, LAMC2, COL13A1, COL11A1	VEGFA, FGF7, GREM2, ADAMTS5, LTBP2, PGF, FBLN7, GPNMB, VEGFB, PCOLCE2, FGFR2, BMP7, FGFR4, WISP1, BMP4, CRISPLD2, ABI3BP
iMyoblast vs bMyo	MF	Down	GO:0070888	E-box binding	41	3	10	0.285544	0.000105288	1	0.0222805	GATA3, HAND2, TCF21	MYF5, NR1D1, CIART, MYF6, ZEB1, SNAI2, ATOH8, SNAI1, SCX, TCF4
iMyoblast vs bMyo	MF	Down	GO:0019838	growth factor binding	105	10	17	0.0192003	0.000115867	0.442239	0.0233075	IGFBP2, COL4A1, LTBP4, FLT1, PDGFA, TEK, THBS1, CTGF, CRIM1, PDGFRB	IL1R1, HTRA1, KAZALD1, LTBP2, SCN5A, COL6A1, INSR, NTRK3, LTBP3, COL1A2, TGFB3, IGFBP6, FGFR2, IGFBPL1, VASN, FGFR4, WISP1
iMyoblast vs bMyo	MF	Down	GO:0008236	serine-type peptidase activity	63	3	13	0.589905	0.00011753	1	0.0233075	MMP1, CTSC, RELN	MMP2, C1R, HTRA1, CTSA, C1S, FAP, DPP7, RHBDL2, MMP3, F10, PLAU, CPVL, PCSK5
iMyoblast vs bMyo	MF	Down	GO:0047023	androsterone dehydrogenase activity	3	0	3	1	0.000204508	1	0.0335048		RDH5, AKR1C3, AKR1C1
iMyoblast vs bMyo	MF	Down	GO:0016825	hydrolase activity, acting on acid phosphorus-nitrogen bonds	66	3	13	0.633024	0.00022671	1	0.0354277	MMP1, CTSC, RELN	MMP2, C1R, HTRA1, CTSA, C1S, FAP, DPP7, RHBDL2, MMP3, F10, PLAU, CPVL, PCSK5
iMyoblast vs bMyo	MF	Down	GO:0017171	serine hydrolase activity	66	3	13	0.633024	0.00022671	1	0.0354277	MMP1, CTSC, RELN	MMP2, C1R, HTRA1, CTSA, C1S, FAP, DPP7, RHBDL2, MMP3, F10, PLAU, CPVL, PCSK5
iMyoblast vs bMyo	MF	Down	GO:1901681	sulfur compound binding	162	12	22	0.0716748	0.000277387	0.735019	0.0408342	AGRN, HBEGF, SFRP1, COL25A1, SLIT2, THBS1, LXN, CTGF, LAMC2, COL13A1, ITGA2, COL11A1	VEGFA, ACADVL, PTGES, FGF7, GREM2, ADAMTS5, LRP1, LTBP2, PGF, FBLN7, GPNMB, VEGFB, PCOLCE2, FGFR2, BMP7, FGFR4, CHST15, WISP1, DPYSL3, BMP4, CRISPLD2, ABI3BP
iMyoblast vs bMyo	KEGG	Up	hsa04510	Focal adhesion	172	23	17	5.57419e-06	0.0281741	0.00187293	0.413986	RAC3, SHC3, COL4A5, BCAR1, COL4A1, ZYX, COL4A2, SPP1, COL4A6, FLT1, CCND2, PDGFA, THBS1, FLNB, ITGA4, LAMB3, MYL9, PIK3R3, LAMC2, RASGRF1, ITGA2, RELN, PDGFRB	PARVB, VEGFA, ITGA7, LAMA2, ITGB7, COL6A2, COL6A1, PGF, COL1A2, VEGFB, JUN, COL6A3, CAV3, ITGA10, MET, LAMA3, TLN2
iMyoblast vs bMyo	KEGG	Up	hsa04512	ECM-receptor interaction	64	13	10	2.006e-05	0.00845587	0.00337008	0.413376	AGRN, COL4A5, COL4A1, COL4A2, SPP1, COL4A6, THBS1, ITGA4, LAMB3, SV2A, LAMC2, ITGA2, RELN	ITGA7, LAMA2, ITGB7, COL6A2, COL6A1, COL1A2, COL6A3, CD47, ITGA10, LAMA3
iMyoblast vs bMyo	KEGG	Up	hsa05412	Arrhythmogenic right ventricular cardiomyopathy	60	11	8	0.000215533	0.0401353	0.0241397	0.413986	DSG2, TCF7L1, CACNG8, CDH2, ITGA4, DSP, CACNA2D4, PKP2, ITGA2, JUP, CACNG6	DES, ITGA7, LAMA2, ITGB7, SGCA, SGCD, TCF7, ITGA10
iMyoblast vs bMyo	KEGG	Up	hsa04611	Platelet activation	89	13	7	0.000473383	0.33837	0.0289661	1	LYN, MAPK12, PLCG2, ORAI1, PRKCZ, PIK3R3, PTGIR, PLCB2, ITGA2, APBB1IP, TBXA2R, PRKG1, F2R	FERMT3, PTGS1, ITPR3, ADCY7, COL1A2, FCER1G, TLN2
iMyoblast vs bMyo	KEGG	Up	hsa04151	PI3K-Akt signaling pathway	257	26	25	0.00050126	0.0214945	0.0289661	0.413986	COL4A5, COL4A1, COL4A2, SPP1, COL4A6, GNGT2, FLT1, KITLG, CCND2, PDGFA, TEK, THBS1, ITGA4, LAMB3, PIK3R3, LAMC2, TLR4, BDNF, ITGA2, CREB5, FGF5, RELN, F2R, EPHA2, PDGFRB, JAK3	VEGFA, ITGA7, CSF1, FGF7, LAMA2, ITGB7, CSF3, COL6A2, COL6A1, INSR, PGF, NR4A1, IRS1, COL1A2, VEGFB, COL6A3, NTF3, FGFR2, FGF18, FGFR4, ITGA10, DDIT4, MET, CREB3L4, LAMA3
iMyoblast vs bMyo	KEGG	Up	hsa05200	Pathways in cancer	404	36	29	0.000517253	0.275122	0.0289661	0.925938	RAC3, MMP1, COL4A5, TCF7L1, COL4A1, COL4A2, COL4A6, GNGT2, GLI2, NOTCH1, TRAF4, FZD2, KITLG, CCND2, PDGFA, TGFB2, LAMB3, PLCG2, BCR, PIK3R3, LAMC2, MECOM, ETS1, PLCB2, ITGA2, PLEKHG5, JUP, DCC, SLC2A1, PMAIP1	MMP2, VEGFA, HMOX1, FZD1, FGF7, LAMA2, WNT7B, PGF, ABL1, DAPK2, EDNRB, TCF7, WNT9A, ADCY7, PTGER2, CAMK2A, TGFB3, VEGFB, JUN, AXIN2, FGFR2, FGF18, FGFR4, CAMK2D, MET, LAMA3, PAX8, BMP4, HEYL
iMyoblast vs bMyo	KEGG	Up	hsa04010	MAPK signaling pathway	231	24	23	0.000684951	0.024245	0.0328777	0.413986	RAC3, CACNG8, MKNK2, FLT1, MAP3K11, KITLG, DUSP8, PDGFA, TEK, TGFB2, FLNB, MAPK12, DUSP4, MECOM, CACNA2D4, RASGRF1, BDNF, FGF5, MAP4K2, RELB, RRAS2, EPHA2, PDGFRB, CACNG6	VEGFA, CSF1, IL1R1, FGF7, INSR, PGF, NR4A1, CDC25B, RASA1, MAPKAPK3, TGFB3, VEGFB, JUN, MRAS, NTF3, FGFR2, FGF18, DUSP2, FGFR4, ARRB2, RPS6KA2, MET, HSPA2
iMyoblast vs bMyo	KEGG	Up	hsa04514	Cell adhesion molecules	86	13	12	0.00117559	0.0206868	0.0426746	0.413986	ESAM, NRXN3, CDH4, CNTNAP1, PVR, CDH2, NLGN1, ITGA4, CLDN1, ALCAM, NEGR1, CNTN1, NCAM2	NRXN2, NFASC, NTNG1, ITGB7, CDH15, HLA-F, NCAM1, HLA-A, CLDN23, HLA-DMA, JAM2, NTNG2
iMyoblast vs bMyo	KEGG	Up	hsa05146	Amoebiasis	64	10	6	0.0013046	0.22477	0.0426746	0.812074	COL4A5, COL4A1, COL4A2, COL4A6, TGFB2, LAMB3, PIK3R3, LAMC2, TLR4, PLCB2	IL1R1, LAMA2, COL1A2, TGFB3, RAB7B, LAMA3
iMyoblast vs bMyo	KEGG	Up	hsa04926	Relaxin signaling pathway	102	13	9	0.00134758	0.178618	0.0426746	0.769366	MMP1, SHC3, COL4A5, COL4A1, COL4A2, COL4A6, GNGT2, MAPK12, PRKCZ, PIK3R3, PLCB2, CREB5, EDN1	MMP2, VEGFA, EDNRB, ADCY7, COL1A2, VEGFB, JUN, ARRB2, CREB3L4
iMyoblast vs bMyo	KEGG	Up	hsa04015	Rap1 signaling pathway	159	18	16	0.00142135	0.0558971	0.0426746	0.507606	RAC3, BCAR1, FLT1, KITLG, DOCK4, PDGFA, TEK, THBS1, MAPK12, PRKCZ, PIK3R3, PLCB2, APBB1IP, FGF5, RGS14, F2R, EPHA2, PDGFRB	VEGFA, CSF1, FGF7, FPR1, INSR, PGF, EVL, ADCY7, VEGFB, MRAS, FGFR2, FGF18, FGFR4, MET, SIPA1L1, TLN2
iMyoblast vs bMyo	KEGG	Up	hsa04072	Phospholipase D signaling pathway	108	14	6	0.00155255	0.737176	0.0426746	1	SHC3, AGPAT3, DNM1, KITLG, PDGFA, PLPP2, PLCG2, PIK3R3, PLCB2, DGKA, PLD1, RRAS2, F2R, PDGFRB	PLPP3, PTGFR, INSR, ADCY7, MRAS, FCER1G
iMyoblast vs bMyo	KEGG	Up	hsa04933	AGE-RAGE signaling pathway in diabetic complications	88	12	9	0.0016511	0.113735	0.0426746	0.673362	COL4A5, COL4A1, COL4A2, COL4A6, NOX4, TGFB2, MAPK12, PLCG2, PRKCZ, PIK3R3, PLCB2, EDN1	MMP2, VEGFA, COL1A2, THBD, TGFB3, EGR1, VEGFB, JUN, PLCD1
iMyoblast vs bMyo	KEGG	Up	hsa04014	Ras signaling pathway	167	18	14	0.00218099	0.193026	0.0523438	0.772102	RAC3, SHC3, GNGT2, FLT1, KITLG, PDGFA, TEK, PLCG2, PIK3R3, ETS1, RASGRF1, ETS2, BDNF, FGF5, PLD1, RRAS2, EPHA2, PDGFRB	VEGFA, CSF1, FGF7, INSR, PGF, ABL1, RASA1, VEGFB, MRAS, NTF3, FGFR2, FGF18, FGFR4, MET
iMyoblast vs bMyo	KEGG	Up	hsa05165	Human papillomavirus infection	264	24	21	0.00262957	0.145968	0.0589024	0.715999	COL4A5, TCF7L1, COL4A1, COL4A2, IKBKE, SPP1, COL4A6, NOTCH1, FZD2, CCND2, THBS1, ITGA4, LAMB3, PRKCZ, PIK3R3, LAMC2, HES4, ITGA2, CREB5, DLG3, ATP6V0E2, MAML3, RELN, PDGFRB	RBPJ, VEGFA, ITGA7, FZD1, LAMA2, ITGB7, COL6A2, COL6A1, WNT7B, TCF7, WNT9A, HLA-F, HLA-A, COL1A2, COL6A3, AXIN2, LFNG, ITGA10, CREB3L4, LAMA3, HEYL
iMyoblast vs bMyo	KEGG	Up	hsa05206	MicroRNAs in cancer	143	14	14	0.00660576	0.0406594	0.132701	0.413986	IGF2BP1, HMGA2, DICER1, NOTCH1, CCND2, PDGFA, THBS1, TGFB2, PLCG2, PIK3R3, MMP16, DNMT3A, TPM1, PDGFRB	VEGFA, HMOX1, GLS, VIM, ABL1, ZEB1, TIMP3, BMI1, CDC25B, IRS1, DDIT4, MET, HDAC4, PLAU
iMyoblast vs bMyo	KEGG	Up	hsa00100	Steroid biosynthesis	17	4	1	0.00671405	0.641663	0.132701	1	DHCR24, FDFT1, DHCR7, TM7SF2	LIPA
iMyoblast vs bMyo	KEGG	Up	hsa04360	Axon guidance	153	16	12	0.0071713	0.331169	0.133864	0.993506	RAC3, SLIT2, SEMA3A, SEMA3D, PLCG2, MYL9, PLXNA2, PRKCZ, PIK3R3, NTN4, SEMA3E, TRPC4, EPHB2, DCC, RHOD, EPHA2	NGEF, NTNG1, SEMA4C, ABL1, RASA1, CAMK2A, SEMA7A, BOC, BMP7, CAMK2D, MET, NTNG2
iMyoblast vs bMyo	KEGG	Up	hsa05410	Hypertrophic cardiomyopathy	69	9	8	0.00910822	0.0809492	0.161072	0.597761	CACNG8, TGFB2, ITGA4, CACNA2D4, ITGA2, EDN1, PRKAG2, TPM1, CACNG6	DES, ITGA7, LAMA2, ITGB7, SGCA, SGCD, TGFB3, ITGA10
iMyoblast vs bMyo	KEGG	Up	hsa05034	Alcoholism	129	14	5	0.0100862	0.948181	0.169448	1	SHC3, GNGT2, HIST1H2BH, HIST1H3E, HIST1H3F, HIST1H4I, HIST1H4E, HIST1H2BF, SLC29A1, BDNF, CREB5, HIST2H4B, HIST1H2AC, HIST1H4D	FOSB, CREB3L4, HDAC4, NPY, CAMKK1
iMyoblast vs bMyo	KEGG	Down	hsa04978	Mineral absorption	38	0	10	1	0.000147077	1	0.0356236		MT1M, MT1A, MT1X, HMOX1, HEPH, ATP2B1, MT1F, FTH1, SLC39A4, MT1G
iMyoblast vs bMyo	KEGG	Down	hsa04610	Complement and coagulation cascades	32	2	9	0.538772	0.000239673	1	0.0356236	F2RL2, F2R	C1R, SERPING1, C1S, F8, THBD, F13A1, F10, PLAU, PROS1
iMyoblast vs bMyo	KEGG	Down	hsa00590	Arachidonic acid metabolism	26	0	8	1	0.000318068	1	0.0356236		PTGES, PTGDS, PTGIS, PTGS1, GPX3, LTC4S, AKR1C3, GPX7
iMyoblast vs bMyo	KEGG	Down	hsa00830	Retinol metabolism	18	2	6	0.286861	0.0013599	0.892873	0.114232	CYP2S1, CYP27C1	CYP26B1, RDH5, DHRS3, RETSAT, ALDH1A1, ALDH1A3
iMyoblast vs bMyo	KEGG	Down	hsa05321	Inflammatory bowel disease	25	4	6	0.0434795	0.00561653	0.42968	0.377431	GATA3, TGFB2, TLR4, IL18	RORA, IL21R, MAF, TGFB3, JUN, HLA-DMA
iMyoblast vs bMyo	KEGG	Down	hsa04512	ECM-receptor interaction	64	13	10	2.006e-05	0.00845587	0.00337008	0.413376	AGRN, COL4A5, COL4A1, COL4A2, SPP1, COL4A6, THBS1, ITGA4, LAMB3, SV2A, LAMC2, ITGA2, RELN	ITGA7, LAMA2, ITGB7, COL6A2, COL6A1, COL1A2, COL6A3, CD47, ITGA10, LAMA3
iMyoblast vs bMyo	KEGG	Down	hsa00471	D-Glutamine and D-glutamate metabolism	3	0	2	1	0.0095355	1	0.413376		GLS, DGLUCY
iMyoblast vs bMyo	KEGG	Down	hsa05416	Viral myocarditis	40	1	7	0.865206	0.00984228	1	0.413376	RAC3	LAMA2, SGCA, SGCD, ABL1, HLA-F, HLA-A, HLA-DMA
iMyoblast vs bMyo	KEGG	Down	hsa04974	Protein digestion and absorption	48	6	8	0.0363273	0.0115114	0.369878	0.413986	COL4A5, COL4A1, COL4A2, COL4A6, COL13A1, COL11A1	ELN, KCNN4, COL6A2, COL6A1, COL1A2, COL6A3, SLC1A1, COL7A1
iMyoblast vs bMyo	KEGG	Down	hsa05150	Staphylococcus aureus infection	19	3	5	0.111984	0.013517	0.732835	0.413986	KRT18, KRT19, KRT15	C1R, FPR1, C1S, HLA-DMA, KRT17
iMyoblast vs bMyo	KEGG	Down	hsa04060	Cytokine-cytokine receptor interaction	116	7	16	0.572102	0.015061	1	0.413986	TGFB2, IL27RA, TNFRSF10D, IL18, TNFSF15, GDF6, TNFRSF21	TNFRSF1B, LTBR, CSF1, IL1R1, CSF3, IL13RA2, IL21R, TNFRSF14, CCL28, TGFB3, TSLP, BMP7, TNFSF9, BMP4, IL33, CCL26
iMyoblast vs bMyo	KEGG	Down	hsa04934	Cushing syndrome	113	6	14	0.543658	0.0153304	1	0.413986	TCF7L1, FZD2, SCARB1, ORAI1, PLCB2, CREB5	FZD1, CDKN2C, RASD1, WNT7B, NR4A1, TCF7, ITPR3, WNT9A, ADCY7, CAMK2A, AXIN2, CAMK2D, CREB3L4, PBX1
iMyoblast vs bMyo	KEGG	Down	hsa04080	Neuroactive ligand-receptor interaction	95	8	14	0.266531	0.0193389	0.892873	0.413986	F2RL2, OXTR, PTGIR, EDN1, S1PR1, GAL, TBXA2R, F2R	ADRA2C, PTGFR, FPR1, NPB, EDNRB, GABRB2, PTGER2, PENK, SCT, GABRE, NPY, ADRA2A, CHRNA1, P2RY6
iMyoblast vs bMyo	KEGG	Down	hsa04514	Cell adhesion molecules	86	13	12	0.00117559	0.0206868	0.0426746	0.413986	ESAM, NRXN3, CDH4, CNTNAP1, PVR, CDH2, NLGN1, ITGA4, CLDN1, ALCAM, NEGR1, CNTN1, NCAM2	NRXN2, NFASC, NTNG1, ITGB7, CDH15, HLA-F, NCAM1, HLA-A, CLDN23, HLA-DMA, JAM2, NTNG2
iMyoblast vs bMyo	KEGG	Down	hsa04151	PI3K-Akt signaling pathway	257	26	25	0.00050126	0.0214945	0.0289661	0.413986	COL4A5, COL4A1, COL4A2, SPP1, COL4A6, GNGT2, FLT1, KITLG, CCND2, PDGFA, TEK, THBS1, ITGA4, LAMB3, PIK3R3, LAMC2, TLR4, BDNF, ITGA2, CREB5, FGF5, RELN, F2R, EPHA2, PDGFRB, JAK3	VEGFA, ITGA7, CSF1, FGF7, LAMA2, ITGB7, CSF3, COL6A2, COL6A1, INSR, PGF, NR4A1, IRS1, COL1A2, VEGFB, COL6A3, NTF3, FGFR2, FGF18, FGFR4, ITGA10, DDIT4, MET, CREB3L4, LAMA3
iMyoblast vs bMyo	KEGG	Down	hsa04010	MAPK signaling pathway	231	24	23	0.000684951	0.024245	0.0328777	0.413986	RAC3, CACNG8, MKNK2, FLT1, MAP3K11, KITLG, DUSP8, PDGFA, TEK, TGFB2, FLNB, MAPK12, DUSP4, MECOM, CACNA2D4, RASGRF1, BDNF, FGF5, MAP4K2, RELB, RRAS2, EPHA2, PDGFRB, CACNG6	VEGFA, CSF1, IL1R1, FGF7, INSR, PGF, NR4A1, CDC25B, RASA1, MAPKAPK3, TGFB3, VEGFB, JUN, MRAS, NTF3, FGFR2, FGF18, DUSP2, FGFR4, ARRB2, RPS6KA2, MET, HSPA2
iMyoblast vs bMyo	KEGG	Down	hsa05332	Graft-versus-host disease	10	0	3	1	0.0264244	1	0.413986		HLA-F, HLA-A, HLA-DMA
iMyoblast vs bMyo	KEGG	Down	hsa05330	Allograft rejection	10	0	3	1	0.0264863	1	0.413986		HLA-F, HLA-A, HLA-DMA
iMyoblast vs bMyo	KEGG	Down	hsa04925	Aldosterone synthesis and secretion	63	5	9	0.259816	0.0268628	0.892873	0.413986	CAMK1G, SCARB1, ORAI1, PLCB2, CREB5	ATP2B1, NR4A1, ITPR3, ADCY7, CAMK1D, CAMK2A, CAMK2D, CREB3L4, NR4A2
iMyoblast vs bMyo	KEGG	Down	hsa05205	Proteoglycans in cancer	174	12	17	0.116911	0.0277648	0.732835	0.413986	HBEGF, HCLS1, FZD2, THBS1, TGFB2, FLNB, MAPK12, PLCG2, PIK3R3, TLR4, ITGA2, RRAS2	MMP2, CD63, VEGFA, FZD1, WNT7B, TIMP3, ITPR3, WNT9A, HSPB2, CAMK2A, COL1A2, MRAS, CAV3, CAMK2D, MET, PLAU, ANK1

## Sheet: iMyoblast vs bMes
Supplementary file 2. Top 20 Up and Down GO terms (BP, CC, MF) and KEGG pathways for pairwise cell type comparisons. Terms comprising N (< 500) genes are sorted by P.Up and P.Down. For each term, the top Genes.Up and Genes.Down are listed.
Comparison	Ont	Dir	GO/KEGG ID	GO Term / KEGG Pathway (top 20 Up and Down)	N	Up	Down	P.Up	P.Down	FDR.Up	FDR.Down	Genes.Up (limited to a maximum of the top 30 Up genes)	Genes.Down (limited to a maximum of the top 30 Down genes)
iMyoblast vs bMes	BP	Up	GO:0048812	neuron projection morphogenesis	494	52	24	3.88856e-10	0.188679	7.89961e-06	1	AGRN, NEDD4L, LZTS1, ADGRB3, PTPRA, VCL, EIF2AK4, TUBB2B, GATA3, DICER1, EZR, COL25A1, APBB2, UCHL1, EFNB2, SHTN1, MYH10, STK26, VANGL2, BTBD3, CDH4, SYT1, STMN1, EPHA2, PLXNA2, TNIK, NEXN, CDH2, NOG, PPP1R9A	NFASC, DOK5, DOK1, NPTN, MAPK3, SHOX2, LAMA2, VEGFA, ABL1, LRP1, NTNG1, LAMA1, DVL1, SEMA7A, S100A6, GAS7, NPTX1, NGEF, NFIB, TSKU, ARC, NBL1, TRPV2, NFATC4
iMyoblast vs bMes	BP	Up	GO:0006935	chemotaxis	408	44	41	4.51728e-09	4.76296e-08	3.51963e-05	3.12128e-05	LYN, AGRN, PTPRA, MDK, TUBB2B, CDH13, GATA3, BCAR1, PDGFA, EZR, HOXB9, APBB2, EFNB2, MYH10, VANGL2, CDH4, EPHA2, PLXNA2, NEXN, GPSM3, HBEGF, ECSCR, S1PR1, STX3, NOG, CHN1, CYFIP2, SHC3, PLXND1, EPHB4	HSD3B7, NFASC, DOK5, PDGFRA, FGF7, DOK1, LGMN, ENPP2, NPTN, MAPK3, IL17RC, CXCL3, HGF, LAMA2, FGF18, EDNRB, VEGFA, GPNMB, IL6, CXCL2, ACKR3, CXCL5, CXCL1, LRP1, TYMP, NTNG1, LAMA1, DVL1, CCL2, SEMA7A
iMyoblast vs bMes	BP	Up	GO:0042330	taxis	410	44	41	5.19758e-09	5.4182e-08	3.51963e-05	3.43971e-05	LYN, AGRN, PTPRA, MDK, TUBB2B, CDH13, GATA3, BCAR1, PDGFA, EZR, HOXB9, APBB2, EFNB2, MYH10, VANGL2, CDH4, EPHA2, PLXNA2, NEXN, GPSM3, HBEGF, ECSCR, S1PR1, STX3, NOG, CHN1, CYFIP2, SHC3, PLXND1, EPHB4	HSD3B7, NFASC, DOK5, PDGFRA, FGF7, DOK1, LGMN, ENPP2, NPTN, MAPK3, IL17RC, CXCL3, HGF, LAMA2, FGF18, EDNRB, VEGFA, GPNMB, IL6, CXCL2, ACKR3, CXCL5, CXCL1, LRP1, TYMP, NTNG1, LAMA1, DVL1, CCL2, SEMA7A
iMyoblast vs bMes	BP	Up	GO:0061564	axon development	388	42	21	8.45199e-09	0.0984976	4.29255e-05	1	AGRN, PTPRA, VCL, TUBB2B, GATA3, PTPRF, EZR, COL25A1, APBB2, UCHL1, EFNB2, SHTN1, MYH10, VANGL2, CDH4, STMN1, EPHA2, TNFRSF21, PLXNA2, NEXN, CDH2, SCARF1, NOG, CHN1, CYFIP2, SPP1, MACF1, SHC3, PLXND1, EPHB4	KLF4, NFASC, DOK5, DOK1, NPTN, MAPK3, SHOX2, LAMA2, VEGFA, ABL1, LRP1, TSPAN2, NTNG1, LAMA1, DVL1, SEMA7A, S100A6, NPTX1, NFIB, TSKU, TRPV2
iMyoblast vs bMes	BP	Up	GO:0048667	cell morphogenesis involved in neuron differentiation	455	45	23	3.81444e-08	0.148342	0.000147485	1	AGRN, NEDD4L, LZTS1, ADGRB3, PTPRA, VCL, TUBB2B, GATA3, EZR, COL25A1, APBB2, UCHL1, EFNB2, SHTN1, MYH10, VANGL2, BTBD3, CDH4, STMN1, EPHA2, PLXNA2, TNIK, NEXN, CDH2, NOG, PPP1R9A, CHN1, CYFIP2, SPP1, MACF1	NFASC, DOK5, DOK1, NPTN, MAPK3, SHOX2, LAMA2, VEGFA, ABL1, LRP1, NTNG1, LAMA1, DVL1, SEMA7A, S100A6, NPTX1, NGEF, NFIB, TSKU, ARC, TRPV2, SLC1A3, NFATC4
iMyoblast vs bMes	BP	Up	GO:0048568	embryonic organ development	318	36	21	4.35593e-08	0.0167953	0.000147485	0.496647	KRT8, HOXB7, SOX11, HOXB6, HOXB5, TUBB2B, TEAD2, GATA3, HOXB4, HOXB8, FZD2, PDGFA, PHACTR4, DNAJB6, FBN2, HOXB3, VANGL2, EPHA2, SPINT2, TFAP2A, CITED2, CHD7, NOG, MDFI, NRK, NR2F2, SIX4, NOTCH1, FZD6, DLG1	OSR2, PDGFRA, MAPK3, SHOX2, INSIG1, PRRX1, SOBP, VEGFA, JUNB, FOXF2, TCF7, CEBPB, DVL1, MYF5, OSR1, PBX1, TSHZ1, ALDH1A3, FBN1, LRIG1, MSX1
iMyoblast vs bMes	BP	Up	GO:0007409	axonogenesis	355	38	19	8.34537e-08	0.121114	0.000197748	1	AGRN, PTPRA, VCL, TUBB2B, GATA3, EZR, COL25A1, APBB2, UCHL1, EFNB2, SHTN1, MYH10, VANGL2, CDH4, STMN1, EPHA2, PLXNA2, NEXN, CDH2, NOG, CHN1, CYFIP2, SPP1, MACF1, SHC3, PLXND1, EPHB4, NRXN3, ZSWIM6, NOTCH1	NFASC, DOK5, DOK1, NPTN, MAPK3, SHOX2, LAMA2, VEGFA, ABL1, LRP1, NTNG1, LAMA1, DVL1, SEMA7A, S100A6, NPTX1, NFIB, TSKU, TRPV2
iMyoblast vs bMes	BP	Up	GO:0048562	embryonic organ morphogenesis	202	27	17	8.76066e-08	0.00325765	0.000197748	0.19017	HOXB7, SOX11, HOXB6, HOXB5, TEAD2, GATA3, HOXB4, HOXB8, FZD2, PHACTR4, FBN2, HOXB3, VANGL2, EPHA2, TFAP2A, CHD7, NOG, MDFI, SIX4, NOTCH1, FZD6, DLG1, HOXB2, SMO, HOXA3, MFAP2, SALL1	OSR2, PDGFRA, MAPK3, SHOX2, INSIG1, PRRX1, SOBP, FOXF2, TCF7, DVL1, MYF5, OSR1, TSHZ1, ALDH1A3, FBN1, LRIG1, MSX1
iMyoblast vs bMes	BP	Up	GO:0007411	axon guidance	201	26	13	2.94265e-07	0.0621954	0.000543454	0.882948	AGRN, PTPRA, TUBB2B, GATA3, EZR, APBB2, EFNB2, MYH10, VANGL2, CDH4, EPHA2, PLXNA2, NEXN, NOG, CHN1, CYFIP2, SHC3, PLXND1, EPHB4, NRXN3, ZSWIM6, SEMA3D, SMO, SPTBN2, SEMA3A, RPS6KA5	NFASC, DOK5, DOK1, NPTN, MAPK3, LAMA2, VEGFA, LRP1, NTNG1, LAMA1, DVL1, SEMA7A, NFIB
iMyoblast vs bMes	BP	Up	GO:0097485	neuron projection guidance	202	26	13	3.24307e-07	0.0641367	0.000547592	0.90419	AGRN, PTPRA, TUBB2B, GATA3, EZR, APBB2, EFNB2, MYH10, VANGL2, CDH4, EPHA2, PLXNA2, NEXN, NOG, CHN1, CYFIP2, SHC3, PLXND1, EPHB4, NRXN3, ZSWIM6, SEMA3D, SMO, SPTBN2, SEMA3A, RPS6KA5	NFASC, DOK5, DOK1, NPTN, MAPK3, LAMA2, VEGFA, LRP1, NTNG1, LAMA1, DVL1, SEMA7A, NFIB
iMyoblast vs bMes	BP	Up	GO:0030155	regulation of cell adhesion	474	44	39	4.04326e-07	1.34801e-05	0.000547592	0.00408729	LYN, IGFBP2, RAC3, MDK, FAM49B, CDH13, GATA3, PAWR, JUP, ARHGDIB, GCNT2, EFNB2, NUAK1, EPHA2, TNFRSF21, SPINT2, PLXNA2, ADAM19, NCK2, ITGA3, PLEKHA2, ADAM9, CDK6, ITGA6, S1PR1, CITED2, STX3, ETS1, MACF1, PLXND1	ABI3BP, KLF4, BMP6, PLPP3, EGFLAM, LAMA2, LRRC32, LOXL3, CCDC80, COL16A1, HAS2, VEGFA, TNFRSF14, GPNMB, TNFSF9, ABL1, VIT, IL6, FSTL3, CD70, SPOCK1, CEBPB, LRP1, EMILIN2, LAMA1, CCL2, ADTRP, DDR2, COL1A1, LAMA4
iMyoblast vs bMes	BP	Up	GO:0022604	regulation of cell morphogenesis	382	38	15	5.03309e-07	0.560535	0.000639045	1	NEDD4L, LZTS1, ADGRB3, RAC3, FBLIM1, MDK, PLEKHO1, TUBB2B, PRAG1, RHOBTB3, EZR, SHTN1, MYH10, CDH4, SYT1, PLXNA2, TNIK, CDC42EP3, CDC42EP5, CDH2, MYH9, PPP1R9A, CHN1, SPP1, MACF1, PLXND1, FBLN1, RIMS2, EPB41, ZSWIM6	ENPP2, SHOX2, HAS2, VEGFA, ABL1, PARVB, LRP1, DVL1, CCL2, SEMA7A, NGEF, ATP10A, ARC, TRPV2, NFATC4
iMyoblast vs bMes	BP	Up	GO:0048598	embryonic morphogenesis	437	41	31	8.32503e-07	0.001356	0.000994841	0.105142	HOXB7, SOX11, AFF3, HOXB6, HOXB5, TEAD2, GATA3, HOXB4, LUZP1, HOXB8, FZD2, PHACTR4, TGIF2, DNAJB6, FBN2, HOXB3, VANGL2, COL4A2, EPHA2, SPINT2, TFAP2A, HMGA2, AR, PRKACB, TXNRD1, ITGA3, CHD7, NOG, MDFI, SIX4	MMP2, KLF4, OSR2, UGDH, COL6A1, PDGFRA, MAPK3, SHOX2, INSIG1, PRRX1, SOBP, FZD1, CACNA1C, GREM2, ABL1, FOXF2, TCF7, LMO4, DVL1, PRICKLE1, ITGB5, MYF5, OSR1, PBX1, TSHZ1, ALDH1A3, EYA2, FBN1, LRIG1, ITGB3
iMyoblast vs bMes	BP	Up	GO:0040017	positive regulation of locomotion	407	38	31	2.27386e-06	0.000402388	0.00230967	0.0464461	LYN, MDK, ANXA3, PLK2, TUBB2B, CDH13, GATA3, BCAR1, COL18A1, PDGFA, GCNT2, PIK3R3, SHTN1, ITGA3, GPSM3, HBEGF, ADAM9, ITGA6, S1PR1, STX3, ETS1, SH3RF2, NOTCH1, MYLK, FLT1, SEMA3D, DYSF, MCAM, THBS1, NOX4	TNFAIP6, XG, PLPP3, PDGFRA, FGF7, IL1R1, HMOX1, LGMN, ENPP2, MAPK3, HGF, FGF18, ADAMTS1, HAS2, VEGFA, TNFRSF14, GPNMB, ABL1, IL6, ACKR3, LRP1, SEMA7A, DDR2, COL1A1, PTP4A1, VEGFB, SPHK1, PYCARD, ITGB3, WISP1
iMyoblast vs bMes	BP	Up	GO:0002009	morphogenesis of an epithelium	425	39	20	2.45293e-06	0.245808	0.00234974	1	AP2B1, HOXB7, SOX11, MDK, VCL, TEAD2, GATA3, HOXB4, LUZP1, FZD2, PDGFA, PHACTR4, EFNB2, VANGL2, EPHA2, SPINT2, TFAP2A, DCHS1, AR, PRKACB, AJUBA, HBEGF, COL4A1, NOG, KLHL3, PLXND1, SIX4, NOTCH1, TGM2, FZD6	KLF4, FGF7, RASIP1, HGF, FZD1, VEGFA, CA2, ABL1, FOXF2, CTSZ, LMO4, LAMA1, DVL1, PRICKLE1, STAT1, OSR1, PBX1, ALDH1A3, CARMIL2, NFATC4
iMyoblast vs bMes	BP	Up	GO:0021675	nerve development	56	12	3	2.54463e-06	0.390268	0.00234974	1	DICER1, COL25A1, HOXB3, TFAP2A, CHD7, SIX4, HOXB2, ITGA4, HOXA3, SALL1, SEMA3A, ADARB1	NPTX1, LRIG1, SLC1A3
iMyoblast vs bMes	BP	Up	GO:0051272	positive regulation of cellular component movement	411	38	31	2.92559e-06	0.000479935	0.00237733	0.052702	LYN, MDK, ANXA3, PLK2, TUBB2B, CDH13, GATA3, BCAR1, COL18A1, PDGFA, GCNT2, PIK3R3, SHTN1, STMN1, ITGA3, GPSM3, HBEGF, ADAM9, ITGA6, S1PR1, ETS1, SH3RF2, NOTCH1, MYLK, FLT1, SEMA3D, DYSF, MCAM, THBS1, NOX4	TNFAIP6, XG, PLPP3, PDGFRA, FGF7, IL1R1, HMOX1, LGMN, ENPP2, MAPK3, HGF, FGF18, ADAMTS1, HAS2, VEGFA, TNFRSF14, GPNMB, ABL1, IL6, ACKR3, LRP1, SEMA7A, DDR2, COL1A1, PTP4A1, VEGFB, SPHK1, PYCARD, ITGB3, WISP1
iMyoblast vs bMes	BP	Up	GO:0048704	embryonic skeletal system morphogenesis	77	14	6	3.17503e-06	0.0892624	0.0024808	0.968678	HOXB7, SOX11, HOXB6, HOXB5, HOXB4, HOXB8, HOXB3, TFAP2A, NOG, MDFI, SIX4, DLG1, HOXB2, HOXA3	OSR2, PDGFRA, SHOX2, PRRX1, MYF5, OSR1
iMyoblast vs bMes	BP	Up	GO:0001763	morphogenesis of a branching structure	149	20	10	3.59092e-06	0.0756365	0.00266004	0.927311	HOXB7, MDK, PDGFA, VANGL2, COL13A1, EPHA2, SPINT2, DCHS1, AR, COL4A1, NOG, PLXND1, SIX4, NOTCH1, TGM2, DLG1, SMO, SALL1, SEMA3A, DDR1	FGF7, RASIP1, SHOX2, HGF, VEGFA, ABL1, CTSZ, LAMA1, PBX1, NFATC4
iMyoblast vs bMes	BP	Up	GO:0007156	homophilic cell adhesion via plasma membrane adhesion molecules	88	15	3	3.79725e-06	0.70085	0.00266004	1	ANXA3, FAT1, CDH13, PCDH10, ESAM, DSG2, CDH4, DCHS1, NEXN, PCDHA10, PCDHB2, CDH2, NECTIN2, CADM1, AMIGO2	NPTN, PCDHGA12, HMCN1
iMyoblast vs bMes	BP	Down	GO:0030198	extracellular matrix organization	269	28	55	6.46199e-06	1.62621e-24	0.00328189	1.33979e-20	AGRN, COL18A1, PDGFA, COL25A1, HAPLN1, APBB2, DNAJB6, FBN2, COL13A1, COL4A2, SPINT2, ADAM19, ITGA3, COL4A1, ITGA6, ETS1, SPP1, COL4A5, FBLN1, NOTCH1, LAMB3, THBS1, ITGA4, MFAP2, ANTXR1, COL4A6, DDR1, F11R	TNXB, ABI3BP, MMP2, ELN, MFAP5, TIMP1, COL6A1, PDGFRA, HAS1, COL6A2, COL6A3, ADAMTS2, EGFLAM, CTSL, LAMA2, COL22A1, LOXL3, KAZALD1, CTSK, CCDC80, BGN, COL9A3, COL16A1, COL1A2, HAS2, ADAMTS5, ADAM12, MMP3, ABL1, VIT
iMyoblast vs bMes	BP	Down	GO:0043062	extracellular structure organization	270	28	55	6.95036e-06	1.97852e-24	0.00341239	1.33979e-20	AGRN, COL18A1, PDGFA, COL25A1, HAPLN1, APBB2, DNAJB6, FBN2, COL13A1, COL4A2, SPINT2, ADAM19, ITGA3, COL4A1, ITGA6, ETS1, SPP1, COL4A5, FBLN1, NOTCH1, LAMB3, THBS1, ITGA4, MFAP2, ANTXR1, COL4A6, DDR1, F11R	TNXB, ABI3BP, MMP2, ELN, MFAP5, TIMP1, COL6A1, PDGFRA, HAS1, COL6A2, COL6A3, ADAMTS2, EGFLAM, CTSL, LAMA2, COL22A1, LOXL3, KAZALD1, CTSK, CCDC80, BGN, COL9A3, COL16A1, COL1A2, HAS2, ADAMTS5, ADAM12, MMP3, ABL1, VIT
iMyoblast vs bMes	BP	Down	GO:0048514	blood vessel morphogenesis	454	39	49	1.33457e-05	1.25281e-10	0.00531603	2.31371e-07	ADGRB3, MDK, ANXA3, PLK2, CDH13, TEAD2, COL18A1, JUP, PDGFA, TIE1, PIK3R3, EFNB2, HOXB3, COL4A2, EPHA2, EGFL7, HMGA2, ECSCR, CDH2, COL4A1, S1PR1, CHD7, MYH9, NOG, ETS1, NR2F2, PLXND1, EPHB4, NOTCH1, MYLK	MMP2, KLF4, MEOX2, TGFBR3, RNH1, PDGFRA, ANPEP, HMOX1, RORA, ENPP2, RASIP1, PRRX1, HGF, FGF18, HAS2, HSPB6, JAK1, ADAM12, VEGFA, GPNMB, ABL1, JUNB, IL6, ACKR3, FAP, LRP1, NOTCH3, TYMP, DCN, ESM1
iMyoblast vs bMes	BP	Down	GO:0006954	inflammatory response	396	22	44	0.106688	5.63507e-10	1	7.63176e-07	LYN, MGST2, MDK, GATA3, NLRP1, CYBA, POLB, EPHA2, GPSM3, ETS1, SPP1, GPS2, GAL, NOTCH1, TGM2, SNCA, THBS1, NOX4, SMO, TMSB4X, RPS6KA5, F11R	NUPR1, PTGS1, METRNL, KLF4, NR1D1, TNFAIP6, BMP6, TIMP1, PTGES, IL1R1, HMOX1, RORA, IL17RC, CXCL3, HGF, LOXL3, EDNRB, TSLP, PTGER2, BACE2, MMP3, IL6, IL1RL1, CXCL2, CXCL5, CXCL1, CEBPB, LRP1, IL33, TSPAN2
iMyoblast vs bMes	BP	Down	GO:0001525	angiogenesis	378	31	42	0.000238898	1.14662e-09	0.0397805	1.37022e-06	ADGRB3, MDK, ANXA3, PLK2, CDH13, COL18A1, JUP, PDGFA, TIE1, PIK3R3, EFNB2, HOXB3, COL4A2, EPHA2, EGFL7, HMGA2, ECSCR, COL4A1, S1PR1, MYH9, ETS1, PLXND1, EPHB4, NOTCH1, FLT1, DYSF, MCAM, THBS1, JCAD, HOXA3	MMP2, KLF4, MEOX2, RNH1, PDGFRA, ANPEP, HMOX1, RORA, ENPP2, RASIP1, HGF, FGF18, HSPB6, JAK1, ADAM12, VEGFA, GPNMB, ABL1, IL6, ACKR3, FAP, NOTCH3, TYMP, DCN, ESM1, TMEM100, CCL2, ADTRP, STAT1, EGR3
iMyoblast vs bMes	BP	Down	GO:0009617	response to bacterium	318	21	37	0.0252369	3.53195e-09	0.664679	3.9862e-06	LYN, PLAC8, MGST2, ANXA3, ROMO1, PLCG2, ANKRD1, NLRP1, CYBA, EPHA2, NEXN, ADAM9, CARD8, CHD7, NOTCH1, SNCA, OCIAD2, CLDN1, CD274, IL27RA, SCARB1	MGST1, NR1D1, BMP6, PTGES, PENK, MAPK3, CXCL3, IRAK3, MR1, EDNRB, CCDC80, ADAMTS5, PTGER2, TNFRSF14, ABL1, JUNB, IL6, ZFP36, CXCL2, IFI44, CXCL5, CXCL1, CEBPB, DCN, CCL2, SSC5D, CASP1, MAPKAPK3, CARD16, NFIB
iMyoblast vs bMes	BP	Down	GO:0050900	leukocyte migration	250	19	32	0.00823619	4.78538e-09	0.357517	5.11658e-06	LYN, MDK, GATA3, ESAM, ITGA3, GPSM3, ITGA6, S1PR1, MYH9, SLC7A11, GYPC, FLT1, DYSF, THBS1, TNFRSF10B, ITGA4, IL27RA, F11R, TNFRSF10D	HSD3B7, XG, PLCB1, IL1R1, HMOX1, LGMN, MAPK3, IL17RC, CXCL3, EDNRB, COL1A2, VEGFA, TNFRSF14, IL6, CXCL2, CXCL5, CXCL1, IL33, CCL2, ADTRP, COL1A1, CKLF, CXCL6, VEGFB, PF4, CCL28, PYCARD, ITGB3, NBL1, EMILIN1
iMyoblast vs bMes	BP	Down	GO:0060326	cell chemotaxis	162	13	25	0.017884	6.03698e-09	0.541452	5.84006e-06	LYN, MDK, BCAR1, HOXB9, EPHA2, GPSM3, HBEGF, S1PR1, NOTCH1, FLT1, DYSF, THBS1, TMSB4X	HSD3B7, PDGFRA, LGMN, MAPK3, IL17RC, CXCL3, HGF, FGF18, EDNRB, VEGFA, IL6, CXCL2, ACKR3, CXCL5, CXCL1, CCL2, CKLF, EGR3, CXCL6, VEGFB, PF4, NR4A1, CCL28, NBL1, CH25H
iMyoblast vs bMes	BP	Down	GO:0002237	response to molecule of bacterial origin	203	11	28	0.225349	8.90272e-09	1	7.86343e-06	LYN, MGST2, PLCG2, ANKRD1, ADAM9, CARD8, NOTCH1, SNCA, CLDN1, CD274, SCARB1	MGST1, NR1D1, BMP6, PTGES, PENK, MAPK3, CXCL3, IRAK3, EDNRB, PTGER2, ABL1, JUNB, IL6, ZFP36, CXCL2, CXCL5, CXCL1, CEBPB, DCN, CCL2, SSC5D, CASP1, MAPKAPK3, CARD16, CXCL6, PF4, PYCARD, PLSCR4
iMyoblast vs bMes	BP	Down	GO:0097529	myeloid leukocyte migration	109	5	20	0.478763	1.01383e-08	1	8.58167e-06	LYN, MDK, FLT1, DYSF, THBS1	XG, PLCB1, IL1R1, LGMN, MAPK3, IL17RC, CXCL3, EDNRB, VEGFA, IL6, CXCL2, CXCL5, CXCL1, CCL2, CKLF, CXCL6, VEGFB, PF4, NBL1, EMILIN1
iMyoblast vs bMes	BP	Down	GO:0022617	extracellular matrix disassembly	53	2	14	0.647898	1.11943e-08	1	9.09652e-06	ETS1, DDR1	MMP2, TIMP1, CTSL, CTSK, ADAMTS5, MMP3, IL6, SCUBE3, FAP, HTRA1, LRP1, DDR2, ADAMTS4, CARMIL2
iMyoblast vs bMes	BP	Down	GO:0032496	response to lipopolysaccharide	197	11	27	0.198465	2.00146e-08	1	1.50591e-05	LYN, MGST2, PLCG2, ANKRD1, ADAM9, CARD8, NOTCH1, SNCA, CLDN1, CD274, SCARB1	MGST1, NR1D1, BMP6, PTGES, PENK, MAPK3, CXCL3, IRAK3, EDNRB, PTGER2, ABL1, JUNB, IL6, ZFP36, CXCL2, CXCL5, CXCL1, CEBPB, DCN, CCL2, CASP1, MAPKAPK3, CARD16, CXCL6, PF4, PYCARD, PLSCR4
iMyoblast vs bMes	BP	Down	GO:0006935	chemotaxis	408	44	41	4.51728e-09	4.76296e-08	3.51963e-05	3.12128e-05	LYN, AGRN, PTPRA, MDK, TUBB2B, CDH13, GATA3, BCAR1, PDGFA, EZR, HOXB9, APBB2, EFNB2, MYH10, VANGL2, CDH4, EPHA2, PLXNA2, NEXN, GPSM3, HBEGF, ECSCR, S1PR1, STX3, NOG, CHN1, CYFIP2, SHC3, PLXND1, EPHB4	HSD3B7, NFASC, DOK5, PDGFRA, FGF7, DOK1, LGMN, ENPP2, NPTN, MAPK3, IL17RC, CXCL3, HGF, LAMA2, FGF18, EDNRB, VEGFA, GPNMB, IL6, CXCL2, ACKR3, CXCL5, CXCL1, LRP1, TYMP, NTNG1, LAMA1, DVL1, CCL2, SEMA7A
iMyoblast vs bMes	BP	Down	GO:0042330	taxis	410	44	41	5.19758e-09	5.4182e-08	3.51963e-05	3.43971e-05	LYN, AGRN, PTPRA, MDK, TUBB2B, CDH13, GATA3, BCAR1, PDGFA, EZR, HOXB9, APBB2, EFNB2, MYH10, VANGL2, CDH4, EPHA2, PLXNA2, NEXN, GPSM3, HBEGF, ECSCR, S1PR1, STX3, NOG, CHN1, CYFIP2, SHC3, PLXND1, EPHB4	HSD3B7, NFASC, DOK5, PDGFRA, FGF7, DOK1, LGMN, ENPP2, NPTN, MAPK3, IL17RC, CXCL3, HGF, LAMA2, FGF18, EDNRB, VEGFA, GPNMB, IL6, CXCL2, ACKR3, CXCL5, CXCL1, LRP1, TYMP, NTNG1, LAMA1, DVL1, CCL2, SEMA7A
iMyoblast vs bMes	BP	Down	GO:0001503	ossification	297	17	33	0.109504	8.63907e-08	1	5.31826e-05	SOX11, MDK, SORT1, FBN2, COL13A1, EPHA2, TFAP2A, DCHS1, CDK6, S1PR1, NOG, SPP1, CHRDL1, TUFT1, NOTCH1, SUCO, SMO	MMP2, OSR2, BMP6, COL6A1, PENK, ANKH, MAPK3, SHOX2, HGF, FGF18, KAZALD1, CTSK, FZD1, COL1A2, GPNMB, JUNB, IL6, FSTL3, XYLT1, CEBPB, SEMA7A, DDR2, COL1A1, MYF5, OSR1, COMP, PBX1, WISP1, NAB2, SMOC1
iMyoblast vs bMes	BP	Down	GO:0051216	cartilage development	161	5	23	0.8088	1.14708e-07	1	6.8538e-05	MDK, HOXB3, HMGA2, NOG, HOXA3	OSR2, BMP6, TIMP1, COL6A1, COL6A2, COL6A3, MAPK3, SHOX2, PRRX1, FGF18, CTSK, VIT, COL1A1, MYF5, OSR1, SCARA3, NFIB, COMP, WISP1, MSX1, LTBP3, TRPS1, TGFBI
iMyoblast vs bMes	BP	Down	GO:0061448	connective tissue development	214	7	27	0.794944	1.22795e-07	1	7.1274e-05	MDK, HOXB3, HMGA2, SERPINB7, NOG, NOTCH1, HOXA3	OSR2, BMP6, TIMP1, COL6A1, COL6A2, COL6A3, MAPK3, SHOX2, PRRX1, FGF18, CTSK, VIT, COL1A1, EGR1, SELENOM, MYF5, EBF2, OSR1, SCARA3, NFIB, COMP, DGAT2, WISP1, MSX1, LTBP3, TRPS1, TGFBI
iMyoblast vs bMes	BP	Down	GO:0060349	bone morphogenesis	86	2	16	0.879331	2.52631e-07	1	0.000135058	COL13A1, TFAP2A	OSR2, BMP6, COL6A1, COL6A2, COL6A3, SHOX2, INSIG1, FGF18, HAS2, VIT, COL1A1, SCARA3, COMP, MSX1, NAB2, LTBP3
iMyoblast vs bMes	BP	Down	GO:0071222	cellular response to lipopolysaccharide	122	6	19	0.396269	3.38891e-07	1	0.000176527	LYN, ANKRD1, ADAM9, CARD8, CD274, SCARB1	NR1D1, BMP6, MAPK3, CXCL3, EDNRB, ABL1, IL6, ZFP36, CXCL2, CXCL5, CXCL1, CEBPB, CCL2, CASP1, CARD16, CXCL6, PF4, PYCARD, PLSCR4
iMyoblast vs bMes	BP	Down	GO:0030595	leukocyte chemotaxis	111	7	18	0.179691	3.80635e-07	1	0.000193315	LYN, MDK, GPSM3, S1PR1, FLT1, DYSF, THBS1	HSD3B7, LGMN, MAPK3, IL17RC, CXCL3, EDNRB, VEGFA, IL6, CXCL2, CXCL5, CXCL1, CCL2, CKLF, CXCL6, VEGFB, PF4, NBL1, CH25H
iMyoblast vs bMes	CC	Up	GO:0016324	apical plasma membrane	181	25	7	1.41616e-07	0.596505	0.000287692	1	IGFBP2, LZTS1, FAT1, OXTR, EZR, DSG2, STK26, CYBA, VANGL2, SHROOM2, TNIK, SLC9A3R2, PARD6G, CDH2, STX3, MPDZ, NOTCH1, FZD6, SLC29A4, DLG1, NOX4, CNKSR3, SPTBN2, CLDN1, SAPCD2	NAALADL1, SLC1A1, KCNK2, KCNE4, DDR2, SLC39A4, KCNK1
iMyoblast vs bMes	CC	Up	GO:0005911	cell-cell junction	302	33	10	3.74403e-07	0.771547	0.000547592	1	KRT8, CNN2, FAT1, VCL, JUP, CCDC85C, ESAM, DSG2, VANGL2, SHROOM2, COL13A1, EPHA2, AJUBA, FRMD4A, PARD6G, CDH2, NECTIN2, STX3, WNK3, SV2A, MPDZ, KIFC3, NOTCH1, CADM1, GJC1, DLG1, CADM4, JCAD, KAZN, CLDN1	LSR, CLMP, NFASC, PLPP3, RASIP1, PMP22, STEAP1, MXRA8, PCDHGA12, LAMA1
iMyoblast vs bMes	CC	Up	GO:0032432	actin filament bundle	67	14	2	3.93614e-07	0.744052	0.000547592	1	FBLIM1, CNN2, SEPT11, LPP, MYH10, CYBA, VANGL2, MYL9, MYH9, MYLK, TPM1, NOX4, PLS1, PLS3	PDLIM4, CRYAB
iMyoblast vs bMes	CC	Up	GO:0045177	apical part of cell	229	27	13	1.07845e-06	0.131529	0.00121715	1	IGFBP2, LZTS1, FAT1, OXTR, EZR, DSG2, STK26, CYBA, VANGL2, SHROOM2, DCHS1, TNIK, SLC9A3R2, PARD6G, CDH2, STX3, MPDZ, MYO6, NOTCH1, FZD6, SLC29A4, DLG1, NOX4, CNKSR3, SPTBN2, CLDN1, SAPCD2	MGST1, NAALADL1, SLC1A1, LGMN, KCNK2, CA2, MYO1B, FAP, LRP1, KCNE4, DDR2, SLC39A4, KCNK1
iMyoblast vs bMes	CC	Up	GO:0005925	focal adhesion	385	36	15	2.07595e-06	0.520864	0.00221962	1	FBLIM1, CNN2, FAT1, VCL, CDH13, PRAG1, BCAR1, FZD2, JUP, CBL, GIT1, EZR, EFNB2, LPP, CSRP2, CYBA, MTF2, EPHA2, TNS3, AJUBA, NEXN, ITGA3, SLC9A3R2, ZNF185, ADAM9, CDH2, ITGA6, NECTIN2, MYH9, DST	ITGBL1, NFASC, MAPK3, FZD1, JAK1, PARVB, FAP, LRP1, ITGB5, DDR2, ADGRE5, CD59, APBB1IP, ITGB3, FBLN7
iMyoblast vs bMes	CC	Up	GO:0005587	collagen type IV trimer	4	4	0	2.77577e-06	1	0.00237733	1	COL4A2, COL4A1, COL4A5, COL4A6
iMyoblast vs bMes	CC	Up	GO:0030055	cell-substrate junction	390	36	15	2.8146e-06	0.541758	0.00237733	1	FBLIM1, CNN2, FAT1, VCL, CDH13, PRAG1, BCAR1, FZD2, JUP, CBL, GIT1, EZR, EFNB2, LPP, CSRP2, CYBA, MTF2, EPHA2, TNS3, AJUBA, NEXN, ITGA3, SLC9A3R2, ZNF185, ADAM9, CDH2, ITGA6, NECTIN2, MYH9, DST	ITGBL1, NFASC, MAPK3, FZD1, JAK1, PARVB, FAP, LRP1, ITGB5, DDR2, ADGRE5, CD59, APBB1IP, ITGB3, FBLN7
iMyoblast vs bMes	CC	Up	GO:0001725	stress fiber	61	12	1	5.21921e-06	0.913056	0.00291227	1	FBLIM1, CNN2, SEPT11, LPP, MYH10, CYBA, VANGL2, MYL9, MYH9, MYLK, TPM1, NOX4	PDLIM4
iMyoblast vs bMes	CC	Up	GO:0097517	contractile actin filament bundle	61	12	1	5.21921e-06	0.913056	0.00291227	1	FBLIM1, CNN2, SEPT11, LPP, MYH10, CYBA, VANGL2, MYL9, MYH9, MYLK, TPM1, NOX4	PDLIM4
iMyoblast vs bMes	CC	Up	GO:0098642	network-forming collagen trimer	5	4	0	1.30227e-05	1	0.00531603	1	COL4A2, COL4A1, COL4A5, COL4A6
iMyoblast vs bMes	CC	Up	GO:0098645	collagen network	5	4	0	1.30227e-05	1	0.00531603	1	COL4A2, COL4A1, COL4A5, COL4A6
iMyoblast vs bMes	CC	Up	GO:0098651	basement membrane collagen trimer	5	4	0	1.30227e-05	1	0.00531603	1	COL4A2, COL4A1, COL4A5, COL4A6
iMyoblast vs bMes	CC	Up	GO:0031252	cell leading edge	332	31	14	1.79298e-05	0.440956	0.00679924	1	IGF2BP1, RAC3, FAT1, PLEKHO1, BCAR1, AAK1, EZR, ABI3, PHACTR4, APBB2, SHTN1, MYH10, EPHA2, AJUBA, CDH2, CDK6, MYH9, STX3, PPP1R9A, MACF1, PLXND1, MYO6, MYLK, FGD6, DST, TPM1, DYSF, CADM4, JCAD, ANTXR1	PDLIM4, ABL1, SNX9, PARVB, LMO4, FAP, S100A6, KCNC4, GRIA1, APBB1IP, ITGB3, CARMIL2, AMPH, RINL
iMyoblast vs bMes	CC	Up	GO:0005912	adherens junction	67	12	1	1.8408e-05	0.936253	0.00679924	1	VCL, JUP, ESAM, SHROOM2, AJUBA, FRMD4A, NECTIN2, WNK3, KIFC3, NOTCH1, DLG1, JCAD	PLPP3
iMyoblast vs bMes	CC	Up	GO:0042641	actomyosin	73	12	2	3.60431e-05	0.786652	0.0118099	1	FBLIM1, CNN2, SEPT11, LPP, MYH10, CYBA, VANGL2, MYL9, MYH9, MYLK, TPM1, NOX4	PDLIM4, STX1A
iMyoblast vs bMes	CC	Up	GO:0015629	actin cytoskeleton	415	35	16	4.24244e-05	0.572005	0.0130584	1	RAC3, FBLIM1, CNN2, VCL, PAWR, BCAR1, JUP, EZR, SEPT11, LPP, MYH10, CYBA, VANGL2, SHROOM2, HCLS1, GABARAP, TMOD3, CDC42EP3, ZNF185, CAP2, CDH2, MYL9, MYH9, PPP1R9A, MACF1, MYO6, MYLK, FLT1, SNCA, TPM1	PDLIM4, MYO1B, ABL1, SNX9, PARVB, NOTCH3, CRYAB, LSP1, GAS7, STX1A, DDR2, ARC, CARMIL2, AMPH, TMOD2, RINL
iMyoblast vs bMes	CC	Up	GO:0062023	collagen-containing extracellular matrix	254	25	52	4.74501e-05	2.38519e-23	0.0141757	1.21138e-19	AGRN, MDK, CDH13, COL18A1, COL25A1, HAPLN1, FBN2, COL13A1, COL4A2, EGFL7, ADAM19, CDH2, COL4A1, ITGA6, COL4A5, EDIL3, FBLN1, DST, TGM2, LAMB3, DLG1, THBS1, LTBP4, MFAP2, COL4A6	TNXB, PRG4, ABI3BP, MMP2, ELN, MFAP5, TIMP1, COL6A1, TIMP3, COL6A2, COL6A3, ADAMTS2, EGFLAM, CTSL, PCOLCE, LAMA2, KAZALD1, ADAMTS1, CCDC80, BGN, S100A4, COL9A3, COL16A1, COL1A2, ADAMTS5, VIT, LTBP1, LTBP2, CTSZ, HTRA1
iMyoblast vs bMes	CC	Up	GO:0030027	lamellipodium	170	19	6	6.54081e-05	0.66065	0.0184551	1	IGF2BP1, RAC3, FAT1, BCAR1, ABI3, PHACTR4, APBB2, SHTN1, MYH10, EPHA2, AJUBA, CDH2, STX3, PPP1R9A, PLXND1, MYLK, FGD6, DYSF, ANTXR1	PDLIM4, PARVB, FAP, APBB1IP, ITGB3, CARMIL2
iMyoblast vs bMes	CC	Up	GO:0043296	apical junction complex	113	15	3	7.20437e-05	0.838633	0.0200257	1	JUP, CCDC85C, ESAM, SHROOM2, FRMD4A, PARD6G, NECTIN2, WNK3, MPDZ, KIFC3, DLG1, CLDN1, DLG3, SAPCD2, F11R	CLMP, PMP22, MXRA8
iMyoblast vs bMes	CC	Up	GO:0005604	basement membrane	72	11	12	0.000161896	2.29056e-05	0.0337713	0.00581658	AGRN, COL18A1, COL4A2, COL4A1, ITGA6, COL4A5, FBLN1, DST, LAMB3, DLG1, COL4A6	TIMP1, TIMP3, EGFLAM, LAMA2, ADAMTS1, CCDC80, LAMA1, LAMA4, HMCN1, FBN1, SMOC1, TGFBI
iMyoblast vs bMes	CC	Down	GO:0031012	extracellular matrix	310	26	64	0.000491483	1.1564e-28	0.0640031	2.34922e-24	AGRN, MDK, CDH13, COL18A1, COL25A1, HAPLN1, FBN2, COL13A1, COL4A2, LRRC17, EGFL7, ADAM19, CDH2, COL4A1, ITGA6, COL4A5, EDIL3, FBLN1, DST, TGM2, LAMB3, DLG1, THBS1, LTBP4, MFAP2, COL4A6	TNXB, PRG4, ABI3BP, MMP2, ELN, MFAP5, TIMP1, TGFBR3, COL6A1, VASN, TIMP3, COL6A2, COL6A3, ADAMTS2, EGFLAM, CTSL, PCOLCE, LAMA2, LRRC32, COL22A1, KAZALD1, ADAMTS1, CCDC80, BGN, S100A4, COL9A3, COL16A1, COL1A2, ADAMTS5, VEGFA
iMyoblast vs bMes	CC	Down	GO:0062023	collagen-containing extracellular matrix	254	25	52	4.74501e-05	2.38519e-23	0.0141757	1.21138e-19	AGRN, MDK, CDH13, COL18A1, COL25A1, HAPLN1, FBN2, COL13A1, COL4A2, EGFL7, ADAM19, CDH2, COL4A1, ITGA6, COL4A5, EDIL3, FBLN1, DST, TGM2, LAMB3, DLG1, THBS1, LTBP4, MFAP2, COL4A6	TNXB, PRG4, ABI3BP, MMP2, ELN, MFAP5, TIMP1, COL6A1, TIMP3, COL6A2, COL6A3, ADAMTS2, EGFLAM, CTSL, PCOLCE, LAMA2, KAZALD1, ADAMTS1, CCDC80, BGN, S100A4, COL9A3, COL16A1, COL1A2, ADAMTS5, VIT, LTBP1, LTBP2, CTSZ, HTRA1
iMyoblast vs bMes	CC	Down	GO:0005581	collagen trimer	51	8	14	0.00114189	7.67985e-09	0.113159	7.09164e-06	COL18A1, COL25A1, COL13A1, COL4A2, COL4A1, C1QTNF6, COL4A5, COL4A6	COL6A1, COL6A2, COL6A3, COL22A1, COL9A3, COL16A1, COL1A2, EMILIN2, DCN, COL1A1, SCARA3, COLEC12, COL5A3, EMILIN1
iMyoblast vs bMes	CC	Down	GO:0005788	endoplasmic reticulum lumen	229	15	29	0.0495537	2.5061e-08	0.764459	1.81826e-05	TSPAN14, COL18A1, PDGFA, COL25A1, TMEM132A, COL13A1, COL4A2, CDH2, COL4A1, SPP1, COL4A5, CHRDL1, TOR4A, THBS1, COL4A6	RCN3, TIMP1, COL6A1, PENK, COL6A2, COL6A3, COL22A1, COL9A3, COL16A1, COL1A2, ADAMTS5, CERCAM, IL6, LTBP1, FSTL3, P4HA2, CES1, CTSZ, MXRA8, COL1A1, RDH5, GPX7, FBN1, COL5A3, ARSA, IGFBP3, APOL1, FAM20C, TOR1B
iMyoblast vs bMes	CC	Down	GO:0009986	cell surface	444	32	39	0.00172889	3.09452e-06	0.136133	0.00118614	TSPAN14, CDH13, FCGRT, SORT1, TMEM123, PDGFA, DSG2, CDH4, EPHA2, EGFL7, SMIM1, ITGA3, HBEGF, ADAM9, CDH2, ITGA6, S1PR1, NECTIN2, SLC7A11, NOTCH1, FZD6, MCAM, THBS1, TNFRSF10B, ITGA4, ANTXR1, MME, BTN2A2, CD274, IL27RA	ITGBL1, CLMP, TGFBR3, VASN, PDGFRA, IL1R1, ANPEP, IL13RA2, NPTN, IL17RC, LRRC32, MR1, KCNK2, FZD1, BGN, VEGFA, TNFRSF14, TPBG, IL1RL1, SCUBE3, ACKR3, CTSZ, FAP, CD248, MXRA8, NOTCH3, CRLF1, SEMA7A, CRYAB, ITGB5
iMyoblast vs bMes	CC	Down	GO:0005614	interstitial matrix	9	0	5	1	1.07213e-05	1	0.00351296		ABI3BP, EGFLAM, KAZALD1, CCDC80, VIT
iMyoblast vs bMes	CC	Down	GO:0005604	basement membrane	72	11	12	0.000161896	2.29056e-05	0.0337713	0.00581658	AGRN, COL18A1, COL4A2, COL4A1, ITGA6, COL4A5, FBLN1, DST, LAMB3, DLG1, COL4A6	TIMP1, TIMP3, EGFLAM, LAMA2, ADAMTS1, CCDC80, LAMA1, LAMA4, HMCN1, FBN1, SMOC1, TGFBI
iMyoblast vs bMes	CC	Down	GO:0005589	collagen type VI trimer	3	0	3	1	5.46402e-05	1	0.0108825		COL6A1, COL6A3, DCN
iMyoblast vs bMes	CC	Down	GO:0098647	collagen beaded filament	3	0	3	1	5.46402e-05	1	0.0108825		COL6A1, COL6A3, DCN
iMyoblast vs bMes	CC	Down	GO:0034705	potassium channel complex	38	0	8	1	0.000130181	1	0.0218564		KCNJ8, ABCC9, KCNK2, KCNN4, KCNE4, KCNC4, STX1A, KCNK1
iMyoblast vs bMes	CC	Down	GO:0034703	cation channel complex	99	2	13	0.928044	0.000190559	1	0.0293904	CACNG8, DLG3	KCNJ8, ABCC9, KCNK2, CACNA1C, KCNN4, PORCN, KCNE4, KCNC4, STX1A, GRIA1, KCNK1, GRIA3, GRIN2D
iMyoblast vs bMes	CC	Down	GO:0009897	external side of plasma membrane	145	13	16	0.00761717	0.000228957	0.337866	0.031858	CDH13, FCGRT, TMEM123, ITGA3, ADAM9, ITGA6, S1PR1, MCAM, THBS1, ANTXR1, BTN2A2, CD274, IL27RA	TGFBR3, PDGFRA, IL1R1, ANPEP, IL13RA2, MR1, TNFRSF14, IL1RL1, ACKR3, CD248, CRLF1, SEMA7A, SSC5D, CD59, HLA-F, ENOX1
iMyoblast vs bMes	CC	Down	GO:0036021	endolysosome lumen	4	0	3	1	0.000237271	1	0.032147		LGMN, CTSL, CTSK
iMyoblast vs bMes	CC	Down	GO:0071953	elastic fiber	4	1	3	0.158073	0.000255188	1	0.033637	FBLN1	ELN, FBLN5, MFAP4
iMyoblast vs bMes	CC	Down	GO:0001527	microfibril	10	2	4	0.0624349	0.000438828	0.886968	0.0496324	FBN2, MFAP2	MFAP5, LTBP1, FBN1, MFAP4
iMyoblast vs bMes	CC	Down	GO:0008076	voltage-gated potassium channel complex	35	0	7	1	0.000478432	1	0.052702		KCNJ8, KCNK2, KCNN4, KCNE4, KCNC4, STX1A, KCNK1
iMyoblast vs bMes	CC	Down	GO:0098797	plasma membrane protein complex	322	19	25	0.0839497	0.0013082	0.953528	0.102216	AP2B1, KRT8, LYN, CDH13, GNGT2, JUP, CBL, CYBA, CDH4, COL13A1, ITGA3, CACNG8, CDH2, ITGA6, GJC1, DLG1, NOX4, ITGA4, DLG3	ITGBL1, TGFBR3, KCNJ8, ABCC9, MR1, KCNK2, CACNA1C, IL6, KCNN4, PORCN, LRP1, KCNE4, KCNC4, ITGB5, STX1A, GRIA1, APBB1IP, IRS1, HLA-F, ITGB3, EMILIN1, GNG11, KCNK1, GRIA3, GRIN2D
iMyoblast vs bMes	CC	Down	GO:0005584	collagen type I trimer	2	0	2	1	0.00137461	1	0.105777		COL1A2, COL1A1
iMyoblast vs bMes	CC	Down	GO:0097169	AIM2 inflammasome complex	2	0	2	1	0.00155897	1	0.113514		CASP1, PYCARD
iMyoblast vs bMes	CC	Down	GO:0034702	ion channel complex	134	4	13	0.826943	0.0032775	1	0.190235	CACNG8, TTYH3, DLG1, DLG3	KCNJ8, ABCC9, KCNK2, CACNA1C, KCNN4, PORCN, KCNE4, KCNC4, STX1A, GRIA1, KCNK1, GRIA3, GRIN2D
iMyoblast vs bMes	MF	Up	GO:0003779	actin binding	345	37	8	7.9822e-08	0.964884	0.000197748	1	MARCKSL1, CNN2, VCL, PAWR, EZR, PHACTR4, SHTN1, MYH10, SHROOM2, HCLS1, CORO7, AJUBA, NEXN, TMOD3, ZNF185, CAP2, MYH9, PPP1R9A, MACF1, KLHL3, TMSB15A, EPB41, MYO6, MYLK, DST, SNCA, TPM1, SPTBN2, PSTPIP2, TMSB15B	PDLIM4, S100A4, MYO1B, ABL1, PARVB, LSP1, GAS7, TMOD2
iMyoblast vs bMes	MF	Up	GO:0005201	extracellular matrix structural constituent	113	17	31	3.72114e-06	3.80176e-18	0.00266004	1.54465e-14	AGRN, COL18A1, COL25A1, HAPLN1, FBN2, COL13A1, COL4A2, COL4A1, COL4A5, EDIL3, FBLN1, TUFT1, LAMB3, THBS1, LTBP4, MFAP2, COL4A6	TNXB, PRG4, ABI3BP, ELN, MFAP5, COL6A1, COL6A2, COL6A3, PCOLCE, LAMA2, COL22A1, BGN, COL9A3, COL16A1, COL1A2, LTBP1, LTBP2, TFPI2, EMILIN2, DCN, LAMA1, FBLN5, COL1A1, LAMA4, COMP, HMCN1, FBN1, COL5A3, EMILIN1, MFAP4
iMyoblast vs bMes	MF	Up	GO:0043236	laminin binding	24	7	1	3.23387e-05	0.614061	0.010978	1	AGRN, ITGA3, PLEKHA2, ADAM9, ITGA6, ADGRG6, THBS1	SSC5D
iMyoblast vs bMes	MF	Up	GO:0051015	actin filament binding	161	19	3	3.29638e-05	0.955675	0.010978	1	EZR, SHTN1, MYH10, SHROOM2, HCLS1, CORO7, AJUBA, NEXN, ZNF185, MYH9, PPP1R9A, MACF1, MYO6, TPM1, PSTPIP2, ANTXR1, PLS1, PLS3, TAGLN	MYO1B, ABL1, GAS7
iMyoblast vs bMes	MF	Up	GO:0050839	cell adhesion molecule binding	434	35	27	8.371e-05	0.0112421	0.0215262	0.396323	FNBP1L, LYN, KRT18, CNN2, VCL, CDH13, PTPRF, JUP, CBL, EZR, DSG2, SHTN1, CDH4, EPHA2, ITGA3, SLC9A3R2, TMOD3, ADAM9, CDH2, ITGA6, NECTIN2, MYH9, SPP1, MACF1, EDIL3, NRXN3, DST, DLG1, THBS1, LTBP4	TNXB, ITGBL1, NDRG1, VASN, NPTN, COL16A1, ADAMTS5, GPNMB, MYO1B, SNX9, FAP, NOTCH3, NTNG1, NRXN2, ESM1, SEMA7A, ITGB5, FBLN5, STAT1, COMP, HMCN1, FBN1, ITGB3, WISP1, EFHD2, EMILIN1, TGFBI
iMyoblast vs bMes	MF	Up	GO:0045294	alpha-catenin binding	8	4	0	0.000169815	1	0.0338612	1	VCL, JUP, AJUBA, CDH2
iMyoblast vs bMes	MF	Up	GO:0030169	low-density lipoprotein particle binding	8	4	1	0.000178349	0.27742	0.0338612	1	CDH13, SCARF1, THBS1, SCARB1	COLEC12
iMyoblast vs bMes	MF	Up	GO:0005198	structural molecule activity	489	37	34	0.000186091	0.000747624	0.034384	0.0690363	AGRN, KRT18, VCL, TUBB2B, COL18A1, JUP, COL25A1, HAPLN1, CSRP2, FBN2, COL13A1, COL4A2, NEXN, COL4A1, MYL9, TUBB2A, MACF1, KLHL3, COL4A5, EDIL3, TUBA1A, FBLN1, TUFT1, EPB41, DST, LAMB3, TPM1, DLG1, THBS1, LTBP4	TNXB, PRG4, ABI3BP, ELN, MFAP5, COL6A1, COL6A2, COL6A3, PCOLCE, LAMA2, COL22A1, BGN, COL9A3, COL16A1, COL1A2, HSPB6, LTBP1, LTBP2, TFPI2, EMILIN2, DCN, LAMA1, CRYAB, FBLN5, COL1A1, LAMA4, COMP, HMCN1, FBN1, COL5A3
iMyoblast vs bMes	MF	Up	GO:0030020	extracellular matrix structural constituent conferring tensile strength	31	7	8	0.000222571	2.09365e-05	0.0375664	0.0055237	COL18A1, COL25A1, COL13A1, COL4A2, COL4A1, COL4A5, COL4A6	COL6A1, COL6A2, COL6A3, COL9A3, COL16A1, COL1A2, COL1A1, COL5A3
iMyoblast vs bMes	MF	Up	GO:0038023	signaling receptor activity	465	36	39	0.000361918	1.52213e-05	0.051058	0.00435521	ADGRB3, PTPRA, SORT1, PTPRF, TMEM123, FZD2, OXTR, TIE1, EPHA2, PLXNA2, AR, S1PR1, NECTIN2, SCARF1, NR2F2, PLXND1, EPHB4, NRXN3, GAL, NOTCH1, FLT1, FZD6, PEAR1, ADGRG6, GPR162, TNFRSF10B, LTBP4, SMO, ITGA4, ANTXR1	ADGRL2, NR1D1, TGFBR3, PDGFRA, IL1R1, ANPEP, RORA, IL13RA2, ABCC9, IL17RC, MR1, EDNRB, ADRA2C, FZD1, PTGER2, TNFRSF14, LTBP1, IL1RL1, ACKR3, NPR3, LRP1, NOTCH3, NRXN2, CRLF1, AGTRAP, ITGB5, DDR2, GRIA1, ADGRE5, SIGMAR1
iMyoblast vs bMes	MF	Up	GO:0060089	molecular transducer activity	465	36	39	0.000361918	1.52213e-05	0.051058	0.00435521	ADGRB3, PTPRA, SORT1, PTPRF, TMEM123, FZD2, OXTR, TIE1, EPHA2, PLXNA2, AR, S1PR1, NECTIN2, SCARF1, NR2F2, PLXND1, EPHB4, NRXN3, GAL, NOTCH1, FLT1, FZD6, PEAR1, ADGRG6, GPR162, TNFRSF10B, LTBP4, SMO, ITGA4, ANTXR1	ADGRL2, NR1D1, TGFBR3, PDGFRA, IL1R1, ANPEP, RORA, IL13RA2, ABCC9, IL17RC, MR1, EDNRB, ADRA2C, FZD1, PTGER2, TNFRSF14, LTBP1, IL1RL1, ACKR3, NPR3, LRP1, NOTCH3, NRXN2, CRLF1, AGTRAP, ITGB5, DDR2, GRIA1, ADGRE5, SIGMAR1
iMyoblast vs bMes	MF	Up	GO:0050840	extracellular matrix binding	47	8	12	0.000548468	1.65955e-07	0.0692058	9.1118e-05	AGRN, ITGA3, PLEKHA2, ADAM9, ITGA6, SPP1, ADGRG6, THBS1	ELN, BGN, ADAMTS5, VEGFA, CD248, SPOCK1, DCN, SSC5D, ADGRG1, ITGB3, SMOC1, TGFBI
iMyoblast vs bMes	MF	Up	GO:0016717	oxidoreductase activity, acting on paired donors, with oxidation of a pair of donors resulting in the reduction of molecular oxygen to two molecules of water	5	3	0	0.000631232	1	0.0763302	1	SC5D, FADS2, FADS1
iMyoblast vs bMes	MF	Up	GO:0004672	protein kinase activity	480	35	15	0.000926624	0.870959	0.0980436	1	LYN, PLK2, CCNJL, EIF2AK4, PRAG1, AAK1, TIE1, STK26, NUAK1, EPHA2, STK33, PRKACB, TNIK, MAP3K11, CDK6, PRKAG2, NRK, WNK3, CAMK1G, CCNJ, CCNG1, EPHB4, MYLK, FLT1, CCND2, LTBP4, ICK, MAPK12, LATS2, MAP3K1	TGFBR3, PDGFRA, MAPK3, IRAK3, JAK1, ABL1, LTBP1, CAMKK1, RPS6KA2, CCL2, DDR2, MAPKAPK3, LRRK1, CAMK2D, FAM20C
iMyoblast vs bMes	MF	Up	GO:0001784	phosphotyrosine residue binding	31	6	4	0.00143223	0.0324671	0.129892	0.699687	CBL, PLCG2, PIK3R3, NCK2, SHC3, SHF	MAPK3, ABL1, IRS1, CBLB
iMyoblast vs bMes	MF	Up	GO:0000248	C-5 sterol desaturase activity	2	2	0	0.00157677	1	0.131167	1	SC5D, FADS1
iMyoblast vs bMes	MF	Up	GO:0070704	sterol desaturase activity	2	2	0	0.00157677	1	0.131167	1	SC5D, FADS1
iMyoblast vs bMes	MF	Up	GO:0032089	NACHT domain binding	2	2	0	0.00167338	1	0.134686	1	CARD8, TRIM16
iMyoblast vs bMes	MF	Up	GO:0017124	SH3 domain binding	108	12	5	0.00177824	0.436084	0.136607	1	LYN, BCAR1, CBL, ABI3, TP53BP2, CYBA, HCLS1, ADAM19, ADAM9, SH3BGRL, KHDRBS3, SH3BGRL2	ADAM12, ABL1, EFS, CBLB, PLSCR4
iMyoblast vs bMes	MF	Up	GO:0004888	transmembrane signaling receptor activity	345	27	29	0.00178995	0.00020225	0.136703	0.0303007	ADGRB3, PTPRA, SORT1, PTPRF, FZD2, OXTR, TIE1, EPHA2, PLXNA2, S1PR1, SCARF1, PLXND1, EPHB4, GAL, NOTCH1, FLT1, FZD6, ADGRG6, GPR162, LTBP4, SMO, ANTXR1, OPN3, SSTR1, DDR1, IL27RA, TNFRSF10D	ADGRL2, TGFBR3, PDGFRA, IL1R1, IL13RA2, ABCC9, IL17RC, MR1, EDNRB, ADRA2C, FZD1, PTGER2, TNFRSF14, LTBP1, IL1RL1, ACKR3, NPR3, NRXN2, CRLF1, AGTRAP, DDR2, GRIA1, ADGRE5, SIGMAR1, ADGRG1, SPHK1, GRIA3, GRIN2D, PPARG
iMyoblast vs bMes	MF	Down	GO:0005201	extracellular matrix structural constituent	113	17	31	3.72114e-06	3.80176e-18	0.00266004	1.54465e-14	AGRN, COL18A1, COL25A1, HAPLN1, FBN2, COL13A1, COL4A2, COL4A1, COL4A5, EDIL3, FBLN1, TUFT1, LAMB3, THBS1, LTBP4, MFAP2, COL4A6	TNXB, PRG4, ABI3BP, ELN, MFAP5, COL6A1, COL6A2, COL6A3, PCOLCE, LAMA2, COL22A1, BGN, COL9A3, COL16A1, COL1A2, LTBP1, LTBP2, TFPI2, EMILIN2, DCN, LAMA1, FBLN5, COL1A1, LAMA4, COMP, HMCN1, FBN1, COL5A3, EMILIN1, MFAP4
iMyoblast vs bMes	MF	Down	GO:0005539	glycosaminoglycan binding	130	9	29	0.0906346	1.81676e-14	0.985148	6.15125e-11	AGRN, MDK, PTPRF, COL25A1, HAPLN1, COL13A1, HBEGF, THBS1, LTBP4	TNXB, PCOLCE2, ABI3BP, TNFAIP6, TGFBR3, FGF7, EGFLAM, PCOLCE, ADAMTS1, CCDC80, BGN, GREM2, ADAMTS5, VEGFA, GPNMB, VIT, LTBP2, DCN, COMP, ADGRG1, CXCL6, VEGFB, PF4, FBN1, COL5A3, WISP1, FBLN7, LXN, NDNF
iMyoblast vs bMes	MF	Down	GO:0008201	heparin binding	96	6	24	0.206869	2.31626e-13	1	6.72213e-10	MDK, PTPRF, COL25A1, COL13A1, HBEGF, THBS1	TNXB, PCOLCE2, ABI3BP, TGFBR3, FGF7, PCOLCE, ADAMTS1, CCDC80, GREM2, ADAMTS5, VEGFA, GPNMB, LTBP2, COMP, ADGRG1, CXCL6, VEGFB, PF4, FBN1, COL5A3, WISP1, FBLN7, LXN, NDNF
iMyoblast vs bMes	MF	Down	GO:0048018	receptor ligand activity	200	9	32	0.472078	1.89128e-11	1	4.80268e-08	MDK, PDGFA, HBEGF, SPP1, GAL, SEMA3D, CMTM3, CMTM7, SEMA3A	METRNL, BMP6, TIMP1, PENK, FGF7, CXCL3, HGF, FGF18, TSLP, GREM2, VEGFA, GPNMB, TNFSF9, IL6, NENF, CXCL2, CXCL5, CD70, CXCL1, IL33, TYMP, CRLF1, CCL2, SEMA7A, FAM19A5, CKLF, CXCL6, VEGFB, PF4, CCL28
iMyoblast vs bMes	MF	Down	GO:0030546	signaling receptor activator activity	204	9	32	0.496049	3.2203e-11	1	7.26894e-08	MDK, PDGFA, HBEGF, SPP1, GAL, SEMA3D, CMTM3, CMTM7, SEMA3A	METRNL, BMP6, TIMP1, PENK, FGF7, CXCL3, HGF, FGF18, TSLP, GREM2, VEGFA, GPNMB, TNFSF9, IL6, NENF, CXCL2, CXCL5, CD70, CXCL1, IL33, TYMP, CRLF1, CCL2, SEMA7A, FAM19A5, CKLF, CXCL6, VEGFB, PF4, CCL28
iMyoblast vs bMes	MF	Down	GO:0042379	chemokine receptor binding	21	0	11	1	8.48878e-11	1	1.72449e-07		CXCL3, JAK1, CXCL2, CXCL5, CXCL1, CCL2, CKLF, STAT1, CXCL6, PF4, CCL28
iMyoblast vs bMes	MF	Down	GO:0005125	cytokine activity	87	3	20	0.718739	1.95713e-10	1	3.26609e-07	SPP1, CMTM3, CMTM7	BMP6, TIMP1, CXCL3, TSLP, GREM2, VEGFA, TNFSF9, IL6, CXCL2, CXCL5, CD70, CXCL1, IL33, CRLF1, CCL2, FAM19A5, CKLF, CXCL6, PF4, CCL28
iMyoblast vs bMes	MF	Down	GO:1901681	sulfur compound binding	162	7	27	0.50782	2.09004e-10	1	3.26609e-07	AGRN, MDK, PTPRF, COL25A1, COL13A1, HBEGF, THBS1	TNXB, PCOLCE2, ABI3BP, MGST1, PTGES, TGFBR3, FGF7, PCOLCE, ADAMTS1, CCDC80, GREM2, ADAMTS5, VEGFA, GPNMB, LTBP2, LRP1, COMP, ADGRG1, CXCL6, VEGFB, PF4, FBN1, COL5A3, WISP1, FBLN7, LXN, NDNF
iMyoblast vs bMes	MF	Down	GO:0030545	receptor regulator activity	225	12	32	0.243195	4.07856e-10	1	5.91829e-07	MDK, LYPD1, PDGFA, DKK3, LYPD6, HBEGF, SPP1, GAL, SEMA3D, CMTM3, CMTM7, SEMA3A	METRNL, BMP6, TIMP1, PENK, FGF7, CXCL3, HGF, FGF18, TSLP, GREM2, VEGFA, GPNMB, TNFSF9, IL6, NENF, CXCL2, CXCL5, CD70, CXCL1, IL33, TYMP, CRLF1, CCL2, SEMA7A, FAM19A5, CKLF, CXCL6, VEGFB, PF4, CCL28
iMyoblast vs bMes	MF	Down	GO:0008009	chemokine activity	15	0	9	1	1.07451e-09	1	1.36429e-06		CXCL3, CXCL2, CXCL5, CXCL1, CCL2, CKLF, CXCL6, PF4, CCL28
iMyoblast vs bMes	MF	Down	GO:0001968	fibronectin binding	23	5	10	0.00192764	5.08088e-09	0.144502	5.1609e-06	ITGA3, PLEKHA2, FBLN1, THBS1, ITGA4	CTSL, LOXL3, CTSK, CCDC80, VEGFA, FSTL3, IGFBP6, SSC5D, ITGB3, IGFBP3
iMyoblast vs bMes	MF	Down	GO:0005509	calcium ion binding	394	29	41	0.00207669	1.20797e-08	0.149307	9.43844e-06	AGRN, SLC25A24, ANXA3, FAT1, CDH13, PCDH10, CBL, DSG2, FBN2, CDH4, SYT1, EGFL7, DCHS1, PCDHA10, PCDHB2, CDH2, MYL9, MACF1, EDIL3, FBLN1, NOTCH1, DST, SNCA, DYSF, THBS1, LTBP4, SLC25A23, PLS1, PLS3	RCN3, PLA2G4A, MASP1, NAALADL1, PAMR1, PLCB1, SNED1, ENPP2, MGMT, EGFLAM, C1S, S100A4, EPDR1, LTBP1, LTBP2, CRACR2A, SCUBE3, CD248, SPOCK1, LRP1, NOTCH3, PCDHGA12, S100A6, C1R, FBLN5, ADGRE5, PRRG4, SCARA3, COMP, MAN1A1
iMyoblast vs bMes	MF	Down	GO:0005126	cytokine receptor binding	149	4	23	0.874832	2.60768e-08	1	1.82673e-05	GATA3, BID, CADM4, TGFBRAP1	BMP6, TGFBR3, SOCS2, CXCL3, TSLP, JAK1, VEGFA, TNFSF9, IL6, CXCL2, CXCL5, CD70, CXCL1, CRLF1, CCL2, CKLF, STAT1, CXCL6, VEGFB, PF4, CCL28, PYCARD, ITGB3
iMyoblast vs bMes	MF	Down	GO:0019955	cytokine binding	75	6	16	0.0921986	3.32476e-08	0.995225	2.25142e-05	TRIM16, NOG, THBS1, LTBP4, ITGA4, IL27RA	TGFBR3, VASN, IL1R1, IL13RA2, LRRC32, GREM2, TNFRSF14, LTBP1, IL1RL1, ZFP36, ACKR3, CRLF1, COMP, ITGB3, NBL1, LTBP3
iMyoblast vs bMes	MF	Down	GO:0019838	growth factor binding	105	10	18	0.0109497	1.30242e-07	0.404441	7.34966e-05	IGFBP2, SORT1, PDGFA, RHBDF2, COL4A1, ITGA6, TRIM16, FLT1, THBS1, LTBP4	TGFBR3, COL6A1, VASN, PDGFRA, IL1R1, LRRC32, KAZALD1, COL1A2, LTBP1, LTBP2, IGFBP6, HTRA1, ESM1, COL1A1, ITGB3, WISP1, LTBP3, IGFBP3
iMyoblast vs bMes	MF	Down	GO:0050840	extracellular matrix binding	47	8	12	0.000548468	1.65955e-07	0.0692058	9.1118e-05	AGRN, ITGA3, PLEKHA2, ADAM9, ITGA6, SPP1, ADGRG6, THBS1	ELN, BGN, ADAMTS5, VEGFA, CD248, SPOCK1, DCN, SSC5D, ADGRG1, ITGB3, SMOC1, TGFBI
iMyoblast vs bMes	MF	Down	GO:0005518	collagen binding	52	7	12	0.00511866	6.15141e-07	0.265211	0.000290619	PDGFA, ITGA3, ADAM9, ADGRG6, THBS1, ANTXR1, DDR1	PCOLCE2, ABI3BP, CTSL, PCOLCE, CTSK, SPOCK1, DCN, DDR2, COMP, ADGRG1, COL5A3, TGFBI
iMyoblast vs bMes	MF	Down	GO:0005044	scavenger receptor activity	27	2	9	0.31348	6.34235e-07	1	0.000292829	SCARF1, SCARB1	PRG4, ENPP2, LOXL3, PRSS12, ACKR3, LRP1, SSC5D, SCARA3, COLEC12
iMyoblast vs bMes	MF	Down	GO:0005178	integrin binding	102	9	16	0.0239793	2.188e-06	0.641818	0.000888985	LYN, ITGA3, ADAM9, MYH9, SPP1, EDIL3, DST, THBS1, LTBP4	TNXB, ITGBL1, COL16A1, ADAMTS5, GPNMB, FAP, ESM1, SEMA7A, ITGB5, FBLN5, COMP, FBN1, ITGB3, WISP1, EMILIN1, TGFBI
iMyoblast vs bMes	MF	Down	GO:0030023	extracellular matrix constituent conferring elasticity	8	1	5	0.284431	4.69602e-06	1	0.00167368	FBN2	ELN, EMILIN2, FBLN5, FBN1, EMILIN1
iMyoblast vs bMes	KEGG	Up	hsa04530	Tight junction	123	17	0	4.42809e-06	1	0.000892277	1	NEDD4L, EZR, MYH10, HCLS1, PRKACB, PARD6G, MYL9, PRKAG2, MYH9, TUBA1A, MPDZ, DLG1, CLDN1, MAP3K1, RAB8B, DLG3, F11R
iMyoblast vs bMes	KEGG	Up	hsa04512	ECM-receptor interaction	64	12	13	6.47972e-06	2.53863e-06	0.000892277	0.000284326	AGRN, COL4A2, ITGA3, COL4A1, ITGA6, SPP1, SV2A, COL4A5, LAMB3, THBS1, ITGA4, COL4A6	TNXB, COL6A1, COL6A2, COL6A3, LAMA2, COL9A3, COL1A2, LAMA1, ITGB5, COL1A1, LAMA4, COMP, ITGB3
iMyoblast vs bMes	KEGG	Up	hsa04510	Focal adhesion	172	20	19	7.96676e-06	8.67956e-05	0.000892277	0.00324037	RAC3, VCL, BCAR1, PDGFA, PIK3R3, COL4A2, ITGA3, COL4A1, ITGA6, MYL9, SPP1, SHC3, COL4A5, MYLK, FLT1, LAMB3, THBS1, CCND2, ITGA4, COL4A6	TNXB, COL6A1, PDGFRA, COL6A2, COL6A3, MAPK3, HGF, LAMA2, COL9A3, COL1A2, VEGFA, PARVB, LAMA1, ITGB5, COL1A1, LAMA4, COMP, VEGFB, ITGB3
iMyoblast vs bMes	KEGG	Up	hsa04670	Leukocyte transendothelial migration	81	12	1	5.49507e-05	0.969713	0.00461586	1	VCL, BCAR1, EZR, ESAM, PLCG2, PIK3R3, CYBA, MYL9, ITGA4, MAPK12, CLDN1, F11R	MMP2
iMyoblast vs bMes	KEGG	Up	hsa05206	MicroRNAs in cancer	143	16	11	0.000117252	0.0380391	0.00787936	0.250611	IGF2BP1, PDGFA, DICER1, EZR, PLCG2, PIK3R3, STMN1, HMGA2, DNMT3A, CDK6, CCNG1, NOTCH1, TPM1, THBS1, CCND2, RPS6KA5	TNXB, TIMP3, PDGFRA, HMOX1, MAPK3, VEGFA, ABL1, NOTCH3, BMI1, IRS1, ITGB3
iMyoblast vs bMes	KEGG	Up	hsa04514	Cell adhesion molecules	86	12	4	0.000200806	0.549465	0.0112451	1	PTPRF, ESAM, CDH4, CDH2, ITGA6, NECTIN2, NRXN3, CADM1, ITGA4, CLDN1, CD274, F11R	NFASC, NTNG1, NRXN2, HLA-F
iMyoblast vs bMes	KEGG	Up	hsa05165	Human papillomavirus infection	264	23	22	0.00027761	0.0020406	0.0133253	0.0428527	FZD2, PIK3R3, COL4A2, PRKACB, ITGA3, PARD6G, COL4A1, CDK6, ITGA6, SPP1, COL4A5, TCF7L1, NOTCH1, FZD6, LAMB3, HES4, DLG1, THBS1, CCND2, ITGA4, MAML3, COL4A6, DLG3	TNXB, COL6A1, COL6A2, COL6A3, MAPK3, LAMA2, FZD1, COL9A3, COL1A2, JAK1, VEGFA, TCF7, NOTCH3, LAMA1, DVL1, ITGB5, COL1A1, LAMA4, STAT1, HLA-F, COMP, ITGB3
iMyoblast vs bMes	KEGG	Up	hsa05200	Pathways in cancer	404	30	29	0.000622477	0.00452613	0.0235303	0.0691263	RAC3, MGST2, GNGT2, FZD2, JUP, CBL, PDGFA, PLCG2, PIK3R3, COL4A2, AR, PRKACB, TXNRD1, ITGA3, GADD45A, COL4A1, CDK6, ITGA6, BID, MECOM, ETS1, COL4A5, TCF7L1, NOTCH1, FZD6, LAMB3, CCND2, SMO, COL4A6, RPS6KA5	MMP2, MGST1, PDGFRA, FGF7, PLCB1, HMOX1, MAPK3, RUNX1T1, HGF, LAMA2, FGF18, EDNRB, FZD1, JAK1, PTGER2, VEGFA, ABL1, IL6, TCF7, NOTCH3, LAMA1, DVL1, GSTO2, LAMA4, STAT1, VEGFB, CAMK2D, GNG11, PPARG
iMyoblast vs bMes	KEGG	Up	hsa04810	Regulation of actin cytoskeleton	167	16	6	0.000630276	0.704887	0.0235303	1	RAC3, VCL, BCAR1, GIT1, PDGFA, EZR, PIK3R3, MYH10, ITGA3, ITGA6, MYL9, MYH9, CYFIP2, MYLK, ITGA4, TMSB4X	PDGFRA, FGF7, MAPK3, FGF18, ITGB5, ITGB3
iMyoblast vs bMes	KEGG	Up	hsa05222	Small cell lung cancer	84	10	3	0.0016757	0.709563	0.0563036	1	PIK3R3, COL4A2, ITGA3, GADD45A, COL4A1, CDK6, ITGA6, COL4A5, LAMB3, COL4A6	LAMA2, LAMA1, LAMA4
iMyoblast vs bMes	KEGG	Up	hsa04392	Hippo signaling pathway - multiple species	24	5	0	0.00210429	1	0.0642763	1	TEAD2, DCHS1, AJUBA, RASSF4, LATS2
iMyoblast vs bMes	KEGG	Up	hsa05412	Arrhythmogenic right ventricular cardiomyopathy	60	8	6	0.0025075	0.0451227	0.0662591	0.280764	JUP, DSG2, ITGA3, CACNG8, CDH2, ITGA6, TCF7L1, ITGA4	LAMA2, CACNA1C, TCF7, LAMA1, ITGB5, ITGB3
iMyoblast vs bMes	KEGG	Up	hsa04974	Protein digestion and absorption	48	7	11	0.0025636	4.02565e-06	0.0662591	0.000338155	COL18A1, COL13A1, COL4A2, COL4A1, COL4A5, COL4A6, MME	ELN, COL6A1, SLC1A1, COL6A2, COL6A3, COL22A1, COL9A3, COL1A2, KCNN4, COL1A1, COL5A3
iMyoblast vs bMes	KEGG	Up	hsa05225	Hepatocellular carcinoma	141	13	8	0.00332802	0.249959	0.0748628	0.730367	SMARCC1, MGST2, FZD2, PLCG2, PIK3R3, SMARCD1, TXNRD1, GADD45A, SMARCD3, CDK6, SHC3, TCF7L1, FZD6	MGST1, HMOX1, MAPK3, HGF, FZD1, TCF7, DVL1, GSTO2
iMyoblast vs bMes	KEGG	Up	hsa05146	Amoebiasis	64	8	12	0.00348669	1.34596e-05	0.0748628	0.000646059	VCL, PIK3R3, COL4A2, PRKACB, COL4A1, COL4A5, LAMB3, COL4A6	PLCB1, IL1R1, CXCL3, LAMA2, COL1A2, IL6, CXCL2, RAB7B, CXCL1, LAMA1, COL1A1, LAMA4
iMyoblast vs bMes	KEGG	Up	hsa00100	Steroid biosynthesis	17	4	0	0.0035649	1	0.0748628	1	SC5D, LBR, DHCR24, DHCR7
iMyoblast vs bMes	KEGG	Up	hsa04390	Hippo signaling pathway	130	12	4	0.00530514	0.820254	0.104855	1	FBXW11, TEAD2, FZD2, TP53BP2, AJUBA, PARD6G, TCF7L1, FZD6, DLG1, CCND2, LATS2, DLG3	BMP6, FZD1, TCF7, DVL1
iMyoblast vs bMes	KEGG	Up	hsa05130	Pathogenic Escherichia coli infection	153	13	7	0.00639643	0.471235	0.1194	0.948113	TUBB2B, EZR, MYH10, HCLS1, NCK2, MYH9, TUBB2A, CYFIP2, TUBA1A, MYO6, TNFRSF10B, MAPK12, CLDN1	IL1R1, MAPK3, MYO1B, ABL1, IL6, CASP1, PYCARD
iMyoblast vs bMes	KEGG	Up	hsa04360	Axon guidance	153	13	8	0.00932837	0.367257	0.164965	0.84559	RAC3, PLCG2, PIK3R3, EFNB2, EPHA2, PLXNA2, NCK2, PARD6G, MYL9, EPHB4, SEMA3D, SMO, SEMA3A	MAPK3, SRGAP1, ABL1, NTNG1, SEMA7A, NGEF, CAMK2D, NFATC4
iMyoblast vs bMes	KEGG	Up	hsa05100	Bacterial invasion of epithelial cells	68	7	0	0.0132635	1	0.215789	1	VCL, BCAR1, CBL, SEPT11, PIK3R3, HCLS1, SHC3
iMyoblast vs bMes	KEGG	Down	hsa04061	Viral protein interaction with cytokine and cytokine receptor	33	2	12	0.417509	1.16229e-08	1	3.9053e-06	TNFRSF10B, TNFRSF10D	LTBR, CXCL3, TNFRSF14, IL6, CXCL2, ACKR3, CXCL5, CXCL1, CCL2, CXCL6, PF4, CCL28
iMyoblast vs bMes	KEGG	Down	hsa04060	Cytokine-cytokine receptor interaction	116	4	21	0.743981	5.69532e-08	1	9.56813e-06	TNFRSF21, TNFRSF10B, IL27RA, TNFRSF10D	LTBR, BMP6, IL1R1, IL13RA2, IL17RC, CXCL3, TSLP, TNFRSF14, TNFSF9, IL6, IL1RL1, CXCL2, ACKR3, CXCL5, CD70, CXCL1, IL33, CCL2, CXCL6, PF4, CCL28
iMyoblast vs bMes	KEGG	Down	hsa04512	ECM-receptor interaction	64	12	13	6.47972e-06	2.53863e-06	0.000892277	0.000284326	AGRN, COL4A2, ITGA3, COL4A1, ITGA6, SPP1, SV2A, COL4A5, LAMB3, THBS1, ITGA4, COL4A6	TNXB, COL6A1, COL6A2, COL6A3, LAMA2, COL9A3, COL1A2, LAMA1, ITGB5, COL1A1, LAMA4, COMP, ITGB3
iMyoblast vs bMes	KEGG	Down	hsa04974	Protein digestion and absorption	48	7	11	0.0025636	4.02565e-06	0.0662591	0.000338155	COL18A1, COL13A1, COL4A2, COL4A1, COL4A5, COL4A6, MME	ELN, COL6A1, SLC1A1, COL6A2, COL6A3, COL22A1, COL9A3, COL1A2, KCNN4, COL1A1, COL5A3
iMyoblast vs bMes	KEGG	Down	hsa05323	Rheumatoid arthritis	52	1	11	0.885497	1.16502e-05	1	0.000646059	FLT1	CTSL, CXCL3, CTSK, VEGFA, MMP3, IL6, CXCL2, CXCL5, CXCL1, CCL2, CXCL6
iMyoblast vs bMes	KEGG	Down	hsa00590	Arachidonic acid metabolism	26	0	8	1	1.22032e-05	1	0.000646059		PTGS1, PLA2G4A, PTGES, CBR1, GPX3, GPX7, PTGIS, AKR1C3
iMyoblast vs bMes	KEGG	Down	hsa05146	Amoebiasis	64	8	12	0.00348669	1.34596e-05	0.0748628	0.000646059	VCL, PIK3R3, COL4A2, PRKACB, COL4A1, COL4A5, LAMB3, COL4A6	PLCB1, IL1R1, CXCL3, LAMA2, COL1A2, IL6, CXCL2, RAB7B, CXCL1, LAMA1, COL1A1, LAMA4
iMyoblast vs bMes	KEGG	Down	hsa04657	IL-17 signaling pathway	67	1	12	0.939276	2.83996e-05	1	0.00119278	MAPK12	MAPK3, IL17RC, CXCL3, MMP3, IL6, CXCL2, CXCL5, CXCL1, CEBPB, CCL2, FOSB, CXCL6
iMyoblast vs bMes	KEGG	Down	hsa04510	Focal adhesion	172	20	19	7.96676e-06	8.67956e-05	0.000892277	0.00324037	RAC3, VCL, BCAR1, PDGFA, PIK3R3, COL4A2, ITGA3, COL4A1, ITGA6, MYL9, SPP1, SHC3, COL4A5, MYLK, FLT1, LAMB3, THBS1, CCND2, ITGA4, COL4A6	TNXB, COL6A1, PDGFRA, COL6A2, COL6A3, MAPK3, HGF, LAMA2, COL9A3, COL1A2, VEGFA, PARVB, LAMA1, ITGB5, COL1A1, LAMA4, COMP, VEGFB, ITGB3
iMyoblast vs bMes	KEGG	Down	hsa04151	PI3K-Akt signaling pathway	257	18	25	0.0134868	9.9424e-05	0.215789	0.00334065	GNGT2, PDGFA, PIK3R3, COL4A2, EPHA2, ITGA3, COL4A1, CDK6, ITGA6, SPP1, COL4A5, FLT1, LAMB3, THBS1, CCND2, ITGA4, COL4A6, PKN3	TNXB, COL6A1, PDGFRA, FGF7, COL6A2, COL6A3, MAPK3, HGF, LAMA2, FGF18, COL9A3, COL1A2, JAK1, VEGFA, IL6, LAMA1, ITGB5, COL1A1, LAMA4, IRS1, COMP, VEGFB, NR4A1, ITGB3, GNG11
iMyoblast vs bMes	KEGG	Down	hsa05031	Amphetamine addiction	41	1	8	0.806898	0.00026604	1	0.0081263	PRKACB	CACNA1C, FOSB, STX1A, GRIA1, ARC, CAMK2D, GRIA3, GRIN2D
iMyoblast vs bMes	KEGG	Down	hsa04724	Glutamatergic synapse	64	3	10	0.491326	0.000451266	1	0.0126355	GNGT2, SLC38A1, PRKACB	PLA2G4A, SLC1A1, PLCB1, MAPK3, CACNA1C, GRIA1, GNG11, GRIA3, GRIN2D, SLC1A3
iMyoblast vs bMes	KEGG	Down	hsa04978	Mineral absorption	38	0	7	1	0.00106557	1	0.0259027		MT1M, MT1A, HMOX1, MT1X, STEAP1, SLC39A4, MT2A
iMyoblast vs bMes	KEGG	Down	hsa05133	Pertussis	49	1	8	0.866255	0.00107928	1	0.0259027	MAPK12	MAPK3, C1S, IL6, CXCL5, C1R, CASP1, CXCL6, PYCARD
iMyoblast vs bMes	KEGG	Down	hsa04933	AGE-RAGE signaling pathway in diabetic complications	88	8	11	0.0240876	0.00137715	0.299757	0.0308481	PLCG2, PIK3R3, COL4A2, COL4A1, COL4A5, NOX4, MAPK12, COL4A6	MMP2, PLCB1, MAPK3, COL1A2, VEGFA, IL6, CCL2, COL1A1, EGR1, STAT1, VEGFB
iMyoblast vs bMes	KEGG	Down	hsa05165	Human papillomavirus infection	264	23	22	0.00027761	0.0020406	0.0133253	0.0428527	FZD2, PIK3R3, COL4A2, PRKACB, ITGA3, PARD6G, COL4A1, CDK6, ITGA6, SPP1, COL4A5, TCF7L1, NOTCH1, FZD6, LAMB3, HES4, DLG1, THBS1, CCND2, ITGA4, MAML3, COL4A6, DLG3	TNXB, COL6A1, COL6A2, COL6A3, MAPK3, LAMA2, FZD1, COL9A3, COL1A2, JAK1, VEGFA, TCF7, NOTCH3, LAMA1, DVL1, ITGB5, COL1A1, LAMA4, STAT1, HLA-F, COMP, ITGB3
iMyoblast vs bMes	KEGG	Down	hsa04621	NOD-like receptor signaling pathway	125	6	13	0.391572	0.00299547	1	0.0592045	NLRP1, CYBA, GABARAP, CARD8, MAPK12, ANTXR1	PLCB1, MAPK3, CXCL3, JAK1, IL6, CXCL2, CXCL1, CCL2, CASP1, CARD16, STAT1, PYCARD, TRPV2
iMyoblast vs bMes	KEGG	Down	hsa04713	Circadian entrainment	58	3	8	0.421958	0.00360304	1	0.0672568	GNGT2, PRKACB, RPS6KA5	PLCB1, MAPK3, CACNA1C, GRIA1, CAMK2D, GNG11, GRIA3, GRIN2D
iMyoblast vs bMes	KEGG	Down	hsa04668	TNF signaling pathway	97	3	11	0.773936	0.00389179	1	0.0688232	PIK3R3, MAPK12, RPS6KA5	MAPK3, CXCL3, MMP3, JUNB, IL6, CXCL2, CXCL5, CXCL1, CEBPB, CCL2, CXCL6
iMyoblast vs bMes	KEGG	Down	hsa04062	Chemokine signaling pathway	115	7	12	0.184448	0.00434908	0.8883	0.0691263	LYN, RAC3, GNGT2, BCAR1, PIK3R3, PRKACB, SHC3	PLCB1, MAPK3, CXCL3, CXCL2, CXCL5, CXCL1, CCL2, STAT1, CXCL6, PF4, CCL28, GNG11

## Sheet: iMyoblast vs S1
Supplementary file 2. Top 20 Up and Down GO terms (BP, CC, MF) and KEGG pathways for pairwise cell type comparisons. Terms comprising N (< 500) genes are sorted by P.Up and P.Down. For each term, the top Genes.Up and Genes.Down are listed.
Comparison	Ont	Dir	GO/KEGG ID	GO Term / KEGG Pathway (top 20 Up and Down)	N	Up	Down	P.Up	P.Down	FDR.Up	FDR.Down	Genes.Up (limited to a maximum of the top 30 Up genes)	Genes.Down (limited to a maximum of the top 30 Down genes)
iMyoblast vs S1	BP	Up	GO:0030155	regulation of cell adhesion	474	78	52	4.50492e-14	0.00273498	4.57587e-10	0.169394	PLEKHA2, TGFB1, PIEZO1, DOCK5, ADAM9, HLA-E, CD47, TGFBI, SIRPA, IL7R, FOXC2, LMO7, ITGA2, CBFB, CD9, SMAD7, CYLD, NFKBIZ, ITGA3, FLOT1, TGFBR2, ACTN4, DLC1, LGALS1, FSTL3, ADGRG1, CD44, HLX, CD274, ITGA5	LAMA1, SOCS1, LEF1, GPM6B, PELI1, BMP4, IGF1, EMILIN2, TNC, EFNB1, LAMA2, RAC3, SEMA6A, PDE3B, DOCK8, BMP7, AP1AR, CYP1B1, PIK3R1, CD74, MDK, EPHB3, COL26A1, FBLN1, SYK, ICAM1, EFNB3, GLI3, PRKX, TGFB2
iMyoblast vs S1	BP	Up	GO:0006954	inflammatory response	396	68	32	1.10899e-12	0.398991	5.76757e-09	1	TGFB1, BIRC2, CASP4, RABGEF1, HLA-E, NFE2L2, CD47, AXL, SIRPA, HIF1A, APPL2, SCN9A, SIGIRR, ITGA2, FOXP1, SEMA7A, CYLD, NFKBIZ, NR1D2, NLRP1, CD44, RPS6KA4, PXK, FN1, SOCS5, SERPINE1, PTGER1, RIPK2, TRADD, MGLL	AHCY, APOE, TRIL, IGF1, LDLR, AFAP1L2, TNFRSF1B, NFRKB, MDK, SYK, ICAM1, FOS, KDM6B, F12, MFHAS1, TSPAN2, PER1, MMP9, EPHX2, CDO1, MVK, CRHBP, ELF3, EDNRB, CYP26B1, ADM, SMO, KLRG1, NR1H3, IL6R
iMyoblast vs S1	BP	Up	GO:0030198	extracellular matrix organization	269	51	30	4.6848e-12	0.0145119	1.3596e-08	0.410425	MMP1, COL13A1, ENG, ITGB1, TGFB1, CD47, EFEMP2, TGFBI, QSOX1, LAMB3, FOXC2, ITGA2, FURIN, ITGA3, FLOT1, P4HA1, CD44, ITGA5, FN1, THSD4, ANTXR1, CCDC80, ITGB5, DNAJB6, LOXL1, SERPINE1, FGF2, FBN1, SCUBE3, COL8A1	LAMA1, GPM6B, COL9A3, TNC, LAMA2, COL2A1, ITGA1, TNFRSF1B, SULF2, BGN, CYP1B1, ITGA9, OLFML2A, FBLN1, RAMP2, ICAM1, A2M, COL9A2, TCF15, TGFB2, FOXC1, NID2, SFRP2, MMP9, ADAM12, COL23A1, ADAMTS9, ELF3, COL7A1, FBN2
iMyoblast vs S1	BP	Up	GO:0043062	extracellular structure organization	270	51	30	5.50055e-12	0.0153115	1.3968e-08	0.415454	MMP1, COL13A1, ENG, ITGB1, TGFB1, CD47, EFEMP2, TGFBI, QSOX1, LAMB3, FOXC2, ITGA2, FURIN, ITGA3, FLOT1, P4HA1, CD44, ITGA5, FN1, THSD4, ANTXR1, CCDC80, ITGB5, DNAJB6, LOXL1, SERPINE1, FGF2, FBN1, SCUBE3, COL8A1	LAMA1, GPM6B, COL9A3, TNC, LAMA2, COL2A1, ITGA1, TNFRSF1B, SULF2, BGN, CYP1B1, ITGA9, OLFML2A, FBLN1, RAMP2, ICAM1, A2M, COL9A2, TCF15, TGFB2, FOXC1, NID2, SFRP2, MMP9, ADAM12, COL23A1, ADAMTS9, ELF3, COL7A1, FBN2
iMyoblast vs S1	BP	Up	GO:0048514	blood vessel morphogenesis	454	71	54	1.11864e-11	0.000436175	2.2126e-08	0.0503459	VEGFC, ENG, ITGB1, TGFB1, ARHGAP22, KLF2, AKT3, BMPR2, NFE2L2, TGFBI, HIF1A, FOXC2, PGF, STARD13, HOXA3, SMAD7, TNFRSF12A, TGFBR2, ADGRG1, CSPG4, EPHB2, FAM129B, XDH, ITGA5, PTPRB, FN1, SP100, HSPB6, APOLD1, SERPINE1	LAMA1, APOE, LEF1, BMP4, CHD7, SLIT2, LDLR, FGF9, VASH2, SEMA6A, PIK3R3, PDE3B, HIF3A, RASIP1, CYP1B1, AMOT, ZFP36L1, MDK, EPHB3, GLUL, RAMP2, SYK, AMOTL1, FGFR2, NOTCH3, PRKX, PROX1, TGFB2, ROBO1, PRRX1
iMyoblast vs S1	BP	Up	GO:0045785	positive regulation of cell adhesion	275	51	27	1.19806e-11	0.0772924	2.2126e-08	0.797602	PLEKHA2, TGFB1, PIEZO1, DOCK5, ADAM9, HLA-E, CD47, SIRPA, IL7R, FOXC2, ITGA2, CBFB, SMAD7, CYLD, NFKBIZ, ITGA3, FLOT1, TGFBR2, LGALS1, FSTL3, ADGRG1, CD44, HLX, CD274, ITGA5, FN1, CXCL12, TRIOBP, SOCS5, PAK1	SOCS1, IGF1, EMILIN2, EFNB1, RAC3, DOCK8, BMP7, PIK3R1, CD74, MDK, COL26A1, SYK, ICAM1, EFNB3, GLI3, TGFB2, MALT1, SFRP2, EPB41L5, CD4, ANK3, ZAP70, ITPKB, CD83, IL6R, CD24, IGFBP2
iMyoblast vs S1	BP	Up	GO:2000147	positive regulation of cell motility	398	64	30	1.48158e-11	0.461564	2.5082e-08	1	VEGFC, SUN2, ITGB1, TGFB1, MYO1C, AKT3, DOCK5, ADAM9, BMPR2, NFE2L2, CD151, MET, HIF1A, DAB2, FOXC2, ITGA2, FOXP1, PGF, CAVIN1, SEMA7A, ITGA3, TGFBR2, ACTN4, CD274, ITGA5, FN1, CXCL12, PAK1, SERPINE1, RTN4	LEF1, BMP4, IGF1, FGF9, NSMF, CXCL14, SEMA6A, SEMA6B, PIK3R3, PDGFD, DOCK8, BMP7, PIK3R1, SCARB1, CD74, MDK, AMOTL1, ICAM1, PROX1, TGFB2, ATP8A1, TWIST1, MMP9, EPB41L5, ENPP2, EDN3, FGF18, ADRA2A, SMO, IL6R
iMyoblast vs S1	BP	Up	GO:0030335	positive regulation of cell migration	390	63	29	1.76939e-11	0.494033	2.56751e-08	1	VEGFC, SUN2, ITGB1, TGFB1, MYO1C, AKT3, DOCK5, ADAM9, BMPR2, NFE2L2, CD151, MET, HIF1A, DAB2, FOXC2, ITGA2, FOXP1, PGF, SEMA7A, ITGA3, TGFBR2, ACTN4, CD274, ITGA5, FN1, CXCL12, PAK1, SERPINE1, RTN4, FGF2	LEF1, BMP4, IGF1, FGF9, NSMF, CXCL14, SEMA6A, SEMA6B, PIK3R3, PDGFD, DOCK8, BMP7, PIK3R1, SCARB1, CD74, MDK, AMOTL1, ICAM1, PROX1, TGFB2, ATP8A1, MMP9, EPB41L5, ENPP2, EDN3, FGF18, ADRA2A, SMO, IL6R
iMyoblast vs S1	BP	Up	GO:0040017	positive regulation of locomotion	407	64	32	4.00597e-11	0.363874	5.08633e-08	1	VEGFC, SUN2, ITGB1, TGFB1, MYO1C, AKT3, DOCK5, ADAM9, BMPR2, NFE2L2, CD151, MET, HIF1A, DAB2, FOXC2, ITGA2, FOXP1, PGF, CAVIN1, SEMA7A, ITGA3, TGFBR2, ACTN4, CD274, ITGA5, FN1, CXCL12, PAK1, SERPINE1, RTN4	LEF1, BMP4, IGF1, TUBB2B, SLIT2, FGF9, NSMF, CXCL14, SEMA6A, SEMA6B, PIK3R3, PDGFD, DOCK8, BMP7, PIK3R1, SCARB1, CD74, MDK, AMOTL1, ICAM1, PROX1, TGFB2, ATP8A1, TWIST1, MMP9, EPB41L5, ENPP2, EDN3, FGF18, ADRA2A
iMyoblast vs S1	BP	Up	GO:0051272	positive regulation of cellular component movement	411	64	31	6.47328e-11	0.463465	7.73557e-08	1	VEGFC, SUN2, ITGB1, TGFB1, MYO1C, AKT3, DOCK5, ADAM9, BMPR2, NFE2L2, CD151, MET, HIF1A, DAB2, FOXC2, ITGA2, FOXP1, PGF, CAVIN1, SEMA7A, ITGA3, TGFBR2, ACTN4, CD274, ITGA5, FN1, CXCL12, PAK1, SERPINE1, RTN4	LEF1, BMP4, IGF1, TUBB2B, FGF9, NSMF, CXCL14, SEMA6A, SEMA6B, PIK3R3, PDGFD, DOCK8, BMP7, PIK3R1, SCARB1, CD74, MDK, AMOTL1, ICAM1, PROX1, TGFB2, ATP8A1, TWIST1, MMP9, EPB41L5, ENPP2, EDN3, FGF18, ADRA2A, SMO
iMyoblast vs S1	BP	Up	GO:0090287	regulation of cellular response to growth factor stimulus	215	42	26	1.1841e-10	0.00785569	1.20275e-07	0.284132	SKIL, VEGFC, ENG, TGFB1, MYO1C, VEPH1, BMPR2, HIF1A, DAB2, FOXD1, SMAD7, ITGA3, TGFBR2, FSTL3, MYOF, FAM129B, XDH, ITGA5, FST, FGF2, FBN1, FSTL1, DKK1, NEDD4, CAV2, BMPER, SMAD6, GREM1, THBS1, CYR61	WFIKKN1, GPC3, FGFBP3, RNF165, BMP4, PTP4A3, SPRY1, ZNF423, MSX1, CADM4, RASL11B, SLIT2, FGF9, MSX2, SEMA6A, SULF2, RBPMS2, CYFIP2, MTMR4, CRB2, ROBO1, SOX11, SFRP2, PEG10, FGF18, FBN2
iMyoblast vs S1	BP	Up	GO:0001525	angiogenesis	378	60	44	2.33102e-10	0.00213962	2.15249e-07	0.142513	VEGFC, ENG, ITGB1, ARHGAP22, KLF2, AKT3, NFE2L2, TGFBI, HIF1A, FOXC2, PGF, STARD13, HOXA3, TNFRSF12A, TGFBR2, ADGRG1, CSPG4, EPHB2, FAM129B, ITGA5, PTPRB, FN1, SP100, HSPB6, APOLD1, SERPINE1, FZD8, FGF2, ADGRB3, ELK3	LEF1, BMP4, SLIT2, FGF9, VASH2, SEMA6A, PIK3R3, PDE3B, HIF3A, RASIP1, CYP1B1, AMOT, MDK, EPHB3, GLUL, RAMP2, SYK, AMOTL1, FGFR2, NOTCH3, PRKX, TGFB2, ROBO1, FOXC1, TWIST1, FBXW7, SFRP2, EIF2AK3, ADAM12, JAG1
iMyoblast vs S1	BP	Up	GO:0001667	ameboidal-type cell migration	322	52	39	1.16367e-09	0.00138362	9.84998e-07	0.108526	VEGFC, ITGB1, TGFB1, AKT3, DOCK5, ADAM9, BMPR2, NFE2L2, MET, S100A2, HIF1A, APPL2, FOXC2, ITGA2, FOXP1, STARD13, SEMA7A, ITGA3, PXN, TGFBR2, FN1, SP100, PAK1, RTN4, FGF2, SEMA4B, SLC8A1, KANK2, SEMA3C, HBEGF	APOE, GPC3, BMP4, PTP4A3, EVL, SLIT2, NANOS1, CENPV, EFNB1, SEMA6A, SEMA6B, PIK3R3, MCC, BMP7, CYP1B1, SCARB1, PTPRG, AMOT, GLUL, AMOTL1, PRKX, PROX1, CRB2, TGFB2, ROBO1, TWIST1, FBXW7, MMP9, EPB41L5, ADAMTS9
iMyoblast vs S1	BP	Up	GO:0031589	cell-substrate adhesion	269	46	25	1.45686e-09	0.129269	1.18384e-06	0.97806	COL13A1, PLEKHA2, ITGB1, DOCK5, ADAM9, AXL, LAMB3, ITGA2, TNFRSF12A, ITGA3, PXN, ACTN4, DLC1, LGALS1, CD44, ITGA5, FN1, TRIOBP, ANTXR1, CCDC80, ITGB5, NF2, SERPINE1, PTPRJ, RASA1, COL8A1, LAMC2, NTN4, SMAD6, THBS1	GPM6B, EMILIN2, SORBS1, ITGA1, RAC3, BCL2L11, AP1AR, PIK3R1, MDK, EPHB3, COL26A1, FBLN1, MERTK, PRKX, LIMCH1, NID2, EPB41L5, JAG1, EDA, ADAMTS9, ACTN2, ARHGAP6, ANGPT2, CDKN2A, EPDR1
iMyoblast vs S1	BP	Up	GO:0050727	regulation of inflammatory response	195	38	14	3.52978e-09	0.626093	2.65583e-06	1	BIRC2, RABGEF1, HLA-E, CD47, SIRPA, APPL2, ITGA2, FOXP1, SEMA7A, CYLD, NFKBIZ, NR1D2, NLRP1, SOCS5, SERPINE1, TRADD, MGLL, TGM2, FABP4, RB1, C5orf30, TICAM1, USP18, TLR4, BST1, EGFR, FNDC4, ABCD1, IL18, AGTR1	APOE, IGF1, LDLR, TNFRSF1B, MDK, F12, MFHAS1, PER1, MMP9, MVK, EDNRB, NR1H3, CALCRL, KLF4
iMyoblast vs S1	BP	Up	GO:0042060	wound healing	384	57	31	4.06402e-09	0.313162	2.94859e-06	1	CD59, TGFB1, PLEC, EHD2, F2RL2, NFE2L2, CD151, AXL, HIF1A, FOXC2, ITGA2, CD9, PLAUR, TNFRSF12A, TGFBR2, GNA11, MAP3K5, MYOF, CD44, SLC7A11, ITGA5, FN1, PAK1, TOR1A, SERPINE1, FGF2, ELK3, DST, ITPR3, PRKACB	APOE, IGF1, PROS1, CADM4, HMGCR, TNC, MYH10, MSX2, LARGE1, DOCK8, PIK3R1, SCARB1, ITGA9, MDK, P2RY1, FBLN1, GAP43, SYK, A2M, MERTK, GLI3, FGFR2, TGFB2, CDH3, F12, IL24, SERPING1, PPL, DOCK11, HBE1
iMyoblast vs S1	BP	Up	GO:0030500	regulation of bone mineralization	54	18	8	5.82615e-09	0.0437083	3.94527e-06	0.685743	TGFB1, BMPR2, HIF1A, LTBP3, NBR1, SRGN, RFLNB, SLC8A1, BCOR, ADRB2, GREM1, CYR61, FAM20C, ECM1, ACVR1, S1PR1, SMAD3, ENPP1	GPM6B, BMP4, ACVR2B, PKDCC, BMP7, TMEM119, TWIST1, FBN2
iMyoblast vs S1	BP	Up	GO:0031347	regulation of defense response	416	58	23	3.40732e-08	0.945178	2.23289e-05	1	ULBP2, PSMB8, BIRC2, RABGEF1, HLA-E, CD47, SIRPA, APPL2, PSMD2, TMEM173, ITGA2, FOXP1, SEMA7A, CYLD, NFKBIZ, NR1D2, NLRP1, NLRC5, SOCS5, PAK1, SERPINE1, PVR, RIPK2, NR1H2, TRADD, MGLL, TGM2, FABP4, PTPN22, JAK1	APOE, SOCS1, IGF1, LDLR, TNFRSF1B, RNF125, ZCCHC3, TSPAN6, MDK, SYK, A2M, ARG2, MALT1, F12, MFHAS1, PER1, MMP9, SERPING1, MVK, EDNRB, NR1H3, CALCRL, KLF4
iMyoblast vs S1	BP	Up	GO:0048771	tissue remodeling	114	26	14	3.71709e-08	0.0489153	2.25987e-05	0.729075	TGFB1, BMPR2, AXL, HIF1A, FOXC2, LTBP3, HOXA3, CSPG4, TGM2, NOL3, SEMA3C, UBASH3B, TCIRG1, ADRB2, GREM1, EGFR, SIGLEC15, TIMP1, ITGB3, IL18, CAV1, S1PR1, IL15, F2R, MMP14, NOX4	CHD7, PPARGC1B, ACVR2B, BGN, MDK, WNT16, SYK, MERTK, TMEM119, FOXC1, INPP5D, JAG1, ELF3, ZNF675
iMyoblast vs S1	BP	Up	GO:0030502	negative regulation of bone mineralization	11	8	0	3.73456e-08	1	2.25987e-05	1	HIF1A, LTBP3, SRGN, RFLNB, BCOR, GREM1, ECM1, ENPP1
iMyoblast vs S1	BP	Down	GO:1902653	secondary alcohol biosynthetic process	60	2	25	0.897226	3.52059e-14	1	7.15208e-10	G6PD, SEC14L2	SQLE, APOE, HMGCS1, MSMO1, SCD, HMGCR, FASN, IDI1, TM7SF2, DHCR24, FDFT1, LSS, ACACA, PRKAA2, ACAT2, MVD, FDPS, ERG28, DHCR7, SREBF2, INSIG1, ELOVL6, CYP51A1, MVK, HSD17B7
iMyoblast vs S1	BP	Down	GO:0006695	cholesterol biosynthetic process	59	2	24	0.892346	2.23749e-13	1	1.65724e-09	G6PD, SEC14L2	SQLE, APOE, HMGCS1, MSMO1, SCD, HMGCR, FASN, IDI1, TM7SF2, DHCR24, FDFT1, LSS, ACACA, PRKAA2, ACAT2, MVD, FDPS, DHCR7, SREBF2, INSIG1, ELOVL6, CYP51A1, MVK, HSD17B7
iMyoblast vs S1	BP	Down	GO:0046890	regulation of lipid biosynthetic process	142	9	39	0.614648	2.44731e-13	1	1.65724e-09	ACADVL, NR1H2, CGA, CYR61, SEC14L2, DKK3, ABCD1, IGFBP7, SPHK1	SQLE, APOE, HMGCS1, FABP3, APOC1, SCD, HMGCR, CCDC3, FASN, SORBS1, IDI1, TM7SF2, FDFT1, LSS, ACACA, LDLR, PRKAA2, MVD, FDPS, ASAH1, DHCR7, SREBF2, IDH1, SCARB1, CD74, BMP5, LPCAT1, INSIG1, PROX1, RDH10
iMyoblast vs S1	BP	Down	GO:0016126	sterol biosynthetic process	65	2	25	0.923107	3.75609e-13	1	1.90762e-09	G6PD, SEC14L2	SQLE, APOE, HMGCS1, MSMO1, SCD, HMGCR, FASN, IDI1, TM7SF2, DHCR24, FDFT1, LSS, ACACA, PRKAA2, ACAT2, MVD, FDPS, ERG28, DHCR7, SREBF2, INSIG1, ELOVL6, CYP51A1, MVK, HSD17B7
iMyoblast vs S1	BP	Down	GO:0035107	appendage morphogenesis	123	6	36	0.866147	8.40569e-13	1	2.84603e-09	ASPH, MBNL1, MAP3K20, SEMA3C, DKK1, PLXNA2	LEF1, SALL4, GPC3, RNF165, BMP4, ZNF219, CHD7, MSX1, DYNC2H1, PTCH1, COL2A1, FGF9, MSX2, PKDCC, BCL2L11, BMP7, SALL3, GLI3, FGFR2, TGFB2, RDH10, SOX11, CACNA1C, FREM2, PRRX1, SOX4, FRAS1, TWIST1, PCSK5, PBX1
iMyoblast vs S1	BP	Down	GO:0035108	limb morphogenesis	123	6	36	0.866147	8.40569e-13	1	2.84603e-09	ASPH, MBNL1, MAP3K20, SEMA3C, DKK1, PLXNA2	LEF1, SALL4, GPC3, RNF165, BMP4, ZNF219, CHD7, MSX1, DYNC2H1, PTCH1, COL2A1, FGF9, MSX2, PKDCC, BCL2L11, BMP7, SALL3, GLI3, FGFR2, TGFB2, RDH10, SOX11, CACNA1C, FREM2, PRRX1, SOX4, FRAS1, TWIST1, PCSK5, PBX1
iMyoblast vs S1	BP	Down	GO:0048736	appendage development	148	10	39	0.583425	3.28097e-12	1	8.3316e-09	ASPH, MBNL1, BMPR2, SLC7A11, MAP3K20, SEMA3C, DKK1, GREM1, PLXNA2, ITGA6	LEF1, SALL4, GPC3, RNF165, BMP4, ZNF219, CHD7, MSX1, DYNC2H1, PTCH1, COL2A1, FGF9, MSX2, ZNRF3, PKDCC, BCL2L11, BMP7, SMOC1, KREMEN2, SALL3, GLI3, FGFR2, TGFB2, RDH10, SOX11, CACNA1C, FREM2, PRRX1, SOX4, FRAS1
iMyoblast vs S1	BP	Down	GO:0060173	limb development	148	10	39	0.583425	3.28097e-12	1	8.3316e-09	ASPH, MBNL1, BMPR2, SLC7A11, MAP3K20, SEMA3C, DKK1, GREM1, PLXNA2, ITGA6	LEF1, SALL4, GPC3, RNF165, BMP4, ZNF219, CHD7, MSX1, DYNC2H1, PTCH1, COL2A1, FGF9, MSX2, ZNRF3, PKDCC, BCL2L11, BMP7, SMOC1, KREMEN2, SALL3, GLI3, FGFR2, TGFB2, RDH10, SOX11, CACNA1C, FREM2, PRRX1, SOX4, FRAS1
iMyoblast vs S1	BP	Down	GO:0050810	regulation of steroid biosynthetic process	70	4	25	0.672256	4.40974e-12	1	9.95377e-09	CGA, SEC14L2, DKK3, IGFBP7	SQLE, APOE, HMGCS1, SCD, HMGCR, FASN, IDI1, TM7SF2, FDFT1, LSS, ACACA, MVD, FDPS, ASAH1, DHCR7, SREBF2, BMP5, INSIG1, PROX1, ELOVL6, STARD4, CYP51A1, MVK, EGR1, ADM
iMyoblast vs S1	BP	Down	GO:0019218	regulation of steroid metabolic process	88	6	28	0.526335	8.74165e-12	1	1.77587e-08	ACADVL, CGA, SEC14L2, DKK3, AGTR1, IGFBP7	SQLE, APOE, HMGCS1, APOC1, SCD, HMGCR, FASN, IDI1, TM7SF2, FDFT1, LSS, ACACA, LDLR, MVD, FDPS, ASAH1, DHCR7, SREBF2, BMP5, INSIG1, PROX1, ELOVL6, STARD4, EPHX2, CYP51A1, MVK, EGR1, ADM
iMyoblast vs S1	BP	Down	GO:0006694	steroid biosynthetic process	135	5	35	0.949694	1.88012e-11	1	3.47225e-08	G6PD, CGA, SEC14L2, DKK3, IGFBP7	SQLE, APOE, HMGCS1, MSMO1, SCD, HMGCR, FASN, IDI1, TM7SF2, DHCR24, FDFT1, LSS, ACACA, PRKAA2, ACAT2, MVD, FDPS, ASAH1, ERG28, DHCR7, SREBF2, SCARB1, BMP5, INSIG1, PROX1, ELOVL6, STARD4, PBX1, CYP51A1, SLC27A5
iMyoblast vs S1	BP	Down	GO:0045540	regulation of cholesterol biosynthetic process	40	1	18	0.924992	2.81297e-11	1	4.3958e-08	SEC14L2	SQLE, APOE, HMGCS1, SCD, HMGCR, FASN, IDI1, TM7SF2, FDFT1, LSS, ACACA, MVD, FDPS, DHCR7, SREBF2, ELOVL6, CYP51A1, MVK
iMyoblast vs S1	BP	Down	GO:0106118	regulation of sterol biosynthetic process	40	1	18	0.924992	2.81297e-11	1	4.3958e-08	SEC14L2	SQLE, APOE, HMGCS1, SCD, HMGCR, FASN, IDI1, TM7SF2, FDFT1, LSS, ACACA, MVD, FDPS, DHCR7, SREBF2, ELOVL6, CYP51A1, MVK
iMyoblast vs S1	BP	Down	GO:0090181	regulation of cholesterol metabolic process	50	2	20	0.844325	5.79754e-11	1	8.41264e-08	ACADVL, SEC14L2	SQLE, APOE, HMGCS1, SCD, HMGCR, FASN, IDI1, TM7SF2, FDFT1, LSS, ACACA, LDLR, MVD, FDPS, DHCR7, SREBF2, ELOVL6, EPHX2, CYP51A1, MVK
iMyoblast vs S1	BP	Down	GO:0016125	sterol metabolic process	121	5	32	0.914142	9.81827e-11	1	1.32972e-07	ACADVL, G6PD, SMPD1, SEC14L2, PPARD	SQLE, APOE, HMGCS1, APOC1, MSMO1, SCD, HMGCR, FASN, IDI1, TM7SF2, DHCR24, FDFT1, LSS, ACACA, LDLR, PRKAA2, ACAT2, MVD, FDPS, ERG28, DHCR7, SREBF2, CYP1B1, SCARB1, INSIG1, ELOVL6, EPHX2, CYP51A1, CEL, MVK
iMyoblast vs S1	BP	Down	GO:1902652	secondary alcohol metabolic process	119	5	31	0.902409	2.75668e-10	1	3.50012e-07	ACADVL, G6PD, SMPD1, SEC14L2, PPARD	SQLE, APOE, HMGCS1, APOC1, MSMO1, SCD, HMGCR, FASN, IDI1, TM7SF2, DHCR24, FDFT1, LSS, ACACA, LDLR, PRKAA2, ACAT2, MVD, FDPS, ERG28, DHCR7, SREBF2, IDH1, SCARB1, INSIG1, ELOVL6, EPHX2, CYP51A1, CEL, MVK
iMyoblast vs S1	BP	Down	GO:0046165	alcohol biosynthetic process	128	8	32	0.625027	5.04625e-10	1	6.03027e-07	G6PD, FGF2, PTS, PLCG2, SEC14L2, HRH1, DKK3, SPHK1	SQLE, APOE, HMGCS1, MSMO1, SCD, ITPKA, HMGCR, FASN, IDI1, TM7SF2, DHCR24, FDFT1, LSS, ACACA, PRKAA2, ACAT2, MVD, FDPS, ASAH1, ERG28, DHCR7, SREBF2, BMP5, P2RY1, INSIG1, ELOVL6, CYP51A1, MVK, ISYNA1, ITPKB
iMyoblast vs S1	BP	Down	GO:0001822	kidney development	224	26	45	0.00525239	6.33249e-10	0.130284	7.14691e-07	GCNT1, TGFB1, KIRREL3, SERPINB7, FOXD1, FOXC2, PGF, SMAD7, ITGA3, FSTL3, SIM1, FGF2, FBN1, KANK2, C1GALT1, NKX3-1, BMPER, SMAD6, PODXL, NRP1, MYO1E, AGTR1, WWTR1, ID2, SMAD3, SIX1	LIN28A, GPC3, WNT2B, BMP4, SPRY1, PTCH1, GDF11, SLIT2, ACVR2B, PDGFD, SULF2, BCL2L11, BMP7, RIDA, ROBO2, MME, GLI3, FGFR2, NOTCH3, PRKX, PROX1, TGFB2, RDH10, SOX11, ARG2, PPAT, SOX4, FOXC1, FRAS1, PCSK5
iMyoblast vs S1	BP	Down	GO:1902930	regulation of alcohol biosynthetic process	56	3	20	0.722805	9.24096e-10	1	9.59444e-07	SEC14L2, HRH1, DKK3	SQLE, APOE, HMGCS1, SCD, HMGCR, FASN, IDI1, TM7SF2, FDFT1, LSS, ACACA, MVD, FDPS, DHCR7, SREBF2, BMP5, P2RY1, ELOVL6, CYP51A1, MVK
iMyoblast vs S1	BP	Down	GO:0008203	cholesterol metabolic process	110	5	29	0.866155	9.44567e-10	1	9.59444e-07	ACADVL, G6PD, SMPD1, SEC14L2, PPARD	SQLE, APOE, HMGCS1, APOC1, MSMO1, SCD, HMGCR, FASN, IDI1, TM7SF2, DHCR24, FDFT1, LSS, ACACA, LDLR, PRKAA2, ACAT2, MVD, FDPS, DHCR7, SREBF2, SCARB1, INSIG1, ELOVL6, EPHX2, CYP51A1, CEL, MVK, HSD17B7
iMyoblast vs S1	CC	Up	GO:0009986	cell surface	444	79	53	6.77971e-16	0.000470212	1.3773e-11	0.0534057	ULBP2, ENG, ITGB1, CD59, TGFB1, MSN, ADAM9, HLA-E, BMPR2, CD47, CD151, AXL, MET, SIRPA, IL7R, LMO7, ITGA2, CD9, PLAUR, SEMA7A, TNFRSF12A, FURIN, ITGA3, FLOT1, TGFBR2, MAP3K5, LGALS1, TMX3, CD44, CSPG4	KCNH2, GPC3, IQGAP2, FZD3, SLC1A3, LDLR, ITGA1, CD79B, SULF2, LPAR2, BGN, SCARB1, CD74, AMOT, ROBO2, P2RY1, RAMP2, ICAM1, FZD10, MME, RTN4R, FGFR2, NOTCH3, LIPG, ROBO1, CDH3, ACHE, GPC6, ADGRG2, ADAMTS7
iMyoblast vs S1	CC	Up	GO:0009897	external side of plasma membrane	145	37	19	1.13563e-12	0.0134143	5.76757e-09	0.398993	ULBP2, ENG, ITGB1, CD59, ADAM9, HLA-E, IL7R, ITGA2, CD9, SEMA7A, ITGA3, FLOT1, TGFBR2, MAP3K5, CD274, ITGA5, CXCL12, ANTXR1, ALCAM, HLA-B, PDCD1LG2, ANTXR2, IL13RA1, HLA-A, THBS1, SSC5D, PRNP, TLR4, HLA-C, ANPEP	LDLR, ITGA1, CD79B, CD74, AMOT, ICAM1, RTN4R, CD4, ENOX1, CD83, IL2RB, SSC4D, NRCAM, GPC4, TNFRSF9, CCR10, IL6R, CD24, ENPEP
iMyoblast vs S1	CC	Up	GO:0062023	collagen-containing extracellular matrix	254	49	42	3.78989e-12	3.47599e-07	1.28836e-08	0.00015351	COL13A1, TGFB1, LTBP2, LGALS3BP, SERPINB6, CD151, EFEMP2, TGFBI, LAMB3, LTBP3, SEMA7A, LGALS1, CSPG4, FN1, CXCL12, THSD4, SERPINB8, CCDC80, LOXL1, SERPINE1, NAV2, CTSB, FBN1, TGM2, DST, COL8A1, LAMC2, CTSL, NTN4, GREM1	LAMA1, APOE, GPC3, FGFBP3, WNT2B, EMILIN2, COL9A3, TNC, LAMA2, COL2A1, FGF9, CDON, BGN, BMP7, SMOC1, MDK, COL26A1, FBLN1, TIMP3, ICAM1, A2M, COL9A2, FGFR2, TGFB2, FREM2, FRAS1, F12, ACHE, GPC6, NID2
iMyoblast vs S1	CC	Up	GO:0030055	cell-substrate junction	390	61	19	3.80516e-12	0.946311	1.28836e-08	1	ENG, ITGB1, CD59, ARHGAP22, PLEC, MSN, ADAM9, CD151, DAB2, LMO7, ITGA2, CD9, PLAUR, ITGA3, FLOT1, PXN, ACTN4, DLC1, MRC2, CD44, CSPG4, SH3KBP1, AFAP1, ITGA5, TRIOBP, PAK1, LPXN, ITGB5, ALCAM, PVR	RPS10, AIF1L, EVL, SORBS1, TNC, ITGA1, RHOU, PDLIM1, ATAT1, CNN2, ICAM1, MME, SORBS2, EPB41L5, CNN1, ACTN2, ASAP3, ACTC1, CIB2
iMyoblast vs S1	CC	Up	GO:0005925	focal adhesion	385	60	18	6.32009e-12	0.961482	1.42659e-08	1	ENG, ITGB1, CD59, ARHGAP22, PLEC, MSN, ADAM9, CD151, DAB2, LMO7, ITGA2, CD9, PLAUR, ITGA3, FLOT1, PXN, ACTN4, DLC1, MRC2, CD44, CSPG4, SH3KBP1, AFAP1, ITGA5, TRIOBP, PAK1, LPXN, ITGB5, ALCAM, PVR	RPS10, AIF1L, EVL, SORBS1, TNC, ITGA1, RHOU, PDLIM1, ATAT1, CNN2, ICAM1, MME, SORBS2, EPB41L5, CNN1, ACTN2, ASAP3, ACTC1
iMyoblast vs S1	CC	Up	GO:0098552	side of membrane	284	52	28	1.76654e-11	0.0771047	2.56751e-08	0.797602	ULBP2, ENG, ITGB1, CD59, BIRC2, GNGT2, ADAM9, G6PD, HLA-E, IL7R, ITGA2, CD9, SEMA7A, CYLD, ITGA3, FLOT1, TGFBR2, GNA11, MAP3K5, RASA3, CD274, ITGA5, CXCL12, ANTXR1, ALCAM, GNG12, HLA-B, PDCD1LG2, ANTXR2, IL13RA1	SNAP25, LDLR, ITGA1, GNAL, CD79B, CD74, AMOT, EPB41, ICAM1, RTN4R, LITAF, ANK1, CD4, SHANK3, STAC, ENOX1, CD83, IL2RB, SSC4D, NRCAM, PALM, GPC4, TNFRSF9, CCR10, IL6R, PLEKHA4, CD24, ENPEP
iMyoblast vs S1	CC	Up	GO:0031012	extracellular matrix	310	54	50	3.45713e-11	6.53843e-08	4.6821e-08	3.68967e-05	MMP1, COL13A1, TGFB1, LTBP2, LGALS3BP, SERPINB6, CD151, EFEMP2, TGFBI, LAMB3, LTBP3, SEMA7A, LGALS1, CSPG4, FN1, CXCL12, THSD4, SERPINB8, CCDC80, ELFN2, LOXL1, SERPINE1, NAV2, CTSB, FBN1, TGM2, DST, COL8A1, LAMC2, CTSL	LAMA1, APOE, LRIG1, TRIL, GPC3, FGFBP3, WNT2B, EMILIN2, COL9A3, TNC, COLEC12, LAMA2, COL2A1, FGF9, CDON, BGN, BMP7, ELFN1, SMOC1, OLFML2A, MDK, COL26A1, LRRN1, FBLN1, TIMP3, ICAM1, A2M, COL9A2, FGFR2, TGFB2
iMyoblast vs S1	CC	Up	GO:0005604	basement membrane	72	17	15	3.59197e-06	0.000200029	0.000829214	0.0335834	CD151, EFEMP2, TGFBI, LAMB3, FN1, CCDC80, LOXL1, FBN1, DST, COL8A1, LAMC2, NTN4, TIMP1, LOXL2, ANG, ITGA6, COL17A1	LAMA1, TNC, LAMA2, COL2A1, FGF9, SMOC1, FBLN1, TIMP3, COL9A2, FREM2, FRAS1, ACHE, NID2, COL7A1, HMCN1
iMyoblast vs S1	CC	Up	GO:0044853	plasma membrane raft	78	17	6	9.01819e-06	0.501234	0.00160706	1	EHD2, BMPR2, CAVIN3, CAVIN1, FLOT1, TGFBR2, DLC1, MYOF, ADD3, CAV2, CDH2, EZR, ATP2B4, CAV1, ADTRP, KCNMA1, F2R	PTCH1, SCARB1, ADD2, CAVIN4, ATP1A2, SMO
iMyoblast vs S1	CC	Up	GO:0045121	membrane raft	226	33	25	1.1442e-05	0.022487	0.00195331	0.496008	ITGB1, BIRC2, MYO1C, EHD2, BMPR2, RGMB, CAVIN3, CAVIN1, FURIN, FLOT1, TGFBR2, DLC1, ADGRG1, MYOF, MALL, SYNJ2, TRADD, ADD3, CAV2, LAMP2, PRNP, CDH2, PODXL, EZR, EGFR, SMURF2, ATP2B4, CAV1, S1PR1, ADTRP	ARID3A, GPM6B, CXADR, PTCH1, SORBS1, EFNB1, ITGA1, TNFRSF1B, BAALC, SCARB1, ICAM1, MME, RTN4R, ANK2, ADD2, CAVIN4, PAG1, INPP5D, CD4, ATP1A2, ZAP70, EDNRB, SLC9A3R1, SMO, CD24
iMyoblast vs S1	CC	Up	GO:0098857	membrane microdomain	227	33	25	1.24767e-05	0.0235083	0.00203732	0.505902	ITGB1, BIRC2, MYO1C, EHD2, BMPR2, RGMB, CAVIN3, CAVIN1, FURIN, FLOT1, TGFBR2, DLC1, ADGRG1, MYOF, MALL, SYNJ2, TRADD, ADD3, CAV2, LAMP2, PRNP, CDH2, PODXL, EZR, EGFR, SMURF2, ATP2B4, CAV1, S1PR1, ADTRP	ARID3A, GPM6B, CXADR, PTCH1, SORBS1, EFNB1, ITGA1, TNFRSF1B, BAALC, SCARB1, ICAM1, MME, RTN4R, ANK2, ADD2, CAVIN4, PAG1, INPP5D, CD4, ATP1A2, ZAP70, EDNRB, SLC9A3R1, SMO, CD24
iMyoblast vs S1	CC	Up	GO:0043235	receptor complex	232	35	34	2.0288e-05	0.000338665	0.0029866	0.0439836	ENG, ITGB1, BIRC2, BMPR2, GPRC5A, AXL, MET, ITGA2, ITGA3, TGFBR2, CD44, EPHB2, ITGA5, PTPRB, ITGB5, ALCAM, IL13RA1, TRADD, CAPRIN2, ITPR3, ADRB2, PLXNA4, IL4R, TLR4, EGFR, NRP1, ITGB3, PLXNA2, ACVR1, ITGA6	GABRB3, TRIL, SORBS1, TM7SF2, LDLR, ITGA1, ACVR2B, CD79B, TNFRSF1B, SHISA9, CD74, OLFM2, ITGA9, EPHB3, RAMP2, GPRC5C, SYK, SLITRK5, MERTK, FGFR2, NOTCH3, CD4, SHANK3, GRIA1, GRIK4, ZAP70, ADRA2A, IL2RB, GPR20, NR1H3
iMyoblast vs S1	CC	Up	GO:0098589	membrane region	235	33	25	2.41196e-05	0.0328359	0.00330746	0.587719	ITGB1, BIRC2, MYO1C, EHD2, BMPR2, RGMB, CAVIN3, CAVIN1, FURIN, FLOT1, TGFBR2, DLC1, ADGRG1, MYOF, MALL, SYNJ2, TRADD, ADD3, CAV2, LAMP2, PRNP, CDH2, PODXL, EZR, EGFR, SMURF2, ATP2B4, CAV1, S1PR1, ADTRP	ARID3A, GPM6B, CXADR, PTCH1, SORBS1, EFNB1, ITGA1, TNFRSF1B, BAALC, SCARB1, ICAM1, MME, RTN4R, ANK2, ADD2, CAVIN4, PAG1, INPP5D, CD4, ATP1A2, ZAP70, EDNRB, SLC9A3R1, SMO, CD24
iMyoblast vs S1	CC	Up	GO:0098797	plasma membrane protein complex	322	43	34	2.66765e-05	0.0370601	0.00356535	0.623757	COL13A1, ITGB1, BIRC2, GNGT2, HLA-E, SCN9A, ITGA2, SMAD7, ITGA3, FLOT1, GNA11, KCNK6, LIN7B, ITGA5, SGCB, ITGB5, ALCAM, GNG12, HLA-B, FZD8, IL13RA1, TRADD, SCN1B, HLA-A, KCNG1, CDH2, CACNA1A, EGFR, CDH4, KCNQ3	KCNQ2, KCNH2, IGF1, SORBS1, SNAP25, ITGA1, GNAL, ACVR2B, CD79B, CACHD1, SHISA9, CD74, OLFM2, ITGA9, RAMP2, SYK, CDH3, CACNA1C, RYR1, CD4, KCNMB4, ATP1A2, SHANK3, GRIA1, GRIK4, ZAP70, CDHR3, IL2RB, KCNF1, HSPA2
iMyoblast vs S1	CC	Up	GO:0005901	caveola	61	14	5	2.95046e-05	0.45484	0.00381774	1	EHD2, BMPR2, CAVIN3, CAVIN1, FLOT1, TGFBR2, DLC1, MYOF, CAV2, ATP2B4, CAV1, ADTRP, KCNMA1, F2R	PTCH1, SCARB1, CAVIN4, ATP1A2, SMO
iMyoblast vs S1	CC	Up	GO:0045177	apical part of cell	229	33	21	3.76585e-05	0.210777	0.00463656	1	MSN, F2RL2, ATP8B1, BMPR2, LMO7, TCHP, CD9, MYO6, CD44, CSPG4, OXTR, FN1, NF2, SLC9A3R2, ITPR3, CLDN1, RAPGEF2, TCIRG1, ADRB2, SIPA1L3, PLAT, CDH2, SLC4A2, PODXL, EZR, EGFR, ACVR1, MYO7B, KCNMA1, OSMR	FZD3, DYNC2H1, LDLR, SHROOM3, HOMER1, PARD6B, P2RY1, AMOTL1, ANK2, CRB2, SORBS2, ADGRG2, JAG1, EDA, STK26, SLC29A4, SLC9A3R1, IL6R, VASH1, IGFBP2, ENPEP
iMyoblast vs S1	CC	Up	GO:0005788	endoplasmic reticulum lumen	229	31	17	6.99851e-05	0.470472	0.00736657	1	COL13A1, EVA1A, P4HA2, CKAP4, QSOX1, TGOLN2, PNPLA2, PLAUR, CERCAM, P4HA1, IGFBP3, LGALS1, FSTL3, FN1, TOR1A, ERLEC1, FBN1, TOR4A, COL8A1, FSTL1, THBS1, CYR61, CDH2, STC2, FAM20C, TIMP1, ERAP2, IGFBP7, WNT5B, COL5A2	APOE, GPC3, BMP4, NOTUM, VGF, COL9A3, TNC, COL2A1, PDGFD, COL26A1, COL9A2, KDELC1, ADAMTS7, CD4, COL23A1, SDC2, COL7A1
iMyoblast vs S1	CC	Up	GO:0008305	integrin complex	25	8	2	0.000177286	0.574874	0.0137637	1	ITGB1, ITGA2, ITGA3, ITGA5, ITGB5, ITGB3, ITGA6, ITGBL1	ITGA1, ITGA9
iMyoblast vs S1	CC	Up	GO:0098636	protein complex involved in cell adhesion	25	8	2	0.000177286	0.574874	0.0137637	1	ITGB1, ITGA2, ITGA3, ITGA5, ITGB5, ITGB3, ITGA6, ITGBL1	ITGA1, ITGA9
iMyoblast vs S1	CC	Up	GO:0071437	invadopodium	15	6	0	0.000177508	1	0.0137637	1	ITGB1, MSN, PLAUR, ITGA3, PAK1, EZR
iMyoblast vs S1	CC	Down	GO:0031012	extracellular matrix	310	54	50	3.45713e-11	6.53843e-08	4.6821e-08	3.68967e-05	MMP1, COL13A1, TGFB1, LTBP2, LGALS3BP, SERPINB6, CD151, EFEMP2, TGFBI, LAMB3, LTBP3, SEMA7A, LGALS1, CSPG4, FN1, CXCL12, THSD4, SERPINB8, CCDC80, ELFN2, LOXL1, SERPINE1, NAV2, CTSB, FBN1, TGM2, DST, COL8A1, LAMC2, CTSL	LAMA1, APOE, LRIG1, TRIL, GPC3, FGFBP3, WNT2B, EMILIN2, COL9A3, TNC, COLEC12, LAMA2, COL2A1, FGF9, CDON, BGN, BMP7, ELFN1, SMOC1, OLFML2A, MDK, COL26A1, LRRN1, FBLN1, TIMP3, ICAM1, A2M, COL9A2, FGFR2, TGFB2
iMyoblast vs S1	CC	Down	GO:0062023	collagen-containing extracellular matrix	254	49	42	3.78989e-12	3.47599e-07	1.28836e-08	0.00015351	COL13A1, TGFB1, LTBP2, LGALS3BP, SERPINB6, CD151, EFEMP2, TGFBI, LAMB3, LTBP3, SEMA7A, LGALS1, CSPG4, FN1, CXCL12, THSD4, SERPINB8, CCDC80, LOXL1, SERPINE1, NAV2, CTSB, FBN1, TGM2, DST, COL8A1, LAMC2, CTSL, NTN4, GREM1	LAMA1, APOE, GPC3, FGFBP3, WNT2B, EMILIN2, COL9A3, TNC, LAMA2, COL2A1, FGF9, CDON, BGN, BMP7, SMOC1, MDK, COL26A1, FBLN1, TIMP3, ICAM1, A2M, COL9A2, FGFR2, TGFB2, FREM2, FRAS1, F12, ACHE, GPC6, NID2
iMyoblast vs S1	CC	Down	GO:0005604	basement membrane	72	17	15	3.59197e-06	0.000200029	0.000829214	0.0335834	CD151, EFEMP2, TGFBI, LAMB3, FN1, CCDC80, LOXL1, FBN1, DST, COL8A1, LAMC2, NTN4, TIMP1, LOXL2, ANG, ITGA6, COL17A1	LAMA1, TNC, LAMA2, COL2A1, FGF9, SMOC1, FBLN1, TIMP3, COL9A2, FREM2, FRAS1, ACHE, NID2, COL7A1, HMCN1
iMyoblast vs S1	CC	Down	GO:0043235	receptor complex	232	35	34	2.0288e-05	0.000338665	0.0029866	0.0439836	ENG, ITGB1, BIRC2, BMPR2, GPRC5A, AXL, MET, ITGA2, ITGA3, TGFBR2, CD44, EPHB2, ITGA5, PTPRB, ITGB5, ALCAM, IL13RA1, TRADD, CAPRIN2, ITPR3, ADRB2, PLXNA4, IL4R, TLR4, EGFR, NRP1, ITGB3, PLXNA2, ACVR1, ITGA6	GABRB3, TRIL, SORBS1, TM7SF2, LDLR, ITGA1, ACVR2B, CD79B, TNFRSF1B, SHISA9, CD74, OLFM2, ITGA9, EPHB3, RAMP2, GPRC5C, SYK, SLITRK5, MERTK, FGFR2, NOTCH3, CD4, SHANK3, GRIA1, GRIK4, ZAP70, ADRA2A, IL2RB, GPR20, NR1H3
iMyoblast vs S1	CC	Down	GO:0009986	cell surface	444	79	53	6.77971e-16	0.000470212	1.3773e-11	0.0534057	ULBP2, ENG, ITGB1, CD59, TGFB1, MSN, ADAM9, HLA-E, BMPR2, CD47, CD151, AXL, MET, SIRPA, IL7R, LMO7, ITGA2, CD9, PLAUR, SEMA7A, TNFRSF12A, FURIN, ITGA3, FLOT1, TGFBR2, MAP3K5, LGALS1, TMX3, CD44, CSPG4	KCNH2, GPC3, IQGAP2, FZD3, SLC1A3, LDLR, ITGA1, CD79B, SULF2, LPAR2, BGN, SCARB1, CD74, AMOT, ROBO2, P2RY1, RAMP2, ICAM1, FZD10, MME, RTN4R, FGFR2, NOTCH3, LIPG, ROBO1, CDH3, ACHE, GPC6, ADGRG2, ADAMTS7
iMyoblast vs S1	CC	Down	GO:0030175	filopodium	92	13	16	0.00714988	0.000932889	0.160751	0.0834874	ITGB1, MSN, MYO6, ITGA3, ANTXR1, NF2, MYO5A, KITLG, PODXL, EZR, ITGB3, ITGA6, EPHB1	CXADR, PPP1R9A, IQGAP2, IGF2BP1, FZD3, TENM2, GAP43, FMR1, ACTA2, DNALI1, ACTN2, UNC5C, ARL4C, ACTC1, SLC9A3R1, PALM
iMyoblast vs S1	CC	Down	GO:0032591	dendritic spine membrane	8	0	4	1	0.00259909	1	0.162965		SHISA9, GRIA1, MPP2, PALM
iMyoblast vs S1	CC	Down	GO:0097060	synaptic membrane	266	21	34	0.336005	0.00317595	1	0.189206	SLC16A3, COL13A1, ITGB1, NRGN, ITGA3, EPHB2, LIN7B, DRP2, STX2, KCTD16, SLC8A1, CDH2, FOSL1, ATP2B4, ZNRF2, SHC4, NRP1, COMT, ADAM23, KCNMA1, F2R	GABRB3, SNAP25, CPE, TENM2, NSMF, BAALC, SHISA9, HOMER1, OLFM2, CNKSR2, NETO1, P2RY1, EFNB3, ANK2, FMR1, LRRC4C, CACNA1C, NECTIN1, ANK1, ZC4H2, ANK3, SHANK3, GRIA1, ACTN2, GRIK4, FXYD6, KCTD12, NSG1, MPP2, NRCAM
iMyoblast vs S1	CC	Down	GO:0043194	axon initial segment	14	2	5	0.262249	0.00326825	1	0.191295	NAV1, KCNQ3	KCNQ2, ANK2, ANK1, ANK3, NRCAM
iMyoblast vs S1	CC	Down	GO:0043202	lysosomal lumen	75	5	13	0.576768	0.00340937	1	0.196765	SMPD1, CSPG4, CTSB, CTSL, LAMP2	GPC3, NEU1, GYG1, ASAH1, BGN, CD74, TCN2, GPC6, SDC2, NSG1, GPC4, EPDR1, GAA
iMyoblast vs S1	CC	Down	GO:0099061	integral component of postsynaptic density membrane	26	1	7	0.864459	0.00394221	1	0.209176	SLC16A3	SHISA9, NETO1, EFNB3, LRRC4C, GRIA1, NRCAM, CLSTN2
iMyoblast vs S1	CC	Down	GO:1902495	transmembrane transporter complex	143	12	21	0.338698	0.00475012	1	0.22935	SCN9A, MCUB, KCNK6, SCN1B, KCNG1, CACNA1A, KCNQ3, LRRC8C, CATSPER1, ABCA2, KCNMA1, KCNE4	KCNQ2, GABRB3, KCNH2, SNAP25, CACHD1, SHISA9, PIDD1, OLFM2, LRRC8B, CACNA1C, RYR1, KCNMB4, ATP1A2, SHANK3, GRIA1, GRIK4, UNC80, KCNF1, HSPA2, KCNJ8, KCNJ14
iMyoblast vs S1	CC	Down	GO:0034702	ion channel complex	134	11	20	0.382678	0.00508801	1	0.233853	SCN9A, MCUB, KCNK6, SCN1B, KCNG1, CACNA1A, KCNQ3, LRRC8C, CATSPER1, KCNMA1, KCNE4	KCNQ2, GABRB3, KCNH2, SNAP25, CACHD1, SHISA9, PIDD1, OLFM2, LRRC8B, CACNA1C, RYR1, KCNMB4, SHANK3, GRIA1, GRIK4, UNC80, KCNF1, HSPA2, KCNJ8, KCNJ14
iMyoblast vs S1	CC	Down	GO:0034703	cation channel complex	99	10	16	0.184798	0.00557706	0.937315	0.242089	SCN9A, MCUB, KCNK6, SCN1B, KCNG1, CACNA1A, KCNQ3, CATSPER1, KCNMA1, KCNE4	KCNQ2, KCNH2, SNAP25, CACHD1, SHISA9, OLFM2, CACNA1C, RYR1, KCNMB4, GRIA1, GRIK4, UNC80, KCNF1, HSPA2, KCNJ8, KCNJ14
iMyoblast vs S1	CC	Down	GO:0098984	neuron to neuron synapse	266	11	32	0.97678	0.00587103	1	0.252691	SLC16A3, BMPR2, NRGN, LIN7B, DRP2, RTN4, ADD3, PRNP, CDH2, BNIP3, SPOCK1	PPP1R9A, MT-ND2, CDK5R1, PTCH1, NSMF, DCLK1, BAALC, SHISA9, HOMER1, SYNGAP1, CNKSR2, NETO1, P2RY1, GAP43, EPB41, EFNB3, FMR1, ADD2, LRRC4C, CACNA1C, NECTIN1, MAPK8IP2, SHANK3, GRIA1, ACTN2, GRIK4, MPP2, NRCAM, PALM, CLSTN2
iMyoblast vs S1	CC	Down	GO:0099146	intrinsic component of postsynaptic density membrane	28	1	7	0.882278	0.00595659	1	0.254754	SLC16A3	SHISA9, NETO1, EFNB3, LRRC4C, GRIA1, NRCAM, CLSTN2
iMyoblast vs S1	CC	Down	GO:0098794	postsynapse	433	28	47	0.622152	0.00598713	1	0.255515	SLC16A3, COL13A1, ITGB1, BMPR2, NRGN, EPHB2, LIN7B, DRP2, RTN4, ADGRB3, KCTD16, SLC8A1, OPHN1, PURA, ADD3, MYO5A, NEDD4, PALMD, PRNP, CDH2, BNIP3, SHC4, NRP1, LPAR1, COMT, SPOCK1, KCNMA1, F2R	GABRB3, PPP1R9A, ITPKA, MT-ND2, CDK5R1, IGF2BP1, PTCH1, SNAP25, MYH10, LAMA2, TENM2, NSMF, DCLK1, BAALC, SHISA9, NEFL, HOMER1, SYNGAP1, CNKSR2, NETO1, P2RY1, GAP43, EPB41, EFNB3, ANK2, FMR1, ADD2, LRRC4C, CACNA1C, MAPK8IP2
iMyoblast vs S1	CC	Down	GO:0098802	plasma membrane signaling receptor complex	111	14	17	0.0267607	0.00624335	0.366337	0.259905	ITGB1, BIRC2, ITGA2, ITGA3, ITGA5, ITGB5, ALCAM, IL13RA1, ITGB3, ACVR1, ITGA6, APBB1IP, ITGBL1, OSMR	SORBS1, ITGA1, ACVR2B, CD79B, SHISA9, OLFM2, ITGA9, RAMP2, SYK, CD4, SHANK3, GRIA1, GRIK4, ZAP70, IL2RB, IL6R, CALCRL
iMyoblast vs S1	CC	Down	GO:0045211	postsynaptic membrane	197	14	26	0.542439	0.0063421	1	0.262403	SLC16A3, COL13A1, NRGN, EPHB2, LIN7B, DRP2, KCTD16, SLC8A1, CDH2, SHC4, NRP1, COMT, KCNMA1, F2R	GABRB3, TENM2, NSMF, BAALC, SHISA9, HOMER1, CNKSR2, NETO1, P2RY1, EFNB3, ANK2, FMR1, LRRC4C, CACNA1C, ANK1, ZC4H2, ANK3, SHANK3, GRIA1, ACTN2, GRIK4, FXYD6, KCTD12, NSG1, NRCAM, CLSTN2
iMyoblast vs S1	CC	Down	GO:0031932	TORC2 complex	11	0	4	1	0.00648575	1	0.265107		SESN3, PRR5, SESN1, SESN2
iMyoblast vs S1	MF	Up	GO:0038023	signaling receptor activity	465	73	70	1.17585e-10	9.37732e-08	1.20275e-07	4.88462e-05	GPR176, ENG, ITGB1, NR3C1, F2RL2, BMPR2, RGMB, GPRC5A, CD47, AXL, MET, IL7R, ITGA2, CRIM1, PLAUR, TGFBR2, NR1D2, ADGRG1, MRC2, CD44, EPHB2, OXTR, PTPRB, ANTXR1, ITGB5, PTGER1, PVR, FZD8, NR1H2, ADGRB3	PRTG, LEF1, NR6A1, GABRB3, ZNF219, FZD3, PTCH1, PTPRD, ACVR2B, CD79B, TNFRSF1B, MMD, IL17RD, LPAR3, LPAR2, MCC, SCARB1, ADGRL2, CD74, PTPRG, AMOT, ROBO2, EPHB3, P2RY1, RAMP2, GPRC5C, ICAM1, FZD10, EFNB3, MERTK
iMyoblast vs S1	MF	Up	GO:0060089	molecular transducer activity	465	73	70	1.17585e-10	9.37732e-08	1.20275e-07	4.88462e-05	GPR176, ENG, ITGB1, NR3C1, F2RL2, BMPR2, RGMB, GPRC5A, CD47, AXL, MET, IL7R, ITGA2, CRIM1, PLAUR, TGFBR2, NR1D2, ADGRG1, MRC2, CD44, EPHB2, OXTR, PTPRB, ANTXR1, ITGB5, PTGER1, PVR, FZD8, NR1H2, ADGRB3	PRTG, LEF1, NR6A1, GABRB3, ZNF219, FZD3, PTCH1, PTPRD, ACVR2B, CD79B, TNFRSF1B, MMD, IL17RD, LPAR3, LPAR2, MCC, SCARB1, ADGRL2, CD74, PTPRG, AMOT, ROBO2, EPHB3, P2RY1, RAMP2, GPRC5C, ICAM1, FZD10, EFNB3, MERTK
iMyoblast vs S1	MF	Up	GO:0050840	extracellular matrix binding	47	18	6	2.02279e-10	0.111653	1.95681e-07	0.910205	PLEKHA2, ITGB1, ADAM9, TGFBI, ITGA2, ITGA3, LGALS1, ADGRG1, NTN4, THBS1, SSC5D, CYR61, TINAGL1, ITGB3, ECM1, ITGA6, SPOCK1, CLEC14A	SLIT2, BGN, SMOC1, ITGA9, OLFML2A, ACHE
iMyoblast vs S1	MF	Up	GO:0005178	integrin binding	102	26	7	1.0517e-09	0.608187	9.28923e-07	1	ITGB1, ADAM9, CD151, TGFBI, ITGA2, CD9, SEMA7A, ITGA3, PXN, ACTN4, ITGA5, FN1, CXCL12, ITGB5, FGF2, FBN1, DST, THBS1, CYR61, EGFR, EDIL3, ITGB3, LTBP4, ADAM23, ITGBL1, MMP14	CXADR, IGF1, SYK, ICAM1, SFRP2, ACTN2, CIB2
iMyoblast vs S1	MF	Up	GO:0005518	collagen binding	52	18	6	1.92794e-09	0.169423	1.50639e-06	1	ITGB1, ADAM9, TGFBI, ITGA2, SMAD7, ITGA3, ADGRG1, MRC2, CD44, FN1, ANTXR1, PAK1, CTSB, CTSL, THBS1, C1QTNF1, SPOCK1, SMAD3	ITGA1, ITGA9, ACHE, NID2, MMP9, PCOLCE
iMyoblast vs S1	MF	Up	GO:0043236	laminin binding	24	12	3	4.4596e-09	0.229124	3.12402e-06	1	PLEKHA2, ITGB1, ADAM9, ITGA2, ITGA3, LGALS1, NTN4, THBS1, SSC5D, TINAGL1, ECM1, ITGA6	SLIT2, ITGA9, ACHE
iMyoblast vs S1	MF	Up	GO:0050839	cell adhesion molecule binding	434	57	31	3.7822e-08	0.44633	2.25987e-05	1	ITGB1, PLEC, MSN, ADAM9, BMPR2, GPRC5A, CD151, TGFBI, CAST, ITGA2, TMOD3, PLIN3, CD9, SEMA7A, ITGA3, PPP1R13L, LRRFIP1, PXN, ACTN4, RANGAP1, TAGLN2, CTNNAL1, FAM129B, ITGA5, PTPRB, TBC1D2, FN1, CXCL12, ITGB5, RTN4	CXADR, IGF1, CDK5R1, FASN, PTPRD, CPE, EIF3E, STXBP6, TENM2, PDLIM1, CGN, IDH1, CNN2, SYK, ICAM1, NOTCH3, LRRC4C, ARVCF, CDH3, TENM4, NECTIN1, SFRP2, PPL, ANK3, ACTN2, CDHR3, TENM3, PKP2, HMCN1, CIB2
iMyoblast vs S1	MF	Up	GO:0004888	transmembrane signaling receptor activity	345	53	52	1.31682e-07	1.0156e-05	5.9447e-05	0.00361963	GPR176, ENG, F2RL2, BMPR2, GPRC5A, AXL, MET, IL7R, ITGA2, CRIM1, TGFBR2, ADGRG1, MRC2, CD44, EPHB2, OXTR, PTPRB, ANTXR1, PTGER1, FZD8, ADGRB3, ANTXR2, IL13RA1, SSTR1, GPR1, EVI2A, ADRB2, PLXNA4, DNER, EFEMP1	GABRB3, ZNF219, FZD3, PTCH1, PTPRD, ACVR2B, CD79B, TNFRSF1B, IL17RD, LPAR3, LPAR2, ADGRL2, CD74, PTPRG, ROBO2, EPHB3, P2RY1, RAMP2, GPRC5C, ICAM1, FZD10, EFNB3, MERTK, RTN4R, FGFR2, ADGRL3, ROBO1, CLEC1A, LPAR4, NPR3
iMyoblast vs S1	MF	Up	GO:0001968	fibronectin binding	23	10	2	3.96233e-07	0.46958	0.000157833	1	PLEKHA2, ITGB1, ITGA3, IGFBP3, FSTL3, CCDC80, CTSL, THBS1, SSC5D, ITGB3	FBLN1, SFRP2
iMyoblast vs S1	MF	Up	GO:0005126	cytokine receptor binding	149	28	17	9.84524e-07	0.0619158	0.000312509	0.761794	VEGFC, ENG, TGFB1, PGF, SMAD7, TGFBR2, CLCF1, ITGA5, CXCL12, IL11, TRADD, CXCL8, JAK1, NOL3, SH2B3, CCL26, INHBA, KITLG, SMAD6, GREM1, SMURF2, TNFSF12, ITGB3, ECM1, IL18, IL15, SMAD3, IFNE	SOCS2, BMP4, CADM4, RASL11B, GDF11, CERS1, ACVR2B, CXCL14, BMP7, PIK3R1, PIDD1, BMP5, GDF6, SYK, TGFB2, EDA, IL6R
iMyoblast vs S1	MF	Up	GO:0003779	actin binding	345	46	31	2.63762e-06	0.120509	0.000653454	0.951814	ITGB1, MYO1C, PLEC, MSN, SMTN, TMOD3, FBXO25, MYO6, WIPF1, ACTN4, PXK, CTNNAL1, TMSB10, AFAP1, MYPN, TRIOBP, ANTXR1, NF2, HCLS1, DST, OPHN1, PDLIM2, ADD3, MYO5A, NEXN, MICAL2, ABLIM3, GAS2L3, ZNF185, EZR	PPP1R9A, AIF1L, LMOD1, EVL, IQGAP2, CDK5R1, DAAM1, SORBS1, MED28, SHROOM3, ABLIM1, MYH10, GAS7, VASH2, PDLIM1, CGN, NEBL, CNN2, EPB41, ADD2, LIMCH1, MYH2, MYOZ3, SPIRE2, TNNC1, SHANK3, CNN1, ACTN2, MTSS1L, ACTR3B
iMyoblast vs S1	MF	Up	GO:0003823	antigen binding	23	9	1	7.52525e-06	0.823037	0.00140253	1	TGFB1, HLA-E, SIRPA, IL7R, HLA-B, HLA-A, TAP1, TAPBP, HLA-C	DHCR24
iMyoblast vs S1	MF	Up	GO:0030246	carbohydrate binding	135	24	19	9.75598e-06	0.00511617	0.00169396	0.234088	ENG, GALNT10, P4HA2, G6PD, UAP1, UGP2, P4HA1, LGALS1, TALDO1, MRC2, GALNT2, GALNT6, CRYBG1, GALK1, ALPK1, CRYBG3, PTX3, PLOD2, GALNT5, TINAGL1, GALNT3, LOXL2, ENPP1, CLEC14A	LGALSL, GALNT17, COLEC12, ATRNL1, PYGL, CRYBG2, ADGRL2, ASGR1, GALNT13, SORD, ADGRL3, CLEC1A, NECTIN1, SBSPON, ENPP2, SLC2A3, KLRG1, GAA, ADGRL1
iMyoblast vs S1	MF	Up	GO:0005096	GTPase activator activity	217	32	19	3.93746e-05	0.3082	0.00478979	1	ARHGAP22, DOCK5, RGS4, GNB5, STARD13, TBC1D9, DLC1, RANGAP1, RASA3, ARFGAP3, TBC1D2, ADGRB3, RASA1, OPHN1, GIT2, RAPGEF2, ARHGAP24, SIPA1L3, ASAP2, ARHGEF10L, ARHGEF12, NRP1, EVI5L, ARHGAP29, RACGAP1, ECT2, PREX1, ARHGDIB, ARHGAP31, TBC1D2B	ADAP2, RGS16, ARHGAP28, PREX2, ARHGAP42, SRGAP3, CHN2, ARHGAP45, SYNGAP1, SGSM2, RINL, AGAP1, TBC1D16, CHN1, SIPA1L2, RALGAPA2, ARHGAP6, ASAP3, MTSS1L
iMyoblast vs S1	MF	Up	GO:0019838	growth factor binding	105	19	10	4.54126e-05	0.229587	0.00522476	1	ENG, LTBP2, BMPR2, CRIM1, LTBP3, FURIN, TGFBR2, IGFBP3, THBS1, CYR61, EGFR, NRP1, ITGB3, ACVR1, SORT1, IGFBP7, LTBP4, ITGA6, OSMR	WFIKKN1, FGFBP3, COL2A1, ACVR2B, A2M, FGFR2, IL2RB, IL6R, IGFBP2, NTRK2
iMyoblast vs S1	MF	Up	GO:0005539	glycosaminoglycan binding	130	22	17	4.55221e-05	0.0149512	0.00522476	0.414564	COL13A1, ENG, LTBP2, PGF, TGFBR2, ADGRG1, CD44, FN1, CCDC80, FGF2, NAV2, FBN1, HBEGF, FSTL1, LAMC2, THBS1, CYR61, PRNP, CFH, NRP1, ANG, LTBP4	APOE, FGFBP3, BMP4, PTCH1, SLIT2, FGF9, SULF2, BGN, BMP7, PODXL2, MDK, RTN4R, FGFR2, LIPG, CEL, PCOLCE, LRTM1
iMyoblast vs S1	MF	Up	GO:0005201	extracellular matrix structural constituent	113	20	18	5.80307e-05	0.00165702	0.0063724	0.121686	COL13A1, LTBP2, EFEMP2, TGFBI, LAMB3, FN1, THSD4, FBN1, COL8A1, LAMC2, THBS1, EFEMP1, CYR61, TINAGL1, EDIL3, ECM1, IGFBP7, LTBP4, COL5A2, COL17A1	LAMA1, EMILIN2, COL9A3, TNC, LAMA2, COL2A1, BGN, FBLN1, COL9A2, FRAS1, NID2, SBSPON, CD4, COL23A1, PCOLCE, COL7A1, HMCN1, FBN2
iMyoblast vs S1	MF	Up	GO:0048018	receptor ligand activity	200	30	26	6.6525e-05	0.00689695	0.00707568	0.271534	VEGFC, TGFB1, FGF5, PGF, SEMA7A, CLCF1, CXCL12, FGF2, IL11, FBN1, CXCL8, SEMA4B, SEMA3C, HBEGF, CCL26, INHBA, DKK1, KITLG, GREM1, EFEMP1, CGA, STC2, TNFSF12, TIMP1, IL18, IL15, PTHLH, OSGIN2, OSGIN1, IFNE	C1QTNF4, BMP4, IGF1, VGF, GDF11, CERS1, FAM3C, FGF9, CXCL14, SEMA6A, SEMA6B, PDGFD, BMP7, MDK, BMP5, CMTM3, GDF6, TGFB2, IL24, SFRP2, JAG1, NPPB, EDN3, FGF18, ADM, IL6R
iMyoblast vs S1	MF	Up	GO:0042605	peptide antigen binding	13	6	1	9.61709e-05	0.629213	0.00916629	1	HLA-E, HLA-B, HLA-A, TAP1, TAPBP, HLA-C	DHCR24
iMyoblast vs S1	MF	Up	GO:0030546	signaling receptor activator activity	204	30	26	9.65585e-05	0.00889056	0.00916629	0.302026	VEGFC, TGFB1, FGF5, PGF, SEMA7A, CLCF1, CXCL12, FGF2, IL11, FBN1, CXCL8, SEMA4B, SEMA3C, HBEGF, CCL26, INHBA, DKK1, KITLG, GREM1, EFEMP1, CGA, STC2, TNFSF12, TIMP1, IL18, IL15, PTHLH, OSGIN2, OSGIN1, IFNE	C1QTNF4, BMP4, IGF1, VGF, GDF11, CERS1, FAM3C, FGF9, CXCL14, SEMA6A, SEMA6B, PDGFD, BMP7, MDK, BMP5, CMTM3, GDF6, TGFB2, IL24, SFRP2, JAG1, NPPB, EDN3, FGF18, ADM, IL6R
iMyoblast vs S1	MF	Down	GO:0038023	signaling receptor activity	465	73	70	1.17585e-10	9.37732e-08	1.20275e-07	4.88462e-05	GPR176, ENG, ITGB1, NR3C1, F2RL2, BMPR2, RGMB, GPRC5A, CD47, AXL, MET, IL7R, ITGA2, CRIM1, PLAUR, TGFBR2, NR1D2, ADGRG1, MRC2, CD44, EPHB2, OXTR, PTPRB, ANTXR1, ITGB5, PTGER1, PVR, FZD8, NR1H2, ADGRB3	PRTG, LEF1, NR6A1, GABRB3, ZNF219, FZD3, PTCH1, PTPRD, ACVR2B, CD79B, TNFRSF1B, MMD, IL17RD, LPAR3, LPAR2, MCC, SCARB1, ADGRL2, CD74, PTPRG, AMOT, ROBO2, EPHB3, P2RY1, RAMP2, GPRC5C, ICAM1, FZD10, EFNB3, MERTK
iMyoblast vs S1	MF	Down	GO:0060089	molecular transducer activity	465	73	70	1.17585e-10	9.37732e-08	1.20275e-07	4.88462e-05	GPR176, ENG, ITGB1, NR3C1, F2RL2, BMPR2, RGMB, GPRC5A, CD47, AXL, MET, IL7R, ITGA2, CRIM1, PLAUR, TGFBR2, NR1D2, ADGRG1, MRC2, CD44, EPHB2, OXTR, PTPRB, ANTXR1, ITGB5, PTGER1, PVR, FZD8, NR1H2, ADGRB3	PRTG, LEF1, NR6A1, GABRB3, ZNF219, FZD3, PTCH1, PTPRD, ACVR2B, CD79B, TNFRSF1B, MMD, IL17RD, LPAR3, LPAR2, MCC, SCARB1, ADGRL2, CD74, PTPRG, AMOT, ROBO2, EPHB3, P2RY1, RAMP2, GPRC5C, ICAM1, FZD10, EFNB3, MERTK
iMyoblast vs S1	MF	Down	GO:0004888	transmembrane signaling receptor activity	345	53	52	1.31682e-07	1.0156e-05	5.9447e-05	0.00361963	GPR176, ENG, F2RL2, BMPR2, GPRC5A, AXL, MET, IL7R, ITGA2, CRIM1, TGFBR2, ADGRG1, MRC2, CD44, EPHB2, OXTR, PTPRB, ANTXR1, PTGER1, FZD8, ADGRB3, ANTXR2, IL13RA1, SSTR1, GPR1, EVI2A, ADRB2, PLXNA4, DNER, EFEMP1	GABRB3, ZNF219, FZD3, PTCH1, PTPRD, ACVR2B, CD79B, TNFRSF1B, IL17RD, LPAR3, LPAR2, ADGRL2, CD74, PTPRG, ROBO2, EPHB3, P2RY1, RAMP2, GPRC5C, ICAM1, FZD10, EFNB3, MERTK, RTN4R, FGFR2, ADGRL3, ROBO1, CLEC1A, LPAR4, NPR3
iMyoblast vs S1	MF	Down	GO:0033218	amide binding	228	28	32	0.00127396	0.000321592	0.0533619	0.0433137	GLTP, ACADVL, HLA-E, TRHDE, ITGA2, PLEKHA3, FURIN, EPHB2, OXTR, HLA-B, SSTR1, GPR1, HLA-A, TAP1, PPIC, INHBA, ADRB2, TAPBP, PRNP, TLR4, KDELR3, CACNA1A, HLA-C, ANPEP, ERAP2, ACVR1, ANG, GSAP	APOE, PLEKHA8, LAPTM4B, FASN, DHCR24, LDLR, PANK1, PLTP, ITM2C, PCCA, PIK3R1, SCARB1, CD74, RAMP2, MME, RTN4R, LDLRAD3, TGFB2, ACHE, PCSK5, MAPK8IP2, NOLC1, NPR3, MCHR1, GRIA1, CRHBP, PNPLA3, ITM2A, EDNRB, ALDH6A1
iMyoblast vs S1	MF	Down	GO:0004930	G protein-coupled receptor activity	137	21	24	0.0012982	0.000350886	0.0540428	0.0444675	GPR176, F2RL2, GPRC5A, ADGRG1, OXTR, PTGER1, FZD8, ADGRB3, SSTR1, GPR1, ADRB2, HRH1, LPAR1, GPR68, AGTR1, FZD1, S1PR1, HTR7, F2R, GPR39, SPHK1	ZNF219, FZD3, LPAR3, LPAR2, ADGRL2, P2RY1, RAMP2, GPRC5C, FZD10, ADGRL3, LPAR4, NPR3, GPR19, MCHR1, ADGRG2, ADRA1D, CELSR3, EDNRB, ADRA2A, SMO, GPR20, CCR10, CALCRL, ADGRL1
iMyoblast vs S1	MF	Down	GO:0005160	transforming growth factor beta receptor binding	34	8	9	0.00201843	0.000883931	0.0699735	0.0816751	ENG, TGFB1, SMAD7, TGFBR2, INHBA, SMAD6, SMURF2, SMAD3	BMP4, RASL11B, GDF11, CERS1, ACVR2B, BMP7, BMP5, GDF6, TGFB2
iMyoblast vs S1	MF	Down	GO:0019825	oxygen binding	11	1	5	0.564859	0.00102763	1	0.0888357	NOX4	TDO2, CYP1B1, CBS, HBE1, CYP3A5
iMyoblast vs S1	MF	Down	GO:0004181	metallocarboxypeptidase activity	12	1	5	0.581499	0.0013761	1	0.108526	CPA4	CPXM1, CPE, AGTPBP1, VASH2, VASH1
iMyoblast vs S1	MF	Down	GO:0008083	growth factor activity	84	16	15	0.000168462	0.00154757	0.0132136	0.116896	VEGFC, TGFB1, FGF5, PGF, CLCF1, CXCL12, FGF2, IL11, HBEGF, INHBA, DKK1, KITLG, EFEMP1, TIMP1, OSGIN2, OSGIN1	BMP4, IGF1, VGF, GDF11, CERS1, FGF9, PDGFD, BMP7, MDK, BMP5, GDF6, TGFB2, JAG1, FGF18, IL6R
iMyoblast vs S1	MF	Down	GO:0035727	lysophosphatidic acid binding	4	1	3	0.24641	0.00162261	1	0.121052	LPAR1	GAP43, LPAR4, PNPLA3
iMyoblast vs S1	MF	Down	GO:0005201	extracellular matrix structural constituent	113	20	18	5.80307e-05	0.00165702	0.0063724	0.121686	COL13A1, LTBP2, EFEMP2, TGFBI, LAMB3, FN1, THSD4, FBN1, COL8A1, LAMC2, THBS1, EFEMP1, CYR61, TINAGL1, EDIL3, ECM1, IGFBP7, LTBP4, COL5A2, COL17A1	LAMA1, EMILIN2, COL9A3, TNC, LAMA2, COL2A1, BGN, FBLN1, COL9A2, FRAS1, NID2, SBSPON, CD4, COL23A1, PCOLCE, COL7A1, HMCN1, FBN2
iMyoblast vs S1	MF	Down	GO:0070915	lysophosphatidic acid receptor activity	4	1	3	0.260253	0.00194077	1	0.134749	LPAR1	LPAR3, LPAR2, LPAR4
iMyoblast vs S1	MF	Down	GO:0035014	phosphatidylinositol 3-kinase regulator activity	13	2	5	0.235828	0.0022653	1	0.147499	SOCS5, SOCS3	SOCS1, SOCS2, PIK3R3, PIK3R1, KLF4
iMyoblast vs S1	MF	Down	GO:0004180	carboxypeptidase activity	26	1	7	0.840333	0.00248178	1	0.158048	CPA4	CPXM1, CPVL, CPE, AGTPBP1, VASH2, BLMH, VASH1
iMyoblast vs S1	MF	Down	GO:0015079	potassium ion transmembrane transporter activity	58	7	12	0.143456	0.00254935	0.835428	0.16134	SLC9A7, KCNK6, MTMR6, KCNG1, KCNQ3, KCNMA1, KCNE4	KCNQ2, KCNH2, SNAP25, KCNJ12, SLC12A5, KCNMB4, ATP1A2, GRIK4, KCNF1, KCNJ8, SLC12A7, KCNJ14
iMyoblast vs S1	MF	Down	GO:0001540	amyloid-beta binding	55	7	11	0.0871759	0.00285076	0.66304	0.17449	ITGA2, EPHB2, ADRB2, PRNP, TLR4, CACNA1A, GSAP	APOE, LDLR, ITM2C, SCARB1, CD74, LDLRAD3, TGFB2, ACHE, MAPK8IP2, GRIA1, ITM2A
iMyoblast vs S1	MF	Down	GO:0016717	oxidoreductase activity, acting on paired donors, with oxidation of a pair of donors resulting in the reduction of molecular oxygen to two molecules of water	5	0	3	1	0.00285262	1	0.17449		SCD, FADS2, FADS1
iMyoblast vs S1	MF	Down	GO:0046625	sphingolipid binding	15	3	5	0.0744363	0.00354209	0.619743	0.200439	GLTP, PLEKHA3, S1PR1	LAMA1, PLEKHA8, LAPTM4B, PLTP, RTN4R
iMyoblast vs S1	MF	Down	GO:0030507	spectrin binding	21	2	6	0.425304	0.00371087	1	0.203867	ADD3, GBP1	EPB41, ANK2, ADD2, ANK1, ANK3, PDE6G
iMyoblast vs S1	MF	Down	GO:0097001	ceramide binding	10	2	4	0.131391	0.00374737	0.802952	0.204096	GLTP, PLEKHA3	PLEKHA8, LAPTM4B, PLTP, RTN4R
iMyoblast vs S1	KEGG	Up	hsa05205	Proteoglycans in cancer	174	34	19	5.138e-08	0.080723	1.72637e-05	0.691737	ITGB1, TGFB1, AKT3, MSN, MET, HIF1A, ITGA2, PLAUR, PXN, CD44, ITGA5, FN1, PAK1, ITGB5, HCLS1, FZD8, FGF2, ITPR3, PRKACB, HBEGF, PLCG2, CTSL, CAV2, THBS1, CCND1, TLR4, EZR, EGFR, ARHGEF12, ITGB3	GPC3, WNT2B, IGF1, FZD3, PTCH1, EIF4B, PIK3R3, PIK3R1, WNT16, TIMP3, FZD10, ANK2, TGFB2, TWIST1, ANK1, MMP9, ANK3, SDC2, SMO
iMyoblast vs S1	KEGG	Up	hsa04640	Hematopoietic cell lineage	35	13	5	7.71755e-07	0.156291	0.000129655	0.972475	CD59, IL7R, ITGA2, CD9, ITGA3, CD44, ITGA5, IL11, KITLG, IL4R, ANPEP, ITGB3, ITGA6	ITGA1, MME, CD4, IL6R, CD24
iMyoblast vs S1	KEGG	Up	hsa04145	Phagosome	95	20	5	6.23266e-06	0.85376	0.000698058	1	ITGB1, HLA-E, ITGA2, MRC2, TUBA4A, ITGA5, ATP6V1D, ITGB5, HLA-B, HLA-A, TAP1, TCIRG1, CTSL, LAMP2, THBS1, TLR4, TAP2, HLA-C, ITGB3, NCF2	TUBB2B, DYNC2H1, COLEC12, SCARB1, ATP6V0A1
iMyoblast vs S1	KEGG	Up	hsa04350	TGF-beta signaling pathway	78	18	8	1.09549e-05	0.286044	0.000888924	1	TGFB1, BMPR2, RGMB, SMAD9, SMAD7, TGFBR2, THSD4, FST, FBN1, INHBA, SMAD6, GREM1, THBS1, SMURF2, ACVR1, ID2, SMAD3, RBL1	E2F5, BMP4, ACVR2B, BMP7, BMP5, GDF6, TGFB2, RGMA
iMyoblast vs S1	KEGG	Up	hsa05200	Pathways in cancer	404	54	42	1.3228e-05	0.0508582	0.000888924	0.61577	VEGFC, MMP1, ITGB1, TXNRD1, TGFB1, BIRC2, AKT3, GNGT2, NFE2L2, FGF5, MET, HIF1A, GNB5, LAMB3, IL7R, ITGA2, PGF, ITGA3, TGFBR2, GNA11, NQO1, FN1, CXCL12, GNG12, PTGER1, FZD8, FGF2, IL13RA1, CXCL8, JAK1	AXIN2, LAMA1, LEF1, SKP2, WNT2B, BMP4, IGF1, RUNX1T1, FZD3, PTCH1, EML4, DAPK1, LAMA2, RAC3, FGF9, PIK3R3, LPAR3, LPAR2, BCL2L11, PIK3R1, WNT16, FZD10, BBC3, FOS, GSTA4, CCND2, GLI3, FGFR2, NOTCH3, TGFB2
iMyoblast vs S1	KEGG	Up	hsa04810	Regulation of actin cytoskeleton	167	27	14	4.28532e-05	0.410825	0.00239978	1	ITGB1, MSN, FGF5, MYL12B, ITGA2, ITGA3, PXN, ACTN4, ITGA5, FN1, CXCL12, PAK1, ITGB5, GNG12, FGF2, EZR, EGFR, ARHGEF12, ARPC1B, LPAR1, ITGB3, DIAPH3, ITGA6, RRAS2, IQGAP3, F2R, SSH3	IQGAP2, MYH10, ITGA1, RAC3, FGF9, PIK3R3, PDGFD, LPAR2, PIK3R1, CYFIP2, ITGA9, FGFR2, LPAR4, FGF18
iMyoblast vs S1	KEGG	Up	hsa00512	Mucin type O-glycan biosynthesis	20	8	2	7.32606e-05	0.514438	0.00351651	1	GCNT1, GALNT10, GALNT2, GALNT6, C1GALT1, GALNT5, GALNT3, C1GALT1C1	GALNT17, GALNT13
iMyoblast vs S1	KEGG	Up	hsa04514	Cell adhesion molecules	86	18	10	8.63398e-05	0.185129	0.00362627	1	ITGB1, HLA-E, NEGR1, ESAM, CD274, ALCAM, HLA-B, PDCD1LG2, PVR, CD58, HLA-A, CLDN1, CDH2, NRXN3, CDH4, HLA-C, ITGA6, PTPRM	CLDN6, CLDN10, ITGA9, ICAM1, LRRC4C, CDH3, NECTIN1, CD4, SDC2, NRCAM
iMyoblast vs S1	KEGG	Up	hsa05163	Human cytomegalovirus infection	171	26	6	0.000275535	0.994788	0.0102866	1	AKT3, GNGT2, HLA-E, GNB5, TMEM173, PXN, GNA11, CXCL12, GNG12, HLA-B, PTGER1, TRADD, CXCL8, ITPR3, JAK1, PRKACB, HLA-A, RB1, TAP1, TAPBP, CCND1, TAP2, EGFR, ARHGEF12, HLA-C, ITGB3	RAC3, PIK3R3, PIK3R1, MAP2K6, CDKN2A, IL6R
iMyoblast vs S1	KEGG	Up	hsa04510	Focal adhesion	172	25	16	0.000465284	0.250665	0.0156335	1	VEGFC, ITGB1, BIRC2, AKT3, MET, MYL12B, LAMB3, ITGA2, PGF, ITGA3, PXN, ACTN4, ITGA5, FN1, PAK1, ITGB5, LAMC2, CAV2, THBS1, CCND1, EGFR, SHC4, ITGB3, CAV1, ITGA6	LAMA1, IGF1, COL9A3, TNC, LAMA2, COL2A1, ITGA1, RAC3, PIK3R3, PDGFD, SHC2, PIK3R1, ITGA9, COL9A2, CCND2, MAPK10
iMyoblast vs S1	KEGG	Up	hsa04512	ECM-receptor interaction	64	13	10	0.000756351	0.0312892	0.0220642	0.500665	ITGB1, CD47, LAMB3, ITGA2, ITGA3, CD44, ITGA5, FN1, ITGB5, LAMC2, THBS1, ITGB3, ITGA6	LAMA1, COL9A3, TNC, LAMA2, COL2A1, ITGA1, ITGA9, COL9A2, FREM2, FRAS1
iMyoblast vs S1	KEGG	Up	hsa05320	Autoimmune thyroid disease	11	5	0	0.000788008	1	0.0220642	1	HLA-E, HLA-B, HLA-A, CGA, HLA-C
iMyoblast vs S1	KEGG	Up	hsa04060	Cytokine-cytokine receptor interaction	116	20	18	0.000962883	0.0117752	0.0248868	0.364349	TGFB1, BMPR2, IL7R, TNFRSF12A, TGFBR2, CLCF1, CXCL12, IL11, IL13RA1, CXCL8, CCL26, INHBA, IL4R, TNFSF12, IL18, IL17RC, ACVR1, IL15, OSMR, IFNE	BMP4, GDF11, CERS1, ACVR2B, TNFRSF1B, CXCL14, BMP7, BMP5, GDF6, TGFB2, IL24, CD4, EDA, TNFRSF19, IL2RB, TNFRSF9, CCR10, IL6R
iMyoblast vs S1	KEGG	Up	hsa04612	Antigen processing and presentation	39	9	3	0.00123498	0.577288	0.0284779	1	HLA-E, HLA-B, CTSB, HLA-A, TAP1, CTSL, TAPBP, TAP2, HLA-C	CD74, CD4, HSPA2
iMyoblast vs S1	KEGG	Up	hsa04151	PI3K-Akt signaling pathway	257	33	28	0.00130869	0.0590147	0.0284779	0.61577	VEGFC, ITGB1, AKT3, GNGT2, FGF5, MET, GNB5, LAMB3, IL7R, ITGA2, PGF, ITGA3, ITGA5, FN1, ITGB5, GNG12, FGF2, JAK1, SGK1, LAMC2, KITLG, THBS1, CCND1, IL4R, TLR4, EGFR, LPAR1, ITGB3, PPP2R5B, ITGA6	LAMA1, IGF1, COL9A3, TNC, PRKAA2, EIF4B, LAMA2, COL2A1, ITGA1, FGF9, PIK3R3, PDGFD, LPAR3, LPAR2, BCL2L11, PIK3R1, ITGA9, SYK, COL9A2, CCND2, FGFR2, LPAR4, DDIT4, FGF18, IL2RB, ANGPT2, IL6R, NTRK2
iMyoblast vs S1	KEGG	Up	hsa05414	Dilated cardiomyopathy	69	13	10	0.00135609	0.0447033	0.0284779	0.577704	ITGB1, TGFB1, ITGA2, ITGA3, LMNA, ITGA5, SGCB, ITGB5, SLC8A1, PRKACB, ITGB3, ITGA6, TPM1	LAMA1, IGF1, LAMA2, ITGA1, ITGA9, TGFB2, CACNA1C, TNNC1, DES, ACTC1
iMyoblast vs S1	KEGG	Up	hsa05323	Rheumatoid arthritis	52	11	4	0.00155122	0.630381	0.0306594	1	MMP1, TGFB1, CXCL12, ATP6V1D, IL11, CXCL8, TCIRG1, CTSL, TLR4, IL18, IL15	ICAM1, FOS, TGFB2, ATP6V0A1
iMyoblast vs S1	KEGG	Up	hsa04610	Complement and coagulation cascades	32	8	4	0.00231514	0.271541	0.043216	1	CD59, F2RL2, PLAUR, SERPINE1, PLAT, CFH, F2R, PROCR	PROS1, A2M, F12, SERPING1
iMyoblast vs S1	KEGG	Up	hsa04371	Apelin signaling pathway	103	16	7	0.00340994	0.72566	0.0603021	1	KLF2, AKT3, GNGT2, GNB5, GNG12, SERPINE1, ITPR3, SLC8A1, PRKACB, CCND1, PLAT, AGTR1, MEF2D, RRAS2, SMAD3, SPHK1	PRKAA2, PDE3B, NOTCH3, RYR1, JAG1, ACTA2, EGR1
iMyoblast vs S1	KEGG	Up	hsa05165	Human papillomavirus infection	264	32	22	0.00380973	0.4617	0.0624864	1	ITGB1, AKT3, HLA-E, LAMB3, ITGA2, ITGA3, PXN, ITGA5, FN1, ATP6V1D, ITGB5, HLA-B, FZD8, TRADD, JAK1, PRKACB, HLA-A, RB1, LAMC2, TCIRG1, TICAM1, THBS1, CCND1, EGFR, HLA-C, ITGB3, FZD1, PPP2R5B, ITGA6, WNT5B	AXIN2, LAMA1, WNT2B, FZD3, COL9A3, TNC, LAMA2, COL2A1, ITGA1, PIK3R3, PIK3R1, PARD6B, ITGA9, WNT16, FZD10, COL9A2, CCND2, NOTCH3, JAG1, ATP6V0A1, HES6, SLC9A3R1
iMyoblast vs S1	KEGG	Down	hsa00100	Steroid biosynthesis	17	0	10	1	9.12243e-08	1	3.06514e-05		SQLE, MSMO1, TM7SF2, DHCR24, FDFT1, LSS, DHCR7, CYP51A1, CEL, HSD17B7
iMyoblast vs S1	KEGG	Down	hsa00900	Terpenoid backbone biosynthesis	20	0	7	1	0.000509981	1	0.0747564		HMGCS1, HMGCR, IDI1, ACAT2, MVD, FDPS, MVK
iMyoblast vs S1	KEGG	Down	hsa04360	Axon guidance	153	21	25	0.00610498	0.000667468	0.0732598	0.0747564	ITGB1, BMPR2, MET, MYL12B, SEMA7A, EPHB2, CXCL12, PAK1, RASA1, SEMA4B, SEMA3C, PLCG2, ABLIM3, NTN4, PLXNA4, ARHGEF12, NRP1, PLXNA2, WNT5B, EPHB1, SSH3	FZD3, PTCH1, DPYSL5, SLIT2, ABLIM1, EFNB1, BOC, RAC3, SRGAP3, SEMA6A, SEMA6B, PIK3R3, BMP7, PIK3R1, PARD6B, ROBO2, EPHB3, EFNB3, LRRC4C, ROBO1, RGMA, UNC5D, UNC5C, SMO, PLXNC1
iMyoblast vs S1	KEGG	Down	hsa05217	Basal cell carcinoma	48	3	11	0.73922	0.00177902	1	0.149438	FZD8, FZD1, WNT5B	AXIN2, LEF1, WNT2B, BMP4, FZD3, PTCH1, WNT16, FZD10, GLI3, SMO, GADD45G
iMyoblast vs S1	KEGG	Down	hsa01100	Metabolic pathways	1098	76	110	0.80492	0.00540803	1	0.311452	AGPAT3, CBR3, GCNT1, ATP5ME, DPYD, GALNT10, FUT8, P4HA2, ACADVL, G6PD, GPAT3, GCLM, AOX1, UAP1, PDE8A, COX17, PNPLA2, HAGH, SMPD1, UGP2, GFPT1, P4HA1, BLVRB, TALDO1, KDSR, CBR1, NQO1, FAM213B, XDH, SQOR	SQLE, AHCY, HMGCS1, TDO2, GUCY1A2, MT-ND1, MSMO1, MT-CYB, SELENBP1, SCD, B3GNT2, GNPDA1, ITPKA, MT-ND2, HMGCR, HNMT, FASN, CHKA, NEU1, IDI1, TM7SF2, DHCR24, GALNT17, FDFT1, MGAT4C, LSS, ACACA, QPRT, DNMT3A, CA14
iMyoblast vs S1	KEGG	Down	hsa04115	p53 signaling pathway	70	8	12	0.13023	0.00713647	0.51479	0.311452	IGFBP3, SERPINE1, AIFM2, STEAP3, THBS1, CCND1, PERP, CCNE2	IGF1, SESN3, PIDD1, BBC3, CCND2, PPM1D, SESN1, CCNG1, SESN2, RPRM, CDKN2A, GADD45G
iMyoblast vs S1	KEGG	Down	hsa05206	MicroRNAs in cancer	143	15	20	0.094645	0.0075228	0.435626	0.311452	BMPR2, MET, FOXP1, CD44, ITGA5, PLCG2, THBS1, CCND1, EZR, EGFR, SHC4, ITGB3, RPS6KA5, TPM1, CCNE2	SOCS1, TRIM71, IGF2BP1, FZD3, TNC, DNMT3A, DNMT3B, PIK3R3, BCL2L11, CYP1B1, PIK3R1, TIMP3, CCND2, NOTCH3, TGFB2, SOX4, CCNG1, DDIT4, MMP9, CDKN2A
iMyoblast vs S1	KEGG	Down	hsa04979	Cholesterol metabolism	30	2	7	0.664707	0.00810747	1	0.311452	NCEH1, SORT1	APOE, APOC1, LDLR, PLTP, SCARB1, MYLIP, LIPG
iMyoblast vs S1	KEGG	Down	hsa04080	Neuroactive ligand-receptor interaction	95	13	16	0.0450236	0.00834247	0.260417	0.311452	NR3C1, F2RL2, OXTR, PTGER1, SSTR1, ADRB2, CGA, HRH1, LPAR1, AGTR1, S1PR1, HTR7, F2R	GABRB3, LPAR3, LPAR2, P2RY1, NPW, LPAR4, MCHR1, GRIA1, GRIK4, EDN3, ADRA1D, EDNRB, ADM, ADRA2A, NMU, CALCRL
iMyoblast vs S1	KEGG	Down	hsa04060	Cytokine-cytokine receptor interaction	116	20	18	0.000962883	0.0117752	0.0248868	0.364349	TGFB1, BMPR2, IL7R, TNFRSF12A, TGFBR2, CLCF1, CXCL12, IL11, IL13RA1, CXCL8, CCL26, INHBA, IL4R, TNFSF12, IL18, IL17RC, ACVR1, IL15, OSMR, IFNE	BMP4, GDF11, CERS1, ACVR2B, TNFRSF1B, CXCL14, BMP7, BMP5, GDF6, TGFB2, IL24, CD4, EDA, TNFRSF19, IL2RB, TNFRSF9, CCR10, IL6R
iMyoblast vs S1	KEGG	Down	hsa00910	Nitrogen metabolism	11	1	4	0.609604	0.0119281	1	0.364349	CA12	CA14, GLUL, CA3, CA8
iMyoblast vs S1	KEGG	Down	hsa04270	Vascular smooth muscle contraction	83	6	13	0.600797	0.0151595	1	0.424466	GNA11, ITPR3, PRKACB, ARHGEF12, AGTR1, KCNMA1	GUCY1A2, MRVI1, MYH10, RAMP2, CACNA1C, KCNMB4, ACTA2, NPPB, EDN3, ADRA1D, ADM, PLA2G3, CALCRL
iMyoblast vs S1	KEGG	Down	hsa05410	Hypertrophic cardiomyopathy	69	12	11	0.00411519	0.0191456	0.0624864	0.456968	ITGB1, TGFB1, ITGA2, ITGA3, LMNA, ITGA5, SGCB, ITGB5, SLC8A1, ITGB3, ITGA6, TPM1	LAMA1, IGF1, PRKAA2, LAMA2, ITGA1, ITGA9, TGFB2, CACNA1C, TNNC1, DES, ACTC1
iMyoblast vs S1	KEGG	Down	hsa05224	Breast cancer	112	10	16	0.346176	0.0194337	0.770299	0.456968	AKT3, FGF5, FZD8, FGF2, RB1, CCND1, EGFR, SHC4, FZD1, WNT5B	AXIN2, LEF1, WNT2B, IGF1, FZD3, FGF9, PIK3R3, SHC2, PIK3R1, WNT16, FZD10, FOS, NOTCH3, JAG1, FGF18, GADD45G
iMyoblast vs S1	KEGG	Down	hsa05412	Arrhythmogenic right ventricular cardiomyopathy	60	11	10	0.0044194	0.0207206	0.0624864	0.456968	ITGB1, ITGA2, ITGA3, LMNA, ITGA5, SGCB, ITGB5, SLC8A1, CDH2, ITGB3, ITGA6	LAMA1, LEF1, LAMA2, ITGA1, ITGA9, DSC2, CACNA1C, DES, ACTN2, PKP2
iMyoblast vs S1	KEGG	Down	hsa04310	Wnt signaling pathway	123	10	17	0.460084	0.0217604	0.904025	0.456968	FZD8, VANGL1, PRKACB, DKK1, CCND1, FOSL1, FZD1, PPARD, WNT5B, SMAD3	AXIN2, NKD1, LEF1, WNT2B, NOTUM, DAAM1, FZD3, RAC3, ZNRF3, WNT16, FZD10, DKK2, CCND2, SFRP2, MAPK10, PRICKLE1, GPC4
iMyoblast vs S1	KEGG	Down	hsa00640	Propanoate metabolism	29	1	6	0.895944	0.0256638	1	0.500665	LDHA	ACACA, ACAT2, PCCA, ACSS3, ALDH6A1, ACSS2
iMyoblast vs S1	KEGG	Down	hsa04390	Hippo signaling pathway	130	14	17	0.102395	0.0298613	0.458731	0.500665	TGFB1, BIRC2, BMPR2, SMAD7, TGFBR2, NF2, SERPINE1, FZD8, CCND1, WWTR1, FZD1, WNT5B, ID2, SMAD3	AXIN2, NKD1, LEF1, WNT2B, BMP4, FZD3, BMP7, PARD6B, AMOT, BMP5, WNT16, GDF6, FZD10, BBC3, CCND2, CRB2, TGFB2
iMyoblast vs S1	KEGG	Down	hsa04512	ECM-receptor interaction	64	13	10	0.000756351	0.0312892	0.0220642	0.500665	ITGB1, CD47, LAMB3, ITGA2, ITGA3, CD44, ITGA5, FN1, ITGB5, LAMC2, THBS1, ITGB3, ITGA6	LAMA1, COL9A3, TNC, LAMA2, COL2A1, ITGA1, ITGA9, COL9A2, FREM2, FRAS1
iMyoblast vs S1	KEGG	Down	hsa04930	Type II diabetes mellitus	29	2	6	0.675871	0.0313132	1	0.500665	CACNA1A, SOCS3	SOCS1, SOCS2, PIK3R3, PIK3R1, CACNA1C, MAPK10

## Sheet: iMyoblast vs S2A
Supplementary file 2. Top 20 Up and Down GO terms (BP, CC, MF) and KEGG pathways for pairwise cell type comparisons. Terms comprising N (< 500) genes are sorted by P.Up and P.Down. For each term, the top Genes.Up and Genes.Down are listed.
Comparison	Ont	Dir	GO/KEGG ID	GO Term / KEGG Pathway (top 20 Up and Down)	N	Up	Down	P.Up	P.Down	FDR.Up	FDR.Down	Genes.Up (limited to a maximum of the top 30 Up genes)	Genes.Down (limited to a maximum of the top 30 Down genes)
iMyoblast vs S2A	BP	Up	GO:0006979	response to oxidative stress	354	32	19	2.53756e-07	0.44545	0.00412581	1	TXNRD1, SLC7A11, NQO1, LDHA, G6PD, STX2, HIF1A, KLF2, GCLM, NUDT15, PAWR, PPP2CB, MET, CYCS, FUT8, FOSL1, MSRB3, SIRPA, SLC8A1, PXN, ECT2, NCOA7, MAPK8, PYROXD1, TPM1, CDK2, NOX4, VRK2, BNIP3, PDE8A	APOE, MGMT, SELENOP, SESN3, PDLIM1, PSAP, DAPK1, CYP1B1, DHCR24, GPX7, MMP9, MAP1LC3A, TXNIP, GPR37, TP53INP1, MGAT3, PLA2R1, CYGB, DPEP1
iMyoblast vs S2A	BP	Up	GO:0034599	cellular response to oxidative stress	243	25	12	4.06183e-07	0.57365	0.00412581	1	TXNRD1, SLC7A11, NQO1, G6PD, HIF1A, KLF2, PAWR, MET, CYCS, FUT8, MSRB3, SIRPA, PXN, ECT2, NCOA7, MAPK8, PYROXD1, TPM1, CDK2, NOX4, VRK2, BNIP3, PDE8A, AGAP3, SPHK1	MGMT, PSAP, DAPK1, CYP1B1, GPX7, MMP9, MAP1LC3A, GPR37, TP53INP1, MGAT3, PLA2R1, DPEP1
iMyoblast vs S2A	BP	Up	GO:0032963	collagen metabolic process	77	13	10	1.07617e-06	0.00500608	0.00728749	0.311959	ITGB1, MMP1, ID1, LARP6, HIF1A, PLOD2, ENG, COL13A1, ITGA2, SERPINB7, TGFB1, PPARD, TRAM2	PHYKPL, CST3, BMP4, MMP15, MMP9, COL1A2, CYGB, MFAP4, MMP11, MMP23B
iMyoblast vs S2A	BP	Up	GO:0007507	heart development	465	35	44	1.91987e-06	1.97212e-05	0.00780041	0.00572337	ITGB1, G6PD, ID1, HIF1A, ID2, ADAMTS6, RGS4, CACYBP, PAK1, COX17, LMNA, ENG, DKK1, ID3, GREM1, MBD2, SLC8A1, POPDC3, TGFB1, CYR61, FGF2, LMO4, PPARD, ADAMTS1, ZMIZ1, MICAL2, TPM1, FGFRL1, NSD2, PPP1R13L	SPRY1, CXADR, GPC3, TNFRSF1B, RAMP2, PDLIM1, CPE, SMAD1, TNNC1, ADAMTS9, ACTN2, MYH10, ZFP36L1, IGF1, TNNI1, BMP4, CHD7, SFRP2, RYR1, ADM, TNNT2, COL2A1, ECE1, SOX4, PCSK5, PDCD4, SORBS2, ACVR2B, DUSP6, BMP5
iMyoblast vs S2A	BP	Up	GO:2000147	positive regulation of cell motility	398	31	25	4.83877e-06	0.131328	0.0117133	1	ITGB1, VEGFC, HRAS, KITLG, HIF1A, CAVIN1, DIAPH1, MET, PAK1, PGF, ITGA2, SEMA7A, SLC8A1, TGFB1, CYR61, FGF2, SERPINE1, AKT3, ADAMTS1, SUN2, HBEGF, CCBE1, CD274, NOX4, HMGB1, FGF1, FBXO5, RIPOR1, MAP2K3, SPHK1	SEMA6B, MDK, ICAM1, IGF1, PIK3R1, BMP4, CDH5, CD74, SEMA6A, VTN, PIK3R3, MMP9, ADAM17, ROR2, KDR, LEF1, ZNF268, FGF9, DAPK2, SPARC, SEMA5A, RIPOR2, F10, WISP1, IL1R1
iMyoblast vs S2A	BP	Up	GO:0001667	ameboidal-type cell migration	322	27	24	5.11801e-06	0.0296109	0.0117133	0.751933	ITGB1, VEGFC, ID1, KITLG, HIF1A, CORO1C, MET, PAK1, S100A2, ITGA2, GREM1, SEMA7A, SLC8A1, TGFB1, FGF2, APPL2, PXN, PPARD, AKT3, ANLN, C5orf30, HBEGF, CCBE1, HMGB1, FGF1, MAP2K3, DOCK5	APOE, GPC3, NANOS1, SEMA6B, ADAMTS9, EDNRB, CYP1B1, BMP4, PTP4A3, SEMA6A, PIK3R3, MMP9, ADAM17, TACSTD2, CYGB, EVL, VASH1, KDR, SERPINF1, AMOT, ITGB2, HTR2B, SPARC, SEMA5A
iMyoblast vs S2A	BP	Up	GO:0030279	negative regulation of ossification	54	10	1	6.77024e-06	0.934964	0.0117133	1	ID1, HIF1A, ID2, RFLNB, DKK1, ID3, GREM1, TGFB1, SRGN, SMAD6	MDK
iMyoblast vs S2A	BP	Up	GO:0140014	mitotic nuclear division	241	23	7	7.0036e-06	0.970487	0.0117133	1	UBE2S, MZT1, BUB3, SPDL1, TGFB1, NCAPD3, TPX2, AURKA, PTTG1, RACGAP1, ANLN, CENPF, PLK1, NUF2, KIF23, KNSTRN, MKI67, NCAPD2, CDC20, BUB1, FBXO5, SGO1, SPHK1	IGF1, BMP4, SLF2, IGF2.1, TTN, KLHDC8B, CDKN1C
iMyoblast vs S2A	BP	Up	GO:0000302	response to reactive oxygen species	178	19	9	7.18278e-06	0.563119	0.0117133	1	NQO1, LDHA, KLF2, NUDT15, PAWR, PPP2CB, MET, FOSL1, SIRPA, SLC8A1, PXN, ECT2, MAPK8, TPM1, CDK2, BNIP3, PDE8A, AGAP3, SPHK1	APOE, SESN3, PSAP, CYP1B1, MMP9, MAP1LC3A, TXNIP, GPR37, DPEP1
iMyoblast vs S2A	BP	Up	GO:0062197	cellular response to chemical stress	285	25	14	7.49064e-06	0.581489	0.0117133	1	TXNRD1, SLC7A11, NQO1, G6PD, HIF1A, KLF2, PAWR, MET, CYCS, FUT8, MSRB3, SIRPA, PXN, ECT2, NCOA7, MAPK8, PYROXD1, TPM1, CDK2, NOX4, VRK2, BNIP3, PDE8A, AGAP3, SPHK1	MGMT, PSAP, ZFP36L1, DAPK1, CYP1B1, GPX7, MMP9, MAP1LC3A, GPR37, TP53INP1, MAPK10, MGAT3, PLA2R1, DPEP1
iMyoblast vs S2A	BP	Up	GO:0040017	positive regulation of locomotion	407	31	26	7.49561e-06	0.108801	0.0117133	1	ITGB1, VEGFC, HRAS, KITLG, HIF1A, CAVIN1, DIAPH1, MET, PAK1, PGF, ITGA2, SEMA7A, SLC8A1, TGFB1, CYR61, FGF2, SERPINE1, AKT3, ADAMTS1, SUN2, HBEGF, CCBE1, CD274, NOX4, HMGB1, FGF1, FBXO5, RIPOR1, MAP2K3, SPHK1	TUBB2B, SEMA6B, MDK, ICAM1, IGF1, PIK3R1, BMP4, CDH5, CD74, SEMA6A, VTN, PIK3R3, MMP9, ADAM17, ROR2, KDR, LEF1, ZNF268, FGF9, DAPK2, SPARC, SEMA5A, RIPOR2, F10, WISP1, IL1R1
iMyoblast vs S2A	BP	Up	GO:0030335	positive regulation of cell migration	390	30	25	8.91163e-06	0.112027	0.012208	1	ITGB1, VEGFC, HRAS, KITLG, HIF1A, DIAPH1, MET, PAK1, PGF, ITGA2, SEMA7A, SLC8A1, TGFB1, CYR61, FGF2, SERPINE1, AKT3, ADAMTS1, SUN2, HBEGF, CCBE1, CD274, NOX4, HMGB1, FGF1, FBXO5, RIPOR1, MAP2K3, SPHK1, DOCK5	SEMA6B, MDK, ICAM1, IGF1, PIK3R1, BMP4, CDH5, CD74, SEMA6A, VTN, PIK3R3, MMP9, ADAM17, ROR2, KDR, LEF1, ZNF268, FGF9, DAPK2, SPARC, SEMA5A, RIPOR2, F10, WISP1, IL1R1
iMyoblast vs S2A	BP	Up	GO:0051272	positive regulation of cellular component movement	411	31	26	9.01401e-06	0.11742	0.012208	1	ITGB1, VEGFC, HRAS, KITLG, HIF1A, CAVIN1, DIAPH1, MET, PAK1, PGF, ITGA2, SEMA7A, SLC8A1, TGFB1, CYR61, FGF2, SERPINE1, AKT3, ADAMTS1, SUN2, HBEGF, CCBE1, CD274, NOX4, HMGB1, FGF1, FBXO5, RIPOR1, MAP2K3, SPHK1	TUBB2B, SEMA6B, MDK, ICAM1, IGF1, PIK3R1, BMP4, CDH5, CD74, SEMA6A, VTN, PIK3R3, MMP9, ADAM17, ROR2, KDR, LEF1, ZNF268, FGF9, DAPK2, SPARC, SEMA5A, RIPOR2, F10, WISP1, IL1R1
iMyoblast vs S2A	BP	Up	GO:0007569	cell aging	94	13	6	1.50467e-05	0.361911	0.0191046	1	MIF, HRAS, ID2, PAWR, LMNA, ENG, SERPINE1, AKT3, H2AFX, ZMIZ1, HMGA1, NOX4, FBXO5	MME, ICAM1, PDCD4, YPEL3, PLA2R1, VASH1
iMyoblast vs S2A	BP	Up	GO:0000912	assembly of actomyosin apparatus involved in cytokinesis	6	4	0	2.11658e-05	1	0.0238879	1	ECT2, RACGAP1, ANLN, KIF23
iMyoblast vs S2A	BP	Up	GO:0000915	actomyosin contractile ring assembly	6	4	0	2.11658e-05	1	0.0238879	1	ECT2, RACGAP1, ANLN, KIF23
iMyoblast vs S2A	BP	Up	GO:0010631	epithelial cell migration	236	21	18	2.68807e-05	0.0479694	0.0256395	0.83383	ITGB1, VEGFC, ID1, HIF1A, CORO1C, MET, S100A2, ITGA2, GREM1, TGFB1, FGF2, PXN, PPARD, AKT3, ANLN, HBEGF, CCBE1, HMGB1, FGF1, MAP2K3, DOCK5	APOE, NANOS1, ADAMTS9, CYP1B1, BMP4, PTP4A3, PIK3R3, MMP9, ADAM17, TACSTD2, EVL, VASH1, KDR, SERPINF1, AMOT, ITGB2, SPARC, SEMA5A
iMyoblast vs S2A	BP	Up	GO:0090132	epithelium migration	236	21	18	2.68807e-05	0.0479694	0.0256395	0.83383	ITGB1, VEGFC, ID1, HIF1A, CORO1C, MET, S100A2, ITGA2, GREM1, TGFB1, FGF2, PXN, PPARD, AKT3, ANLN, HBEGF, CCBE1, HMGB1, FGF1, MAP2K3, DOCK5	APOE, NANOS1, ADAMTS9, CYP1B1, BMP4, PTP4A3, PIK3R3, MMP9, ADAM17, TACSTD2, EVL, VASH1, KDR, SERPINF1, AMOT, ITGB2, SPARC, SEMA5A
iMyoblast vs S2A	BP	Up	GO:0046677	response to antibiotic	229	21	14	2.72802e-05	0.290499	0.0256395	1	NQO1, LDHA, G6PD, ID1, BIRC2, HSP90AA1, KLF2, PAWR, RGS4, PPP2CB, MET, FOSL1, ID3, SIRPA, EIF4EBP1, SLC8A1, CCND1, ECT2, BNIP3, PDE8A, SPHK1	MGMT, HMGCR, PSAP, ICAM1, CYP1B1, DNMT3A, MAP1LC3A, TXNIP, GPR37, TP53INP1, CDO1, GSN, VCAM1, SPARC
iMyoblast vs S2A	BP	Up	GO:0048738	cardiac muscle tissue development	170	17	19	2.77661e-05	0.000631476	0.0256395	0.0827641	ITGB1, G6PD, ID2, RGS4, CACYBP, PAK1, LMNA, ENG, DKK1, GREM1, SLC8A1, TGFB1, FGF2, TPM1, PPP1R13L, NOX4, SMAD7	CXADR, SMAD1, TNNC1, ADAMTS9, ACTN2, MYH10, IGF1, TNNI1, BMP4, CHD7, TNNT2, SORBS2, BMP5, MYH7, FGF9, TTN, PKP2, WNT2, JARID2
iMyoblast vs S2A	BP	Down	GO:0006694	steroid biosynthetic process	135	3	31	0.808563	2.67765e-13	1	2.67222e-09	G6PD, OSBPL6, FGF1	SQLE, MSMO1, TM7SF2, HMGCS1, APOE, IDI1, ERG28, FDFT1, LSS, SCD, FDPS, HMGCR, MVD, INSIG1, DHCR7, ACAT2, ASAH1, NSDHL, DHCR24, SREBF2, ADM, MVK, HSD17B7, BMP5, STARD4, PBX1, FAXDC2, SLC27A2, HSD17B14, FGFR4
iMyoblast vs S2A	BP	Down	GO:0016126	sterol biosynthetic process	65	2	22	0.6422	3.94618e-13	1	2.67222e-09	G6PD, FGF1	SQLE, MSMO1, TM7SF2, HMGCS1, APOE, IDI1, ERG28, FDFT1, LSS, SCD, FDPS, HMGCR, MVD, INSIG1, DHCR7, ACAT2, NSDHL, DHCR24, SREBF2, MVK, HSD17B7, FAXDC2
iMyoblast vs S2A	BP	Down	GO:1902653	secondary alcohol biosynthetic process	60	2	21	0.603799	7.64453e-13	1	3.88247e-09	G6PD, FGF1	SQLE, MSMO1, TM7SF2, HMGCS1, APOE, IDI1, ERG28, FDFT1, LSS, SCD, FDPS, HMGCR, MVD, INSIG1, DHCR7, ACAT2, NSDHL, DHCR24, SREBF2, MVK, HSD17B7
iMyoblast vs S2A	BP	Down	GO:0006695	cholesterol biosynthetic process	59	2	20	0.593787	5.17705e-12	1	1.77878e-08	G6PD, FGF1	SQLE, MSMO1, TM7SF2, HMGCS1, APOE, IDI1, FDFT1, LSS, SCD, FDPS, HMGCR, MVD, INSIG1, DHCR7, ACAT2, NSDHL, DHCR24, SREBF2, MVK, HSD17B7
iMyoblast vs S2A	BP	Down	GO:0016125	sterol metabolic process	121	3	27	0.743013	1.70861e-11	1	4.80887e-08	G6PD, PPARD, FGF1	SQLE, MSMO1, TM7SF2, HMGCS1, APOE, APOC1, IDI1, ERG28, FDFT1, LSS, LDLR, SCD, FDPS, HMGCR, MVD, LIPA, INSIG1, DHCR7, ACAT2, CYP1B1, NSDHL, DHCR24, SREBF2, MVK, NPC2, HSD17B7, FAXDC2
iMyoblast vs S2A	BP	Down	GO:0008202	steroid metabolic process	210	5	36	0.79155	1.89372e-11	1	4.80887e-08	G6PD, ATP8B1, PPARD, OSBPL6, FGF1	SQLE, MSMO1, TM7SF2, HMGCS1, APOE, APOC1, IDI1, ERG28, FDFT1, LSS, LDLR, SCD, FDPS, HMGCR, MVD, LIPA, INSIG1, DHCR7, ACAT2, ASAH1, CYP1B1, NSDHL, DHCR24, SREBF2, ADM, MVK, NPC2, HSD17B7, BMP5, STARD4
iMyoblast vs S2A	BP	Down	GO:0046890	regulation of lipid biosynthetic process	142	4	29	0.663116	2.99388e-11	1	6.75785e-08	CYR61, NR1H2, FGF1, SPHK1	SQLE, TM7SF2, HMGCS1, APOE, APOC1, IDI1, FABP3, FDFT1, LSS, LDLR, SCD, FDPS, HMGCR, MVD, CCDC3, INSIG1, DHCR7, ASAH1, SREBF2, ADM, CD74, MVK, ADGRF5, BMP5, STARD4, NR1H3, FGFR4, HTR2B, SORBS1
iMyoblast vs S2A	BP	Down	GO:1901617	organic hydroxy compound biosynthetic process	185	10	33	0.0666141	4.64604e-11	0.917856	8.94928e-08	SLC7A11, G6PD, MYO5A, PLCG2, IMPA1, PTS, FGF2, OSBPL6, FGF1, SPHK1	SQLE, MSMO1, TM7SF2, HMGCS1, APOE, IDI1, PNMT, ERG28, FDFT1, LSS, SCD, FDPS, HMGCR, PLTP, MVD, INSIG1, DHCR7, ACAT2, ASAH1, NSDHL, DHCR24, SREBF2, IP6K3, MVK, CDH3, GPR37, HSD17B7, BMP5, STARD4, ISYNA1
iMyoblast vs S2A	BP	Down	GO:0030049	muscle filament sliding	33	2	15	0.338706	5.28631e-11	1	8.94928e-08	TPM3, TPM1	TNNI2, MYL1, MYH3, TNNC1, ACTN2, DES, TNNI1, TNNC2, TNNT2, TNNT3, MYL4, ACTA1, MYH7, MYH8, TTN
iMyoblast vs S2A	BP	Down	GO:0033275	actin-myosin filament sliding	33	2	15	0.338706	5.28631e-11	1	8.94928e-08	TPM3, TPM1	TNNI2, MYL1, MYH3, TNNC1, ACTN2, DES, TNNI1, TNNC2, TNNT2, TNNT3, MYL4, ACTA1, MYH7, MYH8, TTN
iMyoblast vs S2A	BP	Down	GO:0050810	regulation of steroid biosynthetic process	70	1	20	0.901407	9.58654e-11	1	1.49808e-07	FGF1	SQLE, TM7SF2, HMGCS1, APOE, IDI1, FDFT1, LSS, SCD, FDPS, HMGCR, MVD, INSIG1, DHCR7, ASAH1, SREBF2, ADM, MVK, BMP5, STARD4, FGFR4
iMyoblast vs S2A	BP	Down	GO:0019218	regulation of steroid metabolic process	88	1	22	0.943327	1.66094e-10	1	2.41014e-07	FGF1	SQLE, TM7SF2, HMGCS1, APOE, APOC1, IDI1, FDFT1, LSS, LDLR, SCD, FDPS, HMGCR, MVD, INSIG1, DHCR7, ASAH1, SREBF2, ADM, MVK, BMP5, STARD4, FGFR4
iMyoblast vs S2A	BP	Down	GO:0030198	extracellular matrix organization	269	18	40	0.00262145	2.48351e-10	0.249877	3.3635e-07	ITGB1, MMP1, PLOD2, QSOX1, ENG, COL13A1, ITGA2, GREM1, TGFB1, TGFBI, CYR61, FGF2, NTN4, P4HA1, SERPINE1, CD44, LAMB3, CCDC80	TNFRSF1B, RAMP2, A2M, BGN, ADAMTS9, OLFML2A, SULF2, CST3, GPM6B, ICAM1, NPNT, CYP1B1, LOXL4, ITGA1, SPINT2, COL9A3, ITGA11, SFRP2, LAMA1, COL2A1, MMP15, ITGB8, VTN, MMP9, COL1A2, COL6A2, MFAP4, COL6A1, FLRT2, COL9A2
iMyoblast vs S2A	BP	Down	GO:0043062	extracellular structure organization	270	18	40	0.00270324	2.71004e-10	0.25191	3.4409e-07	ITGB1, MMP1, PLOD2, QSOX1, ENG, COL13A1, ITGA2, GREM1, TGFB1, TGFBI, CYR61, FGF2, NTN4, P4HA1, SERPINE1, CD44, LAMB3, CCDC80	TNFRSF1B, RAMP2, A2M, BGN, ADAMTS9, OLFML2A, SULF2, CST3, GPM6B, ICAM1, NPNT, CYP1B1, LOXL4, ITGA1, SPINT2, COL9A3, ITGA11, SFRP2, LAMA1, COL2A1, MMP15, ITGB8, VTN, MMP9, COL1A2, COL6A2, MFAP4, COL6A1, FLRT2, COL9A2
iMyoblast vs S2A	BP	Down	GO:0008015	blood circulation	328	14	43	0.141192	1.03589e-09	1	1.23789e-06	ASPH, VEGFC, ID2, GCLM, RGS4, SLC8A1, TGFB1, PPARD, TPM1, HBEGF, PPP1R13L, MAP2K3, SMAD7, DOCK5	APOE, CXADR, TNNI2, SERPING1, RAMP2, MYL1, HMGCR, MME, KCNH2, KCNMB4, TNNC1, EDNRB, DES, ICAM1, ITGA1, TBC1D8, CDH5, CHD7, PTP4A3, RYR1, ADM, TNNT2, ECE1, FXYD6, PCSK5, TNNT3, DSC2, COL1A2, MYL4, MTHFR
iMyoblast vs S2A	BP	Down	GO:0046165	alcohol biosynthetic process	128	7	25	0.114068	2.41433e-09	1	2.61267e-06	G6PD, PLCG2, IMPA1, PTS, FGF2, FGF1, SPHK1	SQLE, MSMO1, TM7SF2, HMGCS1, APOE, IDI1, ERG28, FDFT1, LSS, SCD, FDPS, HMGCR, MVD, INSIG1, DHCR7, ACAT2, ASAH1, NSDHL, DHCR24, SREBF2, IP6K3, MVK, HSD17B7, BMP5, ISYNA1
iMyoblast vs S2A	BP	Down	GO:0003013	circulatory system process	337	16	43	0.0612714	2.552e-09	0.917856	2.61267e-06	ASPH, VEGFC, ID2, GCLM, RGS4, SLC8A1, TGFB1, PPARD, TPM1, HBEGF, MFSD2A, PPP1R13L, NOX4, MAP2K3, SMAD7, DOCK5	APOE, CXADR, TNNI2, SERPING1, RAMP2, MYL1, HMGCR, MME, KCNH2, KCNMB4, TNNC1, EDNRB, DES, ICAM1, ITGA1, TBC1D8, CDH5, CHD7, PTP4A3, RYR1, ADM, TNNT2, ECE1, FXYD6, PCSK5, TNNT3, DSC2, COL1A2, MYL4, MTHFR
iMyoblast vs S2A	BP	Down	GO:0008203	cholesterol metabolic process	110	3	23	0.684029	2.57216e-09	1	2.61267e-06	G6PD, PPARD, FGF1	SQLE, MSMO1, TM7SF2, HMGCS1, APOE, APOC1, IDI1, FDFT1, LSS, LDLR, SCD, FDPS, HMGCR, MVD, INSIG1, DHCR7, ACAT2, NSDHL, DHCR24, SREBF2, MVK, NPC2, HSD17B7
iMyoblast vs S2A	BP	Down	GO:1902652	secondary alcohol metabolic process	119	3	24	0.739048	2.90508e-09	1	2.81032e-06	G6PD, PPARD, FGF1	SQLE, MSMO1, TM7SF2, HMGCS1, APOE, APOC1, IDI1, ERG28, FDFT1, LSS, LDLR, SCD, FDPS, HMGCR, MVD, INSIG1, DHCR7, ACAT2, NSDHL, DHCR24, SREBF2, MVK, NPC2, HSD17B7
iMyoblast vs S2A	BP	Down	GO:0045540	regulation of cholesterol biosynthetic process	40	1	14	0.745248	5.56734e-09	1	4.71252e-06	FGF1	SQLE, TM7SF2, HMGCS1, APOE, IDI1, FDFT1, LSS, SCD, FDPS, HMGCR, MVD, DHCR7, SREBF2, MVK
iMyoblast vs S2A	CC	Up	GO:0000793	condensed chromosome	188	21	4	1.61209e-06	0.990225	0.00780041	1	RANGAP1, BUB3, SKA3, SPDL1, NCAPD3, CENPB, AURKA, H2AFX, CENPH, CENPF, PLK1, NUF2, KNSTRN, SUN2, MKI67, NCAPG2, CDK2, NCAPD2, HMGB1, BUB1, SGO1	REC8, CCNB1IP1, KMT5C, TTN
iMyoblast vs S2A	CC	Up	GO:0000779	condensed chromosome, centromeric region	112	15	2	6.52506e-06	0.984084	0.0117133	1	RANGAP1, BUB3, SKA3, SPDL1, NCAPD3, CENPB, AURKA, CENPH, CENPF, PLK1, NUF2, KNSTRN, NCAPD2, BUB1, SGO1	REC8, KMT5C
iMyoblast vs S2A	CC	Up	GO:0097149	centralspindlin complex	3	3	0	4.38799e-05	1	0.029714	1	ECT2, RACGAP1, KIF23
iMyoblast vs S2A	CC	Up	GO:0000940	condensed chromosome outer kinetochore	13	5	0	5.79808e-05	1	0.0356934	1	SKA3, SPDL1, CENPF, PLK1, BUB1
iMyoblast vs S2A	CC	Up	GO:0000780	condensed nuclear chromosome, centromeric region	23	6	2	9.00998e-05	0.339293	0.0457594	1	CENPB, AURKA, PLK1, NUF2, BUB1, SGO1	REC8, KMT5C
iMyoblast vs S2A	CC	Up	GO:0071437	invadopodium	15	5	0	0.000107381	1	0.049023	1	ITGB1, MSN, PAK1, EZR, PLAUR
iMyoblast vs S2A	CC	Up	GO:0099513	polymeric cytoskeletal fiber	480	32	24	0.000108387	0.549068	0.049023	1	TUBA1C, KATNAL1, TCHP, SMTN, TPM3, CKAP2, TUBB6, NAV1, MYO5A, PAWR, NEK7, TUBB4B, PAK1, KRT7, LMNA, SKA3, CEP170, EZR, SLC8A1, TPX2, KRT80, AURKA, RACGAP1, PLK1, KIF23, TPM1, KNSTRN, LMNB2, PLS3, HAUS6	LMOD1, MTUS1, TUBB2B, DCDC2, PDLIM1, GAS7, ACTN2, DES, FIGN, MAP1LC3A, ROR2, PPL, ACTA1, AIF1L, SYBU, SAA1, AMOT, PKP2, KATNAL2, GABARAPL1, WIPF3, KIF26A, TOGARAM1, BEX4
iMyoblast vs S2A	CC	Up	GO:0000794	condensed nuclear chromosome	72	10	4	0.000113936	0.497974	0.0503175	1	NCAPD3, CENPB, AURKA, H2AFX, PLK1, NUF2, SUN2, NCAPD2, BUB1, SGO1	REC8, CCNB1IP1, KMT5C, TTN
iMyoblast vs S2A	CC	Up	GO:0009986	cell surface	444	29	51	0.000155219	4.3987e-09	0.0562605	4.0618e-06	ITGB1, MSN, MIF, SLC7A11, CDH2, HSP90AA1, SLC3A2, PVR, MET, ULBP2, TNFRSF12A, CD59, ENG, PLAUR, ITGA2, IL7R, SIRPA, RALA, SEMA7A, TGFB1, ALCAM, LMO7, CD44, TNFRSF10D, HBEGF, CD274, HMGB1, CSPG4, ANTXR2	CLSTN2, GPC3, FCGRT, RAMP2, LDLR, VAMP5, MME, KCNH2, EGFL7, BGN, ADAMTS9, SULF2, ICAM1, ANK3, RTN4R, GPC6, ITGA1, BST2, LPAR2, CDH5, IQGAP2, CD74, ECE1, UNC5D, CDH3, UNC5C, ITGB8, SSC4D, ADGRF5, SMIM1
iMyoblast vs S2A	CC	Up	GO:0000775	chromosome, centromeric region	182	17	3	0.000168343	0.996892	0.0562605	1	RANGAP1, PPP2CB, BUB3, SKA3, SPDL1, NCAPD3, CENPB, AURKA, CENPH, CENPF, PLK1, NUF2, KNSTRN, NCAPD2, DNMT1, BUB1, SGO1	REC8, DNMT3A, KMT5C
iMyoblast vs S2A	CC	Up	GO:0005819	spindle	316	24	6	0.000171703	0.999239	0.0562605	1	KATNAL1, MZT1, CKAP2, RANGAP1, NEK7, DIAPH1, PPP2CB, SKA3, CEP170, SPDL1, TPX2, ECT2, AURKA, RACGAP1, CENPF, PLK1, KIF23, KNSTRN, CDC20, HAUS6, CEP128, FBXO5, SGO1, CKAP2L	MTUS1, DCDC2, MYH10, CRMP1, KATNAL2, BEX4
iMyoblast vs S2A	CC	Up	GO:0032587	ruffle membrane	79	10	5	0.000189878	0.343979	0.058445	1	ITGB1, CORO1C, DIAPH1, PAK1, EZR, APPL2, NF2, TPM1, MTMR6, DLC1	RASGRP2, ADAM17, PDE9A, AIF1L, EPS8L2
iMyoblast vs S2A	CC	Up	GO:0098687	chromosomal region	316	23	3	0.000429908	0.999993	0.0919324	1	RANGAP1, PPP2CB, BUB3, SKA3, SPDL1, NCAPD3, CENPB, AURKA, HIST1H4C, H2AFX, PURA, CENPH, CENPF, PLK1, NUF2, KNSTRN, SUN2, CDK2, NCAPD2, DNMT1, BUB1, HIST2H4B, SGO1	REC8, DNMT3A, KMT5C
iMyoblast vs S2A	CC	Up	GO:0000922	spindle pole	149	14	2	0.00047844	0.99674	0.09936	1	KATNAL1, CKAP2, NEK7, PPP2CB, SPDL1, TPX2, AURKA, CENPF, PLK1, KNSTRN, CDC20, CEP128, SGO1, CKAP2L	KATNAL2, BEX4
iMyoblast vs S2A	CC	Up	GO:0031256	leading edge membrane	124	12	11	0.000516884	0.0376076	0.102946	0.805712	ITGB1, CORO1C, DIAPH1, PAK1, EZR, APPL2, CD44, NF2, TPM1, MTMR6, CSPG4, DLC1	RASGRP2, ADAM17, PDE9A, AIF1L, ANK1, ITGA8, SHISA9, GRIA1, EPS8L2, GABARAPL1, RIPOR2
iMyoblast vs S2A	CC	Up	GO:0032153	cell division site	57	8	2	0.000590133	0.801624	0.109987	1	ITGB1, SPIRE1, RALA, ECT2, RACGAP1, ANLN, NF2, CEP55	MYH10, KLHDC8B
iMyoblast vs S2A	CC	Up	GO:0000777	condensed chromosome kinetochore	101	11	1	0.00067996	0.995969	0.120116	1	RANGAP1, BUB3, SKA3, SPDL1, CENPH, CENPF, PLK1, NUF2, KNSTRN, BUB1, SGO1	REC8
iMyoblast vs S2A	CC	Up	GO:0044815	DNA packaging complex	80	9	2	0.000706152	0.895155	0.123668	1	H2AFZ, NCAPD3, HIST1H4C, H2AFX, NCAPG2, NCAPD2, HIST1H2AG, HIST2H4B, HIST2H2AC	HIST1H2AC, HIST3H2A
iMyoblast vs S2A	CC	Up	GO:0032154	cleavage furrow	45	7	2	0.000749198	0.69161	0.127899	1	ITGB1, SPIRE1, RALA, ECT2, RACGAP1, NF2, CEP55	MYH10, KLHDC8B
iMyoblast vs S2A	CC	Up	GO:0005925	focal adhesion	385	26	18	0.00124979	0.7854	0.166132	1	ITGB1, MSN, CDH2, PVR, ARHGAP22, CORO1C, SH3KBP1, PAK1, CD59, EZR, ENG, PLAUR, ITGA2, RALA, ZYX, NEXN, ALCAM, LMO7, PXN, CD44, KIF23, HMGA1, NOX4, SCARF2, CSPG4, DLC1	RPS10, PDLIM1, MME, ACTN2, ICAM1, ITGA1, ITGA11, ITGB8, SORBS2, ADAM17, RHOU, GSN, EVL, FLRT2, AIF1L, ITGA8, ITGB2, SORBS1
iMyoblast vs S2A	CC	Down	GO:0031012	extracellular matrix	310	18	56	0.0114968	1.15553e-17	0.506631	2.34747e-13	MMP1, PKM, CDH2, COL13A1, GREM1, SEMA7A, TGFB1, TGFBI, CYR61, NTN4, SERPINE1, ADAMTS1, LAMB3, SERPINB8, CCBE1, CSPG4, FGF1, CCDC80	APOE, TRIL, GPC3, WNT2B, SERPING1, A2M, EGFL7, COLEC12, PCOLCE, BGN, ADAMTS9, OLFML2A, TIMP3, PSAP, MDK, ICAM1, SPON2, GPC6, NPNT, LRIG1, COL9A3, SFRP2, CDON, LAMA1, COL2A1, MMP15, LRRN1, LAD1, VTN, CTHRC1
iMyoblast vs S2A	CC	Down	GO:0062023	collagen-containing extracellular matrix	254	15	42	0.0199638	5.25359e-12	0.659456	1.77878e-08	PKM, CDH2, COL13A1, GREM1, SEMA7A, TGFB1, TGFBI, CYR61, NTN4, SERPINE1, ADAMTS1, LAMB3, SERPINB8, CSPG4, CCDC80	APOE, GPC3, WNT2B, SERPING1, A2M, EGFL7, PCOLCE, BGN, ADAMTS9, TIMP3, PSAP, MDK, ICAM1, GPC6, NPNT, COL9A3, SFRP2, CDON, LAMA1, COL2A1, LAD1, VTN, CTHRC1, MMP9, COL1A2, THBS3, COL6A2, MFAP4, COL6A1, SDC2
iMyoblast vs S2A	CC	Down	GO:0009986	cell surface	444	29	51	0.000155219	4.3987e-09	0.0562605	4.0618e-06	ITGB1, MSN, MIF, SLC7A11, CDH2, HSP90AA1, SLC3A2, PVR, MET, ULBP2, TNFRSF12A, CD59, ENG, PLAUR, ITGA2, IL7R, SIRPA, RALA, SEMA7A, TGFB1, ALCAM, LMO7, CD44, TNFRSF10D, HBEGF, CD274, HMGB1, CSPG4, ANTXR2	CLSTN2, GPC3, FCGRT, RAMP2, LDLR, VAMP5, MME, KCNH2, EGFL7, BGN, ADAMTS9, SULF2, ICAM1, ANK3, RTN4R, GPC6, ITGA1, BST2, LPAR2, CDH5, IQGAP2, CD74, ECE1, UNC5D, CDH3, UNC5C, ITGB8, SSC4D, ADGRF5, SMIM1
iMyoblast vs S2A	CC	Down	GO:0043235	receptor complex	232	9	32	0.244175	1.74914e-08	1	1.14625e-05	ITGB1, BIRC2, MET, ENG, ITGA2, ALCAM, GPRC5A, CAPRIN2, CD44	TM7SF2, TRIL, TNFRSF1B, RAMP2, LDLR, NTRK2, NPNT, PLXNC1, LOXL4, ITGA1, ITGA11, CD74, ITGB8, GPR37, ACVR2B, LIFR, ROR2, CD79B, PLA2R1, GPRC5C, KDR, ITGA8, IL11RA, SHISA9, NR1H3, GRIA1, EPHB3, ITGB2, CD4, FGFR4
iMyoblast vs S2A	CC	Down	GO:0030017	sarcomere	166	9	26	0.107736	3.89183e-07	1	0.000183866	TPM3, TMOD3, CORO1C, PAK1, AHNAK2, NEXN, SLC8A1, PYROXD1, TPM1	LMOD1, TNNI2, MYL1, PDLIM1, MYH3, TNNC1, ACTN2, DES, ANK3, SMPX, TNNI1, TNNC2, RYR1, TNNT2, TNNT3, JPH1, SORBS2, MYL4, ACTA1, CASQ2, ANK1, CACNA1C, KLHL41, MYH7, MYH8, TTN
iMyoblast vs S2A	CC	Down	GO:0043202	lysosomal lumen	75	2	16	0.690869	4.8309e-07	1	0.000223045	HSP90AA1, CSPG4	GPC3, TCN2, BGN, LIPA, PSAP, NEU1, GPC6, ASAH1, HEXA, CD74, NPC2, SDC2, NSG1, EPDR1, LUM, GPC4
iMyoblast vs S2A	CC	Down	GO:0043292	contractile fiber	191	9	28	0.198772	6.26483e-07	1	0.000267756	TPM3, TMOD3, CORO1C, PAK1, AHNAK2, NEXN, SLC8A1, PYROXD1, TPM1	LMOD1, TNNI2, MYLPF, MYL1, PDLIM1, MYH3, TNNC1, ACTN2, DES, ANK3, SMPX, NPNT, TNNI1, TNNC2, RYR1, TNNT2, TNNT3, JPH1, SORBS2, MYL4, ACTA1, CASQ2, ANK1, CACNA1C, KLHL41, MYH7, MYH8, TTN
iMyoblast vs S2A	CC	Down	GO:0005861	troponin complex	8	0	6	1	9.4524e-07	1	0.000384051		TNNI2, TNNC1, TNNI1, TNNC2, TNNT2, TNNT3
iMyoblast vs S2A	CC	Down	GO:0009897	external side of plasma membrane	145	10	22	0.014351	1.29387e-06	0.562442	0.000505479	ITGB1, ULBP2, CD59, ENG, ITGA2, IL7R, SEMA7A, ALCAM, CD274, ANTXR2	FCGRT, LDLR, ICAM1, RTN4R, ITGA1, CDH5, CD74, ECE1, SSC4D, LIFR, CD79B, CD248, IL11RA, VCAM1, AMOT, ITGB2, CD4, WNT2, F10, GPC4, IL1R1, CNTFR
iMyoblast vs S2A	CC	Down	GO:0030016	myofibril	183	9	26	0.168395	2.91989e-06	1	0.000988626	TPM3, TMOD3, CORO1C, PAK1, AHNAK2, NEXN, SLC8A1, PYROXD1, TPM1	LMOD1, TNNI2, MYL1, PDLIM1, MYH3, TNNC1, ACTN2, DES, ANK3, SMPX, TNNI1, TNNC2, RYR1, TNNT2, TNNT3, JPH1, SORBS2, MYL4, ACTA1, CASQ2, ANK1, CACNA1C, KLHL41, MYH7, MYH8, TTN
iMyoblast vs S2A	CC	Down	GO:0005865	striated muscle thin filament	26	3	9	0.0584478	4.26866e-06	0.917856	0.00139868	TPM3, TMOD3, TPM1	LMOD1, TNNI2, TNNC1, TNNI1, TNNC2, TNNT2, TNNT3, ACTA1, TTN
iMyoblast vs S2A	CC	Down	GO:0036379	myofilament	27	3	9	0.0632099	5.81235e-06	0.917856	0.00184497	TPM3, TMOD3, TPM1	LMOD1, TNNI2, TNNC1, TNNI1, TNNC2, TNNT2, TNNT3, ACTA1, TTN
iMyoblast vs S2A	CC	Down	GO:0005796	Golgi lumen	49	2	11	0.454712	1.58758e-05	1	0.00467415	TGFB1, CSPG4	GPC3, PROS1, BGN, GPC6, PCSK5, VTN, SDC2, MMP11, LUM, F10, GPC4
iMyoblast vs S2A	CC	Down	GO:0005775	vacuolar lumen	126	4	19	0.604775	2.01363e-05	1	0.00576154	HSP90AA1, PA2G4, TUBB4B, CSPG4	GPC3, TCN2, BGN, LIPA, PSAP, NEU1, GPC6, ASAH1, HEXA, CD74, NPC2, SDC2, CREG1, NSG1, NHLRC3, DAPK2, EPDR1, LUM, GPC4
iMyoblast vs S2A	CC	Down	GO:0005581	collagen trimer	51	2	11	0.475725	2.38799e-05	1	0.00655604	COL13A1, CCBE1	COLEC12, COL9A3, COL2A1, CTHRC1, COL1A2, EMID1, COL6A2, COL6A1, COL9A2, COL21A1, LUM
iMyoblast vs S2A	CC	Down	GO:0016460	myosin II complex	13	0	6	1	3.36747e-05	1	0.00844569		MYLPF, MYL1, MYH3, MYH10, MYH7, MYH8
iMyoblast vs S2A	CC	Down	GO:0005859	muscle myosin complex	10	0	5	1	9.76798e-05	1	0.0196472		MYLPF, MYL1, MYH3, MYH7, MYH8
iMyoblast vs S2A	CC	Down	GO:0015629	actin cytoskeleton	415	20	39	0.0578312	0.000150173	0.917856	0.0280292	MTPN, SMTN, TPM3, CDH2, TMOD3, CORO1C, MYO5A, PAWR, RFLNB, PAK1, EZR, ZYX, PXN, ANLN, NF2, TPM1, PLS3, CDC42EP3, NOX4, DLC1	LMOD1, TNNI2, MYLPF, PPP1R9A, DCDC2, MYL1, PDLIM1, GAS7, MYH3, TNNC1, ACTN2, MYH10, DAPK1, TNNI1, TNNC2, DENND2A, DAAM1, IQGAP2, TNNT2, LAD1, TNNT3, SORBS2, ADAM17, RHOU, MYL4, GSN, ACTA1, FILIP1, AIF1L, MYH7
iMyoblast vs S2A	CC	Down	GO:0005604	basement membrane	72	5	12	0.0849462	0.000219318	1	0.0368218	TGFBI, NTN4, ADAMTS1, LAMB3, CCDC80	TIMP3, NPNT, LAMA1, COL2A1, LAD1, VTN, COL9A2, SERPINF1, FBLN1, FGF9, SMOC1, SPARC
iMyoblast vs S2A	CC	Down	GO:0098552	side of membrane	284	16	28	0.018669	0.000311313	0.638444	0.0497979	ITGB1, G6PD, BIRC2, ULBP2, CD59, EZR, ENG, ITGA2, IL7R, RASA3, GNGT2, SEMA7A, ALCAM, RACGAP1, CD274, ANTXR2	FCGRT, LDLR, ICAM1, RTN4R, LITAF, ITGA1, CDH5, CD74, ECE1, SSC4D, LIFR, CD79B, PLEKHA4, ANK1, CD248, IL11RA, VCAM1, AMOT, SNAP25, ITGB2, CD4, STAC3, WNT2, F10, SNX18, GPC4, IL1R1, CNTFR
iMyoblast vs S2A	MF	Up	GO:0010997	anaphase-promoting complex binding	7	4	0	5.68549e-05	1	0.0356934	1	UBE2S, PLK1, CDC20, FBXO5
iMyoblast vs S2A	MF	Up	GO:0034713	type I transforming growth factor beta receptor binding	11	4	1	0.000288463	0.427705	0.0749134	1	ENG, TGFB1, SMAD6, SMAD7	ACVR2B
iMyoblast vs S2A	MF	Up	GO:0042056	chemoattractant activity	20	5	2	0.00034463	0.259733	0.0823666	1	MIF, VEGFC, PGF, FGF2, HMGB1	BMP4, SAA1
iMyoblast vs S2A	MF	Up	GO:0008083	growth factor activity	84	9	7	0.00110431	0.104286	0.157986	1	VEGFC, KITLG, PGF, DKK1, TGFB1, FGF2, FGF5, HBEGF, FGF1	MDK, IGF1, BMP4, BMP5, IGF2.1, FGF9, GDF6
iMyoblast vs S2A	MF	Up	GO:0005518	collagen binding	52	7	7	0.00133447	0.0139987	0.169435	0.511376	ITGB1, PAK1, ITGA2, TGFBI, CD44, CCBE1, SMAD7	PCOLCE, ITGA1, ITGA11, VTN, MMP9, LUM, SPARC
iMyoblast vs S2A	MF	Up	GO:0050660	flavin adenine dinucleotide binding	57	7	3	0.00186643	0.520114	0.207825	1	TXNRD1, QSOX1, DPYD, AOX1, NQO2, MICAL2, NOX4	SQLE, DHCR24, MTHFR
iMyoblast vs S2A	MF	Up	GO:0005539	glycosaminoglycan binding	130	11	16	0.00298042	0.0006389	0.262109	0.0829303	PGF, ENG, COL13A1, CYR61, FGF2, CD44, ADAMTS1, FGFRL1, HBEGF, FGF1, CCDC80	APOE, APLP2, PCOLCE, BGN, SULF2, MDK, RTN4R, BMP4, VTN, THBS3, FGFBP3, SAA1, FGF9, FGFR4, SEMA5A, WISP1
iMyoblast vs S2A	MF	Up	GO:0030374	nuclear receptor transcription coactivator activity	60	7	3	0.00314507	0.582548	0.2711	1	NR1D2, FGF2, NCOA7, PPARD, NR1H2, ZMIZ1, HMGA1	ACTN2, CALCOCO1, NR1H3
iMyoblast vs S2A	MF	Up	GO:0030545	receptor regulator activity	225	15	21	0.00342906	0.00186758	0.27954	0.16543	MIF, VEGFC, KITLG, LYPD1, PGF, DKK1, GREM1, SEMA7A, TGFB1, FGF2, FST, FGF5, HBEGF, HMGB1, FGF1	WFIKKN1, C1QTNF4, SEMA6B, MDK, IGF1, CMTM3, BMP4, SFRP2, ADM, DKK2, SEMA6A, BMP5, APLN, FLRT2, FAM3C, SAA1, IGF2.1, FGF9, WNT2, SEMA5A, GDF6
iMyoblast vs S2A	MF	Up	GO:0003955	NAD(P)H dehydrogenase (quinone) activity	3	2	0	0.0035495	1	0.285012	1	NQO1, NQO2
iMyoblast vs S2A	MF	Up	GO:0008201	heparin binding	96	9	13	0.00358383	0.00083474	0.285512	0.0991681	PGF, COL13A1, CYR61, FGF2, ADAMTS1, FGFRL1, HBEGF, FGF1, CCDC80	APOE, APLP2, PCOLCE, MDK, RTN4R, BMP4, VTN, THBS3, FGFBP3, SAA1, FGF9, FGFR4, WISP1
iMyoblast vs S2A	MF	Up	GO:0005104	fibroblast growth factor receptor binding	11	3	2	0.00376853	0.0901511	0.294453	1	FGF2, FGF5, FGF1	FLRT2, FGF9
iMyoblast vs S2A	MF	Up	GO:0050839	cell adhesion molecule binding	434	26	28	0.00399231	0.154873	0.303759	1	ITGB1, MSN, PKM, LDHA, CDH2, SLC3A2, PVR, RANGAP1, TMOD3, TAGLN2, LRRC59, DIAPH3, EZR, ITGA2, SEMA7A, TGFBI, CYR61, FGF2, PXN, GPRC5A, CIP2A, ANLN, PPP1R13L, HMGB1, FGF1, KLC2	CXADR, PDLIM1, CPE, ACTN2, ICAM1, IGF1, ANK3, NPNT, CDH5, SFRP2, PTPRD, LAD1, CDH3, ITGB8, VTN, ADAM17, PPL, TACSTD2, ARVCF, KDR, IGF2.1, VCAM1, ITGB2, CDH18, EPS8L2, PKP2, NISCH, WISP1
iMyoblast vs S2A	MF	Up	GO:0050840	extracellular matrix binding	47	6	6	0.00419903	0.0303956	0.309982	0.756723	ITGB1, PLEKHA2, ITGA2, TGFBI, CYR61, NTN4	BGN, OLFML2A, VTN, CD248, SMOC1, SPARC
iMyoblast vs S2A	MF	Up	GO:0019956	chemokine binding	11	3	1	0.00448358	0.428081	0.319593	1	ITGB1, PLP2, HMGB1	A2M
iMyoblast vs S2A	MF	Up	GO:0070851	growth factor receptor binding	84	8	7	0.00498888	0.114486	0.34444	1	VEGFC, PGF, GREM1, FGF2, FGF5, HBEGF, SOCS5, FGF1	CADM4, CDH5, VAV3, ADAM17, FLRT2, FGF9, IL1R1
iMyoblast vs S2A	MF	Up	GO:0003696	satellite DNA binding	4	2	0	0.00599794	1	0.374917	1	MBD2, CENPB
iMyoblast vs S2A	MF	Up	GO:0005178	integrin binding	102	9	15	0.006078	0.000167604	0.377787	0.0306746	ITGB1, ITGA2, SEMA7A, TGFBI, CYR61, FGF2, PXN, HMGB1, FGF1	CXADR, ACTN2, ICAM1, IGF1, NPNT, SFRP2, ITGB8, VTN, ADAM17, KDR, IGF2.1, VCAM1, ITGB2, NISCH, WISP1
iMyoblast vs S2A	MF	Up	GO:0005172	vascular endothelial growth factor receptor binding	12	3	2	0.00620544	0.120666	0.378479	1	VEGFC, PGF, GREM1	CADM4, CDH5
iMyoblast vs S2A	MF	Up	GO:0015171	amino acid transmembrane transporter activity	40	5	1	0.00645932	0.848727	0.387083	1	SLC7A11, SLC7A1, SLC3A2, SLC1A5, SLC7A6	SLC43A2
iMyoblast vs S2A	MF	Down	GO:0004888	transmembrane signaling receptor activity	345	14	40	0.111202	1.02297e-08	1	7.69692e-06	ADGRB3, MET, GPR176, ENG, ITGA2, IL7R, CRIM1, GPRC5A, F2RL2, CD44, TNFRSF10D, FGFRL1, SPHK1, ANTXR2	TNFRSF1B, RAMP2, NTRK2, PDGFRL, EDNRB, ICAM1, RTN4R, PLXNC1, LPAR2, ITGA11, CD74, PTPRD, IL17RD, UNC5D, GPR153, UNC5C, OPN3, ADGRF5, GPR37, ACVR2B, LIFR, ROR2, CD79B, MCHR1, PLA2R1, ADGRL3, GPRC5C, ZNF219, KDR, IL11RA
iMyoblast vs S2A	MF	Down	GO:0038023	signaling receptor activity	465	22	47	0.0163138	7.71317e-08	0.598222	4.35258e-05	ITGB1, PVR, ADGRB3, NR1D2, MET, RGMB, SLC1A5, GPR176, ENG, PLAUR, ITGA2, IL7R, CRIM1, GPRC5A, F2RL2, PPARD, CD44, NR1H2, TNFRSF10D, FGFRL1, SPHK1, ANTXR2	TNFRSF1B, RAMP2, NTRK2, PDGFRL, EDNRB, PRTG, ICAM1, RTN4R, GPC6, PLXNC1, LPAR2, ITGA11, CD74, PTPRD, IL17RD, UNC5D, GPR153, UNC5C, ITGB8, OPN3, ADGRF5, GPR37, ACVR2B, LIFR, ROR2, CD79B, MCHR1, PLA2R1, ADGRL3, GPRC5C
iMyoblast vs S2A	MF	Down	GO:0060089	molecular transducer activity	465	22	47	0.0163138	7.71317e-08	0.598222	4.35258e-05	ITGB1, PVR, ADGRB3, NR1D2, MET, RGMB, SLC1A5, GPR176, ENG, PLAUR, ITGA2, IL7R, CRIM1, GPRC5A, F2RL2, PPARD, CD44, NR1H2, TNFRSF10D, FGFRL1, SPHK1, ANTXR2	TNFRSF1B, RAMP2, NTRK2, PDGFRL, EDNRB, PRTG, ICAM1, RTN4R, GPC6, PLXNC1, LPAR2, ITGA11, CD74, PTPRD, IL17RD, UNC5D, GPR153, UNC5C, ITGB8, OPN3, ADGRF5, GPR37, ACVR2B, LIFR, ROR2, CD79B, MCHR1, PLA2R1, ADGRL3, GPRC5C
iMyoblast vs S2A	MF	Down	GO:0030414	peptidase inhibitor activity	77	6	17	0.0377673	1.66366e-07	0.760825	8.89401e-05	BIRC2, SERPINB7, CRIM1, PTTG1, SERPINE1, SERPINB8	GPC3, APLP2, SERPING1, PROS1, WFIKKN1, A2M, TIMP3, CST3, SPINT2, BST2, ARRB1, WFDC1, CARD16, LEF1, SERPINF1, DPEP1, PAPLN
iMyoblast vs S2A	MF	Down	GO:0061135	endopeptidase regulator activity	83	7	17	0.0186047	6.18318e-07	0.638444	0.000267756	BIRC2, SERPINB7, PSME3, CRIM1, PTTG1, SERPINE1, SERPINB8	APLP2, SERPING1, PROS1, WFIKKN1, A2M, TIMP3, CST3, SPINT2, BST2, SFRP2, ARRB1, WFDC1, CARD16, LEF1, SERPINF1, DPEP1, PAPLN
iMyoblast vs S2A	MF	Down	GO:0061134	peptidase regulator activity	111	7	20	0.073037	6.3265e-07	0.939675	0.000267756	BIRC2, SERPINB7, PSME3, CRIM1, PTTG1, SERPINE1, SERPINB8	GPC3, APLP2, SERPING1, PROS1, WFIKKN1, A2M, PCOLCE, TIMP3, CST3, SPINT2, BST2, SFRP2, ARRB1, WFDC1, CARD16, LEF1, SERPINF1, FBLN1, DPEP1, PAPLN
iMyoblast vs S2A	MF	Down	GO:0004866	endopeptidase inhibitor activity	76	6	16	0.0359304	7.74997e-07	0.760825	0.000321307	BIRC2, SERPINB7, CRIM1, PTTG1, SERPINE1, SERPINB8	APLP2, SERPING1, PROS1, WFIKKN1, A2M, TIMP3, CST3, SPINT2, BST2, ARRB1, WFDC1, CARD16, LEF1, SERPINF1, DPEP1, PAPLN
iMyoblast vs S2A	MF	Down	GO:0005201	extracellular matrix structural constituent	113	4	19	0.48695	2.24362e-06	1	0.00082871	COL13A1, TGFBI, CYR61, LAMB3	PCOLCE, BGN, NPNT, COL9A3, LAMA1, COL2A1, VTN, CTHRC1, COL1A2, THBS3, COL6A2, MFAP4, COL6A1, COL9A2, FBLN1, COL21A1, CD4, LUM, SPARC
iMyoblast vs S2A	MF	Down	GO:0005509	calcium ion binding	394	10	40	0.790242	6.18399e-06	1	0.00193273	ASPH, NCS1, CDH2, MYO5A, S100A2, SLC8A1, CCBE1, PLS3, PPP2R3A, PCDH10	CLSTN2, MYLPF, MGMT, PROS1, LDLR, MAN1C1, MYL1, TNNC1, EGFL7, RCN1, ACTN2, RASGRP2, SULF2, NPNT, TNNC2, CDH5, RYR1, TNNT2, CDH3, TNNT3, VWCE, SVEP1, DSC2, THBS3, MYL4, P4HTM, GSN, ADGRL3, FAT3, CASQ2
iMyoblast vs S2A	MF	Down	GO:0005159	insulin-like growth factor receptor binding	13	0	6	1	2.60709e-05	1	0.00706173		SOCS1, IGF1, PIK3R1, SOCS2, ARRB1, IGF2.1
iMyoblast vs S2A	MF	Down	GO:0019838	growth factor binding	105	4	16	0.450214	6.69015e-05	1	0.0150543	ENG, CYR61, CRIM1, FGFRL1	WFIKKN1, A2M, NTRK2, IGFBP2, COL2A1, COL1A2, ACVR2B, LIFR, COL6A1, HTRA3, FGFBP3, KDR, IL11RA, FGFR4, WISP1, IL1R1
iMyoblast vs S2A	MF	Down	GO:0008237	metallopeptidase activity	112	6	16	0.138017	8.75713e-05	1	0.0184329	PITRM1, MMP1, METAP1, ADAMTS6, ADAMTS1, TRHDE	CPXM1, CPE, MME, ADAMTS9, CPQ, MMP15, ECE1, ERMP1, MMP9, ADAM17, VASH1, MMP11, MMP23B, DPEP1, VASH2, NPEPL1
iMyoblast vs S2A	MF	Down	GO:0004180	carboxypeptidase activity	26	0	7	1	0.00015039	1	0.0280292		CPXM1, CPE, CPVL, CPQ, MINDY2, VASH1, VASH2
iMyoblast vs S2A	MF	Down	GO:0005178	integrin binding	102	9	15	0.006078	0.000167604	0.377787	0.0306746	ITGB1, ITGA2, SEMA7A, TGFBI, CYR61, FGF2, PXN, HMGB1, FGF1	CXADR, ACTN2, ICAM1, IGF1, NPNT, SFRP2, ITGB8, VTN, ADAM17, KDR, IGF2.1, VCAM1, ITGB2, NISCH, WISP1
iMyoblast vs S2A	MF	Down	GO:0004867	serine-type endopeptidase inhibitor activity	34	4	8	0.0231822	0.000206936	0.710112	0.0350325	SERPINB7, CRIM1, SERPINE1, SERPINB8	APLP2, SERPING1, WFIKKN1, A2M, SPINT2, WFDC1, SERPINF1, PAPLN
iMyoblast vs S2A	MF	Down	GO:0004857	enzyme inhibitor activity	238	10	25	0.246533	0.000366192	1	0.0563576	OAZ1, BIRC2, CDKN2C, SERPINB7, ANP32E, CRIM1, PTTG1, SERPINE1, SERPINB8, FBXO5	SOCS1, APOC1, GPC3, APLP2, SERPING1, PROS1, WFIKKN1, A2M, TIMP3, CST3, SPINT2, BST2, IQGAP2, QARS, ARRB1, WFDC1, TXNIP, SCG5, CARD16, INKA1, LEF1, SERPINF1, DPEP1, PAPLN, CDKN1C
iMyoblast vs S2A	MF	Down	GO:0008235	metalloexopeptidase activity	39	2	8	0.342735	0.000433497	1	0.0633561	METAP1, TRHDE	CPXM1, CPE, CPQ, MMP15, VASH1, DPEP1, VASH2, NPEPL1
iMyoblast vs S2A	MF	Down	GO:0005539	glycosaminoglycan binding	130	11	16	0.00298042	0.0006389	0.262109	0.0829303	PGF, ENG, COL13A1, CYR61, FGF2, CD44, ADAMTS1, FGFRL1, HBEGF, FGF1, CCDC80	APOE, APLP2, PCOLCE, BGN, SULF2, MDK, RTN4R, BMP4, VTN, THBS3, FGFBP3, SAA1, FGF9, FGFR4, SEMA5A, WISP1
iMyoblast vs S2A	MF	Down	GO:0030020	extracellular matrix structural constituent conferring tensile strength	31	1	7	0.637274	0.000655458	1	0.0842762	COL13A1	COL9A3, COL2A1, COL1A2, COL6A2, COL6A1, COL9A2, COL21A1
iMyoblast vs S2A	MF	Down	GO:0004930	G protein-coupled receptor activity	137	5	15	0.324551	0.000702533	1	0.0886457	ADGRB3, GPR176, GPRC5A, F2RL2, SPHK1	RAMP2, PDGFRL, EDNRB, LPAR2, GPR153, OPN3, ADGRF5, GPR37, MCHR1, ADGRL3, GPRC5C, ZNF219, ADGRL2, GPR143, HTR2B
iMyoblast vs S2A	KEGG	Up	hsa04350	TGF-beta signaling pathway	78	11	6	0.000121629	0.269495	0.0224557	1	ID1, ID2, PPP2CB, RGMB, SMAD9, ID3, GREM1, TGFB1, FST, SMAD6, SMAD7	SMAD1, BMP4, E2F5, ACVR2B, BMP5, GDF6
iMyoblast vs S2A	KEGG	Up	hsa05200	Pathways in cancer	404	30	29	0.000148223	0.0904483	0.0224557	0.706759	TXNRD1, ITGB1, MMP1, TPM3, NQO1, VEGFC, BIRC2, HRAS, HSP90AA1, KITLG, HIF1A, PLCG2, MET, CYCS, PGF, ITGA2, IL7R, RALA, GNGT2, TGFB1, CCND1, FGF2, PPARD, MAPK8, AKT3, FGF5, LAMB3, CDK2, FGF1, DVL1	RUNX1T1, WNT2B, RASGRP2, EDNRB, IGF1, DAPK1, PIK3R1, BMP4, LPAR2, BCL2L11, LAMA1, PIK3R3, MMP9, CCND2, MAPK10, CCND3, SKP2, ZBTB16, EGLN3, LEF1, GSTA4, BBC3, IGF2.1, STAT2, FGF9, DAPK2, FGFR4, WNT2, GADD45G
iMyoblast vs S2A	KEGG	Up	hsa05230	Central carbon metabolism in cancer	56	9	2	0.000225541	0.840698	0.0224557	1	PKM, LDHA, G6PD, HRAS, HIF1A, MET, SLC16A3, SLC1A5, AKT3	PIK3R1, PIK3R3
iMyoblast vs S2A	KEGG	Up	hsa05205	Proteoglycans in cancer	174	17	18	0.000267329	0.00958855	0.0224557	0.178986	ITGB1, MSN, HRAS, HIF1A, PLCG2, MET, PAK1, EZR, PLAUR, ITGA2, TGFB1, CCND1, FGF2, PXN, CD44, AKT3, HBEGF	GPC3, WNT2B, TIMP3, IGF1, ANK3, PIK3R1, PDCD4, VTN, PIK3R3, MMP9, VAV3, COL1A2, SDC2, ANK1, KDR, IGF2.1, LUM, WNT2
iMyoblast vs S2A	KEGG	Up	hsa04014	Ras signaling pathway	167	16	11	0.000381031	0.322153	0.0256053	1	VEGFC, HRAS, KITLG, PLCG2, MET, PAK1, PGF, RASA3, RALA, GNGT2, FGF2, MAPK8, AKT3, SHC3, FGF5, FGF1	NTRK2, RASGRP2, IGF1, PIK3R1, SHC2, PIK3R3, MAPK10, KDR, IGF2.1, FGF9, FGFR4
iMyoblast vs S2A	KEGG	Up	hsa04510	Focal adhesion	172	16	23	0.000706687	9.59943e-05	0.0395745	0.00806352	ITGB1, VEGFC, BIRC2, HRAS, DIAPH1, MET, PAK1, PGF, ITGA2, ZYX, CCND1, PXN, MAPK8, AKT3, SHC3, LAMB3	MYLPF, IGF1, PIK3R1, ITGA1, COL9A3, ITGA11, LAMA1, COL2A1, ITGB8, SHC2, VTN, PIK3R3, CCND2, VAV3, COL1A2, THBS3, MAPK10, CCND3, COL6A2, COL6A1, COL9A2, KDR, ITGA8
iMyoblast vs S2A	KEGG	Up	hsa04151	PI3K-Akt signaling pathway	257	20	26	0.00118805	0.00207657	0.0556774	0.0775251	ITGB1, VEGFC, HRAS, HSP90AA1, KITLG, PPP2CB, MET, PGF, ITGA2, IL7R, EIF4EBP1, GNGT2, CCND1, FGF2, AKT3, FGF5, LAMB3, CDK2, PPP2R3A, FGF1	NTRK2, IGF1, PIK3R1, ITGA1, COL9A3, LPAR2, BCL2L11, ITGA11, LAMA1, COL2A1, DDIT4, ITGB8, VTN, PIK3R3, CCND2, COL1A2, THBS3, CCND3, COL6A2, COL6A1, COL9A2, KDR, ITGA8, IGF2.1, FGF9, FGFR4
iMyoblast vs S2A	KEGG	Up	hsa04933	AGE-RAGE signaling pathway in diabetic complications	88	10	6	0.00132565	0.361349	0.0556774	1	VEGFC, HRAS, DIAPH1, PLCG2, TGFB1, CCND1, SERPINE1, MAPK8, AKT3, NOX4	ICAM1, PIK3R1, PIK3R3, COL1A2, MAPK10, VCAM1
iMyoblast vs S2A	KEGG	Up	hsa04015	Rap1 signaling pathway	159	14	13	0.0019454	0.100384	0.0726283	0.724804	ITGB1, VEGFC, ID1, HRAS, KITLG, MET, PGF, RALA, FGF2, SIPA1L1, AKT3, FGF5, FGF1, MAP2K3	PARD6B, RASGRP2, IGF1, PIK3R1, LPAR2, PIK3R3, VAV3, EVL, MAP2K6, KDR, FGF9, ITGB2, FGFR4
iMyoblast vs S2A	KEGG	Up	hsa05226	Gastric cancer	110	11	8	0.002192	0.263502	0.0736513	1	HRAS, MET, TGFB1, CCND1, FGF2, AKT3, SHC3, FGF5, CDK2, FGF1, DVL1	WNT2B, PIK3R1, SHC2, PIK3R3, LEF1, FGF9, WNT2, GADD45G
iMyoblast vs S2A	KEGG	Up	hsa04012	ErbB signaling pathway	73	8	4	0.00538503	0.592456	0.158722	1	HRAS, PLCG2, PAK1, EIF4EBP1, MAPK8, AKT3, SHC3, HBEGF	PIK3R1, SHC2, PIK3R3, MAPK10
iMyoblast vs S2A	KEGG	Up	hsa05218	Melanoma	58	7	5	0.00566865	0.230867	0.158722	0.953358	HRAS, MET, CCND1, FGF2, AKT3, FGF5, FGF1	IGF1, PIK3R1, PIK3R3, FGF9, GADD45G
iMyoblast vs S2A	KEGG	Up	hsa04068	FoxO signaling pathway	111	10	11	0.00784802	0.0453478	0.179562	0.491044	HRAS, KLF2, IL7R, TGFB1, CCND1, MAPK8, AKT3, PLK1, CDK2, BNIP3	IGF1, PIK3R1, BCL2L11, PIK3R3, CCND2, MAPK10, SKP2, CCNG2, GABARAPL1, FOXO6, GADD45G
iMyoblast vs S2A	KEGG	Up	hsa04390	Hippo signaling pathway	130	11	13	0.00833261	0.0284133	0.179562	0.395946	ID1, BIRC2, ID2, PPP2CB, TGFB1, CCND1, SERPINE1, NF2, FGF1, DVL1, SMAD7	WNT2B, PARD6B, SMAD1, BMP4, CCND2, CCND3, BMP5, LEF1, BBC3, AMOT, ITGB2, WNT2, GDF6
iMyoblast vs S2A	KEGG	Up	hsa04640	Hematopoietic cell lineage	35	5	5	0.00837328	0.0416	0.179562	0.46592	KITLG, CD59, ITGA2, IL7R, CD44	MME, ITGA1, IL11RA, CD4, IL1R1
iMyoblast vs S2A	KEGG	Up	hsa05145	Toxoplasmosis	80	8	5	0.00855058	0.455982	0.179562	1	ITGB1, BIRC2, CYCS, TGFB1, MAPK8, AKT3, LAMB3, MAP2K3	SOCS1, LDLR, LAMA1, MAPK10, MAP2K6
iMyoblast vs S2A	KEGG	Up	hsa04810	Regulation of actin cytoskeleton	167	13	15	0.0102918	0.0530822	0.203414	0.524577	ITGB1, MSN, HRAS, DIAPH1, PAK1, DIAPH3, LIMK2, EZR, ITGA2, FGF2, PXN, FGF5, FGF1	MYLPF, MYH10, PIK3R1, ITGA1, LPAR2, IQGAP2, ITGA11, ITGB8, PIK3R3, VAV3, GSN, ITGA8, FGF9, ITGB2, FGFR4
iMyoblast vs S2A	KEGG	Up	hsa04114	Oocyte meiosis	98	9	2	0.0110041	0.978353	0.205409	1	PPP2CB, AURKA, PTTG1, PLK1, CDK2, CDC20, BUB1, FBXO5, SGO1	REC8, IGF1
iMyoblast vs S2A	KEGG	Up	hsa05222	Small cell lung cancer	84	8	6	0.0121014	0.328768	0.208099	1	ITGB1, BIRC2, CYCS, ITGA2, CCND1, AKT3, LAMB3, CDK2	PIK3R1, LAMA1, FHIT, PIK3R3, SKP2, GADD45G
iMyoblast vs S2A	KEGG	Up	hsa05414	Dilated cardiomyopathy	69	7	12	0.0128719	0.000346485	0.208099	0.0180434	ITGB1, TPM3, LMNA, ITGA2, SLC8A1, TGFB1, TPM1	TNNC1, DES, IGF1, ITGA1, ITGA11, LAMA1, TNNT2, ITGB8, CACNA1C, MYH7, ITGA8, TTN
iMyoblast vs S2A	KEGG	Down	hsa00100	Steroid biosynthesis	17	0	10	1	4.28802e-09	1	1.44077e-06		SQLE, MSMO1, TM7SF2, FDFT1, LSS, LIPA, DHCR7, NSDHL, DHCR24, HSD17B7
iMyoblast vs S2A	KEGG	Down	hsa04512	ECM-receptor interaction	64	4	14	0.207657	7.27583e-06	0.730207	0.00122234	ITGB1, ITGA2, CD44, LAMB3	NPNT, ITGA1, COL9A3, ITGA11, LAMA1, COL2A1, ITGB8, VTN, COL1A2, THBS3, COL6A2, COL6A1, COL9A2, ITGA8
iMyoblast vs S2A	KEGG	Down	hsa00900	Terpenoid backbone biosynthesis	20	0	7	1	7.48404e-05	1	0.00806352		HMGCS1, IDI1, FDPS, HMGCR, MVD, ACAT2, MVK
iMyoblast vs S2A	KEGG	Down	hsa04510	Focal adhesion	172	16	23	0.000706687	9.59943e-05	0.0395745	0.00806352	ITGB1, VEGFC, BIRC2, HRAS, DIAPH1, MET, PAK1, PGF, ITGA2, ZYX, CCND1, PXN, MAPK8, AKT3, SHC3, LAMB3	MYLPF, IGF1, PIK3R1, ITGA1, COL9A3, ITGA11, LAMA1, COL2A1, ITGB8, SHC2, VTN, PIK3R3, CCND2, VAV3, COL1A2, THBS3, MAPK10, CCND3, COL6A2, COL6A1, COL9A2, KDR, ITGA8
iMyoblast vs S2A	KEGG	Down	hsa05414	Dilated cardiomyopathy	69	7	12	0.0128719	0.000346485	0.208099	0.0180434	ITGB1, TPM3, LMNA, ITGA2, SLC8A1, TGFB1, TPM1	TNNC1, DES, IGF1, ITGA1, ITGA11, LAMA1, TNNT2, ITGB8, CACNA1C, MYH7, ITGA8, TTN
iMyoblast vs S2A	KEGG	Down	hsa05410	Hypertrophic cardiomyopathy	69	7	12	0.0130337	0.000354262	0.208099	0.0180434	ITGB1, TPM3, LMNA, ITGA2, SLC8A1, TGFB1, TPM1	TNNC1, DES, IGF1, ITGA1, ITGA11, LAMA1, TNNT2, ITGB8, CACNA1C, MYH7, ITGA8, TTN
iMyoblast vs S2A	KEGG	Down	hsa05412	Arrhythmogenic right ventricular cardiomyopathy	60	5	11	0.0683462	0.000375904	0.433289	0.0180434	ITGB1, CDH2, LMNA, ITGA2, SLC8A1	ACTN2, DES, ITGA1, ITGA11, LAMA1, ITGB8, DSC2, CACNA1C, LEF1, ITGA8, PKP2
iMyoblast vs S2A	KEGG	Down	hsa04979	Cholesterol metabolism	30	1	7	0.679876	0.0010734	1	0.0450826	NCEH1	APOE, APOC1, LDLR, MYLIP, PLTP, LIPA, NPC2
iMyoblast vs S2A	KEGG	Down	hsa04151	PI3K-Akt signaling pathway	257	20	26	0.00118805	0.00207657	0.0556774	0.0775251	ITGB1, VEGFC, HRAS, HSP90AA1, KITLG, PPP2CB, MET, PGF, ITGA2, IL7R, EIF4EBP1, GNGT2, CCND1, FGF2, AKT3, FGF5, LAMB3, CDK2, PPP2R3A, FGF1	NTRK2, IGF1, PIK3R1, ITGA1, COL9A3, LPAR2, BCL2L11, ITGA11, LAMA1, COL2A1, DDIT4, ITGB8, VTN, PIK3R3, CCND2, COL1A2, THBS3, CCND3, COL6A2, COL6A1, COL9A2, KDR, ITGA8, IGF2.1, FGF9, FGFR4
iMyoblast vs S2A	KEGG	Down	hsa05144	Malaria	27	2	6	0.25107	0.0026371	0.739995	0.0845351	MET, TGFB1	ICAM1, GYPC, THBS3, SDC2, VCAM1, ITGB2
iMyoblast vs S2A	KEGG	Down	hsa04310	Wnt signaling pathway	123	8	15	0.0814643	0.00300295	0.474669	0.0845351	CACYBP, DKK1, FOSL1, CCND1, PPARD, MAPK8, VANGL1, DVL1	WNT2B, DAAM1, SFRP2, DKK2, CCND2, ROR2, MAPK10, CCND3, LEF1, SERPINF1, DAAM2, WNT2, WISP1, GPC4, PRICKLE1
iMyoblast vs S2A	KEGG	Down	hsa03320	PPAR signaling pathway	46	4	8	0.0833496	0.00301911	0.474669	0.0845351	MMP1, PPARD, FABP4, ME1	HMGCS1, FABP3, SCD, PLTP, ME3, SLC27A2, NR1H3, SORBS1
iMyoblast vs S2A	KEGG	Down	hsa04930	Type II diabetes mellitus	29	2	6	0.280213	0.00397699	0.765459	0.10279	PKM, MAPK8	SOCS1, PIK3R1, SOCS2, PIK3R3, MAPK10, CACNA1C
iMyoblast vs S2A	KEGG	Down	hsa04974	Protein digestion and absorption	48	4	8	0.100492	0.00457544	0.503962	0.109811	SLC3A2, SLC1A5, COL13A1, SLC8A1	MME, COL9A3, COL2A1, COL1A2, COL6A2, COL6A1, COL9A2, COL21A1
iMyoblast vs S2A	KEGG	Down	hsa05418	Fluid shear stress and atherosclerosis	116	5	14	0.442101	0.00548051	0.937568	0.122763	NQO1, HSP90AA1, KLF2, MAPK8, AKT3	ICAM1, PIK3R1, BMP4, CDH5, PIK3R3, MMP9, ACVR2B, MAPK10, SDC2, MAP2K6, KDR, GSTA4, VCAM1, IL1R1
iMyoblast vs S2A	KEGG	Down	hsa04610	Complement and coagulation cascades	32	4	6	0.0271862	0.0068637	0.33802	0.144138	CD59, PLAUR, F2RL2, SERPINE1	SERPING1, PROS1, A2M, VTN, ITGB2, F10
iMyoblast vs S2A	KEGG	Down	hsa00072	Synthesis and degradation of ketone bodies	8	0	3	1	0.0082374	1	0.16281		HMGCS1, ACAT2, HMGCL
iMyoblast vs S2A	KEGG	Down	hsa05205	Proteoglycans in cancer	174	17	18	0.000267329	0.00958855	0.0224557	0.178986	ITGB1, MSN, HRAS, HIF1A, PLCG2, MET, PAK1, EZR, PLAUR, ITGA2, TGFB1, CCND1, FGF2, PXN, CD44, AKT3, HBEGF	GPC3, WNT2B, TIMP3, IGF1, ANK3, PIK3R1, PDCD4, VTN, PIK3R3, MMP9, VAV3, COL1A2, SDC2, ANK1, KDR, IGF2.1, LUM, WNT2
iMyoblast vs S2A	KEGG	Down	hsa04670	Leukocyte transendothelial migration	81	5	10	0.187842	0.0153789	0.701275	0.262993	ITGB1, MSN, PLCG2, EZR, PXN	MYLPF, CLDN6, ICAM1, PIK3R1, CDH5, PIK3R3, MMP9, VAV3, VCAM1, ITGB2
iMyoblast vs S2A	KEGG	Down	hsa00140	Steroid hormone biosynthesis	19	0	4	1	0.0164223	1	0.262993		CYP1B1, HSD11B1L, HSD17B7, HSD17B8

## Sheet: iMyoblast vs S2B
Supplementary file 2. Top 20 Up and Down GO terms (BP, CC, MF) and KEGG pathways for pairwise cell type comparisons. Terms comprising N (< 500) genes are sorted by P.Up and P.Down. For each term, the top Genes.Up and Genes.Down are listed.
Comparison	Ont	Dir	GO/KEGG ID	GO Term / KEGG Pathway (top 20 Up and Down)	N	Up	Down	P.Up	P.Down	FDR.Up	FDR.Down	Genes.Up (limited to a maximum of the top 30 Up genes)	Genes.Down (limited to a maximum of the top 30 Down genes)
iMyoblast vs S2B	BP	Up	GO:0048514	blood vessel morphogenesis	454	101	66	1.15281e-17	0.0171106	2.34193e-13	0.41185	TGFB1, ITGB1, ENG, ARHGAP22, TGFBI, MYO1E, ID1, CDH2, MMP2, ETS1, GREM1, ADAM15, HOXA3, SMAD7, MMP14, FGF2, VEGFC, THY1, SPHK1, FAM129B, CIB1, FN1, HMGA2, GATA2, NRP1, ITGA5, ELK3, LRP1, CYR61, MYH9	VASH2, RBPJ, SEMA6A, JAM3, SEMA3E, DAG1, FOLR1, EMC10, CHD7, SMAD1, DLL1, FBXW7, FGF9, LDLR, APOE, CITED1, HIF3A, VASH1, BTG1, DYSF, PRKX, TNNI3, MYO18B, KLF5, VAV3, BMP4, CTNNB1, ERBB2, PROX1, ADAMTS9
iMyoblast vs S2B	BP	Up	GO:0001525	angiogenesis	378	85	52	2.26994e-15	0.071161	1.15285e-11	0.935081	ITGB1, ENG, ARHGAP22, TGFBI, ID1, MMP2, ETS1, GREM1, ADAM15, HOXA3, MMP14, FGF2, VEGFC, THY1, SPHK1, FAM129B, CIB1, FN1, HMGA2, GATA2, NRP1, ITGA5, ELK3, CYR61, MYH9, EPHA2, SERPINE1, SP100, SPRED1, FOXC2	VASH2, RBPJ, SEMA6A, JAM3, SEMA3E, DAG1, EMC10, SMAD1, DLL1, FBXW7, FGF9, HIF3A, VASH1, BTG1, DYSF, PRKX, KLF5, VAV3, BMP4, CTNNB1, ERBB2, ADAMTS9, MDK, RAMP1, STARD13, TSPAN12, SERPINF1, RAMP2, LAMA5, RLN2
iMyoblast vs S2B	BP	Up	GO:0006954	inflammatory response	396	85	41	7.74241e-14	0.767722	3.14574e-10	1	TGFB1, HLA-E, METRNL, NR1D2, RABGEF1, SEMA7A, SIRPA, SIGIRR, NFKBIA, PXK, BIRC2, ETS1, ITGA2, ZYX, CD44, RIPK2, SPHK1, FN1, AXL, TCIRG1, NFKBIZ, RPS6KA4, SCN9A, SDC1, LRP1, TRADD, TLR4, EPHA2, SERPINE1, ABHD12	RBPJ, IL17B, JAM3, C5, SMAD1, IL34, CD36, MVK, LDLR, APOE, C1QTNF3, CSRP3, TSPAN2, ITGB6, TRIL, RPS6KA5, MDK, EDNRB, KDM6B, PJA2, ADORA1, SERPINF1, GPRC5B, TNFRSF1B, CCL20, CD200, ITGB2, HDAC9, PTPN2, BCL6
iMyoblast vs S2B	BP	Up	GO:0030155	regulation of cell adhesion	474	93	62	4.52189e-13	0.105362	1.31232e-09	0.989052	TGFB1, HLA-E, FLNA, DOCK5, TGFBI, PLEKHA2, PTPRJ, FXYD5, UBASH3B, SIRPA, ARHGDIA, GLI2, ETS1, BAD, ADAM15, ITGA2, SMAD7, IL7R, MMP14, CD44, RIPK2, SLC9A1, TFE3, THY1, IQGAP1, CIB1, DLC1, PAWR, ADAM9, FN1	ERBB3, GPM6B, SEMA6A, SEMA3E, NPNT, DAG1, RIPOR2, PLXNA1, DLL1, MACF1, CD36, CASS4, FAM49B, DYSF, JAG2, PRKX, SPINT2, EMILIN2, ARHGAP6, PRKAR1A, NUAK1, ICOSLG, FYN, VAV3, BMP4, ERBB2, JAM2, ITGA4, DDR1, MDK
iMyoblast vs S2B	BP	Up	GO:0030198	extracellular matrix organization	269	63	42	6.44132e-13	0.0127059	1.63569e-09	0.35023	TGFB1, ITGB1, COL13A1, ENG, MMP1, TGFBI, MYO1E, QSOX1, PLOD3, ITGB5, MMP2, ETS1, GREM1, ADAM15, ITGA2, MMP14, CD44, LAMB3, FGF2, CTSL, PLOD2, FN1, CCDC80, ITGA5, LRP1, CYR61, SOX9, THSD4, SERPINE1, ITGA3	GPM6B, JAM3, TMEM38B, NPNT, DAG1, OLFML2A, ADAMTS5, SPINT2, COL19A1, ADAMTSL4, SCX, FGFR4, ITGB6, JAM2, ITGA4, DDR1, ADAMTS9, COL2A1, MMP15, FLRT2, COL25A1, A2M, ITGA7, BCAN, RAMP2, LAMA5, LOXL4, LAMA1, ADAM12, COL9A3
iMyoblast vs S2B	BP	Up	GO:0043062	extracellular structure organization	270	63	43	7.57672e-13	0.00839434	1.71023e-09	0.273451	TGFB1, ITGB1, COL13A1, ENG, MMP1, TGFBI, MYO1E, QSOX1, PLOD3, ITGB5, MMP2, ETS1, GREM1, ADAM15, ITGA2, MMP14, CD44, LAMB3, FGF2, CTSL, PLOD2, FN1, CCDC80, ITGA5, LRP1, CYR61, SOX9, THSD4, SERPINE1, ITGA3	GPM6B, JAM3, TMEM38B, NPNT, DAG1, OLFML2A, ADAMTS5, SPINT2, COL19A1, ADAMTSL4, SCX, FGFR4, ITGB6, TEX14, JAM2, ITGA4, DDR1, ADAMTS9, COL2A1, MMP15, FLRT2, COL25A1, A2M, ITGA7, BCAN, RAMP2, LAMA5, LOXL4, LAMA1, ADAM12
iMyoblast vs S2B	BP	Up	GO:0051272	positive regulation of cellular component movement	411	81	43	6.74778e-12	0.676693	1.14234e-08	1	KITLG, TGFB1, ITGB1, FLNA, DOCK5, CPNE3, CAVIN1, SEMA7A, DIAPH1, HBEGF, ETS1, ITGA2, MMP14, FGF2, VEGFC, THY1, SPHK1, IQGAP1, CIB1, ADAM9, FN1, PAK1, GATA2, NRP1, ITGA5, SEMA4B, MET, GNAI2, LRP1, CYR61	SEMA6A, SEMA6B, SEMA3E, RIPOR2, EMC10, TUBB2B, MSTN, ARHGEF2, ATP2A1, FGF9, SRGAP2C, CASS4, SEMA6C, DYSF, BMP4, ITGA4, PROX1, MDK, GLIPR2, SPOCK2, CCL20, BORCS5, ACKR3, MEGF8, TNFRSF18, HSPB1, PDGFD, HDAC9, FAM83H, TCAF2
iMyoblast vs S2B	BP	Up	GO:2000147	positive regulation of cell motility	398	79	37	7.87641e-12	0.889192	1.14547e-08	1	KITLG, TGFB1, ITGB1, FLNA, DOCK5, CPNE3, CAVIN1, SEMA7A, DIAPH1, HBEGF, ETS1, ITGA2, MMP14, FGF2, VEGFC, THY1, SPHK1, IQGAP1, CIB1, ADAM9, FN1, PAK1, GATA2, NRP1, ITGA5, SEMA4B, MET, GNAI2, LRP1, CYR61	SEMA6A, SEMA6B, SEMA3E, RIPOR2, EMC10, MSTN, ARHGEF2, FGF9, SRGAP2C, CASS4, SEMA6C, DYSF, BMP4, ITGA4, PROX1, MDK, GLIPR2, SPOCK2, CCL20, ACKR3, TNFRSF18, HSPB1, PDGFD, HDAC9, FAM83H, TCAF2, SEMA6D, SPRY2, IGF1, EPB41L5
iMyoblast vs S2B	BP	Up	GO:0030335	positive regulation of cell migration	390	78	35	7.89396e-12	0.925206	1.14547e-08	1	KITLG, TGFB1, ITGB1, FLNA, DOCK5, CPNE3, SEMA7A, DIAPH1, HBEGF, ETS1, ITGA2, MMP14, FGF2, VEGFC, THY1, SPHK1, IQGAP1, CIB1, ADAM9, FN1, PAK1, GATA2, NRP1, ITGA5, SEMA4B, MET, GNAI2, LRP1, CYR61, SOX9	SEMA6A, SEMA6B, SEMA3E, RIPOR2, EMC10, MSTN, ARHGEF2, FGF9, SRGAP2C, CASS4, SEMA6C, DYSF, BMP4, ITGA4, PROX1, MDK, GLIPR2, CCL20, ACKR3, TNFRSF18, HSPB1, PDGFD, HDAC9, FAM83H, TCAF2, SEMA6D, SPRY2, IGF1, EPB41L5, FOXO4
iMyoblast vs S2B	BP	Up	GO:0030855	epithelial cell differentiation	411	80	61	1.418e-11	0.00932641	1.92044e-08	0.295489	TGFB1, CBR1, CTSB, TAGLN2, FLNA, ENG, MSN, MYO1E, ID1, CDH2, PLOD3, SLC7A11, BAD, ITGA2, SKIL, KRT7, TGFB1I1, IQGAP1, RARG, ADAM9, CTSL, NRP1, ID3, MET, SDC1, SOX9, EPHA2, EZR, SERPINE1, NF2	RBPJ, MEF2C, SOX8, TMEM38B, CLDN5, RIPOR2, ASAH1, RFX3, AQP3, ZEB2, DLL1, RAPGEF1, TMOD1, MTSS1, CDKN1C, PITX3, SCRIB, ACVR2B, MYCL, CITED1, SHROOM3, SOX11, BTG1, JAG2, PRKX, SPINT2, PKP2, BDH2, ADAMTSL4, SCX
iMyoblast vs S2B	BP	Up	GO:0040017	positive regulation of locomotion	407	79	40	2.4821e-11	0.808562	3.1515e-08	1	KITLG, TGFB1, ITGB1, FLNA, DOCK5, CPNE3, CAVIN1, SEMA7A, DIAPH1, HBEGF, ETS1, ITGA2, MMP14, FGF2, VEGFC, THY1, SPHK1, IQGAP1, CIB1, ADAM9, FN1, PAK1, GATA2, NRP1, ITGA5, SEMA4B, MET, GNAI2, LRP1, CYR61	SEMA6A, SEMA6B, SEMA3E, RIPOR2, EMC10, TUBB2B, MSTN, ARHGEF2, FGF9, SRGAP2C, CASS4, SEMA6C, DYSF, BMP4, ITGA4, PROX1, MDK, BVES, GLIPR2, SPOCK2, CCL20, ACKR3, MEGF8, TNFRSF18, HSPB1, PDGFD, HDAC9, FAM83H, TCAF2, SEMA6D
iMyoblast vs S2B	BP	Up	GO:0045765	regulation of angiogenesis	214	51	32	8.21752e-11	0.0532339	9.81994e-08	0.805847	ITGB1, ENG, ID1, ETS1, FGF2, VEGFC, SPHK1, FAM129B, CIB1, HMGA2, GATA2, NRP1, ITGA5, EPHA2, SERPINE1, SP100, SPRED1, FOXC2, ECSCR, HIF1A, EPN2, HGS, PGF, RRAS, ADGRB3, CREB3L1, PLK2, CXCL8, AKT3, BMPER	VASH2, SEMA6A, SEMA3E, EMC10, SMAD1, DLL1, FBXW7, VASH1, BTG1, CTNNB1, ERBB2, ADAMTS9, MDK, STARD13, TSPAN12, SERPINF1, RAMP2, RLN2, ADAM12, EMP2, ITGB2, ITGB8, HSPB1, HDAC9, AQP1, ADGRB1, NGFR, SPRY2, CHI3L1, FOXO4
iMyoblast vs S2B	BP	Up	GO:1901342	regulation of vasculature development	241	55	36	8.79125e-11	0.0429819	9.9219e-08	0.701906	ITGB1, ENG, ID1, ETS1, FGF2, VEGFC, SPHK1, FAM129B, CIB1, HMGA2, GATA2, NRP1, ITGA5, SERPINB7, EPHA2, SERPINE1, SP100, SPRED1, FOXC2, XDH, ECSCR, HIF1A, EPN2, HGS, PGF, RRAS, ADGRB3, CREB3L1, PLK2, CXCL8	VASH2, SEMA6A, SEMA3E, EMC10, SMAD1, DLL1, FBXW7, FGF9, VASH1, BTG1, BMP4, CTNNB1, ERBB2, ADAMTS9, MDK, STARD13, TSPAN12, SERPINF1, RAMP2, RLN2, ADAM12, EMP2, ITGB2, ITGB8, HSPB1, PDGFD, HDAC9, AQP1, ADGRB1, NGFR
iMyoblast vs S2B	BP	Up	GO:0034329	cell junction assembly	307	64	43	1.46598e-10	0.0697666	1.48907e-07	0.930228	FLNA, CLSTN1, TLN1, PTPRJ, CDH2, KIRREL3, ITGA2, SMAD7, ACTN1, MMP14, LAMB3, ESAM, SLC9A1, THY1, IQGAP1, DLC1, FN1, NRP1, ITGA5, AMIGO2, LRP1, DVL1, RHOC, EPHA2, CD9, ACTB, NRG1, WDR1, ACTG1, CNTNAP1	ACTN2, GPM6B, PTPRD, MEF2C, CLDN5, SORBS1, PPP1R9A, LRTM1, SDK2, CLSTN2, ACHE, RAPGEF1, MACF1, LRRN1, CDH15, ANK2, PKP2, ARHGAP6, CDH7, CTNNB1, ARVCF, MUSK, GPC4, FLRT2, RAMP2, SIX4, LAMA5, ADGRL3, SPOCK2, PCLO
iMyoblast vs S2B	BP	Up	GO:0032963	collagen metabolic process	77	27	8	1.95415e-10	0.613397	1.89041e-07	1	TGFB1, P3H3, LARP6, ITGB1, CTSB, COL13A1, ENG, MMP1, ID1, PLOD3, MMP2, ADAM15, ITGA2, MMP14, CTSL, PLOD2, SERPINB7, VIM, HIF1A, PPARD, CREB3L1, MMP16, MRC2, TRAM2, FURIN, ARRB2, RCN3	COL19A1, SCX, PHYKPL, BMP4, MMP15, TGFB3, TNXB, VSIR
iMyoblast vs S2B	BP	Up	GO:0009611	response to wounding	462	84	64	2.23259e-10	0.0356114	2.00981e-07	0.638522	TGFB1, FLNA, TLN1, RANGAP1, UBASH3B, HBEGF, SLC7A11, PEAR1, ETS1, ADAM15, ITGA2, PLAUR, CD44, PROCR, FGF2, PLCG2, F2RL2, CERS2, FN1, AXL, PAK1, GATA2, NRP1, EHD3, ITGA5, ID3, ELK3, SDC1, LRP1, CYR61	MRLN, ERBB3, MYOG, MYMX, JAM3, TRIM72, DAG1, FOLR1, CAV3, DOCK11, MSTN, ACHE, HMGCR, RTN4R, MACF1, SCRIB, CD36, CADM4, APOE, VASH1, F13A1, ENO3, SGCA, DYSF, PRKAR1A, FYN, KLF5, VAV3, SH2B2, FZD9
iMyoblast vs S2B	BP	Up	GO:0043410	positive regulation of MAPK cascade	351	70	54	2.27544e-10	0.010581	2.00981e-07	0.31987	KITLG, TGFB1, SORBS3, SH3RF1, PDE8A, PTPRJ, SEMA7A, CDH2, MLKL, CD44, FGF2, RIPK2, SPHK1, IQGAP1, CIB1, ADAM9, PAK1, NRP1, UBE2V1, TAOK3, MINK1, NQO2, GNAI2, LRP1, TLR4, MAP2K3, AVPI1, NOX4, IGFBP4, XDH	GADD45G, C5, NPNT, EMC10, ZEB2, FBXW7, RAPGEF1, HMGCR, MAPK8IP1, STK25, TRAF4, FGF9, MAP3K7, ZNF622, CD36, APOE, STK3, BMP4, FGFR4, CDON, CTNNB1, ERBB2, PJA2, GPR37, ADORA1, AR, PLCE1, TRAF6, IGF2.1, GLIPR2
iMyoblast vs S2B	BP	Up	GO:0042330	taxis	410	77	60	7.79354e-10	0.0232777	6.45531e-07	0.500033	TGFB1, EXT1, PTPRJ, SEMA7A, PTPRA, HBEGF, GLI2, GREM1, ITGA2, PLAUR, FGF2, FOXD1, VEGFC, FAM129B, DUSP1, NRP1, RHOG, SEMA4B, MET, SHC3, LRP1, SLC8B1, CYR61, DVL1, EPHA2, EZR, SERPINE1, CXCL12, NTN4, SH3KBP1	CDK5R1, SEMA6A, JAM3, SEMA6B, C5, SEMA3E, DAG1, RIPOR2, LRTM1, PLXNA1, DPYSL5, TUBB2B, RNF165, CXADR, MSTN, ISPD, CHN1, SCRIB, SEMA6C, NCAM1, DYSF, GPC1, EVL, FYN, VAV3, BMP4, MYOT, RPS6KA5, ERBB2, PALLD
iMyoblast vs S2B	BP	Up	GO:0045785	positive regulation of cell adhesion	275	57	31	1.23999e-09	0.484304	9.40029e-07	1	TGFB1, HLA-E, FLNA, DOCK5, PLEKHA2, PTPRJ, SIRPA, GLI2, ETS1, BAD, ITGA2, SMAD7, IL7R, CD44, RIPK2, TFE3, THY1, IQGAP1, CIB1, ADAM9, FN1, PAK1, CCDC80, NRP1, NFKBIZ, ITGA5, PNP, CYR61, ITGA3, TRIOBP	NPNT, DAG1, CD36, CASS4, FAM49B, DYSF, EMILIN2, ICOSLG, FYN, VAV3, ERBB2, ITGA4, MDK, TNFSF13B, ANK3, SOCS1, TRAF6, IGF2.1, SPOCK2, RAG1, EMP2, TNFRSF18, ITGB2, BCL6, IGF1, EPB41L5, COL16A1, VSIR, SAA1, EMID1
iMyoblast vs S2B	BP	Up	GO:1904018	positive regulation of vasculature development	138	37	17	1.24936e-09	0.371057	9.40029e-07	1	ITGB1, ENG, ETS1, FGF2, VEGFC, SPHK1, CIB1, HMGA2, GATA2, NRP1, ITGA5, SERPINB7, SERPINE1, FOXC2, HIF1A, PGF, RRAS, PLK2, CXCL8, AKT3, BMPER, HSPB6, F3, HIPK2, CCBE1, HMOX1, GPER1, MYOCD, RHOJ, VEGFA	VASH2, EMC10, SMAD1, DLL1, BTG1, MDK, RAMP2, RLN2, ADAM12, ITGB2, ITGB8, HSPB1, PDGFD, HDAC9, AQP1, CHI3L1, PDGFB
iMyoblast vs S2B	BP	Down	GO:0003012	muscle system process	329	42	128	0.0161409	2.36744e-40	0.224591	4.80945e-36	G6PD, ASPH, TMOD3, FLNA, DOCK5, SORBS3, TLN1, TWF1, RGS4, SMTN, ITGB5, TPM3, ITGA2, SMAD7, TPM4, ATP2B4, SLC9A1, SPHK1, PAK1, EHD3, PPP1R13L, MAP2K3, KCNMA1, VIM, STC1, HSPB6, HTR7, HMOX1, CAV1, DOCK4	ACTN2, TMEM38A, TNNI2, CASQ2, SMPX, GATM, RYR1, KCNH2, MYOG, MYH3, MYLPF, TCAP, TNNT3, MYBPH, LMOD3, TNNC2, MYL1, MYOM1, TNNC1, MYH2, MEF2C, ACTA1, CHRND, STAC3, MYOZ2, MYH8, TRIM72, TMEM38B, MYH7, NPNT
iMyoblast vs S2B	BP	Down	GO:0006936	muscle contraction	253	34	106	0.0140791	6.04643e-37	0.202275	2.45666e-33	ASPH, TMOD3, FLNA, DOCK5, SORBS3, TLN1, SMTN, ITGB5, TPM3, ITGA2, SMAD7, TPM4, ATP2B4, SLC9A1, SPHK1, EHD3, PPP1R13L, MAP2K3, KCNMA1, VIM, STC1, HSPB6, HTR7, CAV1, DOCK4, GPER1, MYOCD, GJA1, CNN1, OXTR	ACTN2, TMEM38A, TNNI2, CASQ2, SMPX, RYR1, KCNH2, MYH3, MYLPF, TCAP, TNNT3, MYBPH, LMOD3, TNNC2, MYL1, MYOM1, TNNC1, MYH2, ACTA1, CHRND, STAC3, MYH8, TRIM72, TMEM38B, MYH7, NPNT, SORBS1, NEB, BIN1, HRC
iMyoblast vs S2B	BP	Down	GO:0070252	actin-mediated cell contraction	87	12	53	0.086306	1.68345e-29	0.575609	5.69987e-26	FLNA, TPM3, TPM4, SLC9A1, VIM, STC1, CAV1, GJA1, DLG1, PDE4B, FRMD6, DSG2	ACTN2, TNNI2, KCNH2, MYH3, TCAP, TNNT3, TNNC2, MYL1, TNNC1, MYH2, ACTA1, MYH8, MYH7, NEB, BIN1, CACNA2D1, KCNE5, DES, CAV3, MYL4, TTN, ATP2A1, TMOD1, TNNI1, AKAP9, CAMK2D, MYL6B, TNNT2, ACTC1, MYBPC1
iMyoblast vs S2B	BP	Down	GO:0042692	muscle cell differentiation	294	39	104	0.01097	7.21276e-29	0.169276	2.09325e-25	TGFB1, G6PD, TMOD3, ITGB1, ENG, CDH2, RGS4, GREM1, MMP14, SLC9A1, FAM129B, PAK1, SDC1, SOX9, MYH9, NOX4, CD9, NRG1, WDR1, PTBP1, ACTG1, KRT8, DKK1, ADGRB3, TBX2, TBX3, CSRP1, MAPK12, GPER1, CAPN2	ACTN2, SMYD1, CASQ2, RYR1, RBPJ, MYOG, MYH3, TCAP, MYMX, TNNT3, LMOD3, MYOM1, MEF2C, ACTA1, STAC3, MYOZ2, TRIM72, NPNT, MAMSTR, NEB, BIN1, AKAP6, RIPOR2, KLHL40, ALPK3, DLL1, CXADR, CAV3, SYNPO2L, CFL2
iMyoblast vs S2B	BP	Down	GO:0006941	striated muscle contraction	125	12	64	0.482429	1.22866e-28	1	3.12002e-25	FLNA, SMAD7, SLC9A1, EHD3, PPP1R13L, MAP2K3, STC1, CAV1, GJA1, DLG1, PDE4B, DSG2	TMEM38A, TNNI2, CASQ2, SMPX, KCNH2, MYH3, TCAP, TNNT3, MYBPH, LMOD3, TNNC2, MYL1, TNNC1, CHRND, STAC3, MYH8, TMEM38B, MYH7, BIN1, HRC, CACNA2D1, CALM1, KCNE5, CAV3, MYL4, HOMER1, TTN, ATP2A1, TNNI1, AKAP9
iMyoblast vs S2B	BP	Down	GO:0007517	muscle organ development	322	35	110	0.176182	1.72807e-28	0.799582	3.90064e-25	TGFB1, G6PD, ENG, NR1D2, RGS4, SMTN, HBEGF, GREM1, SMAD7, FGF2, FAM129B, PAK1, ID3, MAFF, FOXC2, NRG1, HLX, BCL9L, DKK1, COPRS, TBX2, CAV1, MAPK12, MYOCD, NR2F2, GJA1, EPHB1, LOX, DNER, HEG1	CAVIN4, SMYD1, RYR1, RBPJ, ERBB3, MYOG, MYH3, MYLPF, TCAP, MYMX, LMOD3, MYOM1, TNNC1, SRPK3, MEF2C, ACTA1, CHRND, STAC3, MYOZ2, SOX8, TRIM72, MYH7, UNC45B, NEB, AKAP6, RIPOR2, KLHL40, CHD7, TCF12, DLL1
iMyoblast vs S2B	BP	Down	GO:0051146	striated muscle cell differentiation	223	32	87	0.00630312	6.31201e-28	0.120989	1.28228e-24	TGFB1, G6PD, TMOD3, ITGB1, CDH2, RGS4, GREM1, MMP14, SLC9A1, FAM129B, PAK1, SDC1, MYH9, NOX4, CD9, NRG1, WDR1, ACTG1, KRT8, DKK1, ADGRB3, TBX3, CSRP1, CAPN2, MYOCD, VEGFA, LOX, IL4R, UCHL1, DNER	ACTN2, SMYD1, CASQ2, RYR1, RBPJ, MYOG, MYH3, TCAP, MYMX, TNNT3, LMOD3, MYOM1, MEF2C, ACTA1, STAC3, MYOZ2, TRIM72, MAMSTR, NEB, AKAP6, RIPOR2, KLHL40, ALPK3, DLL1, CXADR, CAV3, SYNPO2L, CFL2, OBSCN, HOMER1
iMyoblast vs S2B	BP	Down	GO:0030048	actin filament-based movement	107	19	56	0.00273206	1.69974e-26	0.0692907	2.83319e-23	MYO9B, FLNA, MYO1E, MYO5A, TPM3, TPM4, SLC9A1, MYH9, VIM, MYO6, STC1, WIPF1, MYO19, CAV1, GJA1, DLG1, PDE4B, FRMD6, DSG2	ACTN2, TNNI2, KCNH2, MYH3, TCAP, TNNT3, TNNC2, MYL1, TNNC1, MYH2, ACTA1, MYH8, MYH7, NEB, BIN1, WIPF3, CACNA2D1, KCNE5, DES, CAV3, MYL4, TTN, ATP2A1, TMOD1, TNNI1, AKAP9, CAMK2D, FNBP1L, MYL6B, TNNT2
iMyoblast vs S2B	BP	Down	GO:0055001	muscle cell development	143	17	66	0.150986	1.81302e-26	0.758801	2.83319e-23	G6PD, TMOD3, ITGB1, ENG, RGS4, FAM129B, PAK1, SDC1, WDR1, ACTG1, KRT8, TBX3, CSRP1, VEGFA, LOX, UCHL1, DNER	ACTN2, CASQ2, RYR1, MYOG, MYH3, TCAP, TNNT3, LMOD3, MYOM1, MEF2C, ACTA1, STAC3, MYOZ2, NEB, BIN1, AKAP6, RIPOR2, KLHL40, ALPK3, CXADR, CAV3, SYNPO2L, CFL2, OBSCN, HOMER1, TTN, TMOD1, SYPL2, OBSL1, CHRNB1
iMyoblast vs S2B	BP	Down	GO:0014706	striated muscle tissue development	300	37	101	0.0428527	1.22935e-25	0.406991	1.78387e-22	TGFB1, G6PD, ITGB1, ENG, NR1D2, RGS4, GREM1, SMAD7, FGF2, SLC9A1, FAM129B, PAK1, PPP1R13L, NOX4, MAFF, ID2, FOXC2, NRG1, HLX, BCL9L, DKK1, TBX2, TBX3, CAV1, MYOCD, NR2F2, GJA1, EPHB1, VEGFA, LOX	ACTN2, SMYD1, RYR1, RBPJ, ERBB3, MYOG, MYLPF, TCAP, LMOD3, MYOM1, TNNC1, SRPK3, MEF2C, ACTA1, CHRND, STAC3, MYOZ2, SOX8, MYH7, NEB, AKAP6, RIPOR2, KLHL40, CHD7, SMAD1, ALPK3, DLL1, CXADR, CAV3, CFL2
iMyoblast vs S2B	BP	Down	GO:0060537	muscle tissue development	315	40	102	0.0236716	1.93503e-24	0.283543	2.45688e-21	TGFB1, G6PD, ITGB1, ENG, NR1D2, RGS4, GREM1, SMAD7, FGF2, SLC9A1, FAM129B, PAK1, PPP1R13L, SOX9, NOX4, MAFF, ID2, FOXC2, NRG1, HLX, BCL9L, DKK1, TBX2, TBX3, CSRP1, CAV1, MYOCD, NR2F2, GJA1, EPHB1	ACTN2, SMYD1, RYR1, RBPJ, ERBB3, MYOG, MYLPF, TCAP, LMOD3, MYOM1, TNNC1, SRPK3, MEF2C, ACTA1, CHRND, STAC3, MYOZ2, SOX8, MYH7, NEB, AKAP6, RIPOR2, KLHL40, CHD7, SMAD1, ALPK3, DLL1, CXADR, CAV3, CFL2
iMyoblast vs S2B	BP	Down	GO:0055002	striated muscle cell development	131	16	60	0.131721	4.53666e-24	0.692524	5.42131e-21	G6PD, TMOD3, ITGB1, RGS4, FAM129B, PAK1, SDC1, WDR1, ACTG1, KRT8, TBX3, CSRP1, VEGFA, LOX, UCHL1, DNER	ACTN2, CASQ2, RYR1, MYOG, MYH3, TCAP, TNNT3, LMOD3, MYOM1, MEF2C, ACTA1, STAC3, MYOZ2, NEB, AKAP6, RIPOR2, KLHL40, ALPK3, CXADR, CAV3, SYNPO2L, CFL2, OBSCN, HOMER1, TTN, TMOD1, OBSL1, CHRNB1, LDB3, KLHL41
iMyoblast vs S2B	BP	Down	GO:0030049	muscle filament sliding	33	3	28	0.54127	3.20202e-23	1	3.42363e-20	TPM3, TPM4, VIM	ACTN2, TNNI2, MYH3, TCAP, TNNT3, TNNC2, MYL1, TNNC1, MYH2, ACTA1, MYH8, MYH7, NEB, DES, MYL4, TTN, TMOD1, TNNI1, MYL6B, TNNT2, ACTC1, MYBPC1, MYBPC2, TNNI3, MYL3, TNNT1, DMD, TPM2
iMyoblast vs S2B	BP	Down	GO:0033275	actin-myosin filament sliding	33	3	28	0.54127	3.20202e-23	1	3.42363e-20	TPM3, TPM4, VIM	ACTN2, TNNI2, MYH3, TCAP, TNNT3, TNNC2, MYL1, TNNC1, MYH2, ACTA1, MYH8, MYH7, NEB, DES, MYL4, TTN, TMOD1, TNNI1, MYL6B, TNNT2, ACTC1, MYBPC1, MYBPC2, TNNI3, MYL3, TNNT1, DMD, TPM2
iMyoblast vs S2B	BP	Down	GO:0003015	heart process	177	21	69	0.138453	5.30446e-22	0.718616	5.38801e-19	ASPH, FLNA, RGS4, HBEGF, SMAD7, ATP2B4, SLC9A1, EHD3, PPP1R13L, GNAI2, MAP2K3, NOX4, KCNK6, STC1, TBX2, CACNB3, CAV1, GJA1, DLG1, PDE4B, DSG2	TMEM38A, TNNI2, CASQ2, RYR1, KCNH2, TCAP, TNNT3, MYL1, TNNC1, TMEM38B, MYH7, BIN1, HRC, CACNA2D1, CACNB1, CALM1, KCNE5, DES, CXADR, CAV3, MYL4, TTN, ATP2A1, CACNA1S, AKAP9, CAMK2D, DMPK, TNNT2, ATP2B1, ACTC1
iMyoblast vs S2B	BP	Down	GO:0030239	myofibril assembly	59	6	37	0.434566	1.25703e-21	1	1.21603e-18	TMOD3, ITGB1, WDR1, ACTG1, KRT8, CSRP1	ACTN2, CASQ2, MYH3, TCAP, TNNT3, LMOD3, MYOM1, MEF2C, ACTA1, MYOZ2, NEB, CAV3, SYNPO2L, CFL2, OBSCN, TTN, TMOD1, OBSL1, LDB3, KLHL41, TNNT2, MYOM3, ACTC1, MYBPC1, MYBPC2, CSRP3, NEBL, PRKAR1A, PROX1, CSRP2
iMyoblast vs S2B	BP	Down	GO:0003013	circulatory system process	337	55	101	2.06759e-05	2.38624e-21	0.00207936	2.20348e-18	TGFB1, ASPH, FLNA, DOCK5, GCLM, PTPRJ, RGS4, PLOD3, HBEGF, SMAD7, ATP2B4, VEGFC, SLC9A1, FLI1, EHD3, PPP1R13L, GNAI2, MAP2K3, NOX4, CXCL12, ID2, FOXC2, KCNMA1, ARHGAP35, PPARD, KCNK6, STC1, EGFR, TBX2, CACNB3	TMEM38A, TNNI2, CASQ2, RYR1, KCNH2, TCAP, TNNT3, MYL1, TNNC1, TMEM38B, MYH7, BIN1, HRC, CACNA2D1, CACNB1, PTP4A3, CHD7, CALM1, KCNE5, DES, DLL1, CXADR, CAV3, MYL4, HMGCR, TTN, ATP2A1, CACNA1S, GRIP2, AKAP9
iMyoblast vs S2B	BP	Down	GO:0060047	heart contraction	169	19	66	0.218143	4.5058e-21	0.881027	3.9798e-18	ASPH, FLNA, RGS4, HBEGF, SMAD7, ATP2B4, SLC9A1, EHD3, PPP1R13L, MAP2K3, KCNK6, STC1, TBX2, CACNB3, CAV1, GJA1, DLG1, PDE4B, DSG2	TMEM38A, TNNI2, CASQ2, RYR1, KCNH2, TCAP, TNNT3, MYL1, TNNC1, TMEM38B, MYH7, BIN1, HRC, CACNA2D1, CACNB1, CALM1, KCNE5, DES, CXADR, CAV3, MYL4, TTN, ATP2A1, CACNA1S, AKAP9, CAMK2D, DMPK, TNNT2, ATP2B1, ACTC1
iMyoblast vs S2B	BP	Down	GO:0008015	blood circulation	328	51	98	0.000153684	1.38178e-20	0.00899738	1.16962e-17	TGFB1, ASPH, FLNA, DOCK5, GCLM, PTPRJ, RGS4, PLOD3, HBEGF, SMAD7, ATP2B4, VEGFC, SLC9A1, FLI1, EHD3, PPP1R13L, MAP2K3, CXCL12, ID2, FOXC2, KCNMA1, ARHGAP35, PPARD, KCNK6, STC1, EGFR, TBX2, CACNB3, HTR7, HMOX1	TMEM38A, TNNI2, CASQ2, RYR1, KCNH2, TCAP, TNNT3, MYL1, TNNC1, TMEM38B, MYH7, BIN1, HRC, CACNA2D1, CACNB1, PTP4A3, CHD7, CALM1, KCNE5, DES, DLL1, CXADR, CAV3, MYL4, HMGCR, TTN, ATP2A1, CACNA1S, GRIP2, AKAP9
iMyoblast vs S2B	BP	Down	GO:0060048	cardiac muscle contraction	96	12	46	0.172138	2.13416e-19	0.79802	1.66752e-16	FLNA, SMAD7, SLC9A1, EHD3, PPP1R13L, MAP2K3, STC1, CAV1, GJA1, DLG1, PDE4B, DSG2	TMEM38A, TNNI2, CASQ2, KCNH2, TCAP, TNNT3, MYL1, TNNC1, TMEM38B, MYH7, BIN1, HRC, CACNA2D1, CALM1, KCNE5, CAV3, MYL4, TTN, ATP2A1, AKAP9, CAMK2D, TNNT2, ACTC1, RGS2, CSRP3, ANK2, PKP2, ATP2A2, TNNI3, MYL3
iMyoblast vs S2B	CC	Up	GO:0030055	cell-substrate junction	390	84	41	8.53445e-16	0.51796	7.7448e-12	1	ARPC5, ITGB1, FLNA, ENG, SORBS3, ARHGAP22, MSN, TLN1, CPNE3, AHNAK, TWF1, SNTB2, CDH2, TSPAN4, ITGB5, SCARF2, ARPC1B, ITGA2, TPM4, ZYX, ACTN1, PLAUR, MMP14, CD44, PROCR, SLC9A1, THY1, TGFB1I1, CAP1, IQGAP1	XIRP1, ACTN2, SMPX, SORBS1, DAG1, RPS10, CAV3, ARHGEF2, SNTB1, SYNPO2, AIF1L, SORBS2, ATAT1, CASS4, TSPAN9, ACTC1, EVL, ITGB6, CTNNB1, ARHGAP26, ANXA6, XIRP2, ITGA4, PALLD, CSRP2, FLRT2, SVIL, DMD, ITGB2, ITGB8
iMyoblast vs S2B	CC	Up	GO:0005925	focal adhesion	385	83	39	1.14371e-15	0.614188	7.7448e-12	1	ARPC5, ITGB1, FLNA, ENG, SORBS3, ARHGAP22, MSN, TLN1, CPNE3, AHNAK, TWF1, SNTB2, CDH2, TSPAN4, ITGB5, SCARF2, ARPC1B, ITGA2, TPM4, ZYX, ACTN1, PLAUR, MMP14, CD44, PROCR, SLC9A1, THY1, TGFB1I1, CAP1, IQGAP1	XIRP1, ACTN2, SORBS1, DAG1, RPS10, CAV3, ARHGEF2, SNTB1, SYNPO2, AIF1L, SORBS2, ATAT1, CASS4, TSPAN9, ACTC1, EVL, ITGB6, CTNNB1, ARHGAP26, ANXA6, XIRP2, ITGA4, PALLD, CSRP2, FLRT2, SVIL, ITGB2, ITGB8, HSPB1, MME
iMyoblast vs S2B	CC	Up	GO:0009986	cell surface	444	90	69	1.05864e-13	0.00233199	3.58439e-10	0.113881	TGFB1, HLA-E, ITGB1, ENG, CLSTN1, MSN, TLN1, ULBP2, PTPRJ, SEMA7A, CDH2, SIRPA, ITGB5, HBEGF, SLC7A11, CLMP, ADAM15, TNFRSF10D, ITGA2, IL7R, PLAUR, CD44, PROCR, SLC9A1, THY1, ADAM9, AXL, NRP1, ITGA5, MET	KCNH2, DAG1, FOLR1, CAV3, CLSTN2, ACHE, RTN4R, ADGRA3, TSPAN33, HJV, CD36, LDLR, VAMP5, BCAM, NCAM1, CDH15, GPC1, ICOSLG, ITGB6, CDH7, FZD9, ITGA4, ADAMTS9, SLC1A3, CHRNA1, GPC3, RAMP1, WNT2, GPC4, SORT1
iMyoblast vs S2B	CC	Up	GO:0005911	cell-cell junction	302	64	60	9.92744e-11	7.01887e-06	1.06145e-07	0.000853822	ITGB1, SV2A, COL13A1, FLNA, MYO1E, AHNAK, TWF1, PTPRJ, CDH2, CD2AP, CLMP, ADAM15, FRMD4A, ACTN1, TCHP, CDC42BPB, ESAM, SLC9A1, FAM129B, IQGAP1, PAK1, ITGA5, YWHAH, EPHA2, NF2, SH3KBP1, ARHGAP17, WDR1, KAZN, KRT8	JAM3, CLDN5, SORBS1, AKAP6, AQP3, DES, DLL1, CXADR, CAV3, ARHGEF2, SIRT2, TRAF4, MAPK15, OBSL1, SCRIB, CADM4, VAMP5, CLDN10, SHROOM3, SGCA, TMEM47, ANK2, PKP2, ATP2A2, NECTIN3, USP53, FRMD4B, FGFR4, CTNNB1, PPL
iMyoblast vs S2B	CC	Up	GO:0031252	cell leading edge	332	64	47	3.20991e-09	0.0489046	1.91792e-06	0.767771	KITLG, ARPC5, ITGB1, AAK1, TLN1, SH3RF1, TWF1, PTPRJ, CDH2, DIAPH1, MYO5A, CD2AP, ACTN1, TWF2, CD44, CDC42BPB, SLC9A1, THY1, IQGAP1, CIB1, DLC1, PAK1, WASF3, ITGA5, MYH9, EPHA2, EZR, NF2, APPL2, WLS	ANK1, COBL, ACTA1, RINL, DAG1, PPP1R9A, RIPOR2, ARHGEF2, AIF1L, MACF1, MTSS1, RASGRP2, MTSS1L, KLHL41, SCRIB, CADM4, PDLIM4, SORBS2, ATP2B1, ACTC1, SHISA9, DYSF, FRMD4B, EVL, ABLIM3, SH2B2, CTNNB1, PALLD, ABLIM1, SRGAP2
iMyoblast vs S2B	CC	Up	GO:0005884	actin filament	90	27	23	1.17385e-08	8.05384e-05	6.44508e-06	0.00681724	MYO9B, FLNA, TWF1, MYO5A, CD2AP, SMTN, GNG12, TPM3, TPM4, ACTN1, TWF2, PLS3, PDLIM2, COTL1, IQGAP1, PAWR, PAK1, EZR, HCLS1, WDR1, ACTG1, MYO6, WIPF1, CORO1A, LCP1, SHROOM4, TEK	ACTN2, COBL, ACTA1, WIPF3, PDLIM3, AIF1L, TMOD1, LDB3, PDLIM4, ACTC1, ARHGAP6, MYO18B, FYN, SH2B2, PALLD, SPTBN5, RCSD1, AKAP13, GAS7, LMOD1, DUSP22, TPM2, PDLIM1
iMyoblast vs S2B	CC	Up	GO:0098552	side of membrane	284	55	40	2.70216e-08	0.0643788	1.23134e-05	0.895178	G6PD, HLA-E, ITGB1, ENG, RASA3, ULBP2, SEMA7A, GNGT2, GNG12, BIRC2, CBX6, ITGA2, IL7R, THY1, IQGAP1, ADAM9, TRAF3, ITGA5, SDC1, GNAI2, CD59, TLR4, EZR, TAPBP, ITGA3, CXCL12, CD9, CARMIL2, GNG2, ALCAM	ANK1, STAC3, DAG1, FOLR1, SNX18, RTN4R, ADGRA3, CD36, ATP2B1, LDLR, BCAM, TRAF5, RGS2, NCAM1, ATP2A2, ICOSLG, FYN, ITGB6, SPPL2B, WNT2, GPC4, DTNA, ESYT3, TRAF6, ENPEP, NPTX2, BORCS5, IL11RA, HIP1, ACKR3
iMyoblast vs S2B	CC	Up	GO:0001726	ruffle	150	35	18	1.63662e-07	0.410586	5.80024e-05	1	ITGB1, TLN1, TWF1, PTPRJ, DIAPH1, MYO5A, CD2AP, ACTN1, IQGAP1, CIB1, DLC1, PAK1, ITGA5, MYH9, EPHA2, EZR, NF2, APPL2, CARMIL2, CLIP1, PDE4A, MYO6, NME2, WIPF1, LAYN, MTMR6, TNFRSF12A, LCP1, PODXL, SLC9A3R1	COBL, RINL, ARHGEF2, AIF1L, MACF1, MTSS1, RASGRP2, MTSS1L, KLHL41, FRMD4B, SH2B2, PALLD, ARHGAP45, ASAP3, FGD4, DDX58, SPRY2, EPB41L5
iMyoblast vs S2B	CC	Up	GO:0009897	external side of plasma membrane	145	34	20	1.65599e-07	0.175141	5.80024e-05	1	HLA-E, ITGB1, ENG, ULBP2, SEMA7A, ITGA2, IL7R, THY1, ADAM9, ITGA5, SDC1, CD59, TLR4, ITGA3, CXCL12, CD9, ALCAM, IL13RA1, F3, HLA-B, MICB, CAPN2, ANTXR1, ANPEP, OSMR, SERPINE2, PDCD1LG2, CD274, HLA-A, IL27RA	DAG1, FOLR1, RTN4R, ADGRA3, CD36, LDLR, BCAM, NCAM1, ICOSLG, ITGB6, WNT2, GPC4, ENPEP, IL11RA, ACKR3, ITGB2, EFNA5, FCER1G, CNTFR, ICAM1
iMyoblast vs S2B	CC	Up	GO:0031012	extracellular matrix	310	56	64	1.8294e-07	2.25058e-07	6.19405e-05	3.94142e-05	TGFB1, CTSB, COL13A1, MMP1, TGFBI, SEMA7A, CDH2, PLOD3, MMP2, GREM1, LTBP2, MMP14, LAMB3, TGFB1I1, LTBP3, CTSL, FN1, CCDC80, SERPINB8, CYR61, THSD4, SERPINE1, CXCL12, NTN4, F12, TINAGL1, SCARA3, LTBP4, AGRN, TIMP1	LAD1, NPNT, DAG1, AC007325.4, OLFML2A, ACHE, FGF9, LRRN1, ADAMTS5, APOE, BCAM, CRELD1, F13A1, NCAM1, GPC1, LRIG1, COL19A1, ADAMTSL4, EMILIN2, CDON, TRIL, ANXA6, FRAS1, ADAMTS9, MDK, COL2A1, GPC3, MMP15, WNT2, GPC4
iMyoblast vs S2B	CC	Up	GO:0015629	actin cytoskeleton	415	69	100	2.045e-07	7.60003e-15	6.81051e-05	4.06302e-12	TMOD3, MYO9B, ARPC5, FLNA, MYO1E, AHNAK, TWF1, RFLNB, CDH2, MYO5A, CD2AP, SMTN, GNG12, TPM3, ARPC1B, TPM4, ZYX, ACTN1, TWF2, CDC42BPB, PLS3, PDLIM2, CAP1, COTL1, IQGAP1, DLC1, PAWR, PAK1, MLPH, MYH9	XIRP1, ACTN2, TNNI2, MYH3, MYLPF, TNNT3, LMOD3, COBL, TNNC2, MYL1, MYOM1, TNNC1, MYH2, ACTA1, DAAM1, MYOZ2, MYH8, MYH7, LAD1, RINL, CLDN5, SORBS1, NEB, BIN1, WIPF3, FILIP1, PPP1R9A, PVALB, SYNPO2L, CFL2
iMyoblast vs S2B	CC	Up	GO:0043235	receptor complex	232	47	50	2.90352e-07	7.18114e-06	8.54855e-05	0.000868362	ITGB1, ENG, PTPRA, ITGB5, BIRC2, ITGA2, CD44, GPRC5A, CAPRIN2, AXL, TRAF3, NRP1, ITGA5, MET, LRP1, TRADD, TLR4, EPHA2, ABHD12, ITGA3, RFFL, ALCAM, IL13RA1, GABBR1, EGFR, IRAK1, PTPRB, PLXNA4, GABRE, OSMR	TM7SF2, ERBB3, CHRND, NPNT, SORBS1, PLXNA1, CHRNB1, HJV, SCRIB, CD36, ACVR2B, LDLR, TRAF5, SHISA9, DLG2, FGFR4, ITGB6, TRIL, ERBB2, ITGA4, DDR1, MUSK, CHRNA1, RAMP1, GPR37, ITGA7, LRP5, RAMP2, TRAF6, LOXL4
iMyoblast vs S2B	CC	Up	GO:0045121	membrane raft	226	44	35	6.70473e-07	0.0227757	0.000162151	0.495383	ITGB1, AHNAK, CAVIN1, CDH2, BIRC2, ATP2B4, SLC9A1, THY1, IQGAP1, DLC1, STOM, GNAI2, TRADD, EZR, SPRED1, KCNMA1, PRKAR2B, BCL10, CAVIN3, MALL, STAT6, CD55, EGFR, FAS, HMOX1, CAV1, KIRREL1, PODXL, CAPN2, SLC9A3R1	CAVIN4, GPM6B, SORBS1, DAG1, AKAP6, DLL1, CXADR, CAV3, RTN4R, CD36, ATP2B1, TUBA1A, SGCA, CDH15, GPC1, ANK2, PRKAR1A, FYN, CTNNB1, EDNRB, BVES, ATP1A1, DMD, ADCY2, TNFRSF1B, ATP1A2, EMP2, ITGB2, MME, CAVIN2
iMyoblast vs S2B	CC	Up	GO:0098857	membrane microdomain	227	44	36	7.58771e-07	0.0150508	0.000175164	0.384114	ITGB1, AHNAK, CAVIN1, CDH2, BIRC2, ATP2B4, SLC9A1, THY1, IQGAP1, DLC1, STOM, GNAI2, TRADD, EZR, SPRED1, KCNMA1, PRKAR2B, BCL10, CAVIN3, MALL, STAT6, CD55, EGFR, FAS, HMOX1, CAV1, KIRREL1, PODXL, CAPN2, SLC9A3R1	CAVIN4, GPM6B, SORBS1, DAG1, AKAP6, DLL1, CXADR, CAV3, RTN4R, CD36, ATP2B1, TUBA1A, SGCA, DYSF, CDH15, GPC1, ANK2, PRKAR1A, FYN, CTNNB1, EDNRB, BVES, ATP1A1, DMD, ADCY2, TNFRSF1B, ATP1A2, EMP2, ITGB2, MME
iMyoblast vs S2B	CC	Up	GO:0062023	collagen-containing extracellular matrix	254	47	49	1.03492e-06	4.75919e-05	0.000216216	0.00435508	TGFB1, CTSB, COL13A1, TGFBI, SEMA7A, CDH2, PLOD3, MMP2, GREM1, LTBP2, LAMB3, TGFB1I1, LTBP3, CTSL, FN1, CCDC80, SERPINB8, CYR61, THSD4, SERPINE1, CXCL12, NTN4, F12, TINAGL1, SCARA3, LTBP4, AGRN, TIMP1, TIMP2, LOXL2	LAD1, NPNT, DAG1, ACHE, FGF9, ADAMTS5, APOE, BCAM, CRELD1, F13A1, NCAM1, GPC1, COL19A1, ADAMTSL4, EMILIN2, CDON, ANXA6, FRAS1, ADAMTS9, MDK, COL2A1, GPC3, WNT2, GPC4, SDC2, COL25A1, A2M, SERPINF1, LAMA5, LAMA1
iMyoblast vs S2B	CC	Up	GO:0031253	cell projection membrane	219	43	28	1.61957e-06	0.274313	0.000296411	1	ITGB1, ATP8B1, MSN, TLN1, TWF1, PTPRJ, DIAPH1, SLC7A11, PLAUR, CD44, THY1, CIB1, DLC1, PAK1, EHD3, ITGA5, EPHA2, EZR, GPR161, ITGA3, NF2, APPL2, WLS, PIEZO1, PDE4A, MYO6, IQCE, SLC26A2, MTMR6, KIRREL1	ANK1, FOLR1, RIPOR2, ARHGEF2, AIF1L, MACF1, RASGRP2, MTSS1L, CD36, ATP2B1, SHISA9, CTNNB1, FZD9, ADORA1, BVES, ARHGAP45, DMD, GABARAPL1, PTH1R, ADGRV1, EHD1, AQP1, EPB41L3, DDX58, SPRY2, EPB41L5, GRIA1, CYBRD1
iMyoblast vs S2B	CC	Up	GO:0098797	plasma membrane protein complex	322	56	69	1.77982e-06	4.12954e-08	0.000319973	8.64861e-06	HLA-E, ITGB1, COL13A1, KCNG1, SNTB2, CDH2, GNGT2, ITGB5, GNG12, BIRC2, AP2S1, ITGA2, SMAD7, TRAF3, ITGA5, SCN9A, GNAI2, LRP1, TRADD, ABHD12, ITGA3, NOX4, KCNMA1, GNG2, KRT8, ALCAM, KCNK6, IL13RA1, GABBR1, SHC1	RYR1, KCNH2, C5, CHRND, STAC3, NPNT, SORBS1, DAG1, CACNA2D1, CACNB1, KCNF1, KCNE5, CAV3, SNTB1, KCNJ6, CACNA1S, AKAP9, CHRNB1, HJV, SCRIB, ACVR2B, TRAF5, SGCA, SHISA9, CDH15, DLG2, CACNA1H, ABCC9, ABCD4, ITGB6
iMyoblast vs S2B	CC	Up	GO:0031256	leading edge membrane	124	29	18	1.80378e-06	0.149344	0.000321437	1	ITGB1, TLN1, TWF1, PTPRJ, DIAPH1, CD44, THY1, CIB1, DLC1, PAK1, ITGA5, EPHA2, EZR, NF2, APPL2, WLS, PIEZO1, PDE4A, MYO6, MTMR6, LCP1, GPER1, ANTXR1, GABRE, WWC1, PLEK2, JCAD, TIAM1, KCNC4	ANK1, RIPOR2, ARHGEF2, AIF1L, MACF1, RASGRP2, MTSS1L, ATP2B1, SHISA9, ADORA1, ARHGAP45, GABARAPL1, ADGRV1, EPB41L3, DDX58, SPRY2, EPB41L5, GRIA1
iMyoblast vs S2B	CC	Up	GO:0098589	membrane region	235	44	37	1.91835e-06	0.0147799	0.000333088	0.379107	ITGB1, AHNAK, CAVIN1, CDH2, BIRC2, ATP2B4, SLC9A1, THY1, IQGAP1, DLC1, STOM, GNAI2, TRADD, EZR, SPRED1, KCNMA1, PRKAR2B, BCL10, CAVIN3, MALL, STAT6, CD55, EGFR, FAS, HMOX1, CAV1, KIRREL1, PODXL, CAPN2, SLC9A3R1	CAVIN4, GPM6B, SORBS1, DAG1, AKAP6, DLL1, CXADR, CAV3, RTN4R, CD36, ATP2B1, TUBA1A, SGCA, DYSF, CDH15, GPC1, ANK2, PRKAR1A, FYN, CTNNB1, EDNRB, BVES, TMEM190, ATP1A1, DMD, ADCY2, TNFRSF1B, ATP1A2, EMP2, ITGB2
iMyoblast vs S2B	CC	Up	GO:0030139	endocytic vesicle	222	42	19	3.48294e-06	0.910815	0.000540121	1	HLA-E, MYO1E, CD2AP, ITGB5, HBEGF, GOLIM4, AP2S1, ZYX, SPHK1, EHD3, TCIRG1, TAP1, LRP1, STXBP1, GPR161, TAPBP, APPL2, WLS, CD9, SH3KBP1, VIM, RAB31, ACTG1, EPN2, MYO6, TAP2, CDC42EP4, EGFR, HLA-B, CORO1A	RAPGEF1, MTSS1, CAMK2D, CD36, LDLR, APOE, DYSF, CDC42EP2, EVL, PIK3C2B, SRGAP2, CAMK2B, LPAR2, HIP1, RAB5B, CAMK2A, CACNG4, GRIA1, SAA1
iMyoblast vs S2B	CC	Down	GO:0043292	contractile fiber	191	21	93	0.181176	5.39471e-40	0.801449	5.47968e-36	TMOD3, FLNA, AHNAK, TWF1, MMP2, TPM3, TPM4, ATP2B4, ACTN1, TWF2, PDLIM2, PAK1, AHNAK2, ACTG1, KRT8, SQSTM1, CSRP1, GJA1, SLC2A1, FHL2, PDE4B	ACTN2, CAVIN4, TNNI2, CASQ2, SMPX, CDK5R1, RYR1, MYH3, ANK1, MYLPF, TCAP, TNNT3, LMOD3, TNNC2, MYL1, MYOM1, TNNC1, LRRC39, MYH2, ACTA1, MYOZ2, MYH8, MYH7, NPNT, MYH7B, DAG1, NEB, BIN1, HRC, KLHL40
iMyoblast vs S2B	CC	Down	GO:0030017	sarcomere	166	16	84	0.411219	1.04642e-37	1	7.08601e-34	TMOD3, FLNA, MMP2, TPM3, TPM4, ATP2B4, ACTN1, PDLIM2, PAK1, AHNAK2, KRT8, SQSTM1, CSRP1, SLC2A1, FHL2, PDE4B	ACTN2, CAVIN4, TNNI2, CASQ2, SMPX, RYR1, MYH3, ANK1, TCAP, TNNT3, LMOD3, TNNC2, MYL1, MYOM1, TNNC1, LRRC39, MYH2, ACTA1, MYOZ2, MYH8, MYH7, NEB, BIN1, HRC, KLHL40, CALM1, DES, CAV3, SYNPO2L, CFL2
iMyoblast vs S2B	CC	Down	GO:0030016	myofibril	183	20	88	0.193915	2.15837e-37	0.821559	1.09618e-33	TMOD3, FLNA, AHNAK, TWF1, MMP2, TPM3, TPM4, ATP2B4, ACTN1, TWF2, PDLIM2, PAK1, AHNAK2, ACTG1, KRT8, SQSTM1, CSRP1, SLC2A1, FHL2, PDE4B	ACTN2, CAVIN4, TNNI2, CASQ2, SMPX, RYR1, MYH3, ANK1, TCAP, TNNT3, LMOD3, TNNC2, MYL1, MYOM1, TNNC1, LRRC39, MYH2, ACTA1, MYOZ2, MYH8, MYH7, MYH7B, DAG1, NEB, BIN1, HRC, KLHL40, CALM1, DES, CAV3
iMyoblast vs S2B	CC	Down	GO:0031674	I band	116	11	59	0.477159	9.74529e-27	1	1.79978e-23	FLNA, ATP2B4, ACTN1, PDLIM2, PAK1, AHNAK2, KRT8, CSRP1, SLC2A1, FHL2, PDE4B	ACTN2, CAVIN4, CASQ2, RYR1, ANK1, TCAP, MYOM1, MYOZ2, MYH7, NEB, BIN1, HRC, KLHL40, DES, CAV3, SYNPO2L, CFL2, PDLIM3, OBSCN, SYNPO2, JPH1, HOMER1, TTN, FBXL22, TRIM54, CACNA1S, ITGB1BP2, OBSL1, LDB3, PDLIM4
iMyoblast vs S2B	CC	Down	GO:0030018	Z disc	106	11	54	0.357892	1.21896e-24	1	1.65088e-21	FLNA, ATP2B4, ACTN1, PDLIM2, PAK1, AHNAK2, KRT8, CSRP1, SLC2A1, FHL2, PDE4B	ACTN2, CAVIN4, CASQ2, RYR1, ANK1, TCAP, MYOM1, MYOZ2, MYH7, NEB, BIN1, HRC, DES, CAV3, SYNPO2L, CFL2, PDLIM3, OBSCN, SYNPO2, JPH1, HOMER1, TTN, FBXL22, TRIM54, ITGB1BP2, OBSL1, LDB3, PDLIM4, SORBS2, MYOM3
iMyoblast vs S2B	CC	Down	GO:0015629	actin cytoskeleton	415	69	100	2.045e-07	7.60003e-15	6.81051e-05	4.06302e-12	TMOD3, MYO9B, ARPC5, FLNA, MYO1E, AHNAK, TWF1, RFLNB, CDH2, MYO5A, CD2AP, SMTN, GNG12, TPM3, ARPC1B, TPM4, ZYX, ACTN1, TWF2, CDC42BPB, PLS3, PDLIM2, CAP1, COTL1, IQGAP1, DLC1, PAWR, PAK1, MLPH, MYH9	XIRP1, ACTN2, TNNI2, MYH3, MYLPF, TNNT3, LMOD3, COBL, TNNC2, MYL1, MYOM1, TNNC1, MYH2, ACTA1, DAAM1, MYOZ2, MYH8, MYH7, LAD1, RINL, CLDN5, SORBS1, NEB, BIN1, WIPF3, FILIP1, PPP1R9A, PVALB, SYNPO2L, CFL2
iMyoblast vs S2B	CC	Down	GO:0005865	striated muscle thin filament	26	3	19	0.407103	1.13768e-13	1	5.37486e-11	TMOD3, TPM3, TPM4	TNNI2, TNNT3, LMOD3, TNNC2, MYOM1, TNNC1, ACTA1, TTN, TMOD1, TNNI1, OBSL1, TNNT2, MYOM3, MYBPC1, MYBPC2, TNNI3, TNNT1, LMOD1, TPM2
iMyoblast vs S2B	CC	Down	GO:0042383	sarcolemma	102	14	40	0.0781873	1.23189e-13	0.568297	5.5613e-11	ITGB1, AHNAK, CDH2, ATP2B4, SLC9A1, CIB1, SLC8B1, EZR, AHNAK2, KRT8, CACNB3, CAV1, SLC2A1, DLG1	CAVIN4, RYR1, ANK1, STAC3, TRIM72, DAG1, BIN1, CACNA2D1, AKAP6, CACNB1, DES, CAV3, OBSCN, SNTB1, CACNA1S, CAMK2D, SGCA, DYSF, ANK2, ABCC9, MYOT, MLIP, DTNA, RTN2, BVES, ANK3, ATP1A1, DMD, ATP1A2, SSPN
iMyoblast vs S2B	CC	Down	GO:0036379	myofilament	27	3	19	0.437675	4.05606e-13	1	1.75317e-10	TMOD3, TPM3, TPM4	TNNI2, TNNT3, LMOD3, TNNC2, MYOM1, TNNC1, ACTA1, TTN, TMOD1, TNNI1, OBSL1, TNNT2, MYOM3, MYBPC1, MYBPC2, TNNI3, TNNT1, LMOD1, TPM2
iMyoblast vs S2B	CC	Down	GO:0031672	A band	30	0	19	1	1.70097e-11	1	6.28276e-09		SMPX, ANK1, LMOD3, MYOM1, LRRC39, KLHL40, MYL4, OBSCN, TTN, OBSL1, CMYA5, KLHL41, MYOM3, MYBPC1, MYBPC2, ANK2, MYL3, PPP1R12B, CRYAB
iMyoblast vs S2B	CC	Down	GO:0016529	sarcoplasmic reticulum	54	2	25	0.966963	1.25273e-10	1	4.31343e-08	ASPH, XDH	TMEM38A, CASQ2, SRL, RYR1, MRLN, ANK1, TMEM38B, HRC, CACNA2D1, AKAP6, JPH1, ATP2A1, CAMK2D, DMPK, CMYA5, KLHL41, ATP2A2, SLN, JPH2, MANF, RTN2, ANK3, CAMK2B, SGCD, AGL
iMyoblast vs S2B	CC	Down	GO:0016528	sarcoplasm	63	2	27	0.983273	1.52081e-10	1	5.1492e-08	ASPH, XDH	TMEM38A, CASQ2, SRL, RYR1, MRLN, ANK1, MEF2C, TMEM38B, HRC, CACNA2D1, AKAP6, FABP3, JPH1, ATP2A1, CAMK2D, DMPK, CMYA5, KLHL41, ATP2A2, SLN, JPH2, MANF, RTN2, ANK3, CAMK2B, SGCD, AGL
iMyoblast vs S2B	CC	Down	GO:0031430	M band	22	0	15	1	5.55253e-10	1	1.68358e-07		SMPX, ANK1, LMOD3, MYOM1, LRRC39, OBSCN, TTN, OBSL1, CMYA5, KLHL41, MYOM3, MYBPC1, MYBPC2, ANK2, CRYAB
iMyoblast vs S2B	CC	Down	GO:1902495	transmembrane transporter complex	143	21	42	0.0289172	6.16782e-09	0.319466	1.58607e-06	KCNG1, SLC9A1, SCN9A, LRRC8C, ABHD12, KCNMA1, LRRC8A, KCNK6, CACNB3, KCNQ3, GABRE, KCNN4, LRRC8E, DLG3, DLG1, PDE4B, PORCN, CACNA1A, CHRNA5, NLGN1, KCNC4	CASQ2, RYR1, KCNH2, CHRND, STAC3, CACNA2D1, AKAP6, CACNB1, KCNF1, CALM1, KCNE5, ATP2A1, KCNJ6, CACNA1S, AKAP9, CHRNB1, SCRIB, SHISA9, DLG2, SMDT1, HERPUD1, CACNA1H, ABCC9, MCU, ABCD4, SCN3B, CHRNA1, UNC80, ATP1A1, GRIK1
iMyoblast vs S2B	CC	Down	GO:0005861	troponin complex	8	0	8	1	9.45827e-09	1	2.315e-06		TNNI2, TNNT3, TNNC2, TNNC1, TNNI1, TNNT2, TNNI3, TNNT1
iMyoblast vs S2B	CC	Down	GO:1990351	transporter complex	151	21	43	0.0467507	1.02709e-08	0.42423	2.48397e-06	KCNG1, SLC9A1, SCN9A, LRRC8C, ABHD12, KCNMA1, LRRC8A, KCNK6, CACNB3, KCNQ3, GABRE, KCNN4, LRRC8E, DLG3, DLG1, PDE4B, PORCN, CACNA1A, CHRNA5, NLGN1, KCNC4	CASQ2, RYR1, KCNH2, CHRND, STAC3, CACNA2D1, AKAP6, CACNB1, KCNF1, CALM1, KCNE5, TIMM8B, ATP2A1, KCNJ6, CACNA1S, AKAP9, CHRNB1, SCRIB, SHISA9, DLG2, SMDT1, HERPUD1, CACNA1H, ABCC9, MCU, ABCD4, SCN3B, CHRNA1, UNC80, ATP1A1
iMyoblast vs S2B	CC	Down	GO:0005859	muscle myosin complex	10	0	9	1	1.43157e-08	1	3.30482e-06		MYH3, MYLPF, MYL1, MYH2, MYH8, MYH7, MYL6B, MYL3, MYL5
iMyoblast vs S2B	CC	Down	GO:0034702	ion channel complex	134	20	39	0.0283444	2.97453e-08	0.315689	6.42847e-06	KCNG1, SCN9A, LRRC8C, ABHD12, KCNMA1, LRRC8A, KCNK6, CACNB3, KCNQ3, GABRE, KCNN4, LRRC8E, DLG3, DLG1, PDE4B, PORCN, CACNA1A, CHRNA5, NLGN1, KCNC4	CASQ2, RYR1, KCNH2, CHRND, STAC3, CACNA2D1, AKAP6, CACNB1, KCNF1, CALM1, KCNE5, ATP2A1, KCNJ6, CACNA1S, AKAP9, CHRNB1, SCRIB, SHISA9, DLG2, SMDT1, HERPUD1, CACNA1H, ABCC9, MCU, SCN3B, CHRNA1, UNC80, GRIK1, KCNH1, PDE4D
iMyoblast vs S2B	CC	Down	GO:0016460	myosin II complex	13	1	10	0.690957	3.48782e-08	1	7.45842e-06	MYH9	MYH3, MYLPF, MYL1, MYH2, MYH8, MYH7, MYL6B, MYL3, MYL5, LIMCH1
iMyoblast vs S2B	CC	Down	GO:0034703	cation channel complex	99	14	32	0.0877102	3.72907e-08	0.579638	7.89125e-06	KCNG1, SCN9A, ABHD12, KCNMA1, KCNK6, CACNB3, KCNQ3, KCNN4, DLG3, PDE4B, PORCN, CACNA1A, NLGN1, KCNC4	CASQ2, RYR1, KCNH2, STAC3, CACNA2D1, AKAP6, CACNB1, KCNF1, CALM1, KCNE5, ATP2A1, KCNJ6, CACNA1S, AKAP9, SHISA9, DLG2, SMDT1, HERPUD1, CACNA1H, ABCC9, MCU, SCN3B, UNC80, GRIK1, KCNH1, PDE4D, KCNMB4, CACNG4, KCNJ8, KCNJ2
iMyoblast vs S2B	MF	Up	GO:0038023	signaling receptor activity	465	93	79	9.98227e-13	0.000259585	1.84354e-09	0.0187668	ITGB1, ENG, NR1D2, PTPRA, ITGB5, PEAR1, TNFRSF10D, ITGA2, SLC1A5, IL7R, PLAUR, CD44, PROCR, RRBP1, F2RL2, CRIM1, GPR176, SPHK1, GPRC5A, RARG, AXL, NRP1, MET, LRP1, TLR4, EPHA2, GPR161, NR3C1, TSPO, LTBP4	ERBB3, GPR153, PTPRD, CHRND, FOLR1, PLXNA1, LPAR4, RTN4R, ADGRA3, CHRNB1, HJV, RABGAP1, CD36, ACVR2B, BCAM, ADGRL2, IL20RA, FKBP3, NPY, NECTIN3, ABCC9, FGFR4, ITGB6, OPN3, MYOT, FZD9, ERBB2, ITGA4, DDR1, MUSK
iMyoblast vs S2B	MF	Up	GO:0060089	molecular transducer activity	465	93	79	9.98227e-13	0.000259585	1.84354e-09	0.0187668	ITGB1, ENG, NR1D2, PTPRA, ITGB5, PEAR1, TNFRSF10D, ITGA2, SLC1A5, IL7R, PLAUR, CD44, PROCR, RRBP1, F2RL2, CRIM1, GPR176, SPHK1, GPRC5A, RARG, AXL, NRP1, MET, LRP1, TLR4, EPHA2, GPR161, NR3C1, TSPO, LTBP4	ERBB3, GPR153, PTPRD, CHRND, FOLR1, PLXNA1, LPAR4, RTN4R, ADGRA3, CHRNB1, HJV, RABGAP1, CD36, ACVR2B, BCAM, ADGRL2, IL20RA, FKBP3, NPY, NECTIN3, ABCC9, FGFR4, ITGB6, OPN3, MYOT, FZD9, ERBB2, ITGA4, DDR1, MUSK
iMyoblast vs S2B	MF	Up	GO:0003779	actin binding	345	67	92	7.94402e-10	1.66752e-16	6.45531e-07	9.96343e-14	TMOD3, MYO9B, ARPC5, ITGB1, FLNA, MSN, TLN1, MYO1E, TWF1, SNTB2, FXYD5, DIAPH1, MYO5A, SMTN, PXK, TPM3, ARPC1B, TPM4, ACTN1, TWF2, PLS3, PDLIM2, CAP1, COTL1, PAWR, WASF3, MLPH, YWHAH, MYH9, CTNNAL1	XIRP1, ACTN2, TNNI2, CDK5R1, VASH2, MYH3, TNNT3, LMOD3, COBL, TNNC2, CORO7, MYOM1, TNNC1, MYH2, DAAM1, MYOZ2, MYH8, MYH7, MYH7B, SORBS1, DAG1, NEB, BIN1, WIPF3, PPP1R9A, SYNPO2L, CFL2, PDLIM3, MYL4, SNTB1
iMyoblast vs S2B	MF	Up	GO:0050839	cell adhesion molecule binding	434	75	45	2.47083e-09	0.581906	1.61919e-06	1	TMOD3, ITGB1, TAGLN2, FLNA, MSN, TGFBI, TLN1, AHNAK, TWF1, RANGAP1, PTPRJ, SEMA7A, CAST, FXYD5, CDH2, TSPAN4, CD2AP, ITGB5, ADAM15, ITGA2, ACTN1, TWF2, MMP14, FGF2, THY1, FAM129B, GPRC5A, IQGAP1, TRIM25, ADAM9	ACTN2, CDK5R1, JAM3, PTPRD, LAD1, NPNT, PPME1, CXADR, MACF1, ITGB1BP2, FNBP1L, SCRIB, ADAMTS5, CDH15, PKP2, NECTIN3, ITGB6, CDH7, CTNNB1, PPL, ITGA4, ARVCF, ANK3, IGF2.1, LAMA5, PRDX6, IDH1, EMP2, ITGB2, ITGB8
iMyoblast vs S2B	MF	Up	GO:0005178	integrin binding	102	28	19	3.81532e-08	0.0125125	1.66936e-05	0.348555	ITGB1, TGFBI, TLN1, SEMA7A, TSPAN4, ITGB5, ADAM15, ITGA2, ACTN1, MMP14, FGF2, THY1, ADAM9, FN1, ITGA5, CYR61, MYH9, ITGA3, CXCL12, CD9, NRG1, LTBP4, SPP1, TIMP2, ICAM3, EGFR, LCP1, LAMA3	ACTN2, JAM3, NPNT, CXADR, ITGB1BP2, ADAMTS5, ITGB6, IGF2.1, LAMA5, EMP2, ITGB2, ITGB8, PTPN2, TNXB, NISCH, IGF1, COL16A1, GPNMB, ICAM1
iMyoblast vs S2B	MF	Up	GO:0004888	transmembrane signaling receptor activity	345	63	63	1.55228e-07	0.000160562	5.63117e-05	0.0126524	ENG, PTPRA, TNFRSF10D, ITGA2, IL7R, CD44, F2RL2, CRIM1, GPR176, SPHK1, GPRC5A, AXL, NRP1, MET, TLR4, EPHA2, GPR161, LTBP4, IL1RAP, ADGRB3, IL13RA1, IL17RA, GABBR1, F3, EGFR, SSTR1, GPR1, FAS, HTR7, MRC2	ERBB3, GPR153, PTPRD, CHRND, PLXNA1, LPAR4, RTN4R, ADGRA3, CHRNB1, HJV, RABGAP1, ACVR2B, BCAM, ADGRL2, IL20RA, NPY, ABCC9, FGFR4, OPN3, MYOT, FZD9, ERBB2, DDR1, MUSK, P2RX5, CHRNA1, EDNRB, RAMP1, SORT1, GPR37
iMyoblast vs S2B	MF	Up	GO:0005518	collagen binding	52	17	4	1.22856e-06	0.82744	0.000243791	1	ITGB1, CTSB, TGFBI, ITGA2, SMAD7, CD44, ADAM9, CTSL, FN1, PAK1, ITGA3, RELL2, CCBE1, C1QTNF1, MRC2, ADGRG1, ANTXR1	ACHE, DDR1, SPOCK2, PDGFB
iMyoblast vs S2B	MF	Up	GO:0003823	antigen binding	23	11	3	1.53087e-06	0.473729	0.000285318	1	TGFB1, HLA-E, SIRPA, TSPAN4, IL7R, TAP1, TAPBP, HLA-B, HLA-DPB1, HLA-A, HLA-C	ITGA4, JCHAIN, DHCR24
iMyoblast vs S2B	MF	Up	GO:1990782	protein tyrosine kinase binding	70	20	8	3.27716e-06	0.542362	0.000520122	1	CPNE3, SIRPA, SHC3, TRADD, NOX4, PRR7, NRG1, SH2B3, GRB14, SOCS5, SHC1, PTPN14, SQSTM1, TRIM6, DOCK4, GJA1, PITPNM1, TIAM1, GAS6, PITPNM2	MAP3K7, CADM4, CASS4, SH2B2, PTPN2, DUSP22, IRS1, SHC2
iMyoblast vs S2B	MF	Up	GO:0051015	actin filament binding	161	33	48	4.95809e-06	2.98126e-11	0.000704361	1.08151e-08	ARPC5, FLNA, TLN1, MYO1E, TWF1, MYO5A, TPM3, ARPC1B, TPM4, ACTN1, TWF2, PLS3, COTL1, MYH9, CTNNAL1, EZR, TRIOBP, HCLS1, WDR1, MYO6, WIPF1, LASP1, EGFR, CORO1A, ZNF185, LCP1, ANTXR1, SHROOM4, MYO7B, CORO2B	XIRP1, ACTN2, CDK5R1, MYH3, TNNC2, CORO7, MYOM1, TNNC1, MYH2, MYH8, MYH7, MYH7B, NEB, BIN1, WIPF3, PPP1R9A, CFL2, MYL4, AIF1L, TTN, MACF1, TMOD1, OBSL1, SHROOM3, MYOM3, MYBPC1, MYBPC2, NEBL, TNNI3, ABLIM3
iMyoblast vs S2B	MF	Up	GO:0008289	lipid binding	473	71	61	4.0674e-05	0.171619	0.00335891	1	GLTP, ATP8B1, TLN1, CPNE3, MYO1E, PLEKHA2, TWF1, NRGN, PXK, PLEKHN1, BAD, TWF2, SEC14L2, SLC9A1, THY1, SPHK1, IQGAP1, DLC1, CDIPT, AXL, CPNE2, ID3, WDFY1, TLR4, APPL2, CARMIL2, NR3C1, SYT15, PLEKHA3, PRR7	ACTN2, TRIM72, BIN1, FABP3, SNX18, ARHGAP9, LPAR4, OBSCN, RTN4R, RASGRP2, FNBP1L, MTSS1L, CD36, APOE, DOK7, APOC1, PON1, DYSF, PTGDS, STARD4, DBI, PNPLA3, TRIL, ARHGAP26, JPH2, ANXA6, MANF, PIK3C2B, SCAP, MCOLN3
iMyoblast vs S2B	MF	Up	GO:0042605	peptide antigen binding	13	7	1	5.02565e-05	0.780518	0.00399048	1	HLA-E, TAP1, TAPBP, HLA-B, HLA-DPB1, HLA-A, HLA-C	DHCR24
iMyoblast vs S2B	MF	Up	GO:0030246	carbohydrate binding	135	27	18	6.88896e-05	0.236548	0.0049804	1	G6PD, P3H3, ENG, PLOD3, UAP1, CDIPT, PLOD2, GALNT10, TALDO1, GNPNAT1, CRYBG3, GALNT6, TINAGL1, SCARA3, LOXL2, VCAN, CRYBG1, LAYN, EVA1C, MRC2, PTX3, FBXO2, GALNT5, P4HA1, NECTIN1, GALNT3, CNTN1	EGLN3, PYGL, ADGRL2, GPCPD1, GALNT7, PHYH, FUOM, GAA, GYS1, BCAN, NPTX2, ADGRL3, GALNT17, P4HA3, CHI3L1, PPP1R3F, AGL, PLA2R1
iMyoblast vs S2B	MF	Up	GO:0030971	receptor tyrosine kinase binding	54	15	6	7.53555e-05	0.578042	0.0053493	1	CPNE3, SHC3, TRADD, NRG1, SH2B3, GRB14, SOCS5, SHC1, PTPN14, SQSTM1, DOCK4, PITPNM1, TIAM1, GAS6, PITPNM2	MAP3K7, CADM4, SH2B2, PTPN2, IRS1, SHC2
iMyoblast vs S2B	MF	Up	GO:0005096	GTPase activator activity	217	39	29	7.6025e-05	0.239054	0.00536266	1	MYO9B, DOCK5, ARHGAP22, RASA3, RANGAP1, RGS4, RGS10, ARHGDIA, SIPA1L1, GNB5, THY1, IQGAP1, DLC1, NUP50, NRP1, ARHGEF1, ARHGAP17, GIT1, RIN1, ARHGAP35, TBC1D9, ARHGEF12, ADGRB3, ECT2, SIPA1L3, ARHGAP29, RASA2, TBC1D2, DOCK4, TBC1D8B	RINL, ARHGAP9, CHN1, MTSS1L, TBC1D8, RGS2, ARHGAP6, SIPA1L2, CDC42EP2, VAV3, RGS16, ARHGAP26, ARHGAP10, ARHGAP28, ARHGAP39, SRGAP2, STARD13, ARHGAP4, ARHGAP45, AGAP1, ARHGEF6, TBC1D12, ASAP3, TBCK, PREX2, CHN2, ADPRH, RASA4, SGSM3
iMyoblast vs S2B	MF	Up	GO:0005539	glycosaminoglycan binding	130	26	25	7.72852e-05	0.00355118	0.00539536	0.157516	COL13A1, ENG, HBEGF, LTBP2, CD44, FGF2, FN1, CCDC80, NRP1, CYR61, LTBP4, PGF, AGRN, VCAN, LAYN, HAPLN1, EVA1C, ADGRG1, ANG, SFRP1, SERPINE2, VEGFA, NRP2, PTPRF, TGFBR3, LXN	LRTM1, MSTN, RTN4R, FGF9, ADAMTS5, APOE, BMP4, FGFR4, ANXA6, MDK, GREM2, JCHAIN, COL25A1, BCAN, SPOCK2, SOD3, FGFBP3, BGN, NAV2, TNXB, ADA2, SAA1, ADAMTSL5, GPNMB, SULF2
iMyoblast vs S2B	MF	Up	GO:0001618	virus receptor activity	51	14	9	0.000120613	0.104041	0.00765701	0.989052	ITGB1, ITGB5, ITGA2, SLC1A5, AXL, ITGA5, EPHA2, PVR, CD55, EGFR, CLDN1, ANPEP, NECTIN1, TYRO3	DAG1, CXADR, LDLR, NCAM1, ITGB6, SLC20A2, SELPLG, CLDN6, ICAM1
iMyoblast vs S2B	MF	Up	GO:0140272	exogenous protein binding	51	14	9	0.000120613	0.104041	0.00765701	0.989052	ITGB1, ITGB5, ITGA2, SLC1A5, AXL, ITGA5, EPHA2, PVR, CD55, EGFR, CLDN1, ANPEP, NECTIN1, TYRO3	DAG1, CXADR, LDLR, NCAM1, ITGB6, SLC20A2, SELPLG, CLDN6, ICAM1
iMyoblast vs S2B	MF	Up	GO:0050840	extracellular matrix binding	47	13	8	0.000146555	0.126271	0.00873233	0.989052	ITGB1, TGFBI, PLEKHA2, ITGA2, ADAM9, CYR61, ITGA3, NTN4, TINAGL1, AGRN, SPP1, ADGRG1, VEGFA	DAG1, OLFML2A, ACHE, ADAMTS5, BCAM, GPC1, SPOCK2, BGN
iMyoblast vs S2B	MF	Up	GO:0048018	receptor ligand activity	200	35	44	0.000182446	1.04001e-05	0.0102955	0.00118695	KITLG, TGFB1, METRNL, SEMA7A, HBEGF, GREM1, FGF2, VEGFC, CLCF1, SEMA4B, CXCL12, INHBA, NRG1, PGF, TIMP1, SPP1, DKK1, BMP1, STC1, CXCL8, OSGIN1, NBL1, CCL26, CSF1, METRN, CGA, PTHLH, VEGFA, NGF, NMB	IL17B, SEMA6A, SEMA6B, C5, SEMA3E, MSTN, FNDC5, IL34, SCT, FGF9, SEMA6C, JAG2, NPY, CDC42EP2, BMP4, MANF, MDK, TNFSF13B, GREM2, WNT2, FLRT2, WNT9A, FAM3C, IGF2.1, RLN2, C1QTNF4, CCL20, TGFB3, PDGFD, CERS1
iMyoblast vs S2B	MF	Down	GO:0008307	structural constituent of muscle	40	4	29	0.479953	5.34091e-20	1	4.34003e-17	ASPH, SMTN, TPM4, CSRP1	ACTN2, MYLPF, TCAP, MYBPH, MYL1, MYOM1, MYH8, DAG1, NEB, PDLIM3, OBSCN, JPH1, TTN, OBSL1, MYL6B, SORBS2, MYOM3, MYBPC1, MYBPC2, CSRP3, NEBL, MYL3, MYOT, CSRP2, MYL5, DMD, ANKRD2, TPM2, NEXN
iMyoblast vs S2B	MF	Down	GO:0003779	actin binding	345	67	92	7.94402e-10	1.66752e-16	6.45531e-07	9.96343e-14	TMOD3, MYO9B, ARPC5, ITGB1, FLNA, MSN, TLN1, MYO1E, TWF1, SNTB2, FXYD5, DIAPH1, MYO5A, SMTN, PXK, TPM3, ARPC1B, TPM4, ACTN1, TWF2, PLS3, PDLIM2, CAP1, COTL1, PAWR, WASF3, MLPH, YWHAH, MYH9, CTNNAL1	XIRP1, ACTN2, TNNI2, CDK5R1, VASH2, MYH3, TNNT3, LMOD3, COBL, TNNC2, CORO7, MYOM1, TNNC1, MYH2, DAAM1, MYOZ2, MYH8, MYH7, MYH7B, SORBS1, DAG1, NEB, BIN1, WIPF3, PPP1R9A, SYNPO2L, CFL2, PDLIM3, MYL4, SNTB1
iMyoblast vs S2B	MF	Down	GO:0051015	actin filament binding	161	33	48	4.95809e-06	2.98126e-11	0.000704361	1.08151e-08	ARPC5, FLNA, TLN1, MYO1E, TWF1, MYO5A, TPM3, ARPC1B, TPM4, ACTN1, TWF2, PLS3, COTL1, MYH9, CTNNAL1, EZR, TRIOBP, HCLS1, WDR1, MYO6, WIPF1, LASP1, EGFR, CORO1A, ZNF185, LCP1, ANTXR1, SHROOM4, MYO7B, CORO2B	XIRP1, ACTN2, CDK5R1, MYH3, TNNC2, CORO7, MYOM1, TNNC1, MYH2, MYH8, MYH7, MYH7B, NEB, BIN1, WIPF3, PPP1R9A, CFL2, MYL4, AIF1L, TTN, MACF1, TMOD1, OBSL1, SHROOM3, MYOM3, MYBPC1, MYBPC2, NEBL, TNNI3, ABLIM3
iMyoblast vs S2B	MF	Down	GO:0042805	actinin binding	33	3	17	0.595205	1.27734e-08	1	2.98266e-06	PDLIM2, CSRP1, MICALL2	MYOM1, DAG1, PDLIM3, SYNPO2, TTN, OBSL1, LDB3, PDLIM4, MYOM3, MYBPC1, MYBPC2, CSRP3, MYOT, XIRP2, PALLD, CSRP2, PDLIM1
iMyoblast vs S2B	MF	Down	GO:0051393	alpha-actinin binding	27	1	15	0.926443	2.4818e-08	1	5.4802e-06	PDLIM2	MYOM1, DAG1, PDLIM3, SYNPO2, TTN, OBSL1, LDB3, PDLIM4, MYOM3, MYBPC1, MYBPC2, MYOT, XIRP2, PALLD, PDLIM1
iMyoblast vs S2B	MF	Down	GO:0051371	muscle alpha-actinin binding	18	1	12	0.814138	2.63016e-08	1	5.74534e-06	PDLIM2	MYOM1, PDLIM3, SYNPO2, TTN, OBSL1, LDB3, PDLIM4, MYOM3, MYBPC1, MYBPC2, PALLD, PDLIM1
iMyoblast vs S2B	MF	Down	GO:0099094	ligand-gated cation channel activity	39	3	18	0.741399	9.47638e-08	1	1.81616e-05	RASA3, KCNK6, CHRNA5	RYR1, KCNH2, CHRND, JPH1, KCNJ6, CHRNB1, KCNJ12, JPH2, P2RX5, CHRNA1, MCOLN3, P2RX6, GRIK1, AQP1, KCNJ8, CHRNG, KCNJ2, GRIA1
iMyoblast vs S2B	MF	Down	GO:0005261	cation channel activity	138	20	38	0.0342714	1.73346e-07	0.356932	3.14017e-05	RASA3, KCNG1, NALCN, SCN9A, ANO10, NCS1, KCNMA1, PIEZO1, KCNK6, ORAI2, CACNB3, MTMR6, KCNQ3, TMEM63A, KCNN4, CACNA1A, GAS6, TRPV2, CHRNA5, KCNC4	TMEM38A, RYR1, KCNH2, CHRND, TMEM38B, CACNA2D1, CACNB1, KCNF1, KCNE5, ATP5PO, JPH1, KCNJ6, CACNA1S, CHRNB1, CACNA1H, ABCC9, KCNJ12, KCNN3, MCU, JPH2, ANXA6, ASIC4, SCN3B, P2RX5, CHRNA1, MCOLN3, UNC80, P2RX6, GRIK1, KCNH1
iMyoblast vs S2B	MF	Down	GO:0015276	ligand-gated ion channel activity	46	4	19	0.655103	3.1909e-07	1	5.40192e-05	RASA3, KCNK6, GABRE, CHRNA5	RYR1, KCNH2, CHRND, JPH1, KCNJ6, CHRNB1, KCNJ12, JPH2, ANXA6, P2RX5, CHRNA1, MCOLN3, P2RX6, GRIK1, AQP1, KCNJ8, CHRNG, KCNJ2, GRIA1
iMyoblast vs S2B	MF	Down	GO:0022834	ligand-gated channel activity	46	4	19	0.655103	3.1909e-07	1	5.40192e-05	RASA3, KCNK6, GABRE, CHRNA5	RYR1, KCNH2, CHRND, JPH1, KCNJ6, CHRNB1, KCNJ12, JPH2, ANXA6, P2RX5, CHRNA1, MCOLN3, P2RX6, GRIK1, AQP1, KCNJ8, CHRNG, KCNJ2, GRIA1
iMyoblast vs S2B	MF	Down	GO:0044325	ion channel binding	91	12	27	0.112865	8.3229e-07	0.623733	0.00013419	FLNA, PACS1, DIAPH1, ACTN1, CIB1, YWHAH, ID2, TSPO, CAV1, DLG1, PDE4B, RIMS2	ACTN2, ANK1, TCAP, HRC, PPP1R9A, AKAP6, CALM1, KCNE5, CAV3, HOMER1, TCAF1, AKAP9, CAMK2D, PACS2, ANK2, PKP2, HERPUD1, ABCC9, FYN, CTNNB1, SCN3B, ANK3, PDE4D, TCAF2, TRAPPC2, RNF207, FGF13
iMyoblast vs S2B	MF	Down	GO:0005216	ion channel activity	181	24	43	0.0553519	2.40252e-06	0.476066	0.000336601	RASA3, KCNG1, NALCN, SCN9A, ANO10, NCS1, LRRC8C, KCNMA1, PIEZO1, LRRC8A, KCNK6, ORAI2, CACNB3, MTMR6, KCNQ3, TMEM63A, GABRE, KCNN4, LRRC8E, CACNA1A, GAS6, TRPV2, CHRNA5, KCNC4	TMEM38A, CLCN5, RYR1, KCNH2, CHRND, TMEM38B, CACNA2D1, CACNB1, KCNF1, KCNE5, ATP5PO, JPH1, KCNJ6, CACNA1S, CHRNB1, TMC6, CLCN6, CACNA1H, ABCC9, KCNJ12, KCNN3, MCU, JPH2, ANXA6, ASIC4, SCN3B, P2RX5, CHRNA1, MCOLN3, UNC80
iMyoblast vs S2B	MF	Down	GO:0015267	channel activity	194	28	45	0.0146717	2.59325e-06	0.20843	0.000351212	RASA3, KCNG1, NALCN, SCN9A, ANO10, NCS1, LRRC8C, KCNMA1, PIEZO1, STEAP1, LRRC8A, PANX2, KCNK6, ORAI2, BAX, CACNB3, MTMR6, KCNQ3, TMEM63A, GABRE, GJA1, KCNN4, LRRC8E, CACNA1A, GAS6, TRPV2, CHRNA5, KCNC4	TMEM38A, CLCN5, RYR1, KCNH2, CHRND, TMEM38B, CACNA2D1, CACNB1, KCNF1, AQP3, KCNE5, ATP5PO, JPH1, KCNJ6, CACNA1S, CHRNB1, TMC6, CLCN6, CACNA1H, ABCC9, KCNJ12, KCNN3, MCU, JPH2, ANXA6, ASIC4, SCN3B, P2RX5, CHRNA1, MCOLN3
iMyoblast vs S2B	MF	Down	GO:0022803	passive transmembrane transporter activity	194	28	45	0.0146717	2.59325e-06	0.20843	0.000351212	RASA3, KCNG1, NALCN, SCN9A, ANO10, NCS1, LRRC8C, KCNMA1, PIEZO1, STEAP1, LRRC8A, PANX2, KCNK6, ORAI2, BAX, CACNB3, MTMR6, KCNQ3, TMEM63A, GABRE, GJA1, KCNN4, LRRC8E, CACNA1A, GAS6, TRPV2, CHRNA5, KCNC4	TMEM38A, CLCN5, RYR1, KCNH2, CHRND, TMEM38B, CACNA2D1, CACNB1, KCNF1, AQP3, KCNE5, ATP5PO, JPH1, KCNJ6, CACNA1S, CHRNB1, TMC6, CLCN6, CACNA1H, ABCC9, KCNJ12, KCNN3, MCU, JPH2, ANXA6, ASIC4, SCN3B, P2RX5, CHRNA1, MCOLN3
iMyoblast vs S2B	MF	Down	GO:0022836	gated channel activity	129	19	34	0.0366077	2.90059e-06	0.373149	0.000387668	RASA3, KCNG1, NALCN, SCN9A, ANO10, NCS1, KCNMA1, PIEZO1, KCNK6, CACNB3, MTMR6, KCNQ3, TMEM63A, GABRE, KCNN4, CACNA1A, GAS6, CHRNA5, KCNC4	CLCN5, RYR1, KCNH2, CHRND, CACNA2D1, CACNB1, KCNF1, KCNE5, JPH1, KCNJ6, CACNA1S, CHRNB1, TMC6, CLCN6, CACNA1H, KCNJ12, KCNN3, JPH2, ANXA6, SCN3B, P2RX5, CHRNA1, MCOLN3, P2RX6, GRIK1, KCNH1, KCNMB4, AQP1, CACNG4, KCNJ8
iMyoblast vs S2B	MF	Down	GO:0015079	potassium ion transmembrane transporter activity	58	8	20	0.194239	5.19176e-06	0.822033	0.000659191	KCNG1, SLC9A1, KCNMA1, KCNK6, MTMR6, KCNQ3, KCNN4, KCNC4	TMEM38A, KCNH2, TMEM38B, KCNF1, KCNE5, KCNJ6, SLC12A7, ABCC9, KCNJ12, KCNN3, SLC12A5, ATP1A1, GRIK1, KCNH1, ATP1A2, KCNMB4, AQP1, KCNJ8, KCNJ2, SLC12A2
iMyoblast vs S2B	MF	Down	GO:0022890	inorganic cation transmembrane transporter activity	294	31	59	0.264663	8.78689e-06	0.944056	0.00103782	RASA3, KCNG1, NIPAL3, SLC6A6, ATP2B4, SLC9A1, TCIRG1, NALCN, SCN9A, ANO10, SLC8B1, NCS1, SLC39A13, KCNMA1, PIEZO1, SLC20A1, SLC4A8, KCNK6, ORAI2, CACNB3, NIPAL1, MTMR6, KCNQ3, TMEM63A, KCNN4, MFSD2A, CACNA1A, GAS6, TRPV2, CHRNA5	TMEM38A, CLCN5, RYR1, KCNH2, CHRND, SLC15A3, TMEM38B, CACNA2D1, CACNB1, KCNF1, COX7B, KCNE5, ATP5PO, JPH1, ATP2A1, KCNJ6, CACNA1S, CHRNB1, ATP2B1, SLC12A7, COX6A2, ATP2A2, CACNA1H, ABCC9, KCNJ12, KCNN3, SLC45A2, MCU, JPH2, ANXA6
iMyoblast vs S2B	MF	Down	GO:0048018	receptor ligand activity	200	35	44	0.000182446	1.04001e-05	0.0102955	0.00118695	KITLG, TGFB1, METRNL, SEMA7A, HBEGF, GREM1, FGF2, VEGFC, CLCF1, SEMA4B, CXCL12, INHBA, NRG1, PGF, TIMP1, SPP1, DKK1, BMP1, STC1, CXCL8, OSGIN1, NBL1, CCL26, CSF1, METRN, CGA, PTHLH, VEGFA, NGF, NMB	IL17B, SEMA6A, SEMA6B, C5, SEMA3E, MSTN, FNDC5, IL34, SCT, FGF9, SEMA6C, JAG2, NPY, CDC42EP2, BMP4, MANF, MDK, TNFSF13B, GREM2, WNT2, FLRT2, WNT9A, FAM3C, IGF2.1, RLN2, C1QTNF4, CCL20, TGFB3, PDGFD, CERS1
iMyoblast vs S2B	MF	Down	GO:0042166	acetylcholine binding	7	1	6	0.492064	1.27145e-05	1	0.00138869	CHRNA5	CHRND, ACHE, CHRNB1, CHRNA1, CHRM3, CHRNG
iMyoblast vs S2B	MF	Down	GO:0031432	titin binding	10	0	7	1	1.54143e-05	1	0.00165684		ACTN2, TCAP, CALM1, OBSCN, CAMK2D, MYBPC1, ANKRD2
iMyoblast vs S2B	KEGG	Up	hsa05205	Proteoglycans in cancer	174	42	26	3.29263e-08	0.0612544	1.10633e-05	0.571708	TGFB1, ITGB1, FLNA, MSN, ITGB5, HBEGF, MMP2, ITGA2, PLAUR, CD44, FGF2, PLCG2, SLC9A1, IQGAP1, CTSL, FN1, PAK1, ITGA5, MET, SDC1, TLR4, EZR, ARHGEF1, HCLS1, ACTB, ACTG1, HIF1A, ARHGEF12, RRAS, AKT3	ERBB3, ANK1, CAV3, CAMK2D, HSPB2, MRAS, GPC1, ANK2, NUDT16L1, VAV3, CTNNB1, FZD9, ERBB2, GPC3, WNT2, PPP1R12B, WNT9A, SDC2, ANK3, PLCE1, RPS6KB1, IGF2.1, CAMK2B, CAMK2A, IGF1, CASP3
iMyoblast vs S2B	KEGG	Up	hsa04514	Cell adhesion molecules	86	26	17	2.33722e-07	0.0140762	3.92653e-05	0.244392	HLA-E, ITGB1, CDH2, ESAM, SDC1, CD58, CNTNAP1, ALCAM, ICAM3, PVR, NEGR1, VCAN, HLA-B, CLDN1, NLGN2, PTPRM, HLA-DPB1, PDCD1LG2, CD274, HLA-A, NECTIN1, PTPRF, NLGN1, CNTN1, HLA-C, NTNG1	JAM3, CLDN5, CLDN10, NCAM1, CDH15, NECTIN3, ICOSLG, JAM2, ITGA4, SDC2, ITGB2, ITGB8, SELPLG, CLDN6, VSIR, CADM1, ICAM1
iMyoblast vs S2B	KEGG	Up	hsa05200	Pathways in cancer	404	71	49	2.39661e-06	0.315232	0.00025223	1	KITLG, TGFB1, TXNRD1, ITGB1, MMP1, NQO1, GNGT2, NFKBIA, GNG12, MMP2, BIRC2, TPM3, GLI2, ETS1, BAD, ITGA2, IL7R, LAMB3, FGF2, PLCG2, VEGFC, GNB5, RALB, FN1, TRAF3, MET, GNAI2, DVL1, ITGA3, ARHGEF1	EGLN3, SKP2, GADD45G, NCOA1, BCL2L11, CCND3, CALM1, DLL1, LPAR4, TRAF4, RASGRP2, CAMK2D, AXIN2, DAPK1, CASP9, FGF9, TRAF5, RUNX1T1, JAG2, BMP4, FGFR4, CTNNB1, RPS6KA5, FZD9, ERBB2, EDNRB, WNT2, FOXO1, WNT9A, AR
iMyoblast vs S2B	KEGG	Up	hsa04510	Focal adhesion	172	37	26	3.00274e-06	0.0458824	0.00025223	0.484068	ITGB1, FLNA, TLN1, DIAPH1, ITGB5, BIRC2, BAD, ITGA2, ZYX, ACTN1, LAMB3, VEGFC, FN1, PAK1, ITGA5, MET, SHC3, ITGA3, ACTB, ARHGAP35, ACTG1, PGF, SPP1, AKT3, SHC1, EGFR, CCND1, CAV1, CAPN2, PIK3CB	MYLPF, CCND3, CAV3, RAPGEF1, FYN, VAV3, ITGB6, CTNNB1, ERBB2, ITGA4, COL2A1, PPP1R12B, MYL5, ITGA7, LAMA5, LAMA1, COL9A3, CCND2, ITGB8, PDGFD, TNXB, IGF1, LAMA2, MYLK3, PDGFB, SHC2
iMyoblast vs S2B	KEGG	Up	hsa05132	Salmonella infection	190	39	10	8.39845e-06	0.998293	0.000564376	1	ARPC5, FLNA, AHNAK, STX10, NFKBIA, MLKL, BIRC2, ARPC1B, RIPK2, TXN, PAK1, WASF3, RHOG, TRADD, TLR4, MAP2K3, AHNAK2, ACTB, ACTG1, MYO6, RRAS, CXCL8, AKT3, BAX, IKBKG, RILP, TNFRSF10B, MAPK12, KLC2, PODXL	MYLPF, SNX18, MAP3K7, CTNNB1, PIK3C2B, MYL5, TRAF6, ELMO1, RAB5B, CASP3
iMyoblast vs S2B	KEGG	Up	hsa04926	Relaxin signaling pathway	102	25	5	1.99836e-05	0.991551	0.000921888	1	TGFB1, MMP1, GNGT2, NFKBIA, GNG12, MMP2, VEGFC, GNB5, GNAI2, SHC3, GNG2, CREB3L1, ADCY7, AKT3, SHC1, EGFR, MAPK12, PIK3CB, COL4A2, PLCB4, VEGFA, ARRB2, JUN, COL4A1, GNG11	EDNRB, RLN2, ADCY2, GNB3, SHC2
iMyoblast vs S2B	KEGG	Up	hsa04640	Hematopoietic cell lineage	35	13	4	2.00474e-05	0.558789	0.000921888	1	KITLG, ITGA2, IL7R, CD44, ITGA5, CD59, ITGA3, CD9, CD55, CSF1, ANPEP, HLA-DPB1, IL4R	CD36, ITGA4, IL11RA, MME
iMyoblast vs S2B	KEGG	Up	hsa05320	Autoimmune thyroid disease	11	7	0	2.19497e-05	1	0.000921888	1	HLA-E, HLA-B, FAS, CGA, HLA-DPB1, HLA-A, HLA-C
iMyoblast vs S2B	KEGG	Up	hsa04014	Ras signaling pathway	167	35	21	2.78548e-05	0.331962	0.00103991	1	KITLG, RASA3, GNGT2, GNG12, ETS1, BAD, FGF2, PLCG2, VEGFC, GNB5, RALB, PAK1, ETS2, MET, SHC3, EPHA2, RIN1, GNG2, PGF, RRAS, AKT3, SHC1, EGFR, IKBKG, PLD2, RASA2, HTR7, CSF1, PIK3CB, RGL2	CALM1, RASGRP2, FGF9, MRAS, PLA2G16, FGFR4, PLCE1, IGF2.1, PDGFD, NGFR, PLA2G3, RAB5B, EFNA5, GNB3, IGF1, FOXO4, RAPGEF5, NTF3, PDGFB, RASA4, SHC2
iMyoblast vs S2B	KEGG	Up	hsa04015	Rap1 signaling pathway	159	33	23	6.45313e-05	0.130334	0.00216825	0.923981	KITLG, ITGB1, TLN1, ID1, SIPA1L1, FGF2, VEGFC, RALB, MET, GNAI2, EPHA2, MAP2K3, ACTB, ACTG1, PGF, RRAS, ADCY7, AKT3, EGFR, SIPA1L3, MAGI3, DOCK4, MAPK12, CSF1, PIK3CB, APBB1IP, PLCB4, VEGFA, NGF, ADORA2B	CALM1, LPAR4, RAPGEF1, RASGRP2, FGF9, MRAS, SIPA1L2, EVL, VAV3, FGFR4, CTNNB1, PLCE1, ADCY2, LPAR2, ITGB2, PDGFD, NGFR, EFNA5, PARD6B, IGF1, RAPGEF5, PDGFB, P2RY1
iMyoblast vs S2B	KEGG	Up	hsa04810	Regulation of actin cytoskeleton	167	33	21	7.4343e-05	0.268155	0.00227084	1	ARPC5, ITGB1, MSN, DIAPH1, ITGB5, GNG12, ARPC1B, ITGA2, ACTN1, FGF2, SLC9A1, IQGAP1, FN1, PAK1, ITGA5, MYH9, EZR, ITGA3, ARHGEF1, CXCL12, GIT1, ACTB, ARHGAP35, ACTG1, ARHGEF12, RRAS, DIAPH3, EGFR, IQGAP3, PIK3CB	MYLPF, CFL2, LPAR4, FGF9, MRAS, VAV3, FGFR4, ITGB6, ITGA4, PPP1R12B, MYL5, ITGA7, LPAR2, ITGB2, CHRM3, ITGB8, PDGFD, ARHGEF6, IQGAP2, MYLK3, PDGFB
iMyoblast vs S2B	KEGG	Up	hsa05130	Pathogenic Escherichia coli infection	153	31	17	0.000113388	0.537284	0.00317488	1	ARPC5, ITGB1, MYO1E, MYO5A, NFKBIA, ARPC1B, PAK1, WASF3, MYH9, TRADD, TLR4, EZR, ARHGEF1, HCLS1, ACTB, ACTG1, MYO6, ARHGEF12, CXCL8, BAX, WIPF1, IKBKG, TNFRSF10B, FAS, CLDN1, MAPK12, IRAK1, SLC9A3R1, CASP4, JUN	CLDN5, WIPF3, TUBB2B, LPAR4, ARHGEF2, CASP9, MAP3K7, TUBA1A, CLDN10, FYN, TUBB2A, TRAF6, LPAR2, MYO5B, BAIAP2L1, CLDN6, CASP3
iMyoblast vs S2B	KEGG	Up	hsa05332	Graft-versus-host disease	10	6	0	0.000135932	1	0.00336877	1	HLA-E, HLA-B, FAS, HLA-DPB1, HLA-A, HLA-C
iMyoblast vs S2B	KEGG	Up	hsa05330	Allograft rejection	10	6	0	0.000140365	1	0.00336877	1	HLA-E, HLA-B, FAS, HLA-DPB1, HLA-A, HLA-C
iMyoblast vs S2B	KEGG	Up	hsa04933	AGE-RAGE signaling pathway in diabetic complications	88	21	5	0.000174729	0.976779	0.00391394	1	TGFB1, DIAPH1, MMP2, PLCG2, VEGFC, FN1, SERPINE1, NOX4, CXCL8, AKT3, BAX, F3, CCND1, MAPK12, PIK3CB, COL4A2, PLCB4, VEGFA, AGTR1, JUN, COL4A1	FOXO1, PLCE1, TGFB3, CASP3, ICAM1
iMyoblast vs S2B	KEGG	Up	hsa05170	Human immunodeficiency virus 1 infection	164	32	11	0.000205764	0.981175	0.00428073	1	HLA-E, GNGT2, NFKBIA, GNG12, BAD, PLCG2, GNB5, APOBEC3C, PAK1, TAP1, GNAI2, AP1S1, TRADD, TLR4, TAPBP, MAP2K3, GNG2, TAP2, SAMHD1, AKT3, AP1S3, BAX, HLA-B, IKBKG, FAS, MAPK12, IRAK1, PIK3CB, HLA-A, JUN	CALM1, CFL2, CASP9, MAP3K7, TRAF5, RPS6KB1, TRAF6, TNFRSF1B, GNB3, CASP3, AP1M2
iMyoblast vs S2B	KEGG	Up	hsa05163	Human cytomegalovirus infection	171	33	9	0.000216585	0.997942	0.00428073	1	HLA-E, GNGT2, NFKBIA, GNG12, GNB5, TAP1, GNAI2, TRADD, TAPBP, ARHGEF1, CXCL12, GNG2, ARHGEF12, TAP2, CREB3L1, ADCY7, CXCL8, AKT3, BAX, EGFR, CCND1, HLA-B, IKBKG, EIF4EBP1, FAS, MAPK12, PIK3CB, PTGER1, PLCB4, VEGFA	CALM1, CASP9, TRAF5, CTNNB1, RPS6KB1, ADCY2, AKAP13, GNB3, CASP3
iMyoblast vs S2B	KEGG	Up	hsa05032	Morphine addiction	52	15	6	0.000255202	0.585904	0.00476377	1	PDE8A, GNGT2, GNG12, PDE1C, GNB5, GNAI2, GNG2, PDE4A, ADCY7, GABBR1, GABRE, PDE4B, CACNA1A, ARRB2, GNG11	GRK3, KCNJ6, ADORA1, ADCY2, PDE4D, GNB3
iMyoblast vs S2B	KEGG	Up	hsa05222	Small cell lung cancer	84	20	11	0.000284	0.357608	0.00502232	1	ITGB1, NFKBIA, BIRC2, ITGA2, LAMB3, FN1, TRAF3, ITGA3, CDK2, DDB2, AKT3, BAX, CCND1, IKBKG, PIK3CB, COL4A2, BIRC3, CKS2, COL4A1, LAMA3	SKP2, GADD45G, TRAF4, CASP9, TRAF5, FHIT, TRAF6, LAMA5, LAMA1, CASP3, LAMA2
iMyoblast vs S2B	KEGG	Up	hsa05169	Epstein-Barr virus infection	156	30	14	0.000416422	0.843622	0.00685233	1	HLA-E, NFKBIA, CD44, PLCG2, TRAF3, PSMD2, TAP1, TRADD, TAPBP, MAP2K3, VIM, IKBKE, CD58, NCOR2, CDK2, TAP2, DDB2, AKT3, BAX, CCND1, HLA-B, IKBKG, FAS, MAPK12, IRAK1, PIK3CB, HLA-DPB1, HLA-A, JUN, HLA-C	RBPJ, SKP2, GADD45G, BCL2L11, CCND3, CASP9, MAP3K7, TRAF5, TRAF6, CCND2, DDX58, STAT2, CASP3, ICAM1
iMyoblast vs S2B	KEGG	Down	hsa05410	Hypertrophic cardiomyopathy	69	11	31	0.0820478	5.51888e-13	0.275681	1.85434e-10	TGFB1, ITGB1, ITGB5, TPM3, ITGA2, TPM4, ITGA5, ITGA3, ACTB, ACTG1, CACNB3	TNNC1, MYH7, DAG1, CACNA2D1, CACNB1, DES, TTN, ATP2A1, CACNA1S, TNNT2, ACTC1, SGCA, ATP2A2, TNNI3, MYL3, PRKAB2, ITGB6, ITGA4, PRKAA2, ITGA7, DMD, LAMA1, ITGB8, TGFB3, SGCD, CACNG4, SGCG, IGF1, TPM2, CACNG6
iMyoblast vs S2B	KEGG	Down	hsa05414	Dilated cardiomyopathy	69	12	30	0.0405776	3.66665e-12	0.168322	6.15996e-10	TGFB1, ITGB1, ITGB5, TPM3, ITGA2, TPM4, ITGA5, ITGA3, ACTB, ACTG1, ADCY7, CACNB3	TNNC1, MYH7, DAG1, CACNA2D1, CACNB1, DES, TTN, ATP2A1, CACNA1S, TNNT2, ACTC1, SGCA, ATP2A2, TNNI3, MYL3, ITGB6, ITGA4, ITGA7, DMD, LAMA1, ADCY2, ITGB8, TGFB3, SGCD, CACNG4, SGCG, IGF1, TPM2, CACNG6, LAMA2
iMyoblast vs S2B	KEGG	Down	hsa04260	Cardiac muscle contraction	62	5	23	0.709449	1.69447e-08	1	1.8978e-06	ASPH, TPM3, TPM4, SLC9A1, CACNB3	CASQ2, TNNC1, MYH7, HRC, CACNA2D1, CACNB1, COX7B, MYL4, UQCRC2, ATP2A1, CACNA1S, TNNT2, ACTC1, COX6A2, ATP2A2, TNNI3, MYL3, ATP1A1, ATP1A2, CACNG4, TPM2, CACNG6, COX7A1
iMyoblast vs S2B	KEGG	Down	hsa05412	Arrhythmogenic right ventricular cardiomyopathy	60	11	23	0.0377665	3.45183e-08	0.158619	2.89954e-06	ITGB1, CDH2, ITGB5, ITGA2, ITGA5, ITGA3, ACTB, ACTG1, CACNB3, GJA1, DSG2	ACTN2, DAG1, CACNA2D1, CACNB1, DES, ATP2A1, CACNA1S, SGCA, PKP2, ATP2A2, ITGB6, CTNNB1, ITGA4, ITGA7, DMD, LAMA1, DSC2, ITGB8, SGCD, CACNG4, SGCG, CACNG6, LAMA2
iMyoblast vs S2B	KEGG	Down	hsa00100	Steroid biosynthesis	17	1	11	0.83289	1.58704e-07	1	1.06649e-05	SOAT1	MSMO1, TM7SF2, SQLE, FDFT1, LSS, DHCR7, HSD17B7, NSDHL, SC5D, DHCR24, CYP51A1
iMyoblast vs S2B	KEGG	Down	hsa04261	Adrenergic signaling in cardiomyocytes	102	13	26	0.224584	2.72126e-05	0.539002	0.00152391	TPM3, TPM4, ATP2B4, SLC9A1, GNAI2, CREB3L1, ADCY7, AKT3, CACNB3, MAPK12, PLCB4, RAPGEF3, AGTR1	TNNC1, MYH7, CACNA2D1, CACNB1, CALM1, PPP2R3B, MYL4, ATP2A1, CACNA1S, CAMK2D, TNNT2, ATP2B1, ACTC1, ATP2A2, TNNI3, MYL3, RPS6KA5, ATP1A1, ADCY2, CAMK2B, ATP1A2, CAMK2A, CACNG4, ATP2B3, TPM2, CACNG6
iMyoblast vs S2B	KEGG	Down	hsa05416	Viral myocarditis	40	10	14	0.0044736	4.01768e-05	0.0366617	0.00192849	HLA-E, ACTB, ACTG1, CD55, CCND1, HLA-B, CAV1, HLA-DPB1, HLA-A, HLA-C	MYH7, DAG1, CXADR, CASP9, SGCA, FYN, DMD, LAMA1, ITGB2, SGCD, SGCG, CASP3, LAMA2, ICAM1
iMyoblast vs S2B	KEGG	Down	hsa04020	Calcium signaling pathway	120	17	28	0.122693	0.000155967	0.355387	0.00655062	ASPH, PDE1C, ATP2B4, PLCG2, SPHK1, ORAI2, ADCY7, EGFR, HTR7, CAMK1, PTGER1, PLCB4, OXTR, CAMK1G, ADORA2B, CACNA1A, AGTR1	CASQ2, RYR1, ERBB3, TNNC2, TNNC1, HRC, CALM1, ATP2A1, CACNA1S, CAMK2D, ATP2B1, ATP2A2, CACNA1H, MCU, ERBB2, P2RX5, EDNRB, MCOLN3, PLCE1, P2RX6, ADCY2, CAMK2B, CHRM3, PDGFD, CAMK2A, ATP2B3, MYLK3, PDGFB
iMyoblast vs S2B	KEGG	Down	hsa00500	Starch and sucrose metabolism	20	3	8	0.334009	0.000840319	0.606633	0.0313719	PGM2, PYGB, GBE1	GYG2, PYGL, GYG1, PYGM, GAA, GYS1, PGM1, AGL
iMyoblast vs S2B	KEGG	Down	hsa04921	Oxytocin signaling pathway	105	14	23	0.189299	0.00115094	0.47823	0.0386715	GNAI2, ACTB, ACTG1, ADCY7, EGFR, CCND1, CACNB3, PPP1R12C, CAMK1, PLCB4, OXTR, CAMK1G, JUN, RCAN1	RYR1, MEF2C, CACNA2D1, CACNB1, CALM1, KCNJ6, CACNA1S, CAMK2D, MYL6B, GUCY1A2, RGS2, PRKAB2, KCNJ12, PRKAA2, PPP1R12B, ADCY2, CAMK2B, CAMK2A, CACNG4, KCNJ2, CACNG6, MYLK3, MAP2K5
iMyoblast vs S2B	KEGG	Down	hsa04740	Olfactory transduction	23	2	8	0.718556	0.0031389	1	0.095879	PDE1C, ARRB2	GRK3, CALM1, CAMK2D, RGS2, NCALD, CAMK2B, PRKG1, CAMK2A
iMyoblast vs S2B	KEGG	Down	hsa04512	ECM-receptor interaction	64	16	15	0.00052834	0.00383874	0.00806919	0.106352	ITGB1, SV2A, ITGB5, ITGA2, CD44, LAMB3, FN1, ITGA5, SDC1, ITGA3, AGRN, SPP1, CD47, COL4A2, COL4A1, LAMA3	NPNT, DAG1, CD36, ITGB6, ITGA4, FRAS1, COL2A1, ITGA7, LAMA5, LAMA1, COL9A3, FREM2, ITGB8, TNXB, LAMA2
iMyoblast vs S2B	KEGG	Down	hsa00900	Terpenoid backbone biosynthesis	20	0	7	1	0.00411704	1	0.106352		HMGCS1, IDI1, FDPS, MVD, HMGCR, ACAT2, MVK
iMyoblast vs S2B	KEGG	Down	hsa04713	Circadian entrainment	58	8	14	0.250783	0.00443132	0.566091	0.106352	GNGT2, GNG12, GNB5, GNAI2, GNG2, ADCY7, PLCB4, GNG11	RYR1, CALM1, KCNJ6, CAMK2D, GUCY1A2, CACNA1H, RPS6KA5, ADCY2, CAMK2B, PRKG1, CAMK2A, GNB3, PER1, GRIA1
iMyoblast vs S2B	KEGG	Down	hsa04970	Salivary secretion	42	7	11	0.138428	0.00572446	0.378145	0.128228	ATP2B4, SLC9A1, KCNMA1, ADCY7, BST1, KCNN4, PLCB4	CALM1, GUCY1A2, ATP2B1, ATP1A1, ADCY2, PRH1, ATP1A2, CHRM3, PRKG1, ATP2B3, SLC12A2
iMyoblast vs S2B	KEGG	Down	hsa00072	Synthesis and degradation of ketone bodies	8	0	4	1	0.0062026	1	0.130255		HMGCS1, ACAT2, BDH2, OXCT2
iMyoblast vs S2B	KEGG	Down	hsa04080	Neuroactive ligand-receptor interaction	95	15	19	0.0727393	0.0111845	0.25343	0.221058	F2RL2, NR3C1, TSPO, GABBR1, SSTR1, HTR7, CGA, GABRE, PTGER1, PTGIR, OXTR, ADORA2B, NMB, AGTR1, CHRNA5	C5, CHRND, LPAR4, CHRNB1, SCT, NPY, P2RX5, CHRNA1, EDNRB, ADORA1, P2RX6, RLN2, GRIK1, PTH1R, LPAR2, CHRM3, CHRNG, GRIA1, P2RY1
iMyoblast vs S2B	KEGG	Down	hsa04514	Cell adhesion molecules	86	26	17	2.33722e-07	0.0140762	3.92653e-05	0.244392	HLA-E, ITGB1, CDH2, ESAM, SDC1, CD58, CNTNAP1, ALCAM, ICAM3, PVR, NEGR1, VCAN, HLA-B, CLDN1, NLGN2, PTPRM, HLA-DPB1, PDCD1LG2, CD274, HLA-A, NECTIN1, PTPRF, NLGN1, CNTN1, HLA-C, NTNG1	JAM3, CLDN5, CLDN10, NCAM1, CDH15, NECTIN3, ICOSLG, JAM2, ITGA4, SDC2, ITGB2, ITGB8, SELPLG, CLDN6, VSIR, CADM1, ICAM1
iMyoblast vs S2B	KEGG	Down	hsa03320	PPAR signaling pathway	46	6	11	0.365811	0.014335	0.650331	0.244392	MMP1, ME1, CPT1A, PPARD, FABP4, PLIN2	HMGCS1, SORBS1, FABP3, ACSL3, SCD, CD36, DBI, PLTP, CYP27A1, ACSL1, ME3
iMyoblast vs S2B	KEGG	Down	hsa04979	Cholesterol metabolism	30	4	8	0.376973	0.0155462	0.661701	0.244392	NCEH1, LRP1, TSPO, SOAT1	CD36, LDLR, APOE, APOC1, MYLIP, PLTP, SORT1, CYP27A1

## Sheet: P.Myo vs bMes
Supplementary file 2. Top 20 Up and Down GO terms (BP, CC, MF) and KEGG pathways for pairwise cell type comparisons. Terms comprising N (< 500) genes are sorted by P.Up and P.Down. For each term, the top Genes.Up and Genes.Down are listed.
Comparison	Ont	Dir	GO/KEGG ID	GO Term / KEGG Pathway (top 20 Up and Down)	N	Up	Down	P.Up	P.Down	FDR.Up	FDR.Down	Genes.Up (limited to a maximum of the top 30 Up genes)	Genes.Down (limited to a maximum of the top 30 Down genes)
bMyo vs bMes	BP	Up	GO:0022604	regulation of cell morphogenesis	382	30	16	5.69995e-09	0.00267988	6.58242e-05	0.175054	RHOBTB3, CHN1, MDK, SEMA4C, DRAXIN, LZTS1, PLEKHO1, NEDD4L, RASA1, SLC9A3R1, KIF13B, ITGA7, FMNL1, SHTN1, KALRN, RREB1, CDC42EP3, SIPA1L1, ZSWIM6, ID1, THY1, L1CAM, FBLIM1, PRAG1, PPP1R9A, EZR, TUBB2B, ARHGAP4, FBLN1, TNIK	SLIT2, DOCK5, NLGN1, POSTN, FERMT2, DLC1, NFATC4, SEMA5A, SHOX2, FGD4, RELN, EPB41L3, LIMS2, CDC42EP2, CCL2, NGF
bMyo vs bMes	BP	Up	GO:0014902	myotube differentiation	84	14	2	7.66934e-09	0.476038	6.58242e-05	1	MYF5, PLEKHO1, TRIM72, MYF6, SORT1, SIX4, CDON, TBX1, RBM24, MYOD1, CYP26B1, SIX1, DMPK, TANC1	SHOX2, ANKRD2
bMyo vs bMes	BP	Up	GO:0007517	muscle organ development	322	27	11	9.72054e-09	0.0453512	6.58242e-05	0.659341	SOX11, MYF5, TRIM72, MYF6, SGCA, PAX7, ITGA7, VAMP5, PAX3, ACTC1, SIX4, ADARB1, JPH2, CDON, TBX1, RBM24, MYOD1, CYP26B1, SIX1, CHRNA1, IGSF8, VANGL2, MYLK, ASS1, EFNB2, SRPK3, ZBTB18	MEOX2, TGFBR3, GATA6, DSP, COL11A1, KCNK2, SHOX2, FGF2, TBX2, COL6A3, ANKRD2
bMyo vs bMes	BP	Up	GO:0060538	skeletal muscle organ development	137	17	3	2.01746e-08	0.486156	0.000102462	1	SOX11, MYF5, MYF6, PAX7, VAMP5, SIX4, CDON, TBX1, RBM24, MYOD1, CYP26B1, SIX1, CHRNA1, IGSF8, ASS1, SRPK3, ZBTB18	MEOX2, SHOX2, ANKRD2
bMyo vs bMes	BP	Up	GO:0035914	skeletal muscle cell differentiation	54	11	1	3.9567e-08	0.648712	0.000160761	1	SOX11, MYF5, MYF6, PAX7, SIX4, CDON, TBX1, RBM24, MYOD1, CYP26B1, SIX1	ANKRD2
bMyo vs bMes	BP	Up	GO:0007519	skeletal muscle tissue development	129	16	3	5.33273e-08	0.44672	0.000180557	1	SOX11, MYF5, MYF6, PAX7, VAMP5, SIX4, CDON, TBX1, RBM24, MYOD1, CYP26B1, SIX1, CHRNA1, IGSF8, SRPK3, ZBTB18	MEOX2, SHOX2, ANKRD2
bMyo vs bMes	BP	Up	GO:0048704	embryonic skeletal system morphogenesis	77	12	5	2.20066e-07	0.0160794	0.000638663	0.442159	SOX11, MYF5, HOXB7, HOXB6, HOXB4, HOXB2, HOXB5, HOXB3, SIX4, TBX1, SIX1, HOXA3	OSR2, PDGFRA, COL11A1, SHOX2, DLX2
bMyo vs bMes	BP	Up	GO:0048643	positive regulation of skeletal muscle tissue development	21	7	1	3.08973e-07	0.331746	0.000784598	1	MYF5, MYF6, CDON, TBX1, RBM24, MYOD1, CYP26B1	SHOX2
bMyo vs bMes	BP	Up	GO:0048641	regulation of skeletal muscle tissue development	43	9	1	5.27312e-07	0.563538	0.00119026	1	MYF5, MYF6, SIX4, CDON, TBX1, RBM24, MYOD1, CYP26B1, SIX1	SHOX2
bMyo vs bMes	BP	Up	GO:0048706	embryonic skeletal system development	103	13	6	9.10743e-07	0.0146669	0.00185017	0.419868	SOX11, MYF5, HOXB7, HOXB6, HOXB4, HOXB2, HOXB5, HOXB3, PAX7, SIX4, TBX1, SIX1, HOXA3	OSR2, PDGFRA, HOXC6, COL11A1, SHOX2, DLX2
bMyo vs bMes	BP	Up	GO:0010769	regulation of cell morphogenesis involved in differentiation	245	20	10	1.23016e-06	0.0189022	0.00197275	0.448781	CHN1, MDK, SEMA4C, DRAXIN, LZTS1, NEDD4L, KIF13B, SHTN1, KALRN, RREB1, SIPA1L1, ZSWIM6, ID1, THY1, L1CAM, PPP1R9A, TUBB2B, ARHGAP4, FBLN1, TNIK	SLIT2, DOCK5, NLGN1, POSTN, NFATC4, SEMA5A, SHOX2, RELN, LIMS2, NGF
bMyo vs bMes	BP	Up	GO:0010975	regulation of neuron projection development	386	26	13	1.28328e-06	0.0334711	0.00197275	0.606274	CHN1, MDK, SEMA4C, DRAXIN, LZTS1, PLK2, NEDD4L, KIF13B, SHTN1, KALRN, LYN, SIPA1L1, ZSWIM6, ID1, PTPRF, THY1, L1CAM, PRAG1, ITGA6, PPP1R9A, EFNB2, PTK7, TUBB2B, ARHGAP4, ITGA3, TNIK	SLIT2, NLGN1, HGF, SFRP1, KLF4, CREB3L2, NEGR1, NFATC4, SEMA5A, SHOX2, RELN, NGF, CAMK1
bMyo vs bMes	BP	Up	GO:0060537	muscle tissue development	315	23	12	1.39578e-06	0.0176639	0.00197275	0.448781	SOX11, MYF5, MYF6, ALPK3, CSRP2, PAX7, VAMP5, ACTC1, SIX4, JPH2, CDON, TBX1, RBM24, MYOD1, CYP26B1, SIX1, SMAD1, CHRNA1, IGSF8, MYLK, EFNB2, SRPK3, ZBTB18	MEOX2, TGFBR3, PDGFRA, GATA6, DSP, COL11A1, PDGFRB, KCNK2, SHOX2, FGF2, TBX2, ANKRD2
bMyo vs bMes	BP	Up	GO:0045664	regulation of neuron differentiation	490	30	17	1.44633e-06	0.0126894	0.00197275	0.385907	SOX11, CHN1, MDK, SEMA4C, DRAXIN, LZTS1, PLK2, NEDD4L, KIF13B, CDON, SHTN1, KALRN, TGIF2, SIX1, LYN, SIPA1L1, ZSWIM6, ID1, PTPRF, THY1, L1CAM, PRAG1, ITGA6, PPP1R9A, EFNB2, PTK7, TUBB2B, ARHGAP4, ITGA3, TNIK	BMP6, SLIT2, GLI2, NLGN1, HGF, SFRP1, KLF4, CREB3L2, NEGR1, NFATC4, SEMA5A, SHOX2, DLX2, RELN, NOTCH3, NGF, CAMK1
bMyo vs bMes	BP	Up	GO:0048667	cell morphogenesis involved in neuron differentiation	455	28	12	2.83904e-06	0.157926	0.00339266	1	CHN1, SEMA4C, DRAXIN, LZTS1, NEDD4L, STMN1, SLC9A3R1, KIF13B, EPHB4, ENAH, PALLD, ADARB1, SHTN1, KALRN, SIPA1L1, NCAM1, ZSWIM6, ID1, THY1, VANGL2, L1CAM, PPP1R9A, EFNB2, EZR, TUBB2B, ARHGAP4, APBB2, TNIK	DOK1, SLIT2, GLI2, NLGN1, DOK5, NFATC4, SEMA5A, SHOX2, RELN, NPTX1, NGF, LAMA1
bMyo vs bMes	BP	Up	GO:0021602	cranial nerve morphogenesis	19	6	0	3.10254e-06	1	0.00349323	1	HOXB2, HOXB3, ADARB1, TBX1, SIX1, HOXA3
bMyo vs bMes	BP	Up	GO:0003002	regionalization	238	19	9	3.26711e-06	0.0388326	0.00349323	0.615617	MYF5, HOXB7, HOXB6, HOXB4, SMARCD3, HOXB2, HOXB5, AR, MYF6, HOXB3, PAX7, CDON, TBX1, CYP26B1, SIX1, HOXA3, VANGL2, LFNG, SPRY1	MEOX2, GLI2, SFRP1, HOXC6, TBX18, HHIP, DLX2, RELN, HOXC8
bMyo vs bMes	BP	Up	GO:0030855	epithelial cell differentiation	411	26	12	3.55951e-06	0.0898901	0.00361557	0.903572	SOX11, ZFP36L1, CNN3, HOXB5, CLIC4, AR, SLC9A3R1, PALLD, TRIM16, COL18A1, H2AFY2, TBX1, PITX3, ERRFI1, CYP26B1, MTSS1, MET, SIX1, ID1, JUP, PTK7, EZR, DLX3, KRT80, LCE3A, LBH	BMP6, KLF4, KRT7, GATA6, CTSK, DSP, GPR4, PPARG, CTSL, S1PR2, LAMA1, BCR
bMyo vs bMes	BP	Up	GO:0098528	skeletal muscle fiber differentiation	6	4	0	4.40875e-06	1	0.00426494	1	SIX4, TBX1, RBM24, CYP26B1
bMyo vs bMes	BP	Up	GO:0048812	neuron projection morphogenesis	494	29	15	4.84179e-06	0.0504181	0.00428359	0.708022	CHN1, SEMA4C, DRAXIN, LZTS1, NEDD4L, STMN1, KIF13B, EPHB4, ENAH, PALLD, ADARB1, SHTN1, KALRN, SIPA1L1, NCAM1, ZSWIM6, ID1, THY1, VANGL2, L1CAM, DDR1, PPP1R9A, EFNB2, EZR, TUBB2B, WEE1, ARHGAP4, APBB2, TNIK	DOK1, SLIT2, GLI2, NLGN1, DOK5, POSTN, CNTNAP1, NFATC4, SEMA5A, SHOX2, RELN, EPB41L3, NPTX1, NGF, LAMA1
bMyo vs bMes	BP	Down	GO:0030198	extracellular matrix organization	269	13	28	0.0100253	1.44425e-13	0.562607	6.31745e-10	MYF5, TNFRSF1B, ITGA7, ANTXR1, COL18A1, OLFML2A, TGFBI, ITGA6, DDR1, FBN2, FBLN1, APBB2, ITGA3	TNXB, ABI3BP, LOXL3, MMP1, PDGFRA, SCUBE3, COL9A3, BGN, POSTN, FBN1, COL16A1, TIMP1, CTSK, LAMA4, ITGA5, COL11A1, FGF2, COL6A3, COL22A1, FOXF2, LAMC2, CCDC80, CTSL, IL6, THSD4, COL6A1, LAMA1, AEBP1
bMyo vs bMes	BP	Down	GO:0043062	extracellular structure organization	270	13	28	0.0102589	1.55487e-13	0.572551	6.31745e-10	MYF5, TNFRSF1B, ITGA7, ANTXR1, COL18A1, OLFML2A, TGFBI, ITGA6, DDR1, FBN2, FBLN1, APBB2, ITGA3	TNXB, ABI3BP, LOXL3, MMP1, PDGFRA, SCUBE3, COL9A3, BGN, POSTN, FBN1, COL16A1, TIMP1, CTSK, LAMA4, ITGA5, COL11A1, FGF2, COL6A3, COL22A1, FOXF2, LAMC2, CCDC80, CTSL, IL6, THSD4, COL6A1, LAMA1, AEBP1
bMyo vs bMes	BP	Down	GO:0006954	inflammatory response	396	12	27	0.209661	7.06313e-09	1	1.10375e-05	MDK, MGST2, TNFRSF1B, NFKBIZ, CSF1, CYP26B1, VAMP8, LYN, SMAD1, DUSP10, ASS1, GBP5	BMP6, PTGS1, LXN, LOXL3, PTGIR, IL17RC, HGF, IL1RL1, KLF4, CXCL5, TIMP1, NFATC4, SPHK1, SOCS5, CTSC, PTGS2, PPARG, IL6, CXCL3, CCL2, CXCL8, CXCL2, MAPK13, TSPAN2, IL33, TNFAIP3, BCR
bMyo vs bMes	BP	Down	GO:0048514	blood vessel morphogenesis	454	22	29	0.00099758	9.54332e-09	0.134211	1.3848e-05	CDH13, MDK, ZFP36L1, TEAD2, PLK2, CLIC4, RASA1, HOXB3, EPHB4, MIA3, COL18A1, TBX1, SIX1, SMAD1, ID1, THY1, TGFBI, HOXA3, MYLK, JUP, EFNB2, MCAM	MEOX2, TGFBR3, SLIT2, RASIP1, PDGFRA, HGF, SFRP1, KLF4, GATA6, HSPB6, ITGA5, GPR4, NFATC4, SEMA5A, PDGFRB, SPHK1, FGF2, TBX2, PTGS2, PPARG, IL6, ESM1, CCL2, CXCL8, NOTCH3, DDAH1, TNFAIP3, SH2D2A, LAMA1
bMyo vs bMes	BP	Down	GO:0001525	angiogenesis	378	17	26	0.0076899	1.40113e-08	0.491837	1.8976e-05	CDH13, MDK, PLK2, CLIC4, HOXB3, EPHB4, MIA3, COL18A1, TBX1, SMAD1, ID1, THY1, TGFBI, HOXA3, JUP, EFNB2, MCAM	MEOX2, SLIT2, RASIP1, PDGFRA, HGF, SFRP1, KLF4, GATA6, HSPB6, ITGA5, GPR4, NFATC4, SEMA5A, PDGFRB, SPHK1, FGF2, PTGS2, PPARG, IL6, ESM1, CCL2, CXCL8, NOTCH3, DDAH1, TNFAIP3, SH2D2A
bMyo vs bMes	BP	Down	GO:0007186	G protein-coupled receptor signaling pathway	413	11	27	0.354742	1.57609e-08	1	2.00114e-05	STMN1, SLC9A3R1, SORT1, RGS12, RGS16, RGS3, KALRN, MET, EZR, GNG2, GABRB2	ADGRL2, PDE1A, PLCB1, PENK, PTGIR, CCR10, CXCL5, GPR4, PDGFRB, SPHK1, KCNK2, FGD4, RGS10, CA2, PDE3A, PPARG, CXCL3, NPR3, S1PR2, F2RL2, CCL2, CXCL8, AREG, CXCL2, GNG11, PDE7B, DNM1
bMyo vs bMes	BP	Down	GO:0033002	muscle cell proliferation	151	3	16	0.687997	2.72948e-08	1	3.26172e-05	CDH13, SIX1, SMAD1	PDE1A, TGFBR3, PTGIR, KLF4, GATA6, PDGFRB, KCNK2, FGF2, TBX2, PTGS2, PPARG, IL6, NPR3, PRKG1, NOTCH3, TNFAIP3
bMyo vs bMes	BP	Down	GO:0008015	blood circulation	328	14	22	0.0213582	2.75136e-07	0.783384	0.000294179	DES, HOXB2, NEDD4L, AR, C9orf3, SCN5A, CELF2, ACTC1, ATP2B1, DMPK, JUP, SNTA1, ITPR1, MME	MEOX2, BMP6, PTGS1, SLIT2, DOCK5, POSTN, CACNA1C, KCNE4, DSP, ABCC9, TBX2, PDE3A, PTGS2, PPARG, SLC1A1, IL6, NPR3, PRKG1, DDAH1, KCNJ8, CACNA2D1, BCR
bMyo vs bMes	BP	Down	GO:0070098	chemokine-mediated signaling pathway	26	0	7	1	4.10358e-07	1	0.000407523		SLIT2, CCR10, CXCL5, CXCL3, CCL2, CXCL8, CXCL2
bMyo vs bMes	BP	Down	GO:0060326	cell chemotaxis	162	4	15	0.521931	4.24239e-07	1	0.000407523	MDK, CSF1, MET, LYN	LGMN, SLIT2, PDGFRA, IL17RC, HGF, CCR10, CXCL5, SEMA5A, PDGFRB, FGF2, IL6, CXCL3, CCL2, CXCL8, CXCL2
bMyo vs bMes	BP	Down	GO:0003013	circulatory system process	337	14	22	0.026268	4.41324e-07	0.807141	0.000407523	DES, HOXB2, NEDD4L, AR, C9orf3, SCN5A, CELF2, ACTC1, ATP2B1, DMPK, JUP, SNTA1, ITPR1, MME	MEOX2, BMP6, PTGS1, SLIT2, DOCK5, POSTN, CACNA1C, KCNE4, DSP, ABCC9, TBX2, PDE3A, PTGS2, PPARG, SLC1A1, IL6, NPR3, PRKG1, DDAH1, KCNJ8, CACNA2D1, BCR
bMyo vs bMes	BP	Down	GO:0048660	regulation of smooth muscle cell proliferation	102	1	12	0.911012	5.04506e-07	1	0.00044561	CDH13	PDE1A, PTGIR, KLF4, PDGFRB, FGF2, PTGS2, PPARG, IL6, NPR3, PRKG1, NOTCH3, TNFAIP3
bMyo vs bMes	BP	Down	GO:0048659	smooth muscle cell proliferation	104	1	12	0.914718	6.11044e-07	1	0.000517223	CDH13	PDE1A, PTGIR, KLF4, PDGFRB, FGF2, PTGS2, PPARG, IL6, NPR3, PRKG1, NOTCH3, TNFAIP3
bMyo vs bMes	BP	Down	GO:0045765	regulation of angiogenesis	214	5	17	0.562372	6.84836e-07	1	0.000548408	MDK, PLK2, SMAD1, ID1, JUP	MEOX2, HGF, SFRP1, KLF4, GATA6, HSPB6, ITGA5, GPR4, SEMA5A, SPHK1, FGF2, PTGS2, PPARG, IL6, CXCL8, DDAH1, TNFAIP3
bMyo vs bMes	BP	Down	GO:0061448	connective tissue development	214	8	17	0.129668	7.01876e-07	1	0.000548408	MYF5, MDK, HOXB3, PAX7, CSF1, SMAD1, TGFBI, HOXA3	BMP6, OSR2, GLI2, CREB3L2, EBF2, TIMP1, CTSK, GPR4, COL11A1, PDGFRB, SHOX2, FGF2, COL6A3, DLX2, SELENOM, DGAT2, COL6A1
bMyo vs bMes	BP	Down	GO:0045165	cell fate commitment	148	11	14	0.000674088	7.99945e-07	0.101438	0.000601884	MYF5, AR, MYF6, PAX7, CDON, TBX1, MYOD1, CYP26B1, SIX1, SMAD1, GAS1	LOXL3, GLI2, SFRP1, KLF4, GATA6, EBF2, TBX18, FGF2, TBX2, DLX2, PPARG, LMO4, IL6, NOTCH3
bMyo vs bMes	BP	Down	GO:0050865	regulation of cell activation	332	11	21	0.148546	1.25352e-06	1	0.000878112	SOX11, MDK, ZFP36L1, TNFRSF1B, NFKBIZ, CYP26B1, VAMP8, LYN, DUSP10, THY1, EFNB2	LOXL3, PDGFRA, GLI2, LRRC32, SFRP1, IL1RL1, ZFP36L2, CD70, PDGFRB, SPHK1, SOCS5, CTSC, LMO4, IL6, PRKG1, CCL2, INHBA, IL33, UBASH3B, TNFAIP3, BCR
bMyo vs bMes	BP	Down	GO:0044057	regulation of system process	365	19	22	0.000946524	1.77659e-06	0.129051	0.00120305	DES, GLS, TNFRSF1B, SLC9A3R1, SGCA, SCN5A, CELF2, ATP2B1, ERRFI1, TMEM98, GTF2IRD1, DMPK, WNK3, JUP, SNTA1, NPTX2, ITPR1, FOXO1, NLGN4X	BMP6, DOCK5, NLGN1, HGF, CACNA1C, KLF4, HSPB6, KCNE4, DSP, ABCC9, SPHK1, WNK4, TBX2, CTSC, RELN, PTGS2, SLC1A1, PRKG1, S1PR2, INHBA, NPTX1, CACNA2D1
bMyo vs bMes	BP	Down	GO:0034104	negative regulation of tissue remodeling	13	0	5	1	2.47699e-06	1	0.00152485		SFRP1, IL6, UBASH3B, TNFAIP3, BCR
bMyo vs bMes	BP	Down	GO:1990868	response to chemokine	34	0	7	1	2.93702e-06	1	0.00170473		SLIT2, CCR10, CXCL5, CXCL3, CCL2, CXCL8, CXCL2
bMyo vs bMes	CC	Up	GO:0030175	filopodium	92	12	4	1.45662e-06	0.098235	0.00197275	0.92907	SLC9A3R1, ENAH, ANTXR1, ACTC1, SHTN1, NPTX2, ITGA6, PPP1R9A, EZR, ACTG2, SYNE2, ITGA3	NLGN1, KITLG, FGD4, IGF2BP1
bMyo vs bMes	CC	Up	GO:0098858	actin-based cell projection	152	15	6	2.82302e-06	0.071395	0.00339266	0.817584	CLIC4, SLC9A3R1, KIF13B, ENAH, ANTXR1, ACTC1, SHTN1, CA9, NPTX2, ITGA6, PPP1R9A, EZR, ACTG2, SYNE2, ITGA3	PDGFRA, NLGN1, KITLG, FGD4, CA2, IGF2BP1
bMyo vs bMes	CC	Up	GO:0005925	focal adhesion	385	24	11	1.32737e-05	0.120248	0.00749043	1	CDH13, CNN3, CSRP2, ENAH, PALLD, ACTC1, TLN2, PLAU, TNS3, THY1, CAPN5, L1CAM, JUP, FBLIM1, PRAG1, ITGA6, ATAT1, EFNB2, PTK7, EZR, SYNE2, MCAM, MME, ITGA3	APBB1IP, PROCR, FERMT2, DLC1, ITGA5, PDGFRB, CD59, LIMS2, HMGA1, PVR, PDLIM1
bMyo vs bMes	CC	Up	GO:0030055	cell-substrate junction	390	24	11	1.63157e-05	0.127879	0.00895822	1	CDH13, CNN3, CSRP2, ENAH, PALLD, ACTC1, TLN2, PLAU, TNS3, THY1, CAPN5, L1CAM, JUP, FBLIM1, PRAG1, ITGA6, ATAT1, EFNB2, PTK7, EZR, SYNE2, MCAM, MME, ITGA3	APBB1IP, PROCR, FERMT2, DLC1, ITGA5, PDGFRB, CD59, LIMS2, HMGA1, PVR, PDLIM1
bMyo vs bMes	CC	Up	GO:0099572	postsynaptic specialization	264	17	8	0.000147059	0.128039	0.0377554	1	SEMA4C, CNN3, LZTS1, GRASP, RAPSN, LYN, SIPA1L1, TANC2, CHRNA1, ITPR1, PPP1R9A, EFNB2, GABRB2, TANC1, P2RX6, TNIK, NLGN4X	NLGN1, CACNA1C, GRIA1, EPB41L3, ADD3, CAMK1, BCR, DNM1
bMyo vs bMes	CC	Up	GO:0031594	neuromuscular junction	66	8	1	0.00014868	0.721273	0.0377554	1	DES, TUBA1A, RAPSN, CDH15, SYNGR1, CHRNA1, SNTA1, PPP1R9A	POSTN
bMyo vs bMes	CC	Up	GO:0044297	cell body	378	21	6	0.000203409	0.723808	0.0474971	1	CNN3, LZTS1, TNFRSF1B, TTLL7, SORT1, KCNN3, ACTC1, SHTN1, ATP2B1, PITX3, PTPRF, THY1, L1CAM, NPTX2, ASS1, PPP1R9A, EZR, ACTG2, MME, TANC1, P2RX6	PDE1A, PENK, CACNA1C, GRIA1, KCNK2, RGS10
bMyo vs bMes	CC	Up	GO:0015629	actin cytoskeleton	415	22	5	0.000306688	0.900549	0.0587771	1	PDLIM3, CNN3, CLIC4, FERMT3, SLC9A3R1, STK17B, PALLD, ACTC1, LSP1, TLN2, KALRN, MTSS1, CDC42EP3, FMN1, GBP2, VANGL2, MYLK, JUP, FBLIM1, PPP1R9A, EZR, SH2B2	FERMT2, DLC1, FHOD1, PDLIM1, NOTCH3
bMyo vs bMes	CC	Up	GO:0031252	cell leading edge	332	19	11	0.00032884	0.0548813	0.0618554	0.728846	PLEKHO1, RASA1, SLC9A3R1, ENAH, ANTXR1, PALLD, ACTC1, SHTN1, TLN2, ATP2B1, MTSS1, THY1, MYLK, PPP1R9A, EZR, ACTG2, SYNE2, SH2B2, APBB2	APBB1IP, LDB2, KITLG, GRIA1, FERMT2, DLC1, ITGA5, FGD4, EPB41L3, LMO4, IGF2BP1
bMyo vs bMes	CC	Up	GO:0009986	cell surface	444	22	24	0.000611586	3.12304e-06	0.0986061	0.00176235	CDH13, FCGRT, CLIC4, SCN5A, SORT1, ITGA7, ANTXR1, VAMP5, CDH15, TSPAN15, MET, PLAU, NCAM1, THY1, CAPN5, CHRNA1, L1CAM, ITGA6, MCAM, MME, ITGA3, NLGN4X	CD248, TGFBR3, PDGFRA, LRRC32, SCUBE3, BGN, NLGN1, IL17RC, TPBG, SFRP1, PROCR, IL1RL1, GRIA1, FERMT2, CCR10, VASN, ITGA5, PDGFRB, KCNK2, HHIP, CD59, PVR, AREG, NOTCH3
bMyo vs bMes	CC	Up	GO:0045121	membrane raft	226	14	4	0.000834513	0.623171	0.121094	1	CDH13, TNFRSF1B, TUBA1A, LYPD6, SLC9A3R1, SGCA, CTSD, SCN5A, CDH15, ATP2B1, LYN, THY1, EZR, MME	DLC1, ADD3, PTGS2, EFHD2
bMyo vs bMes	CC	Up	GO:0098857	membrane microdomain	227	14	4	0.000872148	0.62673	0.1239	1	CDH13, TNFRSF1B, TUBA1A, LYPD6, SLC9A3R1, SGCA, CTSD, SCN5A, CDH15, ATP2B1, LYN, THY1, EZR, MME	DLC1, ADD3, PTGS2, EFHD2
bMyo vs bMes	CC	Up	GO:0098589	membrane region	235	14	4	0.00121609	0.653608	0.157355	1	CDH13, TNFRSF1B, TUBA1A, LYPD6, SLC9A3R1, SGCA, CTSD, SCN5A, CDH15, ATP2B1, LYN, THY1, EZR, MME	DLC1, ADD3, PTGS2, EFHD2
bMyo vs bMes	CC	Up	GO:0016529	sarcoplasmic reticulum	54	6	2	0.00148061	0.270433	0.183405	1	JSRP1, JPH2, DMPK, RTN2, ITPR1, SYNE2	P3H2, CACNA2D1
bMyo vs bMes	CC	Up	GO:0043025	neuronal cell body	325	17	6	0.0015733	0.581265	0.18512	1	CNN3, TNFRSF1B, TTLL7, SORT1, KCNN3, SHTN1, ATP2B1, PITX3, PTPRF, THY1, L1CAM, NPTX2, ASS1, PPP1R9A, MME, TANC1, P2RX6	PDE1A, PENK, CACNA1C, GRIA1, KCNK2, RGS10
bMyo vs bMes	CC	Up	GO:0031674	I band	116	9	4	0.00162202	0.181358	0.18512	1	PDLIM3, DES, CSRP2, SCN5A, PALLD, ACTC1, JPH2, JUP, SYNE2	CACNA1C, FERMT2, PDLIM1, ANKRD2
bMyo vs bMes	CC	Up	GO:0014069	postsynaptic density	251	14	8	0.00227866	0.105163	0.232618	0.978107	SEMA4C, CNN3, LZTS1, GRASP, LYN, SIPA1L1, TANC2, ITPR1, PPP1R9A, EFNB2, TANC1, P2RX6, TNIK, NLGN4X	NLGN1, CACNA1C, GRIA1, EPB41L3, ADD3, CAMK1, BCR, DNM1
bMyo vs bMes	CC	Up	GO:0008305	integrin complex	25	4	1	0.00234799	0.376056	0.236793	1	ITGA7, LYN, ITGA6, ITGA3	ITGA5
bMyo vs bMes	CC	Up	GO:0098636	protein complex involved in cell adhesion	25	4	1	0.00234799	0.376056	0.236793	1	ITGA7, LYN, ITGA6, ITGA3	ITGA5
bMyo vs bMes	CC	Up	GO:0032279	asymmetric synapse	252	14	8	0.00236519	0.106978	0.236793	0.98427	SEMA4C, CNN3, LZTS1, GRASP, LYN, SIPA1L1, TANC2, ITPR1, PPP1R9A, EFNB2, TANC1, P2RX6, TNIK, NLGN4X	NLGN1, CACNA1C, GRIA1, EPB41L3, ADD3, CAMK1, BCR, DNM1
bMyo vs bMes	CC	Down	GO:0031012	extracellular matrix	310	14	36	0.0131154	9.28303e-19	0.662784	1.88585e-14	CDH13, MDK, ANGPTL2, LRRC17, CTSD, COL18A1, CDON, NCAM1, OLFML2A, TGFBI, L1CAM, ITGA6, FBN2, FBLN1	TNXB, PRG4, CD248, ABI3BP, TGFBR3, MMP1, LRRC32, COL9A3, BGN, SFRP1, POSTN, FBN1, COL16A1, HMCN1, PCOLCE, TFPI2, TIMP1, VASN, LAMA4, COL11A1, COL6A3, COL22A1, CTSC, RELN, LAMC2, CCDC80, CTSL, TIMP3, TINAGL1, P3H2
bMyo vs bMes	CC	Down	GO:0062023	collagen-containing extracellular matrix	254	12	28	0.0151398	3.22471e-14	0.708675	2.18367e-10	CDH13, MDK, ANGPTL2, CTSD, COL18A1, CDON, NCAM1, TGFBI, L1CAM, ITGA6, FBN2, FBLN1	TNXB, PRG4, ABI3BP, COL9A3, BGN, SFRP1, POSTN, FBN1, COL16A1, HMCN1, PCOLCE, TIMP1, LAMA4, COL11A1, COL6A3, CTSC, LAMC2, CCDC80, CTSL, TIMP3, TINAGL1, P3H2, LTBP1, THSD4, LRRC15, COL6A1, LAMA1, AEBP1
bMyo vs bMes	CC	Down	GO:0009986	cell surface	444	22	24	0.000611586	3.12304e-06	0.0986061	0.00176235	CDH13, FCGRT, CLIC4, SCN5A, SORT1, ITGA7, ANTXR1, VAMP5, CDH15, TSPAN15, MET, PLAU, NCAM1, THY1, CAPN5, CHRNA1, L1CAM, ITGA6, MCAM, MME, ITGA3, NLGN4X	CD248, TGFBR3, PDGFRA, LRRC32, SCUBE3, BGN, NLGN1, IL17RC, TPBG, SFRP1, PROCR, IL1RL1, GRIA1, FERMT2, CCR10, VASN, ITGA5, PDGFRB, KCNK2, HHIP, CD59, PVR, AREG, NOTCH3
bMyo vs bMes	CC	Down	GO:0005788	endoplasmic reticulum lumen	229	5	16	0.620684	7.54831e-06	1	0.00356614	NOTUM, MIA3, CSF1, COL18A1, TSPAN15	PENK, COL9A3, FBN1, COL16A1, TIMP1, COL11A1, COL6A3, COL22A1, CTSC, FSTL1, PTGS2, FKBP14, IL6, P3H2, LTBP1, COL6A1
bMyo vs bMes	CC	Down	GO:0005604	basement membrane	72	4	9	0.0870892	8.2587e-06	1	0.00381308	COL18A1, TGFBI, ITGA6, FBLN1	FBN1, HMCN1, TIMP1, LAMA4, LAMC2, CCDC80, TIMP3, P3H2, LAMA1
bMyo vs bMes	CC	Down	GO:0036021	endolysosome lumen	4	0	3	1	2.43079e-05	1	0.0087036		LGMN, CTSK, CTSL
bMyo vs bMes	CC	Down	GO:0005581	collagen trimer	51	1	6	0.691882	0.000341942	1	0.0546973	COL18A1	COL9A3, COL16A1, COL11A1, COL6A3, COL22A1, COL6A1
bMyo vs bMes	CC	Down	GO:0034703	cation channel complex	99	1	8	0.903146	0.000565255	1	0.071324	SCN5A	NLGN1, CACNA1C, GRIA1, KCNE4, ABCC9, KCNK2, KCNJ8, CACNA2D1
bMyo vs bMes	CC	Down	GO:0001527	microfibril	10	1	3	0.206345	0.000691166	1	0.0825943	FBN2	FBN1, LTBP1, THSD4
bMyo vs bMes	CC	Down	GO:0005589	collagen type VI trimer	3	0	2	1	0.001046	1	0.101188		COL6A3, COL6A1
bMyo vs bMes	CC	Down	GO:0098647	collagen beaded filament	3	0	2	1	0.001046	1	0.101188		COL6A3, COL6A1
bMyo vs bMes	CC	Down	GO:0036019	endolysosome	13	0	3	1	0.00168827	1	0.130905		LGMN, CTSK, CTSL
bMyo vs bMes	CC	Down	GO:0005775	vacuolar lumen	126	1	8	0.950806	0.00289502	1	0.179854	CTSD	LGMN, BGN, IMPDH1, CTSK, PDGFRB, CTSC, CTSL, PYGB
bMyo vs bMes	CC	Down	GO:0005593	FACIT collagen trimer	5	0	2	1	0.00342501	1	0.1949		COL9A3, COL16A1
bMyo vs bMes	CC	Down	GO:0033270	paranode region of axon	5	1	2	0.114263	0.00364743	1	0.200038	KIF13B	CNTNAP1, EPB41L3
bMyo vs bMes	CC	Down	GO:0031904	endosome lumen	17	0	3	1	0.00376162	1	0.204324		LGMN, CTSK, CTSL
bMyo vs bMes	CC	Down	GO:0034702	ion channel complex	134	4	8	0.374819	0.00381343	1	0.205938	CLIC4, SCN5A, CHRNA1, GABRB2	NLGN1, CACNA1C, GRIA1, KCNE4, ABCC9, KCNK2, KCNJ8, CACNA2D1
bMyo vs bMes	CC	Down	GO:0034705	potassium channel complex	38	0	4	1	0.00513217	1	0.240668		KCNE4, ABCC9, KCNK2, KCNJ8
bMyo vs bMes	CC	Down	GO:0005911	cell-cell junction	302	11	13	0.0989869	0.00532918	1	0.242408	DES, CLIC4, SGCA, SCN5A, VAMP5, FMN1, VANGL2, WNK3, JUP, PTK7, PARD6G	RASIP1, STEAP1, CNTNAP1, DSP, ITGA5, TMEM204, WNK4, EPB41L3, ADD3, PCDH9, LIMS2, FHOD1, LAMA1
bMyo vs bMes	CC	Down	GO:1902495	transmembrane transporter complex	143	4	8	0.421285	0.00560707	1	0.249642	CLIC4, SCN5A, CHRNA1, GABRB2	NLGN1, CACNA1C, GRIA1, KCNE4, ABCC9, KCNK2, KCNJ8, CACNA2D1
bMyo vs bMes	MF	Up	GO:0008200	ion channel inhibitor activity	28	6	1	4.17228e-05	0.421889	0.0178309	1	NEDD4L, RASA1, PACSIN3, VAMP8, WNK3, ITPR1	WNK4
bMyo vs bMes	MF	Up	GO:0016248	channel inhibitor activity	29	6	1	5.0786e-05	0.432211	0.0202298	1	NEDD4L, RASA1, PACSIN3, VAMP8, WNK3, ITPR1	WNK4
bMyo vs bMes	MF	Up	GO:0001228	DNA-binding transcription activator activity, RNA polymerase II-specific	277	18	11	9.92767e-05	0.0178767	0.0294647	0.448781	SOX11, MYF5, HOXB7, HOXB4, HOXB2, HOXB5, AR, MYF6, HOXB3, SIX4, TBX1, PITX3, MYOD1, RREB1, SIX1, SMAD1, TFDP2, DLX3	MEOX2, GLI2, KLF4, MEIS3, CREB3L2, EBF2, TBX18, EBF1, TBX2, DLX2, FOXF2
bMyo vs bMes	MF	Up	GO:0001216	DNA-binding transcription activator activity	278	18	11	0.000103261	0.0182472	0.029968	0.448781	SOX11, MYF5, HOXB7, HOXB4, HOXB2, HOXB5, AR, MYF6, HOXB3, SIX4, TBX1, PITX3, MYOD1, RREB1, SIX1, SMAD1, TFDP2, DLX3	MEOX2, GLI2, KLF4, MEIS3, CREB3L2, EBF2, TBX18, EBF1, TBX2, DLX2, FOXF2
bMyo vs bMes	MF	Up	GO:0016247	channel regulator activity	83	9	4	0.000125971	0.0718972	0.0345826	0.819636	NEDD4L, RASA1, SLC9A3R1, PACSIN3, VAMP8, WNK3, SNTA1, ITPR1, STIM2	KCNE4, ABCC9, WNK4, PRKG1
bMyo vs bMes	MF	Up	GO:0003779	actin binding	345	19	6	0.000516282	0.64943	0.0859796	1	MARCKSL1, PDLIM3, CNN3, ENAH, ANTXR1, CORO7, FMNL1, PALLD, LSP1, SHTN1, TLN2, MTSS1, FMN1, MYLK, SNTA1, PPP1R9A, EZR, SYNE2, ENC1	FERMT2, FGD4, EPB41L3, ADD3, FHOD1, PDLIM1
bMyo vs bMes	MF	Up	GO:0019870	potassium channel inhibitor activity	8	3	1	0.000723673	0.147558	0.10731	1	NEDD4L, RASA1, WNK3	WNK4
bMyo vs bMes	MF	Up	GO:0099106	ion channel regulator activity	69	7	4	0.00108678	0.041804	0.1443	0.62353	NEDD4L, RASA1, PACSIN3, VAMP8, WNK3, ITPR1, STIM2	KCNE4, ABCC9, WNK4, PRKG1
bMyo vs bMes	MF	Up	GO:0046875	ephrin receptor binding	23	4	0	0.00186361	1	0.204645	1	CHN1, LYN, SIPA1L1, EFNB2
bMyo vs bMes	MF	Up	GO:0017081	chloride channel regulator activity	12	3	1	0.00259197	0.21163	0.249554	1	SLC9A3R1, VAMP8, WNK3	WNK4
bMyo vs bMes	MF	Up	GO:0022836	gated channel activity	129	9	7	0.00279622	0.0103105	0.262987	0.343028	CLIC4, SCN5A, KCNN3, JPH2, CHRNA1, TMC6, ITPR1, GABRB2, P2RX6	CACNA1C, GRIA1, FAM155A, KCNE4, KCNK2, KCNJ8, CACNA2D1
bMyo vs bMes	MF	Up	GO:0005501	retinoid binding	13	3	0	0.00296667	1	0.272705	1	RBP1, CYP26B1, PTGDS
bMyo vs bMes	MF	Up	GO:0015276	ligand-gated ion channel activity	46	5	2	0.00366519	0.207294	0.305157	1	JPH2, CHRNA1, ITPR1, GABRB2, P2RX6	GRIA1, KCNJ8
bMyo vs bMes	MF	Up	GO:0022834	ligand-gated channel activity	46	5	2	0.00366519	0.207294	0.305157	1	JPH2, CHRNA1, ITPR1, GABRB2, P2RX6	GRIA1, KCNJ8
bMyo vs bMes	MF	Up	GO:0019840	isoprenoid binding	14	3	0	0.00370645	1	0.307333	1	RBP1, CYP26B1, PTGDS
bMyo vs bMes	MF	Up	GO:0050840	extracellular matrix binding	47	5	6	0.00416412	0.000217284	0.326618	0.0428841	OLFML2A, TGFBI, ITGA6, PLEKHA2, ITGA3	CD248, SLIT2, BGN, COL11A1, TINAGL1, LRRC15
bMyo vs bMes	MF	Up	GO:0001786	phosphatidylserine binding	34	4	0	0.00787645	1	0.495387	1	TRIM72, SYT15, JPH2, MME
bMyo vs bMes	MF	Up	GO:0005516	calmodulin binding	148	9	7	0.00798168	0.0230644	0.498916	0.476172	MARCKSL1, CNN3, SCN5A, KCNN3, RGS16, FBXL2, ATP2B1, MYLK, SNTA1	PDE1A, PLCB1, CACNA1C, SPHK1, ADD3, CAMK1, AEBP1
bMyo vs bMes	MF	Up	GO:0030547	receptor inhibitor activity	19	3	1	0.00844953	0.297212	0.516715	1	DKK3, LYPD6, IGSF1	FST
bMyo vs bMes	MF	Up	GO:0001223	transcription coactivator binding	18	3	0	0.00854638	1	0.516715	1	TEAD2, SIX1, FOXO1
bMyo vs bMes	MF	Down	GO:0005201	extracellular matrix structural constituent	113	4	22	0.264105	1.22385e-16	1	1.24313e-12	COL18A1, TGFBI, FBN2, FBLN1	TNXB, PRG4, ABI3BP, COL9A3, BGN, POSTN, FBN1, COL16A1, HMCN1, PCOLCE, TFPI2, LAMA4, COL11A1, COL6A3, COL22A1, LAMC2, TINAGL1, LTBP1, THSD4, COL6A1, LAMA1, AEBP1
bMyo vs bMes	MF	Down	GO:0005125	cytokine activity	87	3	15	0.322866	5.67962e-11	1	1.92302e-07	CSF1, SECTM1, CSF3	BMP6, KITLG, CXCL5, TIMP1, CD70, FGF2, IL6, CXCL3, CCL2, CXCL8, AREG, INHBA, CXCL2, IL33, IL11
bMyo vs bMes	MF	Down	GO:0048018	receptor ligand activity	200	5	21	0.494386	1.50578e-10	1	4.37e-07	MDK, SEMA4C, CSF1, SECTM1, CSF3	BMP6, PENK, KITLG, HGF, FBN1, CXCL5, TIMP1, CD70, SEMA5A, FGF2, CDC42EP2, IL6, CXCL3, CCL2, CXCL8, AREG, INHBA, CXCL2, NGF, IL33, IL11
bMyo vs bMes	MF	Down	GO:0030545	receptor regulator activity	225	8	22	0.150728	2.0866e-10	1	4.98801e-07	MDK, SEMA4C, DKK3, LYPD6, CSF1, SECTM1, CSF3, IGSF1	BMP6, PENK, KITLG, HGF, FBN1, CXCL5, TIMP1, CD70, FST, SEMA5A, FGF2, CDC42EP2, IL6, CXCL3, CCL2, CXCL8, AREG, INHBA, CXCL2, NGF, IL33, IL11
bMyo vs bMes	MF	Down	GO:0030546	signaling receptor activator activity	204	5	21	0.512702	2.2098e-10	1	4.98801e-07	MDK, SEMA4C, CSF1, SECTM1, CSF3	BMP6, PENK, KITLG, HGF, FBN1, CXCL5, TIMP1, CD70, SEMA5A, FGF2, CDC42EP2, IL6, CXCL3, CCL2, CXCL8, AREG, INHBA, CXCL2, NGF, IL33, IL11
bMyo vs bMes	MF	Down	GO:0008201	heparin binding	96	2	15	0.654109	2.82497e-10	1	5.73893e-07	MDK, PTPRF	TNXB, PCOLCE2, ABI3BP, LXN, TGFBR3, SLIT2, SFRP1, POSTN, FBN1, PCOLCE, COL11A1, FGF2, FSTL1, LAMC2, CCDC80
bMyo vs bMes	MF	Down	GO:0005539	glycosaminoglycan binding	130	2	17	0.805483	3.12047e-10	1	5.76294e-07	MDK, PTPRF	TNXB, PCOLCE2, ABI3BP, LXN, TGFBR3, SLIT2, BGN, SFRP1, POSTN, FBN1, PCOLCE, SEMA5A, COL11A1, FGF2, FSTL1, LAMC2, CCDC80
bMyo vs bMes	MF	Down	GO:1901681	sulfur compound binding	162	2	18	0.893156	1.52273e-09	1	2.57785e-06	MDK, PTPRF	TNXB, PCOLCE2, ABI3BP, LXN, TGFBR3, SLIT2, MGST1, SFRP1, POSTN, FBN1, PCOLCE, FST, SEMA5A, COL11A1, FGF2, FSTL1, LAMC2, CCDC80
bMyo vs bMes	MF	Down	GO:0005198	structural molecule activity	489	14	28	0.249814	1.74013e-07	1	0.000196393	PDLIM3, DES, TUBA1A, TUBA4A, CSRP2, COL18A1, TLN2, TGFBI, JUP, SNTA1, TUBB2B, FBN2, FBLN1, LCE3A	TNXB, PRG4, ABI3BP, COL9A3, BGN, POSTN, FBN1, COL16A1, HMCN1, PCOLCE, TFPI2, HSPB6, DSP, LAMA4, COL11A1, COL6A3, COL22A1, EPB41L3, ADD3, LAMC2, HMGA1, TINAGL1, LTBP1, THSD4, ANKRD2, COL6A1, LAMA1, AEBP1
bMyo vs bMes	MF	Down	GO:0005126	cytokine receptor binding	149	2	14	0.866118	9.09222e-07	1	0.000659673	CSF1, CSF3	BMP6, TGFBR3, KITLG, CXCL5, CD70, ITGA5, IL6, CXCL3, CCL2, CXCL8, INHBA, CXCL2, NGF, IL11
bMyo vs bMes	MF	Down	GO:0038023	signaling receptor activity	465	18	25	0.0209359	1.93237e-06	0.783384	0.00122675	TNFRSF1B, AR, SORT1, EPHB4, ANTXR1, MET, EVI2A, PTPRF, CHRNA1, L1CAM, IL21R, DDR1, PTK7, GABRB2, IL17RD, IGSF1, P2RX6, NLGN4X	ADGRL2, TGFBR3, PDGFRA, PTGIR, NLGN1, IL17RC, PROCR, IL1RL1, SLC1A5, GRIA1, CCR10, CNTNAP1, HMCN1, GPR4, ABCC9, PDGFRB, SPHK1, PPARG, NPR3, PVR, S1PR2, F2RL2, PEAR1, NOTCH3, LTBP1
bMyo vs bMes	MF	Down	GO:0060089	molecular transducer activity	465	18	25	0.0209359	1.93237e-06	0.783384	0.00122675	TNFRSF1B, AR, SORT1, EPHB4, ANTXR1, MET, EVI2A, PTPRF, CHRNA1, L1CAM, IL21R, DDR1, PTK7, GABRB2, IL17RD, IGSF1, P2RX6, NLGN4X	ADGRL2, TGFBR3, PDGFRA, PTGIR, NLGN1, IL17RC, PROCR, IL1RL1, SLC1A5, GRIA1, CCR10, CNTNAP1, HMCN1, GPR4, ABCC9, PDGFRB, SPHK1, PPARG, NPR3, PVR, S1PR2, F2RL2, PEAR1, NOTCH3, LTBP1
bMyo vs bMes	MF	Down	GO:0008083	growth factor activity	84	3	10	0.311896	4.06521e-06	1	0.00206462	MDK, CSF1, CSF3	BMP6, KITLG, HGF, TIMP1, FGF2, IL6, AREG, INHBA, NGF, IL11
bMyo vs bMes	MF	Down	GO:0008009	chemokine activity	15	0	5	1	5.78807e-06	1	0.00286792		CXCL5, CXCL3, CCL2, CXCL8, CXCL2
bMyo vs bMes	MF	Down	GO:0070851	growth factor receptor binding	84	3	9	0.317034	3.16561e-05	1	0.0107182	SLC9A3R1, LYN, CSF3	PDGFRA, ITGA5, PDGFRB, FGF2, SOCS5, IL6, ESM1, AREG, IL11
bMyo vs bMes	MF	Down	GO:0042379	chemokine receptor binding	21	0	5	1	3.66021e-05	1	0.0118027		CXCL5, CXCL3, CCL2, CXCL8, CXCL2
bMyo vs bMes	MF	Down	GO:0061134	peptidase regulator activity	111	2	10	0.727193	4.25182e-05	1	0.0128919	CST6, FBLN1	PCOLCE2, LXN, PCOLCE, TFPI2, TIMP1, COL6A3, CTSC, TIMP3, NGF, CASP1
bMyo vs bMes	MF	Down	GO:0005518	collagen binding	52	4	7	0.0308226	4.6739e-05	0.894515	0.0137609	ANTXR1, TGFBI, DDR1, ITGA3	PCOLCE2, ABI3BP, PCOLCE, CTSK, CTSL, LRRC15, AEBP1
bMyo vs bMes	MF	Down	GO:0008191	metalloendopeptidase inhibitor activity	12	0	4	1	5.06648e-05	1	0.0147036		LXN, TIMP1, TIMP3, NGF
bMyo vs bMes	MF	Down	GO:0001968	fibronectin binding	23	3	5	0.0153595	5.75882e-05	0.715661	0.0162487	PLEKHA2, FBLN1, ITGA3	LOXL3, CTSK, CCDC80, CTSL, LRRC15
bMyo vs bMes	KEGG	Up	hsa05202	Transcriptional misregulation in cancer	146	11	5	0.000560746	0.245979	0.188411	0.712492	NFKBIZ, PAX7, PAX3, SIX4, MET, SIX1, PLAU, SMAD1, JUP, FOXO1, GADD45A	RUNX1T1, PPARG, IL6, CXCL8, BCL2A1
bMyo vs bMes	KEGG	Up	hsa04640	Hematopoietic cell lineage	35	5	5	0.00122401	0.00113838	0.205633	0.0294228	CSF1, ITGA6, CSF3, MME, ITGA3	KITLG, ITGA5, CD59, IL6, IL11
bMyo vs bMes	KEGG	Up	hsa05412	Arrhythmogenic right ventricular cardiomyopathy	60	6	5	0.00263703	0.0120275	0.295347	0.112257	DES, SGCA, ITGA7, JUP, ITGA6, ITGA3	CACNA1C, DSP, ITGA5, LAMA1, CACNA2D1
bMyo vs bMes	KEGG	Up	hsa05410	Hypertrophic cardiomyopathy	69	6	5	0.00521875	0.0206967	0.353814	0.149294	DES, SGCA, ITGA7, ACTC1, ITGA6, ITGA3	CACNA1C, ITGA5, IL6, LAMA1, CACNA2D1
bMyo vs bMes	KEGG	Up	hsa05414	Dilated cardiomyopathy	69	6	4	0.00526508	0.0740138	0.353814	0.340666	DES, SGCA, ITGA7, ACTC1, ITGA6, ITGA3	CACNA1C, ITGA5, LAMA1, CACNA2D1
bMyo vs bMes	KEGG	Up	hsa04360	Axon guidance	153	9	4	0.00968773	0.47704	0.542513	0.983346	SEMA4C, RASA1, EPHB4, ENAH, RGS3, MET, L1CAM, EFNB2, PARD6G	SLIT2, NFATC4, SEMA5A, SRGAP1
bMyo vs bMes	KEGG	Up	hsa04514	Cell adhesion molecules	86	6	4	0.0166874	0.144884	0.711034	0.508856	CDH15, NCAM1, PTPRF, L1CAM, ITGA6, NLGN4X	NLGN1, NEGR1, CNTNAP1, PVR
bMyo vs bMes	KEGG	Up	hsa04611	Platelet activation	89	6	7	0.0169294	0.00403751	0.711034	0.0589827	FERMT3, TLN2, VAMP8, LYN, MYLK, ITPR1	PLA2G4A, PTGS1, PLCB1, APBB1IP, PTGIR, PRKG1, MAPK13
bMyo vs bMes	KEGG	Up	hsa00260	Glycine, serine and threonine metabolism	25	3	1	0.0200731	0.444147	0.749396	0.940156	SARDH, GATM, ALDH7A1	GCAT
bMyo vs bMes	KEGG	Up	hsa00220	Arginine biosynthesis	13	2	0	0.036217	1	1	1	GLS, ASS1
bMyo vs bMes	KEGG	Up	hsa01230	Biosynthesis of amino acids	57	4	0	0.0408554	1	1	1	MAT2A, IDH2, ENO3, ASS1
bMyo vs bMes	KEGG	Up	hsa04540	Gap junction	63	4	4	0.0572857	0.0545834	1	0.277879	TUBA1A, TUBA4A, ITPR1, TUBB2B	PLCB1, PDGFRA, PDGFRB, PRKG1
bMyo vs bMes	KEGG	Up	hsa04530	Tight junction	123	6	0	0.0655604	1	1	1	NEDD4L, TUBA1A, TUBA4A, SLC9A3R1, EZR, PARD6G
bMyo vs bMes	KEGG	Up	hsa00471	D-Glutamine and D-glutamate metabolism	3	1	0	0.0688896	1	1	1	GLS
bMyo vs bMes	KEGG	Up	hsa04971	Gastric acid secretion	43	3	3	0.0780749	0.0751706	1	0.341315	MYLK, ITPR1, EZR	PLCB1, KCNK2, CA2
bMyo vs bMes	KEGG	Up	hsa04015	Rap1 signaling pathway	159	7	9	0.0792911	0.0108565	1	0.104222	ENAH, CSF1, TLN2, MET, SIPA1L1, ID1, PARD6G	PLCB1, APBB1IP, PDGFRA, KITLG, HGF, PDGFRB, FGF2, NGF, MAPK13
bMyo vs bMes	KEGG	Up	hsa04727	GABAergic synapse	48	3	2	0.105764	0.311396	1	0.775238	GLS, GNG2, GABRB2	CACNA1C, GNG11
bMyo vs bMes	KEGG	Up	hsa00250	Alanine, aspartate and glutamate metabolism	24	2	0	0.10743	1	1	1	GLS, ASS1
bMyo vs bMes	KEGG	Up	hsa04350	TGF-beta signaling pathway	78	4	6	0.108098	0.00863793	1	0.093624	TGIF2, SMAD1, ID1, SMAD9	BMP6, FBN1, FST, INHBA, LTBP1, THSD4
bMyo vs bMes	KEGG	Up	hsa04210	Apoptosis	115	5	5	0.128697	0.122479	1	0.467646	TUBA1A, TUBA4A, CTSD, ITPR1, GADD45A	CTSK, CTSC, CTSL, NGF, BCL2A1
bMyo vs bMes	KEGG	Down	hsa04060	Cytokine-cytokine receptor interaction	116	4	15	0.307969	6.82945e-08	1	2.2947e-05	TNFRSF1B, CSF1, IL21R, CSF3	BMP6, IL17RC, IL1RL1, CCR10, CXCL5, CD70, IL6, CXCL3, CCL2, CXCL8, INHBA, CXCL2, NGF, IL33, IL11
bMyo vs bMes	KEGG	Down	hsa05323	Rheumatoid arthritis	52	1	10	0.711781	2.13022e-07	1	3.08256e-05	CSF1	MMP1, CXCL5, CTSK, CTSL, IL6, CXCL3, CCL2, CXCL8, CXCL2, IL11
bMyo vs bMes	KEGG	Down	hsa04657	IL-17 signaling pathway	67	1	11	0.798549	2.75229e-07	1	3.08256e-05	CSF3	MMP1, IL17RC, CXCL5, PTGS2, IL6, CXCL3, CCL2, CXCL8, CXCL2, MAPK13, TNFAIP3
bMyo vs bMes	KEGG	Down	hsa04151	PI3K-Akt signaling pathway	257	7	20	0.395993	1.22818e-06	1	0.000103167	ITGA7, CSF1, MET, ITGA6, GNG2, CSF3, ITGA3	TNXB, PDGFRA, COL9A3, KITLG, HGF, CREB3L2, LAMA4, ITGA5, PDGFRB, FGF2, COL6A3, RELN, LAMC2, IL6, AREG, NGF, CREB5, GNG11, COL6A1, LAMA1
bMyo vs bMes	KEGG	Down	hsa04061	Viral protein interaction with cytokine and cytokine receptor	33	2	7	0.18714	8.85892e-06	1	0.000595319	TNFRSF1B, CSF1	CCR10, CXCL5, IL6, CXCL3, CCL2, CXCL8, CXCL2
bMyo vs bMes	KEGG	Down	hsa04512	ECM-receptor interaction	64	3	9	0.19159	1.37878e-05	1	0.000772116	ITGA7, ITGA6, ITGA3	TNXB, COL9A3, LAMA4, ITGA5, COL6A3, RELN, LAMC2, COL6A1, LAMA1
bMyo vs bMes	KEGG	Down	hsa04668	TNF signaling pathway	97	2	10	0.674252	7.35723e-05	1	0.00353147	TNFRSF1B, CSF1	CREB3L2, CXCL5, PTGS2, IL6, CXCL3, CCL2, CXCL2, MAPK13, CREB5, TNFAIP3
bMyo vs bMes	KEGG	Down	hsa05146	Amoebiasis	64	0	8	1	9.47291e-05	1	0.00371118		PLCB1, LAMA4, LAMC2, IL6, CXCL3, CXCL8, CXCL2, LAMA1
bMyo vs bMes	KEGG	Down	hsa04974	Protein digestion and absorption	48	2	7	0.311632	9.94066e-05	1	0.00371118	COL18A1, MME	COL9A3, SLC1A5, COL11A1, COL6A3, COL22A1, SLC1A1, COL6A1
bMyo vs bMes	KEGG	Down	hsa05200	Pathways in cancer	404	9	21	0.609923	0.000297823	1	0.0100069	MGST2, AR, MET, JUP, ITGA6, FOXO1, GNG2, GADD45A, ITGA3	PLCB1, MMP1, PDGFRA, GLI2, MGST1, RUNX1T1, KITLG, HGF, LAMA4, PDGFRB, FGF2, HHIP, PTGS2, LAMC2, PPARG, IL6, CXCL8, NOTCH3, GNG11, LAMA1, BCR
bMyo vs bMes	KEGG	Down	hsa04510	Focal adhesion	172	6	12	0.20705	0.000489613	1	0.0149554	ITGA7, TLN2, MET, MYLK, ITGA6, ITGA3	TNXB, PDGFRA, COL9A3, HGF, LAMA4, ITGA5, PDGFRB, COL6A3, RELN, LAMC2, COL6A1, LAMA1
bMyo vs bMes	KEGG	Down	hsa05133	Pertussis	49	0	6	1	0.000807245	1	0.0226029		CXCL5, ITGA5, IL6, CXCL8, MAPK13, CASP1
bMyo vs bMes	KEGG	Down	hsa04640	Hematopoietic cell lineage	35	5	5	0.00122401	0.00113838	0.205633	0.0294228	CSF1, ITGA6, CSF3, MME, ITGA3	KITLG, ITGA5, CD59, IL6, IL11
bMyo vs bMes	KEGG	Down	hsa04726	Serotonergic synapse	54	3	6	0.134194	0.00144141	1	0.0345939	ITPR1, GNG2, GABRB2	PLA2G4A, PTGS1, PLCB1, CACNA1C, PTGS2, GNG11
bMyo vs bMes	KEGG	Down	hsa05163	Human cytomegalovirus infection	171	2	11	0.912853	0.00171928	1	0.0385119	ITPR1, GNG2	PLCB1, PDGFRA, CREB3L2, NFATC4, PTGS2, IL6, CCL2, CXCL8, MAPK13, CREB5, GNG11
bMyo vs bMes	KEGG	Down	hsa04927	Cortisol synthesis and secretion	40	1	5	0.618136	0.00217302	1	0.0435457	ITPR1	PLCB1, CACNA1C, CREB3L2, KCNK2, CREB5
bMyo vs bMes	KEGG	Down	hsa04621	NOD-like receptor signaling pathway	125	4	9	0.335785	0.0022032	1	0.0435457	ANTXR1, GBP2, ITPR1, GBP5	PLCB1, IL6, CXCL3, CCL2, CXCL8, CXCL2, MAPK13, CASP1, TNFAIP3
bMyo vs bMes	KEGG	Down	hsa05165	Human papillomavirus infection	264	7	14	0.420147	0.00270581	1	0.0498325	SLC9A3R1, ITGA7, ITGA6, FOXO1, PARD6G, LFNG, ITGA3	TNXB, COL9A3, CREB3L2, LAMA4, ITGA5, PDGFRB, COL6A3, RELN, PTGS2, LAMC2, NOTCH3, CREB5, COL6A1, LAMA1
bMyo vs bMes	KEGG	Down	hsa05134	Legionellosis	43	0	5	1	0.00281791	1	0.0498325		IL6, CXCL3, CXCL8, CXCL2, CASP1
bMyo vs bMes	KEGG	Down	hsa05144	Malaria	27	2	4	0.135441	0.00337496	1	0.054464	MET, CSF3	HGF, IL6, CCL2, CXCL8

## Sheet: S1 vs S2A
Supplementary file 2. Top 20 Up and Down GO terms (BP, CC, MF) and KEGG pathways for pairwise cell type comparisons. Terms comprising N (< 500) genes are sorted by P.Up and P.Down. For each term, the top Genes.Up and Genes.Down are listed.
Comparison	Ont	Dir	GO/KEGG ID	GO Term / KEGG Pathway (top 20 Up and Down)	N	Up	Down	P.Up	P.Down	FDR.Up	FDR.Down	Genes.Up (limited to a maximum of the top 30 Up genes)	Genes.Down (limited to a maximum of the top 30 Down genes)
S1 vs S2A	BP	Up	GO:0042254	ribosome biogenesis	283	37	0	1.4922e-19	1	1.52683e-15	1	NPM1, NOP56, WDR43, LYAR, MDN1, RRP1B, UTP20, FBL, RSL1D1, PDCD11, EBNA1BP2, RRP9, NOLC1, PA2G4, PES1, DDX21, MRTO4, ABCE1, DKC1, PAK1IP1, UTP18, BOP1, NAT10, TSR1, TEX10, GTPBP4, WDR12, C1QBP, NOC2L, WDR3
S1 vs S2A	BP	Up	GO:0034660	ncRNA metabolic process	438	43	1	1.50315e-19	0.999999	1.52683e-15	1	NOP56, WDR43, LIN28A, LYAR, MDN1, PPA1, RRP1B, UTP20, FBL, TARS, SEPHS1, RSL1D1, PDCD11, PUS7, EBNA1BP2, RRP9, METTL2B, NOLC1, PA2G4, PES1, DDX21, MRTO4, DKC1, UTP18, BOP1, NAT10, TSR1, XPO5, TEX10, GTPBP4	XRN1
S1 vs S2A	BP	Up	GO:0022613	ribonucleoprotein complex biogenesis	408	41	0	2.82662e-17	1	1.91409e-13	1	NPM1, SRPK1, WDR77, NOP56, WDR43, LYAR, MDN1, RRP1B, UTP20, FBL, RSL1D1, PDCD11, EBNA1BP2, RRP9, NOLC1, PA2G4, PES1, DDX21, MRTO4, GEMIN5, RUVBL1, ABCE1, DKC1, PAK1IP1, UTP18, BOP1, NAT10, TSR1, TEX10, GTPBP4
S1 vs S2A	BP	Up	GO:0034470	ncRNA processing	362	36	0	1.95198e-16	1	8.92421e-13	1	NOP56, WDR43, LIN28A, LYAR, MDN1, RRP1B, UTP20, FBL, SEPHS1, RSL1D1, PDCD11, PUS7, EBNA1BP2, RRP9, METTL2B, NOLC1, PA2G4, PES1, DDX21, MRTO4, DKC1, UTP18, BOP1, NAT10, TSR1, TEX10, GTPBP4, WDR12, POLR3K, WDR3
S1 vs S2A	BP	Up	GO:0006364	rRNA processing	207	29	0	2.19646e-16	1	8.92421e-13	1	NOP56, WDR43, LYAR, MDN1, RRP1B, UTP20, FBL, RSL1D1, PDCD11, EBNA1BP2, RRP9, NOLC1, PA2G4, PES1, DDX21, MRTO4, DKC1, UTP18, BOP1, NAT10, TSR1, TEX10, GTPBP4, WDR12, WDR3, RRP1, EXOSC2, EXOSC8, RRS1
S1 vs S2A	BP	Up	GO:0016072	rRNA metabolic process	215	29	1	5.33696e-16	0.999301	1.807e-12	1	NOP56, WDR43, LYAR, MDN1, RRP1B, UTP20, FBL, RSL1D1, PDCD11, EBNA1BP2, RRP9, NOLC1, PA2G4, PES1, DDX21, MRTO4, DKC1, UTP18, BOP1, NAT10, TSR1, TEX10, GTPBP4, WDR12, WDR3, RRP1, EXOSC2, EXOSC8, RRS1	XRN1
S1 vs S2A	BP	Up	GO:0042273	ribosomal large subunit biogenesis	67	15	0	1.79388e-11	1	4.55534e-08	1	NPM1, MDN1, RSL1D1, EBNA1BP2, PES1, MRTO4, PAK1IP1, BOP1, GTPBP4, WDR12, NOC2L, RRS1, NOP16, BRIX1, NLE1
S1 vs S2A	BP	Up	GO:0000466	maturation of 5.8S rRNA from tricistronic rRNA transcript (SSU-rRNA, 5.8S rRNA, LSU-rRNA)	22	7	0	2.17858e-07	1	0.000402345	1	UTP20, PES1, BOP1, WDR12, EXOSC2, EXOSC8, RRS1
S1 vs S2A	BP	Up	GO:0000460	maturation of 5.8S rRNA	27	7	0	1.08804e-06	1	0.00170028	1	UTP20, PES1, BOP1, WDR12, EXOSC2, EXOSC8, RRS1
S1 vs S2A	BP	Up	GO:0006403	RNA localization	215	17	2	2.50147e-06	0.994187	0.00352417	1	LRPPRC, CCT2, NPM1, EIF5A, FBL, CCT5, IGF2BP1, ZNF385A, RUVBL1, ABCE1, POM121, DKC1, POM121C, XPO5, PNPT1, EXOSC2, RRS1	MVP, TGFBR2
S1 vs S2A	BP	Up	GO:0006417	regulation of translation	305	19	4	1.14051e-05	0.988417	0.0117235	1	LRPPRC, NPM1, EIF5A, LIN28A, TRAP1, TCOF1, NCL, HNRNPD, PUS7, NOLC1, PA2G4, IGF2BP1, GEMIN5, ZNF385A, NAT10, C1QBP, SHMT2, EIF4EBP1, TRIM71	XRN1, PINK1, IGFBP5, PRR16
S1 vs S2A	BP	Up	GO:0001649	osteoblast differentiation	173	13	11	1.15418e-05	0.00897836	0.0117235	0.427156	HSPE1, AXIN2, FASN, FBL, TNC, RSL1D1, DDX21, LEF1, PTCH1, GTPBP4, ESRRA, ID1, FBXO5	ITGA11, NBR1, CEBPD, NPNT, IL6ST, IGFBP5, IGFBP3, SFRP1, FAM20C, TCIRG1, IGF2.1
S1 vs S2A	BP	Up	GO:0006399	tRNA metabolic process	181	13	0	1.85166e-05	1	0.0170984	1	PPA1, TARS, SEPHS1, PUS7, METTL2B, NAT10, YARS, POLR3K, EXOSC2, EXOSC8, POP1, QRSL1, TRMT6
S1 vs S2A	BP	Up	GO:0042790	nucleolar large rRNA transcription by RNA polymerase I	17	5	0	2.249e-05	1	0.0198646	1	SMARCA4, TCOF1, NCL, CD3EAP, POLR1E
S1 vs S2A	BP	Up	GO:0000027	ribosomal large subunit assembly	27	6	0	2.55487e-05	1	0.0216259	1	MDN1, MRTO4, BOP1, RRS1, BRIX1, NLE1
S1 vs S2A	BP	Up	GO:0042255	ribosome assembly	55	8	0	2.86437e-05	1	0.0232759	1	NPM1, MDN1, MRTO4, BOP1, C1QBP, RRS1, BRIX1, NLE1
S1 vs S2A	BP	Up	GO:0034248	regulation of cellular amide metabolic process	348	19	6	5.27525e-05	0.961273	0.041218	1	LRPPRC, NPM1, EIF5A, LIN28A, TRAP1, TCOF1, NCL, HNRNPD, PUS7, NOLC1, PA2G4, IGF2BP1, GEMIN5, ZNF385A, NAT10, C1QBP, SHMT2, EIF4EBP1, TRIM71	TNFRSF1A, XRN1, PINK1, IGFBP5, PRR16, PDK2
S1 vs S2A	BP	Up	GO:0006458	'de novo' protein folding	35	6	1	6.21967e-05	0.677482	0.0451259	1	HSPE1, HSPD1, CCT2, HSPH1, DNAJC2, HSPA9	DNAJB4
S1 vs S2A	BP	Up	GO:0000469	cleavage involved in rRNA processing	22	5	0	8.60503e-05	1	0.0602797	1	UTP20, BOP1, EXOSC2, EXOSC8, RRS1
S1 vs S2A	BP	Up	GO:0061077	chaperone-mediated protein folding	52	7	1	9.25208e-05	0.824201	0.062652	1	HSPE1, CCT2, TRAP1, CHORDC1, HSPH1, FKBP4, HSPA9	DNAJB4
S1 vs S2A	BP	Down	GO:0030198	extracellular matrix organization	269	3	31	0.821025	1.9541e-12	1	1.01585e-08	TNC, LAMA1, GFOD2	EFEMP2, ITGA11, CST3, LOXL1, ENG, FBN1, TNFRSF1A, COL8A1, CD47, NPNT, SPARC, COL6A2, SPINT2, LOXL4, COL5A2, FOXC2, HSPG2, FN1, TGFBI, COL13A1, MMP23B, TGFB1, DPP4, LAMB2, COL5A1, ITGB8, TIMP1, LOXL2, A2M, MATN3
S1 vs S2A	BP	Down	GO:0043062	extracellular structure organization	270	3	31	0.821405	2.00019e-12	1	1.01585e-08	TNC, LAMA1, GFOD2	EFEMP2, ITGA11, CST3, LOXL1, ENG, FBN1, TNFRSF1A, COL8A1, CD47, NPNT, SPARC, COL6A2, SPINT2, LOXL4, COL5A2, FOXC2, HSPG2, FN1, TGFBI, COL13A1, MMP23B, TGFB1, DPP4, LAMB2, COL5A1, ITGB8, TIMP1, LOXL2, A2M, MATN3
S1 vs S2A	BP	Down	GO:0045087	innate immune response	470	10	34	0.246138	5.74467e-08	1	0.000116703	SRPK1, F12, DDX21, ABCE1, AKAP8, C1QBP, SKP2, SHMT2, PSME3, POLR3K	CASP4, PSMB8, SERINC3, GRN, GSN, TMEM173, SPON2, MT2A, AXL, NLRP1, IFI35, PSME1, PARP9, JAK1, PARP14, BST2, CD47, SERPING1, IFITM2, LGALS3, TRIM38, HLA-E, IFIT1, GSDMD, IFI16, IFI6, C19orf66, TGFB1, WNT5A, PYCARD
S1 vs S2A	BP	Down	GO:0034340	response to type I interferon	67	2	11	0.311308	1.30994e-06	1	0.00241923	ABCE1, SHMT2	PSMB8, IFI35, JAK1, BST2, IFITM2, HLA-E, IFIT1, IFI6, C19orf66, WNT5A, STAT2
S1 vs S2A	BP	Down	GO:0032612	interleukin-1 production	57	0	9	1	3.26645e-06	1	0.00470351		NLRP1, S100A13, F2R, GSDMD, IFI16, ERRFI1, WNT5A, PYCARD, CARD16
S1 vs S2A	BP	Down	GO:0051607	defense response to virus	163	5	16	0.119774	3.47294e-06	1	0.00470351	DDX21, ABCE1, C1QBP, SKP2, POLR3K	BNIP3L, SERINC3, TMEM173, SPON2, PARP9, BST2, IFITM2, TRIM38, IFIT1, IFI16, IFI6, C19orf66, FAM111A, PYCARD, DTX3L, STAT2
S1 vs S2A	BP	Down	GO:0032651	regulation of interleukin-1 beta production	43	0	8	1	4.89917e-06	1	0.0055023		NLRP1, F2R, GSDMD, IFI16, ERRFI1, WNT5A, PYCARD, CARD16
S1 vs S2A	BP	Down	GO:0060337	type I interferon signaling pathway	63	1	10	0.653069	4.94289e-06	1	0.0055023	ABCE1	PSMB8, IFI35, JAK1, BST2, IFITM2, HLA-E, IFIT1, IFI6, WNT5A, STAT2
S1 vs S2A	BP	Down	GO:0071357	cellular response to type I interferon	63	1	10	0.653069	4.94289e-06	1	0.0055023	ABCE1	PSMB8, IFI35, JAK1, BST2, IFITM2, HLA-E, IFIT1, IFI6, WNT5A, STAT2
S1 vs S2A	BP	Down	GO:0045785	positive regulation of cell adhesion	275	4	21	0.646655	6.67108e-06	1	0.00638381	HSPD1, HSPH1, RAC3, C1QBP	LGALS1, COL8A1, TGFBR2, CD47, NPNT, IL6ST, ADAM9, TGM2, DYSF, FOXC2, HLA-E, FN1, SFRP1, CITED2, TGFB1, TRIOBP, DPP4, WNT5A, PYCARD, SDC4, IGF2.1
S1 vs S2A	BP	Down	GO:0007423	sensory organ development	371	7	24	0.312646	6.91331e-06	1	0.00638381	SMARCA4, NKD1, MSX1, LEF1, LAMA1, GABRB3, NECTIN1	CHRDL1, C12orf57, CEBPD, FBN1, SHROOM2, COL8A1, TGFBR2, SPARC, NTRK2, SKIL, COL5A2, FOXC2, FAT4, LRP10, ECE1, EFEMP1, TGFB1, TRIOBP, LAMB2, WNT5A, COL5A1, TCIRG1, SDC4, MAF
S1 vs S2A	BP	Down	GO:0052547	regulation of peptidase activity	277	7	22	0.214392	8.78617e-06	1	0.00776048	HSPE1, HSPD1, CYCS, UCHL5, LEF1, PSME3, NLE1	CASP4, PSMB8, GRN, SERPINB6, CST3, GSN, NLRP1, PSME1, BST2, PINK1, SERPING1, TNFSF15, CTSD, SPINT2, F2R, FN1, IFI16, IFI6, PYCARD, CARD16, TIMP1, A2M
S1 vs S2A	BP	Down	GO:0032611	interleukin-1 beta production	51	0	8	1	9.27467e-06	1	0.00785062		NLRP1, F2R, GSDMD, IFI16, ERRFI1, WNT5A, PYCARD, CARD16
S1 vs S2A	BP	Down	GO:0001501	skeletal system development	394	10	25	0.0824853	1.11044e-05	1	0.00867636	AXIN2, MTHFD1L, TCOF1, SP5, MSX1, ZNF385A, MCPH1, ESRRA, NLE1, DMRT2	ENG, SLC38A10, FBN1, TGFBR2, SPARC, COL6A2, COL5A2, FOXC2, TGFBI, COL13A1, NFIB, FAT4, ARID5B, EFEMP1, LRRC17, SFRP1, TGFB1, FAM20C, WNT5A, ITGB8, TIMP1, LOXL2, MATN3, MAF, IGF2.1
S1 vs S2A	BP	Down	GO:0032652	regulation of interleukin-1 production	48	0	8	1	1.27605e-05	1	0.00900302		NLRP1, F2R, GSDMD, IFI16, ERRFI1, WNT5A, PYCARD, CARD16
S1 vs S2A	BP	Down	GO:0001503	ossification	297	13	22	0.00148631	1.2852e-05	0.436103	0.00900302	HSPE1, AXIN2, FASN, FBL, TNC, RSL1D1, DDX21, LEF1, PTCH1, GTPBP4, ESRRA, ID1, FBXO5	CHRDL1, ITGA11, NBR1, SORT1, CEBPD, NPNT, IL6ST, SPARC, IGFBP5, COL5A2, FOXC2, EXT2, COL13A1, SRGN, IGFBP3, FAT4, SFRP1, TGFB1, FAM20C, WNT5A, TCIRG1, IGF2.1
S1 vs S2A	BP	Down	GO:0061448	connective tissue development	214	3	17	0.6264	1.34487e-05	1	0.009107	AXIN2, MSX1, ESRRA	SLC39A13, TGFBR2, PLA2G16, COL6A2, FOXC2, TGFBI, NFIB, ARID5B, EFEMP1, TGFB1, WNT5A, COL5A1, ITGB8, TIMP1, LOXL2, MATN3, MAF
S1 vs S2A	BP	Down	GO:0002576	platelet degranulation	91	0	12	1	1.64953e-05	1	0.0105435		LGALS3BP, SELENOP, SERPING1, SPARC, FN1, SRGN, TGFB1, CD9, ACTN2, TIMP1, A2M, IGF2.1
S1 vs S2A	BP	Down	GO:0048771	tissue remodeling	114	0	12	1	1.6608e-05	1	0.0105435		CST3, AXL, SEMA3C, TGM2, IGFBP5, FOXC2, F2R, TPP1, SFRP1, TGFB1, TCIRG1, TIMP1
S1 vs S2A	BP	Down	GO:0002698	negative regulation of immune effector process	78	1	10	0.704402	1.86548e-05	1	0.0111463	C1QBP	GRN, CD59, BST2, CD47, SERPING1, LGALS3, TRIM38, HLA-E, TGFB1, A2M
S1 vs S2A	CC	Up	GO:0030684	preribosome	73	18	0	8.9678e-15	1	2.60258e-11	1	NOP56, RRP1B, UTP20, FBL, RSL1D1, PDCD11, EBNA1BP2, RRP9, PES1, MRTO4, UTP18, BOP1, TSR1, WDR12, NOC2L, WDR3, RRP1, RRS1
S1 vs S2A	CC	Up	GO:0030687	preribosome, large subunit precursor	23	9	0	6.15652e-10	1	1.38966e-06	1	RRP1B, EBNA1BP2, PES1, MRTO4, BOP1, WDR12, NOC2L, RRP1, RRS1
S1 vs S2A	CC	Up	GO:0030686	90S preribosome	29	8	0	7.50254e-08	1	0.000152414	1	UTP20, RSL1D1, PES1, UTP18, BOP1, WDR12, NOC2L, WDR3
S1 vs S2A	CC	Up	GO:0001650	fibrillar center	119	13	3	3.3138e-07	0.688269	0.000560999	1	NOP56, WDR43, TCOF1, FBL, CD3EAP, POLR1E, NOLC1, MRPL23, DKC1, ESRRA, E2F5, RRS1, DCAF1	DAB2, NFIB, FAM111A
S1 vs S2A	CC	Up	GO:0031428	box C/D snoRNP complex	6	4	0	4.89262e-06	1	0.00621209	1	NOP56, FBL, RRP9, NOLC1
S1 vs S2A	CC	Up	GO:0005732	small nucleolar ribonucleoprotein complex	22	6	0	5.96747e-06	1	0.00713113	1	NOP56, FBL, RRP9, NOLC1, DKC1, POP1
S1 vs S2A	CC	Up	GO:0032040	small-subunit processome	36	7	0	7.96958e-06	1	0.00899455	1	NOP56, UTP20, FBL, PDCD11, RRP9, UTP18, WDR3
S1 vs S2A	CC	Up	GO:0070545	PeBoW complex	5	3	0	5.59758e-05	1	0.0421166	1	PES1, BOP1, WDR12
S1 vs S2A	CC	Up	GO:0030688	preribosome, small subunit precursor	14	4	0	0.000204373	1	0.115329	1	RRP1B, UTP20, TSR1, RRP1
S1 vs S2A	CC	Up	GO:0005736	RNA polymerase I complex	13	3	0	0.00253631	1	0.620785	1	CD3EAP, POLR1E, POLR1A
S1 vs S2A	CC	Up	GO:0000177	cytoplasmic exosome (RNase complex)	14	3	0	0.00261981	1	0.624945	1	PNPT1, EXOSC2, EXOSC8
S1 vs S2A	CC	Up	GO:0001652	granular component	4	2	0	0.00273041	1	0.624945	1	RRP1B, FBL
S1 vs S2A	CC	Up	GO:0032584	growth cone membrane	6	2	0	0.0037727	1	0.710221	1	GAP43, NECTIN1
S1 vs S2A	CC	Up	GO:0031429	box H/ACA snoRNP complex	5	2	0	0.00577203	1	0.846983	1	NOLC1, DKC1
S1 vs S2A	CC	Up	GO:0072588	box H/ACA RNP complex	5	2	0	0.00577203	1	0.846983	1	NOLC1, DKC1
S1 vs S2A	CC	Up	GO:0034388	Pwp2p-containing subcomplex of 90S preribosome	7	2	0	0.00591566	1	0.85298	1	UTP18, WDR3
S1 vs S2A	CC	Up	GO:0098982	GABA-ergic synapse	36	3	0	0.0105457	1	1	1	GAP43, GABRB3, C1QBP
S1 vs S2A	CC	Up	GO:0000178	exosome (RNase complex)	24	3	0	0.0127688	1	1	1	PNPT1, EXOSC2, EXOSC8
S1 vs S2A	CC	Up	GO:1905354	exoribonuclease complex	25	3	0	0.0143107	1	1	1	PNPT1, EXOSC2, EXOSC8
S1 vs S2A	CC	Up	GO:0005832	chaperonin-containing T-complex	9	2	0	0.0174208	1	1	1	CCT2, CCT5
S1 vs S2A	CC	Down	GO:0031012	extracellular matrix	310	4	38	0.747101	5.79303e-16	1	1.00787e-11	TNC, F12, LAMA1, GFOD2	LGALS3BP, EFEMP2, SERPINB6, LOXL1, SPON2, LGALS1, FBN1, COL8A1, SERPING1, NPNT, SPARC, CTSD, TGM2, COL6A2, COL5A2, LGALS3, MFGE8, HSPG2, FN1, TGFBI, LTBP2, COL13A1, MMP23B, EFEMP1, LRRC17, SFRP1, EGFL7, TGFB1, LAMB2, WNT5A
S1 vs S2A	CC	Down	GO:0062023	collagen-containing extracellular matrix	254	3	35	0.813425	9.92241e-16	1	1.00787e-11	TNC, F12, LAMA1	LGALS3BP, EFEMP2, SERPINB6, LOXL1, LGALS1, FBN1, COL8A1, SERPING1, NPNT, SPARC, CTSD, TGM2, COL6A2, COL5A2, LGALS3, MFGE8, HSPG2, FN1, TGFBI, LTBP2, COL13A1, MMP23B, EFEMP1, SFRP1, EGFL7, TGFB1, LAMB2, WNT5A, THBS2, LAD1
S1 vs S2A	CC	Down	GO:0009986	cell surface	444	2	35	0.992073	4.25672e-10	1	1.25284e-06	HSPD1, C1QBP	FCGRT, VAMP5, CLSTN2, SORT1, AXL, ENG, HEG1, LGALS1, CD59, TNFRSF1A, TGFBR2, BST2, CD47, ADGRF5, IL6ST, SPARC, ADAM9, LGALS3, HLA-E, MFGE8, F2R, LIFR, SMIM1, ECE1, SFRP1, EGFL7, TGFB1, CD9, PLAT, DPP4
S1 vs S2A	CC	Down	GO:0005604	basement membrane	72	2	15	0.339106	4.31696e-10	1	1.25284e-06	TNC, LAMA1	EFEMP2, LOXL1, FBN1, COL8A1, NPNT, SPARC, HSPG2, FN1, TGFBI, LAMB2, THBS2, LAD1, COL5A1, TIMP1, LOXL2
S1 vs S2A	CC	Down	GO:0005788	endoplasmic reticulum lumen	229	2	26	0.920302	1.16003e-09	1	2.94575e-06	TNC, NOTUM	CHRDL1, CST3, CERCAM, SIL1, DNAJB9, LGALS1, FBN1, COL8A1, H6PD, P4HA2, COL6A2, FSTL1, IGFBP5, COL5A2, MFGE8, FN1, COL13A1, IGFBP3, FAM20C, LAMB2, WNT5A, CASQ2, COL5A1, TIMP1, SUMF1, MATN3
S1 vs S2A	CC	Down	GO:0031091	platelet alpha granule	65	0	11	1	2.13327e-06	1	0.00361145		SERPING1, SPARC, FN1, SRGN, TGFB1, CD9, ACTN2, THBS2, TIMP1, A2M, IGF2.1
S1 vs S2A	CC	Down	GO:0031093	platelet alpha granule lumen	46	0	9	1	6.79554e-06	1	0.00638381		SERPING1, SPARC, FN1, SRGN, TGFB1, ACTN2, TIMP1, A2M, IGF2.1
S1 vs S2A	CC	Down	GO:0061702	inflammasome complex	7	0	4	1	1.25629e-05	1	0.00900302		CASP4, NLRP1, GSDMD, PYCARD
S1 vs S2A	CC	Down	GO:0009897	external side of plasma membrane	145	0	13	1	2.40676e-05	1	0.0135815		FCGRT, ENG, HEG1, CD59, TGFBR2, IL6ST, ADAM9, HLA-E, MFGE8, LIFR, ECE1, CD9, IL11RA
S1 vs S2A	CC	Down	GO:0070820	tertiary granule	101	1	12	0.841635	2.74145e-05	1	0.0142802	ATAD3B	YPEL5, SERPINB6, CST3, CD59, CD47, PGM1, CTSD, LGALS3, HGSNAT, GSDMD, TCIRG1, PTX3
S1 vs S2A	CC	Down	GO:0034774	secretory granule lumen	230	2	19	0.946372	0.000111964	1	0.037112	CCT2, PA2G4	LGALS3BP, GRN, GSN, MVP, SELENOP, SERPING1, SPARC, CTSD, DNASE1L1, FN1, GSDMD, SRGN, TGFB1, ACTN2, PYCARD, TIMP1, A2M, PTX3, IGF2.1
S1 vs S2A	CC	Down	GO:0060205	cytoplasmic vesicle lumen	232	2	19	0.948068	0.000124839	1	0.0396267	CCT2, PA2G4	LGALS3BP, GRN, GSN, MVP, SELENOP, SERPING1, SPARC, CTSD, DNASE1L1, FN1, GSDMD, SRGN, TGFB1, ACTN2, PYCARD, TIMP1, A2M, PTX3, IGF2.1
S1 vs S2A	CC	Down	GO:0031983	vesicle lumen	233	2	19	0.949028	0.000132846	1	0.0415196	CCT2, PA2G4	LGALS3BP, GRN, GSN, MVP, SELENOP, SERPING1, SPARC, CTSD, DNASE1L1, FN1, GSDMD, SRGN, TGFB1, ACTN2, PYCARD, TIMP1, A2M, PTX3, IGF2.1
S1 vs S2A	CC	Down	GO:0043235	receptor complex	232	2	14	0.782472	0.000185593	1	0.0502711	HSPD1, GABRB3	ITGA11, AXL, ENG, TM7SF2, TNFRSF1A, TGFBR2, NPNT, IL6ST, NTRK2, LOXL4, LIFR, RAMP1, ITGB8, IL11RA
S1 vs S2A	CC	Down	GO:0005859	muscle myosin complex	10	0	4	1	0.000205839	1	0.0522703		MYLPF, MYH3, MYL1, MYH7
S1 vs S2A	CC	Down	GO:0072562	blood microparticle	49	0	7	1	0.000388314	1	0.078886		LGALS3BP, GSN, ENG, SERPING1, FN1, TGFB1, A2M
S1 vs S2A	CC	Down	GO:1904724	tertiary granule lumen	36	0	6	1	0.000531782	1	0.0973257		YPEL5, CST3, PGM1, CTSD, GSDMD, PTX3
S1 vs S2A	CC	Down	GO:0016460	myosin II complex	13	0	4	1	0.000687415	1	0.121433		MYLPF, MYH3, MYL1, MYH7
S1 vs S2A	CC	Down	GO:0097179	protease inhibitor complex	3	0	2	1	0.000804798	1	0.129758		SERPINB6, CARD16
S1 vs S2A	CC	Down	GO:1904090	peptidase inhibitor complex	3	0	2	1	0.000804798	1	0.129758		SERPINB6, CARD16
S1 vs S2A	MF	Up	GO:0043021	ribonucleoprotein complex binding	128	13	0	2.60214e-06	1	0.00352417	1	NPM1, EIF5A, LIN28A, NME1, NAA15, NOLC1, PES1, GEMIN5, ABCE1, BOP1, XPO5, WDR12, C1QBP
S1 vs S2A	MF	Up	GO:0030515	snoRNA binding	26	6	0	1.61924e-05	1	0.0156642	1	NOP56, RRP9, NOLC1, DDX21, DKC1, TSR1
S1 vs S2A	MF	Up	GO:0003730	mRNA 3'-UTR binding	78	7	0	0.000941503	1	0.382533	1	HNRNPD, RSL1D1, CCT5, IGF2BP1, GEMIN5, ZNF385A, EXOSC8
S1 vs S2A	MF	Up	GO:0035198	miRNA binding	27	4	0	0.00135128	1	0.436103	1	LIN28A, DDX21, PNPT1, TRIM71
S1 vs S2A	MF	Up	GO:0051082	unfolded protein binding	105	8	7	0.0015022	0.0562165	0.436103	0.892914	HSPE1, HSPD1, CCT2, NPM1, TRAP1, MDN1, CCT5, HSPA9	SIL1, TAPBP, DNAJC4, PPIC, CCDC115, SCG5, DNAJB4
S1 vs S2A	MF	Up	GO:0003729	mRNA binding	216	12	0	0.00181542	1	0.505209	1	LIN28A, HNRNPAB, NCL, HNRNPD, RSL1D1, CCT5, IGF2BP1, GEMIN5, ZNF385A, XPO5, C1QBP, EXOSC8
S1 vs S2A	MF	Up	GO:0001054	RNA polymerase I activity	12	3	0	0.00191375	1	0.51837	1	CD3EAP, POLR1E, POLR1A
S1 vs S2A	MF	Up	GO:0048027	mRNA 5'-UTR binding	25	4	0	0.0027084	1	0.624945	1	NCL, RSL1D1, CCT5, IGF2BP1
S1 vs S2A	MF	Up	GO:0061980	regulatory RNA binding	33	4	0	0.00291803	1	0.630448	1	LIN28A, DDX21, PNPT1, TRIM71
S1 vs S2A	MF	Up	GO:0001042	RNA polymerase I core binding	5	2	0	0.00377572	1	0.710221	1	TCOF1, NOLC1
S1 vs S2A	MF	Up	GO:0140098	catalytic activity, acting on RNA	351	14	2	0.00394788	0.999538	0.713881	1	FBL, TARS, CD3EAP, POLR1E, METTL2B, DDX21, YARS, PNPT1, POLR1A, POLR3K, EXOSC2, POP1, QRSL1, TRMT6	XRN1, DDX60L
S1 vs S2A	MF	Up	GO:0016879	ligase activity, forming carbon-nitrogen bonds	40	4	1	0.00428288	0.655964	0.74016	1	MTHFD1L, PAICS, PFAS, QRSL1	TTLL7
S1 vs S2A	MF	Up	GO:0034511	U3 snoRNA binding	6	2	0	0.00533756	1	0.827729	1	RRP9, TSR1
S1 vs S2A	MF	Up	GO:0016779	nucleotidyltransferase activity	122	7	1	0.00543729	0.967111	0.830516	1	CD3EAP, POLR1E, DKC1, PNPT1, POLR1A, POLR3K, YRDC	ISPD
S1 vs S2A	MF	Up	GO:0034513	box H/ACA snoRNA binding	5	2	0	0.00577203	1	0.846983	1	NOLC1, DKC1
S1 vs S2A	MF	Up	GO:0043024	ribosomal small subunit binding	17	3	0	0.00579526	1	0.846983	1	NPM1, NME1, ABCE1
S1 vs S2A	MF	Up	GO:0002039	p53 binding	59	5	0	0.00592026	1	0.85298	1	SMARCA4, HSPD1, MSX1, ZNF385A, PSME3
S1 vs S2A	MF	Up	GO:0016874	ligase activity	124	7	1	0.00615236	0.969645	0.863715	1	MTHFD1L, PAICS, TARS, YARS, PFAS, QRSL1, MCCC2	TTLL7
S1 vs S2A	MF	Up	GO:0008139	nuclear localization sequence binding	21	3	0	0.0080592	1	1	1	NOLC1, POM121, POM121C
S1 vs S2A	MF	Up	GO:0003899	DNA-directed 5'-3' RNA polymerase activity	41	4	0	0.0086387	1	1	1	CD3EAP, POLR1E, POLR1A, POLR3K
S1 vs S2A	MF	Down	GO:0005201	extracellular matrix structural constituent	113	2	18	0.535662	3.3079e-10	1	1.25284e-06	TNC, LAMA1	EFEMP2, FBN1, COL8A1, NPNT, SPARC, COL6A2, COL5A2, MFGE8, HSPG2, FN1, TGFBI, LTBP2, COL13A1, EFEMP1, LAMB2, THBS2, COL5A1, MATN3
S1 vs S2A	MF	Down	GO:0005509	calcium ion binding	394	6	30	0.542208	1.60735e-08	1	3.62815e-05	NKD1, NCS1, F12, PCP4, CD320, SLIT2	EFEMP2, MYLPF, CLSTN2, GSN, MYL1, S100A13, HEG1, FBN1, EHD2, NPNT, FKBP9, SPARC, FSTL1, PCDH9, TNNC2, DYSF, P4HTM, HSPG2, LTBP2, FAT4, EFEMP1, EGFL7, FAM20C, ACTN2, CASQ2, THBS2, LOXL2, RASGRP2, MATN3, TNNT3
S1 vs S2A	MF	Down	GO:0005178	integrin binding	102	0	13	1	3.38609e-06	1	0.00470351		FBN1, NPNT, ADAM9, LGALS8, MFGE8, FN1, TGFBI, CD9, ACTN2, LAMB2, COL5A1, ITGB8, IGF2.1
S1 vs S2A	MF	Down	GO:0019838	growth factor binding	105	1	13	0.840545	5.14613e-06	1	0.0055023	API5	SORT1, ENG, S100A13, TGFBR2, IL6ST, NTRK2, IGFBP5, LTBP2, LIFR, IGFBP3, COL5A1, IL11RA, A2M
S1 vs S2A	MF	Down	GO:0061134	peptidase regulator activity	111	3	13	0.301361	9.80578e-06	1	0.00796817	UCHL5, LEF1, PSME3	SERPINB6, CST3, NLRP1, PSME1, BST2, PINK1, SERPING1, SPINT2, FN1, PYCARD, CARD16, TIMP1, A2M
S1 vs S2A	MF	Down	GO:0004888	transmembrane signaling receptor activity	345	2	18	0.877424	1.80445e-05	1	0.0111083	GABRB3, PTCH1	ITGA11, PDGFRL, SORT1, AXL, ENG, TNFRSF1A, TGFBR2, ADGRF5, IL6ST, NTRK2, OPN3, F2R, LIFR, EFEMP1, OXTR, RAMP1, IL11RA, GPR176
S1 vs S2A	MF	Down	GO:0038023	signaling receptor activity	465	8	22	0.170812	4.68061e-05	1	0.0216106	LEF1, PRTG, GABRB3, PTCH1, NR6A1, ESRRA, PAQR3, NECTIN1	ITGA11, PDGFRL, SORT1, AXL, ENG, TNFRSF1A, TGFBR2, CD47, ADGRF5, NR3C1, IL6ST, NTRK2, OPN3, F2R, LIFR, EFEMP1, OXTR, RAMP1, ITGB8, SDC4, IL11RA, GPR176
S1 vs S2A	MF	Down	GO:0060089	molecular transducer activity	465	8	22	0.170812	4.68061e-05	1	0.0216106	LEF1, PRTG, GABRB3, PTCH1, NR6A1, ESRRA, PAQR3, NECTIN1	ITGA11, PDGFRL, SORT1, AXL, ENG, TNFRSF1A, TGFBR2, CD47, ADGRF5, NR3C1, IL6ST, NTRK2, OPN3, F2R, LIFR, EFEMP1, OXTR, RAMP1, ITGB8, SDC4, IL11RA, GPR176
S1 vs S2A	MF	Down	GO:0004720	protein-lysine 6-oxidase activity	5	0	3	1	0.00026217	1	0.0612181		LOXL1, LOXL4, LOXL2
S1 vs S2A	MF	Down	GO:0019955	cytokine binding	75	0	8	1	0.000266682	1	0.061564		ENG, PLP2, TNFRSF1A, TGFBR2, IL6ST, LIFR, IL11RA, A2M
S1 vs S2A	MF	Down	GO:0061135	endopeptidase regulator activity	83	3	9	0.162919	0.000333351	1	0.074418	UCHL5, LEF1, PSME3	SERPINB6, CST3, PSME1, BST2, SERPING1, SPINT2, CARD16, TIMP1, A2M
S1 vs S2A	MF	Down	GO:0004866	endopeptidase inhibitor activity	76	2	8	0.350921	0.000705991	1	0.122104	UCHL5, LEF1	SERPINB6, CST3, BST2, SERPING1, SPINT2, CARD16, TIMP1, A2M
S1 vs S2A	MF	Down	GO:0005030	neurotrophin receptor activity	3	0	2	1	0.000742176	1	0.123585		SORT1, NTRK2
S1 vs S2A	MF	Down	GO:0030414	peptidase inhibitor activity	77	2	8	0.356048	0.000762311	1	0.125905	UCHL5, LEF1	SERPINB6, CST3, BST2, SERPING1, SPINT2, CARD16, TIMP1, A2M
S1 vs S2A	MF	Down	GO:0016641	oxidoreductase activity, acting on the CH-NH2 group of donors, oxygen as acceptor	10	0	3	1	0.000831059	1	0.131536		LOXL1, LOXL4, LOXL2
S1 vs S2A	MF	Down	GO:0004923	leukemia inhibitory factor receptor activity	2	0	2	1	0.000897808	1	0.134728		IL6ST, LIFR
S1 vs S2A	MF	Down	GO:0004921	interleukin-11 receptor activity	2	0	2	1	0.000905297	1	0.134728		IL6ST, IL11RA
S1 vs S2A	MF	Down	GO:0019970	interleukin-11 binding	2	0	2	1	0.000905297	1	0.134728		IL6ST, IL11RA
S1 vs S2A	MF	Down	GO:0030020	extracellular matrix structural constituent conferring tensile strength	31	0	5	1	0.000921983	1	0.134749		COL8A1, COL6A2, COL5A2, COL13A1, COL5A1
S1 vs S2A	MF	Down	GO:0016638	oxidoreductase activity, acting on the CH-NH2 group of donors	12	0	3	1	0.0015604	1	0.185157		LOXL1, LOXL4, LOXL2
S1 vs S2A	KEGG	Up	hsa03008	Ribosome biogenesis in eukaryotes	73	11	1	2.86097e-07	0.90611	9.61286e-05	1	NOP56, WDR43, TCOF1, MDN1, FBL, DKC1, UTP18, NAT10, GTPBP4, WDR3, POP1	XRN1
S1 vs S2A	KEGG	Up	hsa04310	Wnt signaling pathway	123	7	3	0.00556102	0.62449	0.934251	1	NKD1, AXIN2, RAC3, ZNRF3, LEF1, RUVBL1, NOTUM	CCND3, SFRP1, WNT5A
S1 vs S2A	KEGG	Up	hsa03018	RNA degradation	74	5	1	0.018084	0.902135	1	1	HSPD1, HSPA9, PNPT1, EXOSC2, EXOSC8	XRN1
S1 vs S2A	KEGG	Up	hsa00230	Purine metabolism	94	5	2	0.0247134	0.710222	1	1	PAICS, NME1, PPAT, PDE7A, PFAS	GMPR, PGM1
S1 vs S2A	KEGG	Up	hsa03020	RNA polymerase	31	3	0	0.0288154	1	1	1	POLR1E, POLR1A, POLR3K
S1 vs S2A	KEGG	Up	hsa05416	Viral myocarditis	40	3	2	0.0364853	0.297062	1	1	CYCS, RAC3, LAMA1	HLA-E, MYH7
S1 vs S2A	KEGG	Up	hsa00670	One carbon pool by folate	17	2	0	0.041329	1	1	1	MTHFD1L, SHMT2
S1 vs S2A	KEGG	Up	hsa05217	Basal cell carcinoma	48	3	1	0.0438011	0.694998	1	1	AXIN2, LEF1, PTCH1	WNT5A
S1 vs S2A	KEGG	Up	hsa00970	Aminoacyl-tRNA biosynthesis	44	3	0	0.0556091	1	1	1	TARS, YARS, QRSL1
S1 vs S2A	KEGG	Up	hsa05033	Nicotine addiction	9	1	0	0.0566867	1	1	1	GABRB3
S1 vs S2A	KEGG	Up	hsa00260	Glycine, serine and threonine metabolism	25	2	0	0.064291	1	1	1	SHMT2, PHGDH
S1 vs S2A	KEGG	Up	hsa05210	Colorectal cancer	83	4	2	0.0865949	0.716815	1	1	AXIN2, CYCS, RAC3, LEF1	TGFBR2, TGFB1
S1 vs S2A	KEGG	Up	hsa01230	Biosynthesis of amino acids	57	3	0	0.101175	1	1	1	TKT, SHMT2, PHGDH
S1 vs S2A	KEGG	Up	hsa03013	RNA transport	154	6	0	0.11035	1	1	1	GEMIN5, POM121, POM121C, XPO5, EIF4EBP1, POP1
S1 vs S2A	KEGG	Up	hsa04520	Adherens junction	67	3	1	0.150098	0.868505	1	1	RAC3, LEF1, NECTIN1	TGFBR2
S1 vs S2A	KEGG	Up	hsa04623	Cytosolic DNA-sensing pathway	39	2	2	0.163865	0.292067	1	1	POLR3K, NFKBIB	TMEM173, PYCARD
S1 vs S2A	KEGG	Up	hsa05145	Toxoplasmosis	80	3	4	0.165034	0.153213	1	1	CYCS, LAMA1, NFKBIB	JAK1, TNFRSF1A, TGFB1, LAMB2
S1 vs S2A	KEGG	Up	hsa05231	Choline metabolism in cancer	81	3	0	0.172081	1	1	1	RAC3, CHKA, EIF4EBP1
S1 vs S2A	KEGG	Up	hsa05032	Morphine addiction	52	2	2	0.172222	0.304997	1	1	GABRB3, PDE7A	GNB5, GNG11
S1 vs S2A	KEGG	Up	hsa04962	Vasopressin-regulated water reabsorption	37	2	1	0.177454	0.684246	1	1	DYNLL2, DYNC2H1	DYNC1I1
S1 vs S2A	KEGG	Down	hsa04512	ECM-receptor interaction	64	2	10	0.288678	2.8913e-06	1	0.000971476	TNC, LAMA1	ITGA11, CD47, NPNT, COL6A2, HSPG2, FN1, LAMB2, THBS2, ITGB8, SDC4
S1 vs S2A	KEGG	Down	hsa04610	Complement and coagulation cascades	32	1	5	0.380513	0.000589148	1	0.0989768	F12	CD59, SERPING1, F2R, PLAT, A2M
S1 vs S2A	KEGG	Down	hsa04060	Cytokine-cytokine receptor interaction	116	0	8	1	0.00113745	1	0.126297		TNFRSF1A, TGFBR2, TNFSF15, IL6ST, LIFR, TGFB1, LTBR, IL11RA
S1 vs S2A	KEGG	Down	hsa04621	NOD-like receptor signaling pathway	125	1	10	0.895869	0.00150354	1	0.126297	NFKBIB	CASP4, TMEM173, NLRP1, JAK1, GABARAPL1, GSDMD, IFI16, PYCARD, CARD16, STAT2
S1 vs S2A	KEGG	Down	hsa04151	PI3K-Akt signaling pathway	257	3	15	0.838025	0.00257734	1	0.173197	TNC, LAMA1, EIF4EBP1	ITGA11, SGK1, CCND3, JAK1, NTRK2, COL6A2, GNB5, F2R, FN1, GNG11, LAMB2, THBS2, ITGB8, FGF5, IGF2.1
S1 vs S2A	KEGG	Down	hsa04974	Protein digestion and absorption	48	0	5	1	0.00633475	1	0.354746		COL6A2, COL5A2, COL13A1, DPP4, COL5A1
S1 vs S2A	KEGG	Down	hsa04142	Lysosome	111	1	8	0.869187	0.0089675	1	0.43044	AP1S2	LAPTM4A, SORT1, CTSD, HGSNAT, TPP1, TCIRG1, SUMF1, SMPD1
S1 vs S2A	KEGG	Down	hsa04217	Necroptosis	116	0	8	1	0.010739	1	0.433542		CHMP2A, JAK1, TNFRSF1A, H2AFJ, HIST1H2AC, PYCARD, SMPD1, STAT2
S1 vs S2A	KEGG	Down	hsa04137	Mitophagy - animal	64	0	6	1	0.0116127	1	0.433542		BNIP3L, NBR1, RRAS, GABARAPL1, PINK1, CITED2
S1 vs S2A	KEGG	Down	hsa04061	Viral protein interaction with cytokine and cytokine receptor	33	0	3	1	0.0203661	1	0.664404		TNFRSF1A, IL6ST, LTBR
S1 vs S2A	KEGG	Down	hsa04630	JAK-STAT signaling pathway	93	0	6	1	0.0223228	1	0.664404		CCND3, JAK1, IL6ST, LIFR, IL11RA, STAT2
S1 vs S2A	KEGG	Down	hsa05165	Human papillomavirus infection	264	4	13	0.719785	0.0254438	1	0.664404	AXIN2, TNC, LAMA1, EIF4EBP1	ITGA11, CCND3, JAK1, TNFRSF1A, COL6A2, HLA-E, FN1, LAMB2, WNT5A, THBS2, ITGB8, TCIRG1, STAT2
S1 vs S2A	KEGG	Down	hsa04672	Intestinal immune network for IgA production	16	0	2	1	0.0257061	1	0.664404		TGFB1, LTBR
S1 vs S2A	KEGG	Down	hsa00040	Pentose and glucuronate interconversions	13	1	2	0.209801	0.0449568	1	0.96184	SORD	CRYL1, ISPD
S1 vs S2A	KEGG	Down	hsa04640	Hematopoietic cell lineage	35	0	3	1	0.0449716	1	0.96184		CD59, CD9, IL11RA
S1 vs S2A	KEGG	Down	hsa04810	Regulation of actin cytoskeleton	167	1	9	0.963052	0.0470914	1	0.96184	RAC3	MYLPF, ITGA11, GSN, RRAS, F2R, FN1, SSH3, ITGB8, FGF5
S1 vs S2A	KEGG	Down	hsa05167	Kaposi sarcoma-associated herpesvirus infection	147	1	8	0.939337	0.0486645	1	0.96184	CYCS	JAK1, TNFRSF1A, GABARAPL1, IL6ST, GNB5, HLA-E, GNG11, STAT2
S1 vs S2A	KEGG	Down	hsa00600	Sphingolipid metabolism	34	0	3	1	0.0581857	1	1		UGCG, SGMS2, SMPD1
S1 vs S2A	KEGG	Down	hsa04014	Ras signaling pathway	167	1	8	0.946144	0.0597839	1	1	RAC3	RRAS, PLA2G16, NTRK2, GNB5, GNG11, RASGRP2, FGF5, IGF2.1
S1 vs S2A	KEGG	Down	hsa05200	Pathways in cancer	404	7	16	0.57788	0.0601576	1	1	AXIN2, CYCS, RAC3, LEF1, LAMA1, PTCH1, SKP2	CCND3, JAK1, TGFBR2, IL6ST, GNB5, F2R, FN1, GNG11, TGFB1, LAMB2, WNT5A, NCOA1, RASGRP2, STAT2, FGF5, IGF2.1

## Sheet: S1 vs S2B
Supplementary file 2. Top 20 Up and Down GO terms (BP, CC, MF) and KEGG pathways for pairwise cell type comparisons. Terms comprising N (< 500) genes are sorted by P.Up and P.Down. For each term, the top Genes.Up and Genes.Down are listed.
Comparison	Ont	Dir	GO/KEGG ID	GO Term / KEGG Pathway (top 20 Up and Down)	N	Up	Down	P.Up	P.Down	FDR.Up	FDR.Down	Genes.Up (limited to a maximum of the top 30 Up genes)	Genes.Down (limited to a maximum of the top 30 Down genes)
S1 vs S2B	BP	Up	GO:0006935	chemotaxis	408	63	46	1.03226e-10	0.0324575	1.25982e-06	0.725655	LEF1, SLIT2, B3GNT2, LAMA1, GLI3, NECTIN1, GLI2, EFNB3, ITGA1, GAP43, PTCH1, EFNB1, BOC, PLCG1, NRP2, AMOT, DRAXIN, TGFB1, EXT1, DOK4, CYFIP2, IGSF9, CXCL14, EFNA4, EFNB2, CCR10, AGRN, PRKD2, ANGPT2, ROBO1	JAM3, C5, SEMA3E, RPS6KA5, ISPD, GPC1, DAG1, SEMA6A, RIPOR2, MSTN, DYSF, LRTM1, NEXN, CDK5R1, MYPN, SBDS, SCRIB, PLXNA1, ERBB2, NCAM1, SEMA6B, PLP2, OPHN1, SEMA6C, PLGRKT, MYOT, HSPB1, SPTBN5, ETV1, FYN
S1 vs S2B	BP	Up	GO:0042330	taxis	410	63	46	1.24029e-10	0.0346339	1.25982e-06	0.754923	LEF1, SLIT2, B3GNT2, LAMA1, GLI3, NECTIN1, GLI2, EFNB3, ITGA1, GAP43, PTCH1, EFNB1, BOC, PLCG1, NRP2, AMOT, DRAXIN, TGFB1, EXT1, DOK4, CYFIP2, IGSF9, CXCL14, EFNA4, EFNB2, CCR10, AGRN, PRKD2, ANGPT2, ROBO1	JAM3, C5, SEMA3E, RPS6KA5, ISPD, GPC1, DAG1, SEMA6A, RIPOR2, MSTN, DYSF, LRTM1, NEXN, CDK5R1, MYPN, SBDS, SCRIB, PLXNA1, ERBB2, NCAM1, SEMA6B, PLP2, OPHN1, SEMA6C, PLGRKT, MYOT, HSPB1, SPTBN5, ETV1, FYN
S1 vs S2B	BP	Up	GO:0099536	synaptic signaling	416	61	53	1.41761e-09	0.00204294	5.75973e-06	0.113085	RAC3, KCNQ2, LYPD1, SV2A, NSMF, PMP22, GABRB3, EFNB3, DNM1, RGS10, PRR7, ITPKA, SYNGAP1, APOE, PLCG1, SYNGR1, PFN2, PPT1, MPP2, GJC1, AKAP12, MINK1, LPAR3, ASIC1, PLK2, AGRN, NETO1, SLITRK5, SIPA1L1, LGMN	CHRND, MEF2C, STAC3, CACNB1, AKAP9, KIF1B, KIF5B, DAG1, CHRNB1, LZTS1, CDK5R1, SCRIB, MAP1A, ATP2A2, RAPSN, CHRNA1, DLG2, PPP3CB, PDLIM4, OPHN1, PREPL, CLSTN2, AKAP7, NPY, SCT, PPFIA4, PTPRD, P2RX6, GJD2, RARA
S1 vs S2B	BP	Up	GO:0048514	blood vessel morphogenesis	454	62	56	1.28574e-08	0.00282381	4.35332e-05	0.142125	LEF1, MMP2, SLIT2, EPN2, LAMA1, ETS1, ID1, FOXC1, ADAM15, THY1, HMGA2, APOE, PLCG1, NRP2, AMOT, TGFBR3, JAG1, TGFB1, PRDM1, MYO1E, GJC1, JUN, CYP1B1, EFNB2, PLK2, PRKD2, PRRX1, ANGPT2, ROBO1, SPHK1	RBPJ, JAM3, STARD13, SEMA3E, EMC10, DLL1, VASH2, FOLR1, DAG1, SEMA6A, DYSF, MYO18B, ERBB2, ARHGAP24, KLF5, RAMP1, SPRY2, BTG1, SMAD1, KLF2, JAK1, CITED1, HSPB1, RUNX1, LRP5, EMP2, TNNI3, PDPK1, COL8A1, NGFR
S1 vs S2B	BP	Up	GO:0099537	trans-synaptic signaling	403	57	52	1.78583e-08	0.0017267	5.18273e-05	0.10051	RAC3, KCNQ2, LYPD1, SV2A, NSMF, PMP22, GABRB3, EFNB3, DNM1, ITPKA, SYNGAP1, APOE, PLCG1, SYNGR1, PFN2, PPT1, MPP2, GJC1, AKAP12, MINK1, LPAR3, ASIC1, PLK2, NETO1, SLITRK5, SIPA1L1, LGMN, PRKAR2B, DLG3, CDH2	CHRND, MEF2C, STAC3, CACNB1, AKAP9, KIF1B, KIF5B, DAG1, CHRNB1, LZTS1, SCRIB, MAP1A, ATP2A2, RAPSN, CHRNA1, DLG2, PPP3CB, PDLIM4, OPHN1, PREPL, CLSTN2, AKAP7, NPY, SCT, PPFIA4, PTPRD, P2RX6, GJD2, RARA, VAMP2
S1 vs S2B	BP	Up	GO:0061564	axon development	388	55	49	2.73836e-08	0.00344133	6.25062e-05	0.164495	SLIT2, B3GNT2, LAMA1, GLI3, NECTIN1, GLI2, EFNB3, GAP43, SYNGAP1, PTCH1, EFNB1, BOC, THY1, TTL, APOE, PLCG1, NRP2, METRN, DRAXIN, EXT1, DOK4, CERS2, CYFIP2, TNC, IGSF9, JUN, EFNA4, LPAR3, EFNB2, AGRN	JAM3, COBL, SEMA3E, RPS6KA5, ISPD, FOLR1, GPC1, DAG1, SEMA6A, MACF1, RTN4, LRTM1, NEXN, CDK5R1, MYPN, PLXNA1, DDR1, MAP1A, ERBB2, NCAM1, ZEB2, ITGA4, SEMA6B, PPP3CB, OPHN1, NIN, SEMA6C, MYOT, SPTBN5, ETV1
S1 vs S2B	BP	Up	GO:0010721	negative regulation of cell development	239	40	27	2.76916e-08	0.0757982	6.25062e-05	1	SLIT2, LIN28A, PMP22, GLI3, PRTG, GDF11, EFNB3, ID1, SYNGAP1, THY1, APOE, G6PD, ID4, DRAXIN, JAG1, TGFB1, ID3, CERS2, S1PR3, NR2F1, IGF1, EFNB2, PLK2, HES4, NRG1, BMP7, DIXDC1, POSTN, LINGO1, DNM3	SEMA3E, ARHGEF2, DLL1, CAV3, SEMA6A, SOX8, SIRT2, RTN4, CDK5R1, SEMA6B, FUOM, SRGAP2C, RGS2, SEMA6C, PITX3, NGFR, IDH2, LGALS1, FBXW7, RTN4R, DAAM2, KANK1, ARHGAP4, KREMEN1, PPARA, FGF13, EPHA7
S1 vs S2B	BP	Up	GO:0007268	chemical synaptic transmission	396	55	50	5.85015e-08	0.00330855	0.000101188	0.160031	RAC3, KCNQ2, LYPD1, SV2A, NSMF, PMP22, GABRB3, EFNB3, DNM1, ITPKA, SYNGAP1, APOE, PLCG1, SYNGR1, PFN2, PPT1, MPP2, GJC1, AKAP12, MINK1, LPAR3, ASIC1, PLK2, NETO1, SLITRK5, SIPA1L1, LGMN, PRKAR2B, DLG3, CDH2	CHRND, MEF2C, STAC3, CACNB1, AKAP9, KIF1B, KIF5B, CHRNB1, LZTS1, SCRIB, MAP1A, ATP2A2, RAPSN, CHRNA1, DLG2, PPP3CB, PDLIM4, OPHN1, PREPL, CLSTN2, AKAP7, NPY, SCT, PPFIA4, P2RX6, GJD2, RARA, VAMP2, FYN, TMEM108
S1 vs S2B	BP	Up	GO:0098916	anterograde trans-synaptic signaling	396	55	50	5.85015e-08	0.00330855	0.000101188	0.160031	RAC3, KCNQ2, LYPD1, SV2A, NSMF, PMP22, GABRB3, EFNB3, DNM1, ITPKA, SYNGAP1, APOE, PLCG1, SYNGR1, PFN2, PPT1, MPP2, GJC1, AKAP12, MINK1, LPAR3, ASIC1, PLK2, NETO1, SLITRK5, SIPA1L1, LGMN, PRKAR2B, DLG3, CDH2	CHRND, MEF2C, STAC3, CACNB1, AKAP9, KIF1B, KIF5B, CHRNB1, LZTS1, SCRIB, MAP1A, ATP2A2, RAPSN, CHRNA1, DLG2, PPP3CB, PDLIM4, OPHN1, PREPL, CLSTN2, AKAP7, NPY, SCT, PPFIA4, P2RX6, GJD2, RARA, VAMP2, FYN, TMEM108
S1 vs S2B	BP	Up	GO:0045665	negative regulation of neuron differentiation	163	31	18	5.97712e-08	0.150522	0.000101188	1	SLIT2, PMP22, GLI3, GDF11, EFNB3, ID1, SYNGAP1, THY1, APOE, ID4, DRAXIN, JAG1, ID3, CERS2, NR2F1, EFNB2, PLK2, HES4, BMP7, DIXDC1, LINGO1, DNM3, PAQR3, PTPRS, LRP1, PTPRG, MDM2, SOX9, NOTCH3, PBX1	SEMA3E, DLL1, SEMA6A, SOX8, RTN4, CDK5R1, SEMA6B, FUOM, SRGAP2C, SEMA6C, NGFR, LGALS1, RTN4R, KANK1, ARHGAP4, KREMEN1, FGF13, EPHA7
S1 vs S2B	BP	Up	GO:0048812	neuron projection morphogenesis	494	64	56	6.61099e-08	0.0171216	0.000103309	0.487149	SLIT2, B3GNT2, LAMA1, NSMF, GLI3, NECTIN1, GLI2, EFNB3, ITGA1, GAP43, ID1, ITPKA, SYNGAP1, PTCH1, EFNB1, BOC, THY1, TTL, APOE, PLCG1, NRP2, METRN, DRAXIN, EXT1, DOK4, CYFIP2, MINK1, IGSF9, CNTNAP1, EFNA4	COBL, SEMA3E, RPS6KA5, ISPD, GPC1, DAG1, SEMA6A, RBFOX2, MACF1, RTN4, LRTM1, LZTS1, NEXN, CDK5R1, MYPN, PLXNA1, DDR1, MAP1A, ERBB2, NCAM1, ZEB2, ITGA4, SEMA6B, PPP3CB, OPHN1, NIN, SEMA6C, MYOT, PTPRD, SPTBN5
S1 vs S2B	BP	Up	GO:0060485	mesenchyme development	218	37	31	7.6872e-08	0.00318342	0.000111547	0.155834	KITLG, LEF1, MSX1, TCOF1, MEOX1, FOXC1, ADAM15, EFNB1, HMGA2, AXIN2, NRP2, TGFBR3, RDH10, JAG1, TGFB1, MSX2, WNT16, ZNF703, ROBO1, SNAI2, GREM1, NRG1, BMP7, TIAM1, EDNRA, MYC, HEY2, TWIST1, TGFB2, CRB2	RBPJ, ERBB3, MEF2C, ACTA1, SEMA3E, RBM24, WWTR1, FOLR1, DAG1, SEMA6A, SOX8, RTN4, ZEB2, CRELD1, SEMA6B, SIX2, SEMA6C, SCX, ADIPOR1, ANXA6, WNT2, ACTC1, TGFBR2, SPRY1, LAMA5, GLIPR2, PBLD, HAS2, FGF9, TGFB3
S1 vs S2B	BP	Up	GO:0048762	mesenchymal cell differentiation	175	32	23	1.00051e-07	0.0239044	0.000135503	0.60027	KITLG, LEF1, MSX1, TCOF1, FOXC1, ADAM15, EFNB1, HMGA2, AXIN2, NRP2, TGFBR3, RDH10, JAG1, TGFB1, MSX2, WNT16, ZNF703, SNAI2, GREM1, NRG1, BMP7, TIAM1, EDNRA, HEY2, TWIST1, TGFB2, CRB2, DAB2IP, SOX9, BAMBI	RBPJ, MEF2C, SEMA3E, WWTR1, FOLR1, DAG1, SEMA6A, SOX8, RTN4, ZEB2, SEMA6B, SIX2, SEMA6C, ADIPOR1, ANXA6, WNT2, TGFBR2, SPRY1, LAMA5, GLIPR2, PBLD, HAS2, TGFB3
S1 vs S2B	BP	Up	GO:0001501	skeletal system development	394	54	38	1.17545e-07	0.238584	0.000149245	1	ZNF385A, MSX1, MMP2, GLI3, GDF11, DMRT2, TCOF1, PCGF2, GLI2, WNT2B, SRD5A1, FLI1, FOXC1, RARG, HMGA2, AXIN2, SP5, CHST11, RDH10, TGFB1, EXT1, SOX5, SH3PXD2B, IGF1, HAPLN1, TRPS1, MSX2, TFAP2A, VCAN, DEAF1	RYR1, MEF2C, TMEM38B, TEAD4, SBDS, CDKN1C, SIX2, WNT9A, SMAD1, MEF2D, FOXP1, WDR5, LRRC17, SCX, ANXA6, LRP5, RARA, INPPL1, COL19A1, BCAN, TRIM45, HSD17B7, TGFBR2, JAG2, FBXW7, TTC9, IGF2.1, AES, MATN3, MAF
S1 vs S2B	BP	Up	GO:0007409	axonogenesis	355	50	44	1.43046e-07	0.00766163	0.000165776	0.285963	SLIT2, B3GNT2, LAMA1, GLI3, NECTIN1, GLI2, EFNB3, GAP43, SYNGAP1, PTCH1, EFNB1, BOC, THY1, TTL, APOE, PLCG1, NRP2, METRN, DRAXIN, EXT1, DOK4, CYFIP2, IGSF9, EFNA4, LPAR3, EFNB2, AGRN, SLITRK5, ROBO1, SIPA1L1	COBL, SEMA3E, RPS6KA5, ISPD, GPC1, DAG1, SEMA6A, MACF1, RTN4, LRTM1, NEXN, CDK5R1, MYPN, PLXNA1, MAP1A, ERBB2, NCAM1, ZEB2, ITGA4, SEMA6B, PPP3CB, OPHN1, NIN, SEMA6C, MYOT, SPTBN5, ETV1, FYN, MAP2K1, PALLD
S1 vs S2B	BP	Up	GO:0050768	negative regulation of neurogenesis	206	35	23	1.46885e-07	0.103544	0.000165776	1	SLIT2, LIN28A, PMP22, GLI3, PRTG, GDF11, EFNB3, ID1, SYNGAP1, THY1, APOE, ID4, DRAXIN, JAG1, TGFB1, ID3, CERS2, NR2F1, EFNB2, PLK2, HES4, NRG1, BMP7, DIXDC1, LINGO1, DNM3, PAQR3, PTPRS, LRP1, PTPRG	SEMA3E, ARHGEF2, DLL1, SEMA6A, SOX8, SIRT2, RTN4, CDK5R1, SEMA6B, FUOM, SRGAP2C, SEMA6C, PITX3, NGFR, IDH2, LGALS1, RTN4R, DAAM2, KANK1, ARHGAP4, KREMEN1, FGF13, EPHA7
S1 vs S2B	BP	Up	GO:0045664	regulation of neuron differentiation	490	62	55	1.75162e-07	0.0183349	0.000187285	0.504305	RAC3, SLIT2, LIN28A, NSMF, PMP22, GLI3, GDF11, GLI2, EFNB3, ID1, ITPKA, SYNGAP1, THY1, TTL, APOE, PCP4, ID4, METRN, DRAXIN, JAG1, ID3, CERS2, TENM3, SOCS2, NR2F1, LPAR3, EFNB2, PLK2, PRRX1, GDF6	NCOA1, MEF2C, COBL, SEMA3E, ARHGEF2, DLL1, BIN1, SEMA6A, SOX8, RAPGEF1, MACF1, RTN4, LZTS1, CDK5R1, PLXNA1, ZEB2, MYCL, SEMA6B, NIN, FUOM, SRGAP2C, ITGA6, RGS2, SEMA6C, PTPRD, RARA, OBSL1, FYN, MAP2K1, NPTN
S1 vs S2B	BP	Up	GO:0048592	eye morphogenesis	104	23	11	1.99951e-07	0.272879	0.0002031	1	NKD1, GLI3, GDF11, NECTIN1, WNT2B, RARG, THY1, JAG1, PRDM1, TENM3, WNT16, TFAP2A, AGTPBP1, EPHA2, KDM2B, BMP7, HIPK2, TWIST1, FOXE3, FBN2, SOX9, MFAP2, BCL2	DLL1, SOX8, WNT9A, PITX3, LRP5, NECTIN3, BCAR3, WNT2, COL8A1, SHROOM2, NAGLU
S1 vs S2B	BP	Up	GO:0001837	epithelial to mesenchymal transition	115	24	12	2.32908e-07	0.252299	0.000225311	1	LEF1, MSX1, TCOF1, FOXC1, ADAM15, HMGA2, AXIN2, TGFBR3, JAG1, TGFB1, MSX2, WNT16, ZNF703, SNAI2, GREM1, BMP7, TIAM1, HEY2, TWIST1, TGFB2, CRB2, DAB2IP, SOX9, BAMBI	RBPJ, WWTR1, DAG1, RTN4, ADIPOR1, WNT2, TGFBR2, SPRY1, GLIPR2, PBLD, HAS2, TGFB3
S1 vs S2B	BP	Up	GO:0051961	negative regulation of nervous system development	221	36	24	2.97697e-07	0.124348	0.000267188	1	SLIT2, LIN28A, PMP22, GLI3, PRTG, GDF11, EFNB3, ID1, SYNGAP1, THY1, APOE, ID4, DRAXIN, JAG1, TGFB1, ID3, CERS2, NR2F1, EFNB2, PLK2, HES4, NRG1, BMP7, DIXDC1, LINGO1, DNM3, PAQR3, PTPRS, LRP1, PTPRG	SEMA3E, ARHGEF2, DLL1, SEMA6A, SOX8, SIRT2, RTN4, CDK5R1, SEMA6B, FUOM, SRGAP2C, SEMA6C, PITX3, NGFR, IDH2, LGALS1, PRKACA, RTN4R, DAAM2, KANK1, ARHGAP4, KREMEN1, FGF13, EPHA7
S1 vs S2B	BP	Down	GO:0003012	muscle system process	329	23	119	0.377874	1.68019e-46	1	1.65844e-42	SORBS3, ITGA1, CNN1, FLNA, TPM4, G6PD, TMOD3, GJC1, IGF1, ARG2, SPHK1, SLC9A1, CACNA1C, TIAM1, DOCK4, EDNRA, STAC, DSP, HEY2, LMOD1, ATP2B4, GJA1, MYL9	ACTN2, TMEM38A, TNNI2, CASQ2, SMPX, MYH3, MYOG, GATM, MYLPF, RYR1, LMOD3, TNNT3, TNNC2, CACNA2D1, CHRND, MEF2C, MYL1, MYOZ2, TRIM72, ACTA1, STAC3, MYH7, CALM1, MYOM1, TCAP, MYBPH, MYH8, NPNT, TMEM38B, TNNC1
S1 vs S2B	BP	Down	GO:0006936	muscle contraction	253	19	97	0.278059	1.55412e-40	1	6.31437e-37	SORBS3, ITGA1, CNN1, FLNA, TPM4, TMOD3, GJC1, ARG2, SPHK1, SLC9A1, CACNA1C, DOCK4, EDNRA, STAC, DSP, LMOD1, ATP2B4, GJA1, MYL9	ACTN2, TMEM38A, TNNI2, CASQ2, SMPX, MYH3, MYLPF, RYR1, LMOD3, TNNT3, TNNC2, CACNA2D1, CHRND, MYL1, TRIM72, ACTA1, STAC3, MYH7, CALM1, MYOM1, TCAP, MYBPH, MYH8, NPNT, TMEM38B, TNNC1, AKAP9, NEB, HRC, BIN1
S1 vs S2B	BP	Down	GO:0051146	striated muscle cell differentiation	223	20	84	0.0843705	1.64116e-34	0.705344	5.55671e-31	MSX1, FBXO22, G6PD, TGFB1, TMOD3, KRT8, IGF1, EFNB2, MYH9, GREM1, SDC1, NRG1, SLC9A1, MMP14, CDH2, ARRB2, HEY2, LMOD1, CSRP1, BCL2	ACTN2, SMYD1, CASQ2, RBPJ, MYH3, MYOG, RYR1, LMOD3, TNNT3, MYMX, CFL2, MEF2C, MYOZ2, TRIM72, ACTA1, STAC3, MYOM1, TCAP, MAMSTR, DLL1, RBM24, KLHL40, NEB, AKAP6, SYNPO2L, CAV3, SORT1, RIPOR2, MYOM3, DYSF
S1 vs S2B	BP	Down	GO:0007517	muscle organ development	322	25	102	0.216224	1.35761e-33	1	3.93997e-30	LEF1, MSX1, FOXC1, FBXO22, MAPK12, G6PD, TGFBR3, TGFB1, ID3, FOS, IGF1, EFNB2, PAX3, GREM1, NRG1, COL6A3, ARRB2, DSP, TAGLN, HEY2, TWIST1, TGFB2, GJA1, HBEGF, BCL2	SMYD1, CAVIN4, RBPJ, ERBB3, MYH3, MYOG, MYLPF, RYR1, LMOD3, MYMX, SRPK3, CHRND, CFL2, MEF2C, MYOZ2, TRIM72, ACTA1, STAC3, MYH7, MYOM1, TCAP, UNC45B, TNNC1, DLL1, RBM24, KLHL40, NEB, AKAP6, ZBTB18, CAV3
S1 vs S2B	BP	Down	GO:0055001	muscle cell development	143	11	65	0.316486	1.07039e-32	1	2.71813e-29	FBXO22, G6PD, TMOD3, KRT8, IGF1, SDC1, HEY2, LMOD1, ADM, CSRP1, BCL2	ACTN2, CASQ2, MYH3, MYOG, RYR1, LMOD3, TNNT3, CFL2, MEF2C, MYOZ2, ACTA1, STAC3, MYOM1, TCAP, KLHL40, NEB, AKAP6, BIN1, SYNPO2L, CAV3, RIPOR2, MYOM3, DYSF, SGCB, ALPK3, CHRNB1, TMOD1, MYPN, LDB3, MYO18B
S1 vs S2B	BP	Down	GO:0042692	muscle cell differentiation	294	27	94	0.0417899	8.55184e-32	0.595762	1.93034e-28	MSX1, BOC, FBXO22, PTBP1, MAPK12, G6PD, TGFB1, TMOD3, KRT8, IGF1, EFNB2, MYH9, GREM1, SDC1, NRG1, SLC9A1, MMP14, CDH2, ARRB2, HEY2, CAMK1, LMOD1, ADM, SOX9, CSRP1, OLFM2, BCL2	ACTN2, SMYD1, CASQ2, RBPJ, MYH3, MYOG, RYR1, SMARCD3, LMOD3, TNNT3, MYMX, CFL2, MEF2C, MYOZ2, TRIM72, ACTA1, STAC3, MYOM1, TCAP, NPNT, MAMSTR, DLL1, RBM24, KLHL40, NEB, AKAP6, BIN1, SYNPO2L, CAV3, SORT1
S1 vs S2B	BP	Down	GO:0055002	striated muscle cell development	131	10	61	0.331251	1.30607e-31	1	2.65329e-28	FBXO22, G6PD, TMOD3, KRT8, IGF1, SDC1, HEY2, LMOD1, CSRP1, BCL2	ACTN2, CASQ2, MYH3, MYOG, RYR1, LMOD3, TNNT3, CFL2, MEF2C, MYOZ2, ACTA1, STAC3, MYOM1, TCAP, KLHL40, NEB, AKAP6, SYNPO2L, CAV3, RIPOR2, MYOM3, DYSF, SGCB, ALPK3, CHRNB1, TMOD1, MYPN, LDB3, MYO18B, TTN
S1 vs S2B	BP	Down	GO:0006941	striated muscle contraction	125	8	58	0.570774	1.06881e-29	1	1.80941e-26	FLNA, GJC1, ARG2, SLC9A1, CACNA1C, STAC, DSP, GJA1	TMEM38A, TNNI2, CASQ2, SMPX, MYH3, LMOD3, TNNT3, TNNC2, CACNA2D1, CHRND, MYL1, STAC3, MYH7, CALM1, TCAP, MYBPH, MYH8, TMEM38B, TNNC1, AKAP9, HRC, BIN1, CAV3, KCNE5, ATP2A1, CHRNB1, MYL4, DMPK, TTN, TNNI1
S1 vs S2B	BP	Down	GO:0014706	striated muscle tissue development	300	22	92	0.324386	3.82889e-29	1	5.98338e-26	LEF1, TENM4, FOXC1, FBXO22, G6PD, TGFBR3, TGFB1, GJC1, FOS, IGF1, EFNB2, GREM1, NRG1, SLC9A1, BMP7, ARRB2, DSP, HEY2, TWIST1, TGFB2, GJA1, BCL2	ACTN2, SMYD1, RBPJ, ERBB3, MYOG, MYLPF, RYR1, LMOD3, SRPK3, CHRND, CFL2, MEF2C, MYOZ2, ACTA1, STAC3, MYH7, MYOM1, TCAP, TNNC1, DLL1, RBM24, KLHL40, NEB, AKAP6, ZBTB18, CAV3, GPC1, SOX8, SIRT2, RIPOR2
S1 vs S2B	BP	Down	GO:0030049	muscle filament sliding	33	1	29	0.870293	1.51559e-28	1	2.05262e-25	TPM4	ACTN2, TNNI2, MYH3, TNNT3, TNNC2, MYL1, ACTA1, MYH7, TCAP, MYH8, TNNC1, NEB, MYH2, MYL4, TMOD1, DES, TTN, TNNI1, MYBPC2, MYBPC1, MYL6B, TNNT2, TNNT1, MYL3, TNNI3, ACTC1, DMD, TPM2, TPM1
S1 vs S2B	BP	Down	GO:0033275	actin-myosin filament sliding	33	1	29	0.870293	1.51559e-28	1	2.05262e-25	TPM4	ACTN2, TNNI2, MYH3, TNNT3, TNNC2, MYL1, ACTA1, MYH7, TCAP, MYH8, TNNC1, NEB, MYH2, MYL4, TMOD1, DES, TTN, TNNI1, MYBPC2, MYBPC1, MYL6B, TNNT2, TNNT1, MYL3, TNNI3, ACTC1, DMD, TPM2, TPM1
S1 vs S2B	BP	Down	GO:0060537	muscle tissue development	315	24	93	0.248203	4.10692e-28	1	5.2145e-25	LEF1, TENM4, FOXC1, FBXO22, G6PD, TGFBR3, TGFB1, GJC1, FOS, IGF1, EFNB2, GREM1, NRG1, SLC9A1, BMP7, ARRB2, DSP, HEY2, TWIST1, TGFB2, GJA1, SOX9, CSRP1, BCL2	ACTN2, SMYD1, RBPJ, ERBB3, MYOG, MYLPF, RYR1, LMOD3, SRPK3, CHRND, CFL2, MEF2C, MYOZ2, ACTA1, STAC3, MYH7, MYOM1, TCAP, TNNC1, DLL1, RBM24, KLHL40, NEB, AKAP6, ZBTB18, CAV3, GPC1, SOX8, SIRT2, RIPOR2
S1 vs S2B	BP	Down	GO:0070252	actin-mediated cell contraction	87	7	46	0.310669	1.85106e-27	1	2.08913e-24	FLNA, TPM4, GJC1, SLC9A1, CACNA1C, DSP, GJA1	ACTN2, TNNI2, MYH3, TNNT3, TNNC2, CACNA2D1, MYL1, ACTA1, MYH7, TCAP, MYH8, TNNC1, AKAP9, NEB, BIN1, MYH2, CAV3, KCNE5, ATP2A1, MYL4, TMOD1, DES, TTN, TNNI1, MYBPC2, ATP2A2, KCNH2, MYBPC1, MYL6B, TNNT2
S1 vs S2B	BP	Down	GO:0030048	actin filament-based movement	107	11	49	0.0742241	1.56817e-25	0.678477	1.6767e-22	MYO9B, FLNA, TPM4, MYO1E, GJC1, MYH9, SLC9A1, CACNA1C, DSP, GJA1, MYO5A	ACTN2, TNNI2, MYH3, TNNT3, TNNC2, CACNA2D1, MYL1, ACTA1, MYH7, TCAP, MYH8, TNNC1, WIPF3, AKAP9, NEB, BIN1, MYH2, CAV3, KCNE5, SUN2, ATP2A1, MYL4, TMOD1, DES, TTN, TNNI1, MYBPC2, ATP2A2, KCNH2, MYBPC1
S1 vs S2B	BP	Down	GO:0030239	myofibril assembly	59	4	35	0.518217	1.86428e-23	1	1.7215e-20	TMOD3, KRT8, LMOD1, CSRP1	ACTN2, CASQ2, MYH3, LMOD3, TNNT3, CFL2, MEF2C, MYOZ2, ACTA1, MYOM1, TCAP, NEB, SYNPO2L, CAV3, MYOM3, TMOD1, MYPN, LDB3, TTN, CSRP3, MYBPC2, KLHL41, MYBPC1, TNNT2, TNNT1, OBSCN, PGM5, OBSL1, MEF2A, ACTC1
S1 vs S2B	BP	Down	GO:0003015	heart process	177	14	59	0.264557	3.22925e-21	1	2.85227e-18	FLNA, GJC1, SLC9A1, CACNA1C, DSP, HEY2, ATP2B4, CACNB3, TGFB2, GJA1, ADM, HBEGF, MDM2, ITPR2	TMEM38A, TNNI2, CASQ2, RYR1, TNNT3, CACNA2D1, MYL1, MYH7, CALM1, TCAP, TMEM38B, TNNC1, CACNB1, AKAP9, HRC, WWTR1, BIN1, CAV3, KCNE5, CACNA1S, ATP2A1, MYL4, DES, DMPK, TTN, CSRP3, BVES, ATP2A2, KCNH2, TNNT2
S1 vs S2B	BP	Down	GO:0060047	heart contraction	169	14	57	0.215867	9.30417e-21	1	7.87559e-18	FLNA, GJC1, SLC9A1, CACNA1C, DSP, HEY2, ATP2B4, CACNB3, TGFB2, GJA1, ADM, HBEGF, MDM2, ITPR2	TMEM38A, TNNI2, CASQ2, RYR1, TNNT3, CACNA2D1, MYL1, MYH7, CALM1, TCAP, TMEM38B, TNNC1, CACNB1, AKAP9, HRC, BIN1, CAV3, KCNE5, CACNA1S, ATP2A1, MYL4, DES, DMPK, TTN, CSRP3, BVES, ATP2A2, KCNH2, TNNT2, ABCC9
S1 vs S2B	BP	Down	GO:0045214	sarcomere organization	43	2	28	0.765549	1.29053e-20	1	1.04869e-17	KRT8, CSRP1	ACTN2, CASQ2, MYH3, TNNT3, CFL2, MEF2C, MYOZ2, MYOM1, TCAP, SYNPO2L, CAV3, MYOM3, MYPN, LDB3, TTN, CSRP3, MYBPC2, KLHL41, MYBPC1, TNNT2, TNNT1, OBSCN, OBSL1, PRKAR1A, MYOZ1, TPM1, CSRP2, FHOD3
S1 vs S2B	BP	Down	GO:0060048	cardiac muscle contraction	96	6	40	0.602298	9.43867e-19	1	7.10173e-16	FLNA, GJC1, SLC9A1, CACNA1C, DSP, GJA1	TMEM38A, TNNI2, CASQ2, TNNT3, CACNA2D1, MYL1, MYH7, CALM1, TCAP, TMEM38B, TNNC1, AKAP9, HRC, BIN1, CAV3, KCNE5, ATP2A1, MYL4, TTN, CSRP3, ATP2A2, KCNH2, TNNT2, TNNT1, ATP1A1, MYL3, RGS2, TNNI3, CAMK2D, ACTC1
S1 vs S2B	BP	Down	GO:0090257	regulation of muscle system process	175	11	55	0.582563	1.04346e-18	1	7.5707e-16	CNN1, FLNA, G6PD, IGF1, SPHK1, SLC9A1, CACNA1C, DOCK4, DSP, ATP2B4, MYL9	TMEM38A, TNNI2, CASQ2, MYOG, TNNT3, TNNC2, MYH7, CALM1, MYBPH, NPNT, TMEM38B, TNNC1, AKAP9, AKAP6, HRC, BIN1, CAV3, DAG1, SGCA, MSTN, ATP2A1, DMPK, TNNI1, ATP2A2, PRKG1, FBXO32, MYL5, TNNT2, TNNT1, ATP1A1
S1 vs S2B	CC	Up	GO:0097060	synaptic membrane	266	40	41	8.13289e-07	0.000165856	0.000687393	0.0140978	NSMF, GABRB3, NECTIN1, CLTA, EFNB3, DNM1, PRR7, NRP2, MPP2, MINK1, CNTNAP1, EFNB2, NETO1, SIPA1L1, CPE, DLG3, CDH2, STX3, CACNA1C, RGS14, FABP5, TIAM1, SNAP25, ARRB2, GRIP1, LRRC4C, ATP2B4, DNM3, NLGN2, TENM2	ACTN2, CHRND, ANK1, AKAP9, DAG1, CHRNB1, LZTS1, SCRIB, HIP1, RAPSN, CHRNA1, DLG2, PDLIM4, GRIP2, CLSTN2, CPEB4, SSPN, MUSK, PSEN2, P2RX6, NECTIN3, TMEM108, NPTN, ATP2B1, LRFN4, ROGDI, CRYAB, PDLIM5, LIN7B, DMD
S1 vs S2B	CC	Up	GO:0098978	glutamatergic synapse	250	37	30	1.8083e-06	0.0294184	0.00103317	0.677591	SV2A, ACTN1, EFNB3, FLNA, DNM1, PRR7, SYNGAP1, APOE, PLCG1, NRP2, PFN2, WASF3, EFNB2, NETO1, PRKAR2B, NRG1, DLG3, STX3, RGS14, TIAM1, SNAP25, GRIP1, CAMK1, LRRC4C, ATP2B4, DNM3, PTPRS, PLCB4, CDH11, NPTX1	ACTN2, ARHGEF2, AKAP9, ABLIM3, DAG1, FXR1, SCRIB, HIP1, DLG2, PPP3CB, GRIP2, OPHN1, CLSTN2, PTPRD, P2RX6, FZD9, FYN, NPTN, ACTC1, BCAN, ATP2B1, LRFN4, PRKAR1A, RTN4R, EPS8, GRASP, SPARC, NPTX2, ABHD17C, EPHA7
S1 vs S2B	CC	Up	GO:0031012	extracellular matrix	310	41	41	6.62568e-06	0.00183928	0.00240242	0.104372	F12, MMP2, GFOD2, LAMA1, WNT2B, APOE, TGFBR3, COLEC12, CTSB, TGFB1, TNC, HMCN1, HAPLN1, VCAN, AGRN, ANGPTL2, GREM1, COL4A1, COL6A3, BMP7, MMP14, CDH2, POSTN, RELL2, CD248, GPC3, SCARA3, LINGO1, COL26A1, COL7A1	LAD1, NPNT, NAV2, GPC1, DAG1, SERPINB6, BCAM, AC007325.4, LGALS3BP, ANXA5, F13A1, NCAM1, CRELD1, ADAMTS5, ITGA6, ANXA11, LRRC17, ANXA6, ADAMTSL5, WNT2, COL8A1, ACHE, COL19A1, BCAN, LGALS1, OLFML2A, LAMA5, HSPG2, DGCR6, SERPINF1
S1 vs S2B	CC	Up	GO:0062023	collagen-containing extracellular matrix	254	35	33	1.0838e-05	0.00569982	0.0033873	0.236743	F12, MMP2, LAMA1, WNT2B, APOE, CTSB, TGFB1, TNC, HMCN1, HAPLN1, VCAN, AGRN, ANGPTL2, GREM1, COL4A1, COL6A3, BMP7, CDH2, POSTN, RELL2, GPC3, SCARA3, COL26A1, COL7A1, NID2, TIMP3, TGFB2, FGFBP3, MXRA5, COL23A1	LAD1, NPNT, NAV2, GPC1, DAG1, SERPINB6, BCAM, LGALS3BP, ANXA5, F13A1, NCAM1, CRELD1, ADAMTS5, ITGA6, ANXA11, ANXA6, WNT2, COL8A1, ACHE, COL19A1, LGALS1, LAMA5, HSPG2, SERPINF1, MATN3, MFAP5, ADAMTSL4, SPARC, THBS2, TNXB
S1 vs S2B	CC	Up	GO:0045211	postsynaptic membrane	197	30	36	1.5105e-05	1.09216e-05	0.00432195	0.00126064	NSMF, GABRB3, EFNB3, DNM1, PRR7, NRP2, MINK1, EFNB2, NETO1, SIPA1L1, DLG3, CDH2, CACNA1C, RGS14, FABP5, TIAM1, ARRB2, GRIP1, LRRC4C, DNM3, NLGN2, TENM2, PTPRS, CHRNA5, GABBR1, BAALC, GABRE, GABRA5, NRP1, SHANK3	ACTN2, CHRND, ANK1, AKAP9, DAG1, CHRNB1, LZTS1, SCRIB, HIP1, RAPSN, CHRNA1, DLG2, PDLIM4, GRIP2, CLSTN2, CPEB4, SSPN, MUSK, P2RX6, NECTIN3, TMEM108, NPTN, LRFN4, PDLIM5, LIN7B, DMD, GRIK1, CAMK2N1, NEURL1, CHRNG
S1 vs S2B	CC	Up	GO:0098794	postsynapse	433	51	57	2.10627e-05	0.000414473	0.00573673	0.0300715	NSMF, GABRB3, CLTA, EFNB3, GAP43, FLNA, DNM1, RGS10, PRR7, ITPKA, SYNGAP1, PTCH1, NRP2, PFN2, EPB41, WASF3, MPP2, MINK1, EFNB2, NETO1, SIPA1L1, PRKAR2B, DLG3, CDH2, STX3, CACNA1C, RGS14, FABP5, TIAM1, SNAP25	ACTN2, CHRND, MEF2C, ANK1, ARHGEF2, AKAP9, DAG1, CAP2, RTN4, CHRNB1, LZTS1, CDK5R1, FXR1, SCRIB, HIP1, RAPSN, CHRNA1, DLG2, PDLIM4, GRIP2, OPHN1, CLSTN2, CPEB4, SSPN, ATP1A1, PALMD, MUSK, P2RX6, MAP4, FZD9
S1 vs S2B	CC	Up	GO:0005911	cell-cell junction	302	39	42	3.4958e-05	0.00100293	0.00782661	0.0638697	SV2A, LAMA1, PMP22, NECTIN1, CLMP, ACTN1, FLNA, ADAM15, PLCG1, FRMD4A, CNN2, AMOT, CD2AP, KAZN, JAG1, CDH24, MYO1E, SHROOM4, KIRREL1, GJC1, KRT8, CNTNAP1, PARD6G, STEAP1, EPHA2, SLC9A1, WNK4, DLG3, CDH2, STX3	JAM3, ARHGEF2, DLL1, CLDN5, AKAP6, KIFC3, CAV3, SIRT2, SGCA, AQP3, DES, SCRIB, BVES, ATP2A2, VAMP5, ATP1A1, JAM2, PGM5, TMEM47, USP53, GJD2, OBSL1, TNK2, NECTIN3, MAPK15, FXYD1, TMEM65, SHROOM2, LIN7B, FGFR4
S1 vs S2B	CC	Up	GO:0030139	endocytic vesicle	222	31	14	3.7849e-05	0.897351	0.0081798	1	WLS, EPN2, CLTA, PTCH1, AP2S1, APOE, AMOT, CD2AP, COLEC12, SCARB1, ZYX, RAB31, MYO1E, HLA-E, RILP, SPHK1, RAB38, UVRAG, ARRB2, CDC42EP4, OCRL, CD74, ANXA3, DAB2IP, LRP1, HBEGF, HLA-DPB1, MDM2, ABCA1, CORO1A	KIF5B, RAPGEF1, DYSF, CD36, MTSS1, HIP1, CDC42EP2, ANXA11, CAMK2D, MYO1C, CAMK2B, RAB5B, SPARC, FMNL1
S1 vs S2B	CC	Up	GO:0030425	dendrite	418	48	49	8.34486e-05	0.0116888	0.0142544	0.374541	ZNF385A, WLS, SV2A, NSMF, NECTIN1, FLNA, DNM1, RGS10, PRR7, ITPKA, ABHD12, SYNGAP1, PTCH1, THY1, APOE, PPT1, MPP2, KIRREL1, RAB27A, MINK1, IGSF9, MLPH, PLK2, SIPA1L1, FZD3, PRKAR2B, PCSK2, DLG3, STX3, NQO1	ACTN2, COBL, N4BP3, ARHGEF2, TTLL7, AKAP9, KIF1B, SORT1, LZTS1, CDK5R1, FXR1, XRN1, MAP1A, PDLIM4, GRIP2, OPHN1, NIN, GABARAPL1, AZIN2, CPEB4, PALMD, P2RX6, MAPK8IP1, RARA, FYN, NECTIN3, TMEM108, GNAZ, NPTN, ROGDI
S1 vs S2B	CC	Up	GO:0097447	dendritic tree	418	48	49	8.34486e-05	0.0116888	0.0142544	0.374541	ZNF385A, WLS, SV2A, NSMF, NECTIN1, FLNA, DNM1, RGS10, PRR7, ITPKA, ABHD12, SYNGAP1, PTCH1, THY1, APOE, PPT1, MPP2, KIRREL1, RAB27A, MINK1, IGSF9, MLPH, PLK2, SIPA1L1, FZD3, PRKAR2B, PCSK2, DLG3, STX3, NQO1	ACTN2, COBL, N4BP3, ARHGEF2, TTLL7, AKAP9, KIF1B, SORT1, LZTS1, CDK5R1, FXR1, XRN1, MAP1A, PDLIM4, GRIP2, OPHN1, NIN, GABARAPL1, AZIN2, CPEB4, PALMD, P2RX6, MAPK8IP1, RARA, FYN, NECTIN3, TMEM108, GNAZ, NPTN, ROGDI
S1 vs S2B	CC	Up	GO:0030666	endocytic vesicle membrane	123	20	5	0.000102312	0.979552	0.0166277	1	WLS, EPN2, PTCH1, AP2S1, APOE, COLEC12, SCARB1, RAB31, HLA-E, RILP, RAB38, OCRL, CD74, ANXA3, LRP1, HBEGF, HLA-DPB1, MDM2, CORO1A, SCARF1	RAPGEF1, CD36, HIP1, CAMK2D, CAMK2B
S1 vs S2B	CC	Up	GO:0009986	cell surface	444	49	55	0.000145361	0.00199134	0.0207959	0.11053	CLMP, ITGA1, ADAM15, THY1, AMOT, TGFBR3, SCARB1, TGFB1, CDH24, FAS, HLA-E, LAYN, ASIC1, TYRO3, CCR10, TNFRSF10B, PROCR, ROBO1, FZD3, EPHA2, SDC1, SLC9A1, IL1R1, TNFRSF10D, CDH2, ADGRG2, IQGAP2, TNFRSF10A, TNFRSF9, CD248	CAV3, SORT1, FOLR1, GPC1, MAP3K5, DAG1, TSPAN33, BCAM, HJV, LMO7, ANXA5, CD36, NCAM1, ADGRA3, VAMP5, ITGA4, KCNH2, CHRNA1, CDH15, CLSTN2, RAMP1, ITGA7, ITGB6, ITGA6, PPFIA4, ENOX2, ANTXR2, MYO18A, EMP2, RARA
S1 vs S2B	CC	Up	GO:0016323	basolateral plasma membrane	131	20	18	0.000366562	0.0308833	0.0376096	0.699435	EPB41, SHROOM4, SLC27A5, SLC9A1, SLC7A6, DLG3, CDH2, SLC19A1, ABCC1, ARRB2, DSP, ATP2B4, ABCC4, MAP4K2, LRP1, ITGA9, GM2A, IL6R, CLDN7, SLC26A6	ERBB3, ANK1, FOLR1, DAG1, AQP3, SCRIB, ERBB2, SLC29A1, DLG2, ATP1A1, ITGA6, ATP2B1, MYO1C, SLC4A2, AQP1, LIN7B, ALPK2, SLC7A7
S1 vs S2B	CC	Up	GO:0042734	presynaptic membrane	86	15	9	0.000500191	0.324555	0.0465888	1	NECTIN1, CLTA, EFNB3, DNM1, CNTNAP1, EFNB2, CDH2, STX3, SNAP25, ATP2B4, NLGN2, PTPRS, GABBR1, RIMS2, GABRA5	SCRIB, HIP1, PSEN2, NPTN, ATP2B1, ROGDI, GRIK1, ZNRF2, KCNH1
S1 vs S2B	CC	Up	GO:0005884	actin filament	90	15	20	0.000552787	3.87154e-05	0.0501333	0.00391296	RAC3, MYO9B, COTL1, ACTN1, FLNA, TPM4, AMOT, CD2AP, SHROOM4, LCP1, PAWR, LMOD1, CORO1A, MYO5A, PLS3	ACTN2, ACTA1, COBL, WIPF3, TMOD1, LDB3, PDLIM3, MYO18B, PDLIM4, SPTBN5, FYN, PALLD, ACTC1, MYO1C, PDLIM5, SH2B2, TPM2, TPM1, RCSD1, ARHGAP6
S1 vs S2B	CC	Up	GO:0043025	neuronal cell body	325	37	42	0.000606037	0.00353802	0.0542363	0.168325	ZNF385A, RAC3, SV2A, NSMF, ITGA1, SRD5A1, FLNA, RGS10, THY1, APOE, PDE1C, PPT1, TGFB1, AKAP12, MAST1, ENO2, CAD, SLC2A3, FZD3, PRKAR2B, CPE, PCSK2, DLG3, NQO1, CACNA1C, TIAM1, PTPRS, RIN1, ANXA3, PTPRF	COBL, ARHGEF2, TTLL7, AKAP9, PVALB, SORT1, SIRT2, RTN4, CDK5R1, FXR1, XRN1, MAP1A, KCNN3, ITGA4, AZIN2, PSEN2, MYOT, P2RX6, PITX3, PDPK1, ATP2B1, ROGDI, CRYAB, EFHC1, KATNB1, RTN4R, WDFY3, CASP3, KISS1, DPYSL5
S1 vs S2B	CC	Up	GO:0005916	fascia adherens	8	4	1	0.000659517	0.46708	0.0567715	1	ACTN1, CDH2, DSP, GJA1	DES
S1 vs S2B	CC	Up	GO:0030424	axon	439	46	52	0.000950932	0.00824941	0.074016	0.297667	RAC3, KCNQ2, NECTIN1, GAP43, ARPC5, DNM1, RGS10, PTCH1, BOC, THY1, NRP2, STMN3, PPT1, TGFB1, TENM3, MINK1, GPRIN1, IGSF9, AP1S1, CNTNAP1, ORAI2, CAD, LPAR3, ROBO1, FZD3, NRG1, DLG3, STX3, TIAM1, SNAP25	COBL, N4BP3, ANK1, PVALB, BIN1, KIF1B, KIF5B, DAG1, SEMA6A, SIRT2, BLOC1S1, NEXN, CDK5R1, MYPN, FXR1, MAP1A, ITGA4, EXOC6, DLG2, OPHN1, NIN, AZIN2, CPEB4, MYOT, HSPB1, MAPK8IP1, MAP4, NECTIN3, TMEM108, PALLD
S1 vs S2B	CC	Up	GO:0005587	collagen type IV trimer	4	3	0	0.000975988	1	0.0748196	1	COL4A1, COL4A2, COL4A6
S1 vs S2B	CC	Up	GO:0098797	plasma membrane protein complex	322	36	62	0.00100873	3.02574e-10	0.0764633	9.31333e-08	KCNQ2, CLTA, ITGA1, ABHD12, AP2S1, KCNG1, TGFBR3, CDH24, SNTB2, GJC1, FAS, HLA-E, KRT8, IGF1, GNAL, DLG3, CDH2, TRAF3, CACNA1C, SNAP25, CD79B, CACHD1, CHRNA5, CD74, CACNB3, GABBR1, GJA1, CDH11, LRP1, HLA-DPB1	RYR1, C5, CACNA2D1, CHRND, STAC3, NPNT, CACNB1, AKAP9, CAV3, DAG1, SGCA, SGCB, KCNE5, CACNA1S, CHRNB1, HJV, SNTB1, SCRIB, KCNF1, ITGA4, KCNH2, HIP1, CHRNA1, CDH15, DLG2, KCNJ6, ABCC9, RAMP1, SSPN, ITGA7
S1 vs S2B	CC	Down	GO:0043292	contractile fiber	191	14	92	0.316085	1.54958e-49	1	3.14796e-45	MMP2, ACTN1, FLNA, TPM4, FBXO22, TMOD3, KRT8, MYOZ3, CACNA1C, LMOD1, ATP2B4, GJA1, MYL9, CSRP1	ACTN2, TNNI2, CASQ2, SMPX, CAVIN4, MYH3, MYLPF, RYR1, LMOD3, TNNT3, TNNC2, LRRC39, CFL2, MYL1, MYOZ2, ACTA1, MYH7, CALM1, ANK1, MYOM1, TCAP, MYH8, NPNT, TNNC1, MYH7B, KLHL40, NEB, HRC, BIN1, MYH2
S1 vs S2B	CC	Down	GO:0030016	myofibril	183	13	87	0.364178	2.44908e-46	1	1.65844e-42	MMP2, ACTN1, FLNA, TPM4, FBXO22, TMOD3, KRT8, MYOZ3, CACNA1C, LMOD1, ATP2B4, MYL9, CSRP1	ACTN2, TNNI2, CASQ2, SMPX, CAVIN4, MYH3, RYR1, LMOD3, TNNT3, TNNC2, LRRC39, CFL2, MYL1, MYOZ2, ACTA1, MYH7, CALM1, ANK1, MYOM1, TCAP, MYH8, TNNC1, MYH7B, KLHL40, NEB, HRC, BIN1, MYH2, SYNPO2L, CAV3
S1 vs S2B	CC	Down	GO:0030017	sarcomere	166	13	81	0.249274	3.9443e-44	1	2.00321e-40	MMP2, ACTN1, FLNA, TPM4, FBXO22, TMOD3, KRT8, MYOZ3, CACNA1C, LMOD1, ATP2B4, MYL9, CSRP1	ACTN2, TNNI2, CASQ2, SMPX, CAVIN4, MYH3, RYR1, LMOD3, TNNT3, TNNC2, LRRC39, CFL2, MYL1, MYOZ2, ACTA1, MYH7, CALM1, ANK1, MYOM1, TCAP, MYH8, TNNC1, KLHL40, NEB, HRC, BIN1, MYH2, SYNPO2L, CAV3, MYOM3
S1 vs S2B	CC	Down	GO:0031674	I band	116	9	56	0.321384	2.9645e-30	1	5.47489e-27	ACTN1, FLNA, FBXO22, KRT8, MYOZ3, CACNA1C, ATP2B4, MYL9, CSRP1	ACTN2, CASQ2, CAVIN4, RYR1, CFL2, MYOZ2, MYH7, ANK1, MYOM1, TCAP, KLHL40, NEB, HRC, BIN1, SYNPO2L, CAV3, MYOM3, CACNA1S, TRIM54, FBXL22, ITGB1BP2, NEXN, MYPN, DES, LDB3, PDLIM3, SYNPO2, JPH1, MYO18B, TTN
S1 vs S2B	CC	Down	GO:0030018	Z disc	106	9	51	0.235134	1.46008e-27	1	1.74479e-24	ACTN1, FLNA, FBXO22, KRT8, MYOZ3, CACNA1C, ATP2B4, MYL9, CSRP1	ACTN2, CASQ2, CAVIN4, RYR1, CFL2, MYOZ2, MYH7, ANK1, MYOM1, TCAP, NEB, HRC, BIN1, SYNPO2L, CAV3, MYOM3, TRIM54, FBXL22, ITGB1BP2, NEXN, MYPN, DES, LDB3, PDLIM3, SYNPO2, JPH1, MYO18B, TTN, CSRP3, MYBPC2
S1 vs S2B	CC	Down	GO:0015629	actin cytoskeleton	415	33	93	0.114064	1.50334e-19	0.82428	1.17463e-16	RAC3, MYO9B, COTL1, SLC9A3R1, ACTN1, ARPC5, FLNA, TPM4, CAP1, CNN2, AMOT, CD2AP, ZYX, MYO1E, TMOD3, SHROOM4, SH3PXD2B, RHOU, MLPH, LCP1, MYOZ3, PAWR, MYH9, CDH2, IQGAP2, CDC42EP4, LMOD1, ADD2, MYL9, CORO1A	XIRP1, ACTN2, TNNI2, MYH3, MYLPF, LMOD3, TNNT3, TNNC2, CFL2, MYL1, MYOZ2, ACTA1, COBL, MYH7, ARHGEF2, MYOM1, LAD1, MYH8, TNNC1, WIPF3, CLDN5, NEB, PVALB, ABLIM3, BIN1, MYH2, SYNPO2L, CAP2, MYOM3, MACF1
S1 vs S2B	CC	Down	GO:0042383	sarcolemma	102	9	40	0.212674	9.02189e-18	1	5.55393e-15	KRT8, SLC9A1, COL6A3, CDH2, CACNA1C, SLC8B1, STAC, ATP2B4, CACNB3	CAVIN4, RYR1, CACNA2D1, TRIM72, STAC3, ANK1, CACNB1, AKAP6, BIN1, CAV3, DAG1, SGCA, DYSF, SGCB, POPDC3, CACNA1S, DES, SNTB1, BVES, PPP3CB, ABCC9, SSPN, ATP1A1, OBSCN, MYOT, CACNG6, FLNC, PGM5, CAMK2D, FXYD1
S1 vs S2B	CC	Down	GO:0005865	striated muscle thin filament	26	3	20	0.218006	1.71022e-17	1	9.92662e-15	TPM4, TMOD3, LMOD1	TNNI2, LMOD3, TNNT3, TNNC2, ACTA1, MYOM1, TNNC1, MYOM3, TMOD1, TTN, TNNI1, MYBPC2, MYBPC1, TNNT2, TNNT1, OBSL1, TNNI3, TPM2, TPM1, FHOD3
S1 vs S2B	CC	Down	GO:0036379	myofilament	27	3	20	0.239314	7.34932e-17	1	4.14726e-14	TPM4, TMOD3, LMOD1	TNNI2, LMOD3, TNNT3, TNNC2, ACTA1, MYOM1, TNNC1, MYOM3, TMOD1, TTN, TNNI1, MYBPC2, MYBPC1, TNNT2, TNNT1, OBSL1, TNNI3, TPM2, TPM1, FHOD3
S1 vs S2B	CC	Down	GO:0016529	sarcoplasmic reticulum	54	3	27	0.700922	2.10242e-15	1	1.01692e-12	MRVI1, ITPR2, P3H2	TMEM38A, CASQ2, SRL, MRLN, RYR1, CACNA2D1, ANK1, TMEM38B, AKAP6, HRC, ATP2A1, DMPK, JPH1, MANF, ATP2A2, KLHL41, CMYA5, NOL3, SLN, CAMK2D, TMEM109, JSRP1, JPH2, CAMK2B, SGCD, RTN2, THBS1
S1 vs S2B	CC	Down	GO:0016528	sarcoplasm	63	3	29	0.787231	2.24405e-15	1	1.06018e-12	MRVI1, ITPR2, P3H2	TMEM38A, CASQ2, SRL, MRLN, RYR1, CACNA2D1, MEF2C, ANK1, TMEM38B, AKAP6, HRC, ATP2A1, DMPK, JPH1, MANF, ATP2A2, KLHL41, CMYA5, NOL3, FLNC, SLN, CAMK2D, TMEM109, JSRP1, JPH2, CAMK2B, SGCD, RTN2, THBS1
S1 vs S2B	CC	Down	GO:0033017	sarcoplasmic reticulum membrane	28	1	17	0.848954	4.34388e-12	1	1.54817e-09	ITPR2	TMEM38A, CASQ2, MRLN, RYR1, TMEM38B, AKAP6, ATP2A1, DMPK, JPH1, ATP2A2, KLHL41, SLN, CAMK2D, TMEM109, JSRP1, JPH2, CAMK2B
S1 vs S2B	CC	Down	GO:0031672	A band	30	0	17	1	2.73728e-11	1	9.26798e-09		SMPX, LMOD3, LRRC39, ANK1, MYOM1, KLHL40, MYOM3, MYL4, TTN, MYBPC2, KLHL41, MYBPC1, CMYA5, OBSCN, MYL3, OBSL1, CRYAB
S1 vs S2B	CC	Down	GO:0031430	M band	22	0	14	1	2.00791e-10	1	6.47471e-08		SMPX, LMOD3, LRRC39, ANK1, MYOM1, MYOM3, TTN, MYBPC2, KLHL41, MYBPC1, CMYA5, OBSCN, OBSL1, CRYAB
S1 vs S2B	CC	Down	GO:1902495	transmembrane transporter complex	143	18	38	0.00698691	2.08789e-10	0.236172	6.52547e-08	KCNQ2, GABRB3, ABHD12, KCNG1, PIDD1, SLC9A1, DLG3, CACNA1C, SNAP25, CLCN2, CACHD1, CHRNA5, CACNB3, OLFM2, GABRE, GABRA5, SLC26A6, SHANK3	CASQ2, RYR1, CACNA2D1, CHRND, STAC3, CALM1, CACNB1, AKAP9, AKAP6, MCUB, KCNE5, CACNA1S, ATP2A1, MCU, CHRNB1, HERPUD1, SMDT1, SCRIB, KCNF1, KCNH2, MICU1, CHRNA1, DLG2, KCNJ6, ABCC9, ATP1A1, BEST3, CACNG6, VAMP2, FXYD1
S1 vs S2B	CC	Down	GO:0098797	plasma membrane protein complex	322	36	62	0.00100873	3.02574e-10	0.0764633	9.31333e-08	KCNQ2, CLTA, ITGA1, ABHD12, AP2S1, KCNG1, TGFBR3, CDH24, SNTB2, GJC1, FAS, HLA-E, KRT8, IGF1, GNAL, DLG3, CDH2, TRAF3, CACNA1C, SNAP25, CD79B, CACHD1, CHRNA5, CD74, CACNB3, GABBR1, GJA1, CDH11, LRP1, HLA-DPB1	RYR1, C5, CACNA2D1, CHRND, STAC3, NPNT, CACNB1, AKAP9, CAV3, DAG1, SGCA, SGCB, KCNE5, CACNA1S, CHRNB1, HJV, SNTB1, SCRIB, KCNF1, ITGA4, KCNH2, HIP1, CHRNA1, CDH15, DLG2, KCNJ6, ABCC9, RAMP1, SSPN, ITGA7
S1 vs S2B	CC	Down	GO:0034702	ion channel complex	134	17	36	0.00810488	4.70051e-10	0.257267	1.40428e-07	KCNQ2, GABRB3, ABHD12, KCNG1, PIDD1, DLG3, CACNA1C, SNAP25, CLCN2, CACHD1, CHRNA5, CACNB3, OLFM2, GABRE, GABRA5, SLC26A6, SHANK3	CASQ2, RYR1, CACNA2D1, CHRND, STAC3, CALM1, CACNB1, AKAP9, AKAP6, MCUB, KCNE5, CACNA1S, ATP2A1, MCU, CHRNB1, HERPUD1, SMDT1, SCRIB, KCNF1, KCNH2, MICU1, CHRNA1, DLG2, KCNJ6, ABCC9, BEST3, CACNG6, VAMP2, PRKACA, CACNA1H
S1 vs S2B	CC	Down	GO:0034703	cation channel complex	99	9	30	0.221023	6.44998e-10	1	1.899e-07	KCNQ2, ABHD12, KCNG1, DLG3, CACNA1C, SNAP25, CACHD1, CACNB3, OLFM2	CASQ2, RYR1, CACNA2D1, STAC3, CALM1, CACNB1, AKAP9, AKAP6, MCUB, KCNE5, CACNA1S, ATP2A1, MCU, HERPUD1, SMDT1, KCNF1, KCNH2, MICU1, DLG2, KCNJ6, ABCC9, CACNG6, VAMP2, PRKACA, CACNA1H, EPS8, GRIK1, KCNJ2, UNC80, KCNH1
S1 vs S2B	CC	Down	GO:0005861	troponin complex	8	0	8	1	9.13053e-10	1	2.64981e-07		TNNI2, TNNT3, TNNC2, TNNC1, TNNI1, TNNT2, TNNT1, TNNI3
S1 vs S2B	CC	Down	GO:1990351	transporter complex	151	18	38	0.0116714	1.09312e-09	0.308991	3.08426e-07	KCNQ2, GABRB3, ABHD12, KCNG1, PIDD1, SLC9A1, DLG3, CACNA1C, SNAP25, CLCN2, CACHD1, CHRNA5, CACNB3, OLFM2, GABRE, GABRA5, SLC26A6, SHANK3	CASQ2, RYR1, CACNA2D1, CHRND, STAC3, CALM1, CACNB1, AKAP9, AKAP6, MCUB, KCNE5, CACNA1S, ATP2A1, MCU, CHRNB1, HERPUD1, SMDT1, SCRIB, KCNF1, KCNH2, MICU1, CHRNA1, DLG2, KCNJ6, ABCC9, ATP1A1, BEST3, CACNG6, VAMP2, FXYD1
S1 vs S2B	MF	Up	GO:0038023	signaling receptor activity	465	67	55	9.164e-10	0.0111436	4.65417e-06	0.362211	LEF1, GABRB3, PRTG, NECTIN1, EFNB3, RARG, PTCH1, NRP2, AMOT, NR6A1, TGFBR3, SCARB1, GPR162, PEAR1, FAS, S1PR3, HMCN1, AGTRAP, NR2F1, CNTNAP1, EFNA4, LPAR3, TYRO3, CCR10, TNFRSF10B, PROCR, SLC1A5, ROBO1, SPHK1, FZD3	ERBB3, CHRND, GPR153, SORT1, FOLR1, BCAM, CHRNB1, HJV, PLXNA1, DDR1, CD36, ERBB2, ADGRA3, ITGA4, CHRNA1, ABCC9, IL20RA, RAMP1, NPY, ITGB6, MUSK, MYOT, PTPRD, P2RX6, ADIPOR1, ANTXR2, LRP5, RARA, OPN3, FZD9
S1 vs S2B	MF	Up	GO:0060089	molecular transducer activity	465	67	55	9.164e-10	0.0111436	4.65417e-06	0.362211	LEF1, GABRB3, PRTG, NECTIN1, EFNB3, RARG, PTCH1, NRP2, AMOT, NR6A1, TGFBR3, SCARB1, GPR162, PEAR1, FAS, S1PR3, HMCN1, AGTRAP, NR2F1, CNTNAP1, EFNA4, LPAR3, TYRO3, CCR10, TNFRSF10B, PROCR, SLC1A5, ROBO1, SPHK1, FZD3	ERBB3, CHRND, GPR153, SORT1, FOLR1, BCAM, CHRNB1, HJV, PLXNA1, DDR1, CD36, ERBB2, ADGRA3, ITGA4, CHRNA1, ABCC9, IL20RA, RAMP1, NPY, ITGB6, MUSK, MYOT, PTPRD, P2RX6, ADIPOR1, ANTXR2, LRP5, RARA, OPN3, FZD9
S1 vs S2B	MF	Up	GO:0004888	transmembrane signaling receptor activity	345	48	45	8.45919e-07	0.00385689	0.000687393	0.178888	GABRB3, EFNB3, PTCH1, NRP2, TGFBR3, GPR162, FAS, S1PR3, AGTRAP, EFNA4, LPAR3, TYRO3, CCR10, ROBO1, SPHK1, FZD3, EPHA2, IL1R1, TNFRSF10D, ADGRG2, TNFRSF10A, EDNRA, CLEC1A, GPR19, IL27RA, NPR3, FZD10, CD79B, CHRNA5, CD74	ERBB3, CHRND, GPR153, SORT1, BCAM, CHRNB1, HJV, PLXNA1, DDR1, ERBB2, ADGRA3, CHRNA1, ABCC9, IL20RA, RAMP1, NPY, MUSK, MYOT, PTPRD, P2RX6, ANTXR2, LRP5, OPN3, FZD9, LPAR4, NGFR, TGFBR2, FGFR4, IFNAR2, PTPRR
S1 vs S2B	MF	Up	GO:0090482	vitamin transmembrane transporter activity	15	7	0	3.43822e-05	1	0.00782661	1	CD320, SLC25A32, SLC2A8, SLC19A1, ABCC1, SLC25A19, SLC5A6
S1 vs S2B	MF	Up	GO:0030545	receptor regulator activity	225	31	31	6.3164e-05	0.00487482	0.0113936	0.208488	METRNL, KITLG, LYPD1, GDF11, VGF, LY6E, CD320, METRN, JAG1, TGFB1, NAMPT, CXCL14, IL24, IGF1, GDF6, DKK2, GREM1, NRG1, NPPB, BMP7, PRKCE, C1QTNF4, CCL2, TGFB2, ADM, HBEGF, BMP1, CSF1, IL6R, NGF	IL17B, C5, SEMA3E, SEMA6A, MSTN, IL34, MANF, FNDC5, SEMA6B, FGF5, NPY, CDC42EP2, SCT, WNT9A, SEMA6C, WNT2, TNFSF13B, VEGFC, GREM2, JAG2, IGF2.1, STC2, CCL20, ERFE, FST, FGF7, FGF13, FGF9, TGFB3, EPHA7
S1 vs S2B	MF	Up	GO:0008083	growth factor activity	84	16	11	8.99139e-05	0.0966536	0.0150959	1	KITLG, GDF11, VGF, CD320, JAG1, TGFB1, IGF1, GDF6, NRG1, BMP7, TGFB2, HBEGF, BMP1, CSF1, IL6R, NGF	MSTN, IL34, MANF, FGF5, VEGFC, JAG2, IGF2.1, FGF7, FGF13, FGF9, TGFB3
S1 vs S2B	MF	Up	GO:0005516	calmodulin binding	148	23	23	9.26337e-05	0.00340759	0.0152996	0.163653	MKNK2, KCNQ2, MYO9B, CNN1, GAP43, ITPKA, PCP4, CNN2, PDE1C, EPB41, SNTB2, MYO1E, FAS, SPHK1, MYH9, SLC9A1, IQGAP2, CACNA1C, ITPKB, CAMK1, ATP2B4, ADD2, MYO5A	MYH3, ARPP21, RYR1, MYH7, MYH8, MYH2, CACNA1S, SNTB1, TTN, KCNN3, PPP3CB, OBSCN, RGS2, MYO5B, VAMP2, CAMK2D, NGFR, ATP2B1, MYO1C, CAMK2B, SPTAN1, SNTA1, KCNH1
S1 vs S2B	MF	Up	GO:0043394	proteoglycan binding	26	8	3	0.000127985	0.35448	0.0191177	1	SLIT2, APOE, CTSB, TNC, AGRN, PTPRS, PTPRF, LRP1	CFH, FST, THBS1
S1 vs S2B	MF	Up	GO:0030246	carbohydrate binding	135	21	13	0.000140254	0.338344	0.0204983	1	NECTIN1, SORD, P3H3, G6PD, COLEC12, CRYBG2, LGALSL, ASGR1, GNPNAT1, RPIA, LAYN, VCAN, SLC2A3, SLC2A8, ENPP2, CLEC1A, CD248, SCARA3, ATRNL1, FBXO2, P3H2	EGLN3, UGP2, GYS1, GALK1, P4HA2, MGAT2, FUOM, P4HA3, BCAN, LGALS1, GALNT7, NPTX2, PPP1R3F
S1 vs S2B	MF	Up	GO:0005125	cytokine activity	87	16	10	0.000151088	0.206134	0.0214639	1	KITLG, GDF11, TGFB1, NAMPT, CXCL14, IL24, GDF6, GREM1, NRG1, BMP7, C1QTNF4, CCL2, TGFB2, BMP1, CSF1, CD70	IL17B, C5, MSTN, IL34, WNT2, TNFSF13B, GREM2, CCL20, TGFB3, IL15
S1 vs S2B	MF	Up	GO:0030546	signaling receptor activator activity	204	28	30	0.000162337	0.00223895	0.0225882	0.121616	METRNL, KITLG, GDF11, VGF, CD320, METRN, JAG1, TGFB1, NAMPT, CXCL14, IL24, IGF1, GDF6, GREM1, NRG1, NPPB, BMP7, PRKCE, C1QTNF4, CCL2, TGFB2, ADM, HBEGF, BMP1, CSF1, IL6R, NGF, CD70	IL17B, C5, SEMA3E, SEMA6A, MSTN, IL34, MANF, FNDC5, SEMA6B, FGF5, NPY, CDC42EP2, SCT, WNT9A, SEMA6C, WNT2, TNFSF13B, VEGFC, GREM2, JAG2, IGF2.1, STC2, CCL20, ERFE, FGF7, FGF13, FGF9, TGFB3, EPHA7, IL15
S1 vs S2B	MF	Up	GO:0048018	receptor ligand activity	200	27	30	0.000273556	0.0016184	0.0324987	0.0952982	METRNL, KITLG, GDF11, VGF, CD320, METRN, JAG1, TGFB1, NAMPT, CXCL14, IL24, IGF1, GDF6, GREM1, NRG1, NPPB, BMP7, C1QTNF4, CCL2, TGFB2, ADM, HBEGF, BMP1, CSF1, IL6R, NGF, CD70	IL17B, C5, SEMA3E, SEMA6A, MSTN, IL34, MANF, FNDC5, SEMA6B, FGF5, NPY, CDC42EP2, SCT, WNT9A, SEMA6C, WNT2, TNFSF13B, VEGFC, GREM2, JAG2, IGF2.1, STC2, CCL20, ERFE, FGF7, FGF13, FGF9, TGFB3, EPHA7, IL15
S1 vs S2B	MF	Up	GO:0005509	calcium ion binding	394	44	66	0.000287939	2.42442e-08	0.0330479	5.66115e-06	F12, LPCAT1, SLIT2, NKD1, ACTN1, SLC25A13, TPM4, CD320, PCP4, PLCG1, JAG1, CDH24, HMCN1, LCP1, VCAN, AGRN, VWCE, CDH2, ENPP2, CD248, SCARA3, NID2, TENM2, MAN1A1, PLCB4, ANXA3, PCDH18, CDH11, CRB2, PITPNM1	ACTN2, CASQ2, MYLPF, RYR1, TNNT3, TNNC2, MYL1, CALM1, NPNT, TNNC1, DLL1, PVALB, HRC, DAG1, SGCA, MACF1, DYSF, ATP2A1, MYL4, PPP2R3B, ITGB1BP2, CDK5R1, TTN, ANXA5, DLK1, CRELD1, ATP2A2, PON1, MICU1, CDH15
S1 vs S2B	MF	Up	GO:0045569	TRAIL binding	3	3	0	0.000300917	1	0.0337742	1	TNFRSF10B, TNFRSF10D, TNFRSF10A
S1 vs S2B	MF	Up	GO:0005126	cytokine receptor binding	149	22	15	0.000315099	0.298438	0.034309	1	KITLG, GDF11, PLCG1, TGFBR3, CD2AP, TGFB1, SOCS2, CXCL14, PIDD1, GDF6, GREM1, BMP7, TRAF3, CCL2, TGFB2, DAB2IP, IL1RAP, CSF1, BAMBI, IL6R, NGF, CD70	C5, MSTN, IL34, JAK1, NOL3, TRAF5, SPRED2, TNFSF13B, VEGFC, TGFBR2, CASP3, CCL20, TGFB3, TRAF6, IL15
S1 vs S2B	MF	Up	GO:0005114	type II transforming growth factor beta receptor binding	7	4	1	0.000557438	0.465327	0.0503305	1	TGFBR3, TGFB1, TGFB2, BAMBI	TGFB3
S1 vs S2B	MF	Up	GO:0016917	GABA receptor activity	7	4	0	0.00063844	1	0.055872	1	GABRB3, GABBR1, GABRE, GABRA5
S1 vs S2B	MF	Up	GO:0005005	transmembrane-ephrin receptor activity	12	5	1	0.00076346	0.670539	0.0642737	1	EFNB3, EFNA4, EPHA2, EPHB4, EFNA3	EPHA7
S1 vs S2B	MF	Up	GO:0005201	extracellular matrix structural constituent	113	17	12	0.000855042	0.232407	0.0692039	1	LAMA1, TNC, HMCN1, HAPLN1, VCAN, AGRN, COL4A1, COL6A3, POSTN, COL7A1, NID2, MXRA5, COL23A1, COL4A2, FBN2, COL4A6, MFAP2	NPNT, CRELD1, COL8A1, COL19A1, LAMA5, HSPG2, MATN3, MFAP5, SPARC, THBS2, TNXB, THBS1
S1 vs S2B	MF	Up	GO:0005003	ephrin receptor activity	13	5	1	0.00112731	0.696491	0.0803554	1	EFNB3, EFNA4, EPHA2, EPHB4, EFNA3	EPHA7
S1 vs S2B	MF	Down	GO:0003779	actin binding	345	36	92	0.0027429	7.73676e-25	0.143244	7.85862e-22	MYO9B, COTL1, ACTN1, CNN1, ARPC5, FLNA, TPM4, CAP1, CNN2, PFN2, EPB41, WASF3, SNTB2, MYO1E, TMOD3, SHROOM4, MLPH, FXYD5, LCP1, MYOZ3, PAWR, MYH9, FMNL2, DIXDC1, IQGAP2, PRKCE, TAGLN, LMOD1, ADD2, SSFA2	XIRP1, ACTN2, TNNI2, MYH3, LMOD3, TNNT3, TNNC2, CFL2, MYOZ2, COBL, MYH7, MYOM1, MYH8, TNNC1, WIPF3, MYH7B, VASH2, NEB, ABLIM3, CORO7, BIN1, MYH2, SYNPO2L, DAG1, CAP2, MYOM3, MACF1, SYNE3, MYL4, TMOD1
S1 vs S2B	MF	Down	GO:0008307	structural constituent of muscle	40	3	29	0.463795	1.80466e-23	1	1.7215e-20	TPM4, MYL9, CSRP1	ACTN2, MYLPF, MYL1, MYOM1, TCAP, MYBPH, MYH8, NEB, DAG1, MYOM3, NEXN, PDLIM3, JPH1, TTN, CSRP3, MYBPC2, MYBPC1, MYL6B, MYL5, OBSCN, MYL3, MYOT, OBSL1, ANKRD2, DMD, TPM2, SORBS2, TPM1, CSRP2
S1 vs S2B	MF	Down	GO:0042805	actinin binding	33	2	19	0.642955	8.71001e-13	1	3.40277e-10	CACNA1C, CSRP1	MYOM1, DAG1, MYOM3, MYPN, LDB3, PDLIM3, SYNPO2, TTN, CSRP3, MYBPC2, MYBPC1, PDLIM4, MYOT, XIRP2, RARA, OBSL1, PALLD, PDLIM5, CSRP2
S1 vs S2B	MF	Down	GO:0051015	actin filament binding	161	16	43	0.0496396	1.67286e-12	0.650526	6.17893e-10	COTL1, ACTN1, ARPC5, FLNA, TPM4, MYO1E, SHROOM4, LCP1, MYH9, IQGAP2, TAGLN, ADD2, SSFA2, CORO1A, MYO5A, PLS3	XIRP1, ACTN2, MYH3, TNNC2, CFL2, MYH7, MYOM1, MYH8, TNNC1, WIPF3, MYH7B, NEB, ABLIM3, CORO7, BIN1, MYH2, MYOM3, MACF1, SYNE3, MYL4, TMOD1, NEXN, CDK5R1, TTN, MYBPC2, HIP1, MYBPC1, MYO5B, CORO6, ANXA6
S1 vs S2B	MF	Down	GO:0051393	alpha-actinin binding	27	1	17	0.83876	1.89805e-12	1	6.88552e-10	CACNA1C	MYOM1, DAG1, MYOM3, MYPN, LDB3, PDLIM3, SYNPO2, TTN, MYBPC2, MYBPC1, PDLIM4, MYOT, XIRP2, RARA, OBSL1, PALLD, PDLIM5
S1 vs S2B	MF	Down	GO:0051371	muscle alpha-actinin binding	18	0	13	1	4.12704e-11	1	1.37444e-08		MYOM1, MYOM3, MYPN, LDB3, PDLIM3, SYNPO2, TTN, MYBPC2, MYBPC1, PDLIM4, OBSL1, PALLD, PDLIM5
S1 vs S2B	MF	Down	GO:0005509	calcium ion binding	394	44	66	0.000287939	2.42442e-08	0.0330479	5.66115e-06	F12, LPCAT1, SLIT2, NKD1, ACTN1, SLC25A13, TPM4, CD320, PCP4, PLCG1, JAG1, CDH24, HMCN1, LCP1, VCAN, AGRN, VWCE, CDH2, ENPP2, CD248, SCARA3, NID2, TENM2, MAN1A1, PLCB4, ANXA3, PCDH18, CDH11, CRB2, PITPNM1	ACTN2, CASQ2, MYLPF, RYR1, TNNT3, TNNC2, MYL1, CALM1, NPNT, TNNC1, DLL1, PVALB, HRC, DAG1, SGCA, MACF1, DYSF, ATP2A1, MYL4, PPP2R3B, ITGB1BP2, CDK5R1, TTN, ANXA5, DLK1, CRELD1, ATP2A2, PON1, MICU1, CDH15
S1 vs S2B	MF	Down	GO:0099094	ligand-gated cation channel activity	39	3	15	0.498066	4.40635e-07	1	7.99242e-05	ASIC1, CHRNA5, ITPR2	RYR1, CHRND, CHRNB1, JPH1, KCNH2, CHRNA1, KCNJ6, P2RX6, AQP1, SHROOM2, JPH2, GRIK1, CHRNG, KCNJ2, P2RX5
S1 vs S2B	MF	Down	GO:0015276	ligand-gated ion channel activity	46	6	16	0.0856948	8.02703e-07	0.712006	0.000131507	GABRB3, ASIC1, CHRNA5, ITPR2, GABRE, GABRA5	RYR1, CHRND, CHRNB1, JPH1, KCNH2, CHRNA1, KCNJ6, P2RX6, ANXA6, AQP1, SHROOM2, JPH2, GRIK1, CHRNG, KCNJ2, P2RX5
S1 vs S2B	MF	Down	GO:0022834	ligand-gated channel activity	46	6	16	0.0856948	8.02703e-07	0.712006	0.000131507	GABRB3, ASIC1, CHRNA5, ITPR2, GABRE, GABRA5	RYR1, CHRND, CHRNB1, JPH1, KCNH2, CHRNA1, KCNJ6, P2RX6, ANXA6, AQP1, SHROOM2, JPH2, GRIK1, CHRNG, KCNJ2, P2RX5
S1 vs S2B	MF	Down	GO:0005261	cation channel activity	138	10	30	0.430786	1.59392e-06	1	0.000234642	KCNQ2, KCNG1, ORAI2, ASIC1, CACNA1C, SNAP25, CACHD1, CHRNA5, CACNB3, ITPR2	TMEM38A, RYR1, CACNA2D1, CHRND, TMEM38B, CACNB1, KCNE5, CACNA1S, MCU, CHRNB1, JPH1, KCNF1, KCNN3, KCNH2, CHRNA1, KCNJ6, ABCC9, CACNG6, P2RX6, ANXA6, AQP1, SHROOM2, CACNA1H, JPH2, GRIK1, CHRNG, KCNJ2, UNC80, KCNH1, P2RX5
S1 vs S2B	MF	Down	GO:0031432	titin binding	10	0	7	1	2.32253e-06	1	0.000327654		ACTN2, CALM1, TCAP, MYBPC1, OBSCN, CAMK2D, ANKRD2
S1 vs S2B	MF	Down	GO:0015267	channel activity	194	20	36	0.0319273	7.50137e-06	0.513949	0.000918014	KCNQ2, GABRB3, KCNG1, GJC1, PIDD1, ORAI2, ASIC1, STEAP1, CACNA1C, SNAP25, CLCN2, CACHD1, CHRNA5, CACNB3, GJA1, ITPR2, GABRE, GABRA5, BCL2, SLC26A6	TMEM38A, RYR1, CLCN5, CACNA2D1, CHRND, TMEM38B, CACNB1, AQP3, KCNE5, CACNA1S, MCU, CHRNB1, JPH1, KCNF1, KCNN3, KCNH2, CHRNA1, KCNJ6, ABCC9, BEST3, CACNG6, P2RX6, ANXA6, FXYD1, TMEM109, AQP1, SHROOM2, CACNA1H, JPH2, GRIK1
S1 vs S2B	MF	Down	GO:0022803	passive transmembrane transporter activity	194	20	36	0.0319273	7.50137e-06	0.513949	0.000918014	KCNQ2, GABRB3, KCNG1, GJC1, PIDD1, ORAI2, ASIC1, STEAP1, CACNA1C, SNAP25, CLCN2, CACHD1, CHRNA5, CACNB3, GJA1, ITPR2, GABRE, GABRA5, BCL2, SLC26A6	TMEM38A, RYR1, CLCN5, CACNA2D1, CHRND, TMEM38B, CACNB1, AQP3, KCNE5, CACNA1S, MCU, CHRNB1, JPH1, KCNF1, KCNN3, KCNH2, CHRNA1, KCNJ6, ABCC9, BEST3, CACNG6, P2RX6, ANXA6, FXYD1, TMEM109, AQP1, SHROOM2, CACNA1H, JPH2, GRIK1
S1 vs S2B	MF	Down	GO:0022836	gated channel activity	129	13	27	0.090257	1.32557e-05	0.731964	0.0015052	KCNQ2, GABRB3, KCNG1, ASIC1, CACNA1C, SNAP25, CLCN2, CACHD1, CHRNA5, CACNB3, ITPR2, GABRE, GABRA5	RYR1, CLCN5, CACNA2D1, CHRND, CACNB1, KCNE5, CACNA1S, CHRNB1, JPH1, KCNF1, KCNN3, KCNH2, CHRNA1, KCNJ6, CACNG6, P2RX6, ANXA6, TMEM109, AQP1, SHROOM2, CACNA1H, JPH2, GRIK1, CHRNG, KCNJ2, KCNH1, P2RX5
S1 vs S2B	MF	Down	GO:0005198	structural molecule activity	489	41	66	0.0246696	1.32627e-05	0.444026	0.0015052	LAMA1, CLTA, SORBS3, ACTN1, ARPC5, TPM4, APOE, EPB41, CD2AP, GNL1, JAG1, NUP153, SNTB2, TNC, HMCN1, HAPLN1, VCAN, AGRN, COL4A1, COL6A3, DLG3, POSTN, NUP205, CLDN6, DSP, COL7A1, ADD2, NID2, DNM3, KRT18	ACTN2, SEPT4, MYLPF, MYL1, ACTA1, ANK1, MYOM1, TCAP, MYBPH, LAD1, MYH8, NPNT, CLDN5, NEB, CAV3, DAG1, TUBA4A, MYOM3, MACF1, NEXN, NUP93, DES, PDLIM3, JPH1, SNTB1, TTN, MAP1A, CSRP3, MYBPC2, BVES
S1 vs S2B	MF	Down	GO:0015079	potassium ion transmembrane transporter activity	58	4	16	0.560269	2.66861e-05	1	0.00286459	KCNQ2, KCNG1, SLC9A1, SNAP25	TMEM38A, TMEM38B, KCNE5, KCNF1, KCNN3, KCNH2, KCNJ6, ABCC9, ATP1A1, AQP1, SLC12A2, SLC12A7, GRIK1, KCNJ2, SLC9A7, KCNH1
S1 vs S2B	MF	Down	GO:0005216	ion channel activity	181	17	33	0.0924882	2.7501e-05	0.741366	0.00290981	KCNQ2, GABRB3, KCNG1, GJC1, PIDD1, ORAI2, ASIC1, CACNA1C, SNAP25, CLCN2, CACHD1, CHRNA5, CACNB3, ITPR2, GABRE, GABRA5, SLC26A6	TMEM38A, RYR1, CLCN5, CACNA2D1, CHRND, TMEM38B, CACNB1, KCNE5, CACNA1S, MCU, CHRNB1, JPH1, KCNF1, KCNN3, KCNH2, CHRNA1, KCNJ6, ABCC9, BEST3, CACNG6, P2RX6, ANXA6, FXYD1, AQP1, SHROOM2, CACNA1H, JPH2, GRIK1, CHRNG, KCNJ2
S1 vs S2B	MF	Down	GO:0031014	troponin T binding	4	0	4	1	3.34481e-05	1	0.00343181		TNNI2, TNNC1, TNNT1, TNNI3
S1 vs S2B	MF	Down	GO:0016247	channel regulator activity	83	8	19	0.170665	4.75057e-05	0.945478	0.0046176	SLC9A3R1, FLNA, FXYD5, WNK4, PACSIN3, ATP2B4, CACNB3, BCL2	CALM1, AKAP9, MCUB, CAV3, KCNE5, PRKG1, ABCC9, NPY, CACNG6, TNNI3, CAMK2D, FXYD1, NEDD4, PKP2, ADRB2, SNTA1, RASA1, FGF13, TSPAN13
S1 vs S2B	KEGG	Up	hsa04060	Cytokine-cytokine receptor interaction	116	23	13	2.1364e-05	0.212964	0.00717829	0.880183	GDF11, TGFB1, FAS, CXCL14, IL24, CCR10, TNFRSF10B, GDF6, IL1R1, TNFRSF10D, BMP7, TNFRSF10A, TNFRSF9, IL27RA, CCL2, TGFB2, IL1RAP, RELT, CSF1, IL6R, IL2RB, NGF, CD70	IL17B, MSTN, IL34, IL20RA, TNFSF13B, NGFR, TGFBR2, IFNAR2, IL11RA, CCL20, TGFB3, ACKR3, IL15
S1 vs S2B	KEGG	Up	hsa04061	Viral protein interaction with cytokine and cytokine receptor	33	10	4	0.000111985	0.313583	0.0188135	1	CXCL14, IL24, CCR10, TNFRSF10B, TNFRSF10D, TNFRSF10A, CCL2, CSF1, IL6R, IL2RB	IL34, IL20RA, CCL20, ACKR3
S1 vs S2B	KEGG	Up	hsa04390	Hippo signaling pathway	130	22	13	0.0001857	0.286692	0.0198856	0.979208	LEF1, NKD1, GLI2, WNT2B, ID1, AXIN2, AMOT, TGFB1, PARD6G, WNT16, GDF6, SNAI2, FZD3, WWC1, DLG3, BMP7, BBC3, MYC, AXIN1, FZD10, TGFB2, CRB2	CCND3, WWTR1, TEAD4, SCRIB, DLG2, STK3, WNT9A, SMAD1, FZD9, WNT2, TGFBR2, FZD1, TGFB3
S1 vs S2B	KEGG	Up	hsa04659	Th17 cell differentiation	70	15	5	0.000236733	0.745059	0.0198856	1	PLCG1, MAPK12, NFKBIA, TGFB1, FOS, JUN, IL1R1, STAT5B, IL27RA, IL1RAP, STAT6, HLA-DPB1, NFKBIE, IL6R, IL2RB	PPP3CB, JAK1, RUNX1, RARA, TGFBR2
S1 vs S2B	KEGG	Up	hsa04015	Rap1 signaling pathway	159	24	15	0.000707659	0.369481	0.0360112	1	KITLG, RAC3, ID1, PLCG1, PFN2, MAPK12, IGF1, PARD6G, EFNA4, LPAR3, RALB, PRKD2, ANGPT2, SIPA1L1, EPHA2, RGS14, TIAM1, DOCK4, VAV2, PLCB4, PLCB2, CSF1, EFNA3, NGF	CALM1, RAPGEF1, FGF5, MRAS, RASGRP2, LPAR4, MAP2K1, PLCE1, NGFR, VEGFC, FGFR4, VAV3, FGF7, THBS1, FGF9
S1 vs S2B	KEGG	Up	hsa05205	Proteoglycans in cancer	174	25	24	0.000707928	0.00741008	0.0360112	0.165986	MMP2, WNT2B, FLNA, PTCH1, PLCG1, MAPK12, TGFB1, FAS, IGF1, WNT16, FZD3, SDC1, SLC9A1, TIAM1, MYC, GPC3, FZD10, PPP1R12C, VAV2, TIMP3, TWIST1, TGFB2, HBEGF, MDM2, ITPR2	ERBB3, ANK1, CAV3, GPC1, HSPB2, ERBB2, MRAS, WNT9A, NUDT16L1, FLNC, FZD9, MAP2K1, PDPK1, WNT2, PLCE1, CAMK2D, PRKACA, IGF2.1, HSPG2, CAMK2B, CASP3, FZD1, VAV3, THBS1
S1 vs S2B	KEGG	Up	hsa05200	Pathways in cancer	404	48	47	0.000750233	0.0132688	0.0360112	0.262254	KITLG, RAC3, LEF1, MMP2, LAMA1, GLI3, GLI2, WNT2B, ETS1, PTCH1, PLCG1, AXIN2, NFKBIA, JAG1, TGFB1, PLD2, FAS, FOS, JUN, IGF1, LPAR3, WNT16, DDB2, RALB, FZD3, COL4A1, TRAF3, NQO1, BBC3, STAT5B	EGLN3, NCOA1, CCND3, CALM1, GADD45G, DLL1, RPS6KA5, ERBB2, BCL2L11, FGF5, RB1, WNT9A, ITGA6, JAK1, TRAF5, RUNX1, LRP5, RASGRP2, RARA, FZD9, CASP9, LPAR4, MAP2K1, WNT2, CAMK2D, TXNRD2, VEGFC, PRKACA, TGFBR2, CDK6
S1 vs S2B	KEGG	Up	hsa05217	Basal cell carcinoma	48	11	5	0.00100347	0.424716	0.0421456	1	LEF1, GLI3, GLI2, WNT2B, PTCH1, AXIN2, WNT16, DDB2, FZD3, AXIN1, FZD10	GADD45G, WNT9A, FZD9, WNT2, FZD1
S1 vs S2B	KEGG	Up	hsa04514	Cell adhesion molecules	86	15	10	0.00136938	0.174567	0.0474605	0.837921	NECTIN1, HLA-E, CNTNAP1, VCAN, ICAM3, SDC1, CDH2, CLDN6, LRRC4C, NLGN2, PTPRF, HLA-DPB1, ITGA9, CLDN7, CDH3	JAM3, CLDN5, NCAM1, ITGA4, CDH15, ITGA6, JAM2, NECTIN3, ICOSLG, VSIR
S1 vs S2B	KEGG	Up	hsa04658	Th1 and Th2 cell differentiation	57	12	6	0.00143017	0.402928	0.0474605	1	PLCG1, MAPK12, NFKBIA, JAG1, FOS, JUN, STAT5B, STAT6, HLA-DPB1, NFKBIE, NOTCH3, IL2RB	RBPJ, DLL1, PPP3CB, JAK1, JAG2, MAF
S1 vs S2B	KEGG	Up	hsa04115	p53 signaling pathway	70	13	12	0.00155377	0.0116717	0.0474605	0.245106	FAS, PIDD1, IGF1, PPM1D, DDB2, SESN2, TNFRSF10B, TNFRSF10A, BBC3, CDK2, MDM2, BCL2, CHEK2	CCND3, GADD45G, CCNG2, RPRM, CASP9, RCHY1, CDK6, CASP3, ADGRB1, THBS1, AIFM2, IGFBP3
S1 vs S2B	KEGG	Up	hsa04933	AGE-RAGE signaling pathway in diabetic complications	88	15	6	0.00200251	0.76381	0.0560702	1	MMP2, PLCG1, MAPK12, TGFB1, JUN, COL4A1, PRKCE, STAT5B, CCL2, PLCB4, TGFB2, COL4A2, PLCB2, COL4A6, BCL2	PLCE1, VEGFC, TGFBR2, FOXO1, CASP3, TGFB3
S1 vs S2B	KEGG	Up	hsa05146	Amoebiasis	64	12	7	0.00225898	0.28511	0.0579417	0.979208	LAMA1, ACTN1, TGFB1, ARG2, GNAL, COL4A1, IL1R1, PLCB4, TGFB2, COL4A2, PLCB2, COL4A6	SERPINB6, HSPB1, PRKACA, LAMA5, RAB5B, CASP3, TGFB3
S1 vs S2B	KEGG	Up	hsa04360	Axon guidance	153	22	17	0.00241424	0.154653	0.0579417	0.792562	RAC3, SLIT2, EFNB3, PTCH1, EFNB1, BOC, PLCG1, PARD6G, EFNA4, EFNB2, ROBO1, FZD3, EPHA2, BMP7, RGS3, SRGAP3, LRRC4C, EPHB4, MYL9, ROBO2, EFNA3, NRP1	CFL2, SEMA3E, ABLIM3, SEMA6A, PLXNA1, SEMA6B, PPP3CB, MYL5, SEMA6C, FYN, CAMK2D, SSH3, CAMK2B, DPYSL5, RASA1, EPHA7, PDK1
S1 vs S2B	KEGG	Up	hsa04010	MAPK signaling pathway	231	30	39	0.00310903	3.29586e-05	0.0696422	0.00184568	KITLG, MKNK2, RAC3, FLNA, MAPK12, TGFB1, FAS, FOS, MAP3K11, JUN, IGF1, EFNA4, ANGPT2, RPS6KA1, EPHA2, ECSIT, IL1R1, CACNA1C, MYC, ARRB2, CACNB3, TGFB2, MAP4K2, IL1RAP, DUSP5, DUSP9, RELB, CSF1, EFNA3, NGF	ERBB3, CACNA2D1, MEF2C, GADD45G, CACNB1, RPS6KA5, MAP3K5, CACNA1S, MAP3K7, ERBB2, PPP3CB, STK3, FGF5, MRAS, HSPB1, CACNG6, FLNC, RASGRP2, MAPK8IP1, MAP2K1, NGFR, CDC25B, VEGFC, STMN1, PRKACA, TGFBR2, DDIT3, DUSP4, IGF2.1, FGFR4
S1 vs S2B	KEGG	Up	hsa04512	ECM-receptor interaction	64	11	14	0.00647255	0.000603013	0.129964	0.0202612	SV2A, LAMA1, ITGA1, TNC, AGRN, SDC1, COL4A1, COL6A3, COL4A2, ITGA9, COL4A6	NPNT, DAG1, CD36, ITGA4, ITGA7, ITGB6, ITGA6, LAMA5, HSPG2, THBS2, TNXB, THBS1, CD47, ITGA10
S1 vs S2B	KEGG	Up	hsa05210	Colorectal cancer	83	13	7	0.00730801	0.542895	0.129964	1	RAC3, LEF1, AXIN2, TGFB1, FOS, JUN, DDB2, RALB, BBC3, MYC, AXIN1, TGFB2, BCL2	GADD45G, BCL2L11, CASP9, MAP2K1, TGFBR2, CASP3, TGFB3
S1 vs S2B	KEGG	Up	hsa04024	cAMP signaling pathway	131	18	17	0.00732365	0.0427764	0.129964	0.479096	RAC3, GLI3, PTCH1, NFKBIA, PLD2, FOS, JUN, PDE4A, SLC9A1, CACNA1C, TIAM1, EDNRA, VAV2, ATP2B4, ABCC4, GABBR1, MYL9, SOX9	CALM1, CACNA1S, ATP2A1, ATP2A2, NPY, ATP1A1, TNNI3, MAP2K1, PLCE1, CAMK2D, ATP2B1, FXYD1, PRKACA, CAMK2B, ADRB2, VAV3, PPARA
S1 vs S2B	KEGG	Up	hsa04742	Taste transduction	23	6	2	0.00751379	0.620837	0.129964	1	PDE1C, CACNA1C, PLCB4, GABBR1, PLCB2, GABRA5	PRKACA, GNB3
S1 vs S2B	KEGG	Up	hsa04270	Vascular smooth muscle contraction	83	13	7	0.00773594	0.550543	0.129964	1	MRVI1, MYH9, NPPB, CACNA1C, PRKCE, EDNRA, PPP1R12C, PLCB4, ADM, PLCB2, MYL9, ADRA1D, ITPR2	CALM1, CACNA1S, PRKG1, MYL6B, RAMP1, MAP2K1, PRKACA
S1 vs S2B	KEGG	Down	hsa05414	Dilated cardiomyopathy	69	9	30	0.0575351	1.04113e-15	0.291872	1.81898e-13	LAMA1, ITGA1, TPM4, TGFB1, IGF1, CACNA1C, CACNB3, TGFB2, ITGA9	CACNA2D1, MYH7, TNNC1, CACNB1, DAG1, SGCA, SGCB, CACNA1S, ATP2A1, DES, TTN, ATP2A2, ITGA4, TNNT2, ITGA7, ITGB6, ITGA6, MYL3, LMNA, CACNG6, TNNI3, ACTC1, PRKACA, DMD, TPM2, SGCD, SGCG, TPM1, TGFB3, ITGA10
S1 vs S2B	KEGG	Down	hsa05410	Hypertrophic cardiomyopathy	69	9	30	0.0579696	1.08272e-15	0.291872	1.81898e-13	LAMA1, ITGA1, TPM4, TGFB1, IGF1, CACNA1C, CACNB3, TGFB2, ITGA9	CACNA2D1, MYH7, TNNC1, CACNB1, DAG1, SGCA, SGCB, CACNA1S, ATP2A1, DES, TTN, ATP2A2, ITGA4, TNNT2, ITGA7, ITGB6, ITGA6, MYL3, LMNA, CACNG6, TNNI3, ACTC1, DMD, TPM2, SGCD, SGCG, PRKAB2, TPM1, TGFB3, ITGA10
S1 vs S2B	KEGG	Down	hsa05412	Arrhythmogenic right ventricular cardiomyopathy	60	9	21	0.0298018	4.5403e-09	0.263511	5.08513e-07	LEF1, LAMA1, ITGA1, CDH2, CACNA1C, DSP, CACNB3, GJA1, ITGA9	ACTN2, CACNA2D1, CACNB1, DAG1, SGCA, SGCB, CACNA1S, ATP2A1, DES, ATP2A2, ITGA4, ITGA7, ITGB6, ITGA6, LMNA, CACNG6, DMD, PKP2, SGCD, SGCG, ITGA10
S1 vs S2B	KEGG	Down	hsa04260	Cardiac muscle contraction	62	4	20	0.603012	1.06545e-08	0.999142	8.94977e-07	TPM4, SLC9A1, CACNA1C, CACNB3	CASQ2, CACNA2D1, MYH7, TNNC1, CACNB1, HRC, CACNA1S, ATP2A1, MYL4, ATP2A2, COX6A2, TNNT2, ATP1A1, MYL3, CACNG6, TNNI3, ACTC1, TPM2, TPM1, SLC9A7
S1 vs S2B	KEGG	Down	hsa04261	Adrenergic signaling in cardiomyocytes	102	10	24	0.205232	1.46063e-06	0.621243	9.81544e-05	TPM4, MAPK12, SLC9A1, CACNA1C, ATP2B4, PLCB4, CACNB3, PLCB2, ADRA1D, BCL2	CACNA2D1, MYH7, CALM1, TNNC1, CACNB1, RPS6KA5, CACNA1S, ATP2A1, MYL4, PPP2R3B, ATP2A2, TNNT2, ATP1A1, MYL3, CACNG6, TNNI3, CAMK2D, ACTC1, ATP2B1, PRKACA, CAMK2B, TPM2, ADRB2, TPM1
S1 vs S2B	KEGG	Down	hsa04010	MAPK signaling pathway	231	30	39	0.00310903	3.29586e-05	0.0696422	0.00184568	KITLG, MKNK2, RAC3, FLNA, MAPK12, TGFB1, FAS, FOS, MAP3K11, JUN, IGF1, EFNA4, ANGPT2, RPS6KA1, EPHA2, ECSIT, IL1R1, CACNA1C, MYC, ARRB2, CACNB3, TGFB2, MAP4K2, IL1RAP, DUSP5, DUSP9, RELB, CSF1, EFNA3, NGF	ERBB3, CACNA2D1, MEF2C, GADD45G, CACNB1, RPS6KA5, MAP3K5, CACNA1S, MAP3K7, ERBB2, PPP3CB, STK3, FGF5, MRAS, HSPB1, CACNG6, FLNC, RASGRP2, MAPK8IP1, MAP2K1, NGFR, CDC25B, VEGFC, STMN1, PRKACA, TGFBR2, DDIT3, DUSP4, IGF2.1, FGFR4
S1 vs S2B	KEGG	Down	hsa05416	Viral myocarditis	40	4	11	0.315293	0.000206259	0.778959	0.00990045	RAC3, LAMA1, HLA-E, HLA-DPB1	MYH7, DAG1, SGCA, SGCB, CASP9, FYN, DMD, SGCD, CASP3, SGCG, ABL2
S1 vs S2B	KEGG	Down	hsa04020	Calcium signaling pathway	120	16	22	0.0184575	0.000433403	0.206724	0.0174793	ITPKA, PLCG1, PDE1C, ORAI2, GNAL, SPHK1, CACNA1C, ITPKB, EDNRA, PPIF, CAMK1, ATP2B4, PLCB4, PLCB2, ADRA1D, ITPR2	CASQ2, ERBB3, RYR1, TNNC2, CALM1, TNNC1, HRC, CACNA1S, ATP2A1, MCU, ERBB2, ATP2A2, PPP3CB, P2RX6, PLCE1, CAMK2D, ATP2B1, PRKACA, CACNA1H, CAMK2B, ADRB2, P2RX5
S1 vs S2B	KEGG	Down	hsa04740	Olfactory transduction	23	3	8	0.260822	0.000468195	0.713318	0.0174793	PDE1C, GNAL, ARRB2	GRK3, CALM1, PRKG1, RGS2, CAMK2D, PRKACA, CAMK2B, NCALD
S1 vs S2B	KEGG	Down	hsa04512	ECM-receptor interaction	64	11	14	0.00647255	0.000603013	0.129964	0.0202612	SV2A, LAMA1, ITGA1, TNC, AGRN, SDC1, COL4A1, COL6A3, COL4A2, ITGA9, COL4A6	NPNT, DAG1, CD36, ITGA4, ITGA7, ITGB6, ITGA6, LAMA5, HSPG2, THBS2, TNXB, THBS1, CD47, ITGA10
S1 vs S2B	KEGG	Down	hsa04068	FoxO signaling pathway	111	7	19	0.759319	0.00273708	1	0.0836054	MAPK12, TGFB1, IGF1, PLK2, TGFB2, CDK2, MDM2	GADD45G, SETD7, BCL2L11, FBXO32, CCNG2, GABARAPL1, GABARAPL2, KLF2, MAP2K1, PDPK1, BCL6, TGFBR2, FOXO1, FBXO25, FOXO6, RAG1, PRKAB2, TGFB3, FOXO4
S1 vs S2B	KEGG	Down	hsa04921	Oxytocin signaling pathway	105	10	17	0.254781	0.00599072	0.713318	0.165986	FOS, JUN, CACNA1C, PPP1R12C, CAMK1, PLCB4, CACNB3, PLCB2, MYL9, ITPR2	RYR1, CACNA2D1, MEF2C, CALM1, CACNB1, CACNA1S, MYL6B, KCNJ6, PPP3CB, RGS2, CACNG6, MAP2K1, CAMK2D, PRKACA, CAMK2B, PRKAB2, KCNJ2
S1 vs S2B	KEGG	Down	hsa04970	Salivary secretion	42	6	9	0.0912015	0.00726109	0.414104	0.165986	SLC9A1, ATP2B4, PLCB4, PLCB2, ADRA1D, ITPR2	CALM1, PRKG1, ATP1A1, VAMP2, ATP2B1, SLC4A2, PRKACA, SLC12A2, ADRB2
S1 vs S2B	KEGG	Down	hsa00330	Arginine and proline metabolism	36	4	8	0.263712	0.00735985	0.713318	0.165986	ARG2, ALDH2, OAT, SAT1	GATM, CKM, P4HA2, AZIN2, P4HA3, CKMT2, GAMT, CKB
S1 vs S2B	KEGG	Down	hsa05205	Proteoglycans in cancer	174	25	24	0.000707928	0.00741008	0.0360112	0.165986	MMP2, WNT2B, FLNA, PTCH1, PLCG1, MAPK12, TGFB1, FAS, IGF1, WNT16, FZD3, SDC1, SLC9A1, TIAM1, MYC, GPC3, FZD10, PPP1R12C, VAV2, TIMP3, TWIST1, TGFB2, HBEGF, MDM2, ITPR2	ERBB3, ANK1, CAV3, GPC1, HSPB2, ERBB2, MRAS, WNT9A, NUDT16L1, FLNC, FZD9, MAP2K1, PDPK1, WNT2, PLCE1, CAMK2D, PRKACA, IGF2.1, HSPG2, CAMK2B, CASP3, FZD1, VAV3, THBS1
S1 vs S2B	KEGG	Down	hsa04115	p53 signaling pathway	70	13	12	0.00155377	0.0116717	0.0474605	0.245106	FAS, PIDD1, IGF1, PPM1D, DDB2, SESN2, TNFRSF10B, TNFRSF10A, BBC3, CDK2, MDM2, BCL2, CHEK2	CCND3, GADD45G, CCNG2, RPRM, CASP9, RCHY1, CDK6, CASP3, ADGRB1, THBS1, AIFM2, IGFBP3
S1 vs S2B	KEGG	Down	hsa05200	Pathways in cancer	404	48	47	0.000750233	0.0132688	0.0360112	0.262254	KITLG, RAC3, LEF1, MMP2, LAMA1, GLI3, GLI2, WNT2B, ETS1, PTCH1, PLCG1, AXIN2, NFKBIA, JAG1, TGFB1, PLD2, FAS, FOS, JUN, IGF1, LPAR3, WNT16, DDB2, RALB, FZD3, COL4A1, TRAF3, NQO1, BBC3, STAT5B	EGLN3, NCOA1, CCND3, CALM1, GADD45G, DLL1, RPS6KA5, ERBB2, BCL2L11, FGF5, RB1, WNT9A, ITGA6, JAK1, TRAF5, RUNX1, LRP5, RASGRP2, RARA, FZD9, CASP9, LPAR4, MAP2K1, WNT2, CAMK2D, TXNRD2, VEGFC, PRKACA, TGFBR2, CDK6
S1 vs S2B	KEGG	Down	hsa04510	Focal adhesion	172	19	22	0.0351547	0.0181034	0.267345	0.337929	RAC3, LAMA1, ACTN1, ITGA1, FLNA, ZYX, TNC, JUN, IGF1, COL4A1, COL6A3, PPP1R12C, VAV2, COL4A2, MYL9, ITGA9, SHC3, COL4A6, BCL2	CCND3, MYLPF, CAV3, RAPGEF1, ERBB2, ITGA4, MYL5, ITGA7, ITGB6, ITGA6, FLNC, FYN, MAP2K1, PDPK1, VEGFC, LAMA5, RASGRF1, VAV3, THBS2, TNXB, THBS1, ITGA10
S1 vs S2B	KEGG	Down	hsa04713	Circadian entrainment	58	4	10	0.642276	0.0217851	1	0.354298	FOS, CACNA1C, PLCB4, PLCB2	RYR1, CALM1, RPS6KA5, PRKG1, KCNJ6, CAMK2D, PRKACA, CACNA1H, CAMK2B, GNB3
S1 vs S2B	KEGG	Down	hsa00500	Starch and sucrose metabolism	20	0	5	1	0.0218543	1	0.354298		UGP2, PGM1, GYS1, PYGM, GYG2

## Sheet: S1 vs bMyo
Supplementary file 2. Top 20 Up and Down GO terms (BP, CC, MF) and KEGG pathways for pairwise cell type comparisons. Terms comprising N (< 500) genes are sorted by P.Up and P.Down. For each term, the top Genes.Up and Genes.Down are listed.
Comparison	Ont	Dir	GO/KEGG ID	GO Term / KEGG Pathway (top 20 Up and Down)	N	Up	Down	P.Up	P.Down	FDR.Up	FDR.Down	Genes.Up (limited to a maximum of the top 30 Up genes)	Genes.Down (limited to a maximum of the top 30 Down genes)
S1 vs bMyo	BP	Up	GO:1902653	secondary alcohol biosynthetic process	60	25	5	2.72e-11	0.729855	5.52568e-07	1	SQLE, DHCR24, FDFT1, APOE, HMGCS1, MSMO1, FASN, TM7SF2, DHCR7, ACACA, SCD, MVD, ACAT2, ERG28, IDI1, HMGCR, LSS, SREBF2, FDPS, CYP51A1, NSDHL, PRKAA2, HSD17B7, ELOVL6, MVK	G6PD, SEC14L2, ERLIN1, APOA1, INSIG2
S1 vs bMyo	BP	Up	GO:0006695	cholesterol biosynthetic process	59	24	5	1.44531e-10	0.717187	1.2129e-06	1	SQLE, DHCR24, FDFT1, APOE, HMGCS1, MSMO1, FASN, TM7SF2, DHCR7, ACACA, SCD, MVD, ACAT2, IDI1, HMGCR, LSS, SREBF2, FDPS, CYP51A1, NSDHL, PRKAA2, HSD17B7, ELOVL6, MVK	G6PD, SEC14L2, ERLIN1, APOA1, INSIG2
S1 vs bMyo	BP	Up	GO:0098742	cell-cell adhesion via plasma-membrane adhesion molecules	149	44	19	1.79113e-10	0.346077	1.2129e-06	1	SDK2, CXADR, DSG2, TGFB2, PTPRD, CLDN6, ANXA3, PCDHA10, DCHS1, PCDH7, ICAM1, IGSF9, DSC2, ARVCF, TENM2, ROBO2, CLDN10, LRRC4C, CLSTN2, PCDHA12, TRO, ADGRL3, MBP, CRB2, CELSR3, PCDHA4, HMCN1, ROBO1, ADGRL1, CDH18	KIRREL3, TGFBR2, NPTN, NTNG1, AMIGO2, MYPN, ACVR1, NECTIN4, FGFRL1, CDH15, ROBO3, ROBO4, ITGA5, EMB, FXYD5, APOA1, NTNG2, CDH13, CLDN4
S1 vs bMyo	BP	Up	GO:0016126	sterol biosynthetic process	65	25	5	2.93261e-10	0.798291	1.4894e-06	1	SQLE, DHCR24, FDFT1, APOE, HMGCS1, MSMO1, FASN, TM7SF2, DHCR7, ACACA, SCD, MVD, ACAT2, ERG28, IDI1, HMGCR, LSS, SREBF2, FDPS, CYP51A1, NSDHL, PRKAA2, HSD17B7, ELOVL6, MVK	G6PD, SEC14L2, ERLIN1, APOA1, INSIG2
S1 vs bMyo	BP	Up	GO:0006935	chemotaxis	408	81	72	1.45769e-09	2.31468e-05	5.9226e-06	0.00270246	SLIT2, TUBB2B, LAMA1, AKIRIN1, CYFIP2, AGRN, LEF1, MYH10, CXADR, B3GNT2, TGFB2, BCAR1, HOXB9, CRMP1, SEMA3A, PDGFD, NOTCH1, EFNB1, SEMA6B, GATA3, AMOT, ITGA1, DPYSL5, CMTM3, LYN, PTCH1, FLT1, IGSF9, FZD3, RNF165	HSD3B7, PLP2, MET, VEGFC, PGF, SEMA7A, VEGFA, TGFB1, LRP1, BMPR2, FAM129B, NFASC, NFIB, CSF1, FGF7, VEGFB, CCL26, NPTN, SEMA3C, PLAUR, NTNG1, RALA, ITGB3, MAPK3, FOXD1, FPR1, SEMA4B, PTPRJ, STX4, NRP1
S1 vs bMyo	BP	Up	GO:0042330	taxis	410	81	73	1.77639e-09	1.42429e-05	6.01455e-06	0.00187885	SLIT2, TUBB2B, LAMA1, AKIRIN1, CYFIP2, AGRN, LEF1, MYH10, CXADR, B3GNT2, TGFB2, BCAR1, HOXB9, CRMP1, SEMA3A, PDGFD, NOTCH1, EFNB1, SEMA6B, GATA3, AMOT, ITGA1, DPYSL5, CMTM3, LYN, PTCH1, FLT1, IGSF9, FZD3, RNF165	HSD3B7, PLP2, MET, VEGFC, PGF, SEMA7A, VEGFA, TGFB1, LRP1, BMPR2, FAM129B, NFASC, NFIB, CSF1, FGF7, VEGFB, CCL26, NPTN, SEMA3C, PLAUR, NTNG1, RALA, ITGB3, MAPK3, FOXD1, FPR1, SEMA4B, PTPRJ, STX4, NRP1
S1 vs bMyo	BP	Up	GO:0048812	neuron projection morphogenesis	494	92	59	2.12176e-09	0.225417	6.15764e-06	0.977314	SLIT2, APOE, TUBB2B, LAMA1, CYFIP2, AGRN, MYH10, B3GNT2, HSP90AB1, PPP1R9A, DICER1, STK26, COL25A1, PTPRD, CRMP1, SEMA3A, ADGRB3, METRN, SS18L2, RTN4R, NOTCH1, SLITRK5, EFNB1, SEMA6B, GATA3, ITGA1, DPYSL5, PTCH1, SRF, NEFL	SKIL, SEMA7A, VEGFA, LRP1, BMPR2, FAM129B, NFASC, NGEF, NFIB, DBNL, KIRREL3, RTN4, FN1, NPTN, SEMA3C, NTNG1, FLOT1, SIPA1L1, WNT7B, MAP4K4, MAPK3, S100A6, FOXD1, SEMA4B, PAK1, TNFRSF12A, ID1, NRP1, NTRK3, PPP3CA
S1 vs bMyo	BP	Up	GO:0045540	regulation of cholesterol biosynthetic process	40	18	2	4.07239e-09	0.919695	9.19229e-06	1	SQLE, FDFT1, APOE, HMGCS1, FASN, TM7SF2, DHCR7, ACACA, SCD, MVD, IDI1, HMGCR, LSS, SREBF2, FDPS, CYP51A1, ELOVL6, MVK	SEC14L2, ERLIN1
S1 vs bMyo	BP	Up	GO:0106118	regulation of sterol biosynthetic process	40	18	2	4.07239e-09	0.919695	9.19229e-06	1	SQLE, FDFT1, APOE, HMGCS1, FASN, TM7SF2, DHCR7, ACACA, SCD, MVD, IDI1, HMGCR, LSS, SREBF2, FDPS, CYP51A1, ELOVL6, MVK	SEC14L2, ERLIN1
S1 vs bMyo	BP	Up	GO:0061564	axon development	388	76	53	5.16486e-09	0.0422894	1.04924e-05	0.454796	SLIT2, APOE, TUBB2B, LAMA1, CYFIP2, AGRN, MYH10, B3GNT2, HSP90AB1, COL25A1, CRMP1, SEMA3A, METRN, RTN4R, NOTCH1, SLITRK5, EFNB1, SEMA6B, GATA3, DPYSL5, PTCH1, SRF, NEFL, IGSF9, FZD3, RNF165, TNFRSF21, SEMA6A, LYPLA2, LINGO1	SKIL, SEMA7A, VEGFA, LRP1, BMPR2, FAM129B, NFASC, NFIB, DBNL, RTN4, FN1, NPTN, SEMA3C, NTNG1, FLOT1, SIPA1L1, MAPK3, S100A6, FOXD1, SEMA4B, PAK1, TNFRSF12A, NRP1, NTRK3, PLXNA4, TSPO, MYPN, RANBP9, ABL1, DVL1
S1 vs bMyo	BP	Up	GO:1902652	secondary alcohol metabolic process	119	34	13	6.6787e-09	0.489047	1.23343e-05	1	SQLE, DHCR24, FDFT1, APOE, HMGCS1, MSMO1, FASN, TM7SF2, DHCR7, ACACA, SCARB1, APOC1, SCD, LDLR, MVD, IDH1, ACAT2, ERG28, IDI1, HMGCR, LSS, SREBF2, OSBPL1A, FDPS, SCARF1, CYP51A1, NSDHL, SORL1, PRKAA2, HSD17B7	ACADVL, HSD3B7, SMPD1, G6PD, SEC14L2, PPARD, ERLIN1, APOA1, INSIG2, CAT, TTC39B, APOL2, CYP46A1
S1 vs bMyo	BP	Up	GO:0016125	sterol metabolic process	121	34	15	1.35387e-08	0.304385	2.09176e-05	1	SQLE, DHCR24, FDFT1, APOE, HMGCS1, MSMO1, FASN, TM7SF2, DHCR7, ACACA, SCARB1, APOC1, SCD, LDLR, MVD, ACAT2, ERG28, IDI1, HMGCR, LSS, SREBF2, OSBPL1A, FDPS, SCARF1, CYP51A1, NSDHL, SORL1, CYP1B1, PRKAA2, HSD17B7	ACADVL, HSD3B7, SMPD1, G6PD, SEC14L2, PPARD, CYP26B1, ERLIN1, CYP4V2, APOA1, INSIG2, CAT, TTC39B, APOL2, CYP46A1
S1 vs bMyo	BP	Up	GO:0008203	cholesterol metabolic process	110	32	13	1.36164e-08	0.384308	2.09176e-05	1	SQLE, DHCR24, FDFT1, APOE, HMGCS1, MSMO1, FASN, TM7SF2, DHCR7, ACACA, SCARB1, APOC1, SCD, LDLR, MVD, ACAT2, IDI1, HMGCR, LSS, SREBF2, OSBPL1A, FDPS, SCARF1, CYP51A1, NSDHL, SORL1, PRKAA2, HSD17B7, CEL, ELOVL6	ACADVL, HSD3B7, SMPD1, G6PD, SEC14L2, PPARD, ERLIN1, APOA1, INSIG2, CAT, TTC39B, APOL2, CYP46A1
S1 vs bMyo	BP	Up	GO:0097485	neuron projection guidance	202	48	33	1.44153e-08	0.0134079	2.09176e-05	0.22308	SLIT2, TUBB2B, LAMA1, CYFIP2, AGRN, MYH10, B3GNT2, CRMP1, SEMA3A, EFNB1, SEMA6B, GATA3, DPYSL5, PTCH1, IGSF9, FZD3, RNF165, SEMA6A, LYPLA2, GAP43, VANGL2, ROBO2, CDK5R1, GLI2, EFNB2, DPYSL4, SEMA3E, SEMA3D, SHC3, PIK3R1	SEMA7A, VEGFA, LRP1, BMPR2, FAM129B, NFASC, NFIB, NPTN, SEMA3C, NTNG1, MAPK3, FOXD1, SEMA4B, NRP1, PLXNA4, MYPN, RANBP9, DVL1, CXCL12, NCAM1, CSF1R, ROBO3, ROBO4, ETV1, EMB, HOXA2, DRAXIN, WNT5A, LAMB2, NTNG2
S1 vs bMyo	BP	Up	GO:1902930	regulation of alcohol biosynthetic process	56	21	6	2.696e-08	0.542707	3.65129e-05	1	SQLE, FDFT1, APOE, HMGCS1, FASN, TM7SF2, DHCR7, ACACA, SCD, MVD, IDI1, HMGCR, LSS, SREBF2, FDPS, SNCA, CYP51A1, BMP5, P2RY1, ELOVL6, MVK	SEC14L2, ERLIN1, DKK3, HRH1, GPER1, P2RY6
S1 vs bMyo	BP	Up	GO:0007411	axon guidance	201	47	33	3.34197e-08	0.0124166	4.24326e-05	0.212742	SLIT2, TUBB2B, LAMA1, CYFIP2, AGRN, MYH10, B3GNT2, CRMP1, SEMA3A, EFNB1, SEMA6B, GATA3, DPYSL5, PTCH1, IGSF9, FZD3, RNF165, SEMA6A, LYPLA2, GAP43, VANGL2, ROBO2, CDK5R1, GLI2, EFNB2, SEMA3E, SEMA3D, SHC3, PIK3R1, KIF5C	SEMA7A, VEGFA, LRP1, BMPR2, FAM129B, NFASC, NFIB, NPTN, SEMA3C, NTNG1, MAPK3, FOXD1, SEMA4B, NRP1, PLXNA4, MYPN, RANBP9, DVL1, CXCL12, NCAM1, CSF1R, ROBO3, ROBO4, ETV1, EMB, HOXA2, DRAXIN, WNT5A, LAMB2, NTNG2
S1 vs bMyo	BP	Up	GO:0007409	axonogenesis	355	69	50	3.70321e-08	0.0305643	4.42533e-05	0.37643	SLIT2, APOE, TUBB2B, LAMA1, CYFIP2, AGRN, MYH10, B3GNT2, HSP90AB1, COL25A1, CRMP1, SEMA3A, METRN, RTN4R, NOTCH1, SLITRK5, EFNB1, SEMA6B, GATA3, DPYSL5, PTCH1, SRF, NEFL, IGSF9, FZD3, RNF165, SEMA6A, LYPLA2, LINGO1, ANK3	SKIL, SEMA7A, VEGFA, LRP1, BMPR2, FAM129B, NFASC, NFIB, DBNL, RTN4, FN1, NPTN, SEMA3C, NTNG1, FLOT1, SIPA1L1, MAPK3, S100A6, FOXD1, SEMA4B, PAK1, TNFRSF12A, NRP1, NTRK3, PLXNA4, MYPN, RANBP9, ABL1, DVL1, CXCL12
S1 vs bMyo	BP	Up	GO:0010721	negative regulation of cell development	239	51	46	6.46475e-08	4.62048e-05	6.70104e-05	0.00466878	PRTG, SLIT2, APOE, LIN28A, ITM2C, LDLR, DICER1, GDF11, CRMP1, SEMA3A, RTN4R, NOTCH1, SEMA6B, IGF1, ASAP1, HES4, GAL, SEMA6A, LINGO1, FBLN1, CDK5R1, SYNGAP1, SORL1, EFNB2, FKBP4, SEMA3E, SEMA3D, INPP5F, SRGAP2, LRP4	NR1D1, SEMA7A, VEGFA, TGFB1, VIM, LRP1, LGALS1, CTSZ, NGEF, SPOCK1, ADGRG1, B2M, G6PD, RTN4, ACTN4, SEMA3C, APPL2, MAP4K4, MELTF, ARHGEF2, SEMA4B, PAK1, CTDSP1, ID1, NRP1, CIB1, NTRK3, PPP3CA, ID2, TSPO
S1 vs bMyo	BP	Up	GO:0090181	regulation of cholesterol metabolic process	50	19	4	7.48185e-08	0.773169	7.2378e-05	1	SQLE, FDFT1, APOE, HMGCS1, FASN, TM7SF2, DHCR7, ACACA, SCD, LDLR, MVD, IDI1, HMGCR, LSS, SREBF2, FDPS, CYP51A1, ELOVL6, MVK	ACADVL, SEC14L2, ERLIN1, TTC39B
S1 vs bMyo	BP	Up	GO:0048667	cell morphogenesis involved in neuron differentiation	455	81	56	1.37869e-07	0.169723	0.000115351	0.874662	SLIT2, APOE, TUBB2B, LAMA1, CYFIP2, AGRN, MYH10, B3GNT2, HSP90AB1, PPP1R9A, COL25A1, PTPRD, CRMP1, SEMA3A, ADGRB3, METRN, SS18L2, RTN4R, NOTCH1, SLITRK5, EFNB1, SEMA6B, GATA3, DPYSL5, PTCH1, SRF, NEFL, IGSF9, FZD3, RNF165	SKIL, SEMA7A, VEGFA, LRP1, BMPR2, FAM129B, NFASC, NGEF, NFIB, DBNL, RTN4, FN1, NPTN, SEMA3C, NTNG1, FLOT1, SIPA1L1, MAPK3, S100A6, FOXD1, SEMA4B, PAK1, TRIOBP, TNFRSF12A, ID1, NRP1, CABP4, NTRK3, PPP3CA, ID2
[truncated: 140 more rows]

## Sheet: S1 vs bMes
Supplementary file 2. Top 20 Up and Down GO terms (BP, CC, MF) and KEGG pathways for pairwise cell type comparisons. Terms comprising N (< 500) genes are sorted by P.Up and P.Down. For each term, the top Genes.Up and Genes.Down are listed.
[truncated: 161 more rows]

[truncated: 5 more sheets: S2A vs S2B, S2A vs bMyo, S2A vs bMes, S2B vs bMyo, S2B vs bMes]
