# Supplementary material for: iMyoblasts for ex vivo and in vivo investigations of human myogenesis and disease modeling
Source: eLife. 2022 Jan 25;11:e70341. doi: 10.7554/eLife.70341 (PMC8789283; doi:10.7554/eLife.70341)
Supplement: Supplementary file 3. — Raw single-cell counts were summed for each of the 6 cell types or subclusters of interest (S1, S2A, S2B, iMyoblast, bMyo, bMes) in each of the six donors (15 A, 15 V, 17 A, 17 U, 30 A, 30 W). [file elife-70341-supp3.xlsx]

## Sheet: Pseudobulk Counts
Supplementary file 3. Pseudobulk counts for 36 samples based on scRNA-seq data.
Gene Symbol	Ensembl ID	S1_15A	S1_15V	S1_17A	S1_17U	S1_30A	S1_30W	S2A_15A	S2A_15V	S2A_17A	S2A_17U	S2A_30A	S2A_30W	S2B_15A	S2B_15V	S2B_17A	S2B_17U	S2B_30A	S2B_30W	iMyoblast_15A	iMyoblast_15V	iMyoblast_17A	iMyoblast_17U	iMyoblast_30A	iMyoblast_30W	bMyo_15A	bMyo_15V	bMyo_17A	bMyo_17U	bMyo_30A	bMyo_30W	bMes_15A	bMes_15V	bMes_17A	bMes_17U	bMes_30A	bMes_30W
A1BG	ENSG00000121410	7	5	13	7	6	10	0	2	0	0	2	3	7	10	12	9	1	1	14	12	3	13	7	7	1	11	9	2	4	4	12	0	0	1	0	2
A1BG-AS1	ENSG00000268895	28	46	71	46	34	30	0	5	9	3	10	19	34	33	56	43	22	14	57	73	29	49	64	54	20	40	52	54	40	47	83	4	12	0	2	4
A1CF	ENSG00000148584	0	0	0	0	0	0	0	0	0	0	0	0	0	0	0	1	0	0	0	0	0	0	0	0	0	0	0	0	0	0	0	0	0	0	0	0
A2M	ENSG00000175899	97	222	439	152	450	277	61	89	298	132	464	442	80	623	290	416	117	263	8	1	0	0	0	0	1	5	22	26	43	2	1	0	1	1	5	0
A2M-AS1	ENSG00000245105	4	3	10	4	2	7	0	0	2	0	4	4	3	2	12	5	6	5	0	1	2	3	3	2	4	6	18	23	2	8	4	1	0	0	0	1
A2ML1	ENSG00000166535	0	0	0	0	0	0	0	0	0	0	0	0	0	1	0	0	0	0	0	0	0	0	0	1	0	0	0	0	0	0	0	0	0	0	0	0
A2ML1-AS1	ENSG00000256661	0	0	0	0	0	1	0	0	0	0	0	0	0	0	0	0	0	0	0	0	0	0	0	0	0	0	0	1	0	0	0	0	0	0	0	0
A4GALT	ENSG00000128274	2	39	28	19	7	10	2	1	4	6	12	20	29	119	103	116	44	44	44	88	22	77	65	83	61	184	165	239	122	226	287	26	79	15	20	40
AAAS	ENSG00000094914	176	160	231	165	111	164	5	3	11	5	31	70	143	162	212	149	115	70	145	202	84	210	226	263	79	215	207	202	114	209	281	15	82	15	15	21
AACS	ENSG00000081760	203	229	300	175	149	197	7	13	12	11	46	77	157	190	214	164	97	64	99	194	65	112	147	160	37	84	78	73	65	137	138	14	33	9	10	17
AADAC	ENSG00000114771	0	0	0	0	0	0	0	0	0	0	0	0	0	0	0	0	0	0	0	3	0	0	0	0	0	0	0	0	0	0	1	0	0	0	0	0
AADACL4	ENSG00000204518	0	0	0	0	0	0	0	0	0	0	0	4	1	0	0	0	0	0	0	0	0	0	0	0	0	0	0	0	0	0	0	0	0	0	0	0
AADAT	ENSG00000109576	68	77	97	73	54	67	1	2	3	4	7	19	70	30	110	88	49	21	55	77	41	60	65	76	30	82	59	65	47	84	54	5	19	2	3	6
AAED1	ENSG00000158122	122	135	243	152	166	164	3	11	16	17	47	48	139	137	191	154	80	89	168	309	123	197	301	264	97	201	206	162	114	214	241	10	57	18	9	27
AAGAB	ENSG00000103591	151	152	265	175	159	170	0	4	14	13	41	53	186	153	250	159	114	97	132	210	82	152	198	214	62	118	131	130	88	168	204	11	46	14	5	12
AAK1	ENSG00000115977	317	379	554	416	428	405	19	36	52	41	134	153	340	377	515	389	220	197	1204	1956	773	1382	1504	1499	263	626	643	637	358	672	864	51	234	49	36	87
AAMDC	ENSG00000087884	292	308	444	237	309	266	40	40	40	47	207	223	334	426	465	402	297	201	636	1109	438	762	844	716	248	422	362	276	460	681	578	28	122	20	35	41
AAMP	ENSG00000127837	369	336	595	451	386	419	16	15	32	31	68	104	391	412	608	458	258	226	294	519	213	422	441	525	197	483	425	488	255	462	656	46	188	49	18	40
AANAT	ENSG00000129673	0	1	0	2	0	0	0	0	0	0	1	0	1	1	2	1	1	0	0	2	1	0	0	1	0	0	1	2	2	3	2	0	0	0	0	0
AAR2	ENSG00000131043	103	118	181	117	79	126	6	3	10	8	24	43	98	113	142	109	66	52	95	144	51	115	117	170	46	108	83	114	69	107	177	6	47	16	5	16
AARD	ENSG00000205002	15	22	18	13	7	18	0	0	3	0	1	0	1	1	8	1	2	1	1	1	1	2	2	1	0	8	7	13	8	8	11	1	9	0	0	1
AARS	ENSG00000090861	256	207	388	311	215	285	15	15	20	18	75	100	303	398	500	290	196	208	259	522	184	329	408	487	132	515	378	431	239	469	601	30	168	32	25	73
AARS2	ENSG00000124608	56	59	95	64	39	59	1	1	1	2	15	14	22	29	41	17	23	18	38	46	23	56	41	65	7	26	28	36	14	34	43	3	19	3	0	4
AARSD1	ENSG00000266967	76	71	125	91	85	86	5	0	5	4	16	22	87	63	110	76	43	45	47	84	35	79	70	63	24	57	68	63	34	56	70	6	17	9	4	7
AASDH	ENSG00000157426	113	83	127	71	70	115	7	5	13	5	24	38	82	91	128	99	53	55	71	114	49	104	95	100	30	102	120	114	108	117	138	8	47	6	7	10
AASDHPPT	ENSG00000149313	374	385	584	462	360	432	25	20	38	37	107	135	751	613	1009	717	434	365	346	511	213	448	476	542	167	377	363	342	214	318	443	22	120	26	5	21
AASS	ENSG00000008311	103	61	106	68	47	104	3	1	3	2	13	17	45	39	63	54	52	26	17	15	12	29	32	45	7	8	9	6	19	16	27	1	6	2	0	3
AATBC	ENSG00000215458	1	0	3	1	1	1	0	1	0	0	0	0	0	0	0	0	0	0	1	1	0	0	0	0	0	0	0	0	1	1	0	0	0	0	0	1
AATF	ENSG00000275700	353	356	530	446	342	384	15	12	18	18	56	82	238	345	396	266	192	136	353	697	319	512	556	778	190	554	556	578	300	455	616	40	223	51	18	68
AATK	ENSG00000181409	0	0	2	2	6	0	0	1	0	0	1	1	8	4	4	9	1	1	2	2	0	4	3	4	1	0	0	0	0	0	1	0	1	0	1	0
AB015752.1	ENSG00000254180	0	1	0	0	0	0	0	0	0	0	0	0	0	0	0	0	0	0	0	0	0	0	0	0	0	0	0	0	0	1	0	0	0	0	0	0
ABALON	ENSG00000281376	5	1	2	4	3	0	0	0	0	1	0	0	6	3	5	1	2	1	4	4	0	2	5	0	1	4	1	1	0	4	1	0	0	0	0	0
ABAT	ENSG00000183044	25	16	32	17	19	24	2	0	5	5	10	3	44	28	33	24	17	25	4	13	9	9	20	10	6	11	4	7	16	11	5	1	1	0	0	0
ABCA1	ENSG00000165029	27	38	67	27	62	52	10	1	6	17	12	11	1	1	3	3	9	1	25	47	16	13	10	16	5	4	2	6	9	10	12	0	0	0	0	0
ABCA10	ENSG00000154263	1	2	0	0	4	1	0	1	1	2	0	3	0	0	1	0	0	0	2	2	0	1	2	2	0	0	0	1	0	2	7	0	1	0	0	0
ABCA12	ENSG00000144452	0	0	0	1	2	1	0	0	0	0	0	0	0	0	1	0	0	1	0	2	0	1	0	0	1	0	0	0	0	0	0	0	0	0	0	0
ABCA13	ENSG00000179869	1	3	0	0	1	1	0	0	0	0	0	0	2	1	1	1	0	0	5	1	0	1	0	1	0	0	0	0	0	0	0	0	1	0	0	0
ABCA2	ENSG00000107331	10	13	14	8	4	7	0	0	2	1	4	5	2	13	16	14	1	12	41	58	20	52	60	42	17	33	22	31	19	20	64	3	11	2	3	5
ABCA3	ENSG00000167972	6	12	12	6	6	4	0	0	0	2	2	9	17	17	22	19	5	10	4	10	5	10	12	21	2	4	2	6	4	2	1	1	0	0	0	0
ABCA4	ENSG00000198691	3	1	4	1	5	1	0	1	0	1	2	1	0	7	1	5	0	4	0	1	1	1	0	1	0	1	0	0	1	1	0	0	0	0	0	0
ABCA5	ENSG00000154265	22	25	29	17	22	29	4	1	8	5	13	18	7	12	17	16	11	12	4	49	5	26	38	56	7	14	17	17	23	18	76	3	14	7	1	7
ABCA6	ENSG00000154262	0	1	0	0	0	0	0	0	1	1	0	1	0	0	0	0	0	0	0	1	0	1	0	0	0	1	0	0	0	0	23	0	1	0	1	0
ABCA7	ENSG00000064687	5	6	4	1	3	6	0	0	1	3	5	9	7	9	15	11	7	7	3	7	0	9	3	1	8	14	10	12	17	14	7	1	2	0	1	0
ABCA8	ENSG00000141338	2	1	1	1	0	0	0	0	0	0	0	0	0	0	0	2	0	0	0	1	0	0	0	0	7	7	4	12	12	15	133	0	14	1	2	2
ABCA9	ENSG00000154258	5	1	2	0	1	1	0	1	1	0	0	0	0	0	1	0	0	0	1	1	0	0	1	0	0	0	0	1	0	1	26	1	2	0	1	0
ABCA9-AS1	ENSG00000231749	0	0	0	0	0	0	0	0	0	0	1	0	0	0	0	0	0	0	0	0	0	0	0	0	0	0	0	0	0	0	0	0	0	0	0	0
ABCB1	ENSG00000085563	0	1	0	1	1	0	0	0	0	0	0	0	0	0	0	0	0	0	1	0	0	1	1	0	0	1	0	1	0	1	0	0	0	0	0	0
ABCB10	ENSG00000135776	55	61	89	84	44	67	1	4	5	2	6	19	79	89	112	86	51	47	54	117	38	82	83	92	39	92	84	104	49	99	116	10	26	9	4	9
ABCB11	ENSG00000073734	0	0	0	0	0	0	0	0	0	0	0	0	0	0	0	0	0	0	0	0	0	0	0	0	0	0	0	0	0	0	1	0	0	0	0	0
ABCB4	ENSG00000005471	6	2	4	5	1	1	0	0	0	1	3	0	3	0	0	3	1	0	0	0	0	0	0	0	0	1	0	3	2	2	0	0	0	0	0	0
ABCB5	ENSG00000004846	0	1	0	1	2	2	0	0	1	0	1	0	7	6	6	16	4	5	0	0	0	0	0	1	0	0	1	0	0	1	0	0	0	0	0	0
ABCB6	ENSG00000115657	2	2	6	1	1	5	0	0	0	0	0	0	2	1	3	1	0	0	0	1	0	0	1	3	3	2	8	4	4	5	0	0	0	1	1	0
ABCB7	ENSG00000131269	134	110	168	75	121	102	10	2	10	7	26	26	90	110	152	124	58	53	90	245	55	100	134	99	48	135	126	131	122	167	147	5	37	9	6	8
ABCB8	ENSG00000197150	105	87	151	83	70	78	4	2	14	15	24	47	84	87	114	81	66	39	114	188	76	147	155	166	90	204	193	185	104	223	338	15	87	17	17	32
ABCB9	ENSG00000150967	28	34	46	34	22	28	1	2	1	1	7	6	16	10	20	17	14	7	31	51	23	33	43	38	4	14	17	12	14	13	44	4	12	1	2	4
ABCC1	ENSG00000103222	83	97	199	114	89	92	7	5	8	12	28	37	38	36	61	61	40	27	133	214	88	142	178	162	65	155	175	153	75	180	324	13	58	11	10	18
ABCC10	ENSG00000124574	43	62	70	47	59	51	2	2	9	6	23	12	29	39	57	57	26	16	41	85	44	56	64	76	32	53	56	65	52	70	80	6	23	3	5	10
ABCC11	ENSG00000121270	0	1	0	0	0	2	1	0	0	0	0	0	1	0	1	0	0	0	0	0	0	0	0	1	0	0	0	0	1	0	0	0	1	1	0	0
ABCC12	ENSG00000140798	0	0	0	0	0	0	0	0	0	0	0	0	0	0	0	0	0	0	0	1	0	0	0	0	0	1	0	0	0	0	2	0	0	0	0	0
ABCC2	ENSG00000023839	2	6	9	13	14	13	0	0	2	1	0	0	0	0	1	0	0	0	1	6	1	0	2	4	0	5	3	4	0	2	7	0	1	0	0	0
ABCC3	ENSG00000108846	3	3	6	4	5	0	0	0	1	1	8	1	3	1	5	3	7	3	37	89	31	31	40	40	74	246	265	281	136	256	211	5	31	2	4	8
ABCC4	ENSG00000125257	81	150	227	151	111	151	5	4	2	8	32	14	35	65	58	48	60	14	115	192	61	118	119	127	33	121	75	86	66	93	87	9	37	4	6	12
ABCC5	ENSG00000114770	103	106	130	109	85	119	11	12	10	22	30	37	101	133	158	156	76	93	49	105	25	66	77	84	25	67	71	61	83	93	92	4	23	3	1	4
ABCC5-AS1	ENSG00000223882	0	0	0	0	0	0	0	0	0	0	0	0	0	0	0	0	0	1	0	0	0	0	0	0	0	0	0	0	0	0	0	0	0	0	0	0
ABCC6	ENSG00000091262	16	9	12	9	11	15	1	2	0	2	3	5	3	3	8	9	5	2	3	6	2	5	4	3	1	1	1	2	3	2	11	0	1	0	1	0
ABCC8	ENSG00000006071	0	0	0	0	0	0	0	0	0	0	0	0	0	0	0	0	0	0	0	0	0	0	0	0	0	0	0	1	0	0	0	0	0	0	0	0
ABCC9	ENSG00000069431	0	0	0	0	0	2	0	0	0	0	0	0	93	109	46	78	6	45	0	0	0	0	0	1	4	5	9	5	8	15	169	13	42	4	5	15
ABCD1	ENSG00000101986	8	17	24	13	16	12	3	2	2	2	5	12	20	34	31	37	14	10	39	77	30	49	69	44	20	45	28	29	26	52	59	2	14	2	3	7
ABCD2	ENSG00000173208	5	4	12	5	7	1	0	1	0	0	0	0	2	4	1	4	1	0	0	3	0	1	3	0	0	0	0	0	1	0	0	0	0	0	0	0
ABCD3	ENSG00000117528	174	174	241	188	154	185	6	22	16	9	38	84	132	152	183	125	107	84	213	363	127	208	251	315	126	253	268	276	188	324	335	17	80	23	16	37
ABCD4	ENSG00000119688	189	171	269	192	81	183	13	10	10	17	22	63	216	224	366	262	106	107	119	138	72	145	62	139	62	140	172	166	80	188	155	6	50	13	4	11
ABCE1	ENSG00000164163	1059	1006	1601	1255	827	1174	40	27	44	43	130	213	793	817	1177	805	548	424	878	1291	598	1159	1335	1629	374	1039	960	1233	386	854	1564	101	462	109	54	124
ABCF1	ENSG00000204574	1150	1059	1841	1311	1151	1307	52	38	76	58	197	315	934	857	1497	1022	688	541	1053	1783	802	1496	1749	1817	387	902	841	992	559	1043	1323	85	408	72	59	132
ABCF2	ENSG00000285292	0	0	0	0	0	0	0	0	0	0	0	0	0	0	0	0	0	0	1	0	0	0	0	0	0	0	0	2	0	0	2	0	0	0	0	0
ABCF2	ENSG00000033050	331	324	455	384	292	325	12	13	25	17	48	81	278	317	412	331	205	180	276	500	198	366	383	469	144	354	308	353	167	323	495	52	164	42	25	33
ABCF3	ENSG00000161204	90	99	150	85	102	105	6	3	10	8	29	43	114	94	165	119	76	65	118	161	65	107	129	177	59	148	157	145	76	159	235	10	51	22	9	12
ABCG1	ENSG00000160179	0	0	0	0	0	0	0	0	0	0	0	0	6	5	1	2	0	1	0	1	0	0	0	0	0	0	0	0	0	0	1	0	0	0	0	0
ABCG2	ENSG00000118777	122	217	177	125	231	216	8	4	15	1	12	40	5	6	7	2	6	0	5	20	7	10	11	17	0	2	0	1	1	2	2	0	1	0	0	0
ABCG4	ENSG00000172350	1	2	1	0	4	1	0	0	0	0	1	1	0	0	0	0	0	0	1	1	0	1	1	0	0	0	1	0	0	0	0	0	0	0	0	0
ABCG5	ENSG00000138075	0	1	0	0	0	0	0	0	0	1	0	0	0	1	0	0	0	0	0	0	0	1	0	0	0	0	0	0	0	0	0	0	0	0	0	0
ABCG8	ENSG00000143921	6	4	4	5	13	3	0	0	1	0	1	0	4	4	4	3	3	0	1	2	3	3	0	2	0	1	3	5	2	1	5	0	1	0	0	0
ABHD1	ENSG00000143994	1	3	4	0	0	2	0	1	0	0	1	1	1	3	4	1	2	1	1	0	0	0	0	5	0	1	1	1	1	0	2	0	0	0	0	0
ABHD10	ENSG00000144827	128	121	149	136	79	118	4	6	14	10	22	36	117	131	179	136	87	72	132	177	80	140	166	188	58	153	117	127	81	148	239	13	65	17	11	25
ABHD11	ENSG00000106077	94	100	104	66	65	72	3	4	7	5	29	50	91	70	98	74	46	39	129	263	110	172	240	239	131	237	204	237	130	289	410	21	106	19	14	29
ABHD12	ENSG00000100997	252	358	593	462	403	344	22	10	23	30	86	65	80	126	192	116	70	57	308	655	240	415	418	490	122	299	263	284	138	319	623	24	156	33	27	46
ABHD12B	ENSG00000131969	10	38	44	16	27	47	0	0	1	0	0	0	0	0	2	0	0	0	0	0	0	0	0	0	0	0	0	0	0	0	0	0	0	0	0	0
ABHD13	ENSG00000139826	81	67	97	81	66	81	5	4	7	6	21	39	88	107	121	101	61	44	83	119	66	109	110	94	39	78	89	78	50	81	159	5	38	5	6	14
ABHD14A	ENSG00000248487	166	142	233	125	96	145	9	12	16	16	37	55	110	116	187	135	83	61	115	245	92	143	139	154	73	187	164	196	99	173	222	15	50	9	8	19
ABHD14A-ACY1	ENSG00000114786	10	2	7	8	2	5	1	0	0	0	0	2	4	4	9	7	2	6	4	11	4	14	8	2	6	9	13	16	6	15	14	1	4	0	0	0
ABHD14B	ENSG00000114779	50	50	94	48	56	57	6	12	16	20	47	60	57	34	67	45	55	37	87	137	39	102	88	99	131	364	325	306	276	306	625	16	123	19	15	35
ABHD15	ENSG00000168792	4	8	13	13	11	12	1	1	2	0	8	11	6	18	18	15	14	7	14	47	9	14	32	20	8	28	29	42	16	27	46	6	12	4	4	5
ABHD15-AS1	ENSG00000264031	0	0	0	0	0	0	0	0	0	0	0	0	0	0	0	0	0	0	0	0	0	1	0	0	0	0	0	0	0	0	0	0	0	0	0	0
ABHD16A	ENSG00000204427	2	2	8	5	0	10	0	0	1	0	1	0	3	2	9	2	2	2	3	2	2	3	5	3	2	1	2	1	0	3	5	0	0	0	0	0
ABHD16B	ENSG00000183260	1	0	0	0	0	0	0	0	0	0	0	0	0	0	0	0	0	0	0	0	0	0	0	0	0	0	0	0	0	0	0	0	0	0	0	1
ABHD17A	ENSG00000129968	586	602	898	611	630	591	32	41	76	59	196	224	470	507	717	520	341	294	582	1017	423	757	932	814	258	560	543	494	379	619	1060	49	210	45	44	68
ABHD17B	ENSG00000107362	108	91	129	90	62	97	2	3	9	1	18	35	83	104	97	86	54	56	41	70	30	48	57	66	13	47	50	53	36	49	71	10	14	6	0	6
ABHD17C	ENSG00000136379	25	26	31	23	21	36	0	2	0	1	4	14	102	148	87	40	38	41	33	49	24	23	33	74	14	40	53	51	20	67	42	2	12	6	4	1
ABHD18	ENSG00000164074	42	35	85	35	39	45	5	1	4	4	15	16	45	39	65	50	26	31	44	63	39	36	58	45	15	44	50	48	33	72	68	4	21	3	1	4
ABHD2	ENSG00000140526	82	130	276	154	169	117	7	17	27	13	47	59	137	194	262	197	109	77	240	304	140	213	265	283	157	418	459	464	305	455	533	35	130	18	36	48
ABHD3	ENSG00000158201	50	44	53	43	31	36	2	2	5	1	2	15	16	21	25	11	12	7	32	44	22	48	61	42	18	52	36	74	22	50	49	3	13	2	1	6
ABHD4	ENSG00000100439	21	28	47	24	45	33	10	8	4	5	21	13	28	33	37	24	20	14	36	67	18	16	38	59	15	31	27	24	22	26	45	0	8	7	1	4
ABHD5	ENSG00000011198	108	100	128	90	73	115	7	4	9	8	21	35	64	91	114	73	61	36	170	341	101	191	254	263	243	493	481	533	209	450	284	44	126	49	9	32
ABHD6	ENSG00000163686	11	4	9	5	9	11	0	2	0	1	3	2	2	2	5	3	2	1	15	22	12	18	25	14	5	30	26	18	12	23	68	0	20	2	2	7
ABHD8	ENSG00000127220	43	26	51	20	27	34	4	2	6	5	15	21	47	45	60	42	37	29	46	96	34	53	108	98	50	104	78	93	72	102	121	3	24	4	5	5
ABI1	ENSG00000136754	127	124	196	125	138	128	6	14	19	17	42	43	159	180	273	184	130	85	192	307	142	225	306	280	80	261	251	245	176	232	319	21	107	26	11	30
ABI2	ENSG00000138443	731	572	833	538	419	566	29	37	54	31	105	200	383	512	619	445	301	240	494	773	326	662	749	600	257	584	548	506	416	739	835	36	199	37	23	78
ABI3	ENSG00000108798	35	33	91	58	44	36	2	5	2	0	12	11	21	11	29	8	25	6	132	87	112	165	183	213	6	12	20	17	11	31	2	0	1	0	0	3
ABI3BP	ENSG00000154175	4	0	1	0	1	3	0	0	0	0	1	0	9	9	20	18	12	10	0	28	3	2	3	11	21	58	18	23	16	59	912	44	175	68	34	154
ABL1	ENSG00000097007	97	128	153	88	131	127	8	8	4	7	24	40	65	67	65	62	60	39	98	201	73	137	183	187	124	253	290	326	198	310	455	20	116	25	24	41
ABL2	ENSG00000143322	219	251	669	360	467	277	14	12	54	63	168	100	800	574	1256	929	604	376	488	681	315	621	639	727	217	572	633	671	322	645	572	33	141	44	36	51
ABLIM1	ENSG00000099204	145	116	186	159	104	169	7	3	11	9	24	19	85	149	104	130	39	83	13	20	5	19	23	24	10	12	4	6	9	15	114	1	21	2	0	4
ABLIM2	ENSG00000163995	1	0	3	1	0	0	0	0	0	0	0	0	0	4	1	0	1	0	0	0	0	0	0	0	0	0	0	0	0	0	0	0	0	0	0	0
ABLIM3	ENSG00000173210	3	3	4	6	2	1	2	1	3	6	15	2	403	645	541	498	75	241	39	86	44	65	49	31	15	87	74	71	39	95	130	14	41	5	2	17
ABR	ENSG00000159842	73	90	118	110	97	75	4	6	10	11	30	26	88	89	141	97	59	37	176	287	104	216	226	211	56	158	130	139	72	119	220	8	57	7	7	26
ABRA	ENSG00000174429	2	1	1	2	1	2	0	0	0	1	0	0	21	24	17	14	5	3	0	0	0	0	1	0	0	0	0	0	0	0	0	0	0	0	0	0
ABRACL	ENSG00000146386	759	768	1434	905	827	745	51	48	80	86	254	276	332	379	635	399	356	196	843	1282	586	930	1190	1309	285	525	571	506	339	817	669	34	162	33	27	66
ABRAXAS1	ENSG00000163322	283	231	354	213	198	250	11	8	15	18	38	61	255	173	405	293	142	124	127	204	112	182	154	170	140	323	341	277	207	292	304	18	95	13	12	16
ABRAXAS2	ENSG00000165660	159	106	233	133	142	161	5	6	8	7	61	38	135	149	215	133	92	74	133	218	93	166	176	202	66	163	171	160	93	153	203	11	58	17	10	11
ABT1	ENSG00000146109	268	319	483	358	258	306	14	19	35	23	55	125	298	343	474	324	240	175	267	406	186	358	387	464	94	247	245	237	139	238	302	18	101	25	15	29
ABTB1	ENSG00000114626	4	8	11	10	4	5	2	4	3	1	15	13	34	36	42	34	23	25	38	59	25	49	43	49	36	119	107	80	92	112	98	5	17	9	4	6
ABTB2	ENSG00000166016	8	7	17	5	5	7	0	0	0	1	1	2	7	19	12	5	3	8	7	7	1	1	7	5	5	28	12	24	9	27	6	3	1	0	0	1
AC000032.1	ENSG00000260246	0	0	0	0	0	0	0	0	0	0	0	0	0	0	0	0	0	0	0	0	0	0	1	1	0	0	0	0	0	0	0	0	0	0	0	0
AC000058.1	ENSG00000223665	0	0	0	0	0	0	0	0	0	0	0	0	0	0	0	0	0	0	0	0	0	0	0	0	0	0	0	0	0	1	0	0	0	0	0	0
AC000068.1	ENSG00000185065	2	1	3	2	2	2	0	0	0	0	0	0	2	1	5	1	1	1	2	1	3	2	2	2	0	0	2	3	2	1	1	0	1	0	0	0
AC000068.2	ENSG00000273212	2	0	0	0	0	1	0	0	0	0	0	1	1	1	1	1	0	0	0	0	0	0	2	0	0	0	0	0	0	0	0	0	0	0	0	0
AC000068.3	ENSG00000273300	1	0	1	0	0	0	0	0	0	0	0	0	0	1	1	0	0	0	0	0	0	1	1	2	0	1	0	1	0	1	0	0	0	0	0	0
AC000403.1	ENSG00000278727	0	0	0	0	1	0	0	0	0	0	1	1	1	1	1	0	1	0	0	0	0	0	0	0	0	3	1	1	1	3	9	1	1	1	0	1
AC001226.1	ENSG00000274898	0	0	1	1	2	0	0	0	0	0	0	0	0	0	1	0	0	0	1	2	0	0	0	0	0	2	2	1	0	0	1	0	1	0	0	0
AC001226.2	ENSG00000283208	0	5	0	1	1	0	0	0	0	0	0	0	0	0	2	2	1	0	1	1	0	2	2	2	1	0	0	0	1	0	2	0	0	0	0	0
AC002064.1	ENSG00000225498	0	0	0	0	0	0	0	0	0	0	0	0	0	0	0	0	0	0	0	0	0	0	0	0	0	0	0	0	0	0	0	0	0	0	0	0
AC002066.1	ENSG00000237813	0	0	0	0	3	1	0	0	0	0	1	0	2	2	1	4	0	1	1	1	1	1	4	0	0	5	2	0	0	3	6	0	0	0	0	0
AC002070.1	ENSG00000248636	2	1	12	7	5	8	0	0	0	0	0	1	7	2	7	2	1	2	0	1	0	0	0	0	7	25	20	14	15	17	2	0	2	0	0	1
AC002074.1	ENSG00000285090	5	1	8	6	5	7	0	0	1	0	2	2	4	7	11	15	9	9	7	13	3	9	9	5	4	13	13	12	12	19	35	5	13	1	0	1
AC002076.1	ENSG00000234695	0	2	1	0	0	0	0	0	0	0	0	0	0	0	0	0	0	0	0	1	0	0	0	1	0	0	0	0	0	0	6	1	0	0	0	0
AC002094.2	ENSG00000265618	0	1	0	0	0	0	0	0	0	0	0	0	1	0	0	0	0	1	0	0	0	0	2	0	0	0	0	0	0	1	0	0	0	0	0	0
AC002115.1	ENSG00000267626	0	0	1	0	0	0	0	0	0	0	0	0	0	0	0	0	0	0	0	0	0	0	0	0	0	0	1	0	0	0	1	0	0	0	0	0
AC002116.2	ENSG00000267698	15	10	11	12	8	8	0	0	0	0	0	3	1	2	5	3	2	2	8	6	2	4	5	8	2	4	2	7	1	5	3	0	0	0	1	1
AC002128.2	ENSG00000271366	0	0	0	0	0	0	0	0	0	0	0	0	0	0	1	0	0	0	0	0	0	0	0	0	0	0	0	0	0	0	0	0	0	0	0	0
AC002306.1	ENSG00000259242	1	0	0	0	1	0	0	0	0	0	0	0	0	0	0	0	0	0	0	0	0	0	0	0	1	0	0	2	0	0	0	0	0	0	0	0
AC002310.1	ENSG00000235560	16	7	14	8	8	10	3	0	0	0	2	2	4	14	13	7	6	3	2	8	2	4	4	11	3	7	9	7	7	10	12	0	1	0	0	2
AC002310.2	ENSG00000239791	3	4	3	3	1	0	1	0	0	0	0	0	0	0	2	0	2	3	1	4	0	2	2	5	1	0	4	4	1	0	2	1	2	0	0	0
AC002310.4	ENSG00000260869	1	0	0	0	0	0	0	0	0	0	1	0	0	0	0	0	0	0	0	0	0	0	0	0	0	0	0	0	0	0	0	0	0	0	0	0
AC002347.1	ENSG00000261433	1	0	2	0	1	1	0	0	0	0	0	0	1	2	0	1	1	1	0	0	0	1	1	1	0	0	0	0	0	1	1	0	0	0	0	0
AC002378.1	ENSG00000225676	0	0	0	0	0	0	0	0	0	0	0	0	0	0	0	0	0	0	0	0	0	1	0	0	0	0	0	0	0	0	0	0	0	0	0	0
AC002384.1	ENSG00000283585	3	3	1	0	2	1	1	0	1	0	6	0	1	5	1	1	3	0	0	2	0	0	0	0	0	1	0	0	0	0	0	0	0	0	0	0
AC002398.1	ENSG00000267049	0	0	0	0	1	0	0	0	0	0	0	0	0	0	1	0	0	0	0	0	0	0	0	1	0	0	0	0	0	1	1	0	0	0	0	0
AC002398.2	ENSG00000267328	0	0	0	0	0	1	0	0	0	0	0	0	0	0	0	0	0	0	1	6	0	0	4	1	0	1	0	0	2	0	3	0	0	0	0	1
AC002401.2	ENSG00000250282	0	0	0	0	0	0	0	0	0	0	0	0	0	0	0	0	0	0	0	0	0	0	0	0	0	0	0	0	0	0	0	0	0	0	0	0
AC002401.3	ENSG00000275025	0	0	0	0	0	0	0	0	0	0	0	0	0	0	0	0	0	0	0	0	0	0	0	0	0	0	0	0	1	0	0	0	0	0	0	0
AC002401.4	ENSG00000276851	0	0	1	2	0	0	0	0	0	0	2	0	1	1	0	0	3	0	4	14	8	9	20	5	4	2	6	1	4	3	4	1	2	0	0	0
AC002407.1	ENSG00000283638	18	29	11	7	16	10	0	1	0	0	0	0	0	0	0	0	1	0	0	0	0	0	0	0	0	0	0	0	0	0	0	0	0	0	0	0
AC002429.2	ENSG00000236197	1	0	2	1	0	1	0	0	0	0	0	1	0	0	13	3	3	0	1	0	0	2	0	0	0	0	2	0	1	0	1	0	0	0	0	0
AC002451.1	ENSG00000231170	0	0	0	1	0	0	0	0	0	1	2	2	0	1	1	3	1	0	0	1	0	0	0	0	0	1	2	0	2	1	5	0	0	0	0	0
AC002454.1	ENSG00000237819	16	11	20	20	19	20	0	2	2	1	5	9	34	35	58	48	33	33	32	15	26	32	28	36	100	130	171	140	112	151	19	2	12	3	0	1
AC002456.1	ENSG00000223969	1	3	8	4	5	4	0	1	1	1	0	6	8	7	8	6	4	12	7	14	4	9	10	9	8	3	4	3	5	8	16	0	0	1	0	2
AC002463.1	ENSG00000223646	0	0	0	0	0	0	0	0	0	0	0	0	0	1	0	0	0	0	0	0	0	0	0	0	0	0	0	0	0	0	0	0	0	0	0	0
AC002467.1	ENSG00000241764	25	22	35	22	27	15	2	3	0	0	10	3	19	24	30	16	18	8	26	32	23	18	33	29	11	32	27	21	27	33	41	3	15	2	2	2
AC002470.1	ENSG00000272829	3	7	8	0	3	2	0	1	1	1	3	4	7	10	7	5	6	4	5	3	3	9	8	3	2	8	7	6	6	3	12	0	1	0	0	1
AC002480.2	ENSG00000232759	1	1	2	0	0	1	0	0	0	0	0	1	1	4	3	3	0	1	0	2	0	2	1	3	0	0	0	1	0	0	0	0	0	0	0	0
AC002480.3	ENSG00000232949	0	0	0	0	0	0	0	0	0	1	0	0	1	2	1	0	0	0	0	1	0	0	0	0	0	0	0	0	0	0	0	0	0	0	0	0
AC002480.4	ENSG00000238033	0	0	0	0	0	0	0	0	0	0	0	0	0	0	1	0	0	0	0	0	0	0	0	0	0	0	0	0	0	0	0	0	0	0	0	0
AC002550.1	ENSG00000261312	2	0	3	0	2	2	1	0	0	0	0	1	3	0	1	0	1	0	1	1	1	1	1	1	0	0	1	1	0	2	0	0	0	0	0	0
AC002550.2	ENSG00000276571	2	3	4	3	2	1	0	0	2	0	1	2	2	2	4	2	2	0	0	1	2	3	3	4	0	2	1	1	4	3	4	1	1	1	0	0
AC002553.1	ENSG00000227782	1	1	3	5	2	6	0	0	0	0	1	2	1	1	3	2	3	0	2	1	2	5	0	3	2	5	3	5	1	2	5	0	0	1	0	2
AC002553.2	ENSG00000275413	5	5	12	5	6	4	0	0	0	1	1	1	5	1	13	4	4	1	6	9	4	5	3	6	2	6	4	1	2	5	4	0	0	0	0	2
AC002558.2	ENSG00000261872	0	0	0	0	0	0	0	0	0	0	0	0	0	0	0	0	0	0	0	0	0	0	0	0	0	0	0	1	0	0	0	0	0	0	0	0
AC003002.2	ENSG00000268533	0	0	0	0	0	0	0	0	0	0	0	0	0	0	0	0	0	0	0	0	0	0	0	0	0	0	0	1	0	0	0	0	0	0	0	0
AC003002.3	ENSG00000269533	0	0	0	0	0	0	0	0	0	0	0	0	0	0	0	0	0	0	1	1	0	0	0	0	0	0	0	0	0	0	0	0	0	0	0	0
AC003005.2	ENSG00000268266	2	5	1	0	0	0	0	0	0	0	0	0	0	1	0	0	0	0	0	1	0	1	0	0	1	0	0	0	0	0	0	0	0	0	0	0
AC003006.1	ENSG00000269026	0	0	0	0	0	0	0	0	0	0	0	0	0	0	0	0	0	0	0	0	0	0	0	0	0	0	0	0	0	0	0	0	0	0	0	0
AC003035.1	ENSG00000212663	0	0	0	1	0	1	0	0	0	0	0	0	0	0	0	0	0	0	0	0	0	0	0	0	0	0	0	0	0	0	1	0	0	0	0	0
AC003035.2	ENSG00000233535	0	0	0	0	0	0	0	0	0	0	0	0	0	1	0	0	0	0	0	0	0	0	0	0	0	0	0	0	0	0	0	0	0	0	0	0
AC003043.2	ENSG00000285486	1	0	0	0	0	0	0	0	0	0	0	0	0	0	0	0	0	0	0	0	0	0	0	0	0	1	0	0	0	0	0	0	0	0	0	0
AC003070.1	ENSG00000267344	0	0	0	0	0	0	0	0	0	0	0	0	0	0	0	1	0	0	0	0	0	0	0	0	0	0	0	0	0	0	0	0	0	0	0	0
AC003070.2	ENSG00000267446	0	0	0	0	1	0	0	0	0	0	0	0	0	0	0	0	0	0	0	3	0	0	0	0	0	0	0	0	0	0	0	0	0	0	0	0
AC003084.1	ENSG00000234826	0	0	1	0	0	0	0	0	0	0	0	0	0	0	0	0	0	0	0	0	0	0	0	0	0	0	0	0	0	0	0	0	0	0	0	0
AC003092.1	ENSG00000236453	8	4	19	6	6	7	4	2	4	8	14	6	5	2	5	5	9	3	44	55	14	38	19	37	24	10	24	19	5	24	324	6	25	2	4	37
AC003092.2	ENSG00000236938	0	0	0	0	0	0	0	0	0	0	0	1	1	0	0	0	0	0	0	0	0	0	0	0	0	0	0	0	0	0	0	0	0	0	0	0
AC003098.1	ENSG00000267604	0	0	0	0	0	0	0	0	0	0	0	0	0	0	0	0	0	0	0	0	0	0	0	0	0	0	0	0	0	0	1	0	0	1	0	0
AC003101.1	ENSG00000228768	1	0	0	1	0	0	0	0	1	0	0	0	0	0	0	0	0	0	0	0	0	0	0	0	0	1	0	1	0	1	0	0	0	0	0	0
AC003101.2	ENSG00000278546	2	1	3	2	3	3	0	0	0	1	0	2	0	2	1	3	0	1	2	2	1	2	1	3	3	6	6	2	2	1	5	1	1	0	0	0
AC003102.1	ENSG00000260793	4	6	11	5	4	6	1	1	3	0	1	4	9	14	14	16	4	4	8	15	8	12	12	10	7	32	28	33	15	21	35	1	6	1	0	5
AC003681.1	ENSG00000279159	16	24	22	11	13	9	1	2	1	0	1	9	15	22	24	12	17	5	10	23	3	13	17	12	1	12	5	10	5	12	5	2	1	0	0	0
AC003682.1	ENSG00000268392	0	0	0	0	0	0	0	0	0	0	0	0	1	0	0	0	0	0	0	0	0	0	0	0	0	2	1	0	0	0	0	0	0	0	0	0
AC003685.1	ENSG00000229012	1	1	0	1	0	0	0	0	0	0	0	0	0	0	0	0	0	0	0	0	0	0	0	1	0	0	0	0	0	0	0	0	0	0	0	0
AC003956.1	ENSG00000268564	0	0	1	0	0	0	0	0	0	0	0	0	0	0	0	0	0	1	0	0	0	0	1	0	0	0	0	0	0	0	1	0	0	0	0	1
AC003958.2	ENSG00000234859	1	0	0	5	0	1	0	0	0	0	0	0	1	0	0	0	0	0	0	0	0	1	0	0	0	0	0	0	0	0	0	0	0	0	0	0
AC003965.1	ENSG00000263280	1	0	0	0	1	1	0	0	0	1	0	0	1	3	1	3	0	1	1	1	0	0	1	1	0	1	3	4	1	1	1	0	0	1	0	0
AC003984.1	ENSG00000235139	2	0	0	0	0	1	0	0	0	0	0	0	0	0	2	0	0	1	0	0	0	0	0	0	0	0	0	0	0	0	0	0	0	0	0	0
AC003985.2	ENSG00000260951	1	1	3	3	0	4	0	0	0	0	0	0	0	0	0	0	0	0	0	0	0	0	0	0	0	0	0	0	0	0	0	0	0	0	0	0
AC003986.1	ENSG00000229533	0	0	0	0	0	0	0	0	0	0	0	0	0	2	1	0	0	0	0	0	0	0	0	0	0	0	0	0	0	0	0	0	0	0	0	0
AC003986.2	ENSG00000232821	6	8	9	1	6	2	0	0	0	0	0	0	1	3	3	1	1	0	0	1	1	2	0	0	0	0	0	0	0	0	0	0	0	0	0	0
AC003986.3	ENSG00000236536	0	2	3	0	1	0	0	1	1	0	1	0	0	1	2	1	0	1	0	0	0	1	0	0	0	0	1	0	0	0	0	0	0	0	0	0
AC003991.1	ENSG00000228113	0	1	0	0	2	0	0	0	0	0	0	0	0	0	0	0	0	0	1	1	0	0	1	1	0	1	0	0	0	2	0	1	0	0	0	0
AC003991.2	ENSG00000254003	0	0	0	0	0	1	0	0	0	0	0	0	0	0	1	0	0	0	0	1	0	0	1	0	0	0	0	0	1	0	1	0	0	0	0	0
AC004012.1	ENSG00000233942	0	0	0	1	2	1	0	0	0	0	0	0	0	0	1	0	0	0	0	0	0	0	0	0	0	0	0	0	0	0	0	0	0	0	0	0
AC004034.1	ENSG00000262482	0	1	0	0	2	1	0	0	0	0	0	0	0	1	2	2	0	0	0	0	0	0	0	0	0	0	0	0	0	0	0	0	0	0	0	0
AC004039.1	ENSG00000230612	1	0	0	0	0	0	0	0	0	0	0	0	0	0	0	0	0	0	1	1	0	0	0	0	1	0	0	0	0	0	1	0	0	0	0	0
AC004067.1	ENSG00000273447	0	1	2	0	0	0	0	0	0	0	0	0	1	1	4	5	1	1	3	1	2	0	1	4	0	2	2	2	3	0	2	0	1	0	2	0
AC004069.1	ENSG00000251259	4	0	4	4	1	4	0	0	0	0	1	0	4	3	7	9	1	0	2	1	3	1	4	1	2	6	4	4	4	7	8	0	2	0	0	1
AC004076.1	ENSG00000268163	0	0	0	0	0	0	0	0	0	0	0	0	0	0	0	0	0	0	1	0	0	0	0	0	0	0	0	0	0	0	0	0	0	0	0	0
AC004076.2	ENSG00000276449	12	11	7	14	8	8	0	1	0	2	2	1	12	11	13	5	2	4	3	9	9	12	6	6	6	9	8	5	5	6	7	2	1	0	1	0
AC004080.3	ENSG00000257184	0	0	0	0	0	0	0	0	0	0	0	0	0	0	0	0	0	0	0	0	0	0	0	0	0	1	0	0	0	0	0	0	0	0	0	0
AC004080.5	ENSG00000272801	0	0	0	0	0	0	0	0	0	0	0	0	0	0	0	0	0	0	3	0	0	0	0	1	0	0	1	0	0	0	0	0	0	0	0	0
AC004130.1	ENSG00000271133	15	17	25	21	14	26	1	0	6	2	7	9	19	25	34	34	17	16	5	3	4	9	4	15	2	2	2	0	1	4	3	0	0	0	0	0
AC004148.1	ENSG00000262099	0	0	1	0	0	0	0	0	0	0	0	0	0	0	0	0	1	0	0	7	0	0	0	0	0	0	0	1	0	0	0	0	0	0	0	0
AC004148.2	ENSG00000263272	81	70	224	147	59	85	4	1	6	8	20	13	97	83	225	149	42	27	38	25	52	87	47	68	20	58	100	109	31	62	76	5	56	14	1	5
AC004156.1	ENSG00000267666	1	3	0	1	2	0	0	0	0	0	0	0	4	1	1	1	0	0	1	1	0	0	0	0	0	5	2	0	1	0	3	0	0	0	0	0
AC004158.1	ENSG00000260664	4	0	1	0	0	1	0	1	0	0	0	0	0	1	0	1	1	0	0	1	0	0	0	3	0	0	0	2	1	0	1	0	0	0	0	0
AC004160.1	ENSG00000230333	0	1	0	1	0	2	0	0	0	1	0	0	1	0	3	0	0	0	0	1	0	0	0	0	0	2	11	14	2	3	3	1	0	0	0	0
AC004160.2	ENSG00000230435	0	0	0	0	0	0	0	0	0	0	0	0	0	0	0	0	0	0	0	0	0	0	0	0	0	0	1	0	0	0	1	0	0	0	0	0
AC004221.1	ENSG00000267778	0	1	1	0	1	1	0	0	0	0	0	0	0	0	0	2	0	0	0	1	1	0	0	0	0	0	0	1	0	1	1	0	0	0	0	0
AC004223.2	ENSG00000267457	0	0	0	0	0	0	0	0	0	0	0	0	0	0	0	0	1	0	1	1	0	0	2	2	0	0	1	0	0	1	1	0	0	0	0	0
AC004223.3	ENSG00000267618	0	0	0	0	0	0	0	0	0	0	0	0	0	0	0	0	0	0	0	0	0	0	0	0	0	0	0	0	0	0	1	0	0	0	0	0
AC004223.4	ENSG00000273687	4	4	6	2	4	3	0	0	0	0	0	0	0	0	0	1	2	0	2	0	0	4	0	0	0	0	3	1	1	1	1	0	0	0	0	0
AC004231.1	ENSG00000234477	1	0	0	0	2	0	0	0	1	0	0	0	2	0	0	0	1	1	1	1	0	0	0	0	0	2	0	1	0	2	0	0	0	1	0	0
AC004232.2	ENSG00000262899	0	0	0	0	1	0	0	0	0	0	0	1	4	0	0	1	0	0	0	1	0	0	0	0	0	2	0	0	0	0	1	0	1	0	0	0
AC004233.2	ENSG00000270168	0	0	1	0	0	0	0	0	0	0	0	1	5	9	3	4	0	4	0	0	0	0	0	0	0	0	1	0	0	0	0	0	0	0	0	0
AC004233.3	ENSG00000272079	0	0	2	3	1	0	0	1	0	0	0	0	1	4	0	2	0	0	3	2	1	1	4	2	1	4	6	5	0	1	2	0	0	0	0	0
AC004233.4	ENSG00000274367	0	1	0	0	0	0	0	0	0	0	0	0	0	1	0	0	0	0	1	1	0	0	0	1	0	0	0	1	1	0	0	0	0	0	0	0
AC004241.1	ENSG00000257433	20	12	19	6	18	13	1	0	1	2	5	7	11	10	11	11	4	3	10	25	4	10	4	8	4	14	3	7	7	13	21	1	4	1	1	4
AC004241.2	ENSG00000274902	1	0	0	1	1	0	0	0	0	0	0	1	0	0	0	0	0	0	0	1	0	0	0	0	0	1	0	0	0	0	3	0	0	0	0	0
AC004257.1	ENSG00000269635	0	1	1	0	1	3	0	0	0	0	0	0	0	0	0	1	0	0	1	1	2	0	2	0	1	0	1	0	1	1	4	0	0	0	0	0
AC004263.1	ENSG00000275936	1	0	2	0	0	2	0	0	0	0	0	1	0	1	0	0	1	0	0	0	0	0	0	0	0	0	2	1	0	0	0	0	0	0	0	0
AC004264.1	ENSG00000268812	1	1	1	1	3	1	0	0	0	0	2	0	0	9	1	0	1	0	5	13	4	3	1	3	4	3	0	2	4	4	10	0	1	0	0	0
AC004408.1	ENSG00000266101	0	0	0	0	0	0	0	0	0	0	0	0	2	1	1	0	0	0	0	0	0	0	0	0	0	0	0	0	0	0	0	0	0	0	0	0
AC004449.1	ENSG00000261204	1	1	0	1	0	0	0	0	0	0	0	0	1	0	0	0	1	0	0	0	0	0	0	1	0	1	0	1	0	0	0	0	0	0	0	0
AC004466.1	ENSG00000268069	0	1	1	0	0	0	0	1	0	0	0	0	0	0	2	0	0	0	0	2	0	0	1	1	0	1	1	0	0	0	0	0	0	0	0	0
AC004466.3	ENSG00000276691	0	0	0	0	1	0	0	0	0	0	0	1	0	0	0	0	0	0	0	0	0	0	1	0	0	0	0	0	0	0	0	0	0	0	0	0
AC004471.2	ENSG00000272682	0	0	0	0	0	0	0	0	0	0	0	0	0	0	0	0	0	0	0	0	0	0	0	0	0	0	0	1	0	0	0	0	0	0	0	0
AC004477.1	ENSG00000263412	11	4	18	9	7	8	0	0	0	1	3	2	20	15	14	18	7	3	5	6	3	6	5	6	3	15	7	7	5	6	12	0	2	0	0	1
AC004477.3	ENSG00000278765	1	1	0	2	1	2	0	0	0	0	0	1	1	4	1	0	1	0	1	2	0	2	1	0	0	4	0	5	2	4	3	0	0	0	0	0
AC004490.1	ENSG00000267122	0	0	0	1	0	0	0	0	0	0	0	0	2	2	4	0	0	3	0	0	0	0	0	0	1	0	1	0	0	0	0	0	0	0	0	1
AC004492.1	ENSG00000272072	3	0	0	3	1	0	0	0	0	0	0	0	0	3	1	0	1	0	0	0	0	2	0	2	0	1	2	0	2	0	3	0	0	0	0	0
AC004494.1	ENSG00000262312	5	9	8	1	5	14	0	0	1	0	2	2	7	5	7	7	0	2	0	4	0	3	2	1	1	8	6	7	0	3	5	0	0	0	0	1
AC004520.1	ENSG00000273237	0	0	2	3	1	0	0	0	0	0	0	0	5	2	2	4	1	0	0	0	1	2	0	0	0	2	0	0	0	0	0	0	0	0	0	0
AC004522.2	ENSG00000237640	0	1	0	0	0	0	0	0	0	0	0	0	0	0	0	0	0	0	0	1	0	0	0	0	0	0	1	0	0	0	0	0	0	0	0	0
AC004528.1	ENSG00000266990	0	2	0	1	0	0	0	0	0	0	0	0	1	1	1	0	0	0	2	0	0	1	0	2	0	0	0	2	0	0	0	0	0	0	0	0
AC004528.2	ENSG00000274177	0	1	0	1	0	0	0	0	0	0	0	0	0	0	1	0	0	0	0	0	0	0	0	0	0	0	1	0	0	0	0	0	0	0	0	0
AC004540.1	ENSG00000214870	15	7	2	11	3	8	0	0	0	0	0	0	1	2	1	0	0	1	0	0	0	0	0	0	0	0	0	0	0	0	1	0	0	0	1	0
AC004540.2	ENSG00000225792	9	2	2	3	0	7	0	0	0	1	0	0	1	0	0	0	0	1	0	0	0	0	0	0	0	0	0	0	0	0	0	0	0	0	0	0
AC004542.1	ENSG00000269972	0	0	0	0	0	1	0	0	0	0	0	0	0	0	0	0	0	0	0	0	0	0	0	0	0	0	0	0	0	0	0	0	0	0	0	0
AC004542.2	ENSG00000269987	0	1	0	0	0	1	0	0	0	0	0	0	1	0	0	0	0	0	1	0	0	0	1	0	0	0	1	0	0	0	0	0	0	0	0	0
AC004554.2	ENSG00000282840	0	0	0	0	0	0	0	0	0	0	0	0	0	0	1	0	0	0	0	0	0	0	0	0	0	0	0	0	0	0	0	0	1	0	0	0
AC004556.1	ENSG00000276345	150	2	240	2	146	3	3	0	5	0	21	0	65	4	141	0	47	1	255	4	166	1	349	6	95	5	199	3	131	11	341	0	86	1	11	2
AC004585.1	ENSG00000266088	0	0	1	0	0	0	0	0	0	0	0	0	0	0	0	0	0	0	4	11	3	3	5	6	19	17	21	20	14	24	22	0	1	1	1	0
AC004590.1	ENSG00000251239	0	0	0	0	0	0	0	0	0	0	0	0	0	0	0	0	0	0	0	1	1	1	2	1	0	3	3	0	3	3	2	0	1	1	0	0
AC004593.3	ENSG00000285162	2	1	1	0	2	0	0	0	0	0	0	0	0	0	0	0	1	0	0	0	0	0	0	0	0	0	0	0	0	0	0	0	0	0	0	0
AC004596.1	ENSG00000267394	0	0	0	0	0	0	0	0	0	0	0	0	0	0	0	0	0	0	0	1	0	0	0	0	0	0	0	0	0	0	0	0	0	0	0	0
AC004672.1	ENSG00000249028	0	0	0	0	0	0	0	0	0	0	0	0	0	0	0	0	0	0	0	0	0	0	0	0	0	0	0	1	0	1	0	0	0	0	0	0
AC004687.1	ENSG00000265206	0	0	0	4	0	0	0	0	0	0	1	0	0	1	1	0	1	0	6	17	2	9	4	1	3	0	6	4	5	9	0	0	0	0	1	0
AC004692.2	ENSG00000228680	0	0	0	0	0	0	0	0	0	0	0	0	0	0	0	0	0	1	0	0	0	0	0	0	0	0	0	0	0	0	0	0	0	0	0	0
AC004704.1	ENSG00000249815	11	10	9	36	4	6	0	0	0	0	0	0	0	0	0	0	0	0	0	0	0	0	0	0	0	0	0	0	0	0	0	0	0	0	0	0
AC004754.1	ENSG00000269881	0	0	0	1	1	0	0	1	0	0	1	1	0	2	2	0	0	0	1	0	0	0	0	3	0	2	0	0	0	2	1	0	0	0	0	0
AC004771.1	ENSG00000227495	0	0	0	0	0	0	0	0	0	0	0	0	0	0	0	0	0	0	0	0	0	0	0	1	0	0	0	0	0	0	0	0	0	0	0	0
AC004771.2	ENSG00000234203	0	3	1	1	3	2	0	0	0	1	1	1	2	0	2	4	1	1	0	0	0	0	0	0	0	0	0	1	2	0	1	0	0	0	0	2
AC004771.3	ENSG00000262227	3	1	0	1	1	4	0	0	1	0	2	0	1	2	2	2	0	1	5	3	4	2	4	2	1	3	2	2	3	0	5	0	0	0	0	0
AC004771.4	ENSG00000262429	1	0	2	1	0	4	1	0	0	0	1	3	0	2	2	1	1	0	1	3	1	0	0	2	1	5	1	0	0	1	0	0	0	0	0	0
AC004771.5	ENSG00000262678	0	1	0	1	1	0	0	0	0	0	0	0	0	0	0	0	0	0	0	2	0	0	0	0	0	1	0	0	0	2	3	0	1	0	0	1
AC004775.1	ENSG00000272203	0	2	0	1	0	0	0	0	0	0	0	0	0	0	0	0	0	0	0	0	0	0	0	0	0	0	1	1	0	0	0	0	0	0	0	0
AC004784.1	ENSG00000282943	0	0	0	1	1	2	0	0	1	0	2	0	0	0	1	1	0	0	0	0	0	2	4	1	1	0	0	0	0	2	0	0	0	0	0	0
AC004797.1	ENSG00000177369	0	0	0	0	0	0	0	0	0	0	0	0	1	0	0	2	0	0	0	1	0	0	0	0	0	1	0	0	0	0	0	0	0	0	0	0
AC004801.3	ENSG00000257955	0	0	0	0	0	0	0	0	0	0	0	0	0	0	0	0	0	0	0	0	0	0	0	0	0	0	0	0	1	0	0	0	0	0	0	0
AC004801.6	ENSG00000276814	0	0	3	0	1	4	0	0	1	0	0	0	1	2	3	1	0	1	1	0	2	2	1	0	1	4	0	1	2	3	4	0	1	0	0	0
AC004803.1	ENSG00000250132	17	21	19	15	17	16	2	0	2	3	2	6	15	17	27	17	9	7	7	12	3	5	22	6	5	22	8	16	10	15	9	3	2	0	2	1
AC004812.2	ENSG00000277283	15	16	22	19	13	15	2	0	1	0	3	11	16	33	17	25	13	6	30	47	23	44	21	34	10	45	44	35	27	39	62	5	16	6	3	6
AC004816.1	ENSG00000259153	8	4	17	13	17	20	2	1	2	3	8	6	5	1	10	11	5	7	9	1	1	6	11	12	5	3	4	3	2	24	1	0	0	0	0	0
AC004816.2	ENSG00000275630	3	1	0	1	0	0	0	0	0	0	0	1	2	2	2	7	0	2	7	9	2	9	5	3	11	5	12	7	4	8	84	0	12	1	1	3
AC004817.3	ENSG00000269927	1	0	2	2	0	1	0	0	0	1	1	0	0	0	1	0	0	0	22	14	4	18	8	9	6	13	10	18	13	15	1	0	0	0	0	0
AC004817.4	ENSG00000269945	0	1	0	0	0	0	0	0	0	0	0	0	0	0	0	0	0	0	0	0	0	0	0	0	0	0	0	0	0	0	0	0	0	0	0	0
AC004824.1	ENSG00000227751	0	0	0	0	0	0	0	0	0	0	0	0	0	0	0	0	0	0	0	0	0	0	0	0	0	0	0	0	0	0	0	0	0	0	0	0
AC004825.2	ENSG00000274818	5	3	6	11	7	7	0	0	0	1	1	0	3	6	8	9	2	2	9	14	5	13	6	4	4	6	9	9	8	7	17	0	2	1	0	1
AC004828.1	ENSG00000258871	0	0	0	0	0	0	0	0	0	0	0	0	0	0	0	0	0	0	0	0	0	1	0	0	0	0	0	0	0	0	0	0	0	0	0	0
AC004832.3	ENSG00000249590	0	0	0	0	0	0	0	0	0	0	0	0	0	0	0	0	0	0	1	2	1	0	0	0	0	0	0	0	0	0	2	0	0	0	0	0
AC004832.6	ENSG00000273428	1	0	0	0	0	0	0	0	0	0	0	0	1	0	0	0	0	0	0	1	0	2	1	1	0	0	0	2	0	1	0	0	0	0	0	0
AC004834.1	ENSG00000284523	2	0	2	1	0	0	0	0	0	0	0	1	2	1	1	0	0	1	1	1	1	3	1	0	0	0	1	3	1	1	2	0	0	0	0	0
AC004837.2	ENSG00000228554	0	0	0	0	0	0	0	0	0	0	0	0	0	0	0	0	0	0	0	0	0	0	0	0	0	0	0	0	0	0	0	0	1	0	0	0
AC004839.1	ENSG00000272854	2	3	8	4	3	3	0	0	1	0	0	0	3	3	3	2	0	0	2	0	3	8	6	1	2	5	5	8	4	2	4	0	0	1	0	0
AC004846.1	ENSG00000258376	8	2	11	7	3	2	0	1	0	1	1	1	6	0	17	4	3	3	4	0	5	2	1	2	8	2	19	14	15	10	29	1	10	1	0	0
AC004846.2	ENSG00000258944	1	1	6	1	5	2	0	0	0	0	3	0	3	1	3	1	0	0	4	9	4	4	8	7	2	6	4	1	2	5	18	0	3	0	1	2
AC004854.2	ENSG00000272768	4	8	7	9	3	7	0	0	0	1	0	0	22	14	33	21	13	11	8	11	4	5	7	5	1	13	15	13	9	8	7	0	1	1	1	0
AC004862.1	ENSG00000232667	0	0	0	0	0	0	0	0	0	0	0	0	0	0	0	0	1	1	0	0	1	0	0	0	0	0	0	0	0	0	0	0	0	0	0	0
AC004865.2	ENSG00000239636	9	7	5	6	4	3	0	0	0	0	1	2	7	1	6	7	3	1	1	9	2	1	0	2	0	3	1	0	3	0	7	0	1	0	0	0
AC004870.2	ENSG00000223829	0	0	0	0	0	0	0	0	0	0	0	0	0	0	0	0	0	0	1	4	0	0	0	0	0	0	2	0	3	0	0	0	0	0	0	0
AC004870.3	ENSG00000229192	0	0	0	0	0	1	0	0	0	0	0	0	0	0	0	0	0	0	0	0	0	0	0	0	0	0	0	0	0	0	0	0	0	0	0	0
AC004870.4	ENSG00000232072	0	0	0	0	0	0	0	0	0	0	0	0	1	3	0	0	0	0	0	0	0	0	0	0	0	0	0	0	1	0	0	0	0	0	0	0
AC004877.1	ENSG00000273419	1	1	1	0	0	1	0	0	0	0	0	0	0	0	1	0	0	0	0	0	0	0	0	0	0	0	0	0	0	1	1	0	0	0	0	0
AC004884.2	ENSG00000242154	0	1	1	1	1	0	0	0	0	0	0	0	1	0	0	0	0	0	2	0	0	0	0	0	0	0	0	1	0	0	0	0	0	0	0	0
AC004889.1	ENSG00000244198	2	2	5	4	1	1	0	0	1	0	0	1	1	2	1	4	0	0	0	3	0	0	2	0	1	0	2	2	0	1	5	0	1	0	0	0
AC004895.1	ENSG00000231704	0	1	1	1	0	0	0	0	0	0	0	0	0	0	0	0	0	0	0	0	0	0	0	0	0	1	0	0	1	0	0	0	0	0	0	0
AC004908.3	ENSG00000273402	1	0	0	1	0	0	0	0	0	0	0	0	3	0	2	1	1	0	0	0	0	2	0	0	0	1	0	1	2	2	2	0	0	0	0	0
AC004918.1	ENSG00000244701	2	7	13	6	11	5	0	0	1	0	1	1	6	7	4	4	3	1	12	12	8	8	17	16	0	3	3	0	6	3	5	1	5	1	0	0
AC004920.1	ENSG00000236046	0	0	0	0	0	0	0	0	0	0	0	0	0	0	0	0	0	0	0	0	0	0	0	0	0	0	0	0	0	0	0	0	1	0	0	0
AC004921.1	ENSG00000273341	0	0	0	0	0	0	0	0	0	0	0	0	0	0	0	0	0	0	0	0	0	1	0	0	0	0	0	0	0	0	0	0	0	0	0	0
AC004922.1	ENSG00000284292	4	2	1	3	7	3	1	0	0	0	0	1	0	1	1	0	0	1	13	17	7	11	14	19	3	1	1	1	1	3	2	0	1	1	0	1
AC004923.4	ENSG00000255306	1	0	1	2	0	3	0	0	0	0	0	0	0	0	3	4	1	2	1	0	0	2	3	0	0	0	1	0	0	3	1	0	0	0	0	0
AC004930.1	ENSG00000241324	0	0	0	0	0	0	0	0	0	0	1	1	5	6	3	4	1	0	0	0	0	0	0	0	0	0	0	0	0	0	0	0	0	0	0	0
AC004941.1	ENSG00000228151	0	0	1	0	0	0	0	0	0	0	0	0	0	0	0	0	0	0	0	0	0	0	0	0	0	0	0	0	0	1	0	0	0	0	0	0
AC004943.1	ENSG00000259209	0	1	4	2	0	1	0	0	0	1	0	0	1	0	1	0	0	4	0	3	0	1	0	1	1	1	1	1	1	0	1	1	0	0	0	0
AC004943.2	ENSG00000259768	27	20	29	16	6	20	1	0	1	0	1	9	10	9	15	12	6	4	14	12	6	11	8	14	11	8	12	13	6	10	24	0	5	1	3	3
AC004943.3	ENSG00000279206	0	1	0	0	0	0	0	0	0	0	0	0	0	0	0	0	0	0	0	0	1	0	0	0	0	1	0	0	0	0	0	0	0	0	0	0
AC004948.1	ENSG00000272745	0	1	0	0	0	0	1	0	0	0	0	0	0	0	0	0	0	0	0	0	0	0	1	0	1	0	1	1	0	0	2	0	0	0	0	0
AC004951.1	ENSG00000228434	85	103	140	91	88	92	6	5	5	8	30	20	103	102	155	127	71	55	56	83	47	86	105	82	28	71	85	103	68	70	105	3	34	2	5	8
AC004951.4	ENSG00000273432	2	0	2	1	1	1	0	0	1	1	1	0	1	4	3	1	2	1	5	3	2	2	0	3	1	1	2	3	1	4	3	0	0	2	0	0
AC004969.1	ENSG00000238358	0	0	0	0	0	0	0	0	0	0	0	0	1	0	0	0	1	0	0	0	0	0	0	0	0	0	1	0	0	0	0	0	0	0	0	0
AC004973.1	ENSG00000226661	0	0	0	0	0	0	0	0	0	0	0	0	0	0	0	0	0	0	0	0	0	0	0	1	0	0	0	0	1	0	0	0	0	0	0	0
AC004982.1	ENSG00000272732	0	0	0	0	0	1	0	0	0	0	0	0	0	0	2	1	1	0	1	0	0	1	0	0	3	6	4	5	2	2	5	0	0	0	0	0
AC004982.2	ENSG00000272894	7	8	4	6	7	8	2	0	3	0	0	2	6	15	16	5	5	7	7	15	1	11	13	10	13	16	15	7	10	21	14	0	2	0	0	1
AC004988.1	ENSG00000203446	0	1	1	1	0	1	0	0	0	0	0	0	0	0	0	0	0	0	0	0	0	0	0	0	0	0	0	1	0	0	0	0	0	0	0	0
AC004990.1	ENSG00000232756	0	0	0	0	0	0	0	0	0	0	0	0	0	0	0	0	0	0	0	0	0	0	0	1	0	0	0	0	0	1	0	0	0	0	0	0
AC004994.1	ENSG00000226522	0	0	0	0	0	0	0	0	0	0	0	0	0	0	0	0	0	1	0	0	0	0	0	0	0	0	0	0	0	0	0	0	0	0	0	0
AC005005.3	ENSG00000273387	0	1	1	0	0	1	0	0	0	0	0	1	0	0	3	2	0	1	0	0	0	0	0	1	0	1	0	0	0	0	1	0	0	0	0	0
AC005009.1	ENSG00000231255	1	0	0	0	0	0	0	0	0	0	0	0	0	0	0	0	0	0	0	0	0	0	0	0	0	0	0	0	0	0	0	0	0	0	0	0
AC005009.2	ENSG00000233073	0	1	0	1	2	0	0	0	0	0	0	1	1	0	0	0	0	0	1	0	0	0	0	0	0	0	0	0	0	0	0	0	0	0	0	0
AC005013.1	ENSG00000228421	0	1	0	1	2	2	0	0	0	0	0	0	0	0	0	0	0	0	0	0	0	0	0	0	0	0	0	0	0	0	0	0	0	0	0	0
AC005014.2	ENSG00000272361	6	1	6	1	1	2	0	0	0	1	0	0	1	4	5	2	1	0	3	6	0	4	1	0	2	3	3	5	0	2	4	1	2	0	0	0
AC005019.2	ENSG00000224330	0	0	16	0	0	0	0	0	0	0	0	0	0	0	0	0	0	0	0	0	0	0	0	0	0	0	0	0	0	0	1	0	0	0	0	0
AC005021.1	ENSG00000273138	0	0	0	0	0	1	0	0	0	0	0	0	0	0	0	0	0	0	0	0	0	0	0	0	0	0	0	0	0	0	0	0	0	0	0	0
AC005034.2	ENSG00000270462	0	1	0	0	0	0	0	0	0	0	0	0	0	0	0	0	0	0	0	0	0	0	0	0	0	1	0	1	0	0	1	0	0	0	0	0
AC005034.3	ENSG00000270696	23	25	36	24	23	18	2	0	2	1	4	6	19	14	22	10	11	10	19	34	12	23	12	22	7	10	10	16	8	17	35	0	4	4	0	2
AC005034.4	ENSG00000270996	0	2	0	0	1	0	0	0	0	0	0	1	0	2	0	0	0	1	0	2	0	1	0	0	1	0	1	0	0	1	0	0	0	0	0	0
AC005037.1	ENSG00000183308	3	8	10	3	10	3	0	0	2	0	3	2	2	6	8	2	3	2	7	15	5	7	4	3	1	5	3	2	2	3	3	1	1	1	0	0
AC005041.1	ENSG00000159239	0	1	0	0	0	0	0	0	0	0	0	0	0	0	0	0	0	0	0	0	0	0	0	0	0	1	0	0	0	1	0	0	0	0	0	0
AC005041.3	ENSG00000272183	0	0	0	0	0	0	0	0	0	0	0	0	0	0	0	0	0	0	0	0	0	0	0	0	0	1	1	0	0	0	0	0	0	0	0	0
AC005046.1	ENSG00000273055	0	1	2	0	0	1	0	0	0	0	2	0	1	1	2	2	0	1	0	1	0	0	2	0	1	2	1	2	0	3	6	0	2	0	0	0
AC005050.1	ENSG00000267052	0	0	0	0	0	0	0	0	0	0	0	0	1	0	1	0	1	0	0	0	0	0	0	1	0	0	0	0	0	0	0	0	0	0	0	0
AC005070.3	ENSG00000272918	6	10	7	12	7	4	0	0	1	2	2	2	6	14	19	8	8	5	7	11	1	6	13	10	4	10	13	9	4	13	12	0	5	0	1	1
AC005076.1	ENSG00000224046	12	15	12	13	12	11	1	0	0	2	5	9	17	34	21	14	14	9	6	11	5	8	10	8	7	10	14	11	7	16	23	1	4	0	0	1
AC005082.1	ENSG00000226816	0	0	1	4	3	2	1	0	0	0	3	2	0	0	5	6	5	2	0	0	0	0	1	0	0	0	0	0	1	0	0	0	1	0	0	0
AC005083.1	ENSG00000233834	0	0	0	0	0	2	0	0	0	0	0	0	0	0	0	0	0	0	0	0	0	0	0	1	0	0	0	0	0	1	0	0	0	0	0	0
AC005091.1	ENSG00000229893	0	0	0	0	0	0	0	0	0	0	0	0	0	0	0	0	0	0	0	0	0	0	0	0	0	0	0	0	1	1	0	0	0	0	0	0
AC005096.1	ENSG00000259294	1	0	0	0	0	0	0	0	0	0	0	0	2	1	0	2	0	0	0	0	0	0	0	1	0	0	0	0	0	0	0	0	0	0	0	0
AC005144.1	ENSG00000283517	0	0	1	0	0	0	0	0	0	0	0	0	0	0	0	0	0	0	1	1	0	0	0	1	0	0	0	0	0	0	0	0	0	0	0	0
AC005150.1	ENSG00000248431	0	0	0	0	0	0	0	0	0	0	0	0	0	0	1	0	0	0	0	0	0	0	0	0	0	0	0	0	0	0	0	0	0	0	0	0
AC005154.1	ENSG00000196295	93	95	113	88	68	110	7	6	13	5	17	43	85	110	104	107	60	50	49	118	51	86	93	79	49	138	112	114	108	136	127	6	30	6	9	4
AC005154.5	ENSG00000264520	0	0	0	0	0	0	0	0	0	0	0	0	0	0	0	0	0	0	0	0	0	0	0	0	0	0	0	1	0	0	0	0	0	0	0	0
AC005162.3	ENSG00000272568	11	2	6	7	5	6	1	1	0	0	0	7	1	1	1	2	0	0	0	0	0	0	0	0	0	0	0	0	0	0	0	0	0	0	0	0
AC005165.1	ENSG00000223561	1	0	0	0	1	0	0	0	0	0	0	0	1	3	0	0	0	0	1	0	0	0	0	1	0	0	0	0	1	1	0	0	0	0	0	0
AC005180.1	ENSG00000267405	0	0	0	0	1	1	0	0	1	0	1	1	0	0	0	0	0	0	0	3	0	0	3	0	0	0	0	0	0	0	0	0	0	0	0	0
AC005180.2	ENSG00000267505	0	0	0	1	0	0	0	0	0	0	0	0	0	0	0	1	0	0	0	1	0	0	0	0	0	0	0	1	0	0	0	0	0	0	0	0
AC005186.1	ENSG00000275212	0	0	0	0	0	0	0	0	0	0	0	0	0	0	0	0	0	0	0	0	0	0	0	0	0	0	0	0	0	1	0	0	0	0	0	0
AC005197.1	ENSG00000269694	0	0	0	1	0	0	0	0	0	0	0	0	0	0	0	0	0	0	0	0	0	0	0	0	0	0	0	1	0	1	0	0	0	0	0	0
AC005208.1	ENSG00000230258	0	0	0	0	0	0	0	0	0	0	0	0	0	0	1	0	0	1	0	0	0	0	0	0	0	0	0	0	0	0	0	0	0	0	0	0
AC005220.1	ENSG00000236352	0	0	1	1	0	0	0	0	0	0	0	0	0	2	1	1	0	0	1	1	2	1	1	1	0	0	0	1	1	2	0	0	0	0	0	0
AC005224.1	ENSG00000231595	10	10	6	7	6	15	0	0	0	0	0	0	7	4	9	3	2	2	4	3	3	2	1	7	1	2	2	6	1	5	4	2	2	0	0	0
AC005224.3	ENSG00000266378	18	8	21	11	22	9	1	2	0	0	2	4	3	1	1	1	1	3	37	18	14	31	29	38	2	16	10	15	8	19	20	0	12	2	2	2
AC005224.4	ENSG00000266709	3	2	2	3	4	0	0	0	0	0	0	0	1	0	0	0	0	1	7	5	6	9	10	7	1	1	2	3	1	4	4	1	0	1	0	0
AC005225.2	ENSG00000258603	0	0	1	2	1	1	0	0	0	0	2	0	1	4	4	3	0	2	2	0	0	0	1	0	0	3	0	4	0	1	0	0	0	0	0	0
AC005225.3	ENSG00000258695	0	0	0	0	0	1	0	0	0	0	0	0	0	0	0	0	0	0	0	0	0	0	0	0	0	0	0	0	0	0	0	0	0	0	0	0
AC005229.4	ENSG00000273314	8	11	11	13	5	15	0	0	7	7	5	4	14	18	23	14	13	9	28	32	13	28	46	28	4	29	26	23	17	29	49	0	13	3	0	2
AC005232.1	ENSG00000285412	0	0	0	0	1	0	0	0	0	0	0	0	0	0	0	0	0	0	0	0	0	0	0	0	0	0	0	0	0	0	0	0	0	0	0	0
AC005237.1	ENSG00000225521	0	0	0	0	0	0	0	0	0	0	0	0	0	0	0	0	0	0	0	0	0	0	0	0	0	0	0	0	0	0	0	0	0	0	0	0
AC005244.2	ENSG00000265400	0	0	0	0	0	0	0	0	0	0	0	0	0	0	0	0	0	0	0	0	0	0	0	0	0	1	0	0	0	0	0	0	0	0	0	0
AC005253.1	ENSG00000268030	5	9	11	8	7	6	0	2	0	1	0	2	4	5	12	12	8	4	6	9	5	11	7	15	2	6	4	8	2	4	8	0	4	0	0	0
AC005253.2	ENSG00000268983	0	0	0	0	0	1	0	0	0	0	0	0	1	0	0	1	0	1	0	0	0	0	0	1	0	0	1	0	0	1	0	0	0	0	0	0
AC005256.1	ENSG00000267073	0	0	0	0	0	0	0	0	0	0	0	0	0	0	0	0	0	0	1	1	1	1	2	0	0	0	0	0	0	0	0	0	0	0	0	0
AC005261.1	ENSG00000268205	148	133	206	138	142	142	4	13	10	9	40	33	100	118	172	143	58	71	90	135	64	113	121	177	46	121	107	120	93	117	165	6	38	6	7	10
AC005261.2	ENSG00000268678	1	0	4	1	1	0	0	0	0	0	1	1	1	0	1	0	2	0	1	3	1	0	1	1	0	3	0	1	1	0	4	0	0	0	0	0
AC005261.3	ENSG00000268713	19	23	47	26	23	29	0	1	4	3	11	12	25	24	40	38	27	18	26	37	19	37	35	22	11	31	34	36	34	44	30	2	11	1	1	4
AC005264.1	ENSG00000267551	0	0	0	1	0	0	0	0	0	0	0	0	0	0	0	0	0	0	1	1	0	0	2	0	1	1	1	0	3	2	1	0	1	0	0	0
AC005280.1	ENSG00000251393	0	0	0	0	0	0	0	0	0	0	0	0	0	0	0	0	0	0	0	0	0	0	1	0	2	0	0	0	1	1	8	0	2	0	0	0
AC005280.2	ENSG00000284930	0	0	0	0	0	0	0	0	0	0	0	0	0	0	0	0	1	0	7	8	1	6	5	0	7	2	5	2	2	5	14	0	0	0	0	1
AC005280.3	ENSG00000285006	0	0	0	0	0	0	0	0	0	0	0	0	0	0	0	0	0	0	0	0	0	0	0	0	0	0	0	0	1	0	1	0	0	0	0	0
AC005288.1	ENSG00000266469	0	1	0	0	0	0	0	0	0	0	1	0	1	2	1	1	0	1	0	1	0	0	0	1	0	2	1	1	1	1	2	0	0	0	0	0
AC005291.1	ENSG00000264067	1	0	1	0	0	0	0	0	0	0	0	0	2	1	6	1	1	0	0	0	0	0	0	0	2	2	1	1	1	1	47	1	7	2	1	1
AC005291.2	ENSG00000273388	0	0	0	0	0	0	0	0	0	0	0	0	0	0	0	0	0	0	0	0	0	0	0	0	0	0	0	0	0	0	2	0	1	0	0	0
AC005304.1	ENSG00000233852	0	1	0	0	0	1	0	0	0	0	0	0	0	0	1	0	0	0	0	0	0	0	0	0	0	0	0	0	0	1	1	0	0	0	0	0
AC005304.2	ENSG00000265494	0	0	0	0	0	0	0	0	0	0	0	0	0	0	1	0	0	1	0	1	1	0	0	0	0	1	0	0	0	0	0	0	0	0	0	0
AC005304.3	ENSG00000266744	2	1	2	1	0	0	0	0	0	0	1	0	1	0	3	1	0	0	0	3	0	0	0	0	0	0	1	1	1	1	0	0	0	0	0	0
AC005306.1	ENSG00000267283	7	7	6	4	4	7	0	0	0	1	1	6	2	4	11	2	6	4	7	2	3	5	6	7	3	4	11	7	6	7	4	0	2	0	0	0
AC005307.1	ENSG00000260725	7	4	3	2	2	2	1	0	3	9	7	7	3	0	12	11	3	4	0	0	3	3	0	0	0	0	0	1	0	2	0	0	0	0	0	0
AC005323.1	ENSG00000214970	0	0	0	0	0	0	0	0	0	0	0	0	0	1	0	1	0	0	0	0	0	0	0	0	0	0	0	0	0	0	1	0	0	0	0	0
AC005323.2	ENSG00000272736	0	0	2	0	0	0	0	0	0	0	1	0	2	5	6	4	1	4	0	0	0	0	0	0	1	3	5	0	9	3	3	0	0	0	0	0
AC005324.1	ENSG00000233002	0	0	0	0	0	1	0	0	0	0	0	0	0	0	0	0	0	0	0	0	0	0	0	0	0	0	0	0	0	0	0	0	0	0	0	0
AC005324.3	ENSG00000251537	1	1	2	0	0	1	0	0	0	0	0	0	0	1	1	0	1	0	1	5	0	1	0	0	0	0	1	0	1	0	0	0	0	0	0	0
AC005324.4	ENSG00000255104	0	0	0	0	0	0	0	0	0	0	0	0	0	0	0	0	0	0	0	0	0	0	0	0	0	0	0	1	0	0	0	0	0	0	0	0
AC005329.1	ENSG00000248015	2	2	1	1	1	2	0	0	0	0	0	0	0	3	8	1	2	0	1	3	0	3	1	1	0	0	1	1	1	1	1	0	0	0	0	0
AC005329.2	ENSG00000267755	0	0	0	0	0	0	0	0	0	0	0	0	0	0	0	0	0	0	0	0	1	0	0	2	0	1	1	0	0	0	0	0	0	0	0	0
AC005329.3	ENSG00000280486	0	0	0	0	0	1	0	0	0	0	0	0	0	0	0	0	0	0	0	0	0	0	0	0	0	0	0	0	0	1	0	0	0	0	0	0
AC005332.1	ENSG00000265100	1	0	2	1	0	1	0	0	0	1	1	0	2	1	4	2	0	0	0	1	0	0	0	2	0	0	0	1	2	2	3	0	0	0	0	0
AC005332.3	ENSG00000267731	0	1	0	0	0	0	0	0	0	0	0	0	0	0	0	0	0	0	1	1	0	0	0	0	0	1	0	0	3	0	0	0	0	0	0	0
AC005332.4	ENSG00000274561	3	2	10	11	2	5	0	4	1	0	2	6	3	4	13	8	11	3	5	5	4	6	12	5	3	2	4	6	3	8	1	0	1	0	0	0
AC005332.5	ENSG00000274712	11	15	29	16	16	24	1	0	0	0	3	6	8	7	19	16	5	7	2	6	2	10	10	6	0	5	7	11	9	4	5	0	2	0	0	1
AC005332.6	ENSG00000277476	4	9	8	7	5	12	1	1	5	0	2	4	11	5	16	4	7	9	3	6	2	6	7	4	1	4	5	5	4	9	1	0	1	0	0	0
AC005332.7	ENSG00000278730	70	66	94	46	49	62	7	4	14	9	16	31	72	84	98	82	45	44	42	81	36	59	59	57	15	52	38	36	33	44	52	4	11	2	3	4
AC005332.8	ENSG00000278740	0	0	0	0	0	0	0	0	0	0	0	1	1	0	0	0	0	0	0	2	0	0	0	0	0	0	0	0	1	1	2	0	0	0	0	0
AC005339.1	ENSG00000268565	0	0	1	1	1	4	1	0	0	0	1	0	0	1	0	0	0	0	1	8	0	1	4	3	0	1	0	4	2	4	4	1	0	0	1	0
AC005342.1	ENSG00000203593	0	1	2	1	2	0	0	0	0	0	0	0	2	2	1	2	0	0	0	1	0	2	2	1	0	0	0	0	0	1	2	0	0	0	0	0
AC005355.1	ENSG00000250994	0	0	0	0	0	0	0	0	0	0	0	0	0	0	0	0	0	0	0	0	0	0	0	0	0	2	1	0	0	0	0	0	0	0	0	0
AC005358.2	ENSG00000265489	0	0	0	0	0	0	0	1	0	0	0	0	1	0	2	0	0	0	0	0	0	1	1	0	0	1	0	0	0	0	0	0	0	0	0	0
AC005363.2	ENSG00000277602	3	0	0	2	3	0	0	0	0	1	0	1	0	2	2	2	2	0	2	1	1	2	1	4	1	3	1	1	0	0	2	0	1	0	0	0
AC005383.1	ENSG00000275024	3	3	3	1	1	9	0	0	0	0	0	0	1	1	0	0	0	0	0	0	0	0	0	0	0	0	0	0	0	0	0	0	0	0	0	0
AC005393.1	ENSG00000276445	1	2	1	5	0	3	0	1	0	1	0	0	5	7	5	4	2	2	0	0	1	1	0	1	1	0	0	0	1	0	1	0	0	0	0	0
AC005394.1	ENSG00000266893	0	1	0	1	0	0	0	0	0	0	0	0	0	0	0	0	0	0	0	0	0	0	0	2	0	0	0	0	0	0	1	0	0	0	0	0
AC005394.2	ENSG00000283403	7	2	6	2	1	2	0	3	0	0	0	0	1	0	1	1	5	2	1	0	3	2	4	1	0	1	1	1	0	0	0	0	0	0	0	0
AC005410.2	ENSG00000266368	0	0	0	0	0	0	0	0	0	0	0	0	0	0	0	1	0	0	0	0	0	0	0	0	0	1	0	0	1	0	0	0	0	0	0	0
AC005476.2	ENSG00000259146	1	0	2	0	1	1	0	1	0	0	0	0	0	0	0	1	1	0	14	18	1	3	14	3	9	13	15	16	20	32	27	1	1	0	0	0
AC005479.2	ENSG00000270000	0	2	1	0	1	2	0	0	0	0	0	0	0	0	0	0	0	0	0	0	0	0	0	0	0	0	0	0	0	0	0	0	0	0	0	0
AC005480.1	ENSG00000258891	0	2	0	1	1	2	0	0	0	0	0	0	3	0	4	1	1	3	2	2	1	2	1	2	0	2	1	3	0	1	0	0	0	0	0	0
AC005481.1	ENSG00000222012	4	2	0	0	0	0	0	0	0	0	0	1	0	0	0	0	0	0	1	0	0	0	0	0	0	0	0	0	0	0	0	0	0	0	0	0
AC005486.1	ENSG00000243018	0	0	0	0	0	0	0	0	0	0	0	0	0	1	1	0	0	0	0	0	0	0	0	0	0	0	0	0	0	0	0	0	0	0	0	0
AC005487.1	ENSG00000225647	0	0	0	0	0	0	0	0	0	0	0	0	0	0	1	0	0	0	0	0	0	0	0	0	0	0	0	0	0	0	0	0	0	0	0	0
AC005498.1	ENSG00000267224	1	0	0	0	0	0	0	0	0	0	0	0	0	0	0	0	0	0	0	0	0	0	0	0	0	0	0	0	0	0	0	0	0	0	0	0
AC005498.2	ENSG00000267421	3	1	5	2	2	2	0	0	0	0	1	1	3	3	4	3	1	2	1	6	3	6	6	3	5	9	8	7	11	4	6	0	3	0	0	0
AC005498.3	ENSG00000269696	8	3	6	4	4	1	0	0	0	0	1	1	6	5	8	1	0	2	0	2	2	2	3	3	1	1	4	0	3	1	6	0	0	0	0	0
AC005520.1	ENSG00000258653	0	1	1	0	0	0	0	0	0	0	0	0	0	2	0	0	0	0	1	0	0	0	0	0	1	0	0	0	1	1	0	0	1	0	0	0
AC005520.2	ENSG00000259065	8	2	16	6	7	5	0	1	1	1	2	4	9	11	25	6	5	2	3	4	3	4	6	7	0	5	12	2	4	8	7	0	4	0	0	0
AC005520.5	ENSG00000273711	0	1	0	0	0	0	0	0	0	0	0	0	0	0	1	0	1	0	0	0	0	0	0	1	0	0	0	0	0	0	0	0	0	0	0	0
AC005523.1	ENSG00000268536	1	0	2	1	0	1	0	0	0	0	0	0	0	0	0	0	0	0	3	2	2	0	1	3	2	2	1	2	2	0	4	0	0	0	0	0
AC005523.2	ENSG00000269604	36	33	45	31	37	44	0	1	2	3	2	7	35	31	54	30	13	20	35	44	21	39	50	60	9	17	17	28	10	17	25	3	5	2	0	3
AC005532.1	ENSG00000230825	0	1	1	1	0	0	0	0	0	0	0	0	1	0	1	0	0	0	1	4	0	0	0	1	3	3	0	1	2	5	7	0	1	0	0	0
AC005534.1	ENSG00000224903	1	0	1	1	0	3	0	0	0	0	0	0	1	1	1	0	0	0	1	2	0	1	1	0	0	1	1	0	0	0	2	0	1	0	0	0
AC005537.1	ENSG00000232006	2	2	1	0	0	1	0	0	0	0	1	1	1	2	2	0	0	0	0	0	0	0	0	3	0	0	0	0	0	0	0	0	0	0	0	0
AC005540.1	ENSG00000235852	0	1	2	0	0	1	0	0	0	0	0	0	0	1	0	0	0	0	0	0	0	1	0	0	0	1	2	0	1	3	3	0	0	0	0	0
AC005546.1	ENSG00000266897	1	2	0	0	0	1	0	0	0	0	0	0	0	0	0	0	0	0	0	1	0	0	1	1	0	0	0	0	0	1	0	0	0	0	0	0
AC005550.2	ENSG00000237070	0	0	0	0	0	0	0	0	0	0	0	0	0	0	0	0	0	0	0	0	0	0	0	0	0	0	0	0	0	0	2	0	0	1	0	1
AC005552.1	ENSG00000264174	0	0	0	0	0	0	0	0	0	0	0	0	0	0	0	0	0	0	0	0	0	0	0	0	1	0	0	0	0	0	0	0	0	0	0	0
AC005562.1	ENSG00000214719	93	75	135	75	65	80	1	4	7	6	22	35	81	72	144	104	55	42	110	138	67	107	146	155	42	149	126	128	94	157	206	8	44	8	7	13
AC005592.1	ENSG00000261757	0	0	0	0	0	0	0	0	0	0	0	0	1	2	0	1	0	0	0	0	0	0	0	0	0	0	0	0	0	2	0	0	0	0	0	0
AC005606.1	ENSG00000260107	0	0	0	0	0	0	0	0	0	0	0	0	0	0	0	0	0	0	1	0	0	0	0	0	0	0	0	0	0	0	0	0	0	0	0	0
AC005606.2	ENSG00000261790	0	0	0	0	0	0	0	0	0	0	0	0	0	0	0	0	0	0	1	0	0	0	0	0	0	0	0	0	0	0	0	0	0	0	0	0
AC005609.1	ENSG00000278901	0	0	1	0	0	0	0	0	0	0	0	0	0	0	0	0	0	0	0	0	0	0	0	0	0	0	0	0	0	0	0	0	0	0	0	0
AC005609.3	ENSG00000278915	1	0	0	0	1	1	0	0	0	0	0	0	2	0	0	1	2	0	0	0	0	0	0	0	0	0	0	0	0	0	0	0	0	0	0	0
AC005609.4	ENSG00000278946	1	1	0	0	1	0	0	0	0	0	1	0	1	0	2	2	0	0	0	0	0	0	0	0	0	0	0	0	0	0	0	0	0	0	0	0
AC005609.5	ENSG00000279726	1	0	0	2	2	0	0	0	0	0	0	0	0	0	0	0	0	0	0	0	0	0	0	0	0	0	0	0	0	0	0	0	0	0	0	0
AC005614.1	ENSG00000269296	3	3	5	4	1	2	0	0	0	1	0	0	1	0	3	0	0	0	0	3	0	0	2	1	0	0	1	0	1	2	0	0	1	0	0	0
AC005616.1	ENSG00000267423	0	0	2	0	0	2	0	0	0	0	1	0	2	1	4	4	0	0	1	1	0	0	0	2	0	0	0	0	0	0	0	0	0	0	0	0
AC005618.1	ENSG00000272070	3	5	3	2	1	0	0	0	2	0	0	0	6	5	5	6	2	0	3	6	0	2	1	0	3	3	1	2	1	2	0	0	0	0	0	0
AC005632.4	ENSG00000273956	0	0	0	0	0	0	0	0	0	0	0	0	0	0	0	0	0	0	0	1	0	0	0	0	0	0	0	0	0	0	0	0	0	0	0	0
AC005670.1	ENSG00000261886	0	2	1	0	0	3	0	1	0	0	0	0	0	3	3	2	1	1	1	7	0	2	4	3	1	0	2	1	3	2	2	0	0	0	0	1
AC005670.2	ENSG00000262633	5	0	2	0	1	8	0	0	0	0	0	3	0	1	1	0	0	1	3	1	0	4	1	10	1	1	0	1	0	6	2	0	0	0	0	0
AC005695.3	ENSG00000273816	2	1	3	0	0	1	0	0	0	0	0	0	1	1	0	0	1	0	1	1	0	1	1	0	0	1	0	0	0	0	1	0	0	0	0	0
AC005696.1	ENSG00000262050	1	1	0	0	1	1	0	0	0	0	0	0	1	0	0	1	0	1	0	0	0	0	0	0	1	1	3	0	0	0	4	0	0	0	0	0
AC005696.2	ENSG00000272770	1	0	0	1	0	0	0	0	0	0	0	0	1	0	2	1	0	0	0	0	0	0	2	2	0	1	0	0	0	0	1	1	0	0	0	0
AC005696.4	ENSG00000277200	0	1	1	1	3	0	0	0	0	0	0	1	0	0	2	0	0	0	1	3	1	0	0	1	2	0	0	0	0	0	1	0	1	0	0	0
AC005697.2	ENSG00000266527	0	0	0	0	1	0	0	0	0	1	0	2	3	2	0	2	2	1	0	2	0	2	0	0	0	1	2	1	1	2	3	0	0	0	0	0
AC005699.1	ENSG00000249631	0	0	0	0	0	1	0	0	0	0	0	0	0	0	0	0	0	0	0	1	0	0	0	0	0	0	0	0	0	0	0	0	0	0	0	0
AC005702.1	ENSG00000267318	0	0	0	0	0	0	0	0	0	0	0	0	0	0	0	0	0	0	0	0	0	0	0	1	0	0	0	0	0	0	0	0	0	0	0	0
AC005703.3	ENSG00000265445	0	0	0	0	0	0	0	0	0	0	0	0	0	0	0	0	0	0	0	0	0	0	0	0	0	0	0	0	0	0	0	0	0	0	0	0
AC005703.4	ENSG00000266667	0	0	0	0	0	0	0	0	0	0	0	0	0	0	0	0	0	0	0	0	0	0	0	0	0	0	0	0	0	0	0	0	0	0	0	1
AC005725.1	ENSG00000264727	1	0	0	0	0	0	0	0	0	0	0	0	0	0	0	0	0	0	0	0	0	0	0	0	0	0	0	0	0	0	0	0	0	0	0	0
AC005726.1	ENSG00000258472	52	42	56	34	34	36	1	2	3	2	2	11	31	25	33	24	16	16	28	31	12	24	24	33	11	26	16	22	17	29	26	0	11	1	2	3
AC005726.2	ENSG00000264044	0	0	0	0	0	0	0	0	0	0	0	0	0	0	0	0	0	0	1	1	0	0	0	0	0	0	0	0	0	0	0	0	0	0	0	0
AC005726.4	ENSG00000265168	1	0	0	0	0	0	0	0	0	0	0	0	0	0	1	0	0	0	0	1	1	0	0	1	0	0	0	0	0	0	0	0	0	0	0	0
AC005726.5	ENSG00000265287	14	16	20	15	9	19	3	1	0	4	4	3	17	21	37	24	13	17	7	5	3	8	7	6	2	18	13	16	9	8	9	0	2	1	0	2
AC005730.2	ENSG00000261033	1	1	1	1	0	0	0	0	0	0	0	1	0	0	0	2	0	0	0	1	0	0	0	0	0	0	1	0	0	0	0	0	0	0	0	0
AC005740.4	ENSG00000271871	0	0	1	0	1	0	0	0	0	0	0	0	0	0	0	1	0	0	0	0	0	0	0	1	0	0	0	0	0	0	0	0	0	0	0	0
AC005746.2	ENSG00000267131	0	0	0	0	0	0	0	0	0	0	0	0	0	0	0	0	0	0	0	0	0	0	0	0	0	2	0	0	0	1	3	0	0	0	0	0
AC005746.3	ENSG00000273982	0	0	0	0	0	0	0	0	0	0	0	0	0	0	0	0	0	0	0	0	0	0	0	0	0	0	0	0	0	0	1	0	0	0	0	0
AC005757.1	ENSG00000267044	0	0	0	0	0	2	0	0	0	0	0	0	0	0	1	0	1	0	1	0	0	0	0	0	0	0	2	0	0	0	0	0	0	0	0	0
AC005759.1	ENSG00000268650	3	1	2	0	0	1	0	0	0	0	0	0	3	6	8	2	3	2	0	2	2	0	2	1	0	0	0	0	1	4	1	0	0	0	0	1
AC005775.1	ENSG00000266933	0	0	2	1	0	2	0	0	0	0	0	1	0	0	0	0	1	0	1	0	0	0	0	2	0	0	0	1	1	0	0	0	0	0	0	0
AC005776.2	ENSG00000273218	0	1	2	0	0	0	0	0	0	0	0	0	2	0	1	0	0	0	0	1	0	2	0	1	0	0	0	0	0	1	0	0	0	0	0	0
AC005779.1	ENSG00000266958	0	0	0	0	0	0	0	0	0	0	0	0	0	0	0	0	0	0	0	0	0	0	0	0	0	0	0	0	0	0	1	0	0	0	0	0
AC005785.1	ENSG00000268189	2	3	0	0	2	6	1	0	1	0	2	0	2	2	1	0	0	0	2	1	0	3	3	3	0	0	2	2	1	3	3	0	0	0	0	0
AC005786.2	ENSG00000267231	1	0	2	2	0	1	0	0	0	0	0	0	0	0	0	0	0	0	0	1	0	0	0	1	0	1	0	0	0	0	0	0	0	0	0	0
AC005786.3	ENSG00000267436	1	0	0	0	0	1	0	0	0	0	0	0	0	0	0	0	0	0	0	0	1	0	0	0	1	0	1	0	0	0	0	0	0	0	0	0
AC005790.1	ENSG00000274447	9	4	4	2	3	5	1	0	1	0	2	3	2	3	4	1	1	1	0	2	0	1	1	2	1	3	0	0	1	1	2	0	0	0	1	1
AC005821.1	ENSG00000265702	0	0	1	0	0	0	0	0	0	0	1	0	0	0	0	0	0	0	0	0	0	0	0	1	0	0	0	0	0	0	0	0	0	0	0	0
AC005828.2	ENSG00000263501	0	0	0	0	0	0	0	0	0	0	0	0	0	0	0	0	0	0	0	0	0	1	0	0	0	0	0	0	0	0	0	0	0	0	0	0
AC005828.3	ENSG00000263644	0	0	1	0	0	0	0	0	0	0	0	0	0	0	0	0	0	0	0	0	0	0	0	0	0	0	0	1	0	0	0	0	0	0	0	0
AC005828.5	ENSG00000265971	0	0	1	0	1	0	0	0	0	0	0	0	0	0	0	0	0	0	0	0	0	0	0	0	0	0	0	0	0	0	0	0	0	0	0	0
AC005832.4	ENSG00000272921	0	0	0	0	0	0	0	0	0	0	0	0	0	0	0	1	0	0	0	0	0	0	0	0	0	0	0	0	0	0	0	0	0	0	0	0
AC005833.1	ENSG00000255474	0	0	0	0	0	0	0	0	0	0	0	0	0	0	0	0	0	0	1	0	1	0	0	0	0	0	0	0	0	0	0	0	0	0	0	0
AC005837.1	ENSG00000261335	7	4	5	6	1	4	0	1	0	1	0	1	3	11	9	6	2	4	3	8	4	12	13	4	3	5	7	5	3	1	5	0	1	0	1	0
AC005837.3	ENSG00000277382	2	7	3	6	4	5	1	0	2	0	3	2	5	1	10	7	1	5	5	5	3	3	1	6	4	10	7	4	6	2	1	2	3	0	0	0
AC005838.2	ENSG00000266538	51	40	71	37	30	47	4	6	6	6	13	19	45	57	103	73	27	26	25	44	22	27	19	22	8	30	26	20	25	24	38	2	6	3	2	6
AC005840.2	ENSG00000256433	0	0	0	1	0	2	0	0	0	0	0	2	2	2	3	1	1	1	0	0	1	0	1	0	1	7	5	3	2	3	2	0	2	0	0	0
AC005840.4	ENSG00000276718	1	0	0	0	0	0	0	0	0	0	0	0	0	0	1	0	0	0	0	1	0	0	0	0	0	0	0	1	0	2	0	0	0	0	0	0
AC005841.1	ENSG00000258092	0	0	0	0	0	1	0	0	0	0	0	0	0	0	0	0	0	0	0	0	0	0	0	0	0	1	0	0	0	0	0	0	0	0	0	0
AC005845.1	ENSG00000255775	0	0	0	0	0	0	0	0	0	0	0	0	0	0	0	0	0	0	0	0	0	0	0	1	0	0	0	0	0	0	0	0	0	0	0	0
AC005865.1	ENSG00000236908	0	0	0	0	0	0	0	0	0	0	0	0	3	0	1	1	0	0	0	1	0	0	0	0	0	1	2	0	2	2	0	0	2	0	0	0
AC005884.1	ENSG00000267207	0	0	0	0	0	0	0	0	0	0	0	0	0	0	0	0	0	0	0	0	0	0	0	0	0	0	1	0	0	1	0	0	0	0	0	0
AC005899.1	ENSG00000264083	0	0	0	0	0	0	0	0	0	0	0	0	0	0	0	0	1	0	0	0	0	0	0	0	0	0	0	0	1	0	1	0	0	0	0	0
AC005899.5	ENSG00000266385	1	0	5	0	4	2	0	0	2	1	1	0	5	1	8	7	6	0	3	2	4	6	0	3	2	13	3	7	7	7	3	0	0	0	0	1
AC005899.6	ENSG00000274341	1	1	1	3	2	2	0	1	0	1	4	4	2	6	2	6	4	3	2	11	1	3	4	1	1	2	5	2	2	4	2	0	0	0	1	0
AC005899.7	ENSG00000278668	2	0	2	2	0	3	1	1	0	2	2	3	1	4	1	6	3	1	3	5	1	2	7	6	2	5	5	4	9	5	5	0	1	0	0	2
AC005899.8	ENSG00000279762	1	1	4	4	1	0	0	0	0	0	0	0	0	1	2	0	1	0	1	2	0	3	5	4	0	5	3	3	0	1	3	0	0	0	0	2
AC005906.2	ENSG00000256654	0	0	0	0	1	0	0	0	0	0	0	1	0	1	0	0	0	0	0	0	0	0	0	0	0	0	1	0	0	0	0	0	0	0	0	0
AC005909.1	ENSG00000265425	0	0	0	0	0	0	0	0	0	0	0	0	2	0	1	0	0	0	0	0	0	2	0	0	0	0	0	0	0	0	0	0	0	0	0	0
AC005920.1	ENSG00000247011	0	0	2	1	3	1	0	0	0	0	0	0	1	0	0	1	0	0	0	0	0	0	1	0	0	0	1	0	1	2	0	0	1	0	0	0
AC005921.2	ENSG00000262967	63	77	80	78	71	88	5	3	4	3	28	28	79	94	94	79	54	47	117	179	85	118	194	230	44	90	74	85	80	143	111	5	21	4	5	16
AC005944.1	ENSG00000267469	1	0	1	1	1	3	0	1	0	0	0	0	2	4	4	2	3	2	4	1	2	3	2	6	1	2	2	0	1	5	3	0	0	0	0	0
AC005954.2	ENSG00000267205	0	0	2	1	0	0	0	0	0	0	0	0	0	0	0	2	0	1	0	1	0	0	0	0	0	1	2	0	1	0	1	0	0	0	0	0
AC005962.1	ENSG00000278627	1	1	0	1	0	2	0	0	1	0	2	0	1	0	2	0	0	0	1	0	0	0	0	0	0	1	0	1	2	0	0	0	0	0	0	0
AC005972.1	ENSG00000266411	0	0	0	0	0	0	0	0	0	0	0	0	0	0	0	0	1	0	2	0	0	0	1	0	0	0	0	0	1	1	0	0	0	0	0	0
AC005972.4	ENSG00000283538	0	0	0	0	0	0	0	0	0	0	0	0	0	0	0	1	0	0	0	0	0	0	0	0	0	0	0	0	0	1	0	0	0	0	0	0
AC005993.1	ENSG00000266869	0	0	0	0	0	0	0	0	0	0	0	0	0	0	0	0	0	0	0	0	0	0	0	0	0	0	0	0	0	0	0	0	0	0	0	0
AC005996.1	ENSG00000241456	1	0	0	0	0	0	0	0	0	0	0	0	0	0	0	0	0	0	0	0	0	0	0	0	0	0	0	0	0	0	0	0	0	0	0	0
AC006004.1	ENSG00000236795	0	0	0	0	0	0	0	0	0	0	0	0	0	0	0	0	0	0	0	0	0	0	0	0	0	0	0	0	0	0	0	0	0	0	0	0
AC006012.1	ENSG00000234215	0	1	0	0	0	0	0	0	0	0	0	1	0	0	1	0	0	0	0	0	0	0	1	1	0	0	0	1	0	2	0	0	0	0	0	0
AC006017.1	ENSG00000229591	0	1	3	1	0	0	1	0	0	0	2	1	1	4	2	0	0	0	0	1	0	0	2	0	0	1	1	1	1	1	1	0	1	0	0	0
AC006027.1	ENSG00000272638	0	2	1	0	0	1	0	0	0	0	0	1	0	1	1	0	0	0	2	2	0	2	2	2	1	2	1	3	4	4	0	1	0	0	0	0
AC006030.1	ENSG00000264324	0	0	0	0	0	0	0	0	0	0	0	0	0	0	2	0	0	0	0	0	0	0	0	1	0	0	0	0	0	0	0	0	0	0	0	0
AC006033.2	ENSG00000272908	0	0	0	0	0	0	0	0	0	0	0	0	0	0	0	0	0	0	0	1	0	1	1	0	0	2	0	0	1	0	7	0	1	1	0	2
AC006042.1	ENSG00000227719	0	0	0	0	0	0	0	0	0	0	0	0	0	0	0	0	0	0	1	0	0	0	0	0	0	0	0	0	0	0	0	0	0	0	0	0
AC006042.2	ENSG00000233108	0	0	0	0	0	0	0	0	0	0	0	0	0	0	0	0	0	0	0	0	0	0	0	0	0	1	0	0	0	0	0	0	0	0	0	0
AC006042.4	ENSG00000234141	2	0	0	0	1	0	0	0	0	0	0	0	0	0	1	0	0	0	0	1	0	0	4	1	0	0	0	1	1	0	0	0	0	0	0	0
AC006058.1	ENSG00000261786	3	10	21	16	10	8	0	2	3	1	9	4	38	71	60	59	24	24	36	233	45	70	47	45	51	171	88	163	21	84	247	43	131	37	8	23
AC006058.2	ENSG00000271192	0	0	0	0	0	0	0	0	0	0	0	0	0	0	0	0	0	0	0	0	0	1	1	0	0	1	1	1	1	1	0	0	1	0	0	0
AC006058.3	ENSG00000272121	3	11	15	13	11	4	0	2	1	2	5	2	9	13	17	12	7	4	7	27	13	20	11	9	6	17	19	22	6	21	41	0	14	1	1	2
AC006059.1	ENSG00000230084	4	3	2	1	4	3	0	0	1	5	3	0	18	28	31	40	10	13	8	15	6	3	12	6	0	6	4	2	5	8	8	0	2	0	0	1
AC006063.2	ENSG00000284513	0	0	0	0	0	0	0	0	0	0	0	2	0	0	0	0	0	0	0	0	0	0	0	0	0	0	0	0	0	0	0	0	0	0	0	0
AC006064.1	ENSG00000245667	0	0	0	0	0	1	0	0	0	0	0	0	0	1	1	2	1	0	2	0	1	1	0	0	0	0	0	1	1	0	0	0	0	0	0	0
AC006064.2	ENSG00000247853	0	1	4	3	3	2	0	0	1	0	0	0	1	1	2	1	1	1	2	2	3	0	1	2	0	1	3	4	0	1	1	0	0	0	0	0
AC006064.3	ENSG00000255966	1	0	0	0	0	0	0	0	0	0	0	0	0	0	1	1	0	0	0	0	0	0	0	1	0	0	0	0	0	0	1	0	0	0	0	0
AC006064.4	ENSG00000269968	21	32	49	37	32	31	0	0	2	4	3	6	13	14	21	16	14	15	66	106	32	80	67	77	22	51	43	33	26	32	49	2	12	2	3	4
AC006111.3	ENSG00000276754	0	0	0	0	0	0	0	0	0	0	0	0	0	0	0	0	0	0	0	0	0	0	0	0	1	0	0	0	0	0	0	0	0	0	0	0
AC006115.1	ENSG00000268352	0	0	0	0	0	0	0	0	0	0	0	0	0	0	1	0	0	1	0	0	0	0	0	0	0	0	0	0	0	0	0	0	0	0	0	0
AC006116.4	ENSG00000267192	0	0	0	0	1	0	0	0	0	0	0	0	0	0	0	0	0	0	0	0	0	0	0	0	0	0	0	0	0	0	1	0	0	0	0	0
AC006116.8	ENSG00000267549	2	0	0	1	0	1	0	0	1	0	0	1	1	1	1	1	1	0	0	0	0	1	0	0	2	1	1	0	1	2	2	0	0	0	0	0
AC006116.9	ENSG00000267606	0	0	0	0	0	0	0	0	0	0	0	0	0	0	0	0	0	0	1	0	0	0	0	0	0	0	0	1	0	0	1	0	0	0	0	0
AC006122.2	ENSG00000255920	8	7	14	11	15	8	1	0	0	2	4	4	9	19	21	16	5	8	5	5	0	1	4	8	0	0	0	0	0	0	0	0	2	1	0	0
AC006130.1	ENSG00000267063	0	0	0	0	0	0	0	0	0	0	0	0	0	0	0	0	0	0	0	1	0	0	0	0	0	0	0	0	0	0	0	0	0	0	0	0
AC006145.1	ENSG00000223770	1	0	1	0	0	0	0	0	0	0	0	0	1	0	0	0	0	0	0	0	0	0	0	0	0	0	0	0	0	0	0	0	0	0	0	0
AC006146.1	ENSG00000258660	0	0	0	0	0	0	0	0	0	0	0	0	0	0	0	0	0	0	1	0	0	0	0	1	1	0	0	0	0	0	1	0	0	0	0	0
AC006148.1	ENSG00000242593	0	0	0	0	0	0	0	0	0	0	0	0	1	1	0	0	0	0	0	0	0	0	0	0	0	0	0	0	0	0	0	0	0	0	0	0
AC006148.2	ENSG00000243574	0	0	0	0	0	0	0	0	0	0	0	0	0	0	0	0	0	0	0	0	0	0	0	0	0	0	0	0	0	0	0	0	0	0	0	0
AC006153.1	ENSG00000273299	0	0	0	0	0	0	0	0	0	0	0	0	0	0	0	0	0	0	0	0	0	0	1	0	0	0	0	0	0	1	0	0	0	0	0	0
AC006157.1	ENSG00000278847	1	0	7	2	0	1	0	0	0	0	0	0	4	0	5	7	1	2	0	0	0	1	2	4	2	0	1	1	2	4	6	0	2	1	0	0
AC006159.2	ENSG00000243220	0	0	0	0	1	1	0	0	0	0	0	0	0	0	0	0	0	0	5	1	1	2	2	3	1	1	0	0	0	1	2	0	0	0	0	0
AC006160.1	ENSG00000249502	0	1	0	0	0	0	0	0	0	0	0	0	2	0	2	1	2	1	0	2	0	1	0	1	2	1	1	1	1	3	0	0	0	1	0	0
AC006206.1	ENSG00000256146	3	6	1	0	0	0	0	0	0	0	0	0	0	5	0	0	0	0	0	8	0	0	0	0	0	1	2	1	1	4	0	0	0	0	0	0
AC006206.2	ENSG00000256417	0	0	0	0	0	0	0	0	0	0	0	0	2	5	0	0	0	0	0	3	0	0	0	0	0	0	0	0	0	0	0	0	0	0	0	0
AC006213.1	ENSG00000266921	4	3	5	3	4	2	1	0	0	0	2	2	4	3	8	8	6	2	3	7	0	3	1	2	2	3	4	5	6	7	7	0	0	0	1	1
AC006213.2	ENSG00000267058	10	4	13	6	7	3	1	0	1	1	1	1	6	6	4	5	2	3	7	14	2	4	3	6	7	5	7	11	3	12	13	1	3	0	1	1
AC006213.3	ENSG00000267191	0	0	0	0	1	0	0	0	0	0	1	0	0	0	0	0	0	3	1	1	0	0	0	0	0	0	0	1	1	0	1	0	0	0	0	0
AC006238.1	ENSG00000272799	0	1	1	0	0	1	0	0	0	0	0	0	0	0	0	0	0	0	0	0	0	1	1	1	0	0	0	2	2	1	0	0	0	0	0	0
AC006252.1	ENSG00000243224	4	2	1	2	1	3	0	0	1	0	0	1	2	2	0	1	2	2	4	3	1	5	4	8	1	3	2	1	0	3	7	1	2	0	0	0
AC006254.1	ENSG00000243696	1	0	1	0	0	0	0	0	0	0	0	1	7	2	9	8	2	2	0	0	0	0	0	0	1	0	0	0	1	0	0	0	0	0	0	0
AC006262.1	ENSG00000268460	1	0	0	0	0	0	0	0	0	0	0	0	0	0	0	0	0	0	1	0	0	2	3	0	0	1	0	0	1	1	0	0	0	0	0	0
AC006262.2	ENSG00000269729	0	0	0	0	0	0	0	0	0	0	0	0	0	0	0	0	0	0	17	22	6	26	17	18	9	20	16	6	5	25	11	0	1	0	0	0
AC006273.1	ENSG00000272473	0	0	2	0	1	1	0	0	0	0	0	1	0	4	4	3	1	0	1	0	0	1	2	0	0	0	0	1	2	0	2	0	0	0	0	0
AC006299.1	ENSG00000246225	0	0	0	3	0	0	0	0	0	1	0	0	1	0	0	0	0	0	0	0	0	0	0	0	1	1	0	2	1	0	0	0	0	0	0	0
AC006305.1	ENSG00000206129	0	1	1	0	0	0	0	0	0	0	0	1	0	3	0	1	0	0	2	2	0	4	1	0	1	3	2	1	2	4	9	0	0	0	1	0
AC006305.2	ENSG00000267399	0	0	0	0	0	0	0	0	0	0	0	0	0	0	0	0	0	0	0	0	0	0	0	0	0	0	0	0	0	0	1	0	1	0	0	0
AC006329.1	ENSG00000232445	76	71	101	94	42	79	0	4	1	1	5	0	6	10	6	10	9	2	13	29	12	26	35	53	4	1	4	11	0	4	13	2	2	0	0	0
AC006333.1	ENSG00000230442	0	0	0	0	0	0	0	0	0	0	0	0	0	0	0	0	0	0	0	0	0	0	0	0	0	0	0	0	0	0	0	0	0	0	0	0
AC006333.2	ENSG00000272686	42	28	40	29	21	21	2	3	5	4	2	14	57	74	64	49	20	17	13	37	11	23	32	29	10	17	26	22	22	16	39	0	12	3	0	3
AC006369.1	ENSG00000236213	0	0	0	0	1	0	0	0	0	0	0	0	0	0	0	0	0	0	0	0	0	0	0	0	0	0	0	0	0	0	0	0	0	0	0	0
AC006372.3	ENSG00000234210	0	0	0	0	0	0	0	0	0	0	0	0	0	0	0	0	0	0	0	1	0	0	0	0	0	0	0	0	0	1	0	0	0	0	0	0
AC006387.1	ENSG00000243193	0	1	1	0	2	1	1	0	0	0	0	2	2	1	0	0	0	0	0	2	1	1	0	0	0	1	0	0	0	0	0	0	1	0	0	0
AC006435.1	ENSG00000262456	0	0	0	0	0	0	0	0	0	0	0	0	0	0	0	0	1	0	0	0	0	0	0	0	0	0	0	0	0	0	0	0	0	0	0	0
AC006435.2	ENSG00000263345	0	0	0	0	1	0	0	0	0	0	0	0	0	0	0	0	0	0	0	0	0	0	0	0	0	0	0	0	0	0	0	0	0	0	0	0
AC006441.1	ENSG00000263466	0	2	0	1	1	0	0	0	0	0	0	0	1	2	1	1	0	0	1	1	0	1	2	1	0	1	0	0	0	1	0	0	0	0	1	0
AC006441.3	ENSG00000265784	0	0	0	0	0	0	0	0	0	0	0	0	0	0	0	1	0	0	0	0	0	1	1	0	0	1	0	0	0	0	0	0	0	0	0	0
AC006441.4	ENSG00000266588	0	0	0	0	0	0	0	0	0	0	0	0	0	0	0	1	0	0	0	0	0	0	0	0	0	0	0	0	0	0	0	0	0	0	0	0
AC006449.1	ENSG00000274996	1	0	0	0	0	0	0	0	0	0	0	0	0	0	0	0	0	0	0	0	0	0	0	0	0	0	0	0	0	0	0	0	0	0	0	0
AC006449.2	ENSG00000275532	0	1	3	1	1	0	0	0	2	1	0	2	0	0	2	2	0	0	1	3	4	7	2	3	2	13	7	13	12	4	5	1	0	0	0	1
AC006449.3	ENSG00000275665	0	0	0	0	0	0	0	0	0	0	0	1	0	0	0	0	0	0	0	0	0	0	0	0	0	1	1	0	0	0	1	0	0	0	0	0
AC006449.5	ENSG00000277182	0	2	3	2	0	1	0	1	0	1	0	1	0	1	0	0	0	0	1	0	2	0	1	1	0	2	1	1	0	2	0	1	0	0	0	0
AC006449.6	ENSG00000277969	0	2	10	4	2	6	0	1	1	0	0	4	6	6	8	8	4	6	7	10	1	8	7	12	8	18	11	16	9	12	18	0	1	2	1	2
AC006460.1	ENSG00000228509	0	0	0	0	0	0	0	0	0	0	0	0	2	1	2	2	2	0	1	0	0	0	0	0	0	0	1	1	2	0	0	0	0	0	0	0
AC006460.2	ENSG00000284052	1	2	0	0	1	1	1	1	0	0	0	0	2	3	4	7	4	1	5	2	1	4	4	3	0	3	2	0	2	4	2	1	0	2	0	0
AC006480.2	ENSG00000273448	17	13	24	20	6	14	1	1	1	3	2	5	13	9	22	19	5	5	10	28	8	14	12	14	12	5	19	20	13	18	16	0	3	0	1	0
AC006483.2	ENSG00000272719	0	0	1	1	0	1	0	0	0	0	1	2	1	0	1	2	0	0	1	0	0	0	1	2	1	1	0	0	0	1	4	0	0	0	0	0
AC006487.1	ENSG00000249906	0	0	0	0	0	0	0	0	0	0	0	0	0	0	0	1	0	0	0	0	0	0	0	0	0	0	0	0	0	0	0	0	0	0	0	0
AC006504.1	ENSG00000261770	14	9	23	16	16	15	1	1	0	2	2	4	12	10	13	15	6	9	8	13	5	6	12	6	4	6	11	6	1	11	4	0	3	0	0	0
AC006504.5	ENSG00000267575	35	19	40	39	41	37	0	1	5	7	13	18	26	24	42	42	25	24	28	55	19	41	55	51	10	42	51	56	25	53	58	3	19	2	1	5
AC006511.4	ENSG00000282080	0	0	0	1	0	0	0	0	0	0	0	0	0	0	0	0	0	0	0	0	0	0	0	0	0	0	0	0	0	0	0	0	0	0	0	0
AC006511.5	ENSG00000284697	0	1	0	0	0	2	0	0	1	0	0	0	1	0	0	0	0	1	0	1	0	0	2	0	2	1	0	0	0	0	1	0	0	0	0	0
AC006547.1	ENSG00000236540	1	1	2	0	2	0	0	0	0	0	0	0	0	0	1	1	2	0	2	0	0	1	1	1	0	0	0	0	0	0	1	0	0	0	0	0
AC006547.2	ENSG00000243762	2	0	2	0	0	1	0	0	0	0	0	0	1	1	1	1	0	0	0	0	2	1	3	0	1	0	0	1	0	1	1	1	1	0	0	0
AC006547.3	ENSG00000268292	1	4	0	1	1	3	0	0	0	0	0	0	1	0	3	1	0	0	5	2	0	5	2	1	0	1	2	0	0	1	3	0	1	0	0	0
AC006557.1	ENSG00000267150	1	0	0	0	0	0	0	0	0	0	0	0	0	0	0	0	0	0	0	0	0	1	0	0	0	0	0	1	0	0	0	0	0	0	0	0
AC006557.3	ENSG00000267356	1	1	0	0	0	0	0	0	0	0	0	0	0	0	0	0	0	0	0	0	0	0	1	0	0	0	0	0	0	0	1	0	0	0	0	0
AC006581.2	ENSG00000282022	0	0	0	0	0	1	0	0	0	0	0	0	0	0	0	0	0	0	0	0	1	0	0	0	0	1	0	0	0	0	1	0	0	0	0	0
AC006942.1	ENSG00000269194	3	0	1	1	2	3	0	0	0	0	2	3	1	0	1	0	1	0	1	3	2	0	3	4	0	3	3	3	3	3	2	0	1	0	0	1
AC006946.2	ENSG00000273203	0	0	0	0	0	0	0	0	0	0	0	0	0	0	0	0	0	0	0	0	0	0	0	0	1	0	0	0	1	6	4	0	1	1	0	0
AC006946.3	ENSG00000273442	0	0	0	0	0	0	0	0	0	0	0	0	0	0	0	0	0	0	0	1	0	0	0	0	0	2	0	0	2	0	1	0	0	0	0	0
AC006974.1	ENSG00000283504	0	0	0	0	0	0	0	0	0	0	0	0	0	0	1	1	0	0	0	0	0	0	0	0	0	0	0	0	0	0	0	0	0	0	0	0
AC006974.2	ENSG00000283648	0	0	3	0	0	0	0	0	0	0	0	0	1	1	0	1	0	0	0	0	0	0	0	0	0	0	0	0	0	0	0	0	0	0	0	0
AC006978.2	ENSG00000281593	0	0	0	0	0	0	0	0	0	0	0	0	0	1	0	0	0	0	0	0	0	0	0	0	0	0	0	0	0	0	0	0	0	0	0	0
AC006994.2	ENSG00000279317	0	1	1	4	0	1	0	1	0	0	0	0	2	1	2	3	1	0	0	1	2	1	0	0	0	4	2	0	1	1	0	0	0	0	0	0
AC007000.3	ENSG00000259628	0	1	0	0	0	0	0	0	0	0	0	0	0	0	0	1	0	0	0	0	0	0	0	0	0	0	0	0	0	1	1	0	0	0	0	0
AC007014.1	ENSG00000262020	8	7	10	7	5	7	1	1	0	0	1	1	7	8	12	6	6	3	9	5	0	13	9	10	1	4	9	8	5	3	4	1	1	0	0	1
AC007029.1	ENSG00000271185	0	0	0	0	0	0	0	0	0	0	0	1	0	1	0	0	0	0	0	1	0	0	0	0	0	0	0	0	0	0	0	0	0	0	0	0
AC007032.1	ENSG00000273320	7	4	14	10	4	12	1	1	0	0	0	0	6	3	8	13	0	2	5	6	3	7	5	5	3	3	4	5	6	5	7	0	0	0	0	1
AC007036.1	ENSG00000227017	0	0	0	0	0	0	0	0	0	0	0	0	1	2	0	0	0	0	0	0	0	0	1	0	0	0	0	1	1	0	0	0	0	0	0	0
AC007038.1	ENSG00000229127	5	7	19	8	6	6	1	0	1	0	3	0	6	2	8	14	5	0	7	8	6	12	8	11	1	10	9	11	6	10	9	1	0	1	0	0
AC007038.2	ENSG00000272807	17	17	17	20	9	7	1	0	3	3	1	5	12	20	33	18	11	13	7	18	5	8	16	17	5	16	17	11	6	19	17	1	2	1	1	0
AC007040.2	ENSG00000258881	2	6	3	5	3	6	0	0	0	0	1	2	3	0	0	0	0	0	3	9	5	1	15	6	0	3	1	0	0	6	1	0	1	1	0	0
AC007064.2	ENSG00000237689	1	0	2	0	2	1	0	0	0	0	1	0	0	0	1	1	2	0	0	0	1	2	5	1	1	0	0	0	0	2	1	0	1	0	0	0
AC007091.1	ENSG00000223838	0	0	1	0	0	0	0	0	0	0	0	0	0	0	0	0	0	0	0	0	0	0	0	0	0	0	0	0	0	0	0	0	0	0	0	0
AC007099.1	ENSG00000231172	0	0	0	0	0	0	0	0	0	0	0	0	0	0	0	0	0	0	0	0	0	0	0	0	0	1	0	0	0	1	0	0	1	0	0	0
AC007114.1	ENSG00000263004	7	4	15	8	10	8	0	0	1	1	4	4	10	5	17	7	7	6	6	24	6	7	6	4	5	5	8	9	8	10	13	0	1	0	0	1
AC007114.2	ENSG00000263089	21	16	18	15	9	9	0	1	1	0	1	6	13	16	16	12	3	3	13	17	4	11	13	21	2	12	12	11	5	5	5	1	3	0	0	2
AC007126.1	ENSG00000250497	0	0	0	0	0	1	0	0	0	0	0	0	0	0	0	0	0	0	0	0	0	0	0	0	0	0	0	0	1	0	0	0	0	0	0	0
AC007159.1	ENSG00000261146	0	0	0	1	0	0	0	0	0	0	0	0	0	0	0	0	0	0	0	0	0	0	0	0	0	0	0	0	0	0	0	0	0	0	0	0
AC007161.3	ENSG00000283549	0	0	0	0	0	0	0	0	0	0	0	0	0	0	0	0	0	0	0	0	0	0	0	1	0	0	1	0	0	1	1	0	0	0	0	0
AC007163.1	ENSG00000230408	0	0	0	0	0	0	0	0	0	0	0	0	0	0	0	0	0	0	0	0	0	0	0	0	0	0	0	1	0	0	0	0	1	0	0	0
AC007182.1	ENSG00000224721	0	0	0	0	1	0	0	0	0	0	0	0	1	1	1	2	0	1	0	0	0	0	0	0	0	0	0	0	0	0	1	0	0	0	0	0
AC007192.2	ENSG00000269145	0	0	0	0	0	0	0	0	0	0	0	0	0	0	0	0	0	0	0	0	0	0	0	0	0	0	0	0	0	0	1	0	0	0	1	0
AC007193.1	ENSG00000268810	4	3	2	3	1	0	0	0	0	0	0	0	1	1	4	1	1	1	2	6	0	7	1	3	1	0	1	1	1	0	1	0	0	0	0	0
AC007193.2	ENSG00000269124	1	0	0	0	1	0	0	0	0	0	0	0	0	0	0	0	0	0	0	0	0	0	0	0	0	0	0	0	0	0	0	0	0	0	0	0
AC007207.2	ENSG00000256969	2	1	4	1	1	2	0	0	0	0	0	0	0	0	0	0	0	0	0	0	0	0	0	0	0	0	0	0	0	0	0	0	0	0	0	0
AC007216.1	ENSG00000260488	0	0	0	0	0	0	0	0	0	0	0	0	0	0	0	0	0	0	0	0	0	0	0	2	0	0	0	0	1	1	0	0	1	0	0	0
AC007216.2	ENSG00000261216	0	1	1	1	0	0	0	0	0	0	0	0	0	1	3	0	1	0	1	0	4	2	0	1	0	0	3	0	0	1	1	0	1	0	0	0
AC007216.4	ENSG00000263307	0	1	0	1	2	1	0	0	0	1	0	0	0	0	1	1	0	1	3	1	1	0	2	2	0	1	1	0	0	1	2	0	0	0	0	0
AC007220.1	ENSG00000263033	0	1	2	0	1	1	0	0	0	0	0	0	1	1	1	2	0	1	0	0	0	0	0	0	0	0	0	0	0	0	0	0	0	0	0	0
AC007228.2	ENSG00000268568	1	3	8	8	1	6	0	0	0	0	1	4	4	0	1	2	1	2	0	6	0	6	14	7	0	9	1	4	4	8	0	0	2	0	0	1
AC007240.1	ENSG00000284681	17	12	10	8	1	9	1	1	0	0	0	3	2	17	6	7	5	8	13	23	8	14	16	22	11	29	20	40	14	24	14	1	6	3	0	0
AC007249.2	ENSG00000257135	2	5	2	2	1	5	1	0	0	0	0	1	3	2	2	1	0	1	0	2	0	2	2	4	4	0	0	2	3	1	14	0	2	0	2	2
AC007250.1	ENSG00000273063	3	5	7	6	0	3	0	0	0	0	1	4	2	5	1	3	3	0	2	2	3	2	1	5	0	3	2	1	1	5	4	1	0	0	0	0
AC007255.1	ENSG00000223813	1	0	0	1	0	0	1	1	0	0	0	0	0	1	1	0	0	1	0	2	0	0	0	0	0	0	0	0	0	1	0	0	0	0	0	0
AC007262.2	ENSG00000284959	2	4	3	4	2	8	0	0	0	0	0	1	1	1	4	5	1	1	2	3	1	3	0	1	0	2	0	2	5	4	2	0	0	0	0	0
AC007272.1	ENSG00000232719	0	0	0	0	0	0	0	0	0	0	0	0	0	0	0	0	0	0	0	0	0	1	0	0	0	0	0	0	1	0	1	0	0	0	0	0
AC007277.1	ENSG00000213981	4	3	4	2	0	4	0	0	0	0	0	0	1	0	4	0	2	0	0	0	1	0	0	0	0	0	0	0	0	0	0	0	0	0	0	0
AC007285.1	ENSG00000227014	2	1	2	0	2	1	0	0	0	0	1	0	1	0	0	0	1	0	0	5	0	0	2	0	0	1	1	0	1	0	0	0	0	0	0	0
AC007285.2	ENSG00000231519	1	0	0	0	0	0	0	0	0	0	0	0	0	0	0	0	0	0	0	0	0	0	0	0	0	0	0	0	0	0	0	0	0	0	0	0
AC007292.1	ENSG00000267980	2	4	1	7	3	5	0	0	0	0	0	1	2	2	1	2	3	1	3	1	0	2	1	3	0	4	0	1	0	0	0	0	0	0	0	0
AC007292.2	ENSG00000269318	1	3	7	3	5	6	1	0	1	0	0	1	5	9	3	2	4	3	3	5	2	8	8	3	3	4	4	3	2	3	9	0	2	0	0	0
AC007292.3	ENSG00000269807	1	0	2	0	2	3	0	0	0	1	0	1	2	0	1	0	0	0	0	1	0	0	2	0	0	1	1	0	0	2	4	0	0	0	0	0
AC007298.1	ENSG00000257715	0	0	0	0	0	0	0	0	0	0	0	0	0	0	1	0	0	0	0	2	0	0	0	0	0	0	0	0	0	0	0	0	0	0	0	0
AC007298.2	ENSG00000257878	0	0	0	0	0	0	0	0	0	0	0	0	0	0	0	0	0	0	0	0	0	0	0	0	0	0	0	0	0	1	0	0	0	0	0	0
AC007308.1	ENSG00000272600	0	0	0	0	0	0	0	0	0	0	0	0	1	0	0	0	0	0	0	0	0	0	0	0	0	0	0	0	0	0	0	0	0	0	0	0
AC007314.1	ENSG00000234818	0	0	0	0	0	0	0	0	0	0	0	0	0	0	0	0	0	0	0	0	0	0	0	0	0	0	0	0	0	0	0	0	0	0	0	0
AC007319.1	ENSG00000224063	0	1	0	0	0	0	0	0	0	0	0	2	1	1	1	0	1	9	0	0	0	0	0	2	1	3	2	1	1	0	2	0	0	0	0	0
AC007325.1	ENSG00000276017	0	0	0	0	1	0	0	0	0	0	0	0	0	0	0	0	0	0	0	0	0	0	0	0	0	0	0	0	0	0	1	0	0	0	0	0
AC007325.4	ENSG00000278817	6	20	23	19	19	11	0	2	6	10	10	7	27	119	256	337	80	67	1	13	10	23	10	11	2	24	28	42	19	25	0	0	2	0	1	1
AC007326.5	ENSG00000284294	1	0	1	0	0	0	0	0	0	0	0	0	0	0	0	0	0	0	0	0	0	0	0	0	0	0	0	0	0	0	0	0	0	0	0	0
AC007333.2	ENSG00000260975	1	1	2	0	1	1	0	0	0	0	0	1	0	0	0	0	0	0	0	0	0	0	0	0	0	0	0	0	0	0	0	0	0	0	0	0
AC007336.1	ENSG00000261997	7	2	3	4	1	3	1	0	3	3	2	2	0	2	0	0	1	0	9	13	3	6	4	8	6	20	10	13	20	18	26	2	4	1	0	3
AC007342.4	ENSG00000261804	0	0	1	0	0	0	0	0	0	0	0	0	0	0	0	0	0	0	0	0	0	0	0	0	0	0	0	0	0	0	0	0	0	0	0	0
AC007364.1	ENSG00000231969	4	2	4	5	2	5	0	0	0	0	3	3	2	3	6	7	4	0	0	1	0	4	3	1	1	2	2	2	4	1	4	0	0	0	0	0
AC007365.1	ENSG00000226756	5	4	12	7	3	4	1	0	1	0	1	0	2	3	3	0	2	0	7	6	1	4	4	3	0	2	3	0	3	1	1	0	1	0	0	1
AC007368.1	ENSG00000255595	0	0	0	0	0	0	0	0	0	0	0	0	0	0	0	0	0	0	0	0	0	0	0	0	1	0	0	0	0	0	0	0	0	0	0	0
AC007370.1	ENSG00000250098	0	0	0	0	0	0	0	0	0	0	0	0	0	0	1	0	0	0	0	0	0	0	0	0	0	0	0	0	1	0	0	0	0	0	0	0
AC007370.2	ENSG00000250371	6	1	2	1	1	2	0	0	0	0	0	0	3	2	3	3	1	1	2	1	1	1	0	1	0	3	4	3	3	2	0	0	0	0	0	0
AC007375.3	ENSG00000269883	0	0	0	0	0	0	0	0	0	0	0	0	0	0	0	0	0	1	0	0	0	0	0	0	0	0	0	0	0	0	0	0	0	0	0	0
AC007376.2	ENSG00000258569	0	0	0	0	0	0	0	0	0	0	0	0	1	0	2	0	0	0	0	0	0	0	0	0	0	0	0	0	0	0	0	0	0	0	0	0
AC007378.1	ENSG00000273090	0	1	1	1	1	1	0	0	0	0	0	0	0	1	0	0	1	0	1	4	1	1	1	1	0	1	2	1	1	0	1	0	0	0	0	0
AC007383.2	ENSG00000227946	4	2	6	5	4	1	0	0	0	0	0	1	1	7	8	8	3	3	1	2	7	5	3	4	2	8	2	7	2	4	4	0	1	0	0	0
AC007383.3	ENSG00000231955	1	2	1	0	0	0	0	0	0	0	0	0	3	1	1	0	0	0	3	0	3	0	4	1	1	1	0	2	1	1	3	0	1	0	0	0
AC007383.4	ENSG00000279220	0	0	0	0	0	0	0	0	0	0	0	0	0	0	0	0	0	0	0	1	0	0	0	0	0	0	0	0	0	1	0	0	0	0	0	0
AC007384.1	ENSG00000237513	0	0	0	0	0	0	0	0	0	0	0	0	0	0	0	0	0	0	0	0	0	0	0	0	0	0	0	0	0	0	0	0	1	0	0	0
AC007388.1	ENSG00000231312	153	101	226	157	114	181	15	14	21	16	66	52	122	125	191	160	123	67	186	303	110	191	177	165	34	83	64	75	55	80	189	5	42	3	5	15
AC007389.1	ENSG00000204929	0	0	1	1	0	0	0	0	0	0	0	0	0	1	0	0	0	0	0	2	0	0	0	0	0	0	0	1	0	0	2	0	0	0	0	0
AC007389.3	ENSG00000235725	0	0	0	0	0	0	0	0	0	0	0	0	0	0	0	0	0	1	0	0	0	0	0	0	0	0	0	0	0	0	0	0	0	0	0	0
AC007389.5	ENSG00000281920	0	2	4	2	1	1	0	0	1	1	1	0	2	1	8	6	1	2	0	1	0	3	4	1	0	5	3	3	2	3	10	0	4	0	0	0
AC007391.1	ENSG00000232028	0	0	3	0	0	0	0	0	0	0	0	0	0	0	0	0	0	0	0	0	0	0	0	0	0	0	0	0	0	0	0	0	0	0	0	0
AC007405.1	ENSG00000234350	3	2	2	1	0	2	0	0	0	0	0	0	0	3	2	2	1	0	0	0	0	0	0	0	0	1	1	0	1	0	1	0	0	0	0	1
AC007405.3	ENSG00000239467	59	30	49	3	10	24	1	0	0	0	0	1	15	17	22	10	3	1	2	2	0	0	0	0	1	8	7	9	3	13	11	0	1	1	1	0
AC007406.3	ENSG00000256540	0	3	1	0	1	0	0	1	0	0	0	0	0	0	0	0	0	0	1	0	0	2	0	0	0	0	1	1	0	2	0	0	0	0	0	0
AC007406.4	ENSG00000256577	0	0	0	1	0	1	0	0	0	0	0	1	0	0	0	0	0	0	0	0	0	0	0	0	0	0	0	0	0	0	0	0	0	0	0	0
AC007423.1	ENSG00000271239	0	0	0	0	0	0	0	0	0	0	0	0	0	1	0	0	0	0	0	0	0	0	0	0	0	0	0	0	0	0	0	0	0	0	0	0
AC007448.3	ENSG00000266473	4	4	10	6	3	2	1	0	0	0	5	1	5	6	9	5	2	1	1	4	0	2	5	1	2	1	2	1	2	1	2	0	0	0	0	0
AC007485.1	ENSG00000275710	0	0	0	0	0	0	0	0	0	0	0	0	0	0	1	0	0	0	0	0	0	1	0	0	0	0	0	0	0	0	0	0	0	0	0	0
AC007491.1	ENSG00000283258	0	0	0	0	0	0	0	0	0	0	0	0	0	0	0	0	0	0	0	0	0	0	0	0	0	1	0	0	0	0	0	0	0	0	0	0
AC007493.1	ENSG00000260573	8	1	6	1	1	4	0	0	0	0	0	0	0	0	0	0	0	0	0	0	0	0	0	0	0	0	0	0	0	0	0	0	0	0	0	0
AC007494.2	ENSG00000260744	0	0	0	0	0	0	0	0	0	0	0	0	0	0	1	1	1	0	0	0	0	0	0	0	0	0	0	2	0	0	0	0	0	0	0	0
AC007496.1	ENSG00000260194	0	0	0	0	0	0	0	0	0	0	0	0	0	0	0	1	0	0	0	0	0	0	0	0	0	0	0	0	0	0	0	0	0	0	0	0
AC007496.2	ENSG00000261630	0	0	1	0	0	0	0	0	0	0	0	0	0	1	0	0	0	0	0	3	0	0	0	1	0	0	1	0	0	0	0	0	0	0	0	0
AC007527.1	ENSG00000256306	0	0	0	0	0	0	0	0	0	0	0	0	0	0	0	0	0	0	1	0	0	0	0	0	0	1	2	0	0	0	0	0	0	0	0	0
AC007529.1	ENSG00000255871	2	2	1	3	3	2	1	0	0	1	0	0	2	0	2	0	1	1	1	1	1	1	2	0	2	9	5	2	3	7	16	0	2	0	0	0
AC007529.2	ENSG00000283240	2	1	2	0	0	1	0	0	0	0	1	0	1	2	1	0	0	0	0	3	1	2	3	0	0	5	1	2	3	1	7	2	1	0	1	0
AC007533.1	ENSG00000261369	2	0	0	0	0	0	0	0	0	0	0	0	0	0	0	1	0	0	1	1	0	0	0	0	0	1	0	0	0	1	0	0	0	0	0	0
AC007540.1	ENSG00000257579	0	0	0	0	0	0	0	0	0	1	0	0	0	0	0	0	0	0	0	0	0	0	0	0	0	0	0	0	0	0	0	0	0	0	0	0
AC007541.1	ENSG00000260329	13	6	15	11	7	14	2	1	0	2	6	4	11	25	20	17	12	10	13	22	9	17	10	12	15	28	23	22	21	42	59	0	7	3	0	3
AC007552.2	ENSG00000256564	0	0	0	0	0	0	0	0	0	0	0	0	0	0	0	0	0	0	0	0	1	0	0	0	0	0	0	1	0	0	0	0	0	0	0	0
AC007557.1	ENSG00000227021	0	0	0	0	0	0	0	0	0	0	1	0	0	0	0	0	0	0	0	0	0	0	0	0	0	0	0	0	0	0	0	0	0	0	0	0
AC007563.1	ENSG00000229352	0	0	0	0	0	0	1	0	0	0	0	0	0	0	0	0	0	1	0	0	0	0	0	0	0	0	0	0	0	0	0	0	0	0	0	0
AC007563.2	ENSG00000236886	1	0	3	0	0	1	2	7	5	2	2	6	3	3	2	1	2	1	4	7	2	1	4	5	0	1	1	0	0	1	1	0	0	0	0	0
AC007566.1	ENSG00000244055	0	1	2	2	0	2	0	0	0	0	0	0	0	1	2	2	0	0	0	2	0	0	0	0	1	1	2	2	0	2	0	0	0	0	0	0
AC007569.1	ENSG00000257221	2	0	2	0	1	2	0	0	0	0	0	0	0	2	0	0	0	0	1	2	1	2	1	0	0	0	0	0	0	0	1	0	0	0	0	0
AC007570.1	ENSG00000255655	1	2	0	1	3	1	0	0	0	0	0	1	1	1	3	0	0	0	0	5	0	1	1	2	0	0	2	1	0	0	0	0	0	0	0	1
AC007601.1	ENSG00000175604	0	0	1	0	0	0	0	0	0	0	0	0	0	0	0	0	1	0	1	1	0	0	1	0	0	0	0	1	0	0	0	0	0	0	0	0
AC007608.1	ENSG00000205414	10	3	5	2	4	3	0	0	0	0	0	0	2	2	3	2	0	1	0	0	0	0	0	0	0	0	0	0	0	0	0	0	0	0	0	0
AC007608.2	ENSG00000260029	2	1	1	1	1	0	0	0	0	0	0	0	0	0	0	0	0	0	0	0	0	0	0	0	0	0	0	0	0	0	0	0	0	0	0	0
AC007608.3	ENSG00000260249	1	9	1	1	0	4	0	0	0	0	1	1	35	51	40	41	1	20	0	0	0	0	0	0	1	0	0	0	0	0	0	0	0	0	0	0
AC007610.1	ENSG00000259843	0	0	0	0	0	1	0	0	0	0	0	0	0	0	1	0	0	0	0	0	0	0	0	0	0	0	0	0	0	0	0	0	0	0	0	0
AC007611.1	ENSG00000260086	0	2	5	0	2	0	0	0	0	0	0	0	1	1	1	0	0	0	0	1	1	0	0	0	1	1	0	0	2	1	2	0	0	0	0	0
AC007613.1	ENSG00000262420	5	4	12	5	3	6	0	0	0	0	1	1	1	3	1	5	3	2	6	6	2	0	4	8	0	0	0	3	0	2	1	1	0	0	0	0
AC007620.2	ENSG00000242539	9	13	12	12	6	5	0	0	0	0	0	2	6	6	4	8	3	2	6	12	6	8	10	13	2	6	3	4	4	5	7	0	1	0	0	1
AC007620.3	ENSG00000272699	0	0	1	0	1	1	0	0	0	1	0	1	0	0	0	0	1	0	2	1	0	1	0	0	0	0	0	1	0	0	0	0	0	0	0	0
AC007622.2	ENSG00000258136	0	1	1	1	1	0	0	0	0	0	0	0	0	0	0	1	0	0	1	0	0	1	1	0	0	0	0	0	0	0	0	0	0	0	0	0
AC007638.2	ENSG00000263096	0	0	1	0	0	0	0	0	0	0	0	0	0	0	0	0	0	0	0	0	0	0	0	0	1	0	0	0	0	0	0	0	0	0	0	0
AC007639.1	ENSG00000263680	0	0	0	0	0	0	0	0	0	0	0	0	0	0	0	0	0	0	0	0	0	0	0	1	0	0	0	0	0	0	0	0	0	0	0	0
AC007655.1	ENSG00000256339	1	0	0	0	0	0	0	0	0	0	0	0	1	0	0	0	0	0	0	0	0	0	0	0	0	0	0	0	0	0	0	0	0	0	0	0
AC007656.1	ENSG00000258131	0	0	1	0	0	0	0	0	0	0	0	0	0	0	0	0	0	0	0	0	0	0	0	0	0	0	0	0	0	0	0	0	0	0	0	0
AC007663.2	ENSG00000249923	2	1	1	2	1	2	0	0	0	1	0	0	1	1	2	1	1	0	0	1	0	3	0	1	0	0	0	0	0	0	0	0	0	0	0	0
AC007663.3	ENSG00000273139	1	3	1	1	0	0	0	0	1	0	0	0	0	2	0	0	0	0	0	0	0	0	0	1	1	1	2	1	1	0	5	0	0	0	0	0
AC007666.1	ENSG00000236754	0	1	1	0	1	0	0	0	0	0	0	0	0	0	1	0	0	0	0	0	0	1	0	0	0	1	0	0	0	0	0	0	0	0	0	0
AC007673.1	ENSG00000267311	0	0	0	0	0	0	0	0	0	0	0	0	0	0	0	0	0	0	0	0	0	0	0	0	0	0	1	1	0	0	0	0	0	0	0	0
AC007681.1	ENSG00000270571	2	0	1	1	0	1	1	0	1	0	0	1	5	0	3	3	0	0	0	1	1	5	2	1	2	4	2	0	1	4	2	1	1	0	0	0
AC007686.3	ENSG00000273729	2	4	3	2	1	2	0	1	1	0	2	1	7	6	12	10	3	5	6	3	4	8	12	7	7	10	7	7	6	10	11	1	1	1	1	1
AC007687.1	ENSG00000270178	1	0	2	1	0	2	0	0	0	0	0	0	2	2	1	2	1	0	0	0	1	1	0	0	1	1	0	1	0	2	1	0	0	0	0	0
AC007688.2	ENSG00000256011	0	0	0	0	0	0	0	0	1	0	0	0	0	0	0	0	0	0	0	0	0	1	0	0	0	0	0	0	0	0	0	0	0	0	0	0
AC007728.1	ENSG00000260616	0	0	0	0	0	0	0	0	0	0	0	0	0	0	0	0	0	0	0	0	0	0	0	1	0	1	0	0	0	0	0	0	0	0	0	0
AC007728.2	ENSG00000261644	0	0	0	0	0	0	0	0	0	0	0	0	0	0	0	1	0	0	1	3	0	0	2	0	2	1	1	0	0	1	5	0	0	0	0	0
AC007731.3	ENSG00000235578	1	0	0	0	0	0	0	0	0	0	0	0	0	0	0	0	0	1	0	0	0	0	0	0	1	1	1	0	2	0	13	0	0	0	0	0
AC007731.4	ENSG00000236003	0	0	1	0	0	0	0	0	0	0	0	0	0	0	0	0	0	0	0	0	0	0	0	0	0	0	0	0	0	0	0	0	0	0	0	0
AC007743.1	ENSG00000233251	0	0	0	0	0	0	0	0	0	0	1	0	1	0	0	0	1	1	35	39	9	7	28	21	1	2	0	1	2	2	0	0	0	0	0	1
AC007744.1	ENSG00000271894	0	0	0	0	0	0	0	0	0	1	0	0	1	1	1	0	3	1	14	15	3	2	7	5	1	1	0	0	2	0	0	0	0	0	0	0
AC007750.1	ENSG00000236841	0	1	0	1	0	1	0	0	1	0	0	0	0	0	0	1	0	0	0	0	0	0	0	0	0	0	0	0	1	0	1	0	0	0	0	0
AC007773.1	ENSG00000267213	16	11	18	16	13	6	0	1	5	2	8	5	15	25	34	16	10	11	13	21	8	12	7	8	6	12	7	8	9	16	34	0	5	1	0	0
AC007780.1	ENSG00000267009	1	0	1	0	0	1	0	0	0	0	0	0	0	0	0	0	0	0	0	0	0	0	0	0	0	0	0	0	0	0	0	0	0	0	0	0
AC007785.3	ENSG00000268401	1	1	1	0	1	1	0	0	0	0	0	0	1	4	1	1	1	0	0	2	1	0	0	0	0	0	0	0	1	0	1	0	0	0	0	0
AC007786.1	ENSG00000267498	1	1	0	0	1	0	1	0	0	1	0	1	0	1	1	0	0	1	0	1	0	0	1	0	0	2	2	1	0	2	3	0	1	0	0	0
AC007786.2	ENSG00000276251	0	0	1	0	0	0	0	0	0	0	0	0	0	0	1	0	0	0	0	0	0	0	0	0	0	0	0	0	0	0	0	0	0	0	0	0
AC007786.3	ENSG00000276631	1	0	0	0	0	0	0	0	0	0	0	0	0	0	0	0	0	0	0	0	0	0	0	0	0	0	0	0	0	0	0	0	0	0	0	0
AC007787.1	ENSG00000267610	0	0	0	0	0	0	0	0	0	0	0	0	0	0	0	0	0	0	0	0	0	0	0	0	0	0	0	0	0	1	0	0	0	0	0	0
AC007823.1	ENSG00000260743	1	0	0	1	0	0	0	0	1	0	0	1	0	0	2	1	1	0	1	0	0	3	1	0	1	2	1	2	0	0	1	1	0	1	0	0
AC007846.1	ENSG00000284837	0	0	0	0	0	0	0	0	0	0	0	0	2	0	0	1	0	0	0	0	0	0	0	0	0	0	0	0	0	0	0	0	0	0	0	0
AC007848.1	ENSG00000255983	0	0	0	0	0	0	0	0	0	0	0	0	0	0	0	0	0	0	0	2	0	0	0	0	1	2	4	0	2	2	0	0	0	0	0	0
AC007848.2	ENSG00000256218	0	0	1	0	0	0	0	0	0	0	0	0	0	0	1	0	0	0	0	0	0	0	0	0	0	1	0	0	0	0	0	0	0	0	0	0
AC007861.1	ENSG00000262950	0	0	0	0	0	0	0	0	0	0	0	0	0	0	0	0	0	0	0	0	0	0	0	0	0	0	0	0	0	0	1	0	0	0	0	0
AC007878.1	ENSG00000281195	14	8	17	10	12	19	3	1	1	0	3	5	6	5	15	6	2	6	7	16	12	13	9	14	9	8	9	7	10	5	5	1	4	0	2	0
AC007879.2	ENSG00000225916	0	0	0	1	0	0	0	0	0	1	0	1	0	0	0	0	0	0	0	3	0	0	1	0	0	1	0	1	0	2	1	0	0	0	0	0
AC007879.3	ENSG00000234902	0	0	3	3	0	0	0	0	0	1	0	0	1	1	1	1	2	0	4	4	5	7	5	1	0	2	2	2	0	2	5	0	0	0	0	0
AC007879.4	ENSG00000240440	0	0	0	0	0	0	0	0	0	0	0	0	0	0	0	0	0	0	0	0	0	0	1	0	0	0	0	0	0	0	0	0	0	0	0	0
AC007881.3	ENSG00000272735	3	1	2	1	1	1	0	0	0	0	0	0	0	1	2	0	2	1	0	1	0	2	0	1	2	2	0	0	3	2	3	0	0	0	0	0
AC007906.2	ENSG00000277639	1	5	8	1	6	5	2	0	0	0	1	1	0	0	0	0	1	0	2	7	5	5	6	2	1	3	0	3	2	3	5	0	0	0	0	0
AC007920.2	ENSG00000283175	0	0	0	0	0	0	0	0	0	0	0	0	1	0	0	0	1	0	0	2	0	0	0	0	0	0	2	0	1	0	32	1	5	1	2	2
AC007922.1	ENSG00000264695	0	0	0	0	0	0	0	0	0	0	0	0	1	0	0	0	0	0	0	0	0	0	0	0	0	0	0	0	0	0	0	0	0	0	0	0
AC007923.1	ENSG00000263567	0	0	0	0	0	0	0	0	0	0	0	0	0	0	0	0	0	0	0	9	0	1	0	1	0	0	0	0	0	1	0	0	0	0	0	0
AC007938.1	ENSG00000259920	0	1	2	0	1	1	0	0	0	0	0	0	0	0	1	1	1	2	0	1	0	2	0	0	0	1	0	0	0	0	0	0	0	0	0	0
AC007938.2	ENSG00000270823	5	8	13	7	4	6	0	0	1	1	1	3	2	2	6	6	3	2	3	1	3	3	3	4	2	5	9	7	4	4	1	0	0	1	0	0
AC007938.3	ENSG00000270953	44	26	77	36	31	46	11	9	11	5	22	47	46	32	57	36	27	39	33	58	34	28	24	54	4	5	11	6	11	8	4	0	0	0	0	0
AC007950.2	ENSG00000276651	4	6	4	5	1	7	1	0	0	0	1	2	9	3	10	6	4	5	3	2	1	4	1	2	2	3	1	1	6	2	5	0	1	1	0	0
AC007952.2	ENSG00000228157	3	2	4	4	1	3	1	0	0	0	0	1	2	1	0	0	0	0	0	2	0	0	2	2	1	0	2	2	0	2	1	0	1	0	0	0
AC007952.3	ENSG00000230197	4	4	5	3	4	1	1	0	0	0	2	4	0	0	0	0	0	1	0	0	0	0	2	0	0	1	0	1	1	2	1	0	0	0	0	0
AC007952.4	ENSG00000262202	60	44	67	45	20	40	1	2	0	2	4	1	24	47	52	43	20	21	20	37	16	35	26	31	42	131	125	135	70	62	60	5	28	2	1	3
AC007952.5	ENSG00000262292	0	0	2	2	0	1	0	0	0	0	0	1	0	0	0	0	0	0	0	1	0	0	0	0	0	0	0	0	0	1	0	0	0	0	0	0
AC007952.6	ENSG00000262319	1	0	1	0	2	1	0	0	0	0	0	0	0	0	0	1	0	0	0	0	0	0	1	0	1	1	1	3	1	6	2	0	0	0	0	0
AC007952.7	ENSG00000263394	0	0	0	0	0	1	0	1	0	0	0	0	0	0	0	0	1	0	0	1	0	1	0	0	0	1	0	0	0	0	0	0	0	0	0	0
AC007952.8	ENSG00000266311	0	0	0	0	0	0	1	0	0	0	0	0	0	0	0	0	0	0	0	0	0	0	0	0	0	0	1	0	0	0	0	0	0	0	0	0
AC007953.1	ENSG00000225790	0	0	0	0	0	0	0	0	0	0	0	0	1	0	0	0	0	0	0	0	0	0	0	0	0	0	0	0	0	0	0	0	0	0	0	0
AC007953.2	ENSG00000270321	0	0	0	0	0	0	0	0	0	0	0	0	0	0	2	0	0	0	0	0	0	0	0	0	0	0	0	0	0	0	0	0	0	0	0	0
AC007966.1	ENSG00000226747	1	0	0	0	0	0	0	0	0	0	0	0	0	0	0	0	0	0	0	0	0	0	0	0	0	0	1	0	0	0	0	0	0	0	0	0
AC007998.2	ENSG00000267140	0	2	1	0	1	1	0	0	0	0	0	1	0	0	1	0	0	0	1	1	0	2	2	3	0	1	3	1	1	2	0	0	0	0	0	0
AC007998.3	ENSG00000267583	0	0	0	0	0	0	0	0	0	0	0	0	0	0	1	0	0	0	0	0	0	1	1	0	0	0	0	1	0	0	0	0	0	0	0	0
AC007998.4	ENSG00000275512	0	2	2	1	3	1	0	0	0	0	0	1	0	0	0	0	2	1	0	4	2	0	3	2	1	1	1	1	2	2	0	0	0	0	0	0
AC008011.2	ENSG00000257042	0	1	3	0	0	3	0	0	0	0	0	0	0	0	0	0	0	0	6	6	4	3	6	2	0	1	0	6	0	1	11	0	2	0	0	1
AC008014.1	ENSG00000257261	14	7	21	8	8	4	0	3	0	2	8	8	21	18	29	18	8	4	22	22	11	10	12	10	1	6	6	4	4	11	11	0	2	0	0	0
AC008033.3	ENSG00000273824	0	1	0	0	1	0	0	0	0	0	0	0	0	0	0	0	0	0	0	2	0	0	0	0	0	0	0	0	0	0	0	0	0	0	0	0
AC008035.1	ENSG00000272369	2	6	10	4	5	8	0	0	5	1	8	5	18	15	25	12	8	8	9	18	8	12	6	5	1	2	1	1	9	10	9	0	1	0	1	0
AC008040.1	ENSG00000239219	2	1	0	1	0	0	0	0	0	0	0	0	0	0	0	1	1	0	0	2	0	1	0	0	1	1	0	0	1	3	0	0	0	0	0	0
AC008040.5	ENSG00000268220	2	1	9	3	3	4	0	0	0	0	0	2	4	1	3	3	0	2	1	3	1	3	2	4	0	2	2	3	1	4	3	0	1	0	0	0
AC008050.1	ENSG00000259124	0	0	0	0	0	0	0	0	0	0	0	0	1	0	0	0	0	0	0	0	0	0	0	0	0	0	0	0	0	0	0	0	0	0	0	0
AC008056.1	ENSG00000258637	0	0	0	0	0	0	0	0	0	0	0	0	1	0	0	0	0	0	0	0	0	0	0	0	0	0	0	0	0	0	0	0	0	0	0	0
AC008060.1	ENSG00000218672	0	0	0	0	0	0	0	0	0	0	0	0	0	0	0	0	0	0	0	0	0	0	0	0	0	0	1	0	0	0	0	0	0	0	0	0
AC008063.1	ENSG00000230918	0	0	0	0	0	0	0	0	0	0	0	0	0	0	0	0	0	0	0	0	0	0	0	0	0	0	0	0	0	0	1	0	0	0	0	0
AC008063.2	ENSG00000233397	0	0	0	0	0	0	0	0	0	0	0	0	0	1	0	1	0	0	0	0	0	1	0	0	0	1	2	1	2	0	2	0	0	0	0	0
AC008073.1	ENSG00000223754	0	0	0	0	0	0	0	0	0	0	0	0	0	0	0	1	0	0	1	1	0	0	0	1	0	0	1	0	1	1	1	0	0	0	0	0
AC008073.3	ENSG00000276087	0	0	0	0	0	0	0	0	0	0	0	0	0	1	0	0	1	0	0	0	0	0	0	0	0	1	1	0	0	0	0	0	0	0	0	0
AC008074.1	ENSG00000223935	0	0	0	0	3	2	0	0	0	0	0	0	0	1	0	0	0	0	0	0	0	0	0	0	0	0	0	0	0	0	0	0	0	0	0	0
AC008074.3	ENSG00000260101	2	3	3	1	2	2	0	0	0	0	0	1	4	2	1	0	3	1	0	2	1	0	1	1	0	2	3	3	0	1	1	0	1	0	0	0
AC008079.2	ENSG00000280007	2	4	3	0	1	6	0	0	0	2	1	1	4	10	16	9	2	6	8	0	4	4	6	3	0	4	8	2	4	6	8	0	1	0	0	0
AC008080.1	ENSG00000173862	0	0	0	0	0	0	0	0	0	0	0	0	0	0	0	0	0	0	0	1	0	0	0	1	0	0	0	0	0	1	0	0	0	0	0	0
AC008083.1	ENSG00000257925	0	0	0	0	0	0	0	0	0	0	0	0	0	0	0	0	0	0	0	1	0	0	0	0	0	0	0	0	0	0	0	0	0	0	0	0
AC008083.2	ENSG00000258181	6	1	2	0	0	2	0	0	0	0	1	0	2	1	3	2	1	0	1	3	2	0	0	1	1	3	0	1	2	3	0	0	0	0	0	1
AC008083.3	ENSG00000276454	0	0	0	0	0	0	0	0	0	0	0	0	0	0	0	0	0	0	0	0	0	0	0	0	0	0	0	0	0	1	0	0	0	0	0	0
AC008105.1	ENSG00000233175	1	0	0	0	0	0	0	0	0	0	1	0	1	2	3	3	1	0	5	2	0	0	0	0	0	1	1	0	1	0	0	0	0	0	0	0
AC008105.3	ENSG00000267121	2	2	5	1	1	1	2	1	1	0	3	1	8	10	25	14	4	6	6	10	2	6	9	4	8	13	17	19	23	6	6	0	1	0	0	0
AC008114.1	ENSG00000255649	0	0	0	0	0	0	0	0	0	0	0	0	0	0	0	0	0	0	0	0	0	0	0	0	0	0	0	0	0	0	0	0	0	0	0	0
AC008115.1	ENSG00000256658	0	0	0	0	0	0	0	0	0	0	0	0	0	0	0	0	0	0	0	1	0	0	0	0	0	0	0	0	0	0	0	0	0	0	0	0
AC008115.4	ENSG00000275963	0	2	0	0	0	0	0	0	0	0	2	0	0	0	2	1	0	1	0	0	0	0	0	0	0	0	0	2	1	2	1	0	0	0	1	1
AC008121.2	ENSG00000274156	0	0	0	1	0	3	0	0	0	0	0	0	0	2	0	1	1	0	1	0	0	0	2	0	0	0	0	0	0	0	0	0	0	0	0	0
AC008121.3	ENSG00000274797	0	0	0	1	0	0	0	0	0	0	0	0	0	0	0	0	0	0	0	1	0	0	1	0	0	0	0	0	0	0	0	1	0	0	0	0
AC008124.1	ENSG00000273015	46	33	54	46	31	41	1	5	8	2	9	13	52	58	90	58	31	27	34	55	32	48	44	48	25	55	64	72	36	40	74	7	16	1	1	5
AC008147.1	ENSG00000257256	0	0	0	0	0	0	0	0	0	0	0	0	0	0	0	0	0	0	0	0	0	0	0	0	0	0	0	1	0	0	0	0	0	0	0	0
AC008149.1	ENSG00000258177	1	0	0	1	1	1	0	0	0	0	0	0	0	1	0	0	0	0	0	1	0	0	0	1	0	0	0	0	0	0	0	0	0	0	0	0
AC008154.2	ENSG00000231098	0	0	0	0	0	0	0	0	0	0	0	0	0	0	0	0	1	0	0	0	0	0	0	0	0	0	0	0	0	0	0	0	0	0	0	0
AC008243.1	ENSG00000251175	0	0	0	0	0	0	0	0	0	0	0	0	0	1	1	0	0	0	0	0	0	0	0	0	0	0	0	0	0	0	0	0	0	0	0	0
AC008264.2	ENSG00000273489	3	1	3	2	3	2	0	0	2	1	3	0	0	0	2	3	5	0	28	15	9	14	31	25	24	36	42	40	8	53	36	5	25	4	1	25
AC008267.5	ENSG00000237310	26	27	53	29	27	29	2	2	3	4	8	15	47	76	101	67	25	30	26	53	25	32	21	26	19	46	38	34	24	40	81	3	14	1	1	3
AC008269.1	ENSG00000229321	0	1	0	0	0	0	0	0	0	0	0	0	2	2	1	1	0	0	2	2	0	0	0	0	0	1	0	0	0	1	0	0	0	0	0	0
AC008269.2	ENSG00000260171	0	0	0	0	0	0	0	0	0	0	0	0	0	0	0	0	0	0	0	0	0	0	0	0	0	0	0	0	0	0	0	0	0	0	0	0
AC008280.3	ENSG00000272156	3	0	0	1	1	2	1	0	0	0	2	0	0	2	6	2	3	1	0	0	0	0	0	0	1	0	4	4	3	5	3	0	1	0	0	0
AC008378.1	ENSG00000253172	0	2	0	0	0	0	0	0	0	0	0	1	0	0	1	0	0	0	0	0	0	0	0	0	0	0	0	0	0	0	1	0	0	0	0	0
AC008392.1	ENSG00000268186	4	2	9	6	0	2	0	0	0	0	0	2	1	0	2	2	2	1	0	3	2	3	0	1	2	0	1	0	0	1	0	0	0	0	0	0
AC008393.1	ENSG00000245317	1	5	4	5	2	5	0	0	1	1	0	1	7	10	15	9	2	5	0	12	0	4	4	6	7	10	5	6	4	9	12	0	2	0	0	0
AC008397.2	ENSG00000285188	0	0	0	0	0	1	0	0	0	0	0	0	0	0	0	0	0	0	0	0	0	0	0	0	0	0	0	0	0	0	0	0	0	0	0	0
AC008403.2	ENSG00000268530	0	0	1	0	0	0	0	0	0	0	0	0	0	0	2	0	0	0	0	1	0	0	0	0	0	1	0	0	0	0	2	0	0	0	0	0
AC008403.3	ENSG00000269814	4	0	4	1	2	0	0	0	0	0	0	0	2	1	1	1	0	0	0	3	0	2	1	2	0	0	0	0	0	0	0	0	0	0	0	0
AC008406.2	ENSG00000248753	0	0	0	0	0	1	0	0	0	0	0	0	0	0	0	0	0	0	0	0	0	0	0	0	0	0	0	0	0	0	0	0	0	0	0	0
AC008415.1	ENSG00000253693	0	0	0	0	0	0	0	0	0	1	0	0	0	0	0	0	0	0	0	0	0	0	0	0	0	0	0	0	0	0	0	0	0	0	0	0
AC008429.1	ENSG00000204758	15	15	25	25	14	23	2	0	1	1	0	4	18	39	62	35	19	28	9	14	8	16	13	29	6	20	19	27	17	30	16	0	7	0	1	0
AC008429.3	ENSG00000254295	1	0	0	0	1	0	0	0	0	0	0	0	0	0	1	1	0	0	0	2	0	0	0	0	1	0	0	1	0	0	2	0	0	0	0	0
AC008434.1	ENSG00000249655	0	0	0	0	0	1	0	0	0	0	0	0	0	1	1	0	1	0	0	0	1	0	0	0	0	0	0	0	0	0	0	0	0	0	0	0
AC008438.1	ENSG00000249637	0	0	0	0	0	0	0	0	0	0	0	0	1	2	0	0	0	0	0	1	0	0	0	0	0	2	1	0	0	0	0	0	0	0	0	0
AC008438.2	ENSG00000253965	0	0	0	0	0	0	0	0	0	0	0	0	0	0	0	0	0	0	0	0	0	0	0	0	0	0	0	0	0	0	0	0	0	0	0	0
AC008440.1	ENSG00000228323	1	1	3	0	0	0	0	0	0	0	0	1	0	0	0	0	0	0	0	0	0	0	0	0	0	0	0	0	0	0	0	0	0	0	0	0
AC008440.2	ENSG00000232220	0	2	0	2	1	1	1	0	1	0	0	2	1	1	0	1	3	2	0	1	0	0	2	0	0	0	0	0	0	0	1	0	0	0	0	0
AC008440.3	ENSG00000232324	0	0	0	0	0	0	0	0	0	0	0	0	0	0	0	0	0	0	1	0	0	0	0	0	0	0	0	0	0	0	0	0	0	0	0	0
AC008443.1	ENSG00000233937	55	26	58	40	19	42	2	1	3	4	2	9	17	37	49	37	12	14	23	38	13	36	26	28	12	36	30	22	23	37	48	1	12	0	2	4
AC008443.3	ENSG00000248103	21	3	7	4	1	0	0	0	0	0	0	0	7	1	6	2	3	0	3	1	2	2	3	0	0	0	0	0	0	0	0	0	0	0	0	0
AC008443.4	ENSG00000248514	0	0	0	1	0	0	0	0	0	0	0	0	0	0	0	0	0	0	0	0	0	0	0	0	0	0	0	0	0	0	0	0	0	0	0	0
AC008443.5	ENSG00000250222	16	12	9	10	5	10	1	2	3	0	4	11	21	32	35	24	20	13	13	40	8	12	13	16	8	9	11	9	13	10	43	0	8	1	0	0
AC008443.6	ENSG00000250900	0	1	1	0	1	0	0	0	0	1	0	0	0	0	1	0	0	0	0	0	0	1	0	0	1	1	1	1	0	0	0	0	0	0	0	0
AC008464.1	ENSG00000253660	3	2	5	1	3	1	0	0	0	0	0	0	0	0	0	0	3	0	0	0	0	0	0	0	0	0	0	0	0	0	0	0	0	0	0	0
AC008467.1	ENSG00000249476	23	32	54	42	25	24	2	2	5	8	2	9	27	37	40	33	11	14	13	24	7	19	9	15	10	15	13	17	12	14	21	0	2	0	0	0
AC008494.3	ENSG00000271797	3	4	4	1	3	4	0	1	0	0	1	0	5	2	5	1	0	2	2	4	4	1	3	5	2	1	0	6	1	3	6	2	1	1	0	0
AC008496.2	ENSG00000250258	0	0	0	1	0	0	0	0	1	0	0	0	1	1	1	0	0	0	0	1	0	0	0	0	0	0	0	0	1	0	0	0	0	0	0	0
AC008505.1	ENSG00000283462	0	0	0	0	0	0	0	0	0	0	0	1	0	0	1	0	0	1	0	0	0	0	0	0	0	0	0	0	0	0	0	0	0	0	0	0
AC008507.2	ENSG00000267006	0	1	0	0	1	0	0	0	0	0	0	0	0	0	0	0	0	0	0	0	0	0	0	1	0	0	0	0	0	0	0	0	0	0	0	0
AC008522.1	ENSG00000279232	3	3	7	0	7	3	0	0	0	0	0	4	8	2	15	7	5	3	47	70	28	54	45	36	10	15	21	13	8	18	15	0	4	2	0	1
AC008537.1	ENSG00000268797	0	0	0	0	0	0	0	0	0	0	0	0	0	0	0	0	0	0	0	0	0	0	0	0	0	1	0	0	0	0	0	0	0	0	0	0
AC008537.4	ENSG00000282951	0	0	4	0	0	0	0	0	0	0	0	1	0	0	1	0	1	1	1	2	0	0	0	0	0	0	1	0	1	0	0	0	0	0	0	0
AC008543.1	ENSG00000197332	6	3	5	5	0	3	1	0	1	0	0	1	2	2	0	0	0	1	3	5	5	8	3	2	1	7	1	8	2	8	0	0	2	0	1	0
AC008543.5	ENSG00000267646	0	0	0	0	0	0	0	0	0	0	0	0	0	0	0	0	0	0	0	0	0	0	0	0	0	0	0	0	2	0	0	0	0	0	0	0
AC008549.2	ENSG00000249021	0	0	0	0	2	0	1	0	0	0	0	0	5	4	2	5	0	1	2	0	1	1	0	0	1	1	6	4	3	4	6	0	0	0	0	1
AC008551.1	ENSG00000263331	0	0	0	0	1	0	1	0	0	0	0	0	0	0	0	0	0	0	1	0	0	0	0	0	0	2	0	0	0	2	1	0	0	0	0	0
AC008555.1	ENSG00000261754	1	0	0	0	0	0	1	0	0	0	0	0	0	0	0	0	0	0	0	0	0	0	0	0	0	0	0	0	0	0	0	0	0	0	0	0
AC008555.2	ENSG00000269086	0	0	0	0	0	0	0	0	0	0	0	0	0	0	0	0	0	0	0	0	0	1	0	0	0	0	0	1	0	0	0	0	0	0	0	0
AC008555.3	ENSG00000270544	0	0	0	0	0	0	0	0	0	0	0	0	0	0	1	0	0	0	0	0	0	0	0	0	0	0	0	0	0	0	0	0	0	0	0	0
AC008555.5	ENSG00000271109	3	0	0	0	1	2	0	0	0	0	0	0	0	0	0	0	0	0	0	0	0	0	0	0	0	0	0	0	0	0	0	0	0	0	0	0
AC008556.1	ENSG00000277013	0	0	0	0	3	0	0	0	1	0	0	1	1	0	0	0	0	0	2	0	0	0	1	1	0	0	0	0	1	0	0	0	0	0	0	0
AC008569.1	ENSG00000267379	0	0	0	0	0	0	0	0	0	0	0	0	0	0	0	0	0	0	0	0	0	0	0	0	0	0	0	0	0	0	1	0	0	0	0	0
AC008581.1	ENSG00000250615	0	0	0	0	0	0	0	0	0	0	0	0	0	0	0	0	0	0	0	0	0	0	0	0	0	0	0	0	0	1	0	0	0	0	0	0
AC008581.2	ENSG00000285000	0	0	1	0	0	1	0	0	0	0	0	0	0	0	0	0	0	0	0	1	0	0	0	0	0	0	0	0	0	0	0	0	0	0	0	0
AC008591.1	ENSG00000251680	0	1	0	0	0	0	0	0	0	0	0	0	0	0	1	0	0	0	0	0	0	0	0	1	0	0	0	0	0	0	0	0	0	0	0	0
AC008592.1	ENSG00000250362	0	0	0	0	0	0	0	0	0	0	0	0	0	0	1	0	0	0	0	2	0	0	0	0	0	0	0	0	0	0	0	0	0	0	0	0
AC008592.5	ENSG00000272021	0	0	0	0	0	0	0	0	0	0	0	0	0	0	1	1	0	0	0	0	0	0	0	0	0	0	0	0	0	0	0	0	0	0	0	0
AC008608.2	ENSG00000271737	18	29	32	24	9	15	1	4	2	2	5	8	11	29	27	21	11	12	23	47	12	29	23	30	24	49	44	40	27	41	66	1	13	2	0	5
AC008609.1	ENSG00000247699	0	0	0	0	0	0	0	0	0	0	0	0	0	1	2	0	0	0	0	0	0	0	0	0	0	0	0	0	0	0	0	0	0	0	0	0
AC008610.1	ENSG00000248367	3	6	7	5	1	3	0	0	0	0	3	1	2	3	8	4	2	1	4	4	0	2	0	2	2	3	4	5	3	3	8	0	2	1	0	0
AC008619.1	ENSG00000253858	0	0	0	0	0	0	0	0	0	0	0	0	0	0	0	0	0	0	0	0	0	0	0	0	0	0	0	0	0	1	0	0	0	0	0	0
AC008622.2	ENSG00000275719	3	5	6	3	1	3	0	1	0	0	0	1	0	2	1	1	1	1	1	10	2	2	6	1	1	7	2	3	2	4	10	0	1	1	1	2
AC008629.1	ENSG00000249494	0	0	2	0	0	0	0	0	0	0	0	0	0	0	2	0	0	0	0	0	0	1	2	1	0	0	0	1	2	0	0	0	0	0	0	0
AC008637.1	ENSG00000253978	5	0	1	0	1	2	0	0	1	0	0	0	0	0	0	0	1	0	0	0	0	0	0	0	0	0	0	0	0	0	0	0	0	0	1	0
AC008641.1	ENSG00000254298	0	0	0	0	0	0	0	0	0	0	0	0	0	0	0	0	0	0	1	0	0	0	0	0	0	0	0	0	0	0	0	0	0	0	0	0
AC008649.1	ENSG00000267291	0	0	0	0	0	1	0	0	0	0	0	0	12	18	18	17	2	11	0	0	0	0	0	0	0	0	0	0	0	0	0	0	0	0	0	0
AC008655.1	ENSG00000267815	0	0	0	0	0	0	0	0	0	0	0	0	0	0	0	0	0	0	0	0	0	0	0	0	0	0	0	0	0	1	0	0	0	0	0	0
AC008662.1	ENSG00000253331	0	0	0	0	0	0	0	0	0	0	0	0	0	0	0	0	0	0	0	0	0	0	0	0	0	0	0	0	0	0	0	0	0	0	0	0
AC008663.1	ENSG00000253768	0	0	0	0	0	0	0	0	0	0	0	0	0	1	1	0	0	0	0	0	0	0	0	0	0	0	0	0	0	0	0	0	0	0	0	0
AC008663.2	ENSG00000253955	0	0	0	0	0	0	0	0	0	0	0	0	0	0	0	2	0	0	1	0	0	0	0	0	0	0	0	0	0	0	0	0	0	0	0	0
AC008667.1	ENSG00000249526	0	0	0	0	0	0	0	0	0	0	0	0	0	0	0	0	0	0	0	0	0	0	0	0	0	0	0	0	0	0	0	0	0	0	0	0
AC008667.4	ENSG00000271792	0	0	1	0	0	1	0	0	0	0	0	0	0	1	0	0	0	0	0	1	0	0	0	0	0	1	0	1	0	0	0	0	0	0	0	0
AC008676.1	ENSG00000248544	8	5	25	2	4	4	0	2	3	0	0	0	1	1	32	3	3	1	3	10	9	4	7	9	1	1	9	1	2	4	0	0	0	0	0	0
AC008686.1	ENSG00000267633	1	0	0	0	0	3	0	1	0	0	0	0	0	1	1	0	0	0	1	0	0	0	0	0	1	1	1	2	2	1	2	0	0	0	0	0
AC008687.2	ENSG00000268108	0	0	0	0	0	0	0	0	0	0	0	0	0	0	0	0	0	0	0	0	0	1	0	0	0	0	0	1	0	0	0	0	1	0	0	0
AC008687.4	ENSG00000268655	0	0	0	0	0	0	0	0	0	0	0	0	0	0	0	0	0	0	0	0	0	0	0	0	5	3	6	8	3	5	1	0	0	0	0	0
AC008691.1	ENSG00000249738	0	0	0	0	0	0	0	0	0	0	0	0	0	0	0	0	1	0	1	2	1	2	3	0	0	2	0	2	1	2	0	0	0	0	0	0
AC008700.1	ENSG00000248125	0	0	0	0	0	0	0	0	0	0	0	0	0	0	0	0	0	0	0	0	0	0	0	0	0	0	0	0	0	0	0	0	0	0	0	0
AC008703.1	ENSG00000283413	0	0	0	0	0	0	0	0	0	0	1	0	0	0	0	0	0	0	0	1	0	1	1	2	0	0	0	0	0	0	0	0	0	0	0	0
AC008708.2	ENSG00000254187	0	0	0	0	0	0	0	0	0	0	0	0	0	0	1	1	0	1	0	1	1	1	1	1	0	0	0	0	0	0	1	0	0	0	0	0
AC008728.1	ENSG00000250407	0	1	0	0	0	0	0	0	0	0	0	0	0	0	0	0	0	0	1	0	0	0	0	0	0	0	0	0	0	0	0	0	0	0	0	0
AC008731.1	ENSG00000261669	6	4	10	7	2	3	0	0	0	0	0	1	3	5	7	1	2	2	3	6	1	3	1	2	3	7	5	2	1	1	6	0	1	1	0	0
AC008735.2	ENSG00000267523	3	1	5	3	3	1	0	0	0	0	0	0	2	0	5	2	2	0	6	6	2	5	3	4	0	2	0	1	1	1	0	0	1	1	0	0
AC008735.4	ENSG00000276488	0	0	0	0	1	0	0	0	0	0	0	1	0	0	0	0	1	0	0	0	0	0	0	0	0	0	0	0	1	1	1	0	0	0	0	0
AC008736.1	ENSG00000267475	5	6	6	8	5	7	0	1	1	0	4	1	4	4	14	6	3	1	2	3	6	7	6	5	3	4	4	7	3	5	12	1	4	1	3	1
AC008738.2	ENSG00000267130	0	0	0	0	0	0	0	0	0	0	0	0	1	0	0	0	0	0	0	0	0	0	0	0	0	0	0	1	0	0	0	0	0	0	0	0
AC008741.2	ENSG00000274925	55	31	47	28	13	46	2	1	5	3	4	13	45	37	47	28	19	23	23	36	11	21	26	19	14	19	36	29	35	31	33	2	4	1	3	4
AC008747.1	ENSG00000267024	1	1	2	1	3	0	0	0	0	1	1	0	0	3	0	2	2	1	0	0	1	1	1	0	0	1	0	2	0	1	3	0	0	0	0	0
AC008750.2	ENSG00000255441	1	0	1	1	0	0	0	0	0	0	0	1	0	0	1	0	0	0	0	0	0	0	0	0	0	0	1	0	0	0	1	0	0	0	0	0
AC008750.7	ENSG00000268889	1	0	0	0	0	0	0	0	0	0	0	0	0	0	0	0	1	0	0	1	0	1	0	2	0	1	1	0	2	1	1	0	0	0	1	0
AC008750.8	ENSG00000269403	0	0	1	2	1	0	0	0	0	0	0	0	1	1	0	0	0	0	0	1	0	0	0	1	0	0	0	0	0	0	2	0	0	0	0	0
AC008752.1	ENSG00000266950	0	0	0	0	0	0	0	0	0	0	0	0	0	0	0	0	0	0	0	0	0	0	0	1	0	0	0	0	0	0	0	0	0	0	0	0
AC008752.2	ENSG00000267289	0	0	0	0	0	2	0	0	0	0	0	2	0	1	1	0	0	1	0	1	0	2	0	0	0	2	0	1	0	0	0	1	1	0	0	0
AC008758.4	ENSG00000268744	2	2	3	2	0	2	0	0	0	0	0	0	0	0	0	0	0	0	1	0	0	1	0	1	1	3	4	4	2	6	4	0	1	0	0	0
AC008758.6	ENSG00000269755	0	0	0	0	0	0	0	0	0	0	0	0	0	0	0	0	0	1	0	0	0	0	0	0	0	0	0	0	0	0	0	0	0	0	0	0
AC008763.2	ENSG00000268400	6	13	14	11	6	3	0	1	1	0	2	2	7	5	22	7	6	1	20	22	7	11	10	27	5	11	6	6	12	6	6	1	1	0	0	2
AC008764.2	ENSG00000268087	0	1	0	0	0	0	0	0	0	0	0	0	1	1	0	0	0	0	1	1	0	0	1	1	0	1	0	0	1	0	0	1	0	0	0	0
AC008764.3	ENSG00000268309	0	0	1	0	0	1	0	0	0	0	0	0	0	1	0	1	0	0	0	2	0	0	1	0	0	0	2	1	0	0	0	0	0	0	0	0
AC008764.6	ENSG00000269399	6	3	7	8	5	7	0	1	0	0	1	0	7	4	7	5	5	2	2	8	0	3	2	9	0	4	3	7	7	5	6	0	1	1	1	0
AC008764.8	ENSG00000279529	9	4	17	5	5	9	0	0	1	0	2	3	14	24	15	21	7	11	9	10	3	9	18	8	7	9	8	6	8	12	10	0	6	1	0	1
AC008770.1	ENSG00000257355	0	0	1	0	0	0	0	0	0	0	0	0	0	0	0	0	0	0	0	0	0	0	0	0	0	0	1	0	0	0	0	0	0	0	0	0
AC008771.1	ENSG00000249042	39	18	87	46	41	56	2	1	7	11	18	12	50	50	105	75	33	35	36	87	25	36	43	43	14	26	24	18	30	28	103	1	7	2	1	1
AC008780.2	ENSG00000249436	0	0	0	0	0	1	0	0	0	0	0	0	0	0	0	0	0	0	0	0	0	0	0	0	0	0	0	0	0	0	0	0	0	0	0	0
AC008781.1	ENSG00000228737	0	0	0	0	1	0	0	0	0	0	0	0	0	0	0	0	0	0	0	0	0	0	0	0	0	1	0	1	0	0	0	0	0	0	0	0
AC008781.2	ENSG00000246422	0	0	0	0	1	0	0	0	0	0	0	0	0	0	0	0	1	0	0	1	1	1	0	0	0	0	0	0	0	0	0	0	0	0	0	0
AC008799.2	ENSG00000241059	0	0	1	0	0	0	0	0	0	0	0	0	0	0	0	0	0	0	0	0	0	0	0	0	0	0	0	0	0	0	0	0	0	0	0	0
AC008840.1	ENSG00000250240	0	0	2	1	1	0	0	0	0	0	1	1	5	7	5	3	1	0	1	6	1	2	1	1	0	1	1	2	0	3	0	0	0	0	0	0
AC008870.3	ENSG00000261266	0	0	0	0	0	0	0	0	0	0	0	0	0	1	0	0	1	0	0	0	1	0	0	0	0	0	0	0	0	0	0	0	0	0	0	0
AC008870.4	ENSG00000261723	0	0	0	0	0	0	0	0	0	0	0	0	0	0	0	0	0	0	0	0	0	0	0	1	0	0	0	0	0	0	0	0	0	0	0	0
AC008871.1	ENSG00000250383	0	0	0	0	0	0	0	0	0	0	0	0	0	0	0	0	0	0	0	0	0	0	0	0	0	0	0	1	0	0	0	0	0	0	0	0
AC008875.1	ENSG00000271788	5	9	7	9	8	5	0	0	0	0	4	3	1	2	5	4	4	0	8	8	2	10	10	1	2	6	3	6	1	4	3	0	0	0	0	0
AC008878.1	ENSG00000267952	0	0	0	0	0	0	0	0	0	0	0	0	0	0	0	0	0	0	0	0	0	0	1	0	0	0	0	0	0	0	0	0	0	0	0	0
AC008878.4	ENSG00000269371	0	0	0	0	0	0	0	0	0	0	0	0	0	0	0	0	0	0	0	0	0	0	0	0	0	0	0	0	0	1	0	0	0	0	0	0
AC008883.2	ENSG00000251054	0	0	0	0	0	0	0	0	0	0	0	0	0	0	0	0	0	0	0	0	0	0	0	0	0	0	0	0	0	0	0	0	0	0	0	0
AC008892.1	ENSG00000249236	0	0	0	0	0	0	0	0	0	0	0	0	0	0	0	0	0	0	1	0	0	0	0	0	0	0	0	0	0	0	1	0	0	0	0	0
AC008894.1	ENSG00000267373	0	1	0	0	0	1	0	0	0	0	0	0	0	0	0	0	0	0	0	0	0	0	0	0	0	0	0	0	0	0	0	0	0	0	0	0
AC008894.2	ENSG00000269243	0	1	1	0	0	0	0	0	0	0	0	0	1	0	1	0	1	1	1	2	0	0	1	0	1	1	0	1	1	0	1	0	0	0	0	0
AC008897.2	ENSG00000247372	0	0	0	0	0	0	0	0	0	0	0	0	0	0	0	0	0	0	0	0	0	0	0	0	0	0	0	0	0	0	0	0	0	0	0	0
AC008897.3	ENSG00000271815	4	1	4	4	6	1	0	0	0	0	1	4	4	5	7	3	1	2	0	0	0	0	0	0	0	0	1	1	0	1	0	0	0	0	0	0
AC008906.1	ENSG00000248734	4	4	5	6	9	11	0	0	1	0	4	3	4	5	8	4	4	2	17	9	7	18	20	8	4	9	11	9	8	13	18	0	0	0	1	2
AC008906.2	ENSG00000272109	0	0	2	0	1	0	0	0	0	0	0	0	1	0	0	1	0	0	2	0	0	0	0	0	0	0	0	0	0	1	1	0	0	1	0	0
AC008914.1	ENSG00000262211	0	0	0	0	1	2	0	0	0	0	0	0	0	0	0	1	0	0	2	2	0	2	1	0	0	1	0	0	1	0	0	0	0	0	0	0
AC008915.2	ENSG00000260136	72	80	131	75	104	70	4	6	12	10	18	24	66	57	108	73	51	40	47	80	38	66	57	66	30	54	56	39	34	58	104	4	27	2	3	8
AC008937.1	ENSG00000225230	1	0	0	0	0	0	0	0	0	0	0	0	0	0	0	0	0	0	0	0	0	0	0	0	0	0	0	0	0	0	0	0	0	0	0	0
AC008937.2	ENSG00000237705	0	0	1	1	0	0	0	0	0	0	0	0	0	0	0	0	0	0	0	0	0	0	0	0	0	0	0	1	0	0	0	0	0	0	0	0
AC008937.3	ENSG00000271828	0	1	0	1	0	2	0	0	0	0	0	0	0	0	0	0	0	0	0	1	1	0	0	2	0	0	0	0	1	0	0	0	0	0	0	0
AC008945.1	ENSG00000272234	1	0	0	1	1	0	0	1	0	0	0	0	0	0	0	0	1	0	0	0	0	0	0	1	2	0	3	2	1	2	0	0	0	0	0	0
AC008946.1	ENSG00000267939	5	4	21	12	7	6	0	0	1	2	2	0	6	3	25	26	4	6	0	4	5	9	4	1	1	1	9	5	6	7	2	0	3	0	0	0
AC008957.1	ENSG00000250155	1	1	1	0	0	0	0	0	0	0	0	0	0	0	0	0	0	0	0	0	0	0	0	0	0	0	0	0	0	0	0	0	0	0	0	0
AC008957.2	ENSG00000274441	0	0	0	0	0	0	0	0	0	0	0	0	1	0	0	0	0	0	0	0	0	0	0	0	0	1	0	0	0	0	0	0	0	0	0	0
AC008966.1	ENSG00000247796	22	9	21	13	15	13	0	0	3	1	2	3	3	7	23	5	7	3	20	38	14	30	25	9	21	24	25	27	12	31	46	2	10	2	3	4
AC008966.2	ENSG00000272123	0	1	0	0	0	0	0	1	0	0	0	3	0	0	3	2	1	0	0	0	0	0	1	1	0	0	1	0	1	2	0	0	1	0	0	1
AC008969.1	ENSG00000176593	69	52	62	41	39	36	5	11	4	10	8	13	47	74	75	50	23	27	37	55	13	37	34	23	25	48	64	52	32	37	41	4	15	1	0	3
AC008972.1	ENSG00000271926	1	1	0	1	2	2	0	0	2	0	0	1	1	1	2	2	1	0	1	1	0	0	0	2	0	2	0	0	1	2	1	0	0	0	0	0
AC008972.2	ENSG00000272081	3	1	7	3	5	4	1	0	0	0	1	1	3	3	4	4	2	2	5	3	2	5	1	4	0	2	1	3	3	4	1	0	0	0	0	1
AC008982.1	ENSG00000268083	0	0	0	0	0	0	0	0	0	0	0	0	0	0	0	0	0	0	0	0	0	0	0	0	0	0	1	0	0	0	0	0	0	0	0	0
AC009005.1	ENSG00000267751	28	22	39	16	16	19	1	2	1	3	3	17	6	10	27	10	10	8	16	36	14	24	38	43	3	7	1	6	6	9	10	0	1	1	0	1
AC009021.1	ENSG00000260905	0	0	1	0	0	2	0	0	0	0	0	0	0	0	1	0	0	0	1	0	0	0	0	0	0	0	0	0	1	0	0	0	0	0	1	0
AC009021.2	ENSG00000260973	0	0	0	0	1	0	0	0	0	0	0	0	0	0	0	0	0	0	0	0	0	0	0	0	0	0	0	0	0	0	0	0	0	0	0	0
AC009022.1	ENSG00000196696	15	19	27	11	17	19	1	1	5	4	5	13	9	12	39	26	14	10	33	64	19	24	45	40	8	31	23	23	18	33	50	0	10	1	5	5
AC009034.1	ENSG00000261113	0	0	0	0	0	0	0	0	0	0	0	0	0	0	1	0	0	0	2	0	0	0	0	0	0	1	1	0	0	0	0	0	0	0	0	0
AC009035.1	ENSG00000260580	0	0	0	0	0	0	0	0	0	0	0	0	0	0	0	0	0	0	0	0	0	0	0	0	0	0	1	0	0	0	0	0	0	0	0	0
AC009041.1	ENSG00000260496	0	0	0	0	0	0	0	0	0	0	0	1	0	1	0	0	0	0	0	0	0	0	0	0	0	0	0	0	0	0	0	0	0	0	0	0
AC009041.2	ENSG00000260807	20	11	10	14	11	21	6	4	4	1	6	10	415	432	515	395	188	182	0	1	0	2	0	2	8	6	4	6	20	7	18	1	1	0	1	0
AC009053.2	ENSG00000261079	9	4	11	8	6	7	0	0	2	2	2	2	2	3	4	0	4	1	3	2	0	2	2	8	1	3	4	1	5	5	5	0	3	0	2	2
AC009053.3	ENSG00000261170	1	0	0	0	0	0	0	0	0	0	0	0	0	0	0	0	0	0	0	1	0	0	0	0	0	0	0	0	0	1	0	0	0	0	0	0
AC009060.1	ENSG00000247228	1	0	0	0	0	0	0	0	0	0	0	0	0	0	1	1	1	0	0	0	0	0	0	0	0	1	0	0	1	1	1	0	0	0	0	0
AC009061.2	ENSG00000270049	14	11	19	16	16	13	2	1	1	1	1	9	30	25	43	41	14	17	23	34	17	18	14	25	9	36	23	13	23	26	45	0	7	0	1	4
AC009063.1	ENSG00000259914	0	0	0	0	0	0	0	0	0	0	0	0	0	0	0	0	0	0	0	0	0	0	0	0	0	0	0	0	0	0	0	0	0	0	0	0
AC009063.2	ENSG00000260788	0	0	0	0	1	0	0	0	0	0	0	0	0	0	0	0	0	0	0	0	0	0	0	0	0	0	0	0	0	0	0	0	0	0	0	0
AC009063.3	ENSG00000261103	0	1	0	1	1	0	0	0	0	0	0	0	0	1	0	0	0	0	0	0	1	0	0	0	0	0	0	0	0	0	0	0	0	0	0	0
AC009065.1	ENSG00000259780	0	0	0	0	0	2	0	0	0	0	0	0	0	0	0	1	0	0	0	0	0	0	0	0	1	0	0	0	0	0	0	1	0	0	0	0
AC009065.3	ENSG00000260447	0	0	1	0	0	0	0	0	0	0	0	0	0	0	0	0	0	1	0	0	0	1	0	1	0	0	0	0	0	0	0	0	0	0	0	0
AC009065.4	ENSG00000260778	11	9	20	18	9	8	0	0	0	3	2	7	5	14	14	8	4	9	9	16	7	13	15	12	3	16	21	12	14	12	19	0	3	0	0	3
AC009065.6	ENSG00000261240	1	0	1	0	0	0	0	0	0	0	0	0	0	0	0	0	0	0	0	0	0	0	0	0	0	0	0	0	0	0	0	0	0	0	0	0
AC009065.7	ENSG00000261532	0	0	1	0	2	0	0	0	0	0	0	0	0	0	0	0	0	0	0	0	0	0	0	0	0	0	0	1	0	0	0	0	0	0	0	0
AC009065.8	ENSG00000261663	1	1	2	2	1	1	0	0	0	0	0	0	3	2	1	0	0	0	3	0	0	0	1	1	2	1	0	1	0	3	1	0	0	0	0	0
AC009075.1	ENSG00000261673	0	0	1	1	0	1	0	0	0	0	1	1	0	0	1	1	0	0	1	0	0	0	0	0	0	1	0	0	0	0	0	0	0	0	0	0
AC009087.1	ENSG00000260252	1	0	0	0	0	0	0	0	0	0	0	0	0	1	0	0	0	0	0	0	0	0	0	0	0	1	0	0	0	0	0	0	0	0	0	0
AC009088.1	ENSG00000260060	20	15	38	20	21	24	1	0	0	1	0	3	1	5	10	9	5	4	6	7	7	22	3	12	2	3	4	12	2	7	11	0	2	0	2	1
AC009088.2	ENSG00000260304	0	1	0	0	0	0	0	0	0	0	0	0	0	0	0	0	1	0	0	0	0	0	0	0	0	0	0	1	0	0	0	0	0	0	0	0
AC009090.2	ENSG00000260148	0	0	0	0	0	0	0	0	0	0	0	0	0	0	0	0	0	0	0	0	0	0	0	0	0	0	1	0	0	0	0	0	0	0	0	0
AC009090.3	ENSG00000276663	0	0	0	0	0	0	0	0	0	0	0	0	0	0	0	0	0	0	0	0	0	0	1	0	0	0	0	0	0	0	0	0	0	0	0	0
AC009093.1	ENSG00000259807	0	0	6	1	0	0	0	0	0	0	0	2	0	0	2	1	2	0	0	0	0	1	0	0	0	0	0	0	0	0	23	0	2	0	0	2
AC009093.2	ENSG00000260517	0	0	1	0	0	2	0	0	0	0	0	0	2	2	4	3	0	2	0	0	0	0	0	0	0	1	2	2	0	1	7	0	1	1	1	0
AC009093.4	ENSG00000260953	0	0	0	0	0	0	0	0	0	0	0	0	0	1	0	0	0	0	0	1	0	1	0	1	0	0	0	1	0	0	0	0	0	0	0	0
AC009093.5	ENSG00000273582	0	0	0	0	0	0	0	0	0	0	0	0	0	0	0	1	0	0	0	0	0	0	0	0	0	0	0	1	0	0	2	0	0	0	0	0
AC009093.6	ENSG00000277999	0	0	1	0	0	0	0	0	0	0	0	0	0	0	1	0	0	0	0	0	0	1	0	1	0	0	0	0	0	0	0	0	1	0	0	0
AC009095.1	ENSG00000237718	1	0	0	1	0	0	0	0	0	0	0	0	0	0	0	0	0	0	0	0	0	0	1	0	0	0	1	2	1	0	1	0	0	0	0	0
AC009097.1	ENSG00000260185	0	0	0	0	0	0	0	0	0	0	0	0	0	0	0	0	0	0	0	0	0	0	0	0	0	0	0	0	0	1	0	0	0	0	0	0
AC009097.2	ENSG00000260593	0	0	0	0	0	0	0	0	0	0	0	0	0	0	0	1	1	0	0	0	0	0	0	0	0	0	0	0	0	0	0	0	0	0	0	0
AC009097.3	ENSG00000260612	1	0	0	0	0	0	0	0	0	0	0	0	1	0	1	0	0	0	0	2	0	1	1	1	0	0	0	2	1	0	0	0	0	0	0	0
AC009097.4	ENSG00000261513	0	1	0	0	0	0	0	0	0	0	0	0	0	0	1	0	0	0	0	0	0	0	0	0	0	0	0	0	0	0	0	0	0	0	0	0
AC009102.2	ENSG00000272372	0	0	2	1	0	0	0	0	0	0	0	0	0	0	0	0	0	0	0	0	0	0	0	0	0	0	0	0	0	0	0	0	0	0	0	0
AC009107.2	ENSG00000260927	0	0	0	1	0	1	0	0	0	0	0	0	0	0	0	0	0	0	0	1	0	0	0	0	0	2	0	0	0	1	1	0	0	0	0	0
AC009108.3	ENSG00000270020	4	2	0	1	2	0	0	0	0	0	0	1	0	1	0	0	0	3	0	0	0	0	0	0	0	1	0	0	0	2	0	0	0	0	0	0
AC009110.1	ENSG00000231589	3	0	0	2	0	0	0	0	0	0	0	0	0	0	0	0	0	0	0	0	0	0	0	0	0	0	0	0	0	0	0	0	0	0	0	0
AC009113.1	ENSG00000259877	13	7	12	8	6	6	0	1	2	3	3	9	10	23	25	18	20	7	10	17	9	30	14	12	8	12	14	19	10	15	24	0	5	1	1	0
AC009118.2	ENSG00000276131	4	6	13	8	4	5	0	0	0	0	0	0	5	14	6	4	6	3	9	21	5	10	14	9	8	14	18	15	5	13	20	1	4	2	1	1
AC009118.3	ENSG00000276259	11	4	12	5	6	12	0	0	0	1	0	0	9	6	17	5	6	6	1	4	3	10	4	8	1	11	13	10	5	12	7	0	4	2	0	0
AC009119.2	ENSG00000260300	0	1	3	0	0	1	0	0	0	0	0	0	1	0	1	2	0	0	1	1	0	1	2	0	0	1	0	3	2	1	1	0	0	0	0	0
AC009120.2	ENSG00000259972	37	24	51	35	22	31	3	1	1	6	9	16	21	32	41	24	17	11	21	42	17	27	29	48	10	34	56	66	25	36	43	3	15	1	1	6
AC009120.3	ENSG00000260884	0	1	1	1	0	1	0	0	0	0	0	0	0	2	0	0	0	0	1	0	0	0	0	0	0	0	0	0	1	0	0	0	0	0	0	0
AC009120.4	ENSG00000261248	1	0	2	0	0	1	0	0	0	0	1	0	1	0	1	0	0	0	0	0	0	0	0	0	0	0	0	0	1	0	0	0	0	0	1	1
AC009120.5	ENSG00000275236	1	0	1	0	1	1	0	0	0	0	0	0	1	2	0	3	1	1	0	2	0	0	1	0	0	0	1	2	1	0	1	0	0	0	0	0
AC009121.1	ENSG00000262703	0	0	0	1	0	0	0	0	1	0	0	0	0	0	0	0	0	0	0	0	0	0	0	0	0	0	0	0	0	0	0	0	0	0	0	0
AC009121.2	ENSG00000263080	0	0	0	1	0	0	0	0	0	0	0	0	1	2	2	0	0	0	0	1	0	0	0	0	1	0	1	1	0	0	3	0	0	0	0	0
AC009126.1	ENSG00000247121	8	5	11	2	6	8	1	0	0	1	3	1	4	3	6	8	7	1	3	13	7	14	7	14	1	10	12	7	1	8	9	0	2	0	0	1
AC009133.1	ENSG00000238045	8	11	19	14	8	8	0	0	2	1	3	3	2	5	10	3	4	4	13	25	12	10	21	18	8	22	13	12	26	10	11	1	4	0	2	1
AC009133.2	ENSG00000259952	2	0	1	0	0	0	0	0	0	0	0	0	2	1	0	0	0	1	0	0	1	2	1	0	0	0	0	0	2	0	1	0	0	1	0	1
AC009133.3	ENSG00000260719	2	0	0	2	0	1	0	0	0	0	0	0	0	0	0	0	0	0	2	0	1	0	1	0	0	0	1	0	0	1	0	0	0	0	0	0
AC009133.4	ENSG00000275857	0	2	1	0	0	2	0	0	0	0	0	0	1	0	0	0	0	0	1	1	0	0	2	0	0	0	1	0	0	0	1	0	1	0	0	0
AC009137.1	ENSG00000260999	0	0	0	0	0	0	0	0	0	0	0	0	0	0	0	0	0	0	0	0	0	0	0	0	0	0	0	0	0	0	0	0	0	0	0	0
AC009139.1	ENSG00000260922	0	0	0	0	1	0	0	0	0	0	0	0	0	2	0	0	2	0	0	1	0	0	0	1	0	0	0	1	0	2	0	0	0	0	0	0
AC009142.1	ENSG00000261410	0	0	0	0	0	0	0	0	0	0	0	0	0	0	0	0	0	0	0	0	0	0	0	0	0	0	0	0	0	0	0	0	0	0	0	0
AC009145.3	ENSG00000260694	0	0	0	0	1	0	0	0	0	0	0	0	0	0	0	0	0	0	0	1	0	0	0	0	0	0	0	0	0	0	0	0	0	0	0	0
AC009148.1	ENSG00000260495	2	0	8	3	1	5	0	0	2	0	1	2	1	5	5	2	1	2	0	4	1	1	2	1	2	4	5	5	4	0	0	0	0	0	0	0
AC009154.2	ENSG00000274478	0	0	0	0	0	0	0	0	0	0	0	0	0	0	0	0	0	0	0	0	0	0	0	0	0	0	0	1	0	1	0	0	1	0	0	0
AC009159.2	ENSG00000277214	0	0	0	0	0	0	0	0	0	0	0	0	0	0	1	0	0	1	0	0	0	0	0	0	0	0	0	0	0	0	0	0	0	0	0	0
AC009159.3	ENSG00000278058	0	0	0	0	1	0	0	0	0	0	0	1	1	2	8	0	1	1	0	0	1	0	0	0	0	2	1	1	1	0	0	0	0	0	0	0
AC009163.1	ENSG00000203472	0	0	0	1	1	1	0	0	0	0	0	0	1	0	0	0	0	0	0	0	0	0	0	0	0	0	0	0	0	0	0	0	0	0	0	0
AC009163.4	ENSG00000261717	0	0	0	0	0	1	0	0	0	0	0	0	0	0	0	0	1	0	0	1	0	0	0	0	0	0	0	0	1	0	0	0	0	0	0	0
AC009163.6	ENSG00000273971	0	0	1	0	0	0	0	0	0	0	0	0	0	0	0	0	0	0	0	0	0	0	0	0	0	0	0	0	0	0	0	0	0	0	0	0
AC009163.7	ENSG00000274220	7	1	4	6	5	2	0	0	1	0	1	0	3	3	4	8	2	1	1	4	2	2	2	1	2	2	5	3	2	1	4	0	0	0	0	0
AC009166.1	ENSG00000261238	0	0	0	0	0	0	0	0	0	0	0	0	0	1	0	0	0	0	0	0	0	0	0	0	0	0	0	0	0	0	0	0	0	0	0	0
AC009171.2	ENSG00000263105	2	0	2	1	2	2	1	0	0	0	0	2	8	4	4	7	1	1	2	5	0	2	5	0	3	7	2	0	8	7	24	3	2	0	1	2
AC009226.1	ENSG00000223725	0	0	0	0	0	0	0	0	0	0	0	0	0	0	0	0	0	0	0	1	0	0	0	0	0	0	0	0	0	0	0	0	0	0	0	0
AC009227.1	ENSG00000224675	0	0	0	0	0	0	0	0	0	0	0	0	0	0	0	0	1	0	1	1	0	2	1	1	1	1	1	0	0	1	0	0	0	0	0	0
AC009227.2	ENSG00000238004	0	0	0	1	0	0	0	0	0	0	0	0	0	0	0	0	0	0	0	0	0	0	0	0	0	0	0	0	0	0	0	0	0	0	0	0
AC009228.1	ENSG00000242628	0	0	1	0	0	0	0	0	0	0	0	0	1	0	0	1	0	0	1	0	0	1	0	1	2	3	1	2	3	2	2	0	1	0	0	0
AC009229.1	ENSG00000227292	0	0	0	0	0	0	0	0	0	0	0	0	0	0	0	0	0	0	0	0	0	0	0	0	0	0	0	0	0	0	2	0	0	0	0	0
AC009229.3	ENSG00000273006	1	0	0	0	0	0	0	0	0	0	0	0	0	0	0	0	0	0	0	0	0	0	0	0	0	0	0	0	0	0	0	0	0	0	0	0
AC009237.14	ENSG00000272913	0	0	0	0	0	0	0	0	0	0	0	0	0	0	0	0	0	0	0	0	0	0	1	0	2	7	8	9	1	5	12	1	1	0	1	2
AC009237.15	ENSG00000273305	0	0	0	0	0	0	0	0	0	0	0	0	0	0	0	0	0	0	0	0	0	0	1	0	0	6	0	3	1	4	3	1	0	0	1	0
AC009242.1	ENSG00000283031	5	3	3	1	4	4	0	0	0	0	1	0	2	2	2	3	3	1	0	1	0	0	1	1	0	0	0	0	1	0	0	0	0	0	0	0
AC009262.1	ENSG00000236212	1	1	0	1	0	0	0	0	0	0	0	0	0	1	0	0	0	0	0	0	0	0	0	0	0	0	0	0	0	0	0	0	0	0	0	0
AC009264.1	ENSG00000234352	0	0	0	0	0	0	0	0	0	0	0	0	0	1	0	0	0	0	1	0	0	0	0	0	0	0	0	0	0	0	0	0	0	0	0	0
AC009269.2	ENSG00000259532	1	1	1	0	0	0	0	0	0	0	0	0	0	1	1	1	0	0	2	5	1	1	0	3	1	1	0	0	0	1	2	0	0	0	0	0
AC009269.3	ENSG00000259624	0	0	0	1	0	0	0	0	0	0	0	0	0	0	0	0	0	0	0	1	0	0	0	0	0	0	0	0	0	1	0	0	0	0	0	0
AC009271.1	ENSG00000267327	1	2	1	0	2	3	0	0	1	0	0	0	0	5	1	1	1	0	0	0	0	0	0	0	0	0	0	0	0	0	0	0	0	0	0	0
AC009275.1	ENSG00000273297	11	7	4	4	7	6	0	2	1	1	1	2	2	4	4	2	4	5	10	41	3	5	5	6	21	29	19	17	26	56	141	4	20	2	5	10
AC009276.1	ENSG00000224375	0	0	0	0	0	0	0	0	0	0	0	0	1	0	0	0	0	0	0	0	0	0	0	0	0	0	0	0	0	0	0	0	0	0	0	0
AC009283.1	ENSG00000273576	7	2	8	2	3	5	0	0	1	3	5	4	5	8	11	8	8	1	4	10	2	5	9	13	7	13	11	8	9	11	13	0	4	0	0	2
AC009292.1	ENSG00000245719	1	0	1	0	0	0	0	0	0	0	0	0	0	0	1	1	1	0	0	0	0	0	0	0	0	0	0	0	0	0	0	0	0	0	0	0
AC009299.3	ENSG00000235724	0	0	0	0	0	1	0	0	0	0	0	0	0	0	1	0	0	0	0	0	1	0	0	0	0	0	0	0	0	0	1	0	0	0	0	0
AC009309.1	ENSG00000273080	7	6	5	4	7	7	0	0	0	0	1	1	11	16	3	0	2	9	9	12	3	1	7	14	4	9	2	3	9	14	17	0	3	0	1	0
AC009312.1	ENSG00000238207	0	0	0	0	0	0	0	0	0	0	0	1	0	0	0	0	0	1	0	0	0	0	0	1	0	0	0	0	0	0	0	0	0	0	0	0
AC009313.1	ENSG00000224467	0	0	0	0	0	0	0	0	0	0	0	0	0	0	0	0	0	0	1	0	0	0	0	0	0	0	0	0	0	0	0	0	0	0	0	0
AC009318.1	ENSG00000257176	0	1	1	2	0	0	0	0	0	0	1	2	1	3	1	3	3	1	5	1	3	1	1	1	2	2	2	0	1	0	2	0	0	0	0	0
AC009318.2	ENSG00000273680	1	5	5	1	1	2	0	0	0	0	1	0	4	4	3	3	2	2	1	3	5	2	1	7	0	5	5	3	1	4	3	0	2	1	0	0
AC009318.3	ENSG00000274315	7	6	4	8	4	4	0	1	0	0	1	1	10	6	7	6	6	2	4	10	7	13	18	6	3	8	8	4	7	14	14	0	2	1	0	0
AC009318.4	ENSG00000275476	1	0	0	0	0	0	0	0	0	1	1	1	0	3	1	2	0	1	2	1	0	4	2	2	2	3	2	0	1	2	2	0	0	0	0	1
AC009336.1	ENSG00000272729	0	1	0	0	0	0	0	0	0	0	0	0	1	0	0	0	0	0	0	0	0	0	0	0	0	0	0	0	0	0	0	0	0	0	0	0
AC009336.2	ENSG00000278500	0	1	2	0	0	0	0	0	0	0	0	0	1	0	0	0	0	0	1	0	0	0	0	0	0	0	0	0	0	2	1	0	0	0	0	0
AC009365.1	ENSG00000183470	0	0	0	0	0	0	0	0	0	0	0	0	0	0	0	1	0	0	0	0	0	0	0	0	0	0	0	0	0	0	0	0	0	0	0	0
AC009365.2	ENSG00000225881	0	0	0	0	0	0	0	0	0	0	0	0	0	0	0	0	0	0	0	0	0	0	0	0	1	0	0	0	0	0	0	0	0	0	0	0
AC009403.1	ENSG00000216895	55	46	58	51	44	43	1	3	3	1	15	9	39	44	66	48	29	26	23	40	20	34	20	42	19	33	35	26	26	36	47	1	7	2	0	5
AC009403.2	ENSG00000283128	5	1	1	1	1	2	0	0	0	0	0	0	0	2	0	1	1	0	1	1	1	2	0	2	0	1	1	0	1	0	3	0	0	0	0	0
AC009404.1	ENSG00000236255	21	7	19	13	9	20	1	1	0	1	2	1	11	8	10	10	4	5	4	7	2	3	3	8	2	9	11	3	8	10	17	2	2	1	0	1
AC009414.2	ENSG00000260025	68	73	108	90	155	98	7	4	20	14	64	47	36	32	69	36	57	19	93	175	74	122	167	167	15	25	34	24	42	51	102	1	9	4	1	2
AC009446.1	ENSG00000254277	0	0	0	0	0	0	0	0	0	0	0	0	0	0	0	0	0	0	0	0	0	0	0	0	0	1	0	0	0	0	0	0	0	0	0	0
AC009478.1	ENSG00000225258	0	0	0	0	0	0	0	0	0	0	0	0	0	0	0	0	0	0	0	0	0	0	0	0	0	0	0	0	0	0	1	0	0	0	0	0
AC009480.1	ENSG00000223911	0	0	0	0	0	0	0	0	0	0	0	0	1	0	0	0	0	0	0	0	0	0	1	0	0	0	0	0	0	0	0	0	0	0	0	0
AC009486.1	ENSG00000261117	1	0	1	0	1	0	0	0	0	0	0	0	0	0	0	0	0	0	0	1	0	0	0	0	0	0	0	0	0	0	0	0	0	0	0	0
AC009495.1	ENSG00000229195	0	0	0	0	1	0	0	0	0	0	0	0	0	0	0	0	0	0	0	0	0	0	0	0	0	0	0	0	0	0	0	0	0	0	0	0
AC009495.2	ENSG00000232411	1	0	0	0	0	0	0	0	0	0	0	0	0	0	0	0	0	0	0	0	0	0	0	0	0	0	0	0	0	1	0	0	0	0	0	0
AC009495.3	ENSG00000235192	0	0	0	0	0	0	0	0	0	0	0	0	1	0	0	0	0	0	1	0	0	0	0	0	0	0	0	0	1	0	1	0	0	0	0	0
AC009501.1	ENSG00000231609	7	4	6	3	0	5	0	1	0	0	2	3	3	4	5	5	5	5	2	3	1	1	10	4	0	1	5	6	4	5	6	2	1	1	0	0
AC009502.1	ENSG00000227308	4	10	10	4	9	9	0	0	0	0	4	1	1	6	8	4	4	2	0	0	0	1	1	1	0	0	0	0	0	0	2	0	0	0	0	0
AC009506.1	ENSG00000224152	13	6	15	6	3	16	1	2	1	1	1	7	10	15	16	14	12	8	6	9	1	6	7	9	3	9	8	6	10	16	15	0	2	0	0	0
AC009509.1	ENSG00000256377	0	1	0	0	0	0	0	0	0	0	0	0	0	0	0	0	0	0	0	0	0	0	0	0	0	0	0	0	0	0	0	0	0	0	0	0
AC009509.2	ENSG00000256504	0	0	1	1	0	0	0	0	0	0	0	0	0	0	1	0	0	0	0	0	0	0	0	0	0	0	0	0	0	0	0	0	0	0	0	0
AC009509.4	ENSG00000276261	4	4	7	4	7	2	0	0	0	0	1	0	9	2	3	8	4	3	4	6	1	6	1	4	3	7	0	4	6	8	7	1	1	0	1	0
AC009511.2	ENSG00000256747	0	0	0	0	0	0	0	0	0	0	0	0	0	0	0	0	0	0	0	0	0	0	0	0	0	0	0	0	0	1	0	0	0	0	0	0
AC009549.1	ENSG00000270607	2	1	1	3	1	1	0	0	0	0	1	2	4	2	2	1	0	0	6	11	4	19	12	14	3	6	9	9	4	13	12	1	4	1	0	2
AC009554.1	ENSG00000259564	0	0	0	0	0	0	0	0	0	0	0	1	0	0	0	0	0	0	0	0	0	0	0	0	0	0	0	0	0	0	0	0	0	0	0	0
AC009560.1	ENSG00000273958	0	0	1	1	0	2	0	0	0	0	1	0	0	2	0	1	0	0	0	2	0	0	0	0	0	9	7	4	3	2	6	1	1	0	1	0
AC009570.1	ENSG00000272986	4	7	8	2	2	5	0	0	1	0	1	0	3	9	6	7	2	1	2	4	0	3	4	5	1	9	5	6	9	9	6	0	1	0	0	0
AC009623.1	ENSG00000253100	0	0	0	0	0	0	0	0	0	0	0	0	0	0	0	0	0	0	0	0	0	0	0	0	0	0	0	0	0	0	0	0	0	0	0	0
AC009630.1	ENSG00000253133	0	1	1	0	0	1	0	0	0	0	0	0	0	0	0	1	3	0	0	2	0	3	1	0	0	0	0	0	0	1	1	0	0	0	0	0
AC009630.2	ENSG00000253174	5	0	3	2	1	0	0	0	1	0	0	2	0	1	0	1	0	0	4	1	2	0	1	2	0	0	1	2	0	0	1	0	2	0	0	0
AC009630.3	ENSG00000264578	0	0	0	0	0	0	0	0	0	0	0	0	0	0	0	0	0	0	0	0	0	0	1	0	0	0	0	0	0	0	0	0	0	0	0	0
AC009652.1	ENSG00000255160	0	0	0	0	0	0	0	0	0	0	0	0	0	0	1	0	0	0	0	0	0	0	0	0	0	0	0	0	0	0	0	0	0	0	0	0
AC009652.2	ENSG00000255308	0	0	0	0	0	0	0	0	0	0	0	0	1	0	0	0	0	0	0	0	0	0	0	0	0	0	0	0	0	0	0	0	0	0	0	0
AC009654.1	ENSG00000259223	1	0	0	0	0	0	0	0	0	0	0	0	0	0	0	0	0	0	0	0	0	0	0	0	0	0	0	0	0	0	0	0	0	0	0	0
AC009690.1	ENSG00000260729	0	0	0	0	0	0	0	0	0	0	0	0	0	0	1	0	0	0	0	0	0	0	0	0	0	0	0	0	0	0	0	0	0	0	0	0
AC009690.2	ENSG00000261460	1	0	0	0	0	0	0	0	0	0	0	1	0	0	1	1	0	0	0	0	0	0	0	0	0	1	0	1	0	1	0	0	0	0	0	0
AC009720.1	ENSG00000246640	0	0	0	1	0	0	0	0	0	0	0	0	1	0	2	0	0	0	1	1	2	0	3	0	0	0	1	0	0	0	0	0	0	0	0	0
AC009779.2	ENSG00000258056	27	25	36	18	20	13	1	2	4	0	6	9	42	38	52	47	25	15	18	35	11	24	41	21	19	27	31	23	30	38	39	3	13	0	2	5
AC009779.3	ENSG00000258311	2	1	1	0	0	1	0	0	0	0	0	0	1	2	0	2	0	3	0	1	1	2	0	1	2	4	6	5	4	4	2	0	0	0	0	0
AC009802.1	ENSG00000283667	5	3	4	5	2	1	1	0	0	0	2	1	17	3	12	13	2	3	1	1	0	2	0	1	0	0	0	0	0	0	2	0	0	0	0	0
AC009803.1	ENSG00000257407	0	1	0	0	0	0	0	0	0	0	0	0	0	0	0	0	0	0	0	0	0	0	0	0	0	0	0	0	0	0	0	0	0	0	0	0
AC009804.2	ENSG00000283459	0	0	0	0	0	0	0	0	0	1	0	0	0	0	0	0	0	0	0	0	0	0	0	0	0	0	0	0	0	0	0	0	1	0	0	0
AC009806.1	ENSG00000254847	0	0	1	0	0	0	0	0	0	0	0	0	0	0	0	0	0	0	0	0	0	0	0	0	0	0	0	0	0	0	0	0	0	0	0	0
AC009812.1	ENSG00000251867	10	12	10	5	5	12	1	1	1	2	1	2	6	13	13	14	8	5	4	1	4	2	0	5	2	8	2	1	5	5	6	0	0	0	0	0
AC009812.3	ENSG00000254162	1	1	2	1	4	1	0	0	0	0	0	2	0	3	4	1	0	0	1	3	0	2	2	3	1	1	3	0	1	0	1	0	0	0	0	0
AC009812.4	ENSG00000260317	4	3	11	7	13	6	0	1	0	1	2	4	8	5	14	20	7	4	3	5	6	2	5	3	1	5	5	4	4	2	6	0	0	0	0	0
AC009831.1	ENSG00000263823	2	2	6	3	1	3	0	0	0	1	1	1	7	8	12	10	3	9	1	7	4	4	0	3	2	2	0	1	1	1	2	0	0	0	0	1
AC009884.1	ENSG00000253335	0	0	0	0	0	1	0	0	0	0	0	0	0	0	0	0	0	0	0	0	1	0	1	0	0	0	1	0	0	0	0	0	0	0	0	0
AC009902.2	ENSG00000254027	1	1	1	1	0	1	0	0	1	0	0	0	1	0	1	1	0	0	2	0	0	0	2	4	1	2	0	2	0	0	2	0	0	0	0	1
AC009902.3	ENSG00000272425	0	1	0	0	1	0	0	0	0	0	0	0	0	1	0	1	2	0	1	0	1	0	0	0	0	1	2	2	0	1	1	0	0	0	0	0
AC009908.1	ENSG00000253513	0	0	0	0	0	0	0	0	0	0	0	0	1	0	0	1	0	0	0	0	0	0	0	0	0	0	0	0	0	0	0	0	0	0	0	0
AC009948.1	ENSG00000223960	51	44	63	51	50	39	2	5	6	2	10	17	62	83	111	73	52	39	44	70	33	54	55	61	29	74	89	67	72	103	54	2	21	7	4	9
AC009948.3	ENSG00000270277	7	6	12	9	7	2	0	0	1	1	3	4	18	22	27	5	3	3	2	6	1	7	1	1	2	6	8	3	4	6	3	1	1	1	0	0
AC009948.4	ENSG00000270956	6	1	10	4	2	2	1	0	1	1	0	1	1	2	0	3	2	0	2	3	6	5	5	2	2	1	1	5	2	8	4	0	0	0	0	0
AC009950.1	ENSG00000225963	0	0	1	0	0	1	0	0	0	0	0	0	0	0	0	0	0	0	1	1	0	0	1	0	0	0	0	0	0	0	1	0	0	0	0	0
AC009955.2	ENSG00000267919	2	0	5	2	2	0	0	0	0	0	2	1	2	2	1	0	1	2	0	0	0	0	1	1	0	1	0	0	0	0	0	0	0	0	0	0
AC009955.3	ENSG00000268896	0	1	0	0	0	0	0	0	0	0	0	0	9	6	15	9	0	10	1	1	0	0	0	0	0	0	2	1	0	0	0	0	0	0	0	0
AC009955.4	ENSG00000269068	3	2	1	5	2	1	0	0	0	0	0	0	1	1	3	4	0	0	0	0	0	0	0	1	0	0	3	3	1	2	1	0	0	0	0	0
AC009961.1	ENSG00000226266	7	6	10	9	8	18	1	1	1	3	2	4	7	6	6	5	10	3	11	18	9	6	24	23	3	5	12	10	3	15	6	0	2	0	1	1
AC009962.1	ENSG00000260742	5	3	11	7	3	6	1	1	1	1	1	1	1	1	11	5	3	2	5	10	4	6	5	11	1	1	0	1	0	3	2	0	0	0	0	0
AC009974.1	ENSG00000272555	2	0	0	0	0	0	0	0	0	0	0	0	3	1	3	0	0	0	0	0	1	0	0	0	0	0	0	0	0	0	0	0	0	0	0	0
AC009975.2	ENSG00000282998	0	0	0	0	0	0	0	0	0	0	0	0	0	0	1	0	0	0	0	0	0	0	0	0	1	1	0	0	0	0	0	0	0	0	0	0
AC010082.1	ENSG00000225000	0	0	0	0	0	0	0	0	0	0	0	0	0	0	0	0	0	0	1	0	0	0	0	0	0	0	0	0	0	0	0	0	0	0	0	0
AC010096.1	ENSG00000234597	0	0	1	0	1	0	0	0	0	0	0	0	0	0	1	0	0	0	0	1	0	0	0	0	0	1	2	1	1	1	0	0	0	0	0	0
AC010127.1	ENSG00000236107	0	0	0	0	0	0	0	0	0	0	0	0	0	0	0	0	0	0	0	0	0	1	0	1	0	0	0	0	1	3	1	0	0	0	0	0
AC010132.4	ENSG00000261019	0	2	0	1	0	0	0	0	0	0	0	0	1	0	2	1	0	0	1	0	0	0	2	0	1	2	0	2	0	2	0	0	0	0	0	0
AC010136.1	ENSG00000223923	1	1	3	2	1	1	0	0	0	0	0	0	0	5	2	1	0	2	1	2	1	2	2	2	0	1	0	1	0	0	0	0	0	0	0	0
AC010148.1	ENSG00000235726	3	1	3	4	0	1	0	0	0	0	0	0	0	0	1	2	1	0	0	0	1	0	0	0	0	0	0	0	0	0	0	0	0	0	0	0
AC010163.1	ENSG00000229543	0	0	3	0	0	0	0	0	0	0	0	0	0	0	0	0	0	1	0	0	0	0	0	0	0	2	1	0	1	2	0	0	0	0	0	0
AC010163.2	ENSG00000230229	0	0	0	0	0	0	0	0	0	0	0	0	0	0	0	0	0	0	0	0	0	0	0	0	0	1	0	0	0	0	0	0	0	0	0	0
AC010168.1	ENSG00000214772	0	0	0	0	0	0	0	0	0	0	0	0	0	0	0	0	0	0	0	0	0	0	0	0	0	0	0	1	0	0	0	0	0	0	0	0
AC010173.1	ENSG00000258101	5	3	8	6	2	2	0	0	0	1	1	0	3	9	11	9	2	3	8	9	6	12	6	9	7	8	12	5	5	18	13	0	3	0	0	0
AC010175.1	ENSG00000256427	1	0	1	1	0	0	0	0	0	0	0	0	0	0	0	0	0	0	0	0	0	0	0	0	0	0	0	0	0	0	0	0	0	0	0	0
AC010186.1	ENSG00000256442	1	0	2	1	0	1	0	1	0	0	0	1	0	0	1	1	0	1	0	0	0	0	0	0	0	1	1	0	1	0	1	0	0	0	0	0
AC010197.1	ENSG00000256615	0	0	1	0	0	0	0	0	0	0	0	0	0	0	0	0	0	0	0	0	0	0	0	0	0	1	0	0	0	0	0	0	0	0	0	0
AC010198.1	ENSG00000246331	0	0	0	0	0	0	0	0	0	0	0	0	0	0	0	0	0	0	0	0	0	0	0	0	0	0	1	0	0	1	0	0	0	1	0	0
AC010201.1	ENSG00000271259	0	1	2	0	0	1	0	0	1	0	1	0	3	3	6	6	3	2	1	0	0	0	2	1	1	3	2	2	1	0	2	0	1	0	0	1
AC010201.2	ENSG00000271327	0	0	4	0	2	2	0	0	0	0	1	1	4	6	10	5	2	0	2	1	0	1	1	3	0	2	2	1	0	5	0	0	0	0	0	0
AC010203.2	ENSG00000257696	0	0	0	0	0	0	0	0	0	0	0	0	0	0	0	0	0	0	0	0	0	0	1	0	0	0	0	0	0	0	1	0	0	0	0	0
AC010205.1	ENSG00000274560	1	0	0	0	0	0	0	0	0	0	0	0	0	0	2	0	0	0	0	0	0	0	0	0	0	0	0	0	0	0	0	0	0	0	0	0
AC010207.1	ENSG00000260633	4	1	5	5	3	5	0	0	0	0	0	0	2	3	2	2	1	3	1	0	0	2	1	3	1	1	0	0	1	1	3	0	2	1	0	0
AC010210.1	ENSG00000250608	0	1	0	0	0	1	0	0	0	0	0	0	1	0	1	0	0	0	0	0	0	0	0	0	0	0	1	0	0	0	2	0	0	0	0	0
AC010226.1	ENSG00000249249	8	2	1	2	3	9	1	0	1	1	0	2	3	3	5	1	2	4	1	7	2	2	4	2	4	6	5	4	5	5	7	0	2	0	2	0
AC010230.1	ENSG00000246316	0	0	0	0	0	0	0	0	0	0	0	0	0	0	1	1	0	0	0	0	0	0	0	0	0	0	0	0	0	0	0	0	0	0	0	0
AC010235.1	ENSG00000248752	0	0	0	0	0	0	0	0	0	0	0	0	0	1	1	1	0	0	0	0	0	0	0	0	0	0	0	0	0	0	0	0	0	0	0	0
AC010240.3	ENSG00000272023	1	0	0	0	0	0	1	0	1	0	0	0	3	0	1	0	2	0	1	1	0	0	0	0	0	0	2	1	0	0	1	0	0	0	0	0
AC010245.1	ENSG00000248881	0	1	2	3	0	0	0	0	0	0	0	1	1	0	2	0	0	1	1	3	0	1	2	3	0	0	1	2	0	0	1	0	0	0	0	0
AC010245.2	ENSG00000272040	2	3	5	6	0	8	0	0	1	0	1	1	1	3	4	4	2	2	6	9	3	4	3	5	1	6	3	4	4	5	6	1	3	0	0	1
AC010247.1	ENSG00000254887	2	0	7	4	7	8	0	1	3	4	5	1	0	0	2	0	1	0	3	3	1	2	2	1	1	0	1	1	1	2	1	0	1	0	0	0
AC010247.2	ENSG00000259436	1	0	0	0	2	2	0	0	1	0	0	0	0	0	0	0	0	0	1	0	0	0	1	0	0	0	0	0	0	0	0	0	0	0	0	0
AC010255.1	ENSG00000247311	1	0	0	1	1	3	0	0	0	0	0	0	0	0	1	0	0	1	1	1	1	2	2	0	1	0	1	1	0	0	0	0	0	0	0	0
AC010255.3	ENSG00000250803	0	0	0	1	0	0	0	0	0	0	0	0	0	0	0	0	0	0	0	0	0	1	0	0	0	0	0	0	1	0	0	0	0	0	1	1
AC010271.1	ENSG00000268366	0	0	0	0	1	0	0	0	0	0	0	0	0	0	0	0	0	0	0	0	0	0	0	0	0	0	0	0	0	0	0	0	0	0	0	0
AC010271.2	ENSG00000277453	2	2	2	1	1	0	0	0	0	0	0	0	1	1	2	2	0	0	0	1	0	2	1	2	1	0	0	1	0	1	0	0	0	0	0	0
AC010273.1	ENSG00000248664	1	2	0	2	1	1	0	0	1	0	0	0	2	1	4	1	0	1	1	4	2	2	3	5	1	2	1	6	1	6	2	1	1	0	1	2
AC010273.2	ENSG00000250237	0	1	0	0	0	0	0	0	0	0	0	0	1	0	0	0	0	0	0	0	0	0	0	0	0	0	0	1	1	1	0	0	0	0	0	0
AC010275.1	ENSG00000248268	0	0	1	0	0	0	0	0	0	0	0	0	0	0	0	0	0	0	0	0	0	0	0	0	0	0	0	0	0	0	0	0	0	0	0	0
AC010280.2	ENSG00000248884	0	1	0	0	0	1	0	0	0	0	0	0	0	0	0	1	0	0	0	0	0	0	0	1	0	0	0	0	0	0	0	0	0	1	0	0
AC010300.1	ENSG00000267934	1	0	0	0	0	1	0	0	0	0	0	0	2	0	0	1	0	0	0	0	0	1	0	0	0	0	0	0	0	0	0	0	0	0	0	0
AC010307.3	ENSG00000249478	0	0	0	0	0	0	0	0	0	0	0	0	0	0	0	0	0	0	0	0	0	0	1	0	0	0	1	0	0	0	0	0	0	0	0	0
AC010307.4	ENSG00000250244	0	0	0	0	0	0	0	0	0	0	0	0	1	0	0	0	0	0	0	0	0	0	0	0	0	0	0	0	0	0	0	0	0	0	0	0
AC010319.3	ENSG00000269053	1	1	5	3	1	0	0	0	0	0	0	0	1	0	0	2	0	0	0	1	0	0	0	0	0	1	0	0	0	0	2	0	0	0	0	0
AC010319.4	ENSG00000269481	1	1	3	1	0	1	0	0	0	1	0	1	0	4	2	0	2	1	1	1	0	2	3	2	1	2	1	2	0	1	1	0	0	0	0	0
AC010320.1	ENSG00000267927	0	0	1	0	0	2	0	0	0	0	0	0	0	1	1	0	0	0	0	0	0	1	2	0	1	0	0	0	0	2	1	0	0	0	0	0
AC010320.2	ENSG00000268015	1	1	1	0	0	0	0	0	0	0	0	1	1	0	0	0	0	1	0	1	0	0	0	0	0	0	0	0	0	0	0	0	0	0	0	0
AC010320.3	ENSG00000269102	1	0	0	0	0	0	0	0	0	0	0	0	0	0	0	0	0	0	0	0	0	1	0	0	0	0	0	0	0	1	0	0	1	0	0	0
AC010323.1	ENSG00000167774	0	1	1	0	0	0	0	0	0	0	0	0	0	0	0	0	0	0	0	0	0	0	1	1	0	0	0	0	0	0	0	0	0	0	0	0
AC010325.1	ENSG00000261341	4	2	7	1	3	6	0	0	0	0	0	0	2	2	2	3	2	3	0	4	2	4	0	8	0	1	0	2	2	3	1	0	1	0	0	1
AC010325.2	ENSG00000268375	3	4	0	2	1	2	0	0	0	0	0	0	2	2	0	1	1	1	0	0	0	0	2	0	0	0	1	0	0	1	0	0	0	0	0	0
AC010327.3	ENSG00000267577	0	0	0	1	3	0	0	0	0	0	1	0	2	1	0	0	0	0	22	62	16	52	23	23	17	13	40	26	14	20	134	5	32	9	4	11
AC010327.4	ENSG00000267649	0	2	1	0	0	0	0	0	0	0	0	0	2	1	1	1	0	0	0	0	0	0	0	0	0	0	0	0	0	0	0	0	0	0	0	0
AC010327.5	ENSG00000276570	0	0	1	1	3	1	0	0	0	0	0	3	0	0	0	0	0	2	2	0	1	1	2	1	0	4	1	1	1	4	2	0	0	0	0	1
AC010328.1	ENSG00000267943	0	0	0	0	0	1	0	0	0	0	0	0	0	0	1	0	0	0	0	0	0	0	0	0	0	0	1	0	0	0	0	0	0	0	0	0
AC010328.3	ENSG00000269082	0	0	3	3	2	1	0	0	0	0	2	0	0	0	0	0	0	1	0	1	0	0	1	0	0	0	0	0	0	0	0	0	0	0	0	0
AC010329.1	ENSG00000268416	0	0	0	0	0	0	0	0	0	0	0	0	0	0	0	0	0	0	0	0	0	0	0	0	0	0	0	1	0	0	0	0	0	0	0	0
AC010331.1	ENSG00000277383	13	15	19	14	11	11	0	1	2	1	2	6	9	17	13	5	6	6	11	19	4	16	12	20	8	18	10	5	8	16	15	1	2	0	0	0
AC010333.1	ENSG00000259876	0	0	0	0	0	1	0	0	0	0	0	0	1	1	0	0	0	0	0	0	0	0	0	0	0	0	1	0	0	0	0	0	0	0	0	0
AC010333.2	ENSG00000259899	0	0	0	0	0	0	0	0	0	0	0	0	0	0	0	0	0	0	0	0	0	0	0	1	0	0	0	0	0	0	0	0	0	0	0	0
AC010333.3	ENSG00000274834	0	0	0	0	0	0	0	0	0	0	0	1	1	0	0	0	0	1	0	0	0	0	0	0	0	0	0	0	1	0	0	0	0	0	0	0
AC010336.1	ENSG00000214248	11	1	7	2	3	8	0	0	0	0	0	2	5	4	9	6	1	2	0	3	0	7	3	4	1	4	3	8	4	1	8	1	0	0	0	0
AC010336.2	ENSG00000260500	0	0	0	0	0	0	0	0	0	0	0	0	0	0	0	0	0	0	0	0	0	0	0	1	0	0	0	0	0	0	1	0	0	0	0	0
AC010336.3	ENSG00000268120	1	0	0	0	0	0	0	0	0	0	0	0	0	1	1	0	0	0	0	0	0	0	0	0	0	0	0	0	0	0	0	0	0	0	0	0
AC010336.5	ENSG00000269139	3	3	3	5	3	2	0	0	1	0	0	1	6	10	6	3	3	3	2	2	0	1	0	1	0	1	0	0	0	0	0	0	0	0	0	0
AC010336.6	ENSG00000269813	0	2	3	2	0	2	0	0	1	1	0	0	0	2	3	3	0	1	0	1	1	0	2	0	0	0	0	0	1	0	0	0	0	0	0	0
AC010343.3	ENSG00000250697	0	0	0	0	0	0	0	0	0	0	1	0	0	0	0	0	0	1	11	31	9	25	15	6	4	4	5	8	0	20	49	2	18	3	1	4
AC010359.1	ENSG00000269961	3	3	5	2	1	2	0	0	0	0	2	1	4	6	2	2	0	0	0	4	3	2	4	0	0	2	0	1	4	3	2	0	0	0	0	0
AC010401.1	ENSG00000262732	0	2	1	2	0	0	0	0	0	0	0	0	1	0	1	0	1	1	1	1	1	0	2	1	1	0	0	1	0	0	0	0	0	0	0	0
AC010401.2	ENSG00000263234	0	0	0	0	0	0	0	0	0	0	0	0	0	0	0	0	0	0	0	0	0	0	0	0	0	0	0	0	0	0	1	0	0	0	0	0
AC010406.1	ENSG00000250567	0	0	0	0	0	0	0	0	0	0	0	0	0	0	0	0	0	0	0	0	0	1	0	0	0	0	0	0	0	0	1	0	0	0	0	0
AC010420.1	ENSG00000251206	0	0	0	0	0	0	0	0	0	0	0	0	1	0	0	0	0	0	0	0	0	0	0	0	0	0	0	0	0	0	0	0	0	0	0	0
AC010422.2	ENSG00000268945	9	5	9	21	9	11	1	0	0	0	1	0	1	4	1	6	1	1	8	2	0	5	7	5	0	3	6	4	0	5	2	0	1	1	0	0
AC010422.3	ENSG00000269242	0	0	0	2	0	1	0	0	0	0	0	0	0	0	0	0	0	0	0	0	0	0	0	0	0	0	0	0	0	0	0	0	0	0	0	0
AC010422.6	ENSG00000269693	1	0	1	0	0	0	0	0	0	0	0	0	0	0	0	0	0	0	0	0	0	0	0	0	0	0	1	0	0	0	0	0	0	0	0	0
AC010424.2	ENSG00000271766	0	0	0	0	0	0	0	0	0	0	0	0	5	5	5	4	0	1	0	0	0	0	0	0	0	0	0	1	1	0	0	0	0	0	0	0
AC010457.1	ENSG00000251257	1	3	12	6	12	2	0	1	2	4	15	7	58	207	160	154	56	41	13	53	14	27	24	30	7	14	17	7	10	12	7	0	4	1	2	1
AC010478.1	ENSG00000259663	0	2	3	7	2	4	0	0	1	0	1	5	0	2	1	2	0	2	0	2	0	0	5	1	0	1	0	0	0	0	0	0	0	0	0	0
AC010486.1	ENSG00000248667	0	0	0	0	0	0	0	0	0	0	0	0	0	0	0	0	0	0	0	0	0	0	0	0	0	0	0	0	0	0	0	0	0	0	0	0
AC010486.3	ENSG00000249842	1	0	0	0	0	0	0	0	0	0	0	0	0	0	0	0	0	0	0	0	0	0	0	0	0	0	0	0	0	0	0	0	0	0	0	0
AC010487.2	ENSG00000269646	0	1	1	0	0	1	0	0	0	0	0	0	0	1	0	0	1	2	0	0	1	1	1	1	0	4	1	0	2	0	5	0	1	0	0	0
AC010491.1	ENSG00000261360	2	2	6	2	0	4	0	1	0	0	1	2	0	2	3	2	0	1	2	5	0	2	2	1	0	6	4	2	1	2	9	0	2	0	0	1
AC010501.1	ENSG00000271714	1	0	1	1	1	2	0	0	1	0	0	1	0	0	1	0	0	0	1	1	0	0	0	0	0	2	0	0	0	0	0	0	0	0	0	0
AC010503.4	ENSG00000275234	0	0	0	1	0	0	0	0	0	0	0	0	0	0	0	0	0	0	0	0	0	0	0	0	0	0	0	0	0	0	0	0	0	0	0	0
AC010504.1	ENSG00000267219	0	0	0	0	1	0	0	0	0	0	0	0	0	0	0	0	0	0	0	0	0	0	0	1	0	0	0	0	0	0	0	0	1	0	0	0
AC010511.1	ENSG00000267509	4	1	7	4	7	4	0	0	0	0	2	0	0	2	1	3	0	1	2	0	3	4	0	1	0	0	0	0	0	0	0	0	0	0	0	0
AC010519.1	ENSG00000268746	0	1	0	1	0	3	0	0	0	0	0	0	0	0	0	0	1	0	1	1	0	1	0	2	0	1	0	0	1	1	1	0	0	0	0	0
AC010522.1	ENSG00000268750	0	0	1	0	0	0	0	0	0	0	0	1	0	1	0	0	0	0	0	0	0	1	0	1	0	0	0	0	0	0	0	0	0	0	0	0
AC010524.1	ENSG00000268157	14	15	19	17	13	17	1	0	0	0	1	10	11	8	25	8	13	8	14	7	1	7	11	15	1	3	2	5	5	4	3	0	2	0	0	0
AC010525.1	ENSG00000267117	0	0	1	0	0	1	0	0	0	0	0	0	3	1	1	0	0	0	1	0	0	1	0	0	0	0	0	0	0	0	2	0	0	0	0	0
AC010531.3	ENSG00000261592	0	0	0	0	0	0	0	0	0	0	0	0	0	0	0	0	0	0	0	0	0	0	1	0	0	0	0	0	0	0	0	0	0	0	0	0
AC010531.5	ENSG00000269901	0	0	0	0	0	0	0	0	0	0	0	0	0	0	0	0	0	0	0	1	0	0	0	0	0	0	0	0	0	0	0	0	0	0	0	0
AC010531.6	ENSG00000270006	16	15	23	12	5	15	1	1	2	2	10	6	10	16	14	17	11	12	6	14	8	13	8	9	6	10	7	2	9	14	13	0	1	0	0	1
AC010536.1	ENSG00000226180	5	4	2	2	2	2	0	0	1	0	1	0	5	1	8	1	0	1	1	3	3	1	1	1	1	0	1	2	0	1	2	0	0	0	0	0
AC010536.3	ENSG00000277504	1	0	1	4	1	3	0	0	0	0	0	0	1	2	1	1	0	0	0	1	0	0	0	0	1	0	1	0	0	0	0	0	0	0	0	0
AC010538.1	ENSG00000275734	1	2	6	0	1	2	1	0	0	0	0	0	2	1	2	1	1	1	1	0	2	1	3	2	0	1	1	2	2	0	1	0	1	0	0	0
AC010542.1	ENSG00000260650	0	0	0	0	0	0	0	0	0	0	0	0	0	1	0	0	0	0	0	0	0	0	0	0	0	0	0	0	0	0	0	0	0	0	0	0
AC010542.2	ENSG00000260755	1	0	1	2	0	0	1	1	0	0	0	0	0	1	0	2	0	0	2	3	2	3	2	1	4	8	4	5	2	9	9	0	5	0	0	0
AC010542.4	ENSG00000261519	8	8	3	5	1	5	0	0	0	0	0	1	1	1	9	1	2	2	3	2	1	2	1	6	1	2	3	1	0	1	4	0	7	0	1	0
AC010542.5	ENSG00000277978	1	0	0	0	0	0	0	0	0	0	0	0	0	0	0	1	1	0	0	2	0	0	0	0	1	1	3	1	1	1	1	0	0	0	0	0
AC010547.1	ENSG00000247324	0	1	4	0	0	1	0	0	0	0	1	0	0	0	1	0	0	1	2	4	0	0	4	2	0	1	0	9	1	2	3	0	1	0	0	1
AC010547.4	ENSG00000261611	0	0	0	0	1	0	0	0	0	0	0	0	0	0	0	0	0	0	0	0	0	0	0	0	0	0	1	0	1	0	1	0	0	0	0	0
AC010615.2	ENSG00000268119	69	33	67	33	10	58	2	0	0	1	0	6	6	4	12	1	4	3	0	0	0	0	0	2	0	0	0	0	0	0	0	0	0	0	0	0
AC010618.3	ENSG00000269439	24	9	27	27	20	19	3	0	3	2	4	7	29	31	35	27	14	9	24	50	22	45	27	34	13	76	63	66	23	45	89	7	22	4	4	5
AC010624.2	ENSG00000267890	0	0	0	0	0	0	0	0	0	0	0	0	1	0	0	0	0	0	0	0	0	0	0	0	0	0	0	0	0	0	0	0	0	0	0	0
AC010632.1	ENSG00000267345	0	0	0	0	0	0	0	0	0	0	0	0	0	0	0	0	0	0	0	0	0	0	1	0	0	0	0	0	0	1	0	0	0	0	0	0
AC010636.2	ENSG00000269110	0	0	0	0	0	0	0	0	0	0	0	0	0	0	0	1	0	0	0	0	0	0	0	0	0	0	0	0	0	0	0	0	0	0	0	0
AC010638.1	ENSG00000250250	0	0	0	0	0	0	0	0	0	0	0	0	0	0	0	0	0	0	0	0	0	1	0	0	0	0	0	0	0	0	0	0	0	0	0	0
AC010641.1	ENSG00000267443	0	0	0	0	0	0	0	0	0	0	0	0	1	0	0	0	0	0	0	0	0	0	0	0	0	0	0	0	0	0	0	0	0	0	0	0
AC010642.2	ENSG00000283103	343	339	524	367	310	399	29	26	46	43	141	180	416	461	625	437	308	242	303	478	155	306	407	372	128	269	283	276	224	355	345	19	85	13	22	28
AC010643.1	ENSG00000268686	0	0	0	0	0	0	0	0	0	0	1	0	0	0	0	0	0	0	0	0	0	0	0	0	0	0	0	0	0	1	2	0	0	0	0	0
AC010649.1	ENSG00000267448	0	0	0	0	0	0	0	0	0	0	0	0	0	0	0	0	0	0	0	0	0	0	0	0	0	0	0	0	0	1	0	0	0	0	0	0
AC010654.1	ENSG00000277369	4	5	8	4	1	4	0	0	1	1	1	2	7	6	10	8	4	1	2	15	2	7	5	4	3	4	3	2	3	9	9	1	1	0	0	0
AC010655.2	ENSG00000240758	10	14	24	11	8	14	0	0	2	3	2	3	3	3	10	4	7	5	6	11	1	3	5	5	3	9	8	14	5	10	4	1	2	0	1	1
AC010655.4	ENSG00000273184	0	0	3	3	1	0	0	0	0	0	0	0	0	0	1	0	1	0	1	2	0	4	1	4	0	0	0	0	0	2	0	0	0	0	0	0
AC010680.1	ENSG00000267784	0	1	0	0	0	0	0	0	0	0	0	0	13	10	20	5	1	5	0	0	0	0	0	0	1	2	0	0	1	4	2	0	0	0	0	0
AC010680.2	ENSG00000270574	3	6	1	3	5	3	0	0	0	1	2	0	5	3	4	5	0	1	3	7	1	4	3	2	0	1	2	5	4	6	1	0	1	0	0	1
AC010680.3	ENSG00000271011	8	3	10	10	8	4	1	0	0	2	0	0	2	1	1	3	5	0	4	7	2	9	2	4	1	5	12	6	6	9	2	1	0	0	0	1
AC010680.4	ENSG00000271141	5	4	6	0	2	3	0	0	0	0	0	0	2	3	1	2	1	1	0	3	3	3	3	5	2	1	3	2	4	2	3	0	0	1	0	0
AC010680.5	ENSG00000271401	0	2	2	0	0	1	0	0	0	0	0	0	4	4	5	3	1	5	1	0	0	0	0	1	1	0	1	1	0	1	1	0	0	0	0	0
AC010719.1	ENSG00000270933	0	0	0	0	0	0	0	0	0	0	0	0	1	0	0	0	0	0	0	0	0	0	0	0	0	0	0	0	0	0	0	0	0	0	0	0
AC010729.1	ENSG00000236106	3	1	2	2	1	0	1	0	0	1	1	0	0	0	3	0	0	0	0	0	2	0	0	0	0	0	4	0	0	0	0	0	0	0	0	0
AC010735.2	ENSG00000272622	0	0	3	3	1	1	1	0	1	0	2	0	1	4	5	1	2	1	1	3	1	3	0	0	1	8	4	3	2	6	27	0	2	0	0	0
AC010737.1	ENSG00000229308	0	0	0	0	0	0	0	0	0	0	0	0	0	0	0	0	0	0	0	0	0	0	1	1	0	0	0	0	0	0	0	0	0	0	0	0
AC010745.2	ENSG00000228876	0	0	0	0	0	0	0	0	0	0	0	0	0	0	0	0	0	0	0	0	0	0	0	0	1	0	0	0	0	0	0	0	0	0	0	0
AC010745.5	ENSG00000285354	0	0	0	0	0	0	0	0	0	0	0	0	0	0	0	0	0	0	0	0	0	0	0	0	0	0	0	0	0	0	0	0	0	0	0	0
AC010746.1	ENSG00000225979	0	0	0	0	0	0	0	0	0	0	0	0	0	3	0	0	0	0	0	0	0	0	1	0	0	0	0	0	0	0	0	0	0	0	0	0
AC010754.1	ENSG00000265752	0	0	0	0	0	0	0	0	0	0	0	0	0	0	0	0	0	0	0	0	0	0	0	0	0	3	0	1	4	0	0	0	0	0	0	0
AC010761.1	ENSG00000264577	1	3	5	1	1	2	0	0	0	0	0	1	0	2	0	2	1	1	3	4	1	1	0	4	2	2	0	0	2	2	2	0	1	1	0	0
AC010761.2	ENSG00000265073	0	2	0	1	0	0	0	0	0	0	0	0	0	1	1	0	0	0	0	0	0	0	0	0	0	0	0	0	0	0	0	0	0	0	0	0
AC010761.4	ENSG00000265474	0	0	1	0	0	0	0	0	0	0	0	0	1	0	0	3	0	0	1	0	0	0	0	0	0	0	0	1	0	0	0	0	0	0	0	0
AC010761.5	ENSG00000265840	0	0	0	0	0	0	0	0	0	0	0	0	0	0	0	0	0	0	0	0	0	0	0	0	0	0	0	0	0	1	0	0	0	0	0	0
AC010776.1	ENSG00000267269	0	0	0	1	0	0	0	0	0	0	0	0	0	0	0	0	0	0	0	1	0	0	0	0	0	0	0	0	0	0	0	0	0	0	0	0
AC010776.2	ENSG00000267774	0	1	1	2	1	5	0	1	0	0	0	0	0	1	2	0	0	0	7	12	5	14	6	9	5	5	6	7	2	15	16	0	1	1	0	2
AC010776.3	ENSG00000273664	0	1	0	1	0	0	0	0	0	0	0	0	0	0	1	0	0	0	1	2	2	3	1	0	0	0	2	1	1	3	2	0	0	0	0	0
AC010809.1	ENSG00000259287	1	2	2	1	0	1	0	0	0	0	0	0	0	0	0	1	0	1	2	4	3	0	0	1	1	0	2	0	0	0	3	0	1	0	0	0
AC010809.2	ENSG00000259408	11	11	13	16	10	11	0	2	0	0	4	3	7	10	20	15	7	5	8	19	4	5	11	7	2	8	7	6	7	8	5	0	1	0	0	0
AC010809.3	ENSG00000276702	2	0	3	1	1	1	0	0	0	0	0	0	3	1	4	2	1	0	2	2	0	1	1	1	1	2	1	0	0	2	1	0	0	0	0	0
AC010834.1	ENSG00000253722	2	0	0	0	0	0	0	0	0	0	0	0	0	0	1	0	0	0	0	1	0	0	1	0	0	0	0	1	0	0	0	0	0	0	0	0
AC010834.2	ENSG00000253848	3	0	4	1	1	0	0	0	0	0	0	0	0	0	1	0	0	0	1	1	0	0	0	1	0	0	0	0	0	1	0	0	0	0	0	0
AC010834.3	ENSG00000253854	2	0	1	1	2	2	0	0	0	1	0	0	1	0	0	0	0	1	0	0	0	0	0	0	0	0	1	0	1	0	0	0	0	0	0	0
AC010857.1	ENSG00000272479	0	1	1	1	1	1	0	0	0	0	0	0	0	0	0	0	0	0	2	0	2	1	0	0	1	1	1	0	0	0	0	0	0	0	0	0
AC010864.1	ENSG00000273008	9	5	4	4	2	3	1	0	0	2	0	1	5	11	10	10	2	8	1	2	1	2	4	2	1	6	9	7	6	11	7	0	1	0	1	1
AC010880.1	ENSG00000224400	0	1	0	0	0	1	0	0	0	0	0	0	0	0	0	0	0	0	0	0	0	0	0	0	0	0	0	0	0	0	0	0	0	0	0	0
AC010883.1	ENSG00000234936	3	3	6	7	3	5	0	0	0	1	2	3	6	4	9	7	3	1	0	5	0	1	1	3	1	3	3	1	1	2	4	1	1	0	0	0
AC010884.1	ENSG00000224509	3	1	0	1	1	0	0	0	0	0	1	0	0	0	0	0	0	0	0	0	0	0	0	0	0	0	0	1	0	0	0	0	0	0	0	0
AC010889.1	ENSG00000260197	3	0	5	5	1	1	0	0	0	0	1	2	3	0	1	0	2	1	2	0	1	0	0	0	2	0	1	1	0	1	1	0	0	0	0	0
AC010890.1	ENSG00000226953	1	0	0	0	0	0	0	0	0	0	0	0	0	0	0	0	0	0	1	1	0	1	0	1	0	0	0	0	0	0	0	0	0	0	0	0
AC010894.2	ENSG00000226853	5	10	9	7	7	8	1	2	1	1	4	3	11	20	28	23	7	12	3	4	1	3	2	2	3	8	5	4	10	6	11	0	0	2	0	0
AC010894.3	ENSG00000236449	0	0	1	0	0	1	0	0	0	0	0	0	1	2	1	1	2	1	1	1	0	0	0	0	0	0	0	0	1	1	0	0	1	0	0	0
AC010894.4	ENSG00000237798	0	0	0	0	0	0	0	0	0	0	0	0	0	1	0	0	0	0	0	0	0	0	0	0	0	0	0	0	0	0	0	0	0	0	0	0
AC010904.2	ENSG00000272002	2	5	4	3	2	2	0	1	0	0	0	0	0	0	0	0	2	0	1	0	0	0	0	0	0	0	0	0	0	0	1	0	0	0	0	0
AC010907.2	ENSG00000237370	0	0	0	0	0	0	0	0	0	0	0	0	0	0	0	0	0	0	0	0	0	0	0	0	0	0	0	0	0	0	0	0	0	0	0	0
AC010913.1	ENSG00000272702	8	6	8	7	3	5	0	1	1	0	7	1	2	3	8	1	2	1	19	33	9	18	19	26	9	24	25	26	23	24	32	0	0	0	0	3
AC010931.2	ENSG00000248540	7	1	3	2	2	0	0	0	0	0	0	1	0	0	1	0	0	0	0	7	0	1	0	1	0	17	4	16	14	29	1	0	2	0	0	2
AC010931.3	ENSG00000261543	0	0	0	0	0	0	0	0	0	0	0	0	0	0	0	0	0	0	0	0	0	1	0	0	2	4	2	1	0	0	0	0	1	0	0	0
AC010967.1	ENSG00000228033	0	0	0	0	0	0	0	0	0	0	0	0	0	0	0	0	0	1	0	0	0	0	0	0	0	0	0	0	0	0	0	0	0	0	0	0
AC010969.2	ENSG00000269973	41	34	58	37	31	38	2	0	4	5	11	8	14	18	20	23	15	9	33	38	23	29	63	44	18	39	47	31	33	38	49	5	19	0	4	4
AC010973.1	ENSG00000243433	0	0	0	0	0	0	0	0	0	0	0	0	0	0	0	1	0	0	0	0	0	0	0	0	0	0	0	0	0	0	0	0	0	1	0	0
AC010973.2	ENSG00000244151	0	0	0	2	0	0	0	0	0	0	0	1	1	0	3	0	0	0	0	0	0	0	3	1	0	0	1	2	0	0	0	0	1	0	0	0
AC010974.1	ENSG00000230065	0	0	0	0	0	0	0	0	0	0	0	0	0	1	0	0	0	0	0	2	0	0	1	0	0	0	0	0	0	0	0	0	0	0	0	0
AC010976.1	ENSG00000231731	0	1	3	0	0	0	0	0	0	0	0	0	0	0	0	0	0	0	0	0	1	1	0	1	0	0	0	1	0	0	0	0	0	0	0	0
AC010976.2	ENSG00000272789	0	0	1	0	0	0	0	0	0	0	0	0	2	4	6	1	2	2	0	0	0	0	0	0	0	0	0	1	0	1	1	0	0	0	0	1
AC010978.1	ENSG00000235522	0	0	0	0	1	3	0	0	0	1	0	0	0	2	1	0	0	0	0	1	0	0	0	0	1	0	0	1	0	1	0	0	0	0	0	0
AC010980.2	ENSG00000267034	7	9	7	3	10	4	5	0	6	0	6	6	10	10	8	7	8	6	1	0	0	2	2	1	0	0	1	0	3	1	0	0	0	0	0	0
AC010983.1	ENSG00000235056	0	0	0	0	1	0	0	0	0	0	0	0	1	0	0	0	0	0	0	0	0	0	0	0	0	0	0	0	0	0	0	0	0	0	0	0
AC010997.3	ENSG00000270087	1	0	0	1	1	2	0	0	0	0	0	0	8	3	7	10	7	1	0	0	0	0	0	0	0	0	0	0	0	0	0	0	0	0	0	0
AC010997.4	ENSG00000272692	2	0	1	0	0	1	0	0	0	0	0	0	1	0	1	0	0	0	0	0	0	0	0	0	0	0	0	1	1	1	1	0	0	0	0	0
AC010997.5	ENSG00000273248	1	2	1	0	1	3	0	0	0	0	0	0	0	0	0	2	0	0	0	0	0	0	0	1	0	0	0	2	2	2	8	0	0	0	1	0
AC010998.2	ENSG00000271670	2	3	2	1	0	0	0	0	0	0	0	0	0	1	0	0	0	0	0	0	0	0	0	1	0	1	0	0	0	0	0	0	0	0	0	0
AC010999.2	ENSG00000276524	1	1	5	3	0	0	0	0	0	0	0	0	2	2	1	1	2	1	2	1	0	3	0	1	0	0	1	2	2	1	2	0	0	0	0	0
AC010999.3	ENSG00000285331	22	14	18	26	14	18	1	1	1	0	2	7	14	31	21	26	7	13	14	23	5	18	24	18	10	19	13	23	15	28	38	1	7	1	0	4
AC011005.1	ENSG00000230626	0	0	0	0	0	0	0	0	0	0	0	0	0	1	0	0	0	0	0	2	0	0	0	0	0	1	0	2	1	0	0	0	0	0	0	0
AC011008.1	ENSG00000253695	1	0	1	0	1	0	0	0	0	0	0	0	1	1	0	2	0	0	0	0	0	0	0	2	0	2	0	1	0	0	0	0	0	0	0	0
AC011043.1	ENSG00000276256	54	25	84	45	9	52	4	2	11	2	5	29	32	22	139	46	22	38	17	26	27	38	19	46	7	19	38	33	8	46	11	0	1	0	0	1
AC011092.2	ENSG00000255476	1	0	0	0	0	0	0	0	0	0	1	1	0	0	0	2	0	0	2	1	0	1	1	0	0	0	0	4	0	0	1	0	0	0	0	0
AC011124.2	ENSG00000253894	0	0	0	0	0	0	0	0	0	0	0	0	0	0	0	0	0	0	0	0	0	0	0	0	0	0	0	1	1	0	0	0	0	0	0	0
AC011196.1	ENSG00000235518	1	0	1	0	1	0	0	0	0	0	0	0	0	0	0	0	0	0	0	0	0	0	0	0	0	0	0	0	0	0	0	0	0	0	0	0
AC011239.1	ENSG00000224361	0	0	1	0	0	0	0	0	0	0	1	1	0	1	1	2	1	0	0	4	0	3	2	0	5	3	3	1	7	2	0	0	0	0	0	0
AC011247.1	ENSG00000231367	0	0	0	0	0	0	0	0	0	0	0	0	0	0	0	0	0	0	0	0	0	0	0	0	0	0	0	0	0	1	1	0	0	0	0	0
AC011284.1	ENSG00000236510	0	0	0	0	0	0	0	0	0	0	0	0	0	0	0	0	0	0	0	0	0	1	1	0	0	0	0	0	0	0	0	0	0	0	0	0
AC011287.1	ENSG00000229618	5	7	2	0	0	0	0	0	0	0	0	0	4	8	7	8	0	3	0	1	1	0	0	0	0	0	2	0	0	1	1	0	0	0	1	0
AC011287.2	ENSG00000237713	0	1	0	0	0	0	0	0	0	0	0	1	1	1	0	0	0	0	0	0	0	0	0	0	0	0	0	0	0	0	0	0	0	0	0	0
AC011290.1	ENSG00000227172	0	0	0	0	0	0	0	0	0	0	0	0	0	0	0	0	0	0	0	0	0	0	0	0	0	0	0	0	0	0	0	0	0	0	0	0
AC011294.1	ENSG00000233539	0	0	0	0	0	0	0	0	0	0	0	0	0	0	0	0	0	0	0	1	0	1	0	0	0	0	0	0	1	0	0	0	0	0	0	0
AC011306.1	ENSG00000272180	2	0	1	1	1	0	0	0	0	1	0	0	0	0	0	0	0	0	0	0	0	0	0	1	0	0	0	0	0	0	0	0	0	0	0	0
AC011313.1	ENSG00000257642	0	0	0	0	0	0	0	0	0	0	0	0	0	0	0	0	0	0	4	0	1	2	0	3	0	1	2	1	0	0	0	0	0	0	0	0
AC011337.1	ENSG00000271795	3	2	4	3	2	2	0	0	1	0	1	0	0	7	3	4	1	0	1	1	1	3	2	3	0	2	2	2	1	2	0	0	0	0	1	0
AC011352.1	ENSG00000248362	0	0	0	0	0	0	0	0	0	0	0	0	0	0	0	0	0	0	2	8	1	1	2	0	0	0	0	0	0	0	0	0	0	0	0	0
AC011365.1	ENSG00000254042	0	1	2	0	0	1	0	0	0	0	0	0	0	0	0	0	0	0	0	1	0	0	0	0	0	0	0	0	0	0	0	0	0	0	0	0
AC011365.2	ENSG00000254192	0	1	0	0	0	0	0	0	0	0	0	0	0	0	0	0	0	0	0	0	0	0	0	0	0	0	0	0	0	0	0	0	0	0	0	0
AC011374.1	ENSG00000260581	0	0	0	0	0	0	0	0	0	0	0	0	0	0	0	0	0	0	0	0	0	0	0	0	2	0	0	0	0	0	0	0	0	0	0	0
AC011374.2	ENSG00000272112	0	0	0	2	3	0	0	0	0	1	0	0	0	0	0	0	0	0	3	8	1	2	2	0	1	1	2	1	5	2	4	0	0	0	0	1
AC011379.2	ENSG00000254363	3	0	1	0	1	1	0	0	1	0	1	3	4	3	2	4	1	1	3	3	1	1	3	4	5	9	15	15	9	18	21	0	1	2	0	3
AC011389.1	ENSG00000248222	1	0	0	0	1	1	0	0	0	0	0	0	0	0	0	0	0	0	0	2	0	0	0	0	0	0	0	0	0	0	0	0	0	0	0	0
AC011405.1	ENSG00000249593	3	3	0	0	0	1	0	0	0	0	0	0	0	0	0	0	0	0	0	1	0	1	1	1	1	2	2	1	1	0	2	0	1	0	0	0
AC011416.3	ENSG00000283897	0	2	2	0	1	1	1	0	0	0	0	4	5	3	7	5	1	0	0	0	0	2	0	1	0	1	0	2	1	1	0	0	0	0	0	0
AC011443.1	ENSG00000269172	0	0	2	0	0	0	0	0	0	0	0	0	1	1	2	0	1	1	2	2	0	1	1	1	0	2	0	0	1	1	1	0	0	0	0	0
AC011444.1	ENSG00000266983	1	0	0	1	0	0	0	0	0	0	0	0	0	0	1	1	1	1	0	2	1	1	1	2	1	0	2	2	0	0	1	1	0	0	0	0
AC011444.2	ENSG00000267262	0	0	3	3	1	2	0	0	0	0	0	0	0	0	0	0	0	0	0	0	1	0	0	0	0	0	0	1	1	0	0	0	0	0	0	0
AC011445.2	ENSG00000269246	2	1	6	4	2	2	0	1	0	0	0	1	1	4	2	1	3	2	1	7	3	2	2	3	0	0	3	1	3	4	1	0	0	0	0	0
AC011446.1	ENSG00000267512	0	0	1	0	1	0	0	0	0	0	1	0	0	0	0	0	0	0	1	1	1	1	3	1	0	0	1	0	0	0	0	0	1	0	0	0
AC011446.2	ENSG00000267598	2	3	6	4	2	3	0	0	0	0	0	0	0	1	3	1	0	0	3	3	0	4	5	5	0	1	2	0	0	4	1	0	1	0	0	0
AC011447.3	ENSG00000267383	250	136	275	195	91	202	5	4	2	7	13	43	43	44	92	32	66	37	46	63	32	80	54	90	22	32	45	37	30	47	22	1	10	0	1	2
AC011448.1	ENSG00000258674	1	0	0	1	0	0	0	0	0	0	0	0	1	0	0	0	0	0	1	0	0	0	0	0	0	0	0	1	0	0	0	0	0	0	0	0
AC011450.1	ENSG00000197813	3	9	10	5	3	4	0	0	1	0	0	1	3	2	8	2	5	1	3	7	2	2	3	2	0	2	0	2	6	1	0	0	0	0	0	0
AC011451.1	ENSG00000267510	0	1	0	0	0	0	0	0	0	0	0	0	0	0	0	0	0	0	0	1	0	0	0	0	0	0	0	0	0	4	1	0	0	0	0	1
AC011451.3	ENSG00000283108	1	0	0	0	1	0	0	0	0	0	0	0	0	0	2	0	0	0	0	0	0	0	0	1	3	2	4	2	2	5	5	0	0	1	1	0
AC011462.1	ENSG00000255730	0	0	0	0	0	0	0	0	0	0	0	0	0	0	0	0	0	0	0	2	0	0	1	2	0	0	1	2	0	0	2	0	1	0	0	1
AC011466.1	ENSG00000268583	0	0	2	0	0	1	0	0	0	0	0	0	0	0	3	0	0	1	2	2	2	4	1	3	0	0	0	2	0	0	1	0	0	0	0	0
AC011466.2	ENSG00000269321	0	0	0	0	0	0	0	0	0	0	0	0	0	0	0	0	0	0	0	0	0	0	0	1	0	0	0	0	0	0	0	0	0	0	0	0
AC011468.2	ENSG00000267827	0	0	0	0	0	1	0	0	0	0	0	0	0	0	0	0	0	0	0	1	0	0	0	0	0	0	0	0	0	0	0	0	0	0	0	0
AC011468.5	ENSG00000275055	7	1	4	7	1	4	0	0	3	1	1	2	2	0	5	4	3	1	3	2	0	5	1	2	2	3	6	7	4	6	5	0	2	0	0	0
AC011471.2	ENSG00000267563	4	7	7	4	6	9	0	0	1	0	1	2	4	4	16	4	4	1	2	5	4	4	4	8	7	15	17	6	7	9	14	0	4	0	0	0
AC011472.1	ENSG00000267082	0	0	1	0	0	1	0	0	0	0	2	0	0	1	0	0	0	0	0	2	0	1	0	1	0	0	0	1	0	1	0	0	0	0	0	0
AC011472.4	ENSG00000273733	0	0	0	0	0	0	0	0	1	1	0	0	0	2	2	1	1	0	0	0	0	1	0	1	0	1	1	1	1	3	2	0	0	0	0	0
AC011476.2	ENSG00000267149	0	0	0	0	0	0	0	0	0	0	0	0	0	0	0	0	0	0	0	0	0	0	0	0	0	0	0	0	1	0	0	0	0	0	0	0
AC011476.3	ENSG00000267265	3	0	0	0	0	0	0	0	0	0	0	0	0	1	0	0	0	0	0	0	0	0	0	1	0	0	0	0	0	0	1	0	0	0	0	0
AC011477.3	ENSG00000267565	0	1	0	0	1	0	0	0	0	0	0	0	0	0	0	0	0	0	0	0	0	0	0	0	0	0	0	0	0	0	0	0	0	0	0	0
AC011479.1	ENSG00000267748	0	0	0	0	0	0	0	0	0	0	0	0	0	1	0	1	0	0	0	0	0	0	0	1	0	0	0	0	0	0	0	0	0	0	0	0
AC011481.1	ENSG00000267114	0	1	1	0	0	0	0	0	0	0	0	0	1	0	0	0	2	0	0	0	0	0	1	0	0	0	1	1	0	0	0	0	1	0	0	0
AC011481.2	ENSG00000267282	0	0	1	0	0	1	0	0	0	0	0	0	0	0	1	0	0	1	1	0	0	0	1	0	0	0	0	0	3	0	2	0	0	0	0	0
AC011484.1	ENSG00000204850	0	0	0	0	0	0	0	0	0	0	0	0	1	0	0	2	0	1	0	0	0	0	0	1	0	0	0	0	0	0	0	0	0	0	0	0
AC011495.2	ENSG00000268636	0	0	0	1	0	0	0	0	0	0	0	0	0	0	0	0	0	0	0	0	0	0	1	1	0	0	0	0	0	0	0	0	0	0	0	0
AC011495.3	ENSG00000268677	1	0	0	0	0	0	0	0	0	0	0	0	0	0	0	0	0	0	0	0	0	1	0	0	0	0	0	0	0	0	0	0	0	0	0	0
AC011498.1	ENSG00000267011	0	1	1	1	1	0	0	0	0	0	0	0	1	0	1	1	0	0	1	3	2	3	3	0	0	2	2	2	0	1	2	0	0	0	0	0
AC011498.2	ENSG00000267030	0	0	0	0	1	0	0	0	0	0	0	0	0	0	0	0	0	0	0	0	0	0	0	0	0	1	0	0	0	0	0	0	0	0	0	0
AC011498.3	ENSG00000267255	0	0	0	0	0	0	0	0	0	0	0	0	0	0	0	1	0	1	0	0	0	0	0	0	0	0	0	0	0	0	0	0	0	0	0	0
AC011498.4	ENSG00000267385	0	1	0	0	0	0	0	0	0	0	0	1	0	1	0	0	0	0	0	0	0	0	0	0	0	0	1	0	0	0	0	0	0	0	0	0
AC011498.6	ENSG00000267769	1	2	6	3	0	3	0	0	0	0	0	1	2	0	0	3	0	1	0	0	0	0	0	1	1	2	0	1	0	1	0	0	0	0	0	0
AC011503.1	ENSG00000269289	0	2	0	1	1	0	0	0	0	0	0	0	1	0	0	0	0	0	0	2	0	0	0	1	0	0	0	0	0	0	0	0	0	0	0	0
AC011509.2	ENSG00000267723	0	0	0	0	0	0	0	0	0	0	0	0	1	0	0	0	0	0	0	0	0	0	0	0	0	0	0	0	0	0	0	0	0	0	0	0
AC011510.1	ENSG00000269652	0	0	0	0	0	0	1	0	0	0	0	0	0	0	0	0	0	0	0	0	0	0	0	0	0	0	0	0	0	0	0	0	0	0	0	0
AC011511.1	ENSG00000167807	13	8	15	14	11	10	1	2	4	3	5	7	21	13	30	14	10	5	7	6	2	5	5	5	2	10	12	12	7	12	2	0	1	0	1	0
AC011511.3	ENSG00000267105	0	0	0	0	1	1	0	0	0	0	0	0	1	0	1	0	0	0	1	0	0	1	0	1	0	0	0	0	0	0	0	0	1	0	0	0
AC011511.5	ENSG00000267607	0	0	0	1	0	0	0	0	1	0	0	1	2	5	3	0	0	0	1	1	0	0	0	1	0	0	0	0	0	0	0	0	0	0	0	0
AC011525.1	ENSG00000261400	0	0	0	0	0	0	0	0	0	0	1	0	0	0	0	0	0	0	0	0	0	0	0	0	0	0	0	1	0	0	0	0	0	0	0	0
AC011591.1	ENSG00000267250	1	0	1	0	0	0	0	0	0	0	0	0	0	0	0	0	0	0	0	0	0	0	0	0	0	0	0	0	0	0	0	0	0	0	0	0
AC011595.1	ENSG00000257438	0	0	1	0	0	0	0	0	0	0	0	0	2	0	1	0	0	1	1	0	1	0	0	1	0	0	0	0	0	0	0	0	0	0	0	0
AC011595.2	ENSG00000257890	2	0	5	1	2	2	1	0	0	0	1	1	3	0	3	6	1	1	0	0	1	0	1	0	0	0	0	0	0	0	0	0	0	0	0	0
AC011601.1	ENSG00000257515	0	0	1	0	0	0	0	0	0	0	0	0	0	0	0	0	0	0	1	0	0	0	1	0	0	0	0	0	0	0	0	0	0	0	0	0
AC011603.1	ENSG00000257346	0	0	0	0	0	0	0	0	0	0	0	0	0	0	0	0	0	0	0	1	0	1	2	1	1	0	0	0	1	0	1	1	1	0	0	0
AC011603.2	ENSG00000258017	11	12	22	10	6	11	2	2	0	0	3	7	15	19	22	11	12	7	16	36	16	32	37	34	7	17	12	16	16	23	11	2	5	4	1	1
AC011611.3	ENSG00000257453	1	0	0	1	0	0	0	0	0	0	0	0	0	0	1	1	0	0	2	0	0	0	2	0	0	0	0	1	0	2	1	0	0	0	0	0
AC011611.4	ENSG00000257839	6	10	17	8	6	14	0	1	0	0	0	1	17	20	33	24	7	8	2	5	4	8	3	2	3	5	6	8	4	4	5	0	0	0	0	1
AC011632.1	ENSG00000253706	2	1	2	0	0	1	0	0	0	0	0	0	0	0	1	0	0	0	0	1	0	0	0	0	0	0	1	0	0	0	0	0	0	0	0	0
AC011700.1	ENSG00000274895	0	0	1	1	0	0	0	0	0	0	0	0	1	0	0	1	0	0	0	0	0	0	0	0	0	0	0	0	0	1	0	0	0	0	0	0
AC011731.1	ENSG00000266495	1	0	1	1	0	0	0	0	0	0	1	0	2	1	3	4	0	1	2	1	0	0	0	1	0	1	3	2	2	1	3	1	1	0	0	0
AC011747.1	ENSG00000231083	0	0	0	0	0	0	0	0	0	0	0	0	0	0	0	0	0	0	0	0	1	0	0	0	0	0	0	0	0	0	0	0	0	0	0	0
AC011747.2	ENSG00000231435	0	0	0	0	0	0	0	0	0	0	0	0	0	0	0	0	0	0	1	0	1	0	0	0	0	0	0	0	1	1	0	0	0	0	0	0
AC011773.1	ENSG00000254208	0	0	0	0	1	1	0	0	0	0	0	0	0	0	0	1	1	0	0	0	0	0	0	0	0	0	0	0	0	0	0	0	0	0	0	0
AC011773.3	ENSG00000258256	2	0	1	2	0	2	0	0	0	0	0	0	0	0	0	0	0	1	0	0	0	0	0	0	0	1	0	0	0	0	0	0	0	0	0	0
AC011773.4	ENSG00000260493	12	2	5	5	2	2	0	0	0	0	1	0	3	0	2	2	3	1	1	2	0	0	3	3	0	0	0	0	1	3	1	0	0	0	0	1
AC011815.1	ENSG00000268573	1	2	5	2	2	2	0	0	0	0	0	2	1	0	1	3	1	1	3	5	2	5	6	8	1	1	0	6	4	5	10	0	3	0	0	0
AC011815.2	ENSG00000274184	3	3	3	1	1	1	0	0	1	0	1	3	4	3	10	5	4	7	2	2	2	2	0	1	0	4	2	2	1	8	0	0	0	0	0	0
AC011816.2	ENSG00000272334	0	0	0	0	0	0	0	0	0	0	0	0	0	0	0	0	0	0	0	0	0	0	0	1	0	1	1	0	0	0	0	0	0	0	0	0
AC011825.2	ENSG00000263393	0	0	0	0	0	0	0	0	0	0	0	0	1	0	1	0	0	0	0	0	0	0	0	1	0	0	1	1	1	0	0	0	0	0	0	0
AC011825.4	ENSG00000265008	0	4	1	1	1	0	0	0	0	0	0	0	0	2	1	2	0	0	0	0	1	0	1	2	0	0	1	3	1	2	1	0	0	0	0	0
AC011840.1	ENSG00000231421	0	0	0	0	0	0	0	0	0	0	0	0	2	2	1	0	0	0	0	0	0	0	0	0	0	0	0	0	0	0	0	0	0	0	0	0
AC011840.5	ENSG00000266775	0	0	0	0	0	0	0	0	0	0	0	1	0	0	1	0	0	0	0	0	0	0	0	0	0	0	0	0	0	0	0	0	0	0	0	0
AC011893.1	ENSG00000226806	0	0	0	0	0	0	0	0	0	0	0	0	2	4	12	10	12	1	43	41	24	51	41	9	0	0	2	0	2	0	1	0	0	0	0	0
AC011897.1	ENSG00000228505	0	0	0	1	0	0	0	0	0	0	0	0	0	0	0	0	0	0	0	0	0	0	0	0	0	0	0	0	0	0	0	0	0	0	0	0
AC011921.1	ENSG00000259349	2	4	3	1	0	2	0	0	0	0	0	0	0	0	1	0	0	0	1	1	0	1	0	0	0	1	0	1	0	0	0	0	0	0	0	0
AC011933.3	ENSG00000265342	0	0	0	1	0	0	0	0	0	0	0	0	0	0	1	0	0	0	0	0	0	1	0	0	0	0	0	1	0	0	0	0	0	0	0	0
AC011933.4	ENSG00000265987	0	0	0	0	0	0	0	0	0	0	0	0	0	0	0	0	0	1	0	0	0	0	0	0	0	0	0	0	0	0	0	0	0	0	0	0
AC011939.3	ENSG00000275638	0	0	0	1	0	0	0	0	0	0	1	0	0	0	0	1	0	2	0	0	1	0	1	0	0	1	1	0	0	0	0	0	0	0	1	0
AC011944.1	ENSG00000177699	1	1	4	2	0	1	0	0	1	1	0	0	3	15	18	10	8	5	2	2	1	4	0	2	0	0	0	0	0	0	0	0	0	0	0	0
AC011978.2	ENSG00000261542	2	2	10	5	7	3	0	0	1	1	2	3	4	3	4	2	3	2	2	6	2	3	2	6	1	7	6	9	7	6	6	0	1	0	0	0
AC011997.1	ENSG00000222017	1	1	1	0	2	2	1	1	0	0	0	0	0	0	0	0	0	0	0	0	0	0	0	0	0	0	0	0	0	0	0	0	0	0	0	0
AC012038.1	ENSG00000257373	0	0	0	0	0	0	0	0	0	0	0	0	0	0	0	0	0	0	0	0	0	0	0	0	0	0	0	0	0	0	0	0	1	0	0	0
AC012038.2	ENSG00000257849	0	1	0	1	0	0	0	0	0	0	0	0	0	0	0	0	0	0	0	0	0	0	0	0	0	0	0	0	1	0	1	0	0	0	0	0
AC012055.1	ENSG00000250957	0	0	0	0	0	0	0	0	0	0	0	0	0	0	0	1	0	0	0	0	0	0	0	0	0	0	0	0	0	0	0	0	0	0	0	0
AC012065.3	ENSG00000269976	2	1	0	1	2	1	0	0	0	0	1	1	0	0	0	1	1	0	3	2	2	0	0	0	0	0	0	2	0	1	1	0	0	0	0	0
AC012065.4	ENSG00000270100	12	7	9	6	4	13	2	0	0	0	0	1	4	3	5	5	1	5	2	4	1	2	1	6	2	3	3	3	6	3	2	0	3	0	1	0
AC012073.1	ENSG00000271936	8	6	8	10	3	2	1	0	1	0	4	5	1	6	9	3	2	3	5	9	2	7	9	11	3	11	14	5	1	8	7	1	2	0	0	0
AC012074.1	ENSG00000235072	2	0	4	0	0	1	0	0	0	0	0	0	0	0	1	0	0	0	0	0	0	0	0	0	0	0	1	0	1	0	0	0	0	0	0	0
AC012085.2	ENSG00000258274	0	0	1	0	0	0	0	0	0	0	0	0	0	0	0	0	0	0	0	0	0	0	0	0	1	1	2	1	2	0	4	0	0	0	0	0
AC012087.1	ENSG00000272554	0	0	1	0	0	0	0	0	0	0	0	1	0	0	0	0	0	0	0	0	0	0	0	0	0	0	0	0	0	0	0	0	0	0	0	0
AC012103.1	ENSG00000253376	0	0	0	1	0	0	0	0	0	0	0	0	0	0	0	0	0	0	0	0	0	0	0	0	0	0	0	0	0	0	1	0	1	0	0	0
AC012123.1	ENSG00000228835	1	5	10	2	6	3	0	0	0	0	0	1	1	0	6	5	2	0	0	0	0	0	0	0	0	0	0	0	0	0	0	0	0	0	0	0
AC012146.1	ENSG00000234327	127	87	130	135	94	116	5	4	9	10	28	25	132	89	140	174	63	63	124	205	75	188	159	193	60	134	88	145	54	103	241	10	46	14	7	21
AC012150.1	ENSG00000257258	0	1	1	1	0	1	0	0	0	0	0	0	0	0	0	0	0	0	0	2	0	0	1	1	0	1	0	0	1	0	0	0	0	0	0	0
AC012150.2	ENSG00000275278	0	0	0	0	0	0	0	0	0	0	0	0	0	0	0	0	0	0	0	1	0	0	0	0	0	0	0	0	0	0	0	0	0	0	0	0
AC012157.1	ENSG00000258034	0	0	0	1	0	0	0	0	0	0	0	0	0	0	0	0	0	0	0	1	0	0	0	0	0	0	0	0	0	0	0	0	0	0	0	0
AC012170.2	ENSG00000259298	0	0	0	0	0	0	0	0	0	0	0	0	0	0	0	0	0	0	0	0	0	0	0	0	0	0	0	1	0	0	0	0	0	0	0	0
AC012173.1	ENSG00000260350	0	1	2	0	0	2	0	0	0	0	0	0	0	2	0	1	0	0	1	1	1	1	0	0	0	0	1	1	0	2	1	0	0	0	0	0
AC012174.1	ENSG00000260115	0	3	0	0	0	1	0	0	0	0	0	0	1	2	0	1	0	0	1	4	1	0	0	0	0	0	0	0	0	0	0	0	0	0	0	0
AC012184.1	ENSG00000260111	0	0	0	0	0	0	0	0	0	0	0	0	0	0	0	0	0	0	0	0	0	0	0	1	0	0	1	0	0	0	0	0	0	0	0	0
AC012184.3	ENSG00000261777	8	3	7	8	1	5	0	0	0	0	1	3	6	5	8	3	4	5	3	7	1	5	1	5	4	4	7	10	4	6	8	0	0	0	1	0
AC012213.1	ENSG00000253477	1	0	0	0	1	1	0	0	0	0	0	0	0	0	0	0	0	0	0	0	0	0	1	0	0	0	0	0	0	0	0	0	0	0	0	0
AC012213.2	ENSG00000261670	0	0	0	0	0	0	0	0	0	0	0	0	0	0	0	0	1	0	0	0	0	2	0	1	0	0	0	0	0	0	0	0	0	0	0	0
AC012213.3	ENSG00000266289	0	2	1	0	0	1	0	0	0	0	1	0	1	0	2	1	0	0	2	1	0	0	0	0	1	0	0	0	0	1	2	0	1	0	0	0
AC012213.4	ENSG00000271830	0	2	0	0	2	0	0	0	0	0	0	1	2	0	1	0	0	0	1	0	0	0	0	0	1	0	0	0	0	0	0	0	0	0	0	0
AC012236.1	ENSG00000259772	0	0	0	0	0	0	0	0	0	0	0	0	0	0	0	0	0	0	0	1	0	0	0	0	0	0	0	0	0	0	0	0	0	0	0	0
AC012254.1	ENSG00000266957	0	0	0	0	0	0	0	0	0	0	0	0	0	0	0	0	0	0	0	0	0	0	0	0	0	0	0	0	0	0	0	0	0	0	0	0
AC012254.3	ENSG00000267724	0	0	1	0	0	0	0	0	0	0	0	0	0	0	1	1	1	2	1	0	0	2	0	0	0	1	0	0	0	0	0	0	0	0	0	0
AC012306.2	ENSG00000272667	44	36	75	45	54	49	3	2	3	7	14	15	35	38	46	35	29	30	42	51	27	28	45	55	20	42	44	44	29	41	46	2	17	3	1	2
AC012309.2	ENSG00000267437	0	0	0	0	0	0	0	0	0	0	0	0	0	0	1	0	0	0	0	0	0	0	0	0	0	0	0	0	0	0	0	0	0	0	0	0
AC012313.1	ENSG00000232098	2	3	2	4	0	1	0	0	1	0	0	1	0	2	0	5	3	2	2	1	0	4	4	2	0	4	2	2	1	3	5	0	0	0	0	0
AC012313.2	ENSG00000268049	1	0	5	3	0	1	0	0	0	0	0	1	0	2	0	0	0	0	1	2	0	0	2	3	0	0	2	0	0	0	0	0	0	0	0	0
AC012313.3	ENSG00000268230	0	0	1	0	0	0	0	0	1	0	0	0	0	0	0	0	0	0	0	0	0	0	0	1	0	1	1	2	0	1	0	0	1	0	0	0
AC012313.5	ENSG00000268912	1	2	0	1	1	3	0	0	0	0	0	1	3	0	5	2	2	0	2	0	2	2	2	3	1	2	4	3	1	4	5	1	1	0	0	1
AC012313.6	ENSG00000269054	2	0	0	0	2	1	0	0	1	0	0	0	0	0	2	2	0	0	0	1	1	0	0	0	0	0	1	1	0	1	1	0	0	0	0	0
AC012313.7	ENSG00000269106	1	0	0	0	0	0	0	0	0	0	0	0	0	0	0	0	0	0	0	0	0	1	0	0	0	0	0	0	0	1	0	0	0	0	0	0
AC012313.8	ENSG00000269473	0	0	5	2	0	2	0	0	0	0	0	0	0	0	2	0	0	1	0	0	0	0	0	1	0	0	0	0	2	0	1	0	0	0	0	0
AC012313.9	ENSG00000273901	0	0	0	0	0	1	0	0	0	0	0	0	1	0	0	0	1	0	0	0	0	2	0	0	0	0	0	1	0	1	0	0	0	0	0	0
AC012322.1	ENSG00000261028	0	0	0	0	0	0	0	0	0	0	0	0	0	0	0	0	0	0	0	0	0	0	1	0	0	0	0	0	0	0	0	0	0	0	0	0
AC012339.1	ENSG00000248762	0	0	0	0	0	0	0	0	0	0	0	0	0	0	1	0	0	0	0	0	0	0	0	0	0	0	0	0	0	0	0	0	0	0	0	0
AC012349.1	ENSG00000254254	0	1	0	0	0	0	0	0	0	0	0	0	0	0	0	1	0	0	0	1	0	0	0	0	0	0	0	0	1	0	4	0	1	0	0	1
AC012358.1	ENSG00000203327	0	0	1	0	0	0	0	0	1	0	1	0	0	0	0	0	1	0	1	1	0	0	0	2	0	1	0	0	0	1	0	0	0	0	0	0
AC012358.3	ENSG00000240401	1	4	0	2	0	2	0	0	2	0	1	3	4	12	10	13	1	7	3	1	1	2	1	4	0	5	8	2	0	0	9	0	0	0	0	0
AC012360.1	ENSG00000235319	2	0	5	2	1	2	0	0	0	0	0	1	1	2	1	0	1	0	0	1	0	1	2	0	0	3	0	1	2	1	0	0	0	0	0	0
AC012360.2	ENSG00000272861	1	1	0	0	1	1	1	0	0	0	1	1	4	5	4	0	2	1	1	2	1	2	0	4	0	3	1	0	0	2	2	0	0	0	0	0
AC012360.3	ENSG00000272994	128	79	137	102	61	110	1	3	5	3	11	11	62	84	103	69	35	31	47	63	31	46	50	69	14	60	38	38	28	41	64	2	10	2	1	5
AC012363.1	ENSG00000224789	0	0	0	0	0	0	0	0	0	0	0	0	0	0	1	0	0	0	0	0	0	0	0	0	0	0	0	0	0	0	0	0	1	0	0	0
AC012368.1	ENSG00000225889	54	48	99	46	29	79	5	4	0	0	4	6	10	7	13	15	8	7	0	0	0	1	1	1	0	0	0	0	0	0	0	0	0	0	0	0
AC012368.2	ENSG00000228079	0	1	0	0	0	0	0	0	0	0	0	0	0	0	0	0	0	0	0	0	0	0	0	0	0	0	0	0	0	0	0	0	0	0	0	0
AC012377.1	ENSG00000246863	2	0	3	0	1	1	0	0	0	0	0	0	1	0	2	1	0	0	3	2	2	5	2	5	1	3	1	3	1	1	2	0	0	0	0	0
AC012409.3	ENSG00000277135	2	1	1	1	1	0	1	0	1	1	2	0	2	0	4	1	0	1	2	1	3	0	0	3	1	0	0	0	0	0	0	0	0	0	0	0
AC012414.5	ENSG00000260409	0	0	0	0	1	1	0	0	0	0	0	0	0	0	0	0	0	0	0	0	0	0	0	0	1	2	1	0	1	1	0	0	0	0	0	0
AC012435.2	ENSG00000261775	0	0	1	0	0	0	0	0	0	0	0	0	0	0	0	0	0	0	0	0	0	1	0	0	0	0	0	0	0	0	0	0	0	0	0	0
AC012442.1	ENSG00000228251	0	0	4	0	0	0	0	0	0	0	0	1	1	1	1	1	0	2	0	0	0	0	0	2	0	1	0	2	1	0	1	0	0	0	0	0
AC012447.1	ENSG00000265451	0	0	0	0	2	0	0	0	0	0	0	0	1	0	1	1	0	0	0	0	1	0	0	0	0	0	0	0	1	1	0	0	0	0	0	1
AC012456.1	ENSG00000203643	0	0	0	0	0	0	0	0	0	0	0	0	0	0	0	1	0	0	0	0	0	0	0	0	0	0	0	0	0	0	0	0	0	0	0	0
AC012456.2	ENSG00000230790	0	0	0	1	0	0	0	0	0	0	0	0	0	0	0	0	0	0	0	0	0	0	0	0	0	0	0	0	0	0	0	0	0	0	0	0
AC012462.1	ENSG00000225166	0	0	0	0	0	0	0	0	0	0	0	0	0	0	0	0	0	0	0	0	0	0	0	0	0	0	0	1	0	0	0	0	0	0	0	1
AC012462.2	ENSG00000228618	0	0	0	0	0	0	0	0	0	0	2	0	0	0	0	0	0	0	0	0	0	0	0	0	0	0	0	0	0	0	0	0	0	0	0	0
AC012462.3	ENSG00000230695	0	0	0	0	0	0	0	0	0	0	0	0	0	1	0	0	0	0	0	0	0	0	0	0	0	0	0	0	0	0	0	0	0	0	0	0
AC012464.3	ENSG00000271382	0	0	0	0	0	1	0	0	0	0	0	0	0	0	0	2	0	1	1	0	1	0	0	0	0	0	0	0	0	0	0	0	0	0	0	0
AC012467.2	ENSG00000271976	9	9	17	9	10	7	0	0	1	0	8	6	13	16	30	18	6	8	9	18	5	11	8	8	5	9	13	10	8	12	16	0	3	2	2	2
AC012485.1	ENSG00000225057	0	1	1	0	0	1	0	0	0	0	0	0	0	3	1	0	0	0	1	0	0	0	0	1	0	2	1	0	1	1	1	1	0	0	0	1
AC012485.3	ENSG00000283635	4	2	1	2	0	1	0	0	0	0	0	0	0	2	2	0	0	0	0	1	0	1	2	1	1	1	1	1	1	1	2	0	1	0	0	0
AC012499.1	ENSG00000229941	0	0	0	0	0	0	0	0	0	0	0	0	0	0	1	1	2	0	0	0	0	0	0	0	0	0	0	0	0	0	0	0	0	0	0	0
AC012507.1	ENSG00000230385	0	0	0	0	0	0	0	0	0	0	0	0	0	0	0	0	0	0	0	0	0	0	1	0	0	0	0	0	0	0	0	0	0	0	0	0
AC012507.2	ENSG00000232520	0	1	1	0	0	1	0	0	0	0	0	0	0	0	1	1	0	0	0	0	0	0	0	0	0	0	0	0	0	0	0	0	0	0	0	0
AC012508.1	ENSG00000260163	1	0	2	3	0	1	0	0	0	0	0	1	2	0	2	0	1	0	1	3	1	1	3	5	0	0	2	0	0	1	3	0	1	0	0	0
AC012508.2	ENSG00000260634	0	0	0	0	0	0	0	0	0	0	0	0	0	0	0	0	1	0	0	1	0	0	0	0	0	0	0	0	0	0	0	0	0	0	0	0
AC012510.1	ENSG00000273466	10	9	22	18	10	7	0	0	2	1	0	1	6	5	8	7	2	2	7	16	6	17	16	14	3	10	15	13	9	12	16	1	3	1	1	0
AC012511.1	ENSG00000272564	0	0	2	0	0	0	0	0	0	1	0	1	2	1	1	2	0	0	1	0	0	1	1	1	0	1	0	0	0	0	1	0	0	0	0	0
AC012513.1	ENSG00000231092	0	1	0	0	0	1	0	0	0	0	0	0	0	0	0	0	1	0	0	0	0	0	0	0	0	0	0	0	0	0	0	0	0	0	0	0
AC012531.1	ENSG00000260597	0	0	0	1	0	3	0	0	0	0	0	0	2	0	1	1	0	0	7	8	2	4	0	2	1	0	0	0	0	0	6	1	0	0	0	0
AC012531.2	ENSG00000273046	0	1	0	0	0	0	0	0	0	0	0	0	0	0	0	0	0	0	0	0	0	0	0	0	0	0	0	0	0	0	0	0	0	0	0	0
AC012555.1	ENSG00000257327	1	0	1	0	1	0	0	0	0	0	1	0	1	0	0	0	0	0	0	2	0	2	0	0	0	0	0	1	0	0	1	0	0	0	0	0
AC012555.2	ENSG00000257754	0	0	3	0	0	0	0	0	0	0	0	0	0	0	0	0	0	0	0	0	0	0	0	1	0	0	0	0	0	0	0	0	0	0	0	0
AC012557.1	ENSG00000271843	2	2	2	1	0	0	0	0	1	0	0	0	0	2	5	6	3	2	2	0	0	1	2	2	0	0	2	2	2	3	0	0	2	0	1	0
AC012557.2	ENSG00000272181	3	0	3	1	3	3	0	0	0	1	0	0	4	2	1	5	1	1	1	1	2	0	3	1	0	2	3	1	0	3	4	0	0	0	0	0
AC012560.1	ENSG00000282863	0	0	0	1	0	0	0	0	0	0	0	0	0	0	0	0	0	0	0	0	0	0	0	0	0	0	1	0	0	0	0	0	0	0	0	0
AC012574.2	ENSG00000254002	0	0	0	0	0	0	0	0	0	0	0	0	0	0	0	0	0	0	16	32	15	15	25	9	11	20	21	10	11	21	32	1	3	0	0	0
AC012593.1	ENSG00000226994	0	0	0	0	1	0	0	0	0	0	0	0	0	0	0	0	0	0	0	0	0	0	0	0	0	0	0	1	0	0	0	0	0	0	0	0
AC012594.1	ENSG00000231898	0	1	0	0	0	0	0	0	0	0	0	0	0	0	0	0	0	0	0	0	0	1	0	0	0	0	0	0	0	0	0	0	0	0	0	0
AC012603.1	ENSG00000271849	2	1	3	2	1	1	1	0	2	1	0	1	2	2	6	5	2	3	1	2	1	1	2	1	0	0	2	0	2	2	1	0	1	1	0	0
AC012613.1	ENSG00000248647	0	0	0	0	0	0	0	0	0	0	0	0	0	1	0	1	1	0	0	0	0	0	0	0	0	0	0	0	0	0	0	0	0	0	0	0
AC012613.2	ENSG00000253406	0	0	0	0	0	0	0	0	0	0	0	0	2	0	0	3	1	0	1	0	0	1	1	0	1	0	0	0	0	0	1	0	0	0	0	0
AC012615.1	ENSG00000261526	12	20	35	22	24	19	0	2	1	1	6	12	19	19	26	24	13	14	18	21	15	12	29	29	6	30	22	27	15	27	30	2	10	1	1	1
AC012615.2	ENSG00000267007	1	0	0	1	0	0	1	0	0	0	0	0	1	0	0	1	0	0	5	2	2	1	3	4	0	2	0	0	0	0	1	0	0	0	0	0
AC012615.3	ENSG00000267125	0	0	0	1	0	0	0	0	0	0	0	0	0	0	0	0	0	0	0	0	0	0	0	0	0	0	0	0	0	0	0	0	0	0	0	0
AC012615.4	ENSG00000267141	1	0	0	0	0	0	0	0	0	0	0	0	0	0	0	0	0	0	0	0	0	0	0	0	0	0	0	0	0	0	0	0	0	0	0	0
AC012615.6	ENSG00000267244	0	0	0	0	1	0	0	0	0	0	0	0	0	0	0	0	0	0	0	1	0	0	0	0	0	0	0	0	0	1	0	0	0	0	0	0
AC012617.1	ENSG00000267053	0	0	0	0	0	0	0	0	0	0	0	0	0	0	1	0	0	0	0	0	0	0	0	0	0	0	0	0	0	0	0	0	0	0	0	0
AC012625.1	ENSG00000251361	1	0	0	0	4	0	0	1	0	0	0	1	0	0	0	0	1	0	2	3	2	5	2	1	0	0	0	1	0	1	1	0	1	0	0	0
AC012629.2	ENSG00000272324	0	2	0	0	0	0	0	0	0	0	1	0	2	2	1	1	0	0	0	0	1	1	0	0	0	0	0	1	0	0	0	0	0	0	0	0
AC012636.1	ENSG00000249825	0	1	0	0	0	0	0	0	0	0	0	0	0	1	0	0	0	0	0	0	0	0	0	0	0	0	0	0	0	0	0	0	0	0	0	0
AC012640.1	ENSG00000248968	5	6	5	5	1	6	0	0	0	0	0	0	3	3	5	0	2	2	3	6	2	2	5	8	2	0	3	5	2	3	7	0	2	0	0	0
AC012640.2	ENSG00000259802	24	20	30	22	15	20	0	2	0	2	4	7	22	20	14	27	9	9	11	30	17	17	11	11	5	8	13	12	5	25	44	2	4	0	2	2
AC012640.3	ENSG00000271715	0	0	0	1	0	1	0	0	0	0	0	0	0	0	0	1	0	0	0	1	0	0	0	0	0	0	0	0	0	0	1	0	0	0	0	0
AC012640.4	ENSG00000271980	2	0	7	3	3	3	0	0	0	1	0	2	3	2	0	2	0	2	1	6	1	0	1	3	0	1	0	1	1	3	1	0	0	0	0	0
AC012645.1	ENSG00000250616	1	8	11	1	3	4	2	0	0	0	1	3	4	15	10	5	4	4	2	1	0	2	1	4	4	11	6	4	4	5	13	0	3	0	1	1
AC012645.2	ENSG00000261367	1	0	0	0	0	0	0	0	0	0	0	0	0	0	0	0	0	0	0	0	0	0	0	1	0	0	0	0	0	0	0	0	0	0	0	0
AC012645.3	ENSG00000261416	0	0	0	1	0	0	0	0	0	0	0	0	0	0	1	0	0	0	0	0	0	0	0	0	0	0	0	0	0	0	0	0	0	0	0	0
AC012645.4	ENSG00000275371	1	0	1	0	0	0	0	0	0	0	0	0	1	1	0	0	0	0	0	1	1	2	0	2	0	0	4	0	5	1	2	1	2	0	0	1
AC012651.1	ENSG00000258461	0	0	0	0	0	0	0	0	0	1	0	0	0	3	1	3	0	1	0	0	0	0	0	0	0	2	1	1	2	5	2	0	0	0	0	0
AC012668.3	ENSG00000237525	0	0	0	0	0	0	0	0	0	0	0	0	0	0	0	0	0	0	0	1	0	0	1	0	0	0	0	0	0	0	2	0	1	0	0	0
AC013264.1	ENSG00000231621	0	0	0	0	0	0	0	0	0	0	0	0	0	1	0	0	0	1	0	0	0	0	0	0	0	0	0	0	0	0	0	0	0	0	0	0
AC013268.5	ENSG00000283684	2	1	4	1	1	1	0	0	2	0	3	0	2	1	3	2	1	1	7	13	3	11	5	2	1	1	5	3	1	5	3	0	3	0	0	0
AC013270.1	ENSG00000235480	1	1	0	1	1	1	0	0	0	0	0	0	0	1	1	0	0	0	0	0	0	0	0	0	0	0	0	0	0	0	0	0	0	0	0	0
AC013271.1	ENSG00000284337	8	1	5	3	8	4	2	1	3	0	3	2	15	10	12	7	7	4	24	56	16	29	15	14	6	7	10	6	5	17	20	2	1	1	0	2
AC013275.1	ENSG00000231013	0	0	1	0	0	1	0	0	0	0	0	0	0	0	0	0	0	0	0	0	0	0	0	0	0	0	0	0	0	0	0	0	0	0	0	0
AC013356.2	ENSG00000259211	0	0	0	0	0	0	0	0	0	0	0	0	0	0	0	0	0	0	0	0	0	0	0	0	0	0	0	0	1	0	0	0	0	0	0	0
AC013356.3	ENSG00000259364	1	0	0	0	0	0	0	0	0	0	0	0	0	0	0	0	0	0	0	0	0	0	0	0	0	0	0	0	0	0	0	0	0	0	0	0
AC013391.3	ENSG00000261478	0	0	0	0	0	0	0	0	0	0	0	0	0	0	0	1	0	0	0	0	0	0	0	0	0	0	0	0	0	0	0	0	0	0	0	0
AC013394.1	ENSG00000279765	25	32	36	20	13	25	2	0	2	1	9	9	33	32	47	37	15	18	19	26	11	24	21	18	10	20	28	21	18	23	24	2	3	1	0	3
AC013400.1	ENSG00000271991	4	3	9	2	0	2	0	0	0	0	0	0	1	0	5	0	0	0	2	4	0	4	0	3	1	0	2	2	2	2	1	0	0	0	0	1
AC013403.2	ENSG00000272148	2	3	4	3	1	1	0	0	0	0	1	1	2	0	1	0	0	1	1	6	0	2	4	0	1	1	2	1	2	2	1	0	0	0	0	0
AC013436.1	ENSG00000228596	0	0	0	0	1	0	0	0	0	0	0	0	0	0	0	0	0	0	0	0	0	0	0	0	0	0	0	0	0	0	0	0	0	0	0	0
AC013448.1	ENSG00000231189	0	0	1	1	0	0	0	0	0	0	1	0	0	0	1	0	0	0	0	0	0	2	0	0	0	0	0	0	0	1	0	0	0	0	0	0
AC013451.1	ENSG00000258425	0	0	0	0	0	0	0	0	0	0	0	0	0	0	0	0	0	0	0	0	0	0	0	0	0	0	0	1	0	0	0	0	0	0	0	0
AC013451.2	ENSG00000258976	0	0	2	0	1	0	0	0	0	1	1	0	0	0	0	1	0	0	2	1	2	3	1	0	0	1	0	6	0	2	3	2	3	0	0	0
AC013460.1	ENSG00000229727	2	1	0	0	0	0	0	0	0	0	0	0	0	0	0	0	0	0	0	0	0	0	0	0	0	0	0	0	1	0	0	0	0	0	0	0
AC013468.1	ENSG00000273240	1	1	0	0	0	0	0	0	0	0	0	1	1	1	1	1	1	0	0	6	0	0	0	1	3	2	2	1	2	1	2	0	0	1	0	0
AC013470.2	ENSG00000226690	0	1	0	0	0	1	0	0	0	0	0	0	0	0	0	0	0	0	0	0	0	0	0	0	0	0	0	0	0	0	0	0	0	0	0	0
AC013472.1	ENSG00000205500	0	0	1	0	0	1	0	0	0	0	0	0	1	0	0	0	0	0	0	1	0	0	0	0	0	0	0	0	0	0	0	0	0	0	0	0
AC013472.2	ENSG00000230286	0	0	0	0	0	0	0	0	0	0	0	0	0	0	0	0	0	0	0	0	0	0	0	0	0	0	0	0	0	0	0	0	0	0	0	0
AC013472.3	ENSG00000272056	4	4	9	4	1	9	0	0	0	0	2	1	2	2	3	4	3	3	3	5	2	2	3	1	0	0	2	0	1	1	4	0	0	0	0	0
AC013476.1	ENSG00000234193	0	0	0	0	0	0	0	0	0	0	0	0	1	0	0	0	0	1	0	0	0	0	0	0	0	0	0	0	0	0	0	0	0	0	0	0
AC013549.1	ENSG00000203258	0	0	0	0	0	0	0	0	0	0	0	0	1	0	0	0	0	1	3	0	1	0	0	1	0	2	0	0	0	3	0	0	0	0	0	0
AC013549.2	ENSG00000254688	0	0	0	0	0	0	0	0	0	0	0	0	1	0	1	0	0	0	0	0	0	0	0	0	0	0	1	0	0	0	0	0	0	0	0	0
AC013553.3	ENSG00000277351	2	7	0	0	0	2	0	0	0	0	0	0	0	0	0	0	0	0	0	0	0	0	0	0	0	0	0	0	0	0	0	0	0	0	0	0
AC013553.4	ENSG00000278737	0	0	0	0	0	0	0	0	0	0	0	0	0	0	2	2	0	0	0	0	0	0	0	0	0	0	0	0	0	0	0	0	0	0	0	0
AC013565.1	ENSG00000260123	0	0	0	0	0	0	0	0	0	0	0	0	0	0	0	0	0	0	0	0	0	0	0	0	0	0	0	0	0	0	1	0	0	0	0	0
AC013565.3	ENSG00000261407	0	0	0	0	0	0	0	0	0	0	0	0	0	4	2	1	2	1	2	0	0	0	2	1	0	0	1	0	0	2	3	0	0	0	0	0
AC013643.2	ENSG00000253875	0	0	0	0	0	0	0	0	0	0	0	0	0	0	0	0	0	0	0	0	0	0	0	0	0	0	0	1	0	0	0	0	0	0	0	0
AC013644.1	ENSG00000253139	0	0	0	0	0	0	0	0	0	0	0	0	0	0	0	0	0	0	0	0	0	0	0	0	0	0	0	0	0	0	0	0	2	0	0	0
AC013652.1	ENSG00000259345	2	3	0	1	0	4	1	1	1	2	5	1	1	17	20	14	8	5	54	127	37	32	11	17	1	1	1	1	4	2	5	0	0	0	0	0
AC013714.1	ENSG00000254606	1	2	0	0	1	0	0	0	0	0	0	0	1	0	0	0	0	0	0	0	0	1	0	1	0	0	0	0	1	0	0	0	0	0	0	0
AC013726.1	ENSG00000259793	0	0	0	0	0	1	0	0	0	0	0	0	2	2	4	1	1	1	1	3	0	1	1	2	2	3	1	0	0	1	3	0	1	0	0	0
AC013731.1	ENSG00000270557	1	1	0	2	0	0	0	0	1	0	0	0	0	1	0	0	1	0	1	1	0	2	2	0	1	3	2	5	3	4	4	1	1	0	0	0
AC015468.3	ENSG00000254092	0	0	0	0	0	0	0	0	0	0	0	0	0	0	0	0	0	0	0	0	0	0	1	0	0	0	0	0	0	0	0	0	0	0	0	0
AC015522.1	ENSG00000254202	2	1	0	1	0	4	0	0	0	0	0	0	7	4	2	3	2	4	3	0	1	0	0	0	0	0	0	0	0	0	0	0	0	0	0	0
AC015563.2	ENSG00000264982	0	0	0	0	0	0	0	0	0	0	0	0	0	0	0	0	0	0	1	0	0	0	0	0	0	0	0	0	0	0	0	0	0	0	0	0
AC015574.1	ENSG00000275016	0	0	0	0	1	0	0	0	0	0	0	0	0	0	2	0	0	0	0	0	0	0	0	0	0	0	0	0	0	0	0	0	0	0	0	0
AC015660.2	ENSG00000259590	0	0	1	0	0	0	0	0	0	0	0	0	0	0	1	0	0	0	0	0	1	0	0	0	0	0	0	0	0	0	0	0	0	0	0	0
AC015660.4	ENSG00000274294	0	0	0	0	0	0	0	0	0	0	0	0	0	0	0	0	0	0	0	0	0	0	0	0	0	0	0	0	0	0	0	0	0	0	0	0
AC015674.1	ENSG00000264558	0	0	0	0	0	0	0	0	0	0	0	0	0	0	0	0	0	0	0	0	0	2	0	0	0	0	0	0	1	0	0	0	0	0	0	0
AC015688.6	ENSG00000266872	0	0	0	0	0	0	0	0	0	0	0	0	0	1	0	0	0	0	0	0	0	0	0	0	0	0	0	0	0	0	0	0	0	0	0	0
AC015689.1	ENSG00000254480	4	0	1	0	4	3	0	0	0	0	1	0	1	0	0	0	0	0	0	7	0	0	1	0	0	0	1	0	2	2	3	0	0	0	0	0
AC015712.1	ENSG00000232386	1	2	1	2	0	1	0	0	0	0	0	0	0	0	0	0	0	0	0	1	0	0	0	1	3	4	19	4	6	21	29	0	5	1	0	0
AC015712.2	ENSG00000259583	2	1	0	1	0	0	0	0	0	1	1	0	0	0	0	0	0	0	0	8	0	0	1	4	2	8	7	3	7	8	23	0	3	0	1	2
AC015712.6	ENSG00000272808	0	0	0	0	0	0	0	0	0	0	0	0	0	1	0	0	0	2	0	0	0	0	0	0	0	2	2	0	3	5	3	0	0	0	0	0
AC015712.7	ENSG00000278456	0	0	0	0	0	0	0	0	0	0	0	0	0	0	0	0	0	0	0	0	0	0	0	0	0	0	0	0	0	1	0	0	0	0	0	0
AC015726.1	ENSG00000270091	10	9	13	9	3	8	1	0	1	1	1	2	4	4	5	6	5	2	4	3	5	3	8	1	3	6	9	13	9	10	11	0	0	0	0	4
AC015726.2	ENSG00000276406	0	0	0	0	0	0	0	0	0	0	0	0	0	0	0	0	0	0	0	0	0	0	0	0	0	0	0	0	0	0	0	0	0	0	0	0
AC015727.1	ENSG00000263220	4	0	4	2	1	4	0	0	0	0	0	2	0	2	2	2	2	0	0	1	2	3	1	2	0	3	2	1	4	3	3	0	1	0	0	0
AC015795.1	ENSG00000250751	0	0	0	0	0	0	0	0	0	0	0	0	0	0	0	0	0	0	1	0	0	3	1	0	0	0	0	1	0	0	0	0	0	0	0	0
AC015802.1	ENSG00000267078	0	0	1	0	0	0	0	0	0	0	0	0	0	0	0	0	0	0	0	0	0	0	0	0	0	0	0	0	0	0	0	0	0	0	0	0
AC015802.4	ENSG00000267546	0	0	0	0	0	0	0	0	0	0	0	0	0	1	0	1	1	1	0	0	0	2	0	0	1	1	0	0	0	0	1	0	0	0	0	0
AC015802.6	ENSG00000284526	95	103	128	73	65	91	1	1	4	3	4	8	22	24	47	38	24	13	40	80	27	38	65	46	6	13	13	14	5	6	7	0	5	2	0	1
AC015813.1	ENSG00000264112	61	48	121	51	73	89	3	1	2	4	17	9	34	29	57	40	22	22	23	33	18	22	39	63	14	49	39	37	28	51	49	2	15	6	6	5
AC015813.2	ENSG00000266086	7	8	16	14	12	15	0	1	0	4	0	1	6	2	5	5	1	1	1	8	7	5	7	4	3	8	5	6	4	14	15	0	2	2	0	0
AC015813.3	ENSG00000266290	2	1	0	0	0	0	0	0	0	0	0	0	0	0	0	0	0	0	0	0	0	0	0	0	0	0	0	0	2	0	0	0	0	0	0	0
AC015813.4	ENSG00000278642	0	1	2	0	0	0	0	0	0	0	0	0	0	0	0	0	0	0	0	0	0	0	1	1	0	0	0	0	0	0	1	0	1	0	0	0
AC015818.2	ENSG00000260907	0	0	1	1	0	0	0	1	0	0	0	2	1	0	0	0	0	0	1	1	0	0	1	0	0	0	0	0	1	0	2	0	1	0	0	0
AC015819.1	ENSG00000273669	1	1	2	1	1	1	0	0	0	0	0	2	0	1	1	0	4	0	1	2	2	0	4	2	0	0	1	1	0	0	0	0	0	0	0	0
AC015819.2	ENSG00000278607	1	1	3	0	1	2	0	0	0	0	2	1	0	2	0	0	0	1	1	2	1	1	2	1	0	0	0	0	0	1	0	0	0	0	0	0
AC015845.1	ENSG00000264914	0	0	0	0	0	0	0	0	0	0	0	0	0	0	0	0	0	0	0	0	0	0	0	0	0	1	0	0	0	0	0	0	0	0	0	0
AC015845.2	ENSG00000265542	1	0	0	2	1	0	0	0	0	0	0	0	0	1	0	0	0	0	0	0	0	1	0	0	0	3	0	0	0	0	0	0	0	0	0	0
AC015849.1	ENSG00000270240	0	0	0	1	0	0	0	0	1	0	0	1	2	2	3	0	2	0	1	0	0	0	1	0	0	1	0	2	0	4	4	0	0	0	0	0
AC015849.2	ENSG00000270829	0	0	0	0	0	2	0	0	0	0	0	0	0	0	1	0	0	0	0	0	0	0	0	0	0	0	1	0	0	0	0	0	0	0	0	0
AC015849.3	ENSG00000270871	0	2	0	0	0	1	0	0	0	0	0	0	1	0	1	0	1	1	0	0	1	1	2	1	0	0	0	1	0	0	1	0	0	0	0	0
AC015849.5	ENSG00000270977	1	0	0	1	0	0	0	0	0	0	0	0	0	0	0	0	0	0	0	0	0	0	0	0	0	1	0	0	1	0	0	0	1	0	0	0
AC015908.2	ENSG00000263508	0	0	0	0	0	0	0	0	0	0	0	0	0	0	0	1	1	0	0	0	0	0	0	0	0	0	0	0	0	0	0	0	0	0	0	0
AC015908.3	ENSG00000264016	1	0	0	0	0	0	0	0	0	0	0	0	0	0	0	0	0	0	0	0	0	0	0	0	0	0	0	0	0	0	0	0	0	0	0	0
AC015908.4	ENSG00000266114	0	0	0	1	0	0	0	0	0	0	0	0	0	1	0	0	0	0	0	0	0	0	0	0	0	0	0	0	1	0	0	0	0	0	0	0
AC015908.7	ENSG00000285220	0	0	0	0	0	1	0	0	0	0	0	0	0	0	0	0	0	0	0	0	0	0	0	0	0	0	0	1	0	0	0	0	0	0	0	0
AC015909.2	ENSG00000253730	0	0	0	2	1	0	0	0	0	0	0	0	3	5	3	1	0	1	0	1	0	0	0	1	3	0	0	1	1	3	1	0	0	0	0	0
AC015909.3	ENSG00000261959	0	0	0	0	0	0	0	0	0	0	0	0	0	0	0	0	0	0	0	0	0	0	0	0	1	2	0	0	0	1	0	0	0	0	1	0
AC015912.3	ENSG00000274213	18	12	22	15	9	17	0	1	0	0	3	6	7	8	12	4	12	1	15	39	8	19	21	29	7	22	16	14	4	21	23	0	3	0	0	1
AC015917.2	ENSG00000265254	1	2	5	4	3	2	0	0	0	0	0	0	1	2	3	0	2	1	1	3	0	3	1	1	2	9	2	6	2	7	12	0	1	0	1	1
AC015921.1	ENSG00000262884	1	0	0	0	0	0	0	0	0	0	0	0	0	0	0	0	0	0	0	0	1	0	0	1	0	0	0	0	0	0	0	0	1	0	0	0
AC015922.4	ENSG00000276855	24	15	15	14	7	20	1	1	1	1	3	14	21	10	35	27	19	6	5	4	8	6	3	3	21	26	33	48	30	53	68	1	7	3	5	7
AC015936.1	ENSG00000267334	1	1	0	0	0	0	0	0	0	0	0	0	0	0	1	1	0	0	0	1	0	0	1	0	0	0	0	1	0	0	0	0	0	0	0	0
AC015961.1	ENSG00000267651	0	0	0	0	0	0	0	0	0	0	0	0	0	0	0	0	0	0	0	0	0	0	0	0	0	1	0	0	0	0	0	0	0	0	0	0
AC015961.2	ENSG00000267707	4	3	8	3	2	4	0	0	0	0	0	0	1	0	7	0	0	1	1	2	1	1	1	1	2	2	3	9	4	8	1	0	1	1	0	0
AC015967.1	ENSG00000274400	4	1	5	3	2	5	0	0	0	0	2	2	2	2	2	0	3	0	2	1	3	1	1	2	0	0	1	1	0	3	0	0	0	0	0	0
AC015971.1	ENSG00000228363	1	0	0	0	0	1	0	0	0	0	0	0	0	0	0	0	0	0	1	2	0	1	0	0	0	0	0	0	0	0	0	0	0	0	0	0
AC015982.1	ENSG00000272606	7	4	9	6	5	6	1	1	1	2	1	2	19	17	20	12	8	6	15	25	6	9	14	20	7	26	17	15	11	14	34	1	6	0	0	0
AC015983.2	ENSG00000234418	0	0	0	0	0	0	0	0	0	0	0	0	0	1	0	0	0	0	0	0	0	0	0	0	0	0	0	0	0	0	0	0	0	0	0	0
AC015987.1	ENSG00000224746	1	0	2	1	1	0	0	0	0	0	0	0	0	0	1	0	0	0	2	2	1	1	1	1	0	1	4	7	2	3	1	0	0	0	0	0
AC016026.1	ENSG00000093100	1	0	0	1	0	2	0	0	0	0	0	0	0	0	0	0	0	0	1	0	0	0	0	0	0	0	0	0	1	0	0	0	0	1	0	0
AC016027.1	ENSG00000225335	3	1	4	1	1	3	0	0	0	0	1	0	2	1	2	4	3	0	2	4	1	4	2	7	5	3	1	2	1	6	6	0	2	0	0	1
AC016065.1	ENSG00000246089	51	45	69	47	38	27	4	2	5	6	11	14	32	25	45	29	17	16	22	64	14	39	27	25	23	49	42	42	20	39	53	1	4	2	1	2
AC016134.1	ENSG00000260926	0	0	1	0	0	0	0	0	0	0	0	0	0	0	0	0	0	0	0	0	0	0	0	0	0	0	0	0	0	0	0	0	0	0	0	0
AC016168.2	ENSG00000267568	0	0	0	0	0	0	0	0	0	0	0	0	0	0	0	0	0	0	0	0	0	0	0	0	0	0	0	0	0	0	0	0	0	0	0	0
AC016205.1	ENSG00000267374	56	37	30	23	7	30	5	1	0	0	1	12	19	23	12	8	4	6	14	31	8	27	26	28	10	34	17	12	24	30	8	0	4	0	1	2
AC016245.1	ENSG00000262833	0	0	2	1	0	0	0	0	0	0	0	0	0	0	0	0	1	0	0	0	0	0	1	1	0	0	0	0	0	0	0	0	0	0	0	0
AC016252.1	ENSG00000272609	0	0	1	0	1	3	0	0	0	0	1	2	1	1	0	1	0	0	0	2	0	2	0	2	0	0	1	1	0	3	1	0	0	0	0	0
AC016257.1	ENSG00000257999	0	1	2	0	0	0	0	0	1	0	0	0	2	0	0	0	0	1	1	0	0	0	1	0	0	1	0	1	0	0	1	0	0	0	0	0
AC016355.1	ENSG00000270964	1	0	4	4	1	3	0	0	0	0	1	3	5	3	6	4	2	5	3	5	4	5	2	1	3	1	0	1	1	3	9	1	1	0	0	0
AC016383.1	ENSG00000266335	0	0	0	0	0	0	0	0	0	0	0	0	0	0	0	0	0	0	0	0	0	0	1	0	0	0	0	0	0	0	0	0	0	0	0	0
AC016394.1	ENSG00000227540	23	11	22	17	6	22	0	2	2	0	3	8	11	13	13	18	4	9	20	20	11	22	23	27	9	26	27	31	18	24	31	0	12	5	0	1
AC016394.2	ENSG00000272599	22	11	18	20	14	15	2	0	1	0	4	3	11	11	23	18	4	7	13	14	7	13	16	18	1	5	9	10	6	7	23	2	1	1	0	2
AC016395.1	ENSG00000233590	0	0	0	0	0	0	0	0	0	0	0	0	1	0	0	0	0	0	0	0	0	0	0	0	0	0	0	0	0	0	0	0	0	0	0	0
AC016396.2	ENSG00000261076	0	0	0	0	1	0	0	0	0	0	0	0	0	0	0	0	0	0	0	0	0	0	0	0	0	0	0	0	0	0	2	0	0	0	0	1
AC016405.2	ENSG00000272043	1	0	0	1	1	0	0	0	0	0	0	0	0	0	0	0	0	0	0	1	0	0	0	0	0	0	0	0	0	0	0	0	0	0	0	0
AC016405.3	ENSG00000272384	1	1	0	1	0	0	0	0	0	0	1	0	1	2	0	0	0	0	0	0	0	0	0	1	0	3	0	0	0	1	1	0	0	0	0	0
AC016573.1	ENSG00000253968	0	0	0	0	0	0	0	0	0	0	0	0	0	0	0	0	0	0	0	0	0	0	0	0	1	0	0	0	0	0	0	0	0	0	0	0
AC016575.1	ENSG00000272057	1	0	1	1	0	3	0	0	0	0	0	1	1	0	0	0	0	0	1	3	1	4	0	5	0	2	2	6	1	1	11	0	0	0	2	0
AC016588.1	ENSG00000267124	0	0	0	0	0	0	0	0	0	0	0	0	0	0	0	0	0	0	0	0	0	0	0	1	0	0	0	0	0	0	0	0	0	0	0	0
AC016588.2	ENSG00000282393	22	15	32	22	10	25	1	0	1	0	2	3	12	5	26	27	6	10	5	9	7	21	10	7	6	19	7	15	7	12	17	1	3	1	0	2
AC016590.1	ENSG00000267605	0	0	0	1	0	0	0	0	0	0	0	0	0	0	0	0	0	0	0	0	0	0	0	0	0	0	0	0	0	0	0	0	0	0	1	0
AC016590.3	ENSG00000276846	1	0	0	2	0	1	0	0	0	0	0	0	0	1	0	0	0	0	0	0	0	0	0	0	0	1	0	0	1	0	1	0	0	0	0	0
AC016596.1	ENSG00000227908	3	3	6	2	0	6	0	0	1	0	1	0	4	2	1	2	0	0	1	7	2	5	3	8	1	3	2	5	2	7	10	1	1	0	1	0
AC016597.1	ENSG00000261329	0	0	0	0	0	0	0	0	0	0	0	0	0	0	0	0	0	2	0	0	0	0	0	0	0	0	0	0	0	0	0	0	0	0	0	0
AC016598.1	ENSG00000249429	0	0	0	0	0	0	0	0	0	0	0	0	0	1	0	0	0	0	0	0	0	0	0	0	0	0	0	0	0	0	0	0	0	0	0	0
AC016629.2	ENSG00000269600	2	0	0	0	0	1	0	0	0	0	0	0	0	0	0	0	0	0	0	1	0	0	0	0	0	0	0	0	0	0	0	0	0	0	0	0
AC016642.1	ENSG00000248475	0	1	0	0	0	0	0	0	0	0	0	0	0	0	0	0	0	0	0	0	0	0	0	0	1	0	0	0	0	0	0	0	0	0	0	0
AC016687.2	ENSG00000250723	0	0	0	0	0	0	0	0	0	0	0	0	0	0	0	0	0	0	6	5	1	1	0	0	1	0	0	0	0	0	0	0	0	0	0	0
AC016705.2	ENSG00000259495	6	1	1	0	2	2	0	1	0	0	0	1	1	0	0	0	1	0	0	0	0	0	1	0	2	1	1	0	0	3	0	0	0	0	0	0
AC016708.1	ENSG00000229267	4	2	2	1	3	4	1	0	2	0	0	1	2	1	0	2	2	2	2	1	1	5	4	6	0	3	5	4	1	2	0	0	2	0	0	1
AC016717.2	ENSG00000273301	6	4	5	3	2	2	0	0	0	0	1	0	0	1	1	0	0	0	0	0	0	0	0	0	0	0	0	0	0	0	0	0	0	0	0	0
AC016722.1	ENSG00000226548	0	1	1	0	1	0	0	0	0	0	1	0	0	0	0	0	0	1	1	1	1	2	1	0	0	1	0	0	0	0	2	0	1	0	0	0
AC016722.2	ENSG00000228925	0	0	0	1	1	0	0	0	0	0	0	0	0	1	0	0	0	0	0	0	1	0	1	1	0	1	1	1	0	0	0	0	0	0	0	0
AC016722.3	ENSG00000260977	1	3	1	6	2	3	0	1	0	0	2	0	4	3	7	4	3	1	5	3	0	4	7	3	1	3	4	1	2	2	11	0	4	0	0	1
AC016723.1	ENSG00000235335	0	0	0	0	0	0	0	0	0	0	0	0	0	0	1	0	0	0	0	0	0	0	0	0	0	0	0	0	0	0	0	0	0	0	0	0
AC016727.1	ENSG00000270820	2	9	5	5	9	11	1	0	1	1	2	6	3	5	7	14	5	4	2	16	2	7	6	8	1	4	7	6	3	4	8	0	0	0	0	1
AC016737.1	ENSG00000271151	1	0	1	0	0	2	0	0	0	0	0	0	0	1	1	0	0	1	1	0	0	0	0	0	0	2	0	0	1	2	0	0	1	0	0	0
AC016737.2	ENSG00000273258	0	0	1	0	0	0	0	0	0	0	0	0	1	0	0	0	0	0	0	0	0	0	0	0	0	0	0	0	0	0	0	0	0	0	0	0
AC016738.1	ENSG00000223947	0	1	3	0	0	0	0	0	0	0	0	0	1	0	0	0	0	0	0	0	0	0	0	0	0	0	0	0	0	0	0	0	0	0	0	0
AC016738.2	ENSG00000230140	0	0	0	0	0	0	0	0	0	0	0	0	3	0	0	3	0	2	0	0	0	0	0	0	0	0	1	2	0	0	0	0	0	0	0	0
AC016745.1	ENSG00000234997	0	0	0	0	0	0	0	0	0	0	0	0	0	0	0	0	0	0	0	0	0	0	0	0	0	1	0	0	0	0	0	0	0	0	0	0
AC016745.2	ENSG00000272563	5	2	3	3	3	7	0	0	0	0	0	4	3	1	4	2	1	0	4	3	1	0	0	3	4	15	14	12	10	26	17	0	1	0	0	0
AC016746.1	ENSG00000257045	0	0	0	0	0	0	0	0	0	0	0	0	0	0	0	1	1	0	2	1	0	0	1	0	2	1	2	0	2	1	1	0	0	0	0	0
AC016747.1	ENSG00000212978	158	151	106	112	111	136	13	9	5	13	55	62	175	191	137	152	107	73	128	251	57	108	120	132	157	251	138	154	165	318	551	21	42	15	15	30
AC016747.2	ENSG00000271889	0	0	0	0	0	0	0	0	0	0	0	0	0	0	0	0	0	0	0	0	0	1	0	0	0	0	0	0	0	1	0	0	0	0	0	0
AC016747.4	ENSG00000274769	1	1	3	3	1	2	0	0	0	0	1	1	2	1	4	2	2	1	1	2	1	0	2	2	0	5	2	2	0	3	0	0	0	0	0	0
AC016757.1	ENSG00000186235	2	3	22	16	2	13	0	0	3	0	0	6	0	3	22	11	3	6	0	3	4	7	1	9	1	0	6	5	4	18	2	0	2	0	0	4
AC016766.1	ENSG00000237844	0	2	0	0	0	0	0	0	0	0	0	1	0	0	0	0	0	0	0	0	0	0	0	0	0	0	0	0	0	0	0	0	0	0	0	0
AC016773.1	ENSG00000270195	8	6	12	7	4	10	0	0	2	2	1	1	6	5	2	9	6	3	8	10	4	17	18	15	1	8	8	13	8	12	19	1	5	0	0	1
AC016813.1	ENSG00000254321	0	1	0	0	0	0	0	0	0	0	0	1	2	0	3	1	1	0	0	0	0	0	0	0	0	0	0	0	0	0	0	0	0	0	0	0
AC016825.1	ENSG00000232767	0	0	0	0	0	0	0	0	0	0	0	0	0	0	0	0	0	0	0	0	1	2	0	1	0	0	0	0	0	0	0	0	0	0	0	0
AC016831.1	ENSG00000226380	8	12	35	34	33	12	0	0	1	1	5	1	5	9	6	7	10	2	59	120	36	59	75	89	40	72	103	90	45	102	70	7	19	5	3	11
AC016831.5	ENSG00000271204	4	5	7	7	13	7	1	0	2	0	5	1	2	8	12	6	3	1	31	30	5	23	20	16	30	83	70	80	47	71	135	9	28	7	3	10
AC016831.6	ENSG00000271522	0	0	0	0	0	0	0	0	0	1	0	0	0	1	1	0	1	1	1	1	0	0	0	0	0	0	0	0	1	0	1	0	0	0	0	0
AC016831.7	ENSG00000285106	2	2	16	10	15	6	0	2	0	1	0	0	1	7	10	6	2	1	30	47	19	25	40	40	30	72	69	96	28	86	61	6	14	6	1	7
AC016876.1	ENSG00000233223	15	22	19	15	8	12	0	0	4	2	6	7	17	19	20	19	18	7	16	44	11	24	27	28	7	16	16	13	18	20	33	1	5	1	3	3
AC016876.2	ENSG00000264772	61	48	73	52	52	65	1	0	3	3	11	19	33	29	53	27	29	24	40	68	25	71	68	87	27	92	84	60	41	83	118	5	28	9	5	3
AC016876.3	ENSG00000276384	1	0	4	0	2	2	0	0	0	0	0	0	0	1	2	0	1	0	0	0	0	0	0	0	0	0	3	0	2	1	2	0	0	1	0	0
AC016877.1	ENSG00000229625	0	0	0	0	0	0	0	0	0	0	0	0	0	0	0	0	0	0	0	0	0	0	0	0	0	0	0	0	1	0	4	0	0	0	0	0
AC016877.3	ENSG00000271930	1	0	0	0	0	1	0	0	0	0	0	0	0	0	0	0	0	1	0	0	0	0	0	0	0	0	0	0	0	0	2	0	2	0	0	0
AC016888.1	ENSG00000266036	0	0	0	0	0	0	0	0	0	0	0	0	0	0	0	0	0	0	0	0	0	0	0	0	0	0	0	0	0	0	0	0	0	0	0	0
AC016907.2	ENSG00000233862	0	0	0	0	0	0	0	0	0	0	2	0	0	1	2	0	0	1	0	0	0	0	1	0	0	0	1	0	1	0	3	0	0	0	0	0
AC016910.1	ENSG00000232377	0	0	0	0	0	2	0	0	0	0	0	0	0	1	0	0	0	0	0	0	0	0	0	0	1	0	0	0	0	0	0	0	0	0	0	0
AC016924.1	ENSG00000250934	0	0	0	1	0	0	0	0	0	0	0	1	0	0	0	0	0	0	0	0	0	0	0	0	0	0	0	1	0	0	0	0	0	0	0	0
AC016933.1	ENSG00000251471	0	0	0	0	0	0	0	0	0	0	0	0	0	0	1	0	0	0	0	0	0	0	0	0	0	0	0	0	0	0	0	0	0	0	0	0
AC016957.2	ENSG00000276136	4	3	6	3	6	7	0	0	0	3	3	2	3	0	1	5	1	2	1	8	5	1	5	3	1	0	3	2	3	2	2	0	0	0	0	0
AC016993.1	ENSG00000258178	0	0	0	1	0	0	0	0	0	0	0	0	0	0	0	0	0	0	0	0	0	0	0	0	0	0	0	0	0	0	0	0	0	0	0	0
AC016999.1	ENSG00000229915	0	0	0	0	0	0	0	0	0	0	0	0	0	0	0	0	0	0	0	0	0	0	0	0	0	0	0	0	0	1	1	0	0	0	0	0
AC017002.1	ENSG00000224959	1	4	2	3	2	3	0	0	0	1	0	0	0	1	2	0	0	0	1	4	3	0	2	4	0	0	5	2	0	0	0	0	1	0	0	0
AC017002.3	ENSG00000240350	3	2	3	2	3	1	0	2	0	1	2	3	0	2	1	0	3	0	6	1	4	2	2	2	2	5	3	8	5	3	5	2	2	0	1	0
AC017002.6	ENSG00000285016	0	0	2	0	1	0	0	0	0	0	0	0	0	2	0	1	0	0	0	0	0	0	0	0	0	0	0	0	0	0	0	0	0	0	0	0
AC017006.2	ENSG00000232696	0	0	1	0	0	0	0	0	0	0	1	0	0	0	0	0	0	0	0	0	0	0	0	0	0	0	0	0	0	0	0	0	0	0	0	0
AC017007.5	ENSG00000251126	0	0	0	0	0	0	0	0	0	0	0	0	0	0	0	0	0	0	0	0	0	0	0	0	0	0	0	1	2	0	0	0	0	0	0	0
AC017033.1	ENSG00000271709	0	1	0	0	0	0	1	0	0	0	1	4	0	1	0	0	0	1	7	17	6	6	28	15	3	9	2	3	2	4	12	0	1	0	1	5
AC017048.3	ENSG00000272551	1	0	0	0	0	0	0	0	0	0	0	0	0	0	0	0	1	1	2	0	1	0	2	2	1	1	1	0	0	2	5	0	1	0	0	0
AC017067.1	ENSG00000224549	0	0	0	0	0	0	0	0	0	0	0	0	0	0	0	0	0	0	1	0	0	0	0	0	0	0	0	0	0	0	0	0	0	0	0	0
AC017071.1	ENSG00000259915	3	3	2	3	4	7	0	1	0	1	0	2	6	3	6	7	4	5	5	3	2	3	3	6	0	0	6	5	5	5	3	0	1	0	0	1
AC017074.1	ENSG00000227359	0	2	0	0	1	0	1	0	0	0	0	0	0	0	1	0	0	1	0	1	0	0	0	0	0	1	1	0	0	1	0	0	0	1	0	0
AC017076.1	ENSG00000271947	2	2	6	7	0	1	0	0	0	0	0	1	0	0	0	1	0	1	0	1	0	0	0	0	0	0	0	0	0	0	1	0	0	0	0	0
AC017083.1	ENSG00000273064	13	17	26	11	6	23	1	0	2	0	0	2	3	5	10	4	4	2	9	10	7	7	7	6	4	6	8	9	9	9	9	0	5	1	1	0
AC017083.2	ENSG00000273275	2	3	11	5	2	7	0	0	1	0	1	0	2	3	6	2	3	2	1	3	2	5	5	7	2	3	1	3	3	3	3	0	2	0	0	0
AC017083.3	ENSG00000273398	1	0	1	2	0	2	0	0	0	0	0	0	0	0	0	1	0	1	1	2	1	1	2	0	0	0	0	0	0	0	0	0	0	0	0	0
AC017091.1	ENSG00000251339	0	0	0	0	0	0	0	0	0	0	0	0	0	0	0	0	0	0	1	0	0	0	0	0	0	0	0	0	0	0	0	0	0	0	0	0
AC017100.1	ENSG00000259985	21	18	17	19	20	17	1	0	0	2	4	2	8	15	10	10	11	7	8	16	12	21	15	15	1	7	7	7	2	7	7	0	1	0	0	0
AC017101.1	ENSG00000227227	0	0	0	0	0	0	0	0	0	0	0	0	0	0	0	0	0	0	0	0	0	0	0	0	0	0	0	0	0	1	0	0	0	0	0	0
AC017104.1	ENSG00000224376	1	1	6	2	2	0	0	1	0	0	1	0	0	5	1	0	1	2	2	5	2	3	3	1	2	1	0	1	1	1	0	0	0	0	0	0
AC017104.3	ENSG00000233538	1	0	0	0	0	1	0	0	0	0	0	0	0	0	0	0	1	0	1	2	0	0	0	0	0	0	1	0	0	0	0	0	0	0	0	0
AC018362.1	ENSG00000261684	3	1	13	2	2	2	0	0	0	0	0	0	3	2	2	2	0	1	5	15	7	11	12	10	0	3	3	2	1	0	0	0	0	0	0	0
AC018362.2	ENSG00000261822	2	1	0	1	0	2	0	0	0	0	0	0	1	1	0	1	0	1	1	0	2	2	2	1	0	3	1	1	0	3	0	0	1	0	0	0
AC018410.1	ENSG00000256746	0	0	0	0	1	0	0	0	0	0	0	0	0	0	0	0	0	0	0	0	0	0	0	0	0	0	0	0	0	0	0	0	0	0	0	0
AC018410.2	ENSG00000256897	0	0	0	0	0	0	0	0	0	0	0	0	0	0	0	0	0	0	1	0	1	0	0	0	0	0	0	0	0	0	0	0	0	0	0	0
AC018413.1	ENSG00000265778	5	4	3	6	3	4	0	0	0	0	0	1	4	9	9	10	2	5	5	9	3	3	1	6	2	4	1	0	2	3	6	0	1	0	0	0
AC018442.2	ENSG00000253539	0	0	1	0	0	0	0	0	0	0	0	0	0	0	0	0	0	0	0	0	0	0	0	0	0	0	0	0	0	0	0	0	0	0	0	0
AC018450.1	ENSG00000241679	0	0	0	0	0	0	0	0	0	0	0	0	0	0	0	0	1	0	0	0	0	0	0	0	0	0	1	0	0	0	0	0	0	0	0	0
AC018462.1	ENSG00000229839	1	0	0	0	0	1	0	0	0	0	0	0	0	0	0	0	0	0	0	0	0	0	0	0	0	0	0	0	0	0	0	1	0	0	0	0
AC018464.1	ENSG00000234520	0	0	0	0	0	0	0	0	0	0	0	0	15	15	28	17	11	7	4	25	2	6	8	0	13	15	14	10	4	26	3	0	0	0	0	0
AC018467.1	ENSG00000232451	0	0	0	0	0	0	0	0	0	0	0	0	0	0	0	0	0	0	0	0	0	0	0	0	0	1	1	0	0	1	0	0	0	0	0	0
AC018521.2	ENSG00000264019	0	0	0	0	0	0	0	0	0	0	0	0	0	1	1	0	1	0	1	0	0	0	1	0	0	0	0	1	0	0	0	0	0	0	0	0
AC018521.3	ENSG00000264243	0	0	0	0	0	1	0	0	0	0	0	0	0	0	0	0	0	0	0	0	0	0	0	0	0	0	0	0	0	1	0	0	0	0	0	0
AC018521.4	ENSG00000264701	1	1	1	0	0	1	0	0	0	0	0	0	1	4	0	2	0	0	0	0	0	0	0	0	0	0	0	0	0	0	0	0	0	0	0	0
AC018521.5	ENSG00000264920	52	31	68	47	56	54	5	8	10	7	25	37	200	226	296	234	87	84	79	150	49	89	90	59	49	103	73	71	82	97	136	9	27	1	4	7
AC018521.6	ENSG00000266601	0	0	0	0	0	0	0	0	0	0	0	0	0	0	1	0	0	0	0	0	0	0	1	0	0	0	0	0	0	0	0	0	1	0	0	0
AC018521.7	ENSG00000266821	0	0	0	0	0	0	0	0	0	0	0	0	2	0	0	1	0	0	1	1	0	0	0	0	0	0	0	0	1	0	1	0	0	0	0	0
AC018523.2	ENSG00000256206	0	0	0	0	0	0	0	0	0	0	0	0	0	0	0	0	0	0	0	0	0	0	0	0	0	1	0	0	0	0	0	0	0	0	0	0
AC018529.1	ENSG00000275178	0	0	0	1	3	0	0	0	1	0	0	0	0	0	0	0	1	0	0	1	0	0	0	0	0	0	0	0	0	0	1	0	0	0	0	0
AC018529.2	ENSG00000278330	0	0	2	1	0	0	0	0	0	0	0	0	0	0	0	0	0	0	0	0	0	0	1	0	0	0	0	0	0	0	0	0	0	0	0	0
AC018553.1	ENSG00000277559	0	0	0	1	0	0	0	0	0	0	0	0	1	4	6	4	0	3	1	1	0	1	0	0	3	8	7	7	4	9	7	1	1	0	1	0
AC018553.2	ENSG00000283689	0	0	0	0	0	0	0	0	0	1	0	0	0	0	0	0	0	0	0	0	0	0	0	0	0	0	0	1	0	1	1	0	0	0	0	0
AC018557.1	ENSG00000260465	2	3	1	1	1	1	0	0	0	0	0	1	1	0	2	2	0	0	3	4	0	1	0	1	0	1	1	0	0	0	1	0	0	0	0	0
AC018563.1	ENSG00000259280	3	2	4	6	0	6	1	0	0	1	1	1	0	0	0	0	2	1	2	3	0	1	0	1	0	1	0	0	0	0	0	0	1	0	0	0
AC018630.2	ENSG00000275778	0	0	1	1	0	0	0	0	0	0	0	0	0	0	0	0	1	0	0	0	1	0	0	0	0	0	0	0	0	0	1	0	0	0	0	0
AC018635.2	ENSG00000272915	3	0	0	1	0	0	0	0	0	0	0	0	0	0	1	0	0	0	0	0	0	0	2	0	0	1	0	0	0	0	0	0	0	0	0	0
AC018638.6	ENSG00000271344	5	4	5	6	8	0	0	2	1	0	2	2	11	4	12	16	3	5	3	14	3	1	8	9	6	12	7	8	8	8	7	0	3	1	0	1
AC018638.7	ENSG00000271553	1	2	8	4	3	10	0	0	0	0	1	4	9	2	7	7	5	4	6	3	2	5	5	5	2	7	5	9	15	9	4	0	3	0	0	0
AC018643.1	ENSG00000225144	0	0	0	0	0	0	0	0	0	0	0	0	0	0	0	0	0	0	0	0	0	0	0	0	0	0	0	1	0	1	0	0	0	0	0	0
AC018645.2	ENSG00000273014	8	22	8	5	7	11	1	1	3	0	0	8	9	6	12	14	6	11	8	33	3	14	25	18	6	22	20	16	10	15	16	0	2	1	2	2
AC018647.1	ENSG00000227544	0	0	1	2	1	1	2	1	0	0	1	1	360	208	321	324	64	133	0	0	0	0	0	0	0	0	0	0	0	0	0	0	0	0	0	0
AC018647.2	ENSG00000271122	33	37	51	43	42	43	3	3	7	8	16	19	89	111	119	135	63	60	31	65	13	38	40	49	31	66	58	58	61	84	76	2	18	4	2	5
AC018648.1	ENSG00000272905	0	1	2	1	1	1	0	0	0	0	0	0	1	1	0	2	1	0	1	1	3	1	1	0	1	0	0	4	1	0	1	0	0	0	0	0
AC018653.3	ENSG00000256967	0	0	0	0	0	0	0	0	0	0	0	1	1	0	0	1	0	0	0	0	0	0	1	0	0	0	0	0	0	0	0	0	0	0	0	0
AC018680.1	ENSG00000251567	1	0	0	0	0	0	0	0	0	0	0	0	0	0	0	0	0	0	0	0	0	0	0	0	0	0	0	0	0	0	0	0	0	0	0	0
AC018682.1	ENSG00000250116	0	0	0	0	0	1	0	0	0	0	1	0	0	0	0	0	0	0	0	1	1	0	0	0	0	0	0	0	0	1	1	0	0	0	0	0
AC018690.1	ENSG00000273306	2	0	1	2	4	3	0	0	0	0	0	0	1	2	1	3	1	0	2	4	0	4	2	1	1	3	3	0	0	0	2	1	0	0	0	0
AC018695.2	ENSG00000269898	0	0	1	0	0	0	0	0	0	0	0	0	0	0	0	0	0	0	0	0	0	0	2	0	0	0	0	0	0	0	0	0	0	0	0	0
AC018697.1	ENSG00000266573	0	0	0	0	0	0	0	0	0	0	0	0	0	0	1	0	0	0	0	0	0	0	0	0	0	0	0	0	0	0	0	0	0	0	0	0
AC018742.1	ENSG00000233005	0	0	0	0	0	0	0	0	0	0	0	0	0	0	0	0	0	0	0	0	0	0	0	0	0	0	0	0	0	1	0	0	0	0	0	0
AC018754.1	ENSG00000285190	1	0	1	0	0	0	0	0	0	0	0	0	0	0	1	0	0	0	0	0	0	0	0	0	0	0	0	0	0	0	0	0	0	0	0	0
AC018755.1	ENSG00000267808	0	0	0	0	0	0	0	0	0	0	0	0	0	0	0	0	0	0	0	0	0	0	0	0	1	0	0	0	0	0	0	0	0	0	0	0
AC018761.2	ENSG00000267062	1	3	5	1	2	0	0	0	0	0	0	0	1	1	2	0	1	2	1	4	0	5	2	2	0	1	0	1	0	0	0	0	0	0	0	0
AC018766.1	ENSG00000268047	0	0	0	0	0	0	0	0	0	0	0	0	0	0	0	0	0	0	0	0	0	0	0	0	0	0	0	0	0	0	0	0	0	0	0	0
AC018781.1	ENSG00000248599	0	0	0	0	0	0	0	0	0	0	0	0	1	2	2	1	0	1	0	1	0	0	0	0	0	0	0	0	0	0	0	0	0	0	0	0
AC018797.2	ENSG00000246560	31	19	28	12	18	25	0	0	2	1	5	10	32	26	33	26	17	9	13	22	6	25	21	21	6	22	17	17	11	25	29	1	11	1	1	2
AC018809.2	ENSG00000269982	1	4	5	2	3	0	0	1	0	0	1	1	5	1	3	1	1	0	0	2	1	1	5	1	2	4	9	9	3	8	4	0	1	0	0	3
AC018816.1	ENSG00000235978	0	0	0	1	0	1	0	0	0	0	1	2	3	9	1	1	5	2	1	7	4	4	4	7	4	10	3	9	3	2	6	0	1	0	0	2
AC018845.3	ENSG00000261173	1	0	1	0	0	0	0	1	0	0	0	0	0	3	0	1	0	2	0	4	1	2	2	1	0	0	1	0	1	3	1	0	0	0	0	0
AC018866.1	ENSG00000229774	0	0	0	0	0	0	0	0	0	0	0	0	0	0	0	0	0	0	1	0	1	1	2	5	0	0	0	0	0	0	28	1	3	3	1	1
AC018904.1	ENSG00000259250	0	0	1	0	0	0	0	0	0	0	0	0	0	0	0	0	0	0	0	0	0	0	0	0	0	1	0	0	0	0	0	0	0	0	0	0
AC018943.1	ENSG00000260624	0	0	0	0	0	0	0	0	0	0	0	0	0	0	0	0	0	0	0	0	0	0	0	0	0	0	0	1	0	0	0	0	0	0	0	0
AC018946.1	ENSG00000259177	0	0	0	0	0	0	0	0	0	0	0	0	0	0	0	0	0	0	0	0	0	0	1	0	0	0	0	0	0	0	0	0	0	0	0	0
AC018953.1	ENSG00000253583	0	0	0	0	0	0	0	0	0	0	0	0	0	0	0	0	0	0	0	0	0	0	0	0	0	0	0	0	0	0	0	0	0	0	0	0
AC019068.1	ENSG00000233611	7	0	0	0	0	0	0	0	0	0	0	1	0	0	0	0	0	0	1	0	0	3	0	1	0	0	0	0	1	0	0	0	0	0	0	0
AC019069.1	ENSG00000272711	26	12	17	18	12	16	2	0	4	5	3	5	17	11	19	27	5	9	3	5	7	13	14	22	1	12	11	11	4	10	33	0	6	1	2	3
AC019077.1	ENSG00000214559	1	6	6	5	5	5	0	0	0	0	0	3	0	3	9	1	3	0	2	11	4	2	7	6	3	4	1	6	1	2	5	0	0	0	0	0
AC019080.4	ENSG00000271996	2	0	0	0	0	1	0	0	0	0	0	0	0	1	4	1	1	0	0	0	0	0	0	0	0	1	0	0	0	0	1	0	0	0	0	0
AC019117.1	ENSG00000236039	0	0	0	0	0	0	0	0	0	0	0	0	0	0	0	0	0	0	0	1	0	0	0	2	0	0	0	0	0	0	0	0	0	0	0	0
AC019117.2	ENSG00000236318	0	0	1	1	0	1	0	0	0	0	0	0	0	1	0	0	0	0	1	3	0	0	0	1	0	1	0	0	0	0	0	0	0	0	0	0
AC019118.2	ENSG00000236760	0	0	1	0	0	3	0	0	0	0	0	0	0	0	0	0	0	0	0	0	0	0	0	0	0	0	0	1	0	1	0	0	0	0	0	0
AC019129.2	ENSG00000273106	1	0	1	1	0	1	0	0	0	0	0	0	0	0	1	3	0	0	2	0	0	0	1	0	0	0	0	1	0	1	1	0	0	0	0	0
AC019130.1	ENSG00000227033	0	0	1	0	0	0	0	0	0	0	0	0	0	0	0	0	0	0	0	0	0	0	0	0	0	0	0	0	0	0	0	0	0	0	0	0
AC019131.2	ENSG00000272777	13	6	3	3	3	4	1	0	0	0	1	1	14	2	4	1	0	1	19	5	2	5	2	3	5	6	3	4	5	1	27	0	1	0	1	0
AC019163.1	ENSG00000248980	0	0	0	0	0	0	0	0	0	0	0	0	0	0	0	0	0	0	1	0	0	0	0	0	0	0	0	0	0	0	0	0	0	0	0	0
AC019171.1	ENSG00000269210	1	3	5	7	1	6	0	0	0	1	0	2	1	0	3	0	4	1	0	0	1	2	0	0	1	5	5	15	8	7	9	2	4	2	1	1
AC019186.1	ENSG00000234584	1	0	3	1	1	0	0	0	0	0	0	0	1	1	0	0	0	2	1	0	1	1	0	0	0	1	2	1	2	2	1	0	1	0	0	0
AC019193.2	ENSG00000272784	0	0	0	1	0	0	0	0	0	0	0	0	0	0	0	0	2	0	0	0	0	0	0	0	0	0	0	1	0	1	0	0	0	0	0	0
AC019193.3	ENSG00000273180	0	0	1	0	0	0	0	0	0	0	0	0	0	0	0	0	0	0	0	0	0	0	0	0	0	0	0	0	0	0	0	0	0	0	0	0
AC019197.1	ENSG00000236283	2	1	1	0	1	0	0	0	0	0	0	0	0	0	1	2	0	0	0	0	0	0	0	0	1	0	0	0	0	0	0	0	0	0	0	0
AC019205.1	ENSG00000229852	27	28	28	18	15	21	1	3	2	3	4	9	38	50	57	35	34	15	20	25	16	26	32	22	18	56	55	70	35	55	32	0	9	1	3	3
AC019211.1	ENSG00000239498	0	0	0	0	0	0	0	0	0	0	0	0	0	1	0	0	0	0	0	0	0	0	0	0	0	0	0	0	0	0	0	0	0	0	0	0
AC019254.1	ENSG00000259182	0	0	0	0	0	0	0	0	0	0	0	1	1	0	0	0	0	0	1	0	0	0	0	0	0	5	0	0	0	0	0	0	0	0	0	0
AC019257.1	ENSG00000253764	3	1	0	0	0	0	0	1	0	0	0	1	0	0	0	0	0	1	0	0	0	0	0	0	0	0	0	0	0	0	0	0	0	0	0	0
AC019257.2	ENSG00000270988	0	1	0	2	0	1	0	0	0	0	0	2	0	0	2	0	0	1	0	0	0	0	0	0	0	0	0	0	0	0	0	0	0	0	0	0
AC019257.8	ENSG00000283239	0	0	0	0	0	0	0	0	0	0	0	0	0	0	0	0	0	0	0	0	0	0	1	0	0	0	0	0	0	0	0	0	0	0	0	0
AC019270.1	ENSG00000253932	0	0	1	0	0	1	0	0	0	0	1	1	0	0	0	0	0	0	0	0	1	0	0	1	0	0	0	0	0	0	0	0	1	0	0	0
AC019294.2	ENSG00000260288	1	2	3	1	0	2	0	0	0	0	1	0	4	1	3	1	1	1	1	3	1	1	1	1	1	2	0	0	0	1	2	0	0	0	0	0
AC020551.1	ENSG00000250993	0	0	0	0	1	0	0	0	0	0	0	0	0	0	0	0	0	0	0	0	0	1	0	0	0	0	0	0	0	0	0	0	0	0	0	0
AC020558.1	ENSG00000264666	0	1	0	0	0	1	0	0	0	0	0	0	1	0	0	0	2	0	0	2	0	1	0	0	0	0	3	1	1	0	0	0	0	0	0	0
AC020559.1	ENSG00000231842	0	0	0	0	0	0	0	1	0	0	0	0	0	1	0	0	0	0	0	0	1	0	0	0	0	0	0	0	1	0	0	0	0	0	0	0
AC020571.1	ENSG00000229056	0	0	2	0	5	1	0	0	0	0	0	0	0	0	0	0	0	0	16	11	9	11	8	2	1	4	20	4	1	3	1	0	0	0	0	0
AC020594.1	ENSG00000237133	0	0	3	1	0	0	0	0	0	1	0	1	0	0	0	2	0	0	0	1	0	0	1	2	0	2	0	0	0	0	1	0	0	0	0	0
AC020611.2	ENSG00000255886	0	0	0	0	0	1	0	0	0	0	0	0	0	0	0	0	0	0	0	0	0	0	0	0	0	0	0	1	0	0	0	0	0	0	0	0
AC020612.3	ENSG00000257964	0	0	1	0	0	0	0	0	0	0	0	0	0	0	0	0	0	0	0	0	0	0	0	0	0	0	0	0	0	0	0	0	0	0	0	0
AC020637.1	ENSG00000258231	3	0	1	1	2	0	0	0	0	0	0	0	0	0	0	1	0	0	0	0	0	0	0	0	0	0	0	0	0	0	1	0	0	0	0	0
AC020651.1	ENSG00000249474	0	0	0	0	0	0	1	0	0	0	1	0	0	1	1	1	0	0	2	0	0	0	0	2	0	0	0	0	0	0	0	0	0	0	0	0
AC020656.1	ENSG00000257764	3	1	1	1	1	1	0	0	0	1	0	0	3	1	6	3	0	1	0	2	2	0	2	1	0	2	0	1	0	2	1	0	1	0	0	1
AC020656.2	ENSG00000274979	0	0	0	0	0	0	0	0	1	0	0	0	0	0	0	0	0	0	0	0	0	0	0	0	0	0	0	0	0	0	0	0	0	0	0	0
AC020658.2	ENSG00000259198	0	0	0	0	0	0	0	0	0	0	0	0	0	0	0	0	0	0	0	0	0	0	0	0	0	0	0	0	0	0	0	0	0	0	0	0
AC020659.1	ENSG00000174171	0	0	1	0	0	0	0	0	0	0	1	0	0	5	3	3	1	1	0	2	0	0	0	1	0	0	0	2	0	0	0	0	0	0	0	0
AC020659.2	ENSG00000250379	0	0	0	0	0	0	0	0	0	0	0	0	0	0	0	0	0	0	0	0	0	1	0	0	0	0	0	0	0	1	0	0	0	0	0	0
AC020661.1	ENSG00000251161	3	0	0	0	0	0	0	0	0	0	0	0	0	0	0	1	0	0	0	1	0	0	2	1	1	0	0	1	0	0	0	0	0	0	0	0
AC020661.3	ENSG00000259617	0	0	0	0	1	0	0	0	0	0	0	0	0	0	0	0	0	1	1	2	1	0	2	1	0	0	0	1	0	0	0	0	0	0	0	0
AC020663.1	ENSG00000266994	0	0	1	0	0	0	0	0	0	0	0	0	0	0	0	0	0	0	0	0	0	0	0	0	0	0	0	0	0	0	0	0	0	0	0	0
AC020741.1	ENSG00000205682	1	2	1	2	1	2	0	0	0	0	2	3	1	0	1	1	3	3	0	1	0	0	0	1	0	1	1	2	1	0	1	0	0	0	0	0
AC020743.1	ENSG00000228005	0	0	0	0	0	0	0	0	0	0	0	0	0	0	0	0	0	0	0	0	0	0	0	0	0	0	0	0	0	1	0	0	0	0	0	0
AC020763.1	ENSG00000260156	0	0	0	0	0	0	0	0	0	0	0	0	0	0	1	0	0	1	0	0	0	0	0	1	0	0	2	0	0	0	0	0	0	0	0	0
AC020765.2	ENSG00000275441	17	6	8	8	7	15	0	2	1	0	0	1	0	7	7	2	7	3	3	12	3	5	2	7	2	10	5	8	5	8	1	2	2	0	1	2
AC020891.2	ENSG00000259306	1	1	0	2	1	2	0	0	0	0	0	0	0	2	1	1	0	0	1	0	0	0	0	0	0	0	1	0	0	0	0	0	0	0	0	0
AC020900.1	ENSG00000249180	0	0	0	0	0	0	0	0	0	0	0	0	0	0	1	0	0	0	0	0	0	0	0	0	0	1	0	0	0	0	0	0	0	0	0	0
AC020907.1	ENSG00000179066	1	1	0	0	0	0	0	0	0	0	0	0	0	0	0	0	0	0	0	0	0	0	0	0	0	0	0	0	0	1	1	0	0	0	0	0
AC020907.3	ENSG00000269303	0	0	1	0	0	1	0	0	0	0	0	0	0	0	0	2	1	0	0	0	0	0	0	1	0	0	0	1	0	0	0	0	0	0	0	0
AC020907.4	ENSG00000271032	0	0	1	2	0	0	0	0	0	0	0	0	0	0	0	0	0	0	0	0	0	0	0	0	0	0	0	0	0	0	0	0	0	0	0	0
AC020908.3	ENSG00000269066	0	0	0	0	0	0	0	0	0	0	0	0	0	0	0	0	0	0	0	0	0	0	0	0	0	0	0	0	0	0	0	0	0	0	0	0
AC020909.2	ENSG00000268518	4	5	5	2	1	3	5	2	2	3	19	24	1805	2302	2628	2131	363	941	0	0	0	0	0	0	0	0	0	1	1	0	0	0	1	0	0	0
AC020909.3	ENSG00000268854	2	0	2	1	1	1	0	0	0	0	1	1	2	1	4	2	1	2	0	4	1	0	1	1	0	0	2	0	0	0	1	0	0	0	0	0
AC020910.4	ENSG00000274104	6	4	16	2	6	7	3	0	1	1	0	2	7	6	8	11	3	6	4	7	1	5	4	7	1	9	9	12	7	7	13	0	2	2	0	1
AC020911.1	ENSG00000267033	0	3	3	0	0	0	0	0	0	0	0	1	1	1	0	2	0	0	1	4	0	3	1	1	0	1	0	0	1	0	0	0	0	0	0	0
AC020911.2	ENSG00000267275	2	6	0	4	2	3	0	0	0	0	0	0	1	2	1	0	1	0	2	2	1	1	3	0	0	1	1	4	0	3	0	0	0	0	0	0
AC020912.1	ENSG00000284430	0	0	0	0	0	0	0	0	0	0	0	0	0	0	2	2	0	0	0	2	0	1	1	0	0	0	0	0	1	0	1	0	0	0	0	0
AC020913.1	ENSG00000268056	0	0	0	0	0	0	0	0	0	0	0	0	0	0	1	0	0	0	0	2	0	0	1	1	0	1	0	0	0	0	0	0	0	0	0	0
AC020915.1	ENSG00000267216	2	3	6	6	3	6	0	0	0	1	1	1	4	2	2	1	3	2	4	8	2	3	5	3	2	6	2	4	4	4	3	0	1	0	0	0
AC020915.3	ENSG00000268516	122	116	241	132	217	153	5	8	27	23	77	39	66	59	111	97	90	43	83	116	62	67	124	81	35	70	64	55	59	100	109	2	14	2	1	5
AC020915.5	ENSG00000283515	0	0	0	0	0	0	0	0	0	0	0	0	0	0	0	0	0	0	0	0	0	0	0	0	0	1	0	0	0	0	0	0	0	0	0	0
AC020916.1	ENSG00000267519	23	25	32	22	13	20	3	0	2	1	7	2	15	21	12	21	2	3	37	86	42	53	75	55	25	73	91	99	65	96	104	6	28	7	4	14
AC020916.2	ENSG00000267582	0	0	0	0	0	0	0	0	0	0	0	0	0	0	2	0	0	0	0	0	0	0	0	0	0	0	0	0	0	0	1	0	0	0	0	0
AC020917.2	ENSG00000267703	0	0	0	0	0	0	0	0	0	0	0	0	0	1	0	0	0	0	0	0	0	2	0	0	0	0	0	0	1	0	0	0	0	0	0	0
AC020917.3	ENSG00000277825	2	7	14	4	8	3	0	0	0	0	0	1	3	3	3	1	0	3	1	3	1	2	3	0	0	4	0	2	2	2	4	0	0	0	0	0
AC020922.1	ENSG00000267706	0	0	0	0	0	0	0	0	0	0	0	0	1	1	0	0	1	0	1	2	1	2	0	0	0	1	1	0	0	1	0	0	0	0	0	0
AC020922.2	ENSG00000268729	0	0	0	0	0	0	0	0	0	0	0	0	0	0	0	0	0	0	0	0	0	0	0	1	0	0	0	0	0	0	0	0	0	0	0	0
AC020922.4	ENSG00000276831	0	0	0	0	0	1	0	0	0	0	0	1	5	2	7	4	3	0	0	0	0	0	0	0	0	1	1	0	0	0	1	0	0	0	0	0
AC020928.1	ENSG00000267254	25	20	51	23	26	26	2	1	0	1	1	6	15	4	22	8	4	3	11	21	6	12	20	7	1	18	10	15	9	14	8	0	6	3	1	1
AC020928.2	ENSG00000267260	23	9	21	11	24	11	0	0	0	0	5	2	4	2	5	1	5	1	5	10	1	1	2	1	0	0	1	1	2	0	4	0	0	0	0	0
AC020928.3	ENSG00000267353	2	1	1	2	0	0	0	0	0	0	0	0	0	1	0	1	0	0	2	1	0	0	1	0	1	1	0	0	1	1	0	0	0	0	0	0
AC020934.1	ENSG00000267424	0	2	2	2	1	1	0	0	0	0	0	0	0	0	1	0	1	0	0	2	0	1	0	0	0	0	0	0	0	1	0	0	0	0	0	0
AC020978.2	ENSG00000260441	0	0	1	0	0	0	0	0	0	0	0	0	0	0	0	1	0	0	0	0	0	0	0	0	0	0	0	0	0	0	0	0	0	0	0	0
AC020978.5	ENSG00000262160	4	0	5	2	3	1	0	0	0	0	0	1	0	4	1	1	0	0	0	2	0	1	0	3	0	0	0	0	0	0	0	0	0	0	0	0
AC021006.2	ENSG00000255388	0	0	0	0	0	0	0	0	0	0	0	0	1	0	0	0	0	0	0	0	0	0	0	0	0	0	0	0	0	0	0	0	0	0	0	0
AC021016.3	ENSG00000273361	2	0	0	3	2	0	0	0	0	0	0	0	1	3	1	2	1	1	3	7	3	5	5	3	4	3	5	4	6	5	7	0	2	1	1	0
AC021028.1	ENSG00000226659	1	0	1	0	0	0	0	0	0	0	0	0	0	0	0	0	0	0	0	0	0	0	0	0	0	0	0	0	0	1	2	0	0	0	0	0
AC021054.1	ENSG00000177406	3	3	9	2	4	12	0	1	0	2	0	0	11	4	14	10	5	3	7	1	8	3	7	4	5	11	1	4	12	17	19	0	2	0	1	0
AC021072.1	ENSG00000283536	0	0	0	0	0	0	0	0	0	0	0	0	0	0	0	0	0	0	0	0	0	0	0	0	0	0	0	0	0	0	0	0	0	0	0	0
AC021078.1	ENSG00000230551	213	196	331	240	194	201	12	14	19	19	51	67	194	194	311	220	123	113	198	329	126	237	279	274	86	263	207	224	150	201	242	18	70	11	13	21
AC021086.1	ENSG00000247877	2	2	4	3	5	1	0	0	0	0	0	2	8	5	5	5	0	1	6	4	4	3	4	3	3	2	3	3	2	4	4	0	0	0	2	0
AC021087.1	ENSG00000248925	0	1	0	0	1	0	0	0	0	0	0	1	0	1	1	3	1	0	1	1	0	0	1	1	0	0	1	0	0	0	1	0	0	0	0	0
AC021087.3	ENSG00000260774	14	10	16	10	14	16	1	0	0	0	2	4	9	6	12	11	7	9	12	14	6	10	11	17	8	23	18	25	19	16	24	1	4	1	0	2
AC021088.1	ENSG00000250619	0	1	0	0	0	0	0	0	0	0	0	0	0	0	0	0	0	0	0	0	0	0	0	0	0	0	0	0	0	0	0	0	0	0	0	0
AC021092.1	ENSG00000186019	17	8	18	14	10	3	0	0	0	0	3	1	13	23	19	12	7	3	16	17	4	6	6	9	4	11	6	7	2	5	18	2	3	1	1	1
AC021097.1	ENSG00000272661	5	6	8	5	3	8	0	0	1	0	3	4	9	4	10	6	2	5	10	20	4	13	9	12	1	21	18	23	11	13	33	0	6	0	2	1
AC021097.2	ENSG00000285480	0	0	0	0	0	0	0	0	0	0	0	0	0	0	0	0	0	0	0	0	1	0	0	0	0	0	0	0	0	0	0	0	0	0	0	0
AC021127.1	ENSG00000248719	0	0	0	0	0	0	0	0	0	0	0	0	0	0	0	0	0	0	1	0	0	0	0	1	0	2	0	0	0	0	0	0	0	0	0	0
AC021151.1	ENSG00000251445	0	0	1	0	0	0	0	0	0	0	0	0	0	0	0	0	0	0	0	0	0	0	0	0	0	0	0	0	0	0	0	0	0	0	0	0
AC021180.1	ENSG00000250532	0	1	0	0	0	0	0	0	0	0	0	0	0	0	0	0	0	0	0	0	0	0	0	0	0	0	0	0	0	0	0	0	0	0	0	0
AC021188.1	ENSG00000230747	1	1	1	0	4	0	0	0	0	0	1	2	0	0	0	0	1	0	0	0	1	1	1	2	0	0	0	0	0	0	0	1	0	0	0	0
AC021205.3	ENSG00000273007	0	0	3	2	0	1	0	0	0	0	1	3	0	0	2	1	1	0	0	1	0	1	2	2	0	1	1	2	2	1	2	0	0	0	0	1
AC021218.1	ENSG00000204876	0	0	0	0	0	0	0	0	0	0	0	0	0	0	0	0	0	0	1	0	0	0	0	2	0	1	1	1	1	0	0	0	0	0	0	0
AC021224.1	ENSG00000262477	0	0	0	2	1	0	0	0	0	0	0	0	0	0	0	0	0	0	1	2	1	0	0	0	0	0	0	0	0	0	0	0	1	0	0	0
AC021231.1	ENSG00000259336	0	2	0	0	0	0	0	0	0	0	0	0	0	0	0	0	1	0	0	0	0	0	0	0	0	0	0	0	0	1	0	0	0	0	0	0
AC021237.1	ENSG00000250267	0	1	0	0	0	0	0	0	0	0	0	1	0	2	1	0	0	0	0	0	0	0	0	0	0	0	0	0	0	0	0	0	0	0	0	0
AC021242.3	ENSG00000272267	1	3	3	3	0	4	0	0	0	1	0	1	2	0	0	2	1	1	3	1	3	0	1	1	1	0	6	2	2	6	3	0	0	0	2	0
AC021321.1	ENSG00000271966	5	3	14	5	3	7	0	0	0	0	4	2	4	6	4	5	5	6	5	3	2	7	5	6	1	3	4	4	4	6	6	0	0	0	1	1
AC021422.1	ENSG00000278370	1	0	1	0	0	0	0	0	0	0	0	0	0	0	0	0	0	0	0	0	0	0	0	0	0	0	0	0	0	0	0	0	0	0	0	0
AC021483.1	ENSG00000259548	0	0	0	0	0	0	0	0	0	0	0	0	0	1	0	1	0	0	0	0	0	0	0	0	0	0	0	0	0	0	0	0	0	0	0	0
AC021483.2	ENSG00000261229	0	0	0	0	0	0	0	0	0	0	0	0	2	0	1	0	3	0	2	0	2	0	0	0	0	1	1	0	1	2	0	0	0	0	0	0
AC021491.2	ENSG00000250286	0	1	0	0	0	0	0	0	0	0	0	0	0	0	0	1	0	0	0	0	0	1	0	0	0	1	0	1	0	1	1	0	0	0	0	0
AC021491.4	ENSG00000275897	0	1	1	0	0	2	0	0	0	0	0	0	0	0	0	0	0	0	0	1	0	1	1	0	0	0	0	0	0	1	0	0	0	0	0	0
AC021504.1	ENSG00000267313	15	39	11	9	5	0	3	8	1	1	13	0	15	37	4	2	7	1	11	23	4	4	1	1	1	3	1	1	6	1	0	0	0	0	0	0
AC021506.1	ENSG00000266460	0	0	0	0	0	0	0	0	0	0	0	0	0	0	0	0	0	1	0	0	0	0	0	0	0	0	0	0	0	0	0	0	0	0	0	0
AC021546.1	ENSG00000254041	0	0	0	0	0	0	0	0	0	0	0	0	0	0	1	0	0	0	0	2	0	0	0	0	0	0	0	0	0	1	0	0	0	0	0	0
AC021549.1	ENSG00000266521	0	1	0	0	0	0	0	0	0	0	0	0	0	0	1	1	0	0	0	1	0	0	0	0	0	0	0	0	0	0	1	0	0	0	0	0
AC021594.2	ENSG00000267780	0	0	0	0	0	0	0	0	0	0	0	1	1	0	0	1	0	0	0	0	0	0	0	0	0	0	0	0	0	0	0	0	0	0	0	0
AC021683.2	ENSG00000267506	11	4	2	5	0	1	0	0	0	0	0	0	0	0	0	0	0	0	0	0	0	0	0	0	0	0	0	0	0	0	0	0	0	0	0	0
AC021683.3	ENSG00000267665	0	0	1	0	2	0	0	0	0	0	0	0	0	0	0	0	0	0	0	0	0	0	0	0	0	0	0	0	0	0	0	0	0	0	0	0
AC021739.2	ENSG00000259407	4	1	4	2	1	2	0	0	0	0	0	0	3	1	2	1	1	0	2	7	0	5	4	3	1	2	1	1	1	1	1	0	0	0	0	0
AC021739.3	ENSG00000259416	1	1	1	0	0	2	0	0	0	0	0	0	0	0	1	0	1	2	0	2	0	1	1	1	0	0	0	0	0	1	0	0	0	0	0	0
AC021739.4	ENSG00000259544	0	0	0	0	0	0	0	0	0	0	0	0	0	0	0	2	0	0	0	0	0	0	0	1	0	1	0	0	0	0	0	0	0	0	0	0
AC021752.1	ENSG00000273674	1	3	2	0	1	1	0	0	1	0	1	0	0	3	1	2	0	0	0	0	0	2	0	0	0	1	0	0	0	1	0	0	0	0	0	0
AC021755.3	ENSG00000275636	0	0	0	0	0	0	0	0	0	0	0	0	4	2	3	0	0	2	1	1	0	0	0	0	0	1	0	0	0	0	1	0	0	0	0	0
AC021818.1	ENSG00000259309	0	0	0	0	0	0	0	0	0	0	0	0	0	0	0	1	0	0	0	0	0	0	0	0	0	0	0	0	0	0	0	0	0	0	0	0
AC021851.1	ENSG00000272800	2	2	11	2	2	3	0	2	0	0	0	0	1	1	2	1	2	2	0	3	2	1	2	3	2	3	2	5	1	4	7	0	0	0	0	0
AC021915.2	ENSG00000254314	0	0	0	0	0	0	0	0	0	0	0	0	0	1	0	0	0	0	0	0	0	0	0	0	0	0	0	0	0	0	1	0	0	0	0	0
AC022001.2	ENSG00000271716	0	0	1	0	0	0	0	0	0	0	0	0	0	0	0	0	0	0	1	0	1	0	0	0	0	0	0	0	1	0	0	0	0	0	0	0
AC022001.3	ENSG00000272483	3	1	1	1	1	2	0	0	0	0	0	0	0	0	0	0	0	0	0	0	0	0	0	0	0	0	0	2	3	4	0	0	0	0	0	0
AC022007.1	ENSG00000206567	5	4	5	2	5	5	0	1	0	1	1	1	4	2	4	3	2	2	4	8	1	4	0	3	1	4	0	1	6	3	5	0	1	0	0	0
AC022021.1	ENSG00000282996	1	0	0	0	0	1	0	0	0	0	0	0	0	1	0	0	0	0	0	0	0	0	0	0	0	0	0	0	0	0	0	0	0	0	0	0
AC022028.2	ENSG00000270002	0	0	1	0	0	0	0	0	0	0	0	0	0	0	0	0	0	0	0	0	0	0	0	0	0	0	0	0	0	0	0	0	0	0	0	0
AC022031.2	ENSG00000267284	0	1	1	1	0	0	0	0	0	0	0	0	0	1	2	0	0	0	1	1	0	0	1	0	0	0	0	0	0	0	0	0	0	0	0	0
AC022034.2	ENSG00000237807	0	0	0	0	0	0	0	0	0	0	0	0	2	0	2	1	0	1	1	0	2	0	0	1	0	1	0	0	3	3	5	1	1	0	1	1
AC022035.1	ENSG00000263637	0	0	0	0	1	0	0	0	0	0	0	0	0	0	0	0	0	0	0	0	0	0	0	0	0	0	0	0	0	0	0	0	0	0	0	0
AC022075.1	ENSG00000245648	2	1	8	8	5	3	4	1	2	6	8	5	5	0	16	8	3	5	15	8	12	21	12	10	4	10	8	10	9	16	6	0	1	0	0	0
AC022075.2	ENSG00000256155	0	0	0	0	0	0	0	1	0	0	0	0	0	0	0	0	0	0	0	0	0	0	0	0	0	0	0	0	0	0	0	0	0	0	0	0
AC022075.3	ENSG00000256288	0	0	0	1	0	0	0	0	0	0	0	0	0	1	0	2	1	0	1	0	0	0	0	0	1	0	0	0	0	0	0	0	0	0	0	0
AC022079.2	ENSG00000278733	1	0	1	0	0	0	0	0	0	0	0	0	0	1	0	0	0	0	0	0	0	0	0	0	0	2	0	0	0	1	0	0	0	0	0	0
AC022081.1	ENSG00000256513	0	0	0	0	0	0	0	0	0	0	0	0	0	0	0	0	0	0	0	0	0	0	0	0	0	0	0	0	0	0	2	0	0	0	0	0
AC022087.1	ENSG00000259715	3	4	3	3	2	1	0	2	1	1	0	0	4	4	2	2	0	0	1	3	2	2	4	2	0	3	3	1	0	3	6	0	0	0	0	0
AC022092.1	ENSG00000249639	0	0	0	0	0	0	0	0	0	0	0	0	0	0	0	0	0	0	0	0	0	0	0	0	0	0	0	0	0	0	2	0	0	0	0	0
AC022098.1	ENSG00000267169	14	23	23	13	20	28	0	1	3	1	5	2	16	9	20	14	13	7	20	34	24	18	46	45	18	26	23	26	13	28	33	0	9	0	0	2
AC022098.3	ENSG00000267783	0	0	0	1	0	0	0	0	0	0	0	0	1	0	1	0	1	0	0	0	0	0	1	0	0	2	1	0	0	0	0	0	0	0	0	0
AC022098.4	ENSG00000275091	0	1	4	0	1	1	0	0	1	0	0	2	1	0	1	2	1	0	0	0	0	2	0	1	1	2	1	0	1	2	4	0	0	0	0	0
AC022101.1	ENSG00000250328	0	0	0	0	0	0	0	0	0	0	0	0	0	0	0	0	0	0	0	0	0	1	0	0	0	0	0	0	0	0	0	0	0	0	0	0
AC022126.1	ENSG00000248898	0	1	0	0	0	0	0	0	0	0	0	0	0	0	0	0	0	1	0	0	0	0	0	0	0	0	0	0	0	0	0	0	0	0	0	0
AC022140.1	ENSG00000248605	0	0	0	1	0	1	0	0	0	0	0	0	0	1	1	0	0	1	0	0	0	0	0	1	0	0	1	0	0	0	1	0	0	0	0	0
AC022144.1	ENSG00000267892	22	36	75	52	44	46	3	0	1	1	3	4	17	13	43	43	14	8	17	9	15	24	34	22	11	18	18	11	14	17	8	0	2	1	0	0
AC022148.1	ENSG00000180458	1	4	1	1	2	2	0	0	0	0	0	0	2	0	0	0	0	0	2	1	1	0	0	0	0	1	4	1	0	0	0	0	0	0	0	0
AC022148.2	ENSG00000267115	0	1	0	0	0	0	0	0	0	0	0	0	0	0	0	0	0	0	0	1	0	0	0	1	0	0	0	0	0	0	0	0	0	0	0	0
AC022150.1	ENSG00000268886	0	0	0	0	0	0	0	0	0	0	0	0	0	0	0	0	0	0	0	0	0	0	0	0	0	0	0	0	1	0	0	0	0	0	0	0
AC022154.1	ENSG00000268093	1	0	1	1	0	2	0	0	0	1	1	0	0	2	2	1	0	0	2	3	0	0	0	0	0	0	0	2	2	2	2	0	0	0	0	0
AC022165.1	ENSG00000261243	0	0	0	0	0	0	0	0	0	0	0	0	0	0	0	0	0	0	0	1	0	0	0	0	0	1	0	0	0	0	0	0	0	0	0	0
AC022167.1	ENSG00000259939	1	2	2	2	1	1	0	0	1	0	1	0	2	1	2	0	0	1	1	1	0	0	0	1	1	1	2	1	2	1	1	0	0	0	0	1
AC022167.2	ENSG00000260276	5	6	6	3	8	6	0	0	0	0	0	1	6	2	9	4	1	2	1	6	1	2	1	3	1	1	1	4	1	1	3	0	0	0	0	0
AC022167.3	ENSG00000260979	0	0	0	0	0	0	0	0	0	0	0	0	5	6	6	2	1	2	0	0	0	1	1	0	0	0	0	0	1	2	1	0	0	0	0	0
AC022167.4	ENSG00000261481	0	0	1	3	0	2	0	0	0	0	0	0	0	2	2	0	0	1	0	1	0	1	0	1	0	0	1	1	0	0	2	0	0	0	0	0
AC022167.5	ENSG00000283516	1	0	0	0	0	0	0	0	0	0	0	0	0	0	0	1	1	0	0	0	0	0	0	0	0	0	0	0	0	1	0	0	0	0	0	0
AC022173.1	ENSG00000237243	0	0	0	1	0	0	0	0	0	0	0	0	0	0	0	0	0	0	0	0	0	0	0	0	0	0	0	0	0	0	0	0	0	0	0	0
AC022182.1	ENSG00000254777	0	0	0	0	0	1	0	0	0	0	0	0	7	11	12	5	6	2	1	5	1	0	0	0	1	1	0	0	0	0	1	0	0	0	0	0
AC022182.2	ENSG00000254802	0	0	0	1	0	0	0	0	1	0	0	0	0	1	0	1	1	0	2	0	0	0	0	0	6	9	2	6	4	12	0	0	0	0	0	0
AC022188.1	ENSG00000276807	1	0	0	0	0	0	0	0	0	0	0	0	0	0	0	0	0	0	0	0	0	0	0	0	0	0	0	0	0	0	0	0	0	0	0	0
AC022201.2	ENSG00000233849	0	0	0	0	0	0	0	0	0	0	0	0	0	0	0	0	0	0	0	0	1	0	0	1	0	1	0	0	0	0	3	0	0	0	0	0
AC022211.2	ENSG00000263843	11	4	7	1	2	11	0	0	0	0	1	2	0	0	1	6	0	1	8	5	5	6	4	5	1	2	2	3	0	0	5	0	1	0	1	0
AC022217.2	ENSG00000253295	0	0	0	0	0	0	0	0	0	0	0	0	0	0	0	0	0	0	0	0	0	0	0	0	0	0	0	0	0	0	0	0	0	0	0	0
AC022217.3	ENSG00000253736	0	0	0	1	0	0	0	0	0	0	0	0	0	0	0	0	0	0	1	0	0	0	0	0	0	0	0	0	0	0	0	0	0	0	0	0
AC022239.1	ENSG00000269954	0	0	0	1	0	0	1	0	1	0	0	0	0	1	0	0	0	0	9	4	3	5	1	2	0	0	0	0	0	0	8	0	0	0	0	0
AC022272.1	ENSG00000250027	1	0	0	0	0	1	0	0	0	0	0	0	0	0	0	0	0	0	0	0	0	0	0	0	0	0	0	0	0	0	0	0	0	0	0	0
AC022274.1	ENSG00000253712	0	0	0	0	0	0	0	0	1	0	0	0	0	1	0	0	0	0	0	0	0	1	0	0	0	0	0	0	0	0	0	0	0	0	0	0
AC022296.3	ENSG00000272832	0	0	1	0	0	0	0	0	0	0	0	0	1	0	0	0	0	0	0	0	0	1	0	0	0	0	0	0	0	0	0	0	0	0	0	0
AC022306.2	ENSG00000275580	8	8	17	9	12	7	1	1	0	0	4	4	6	6	4	6	2	7	6	11	2	9	2	10	6	5	14	6	3	3	3	0	1	0	0	0
AC022364.1	ENSG00000247934	0	2	2	0	1	1	0	0	0	1	1	0	5	5	7	4	0	2	1	6	1	3	1	8	2	5	7	3	5	3	5	0	1	0	0	0
AC022382.1	ENSG00000269886	2	1	1	5	1	4	1	1	0	0	1	1	3	6	7	1	3	0	1	3	0	3	1	1	0	1	2	6	0	4	0	0	0	0	1	0
AC022384.1	ENSG00000272410	0	0	0	0	0	0	0	0	0	0	0	0	0	0	0	0	0	0	0	0	0	1	0	1	0	0	0	0	1	0	0	0	0	0	0	0
AC022390.1	ENSG00000254271	0	0	0	0	0	0	0	0	0	0	0	0	0	0	0	0	0	0	0	0	0	0	1	0	0	0	0	0	0	0	0	0	0	0	0	0
AC022395.1	ENSG00000231104	0	0	0	0	0	0	0	0	0	0	0	0	0	0	0	0	0	0	0	0	0	0	0	0	0	0	0	1	0	0	0	0	0	0	0	0
AC022398.1	ENSG00000233643	0	0	0	2	0	1	0	0	0	0	0	0	0	0	1	0	0	0	0	1	0	0	0	0	0	0	0	0	0	0	0	0	0	0	0	0
AC022400.3	ENSG00000242288	1	0	0	0	0	1	0	0	0	0	0	0	1	0	0	1	0	0	0	0	0	0	1	0	0	0	0	0	0	0	0	0	0	0	0	0
AC022400.5	ENSG00000271816	1	1	2	0	1	0	0	0	0	0	0	0	1	0	0	1	0	1	0	1	0	1	1	0	0	1	3	2	0	2	1	0	1	0	0	0
AC022400.6	ENSG00000272140	1	3	1	2	1	3	2	0	0	0	0	1	2	3	3	2	0	3	0	3	0	0	2	1	0	3	1	2	0	3	1	0	0	0	0	0
AC022400.7	ENSG00000272916	0	0	0	0	0	0	0	0	0	0	0	0	0	0	1	0	0	0	0	1	0	0	0	0	1	0	0	0	0	0	2	0	0	0	0	0
AC022445.1	ENSG00000233847	0	0	0	0	0	0	0	0	0	0	0	0	0	0	0	0	0	0	0	0	0	0	0	0	0	0	0	0	0	0	0	0	0	0	0	0
AC022509.1	ENSG00000255750	0	0	1	0	0	0	0	0	0	0	0	0	0	2	1	2	1	0	0	0	0	1	0	0	0	0	1	0	0	0	0	0	0	0	0	0
AC022509.2	ENSG00000256234	0	0	3	1	0	0	0	0	0	0	0	0	0	0	0	0	0	0	0	0	0	0	0	0	0	0	0	0	0	0	0	0	0	0	0	0
AC022509.3	ENSG00000256894	0	0	0	0	2	0	0	0	0	0	0	0	0	0	0	0	0	0	0	2	0	0	0	1	0	0	0	1	0	1	0	0	1	0	0	1
AC022509.4	ENSG00000278095	0	2	0	0	0	2	0	0	0	0	0	0	0	0	0	0	0	0	0	0	0	0	0	0	0	0	0	0	0	0	0	0	0	0	0	0
AC022517.1	ENSG00000267550	1	2	0	1	1	3	0	0	0	0	0	0	1	2	1	2	1	1	0	1	0	1	0	1	0	2	1	0	1	0	1	0	0	0	0	0
AC022535.1	ENSG00000230096	1	0	0	0	0	0	0	0	0	0	0	0	0	0	0	0	0	0	0	0	0	0	0	0	0	0	0	0	0	0	0	0	0	0	0	0
AC022537.1	ENSG00000231132	0	0	1	0	0	0	0	0	0	0	0	0	0	0	0	0	0	1	0	0	0	0	0	0	0	0	0	0	0	0	0	0	0	0	0	0
AC022540.1	ENSG00000232342	2	0	1	1	0	1	1	0	0	0	0	0	1	1	0	0	0	0	2	0	1	0	1	0	1	0	0	0	0	0	1	0	0	0	0	0
AC022558.2	ENSG00000259805	0	0	0	1	0	0	0	0	0	0	0	0	0	0	2	0	0	0	0	0	0	1	0	0	0	0	1	0	1	0	0	0	0	0	0	0
AC022558.3	ENSG00000273747	1	1	0	0	0	0	0	0	0	0	0	0	0	0	0	0	0	1	0	0	0	0	0	0	0	1	0	0	0	0	0	0	0	0	0	0
AC022568.1	ENSG00000253474	0	0	0	0	0	0	0	1	0	0	0	0	0	0	0	1	0	0	0	0	0	0	0	0	0	0	0	0	0	0	0	0	0	0	0	0
AC022601.1	ENSG00000268873	0	0	0	0	0	0	0	0	0	0	0	0	0	0	0	0	0	0	2	0	0	0	0	1	0	0	0	0	1	0	0	0	1	0	0	0
AC022613.1	ENSG00000256802	17	33	33	37	23	21	3	2	4	4	18	13	13	18	39	24	38	10	138	295	63	151	108	94	61	151	128	106	170	235	35	1	9	1	3	1
AC022613.2	ENSG00000259523	5	4	3	3	2	3	0	0	0	1	4	0	2	4	3	4	3	0	4	1	0	2	3	4	2	3	4	2	2	3	4	0	1	1	1	1
AC022639.1	ENSG00000253554	0	0	0	0	0	0	0	0	0	0	0	0	0	0	0	1	0	0	0	0	0	0	0	0	1	0	0	0	0	0	0	0	0	0	0	0
AC022679.1	ENSG00000253857	0	0	0	0	1	0	0	0	0	0	0	0	0	0	0	0	0	0	0	0	0	0	0	0	0	0	0	0	0	0	0	0	0	0	0	0
AC022706.1	ENSG00000267364	0	0	0	0	0	0	0	0	0	0	0	0	3	1	1	2	1	0	0	0	0	0	0	0	0	0	0	0	0	1	0	0	0	0	0	0
AC022710.1	ENSG00000259356	0	0	0	0	0	0	0	0	0	0	0	0	1	0	0	0	0	0	0	0	0	0	0	0	0	0	0	0	0	0	0	0	0	0	0	0
AC022730.4	ENSG00000253967	0	0	0	0	0	0	0	0	0	0	0	0	0	0	0	0	0	0	0	0	0	0	0	0	1	0	3	1	1	0	2	0	0	0	2	0
AC022733.2	ENSG00000254143	0	0	0	0	1	0	0	0	0	0	0	0	0	0	0	0	0	0	0	0	0	0	0	0	0	0	0	0	0	0	0	0	0	0	0	0
AC022762.2	ENSG00000267940	4	5	4	6	5	2	0	0	0	0	0	0	2	1	4	0	0	1	0	0	1	1	0	1	1	1	2	1	5	1	3	0	2	0	0	0
AC022778.1	ENSG00000254060	0	0	0	0	1	0	0	0	0	0	0	0	0	0	0	0	0	0	0	0	0	0	0	0	0	0	0	0	0	0	0	0	0	0	0	0
AC022784.1	ENSG00000248538	2	1	4	2	0	0	0	2	0	1	1	0	0	0	1	2	2	0	2	14	0	2	2	1	0	0	0	0	0	0	0	0	0	0	0	0
AC022784.2	ENSG00000253252	0	1	0	0	0	0	0	0	0	0	0	0	0	0	0	0	0	0	0	0	0	0	0	0	0	0	0	0	0	0	0	0	0	0	0	0
AC022784.3	ENSG00000253426	1	1	4	7	7	1	0	1	0	1	1	1	5	1	14	14	3	5	2	0	0	1	1	1	1	0	1	1	0	5	1	0	0	0	0	0
AC022784.6	ENSG00000254235	1	1	0	0	0	1	0	0	0	0	0	0	0	0	0	0	0	0	0	0	0	0	0	0	0	0	0	0	0	0	0	0	0	0	0	0
AC022784.7	ENSG00000254340	0	1	1	0	0	3	0	0	0	0	1	0	1	2	1	0	1	1	2	1	1	0	1	1	0	0	1	2	0	0	1	0	0	0	0	0
AC022784.8	ENSG00000279949	0	0	1	0	0	1	0	0	0	0	0	0	0	0	0	1	0	1	0	0	0	1	0	1	0	0	0	0	0	0	0	0	0	0	0	0
AC022809.1	ENSG00000265984	1	1	2	0	1	0	0	0	0	0	0	0	0	1	1	1	0	0	0	0	0	0	1	1	0	0	0	0	0	0	0	0	0	0	0	0
AC022893.1	ENSG00000253636	7	8	6	8	4	4	0	0	0	1	0	4	6	5	9	5	5	6	2	6	2	4	7	4	1	5	4	1	3	6	3	0	1	0	0	0
AC022893.2	ENSG00000260838	0	0	0	0	0	0	0	0	0	0	1	0	0	0	0	0	0	0	0	0	0	0	0	0	0	0	0	0	0	0	0	0	0	0	0	0
AC022915.1	ENSG00000253455	0	0	0	0	0	0	0	0	0	0	0	0	0	0	0	0	0	0	0	0	0	0	0	0	1	1	3	2	1	2	6	0	2	0	0	0
AC022915.2	ENSG00000253608	0	0	1	0	0	0	0	0	0	0	0	0	0	0	0	0	0	0	0	4	0	0	1	0	0	1	0	1	0	0	0	0	0	0	0	1
AC022916.1	ENSG00000266947	2	3	1	0	0	1	0	0	0	0	0	0	0	1	1	1	0	0	1	1	0	0	0	0	0	5	2	1	0	2	1	0	0	0	0	0
AC022916.2	ENSG00000266981	0	0	0	0	0	0	0	0	0	0	0	0	6	2	7	3	0	1	0	0	0	0	0	0	0	0	0	0	0	0	0	0	0	0	0	0
AC022916.4	ENSG00000267782	0	0	0	0	0	0	0	0	0	0	0	0	0	0	1	0	0	0	0	0	0	0	0	0	0	0	1	0	0	0	0	0	0	0	0	0
AC022929.2	ENSG00000274281	0	0	1	0	1	0	0	0	0	0	0	0	1	0	0	0	0	1	0	1	1	2	0	1	0	0	0	0	0	0	1	0	0	0	0	0
AC022960.1	ENSG00000263924	0	0	1	0	0	0	0	0	0	0	0	1	0	0	0	0	0	0	0	1	0	0	0	0	1	1	0	1	0	0	0	0	0	0	0	0
AC022966.1	ENSG00000267601	0	2	1	1	1	0	1	0	0	0	1	1	2	1	1	1	2	1	2	3	1	2	2	2	0	1	1	3	0	1	1	0	1	1	0	0
AC022973.3	ENSG00000254263	0	0	0	0	0	0	0	0	0	1	0	0	1	0	0	0	0	1	0	0	0	0	0	1	0	0	0	0	0	0	0	0	0	0	0	0
AC022973.4	ENSG00000254317	0	0	0	0	1	0	0	0	0	0	0	0	1	0	0	0	1	0	0	1	0	2	0	0	0	0	0	0	0	0	0	0	0	0	0	0
AC023024.1	ENSG00000259172	2	3	2	1	0	3	0	0	0	0	0	0	0	1	3	1	0	1	0	0	0	0	0	1	0	2	1	0	4	0	2	0	2	0	0	0
AC023034.1	ENSG00000259594	2	1	0	0	0	0	0	0	0	0	0	0	7	3	0	1	0	0	0	0	0	0	0	0	0	0	0	0	0	0	0	0	0	0	0	0
AC023034.2	ENSG00000259610	1	0	0	0	0	0	0	0	0	0	0	0	0	0	0	0	0	0	0	0	0	0	0	0	0	0	0	0	0	0	0	0	0	0	0	0
AC023043.1	ENSG00000260552	0	0	3	2	1	0	0	0	1	0	1	0	1	1	0	0	3	1	2	11	4	4	9	4	12	23	6	9	12	14	24	1	4	0	1	0
AC023051.1	ENSG00000234428	0	0	0	0	0	0	0	0	0	0	0	0	0	0	0	0	0	0	0	0	0	0	1	0	0	0	0	0	0	1	0	0	0	0	0	0
AC023055.1	ENSG00000257390	3	1	3	1	0	1	0	0	0	0	0	0	2	1	2	5	1	0	3	4	0	2	3	3	1	2	1	2	2	3	1	0	1	0	0	0
AC023136.1	ENSG00000249419	0	0	0	0	0	0	0	0	0	0	0	0	0	0	0	0	0	0	0	0	0	0	0	0	0	0	0	0	0	0	1	0	0	0	0	0
AC023154.1	ENSG00000248115	0	0	0	0	0	0	0	0	0	0	0	0	1	0	2	1	0	2	0	0	0	0	2	0	0	0	0	0	0	0	0	0	0	0	0	0
AC023157.3	ENSG00000276900	16	5	16	16	10	8	0	1	4	2	4	4	6	10	5	8	5	3	12	17	6	7	14	10	5	8	15	12	5	10	22	0	3	1	0	2
AC023161.1	ENSG00000257400	0	0	0	0	0	0	0	0	0	0	0	0	0	1	0	0	0	0	0	0	0	0	0	0	0	0	0	0	0	1	0	0	0	0	0	0
AC023202.1	ENSG00000253891	0	0	0	0	0	0	0	0	0	0	0	0	0	0	0	0	0	0	0	0	0	0	0	0	0	0	0	0	0	0	0	0	0	0	0	0
AC023300.2	ENSG00000277749	2	1	2	0	1	1	0	0	0	0	0	2	0	1	1	1	0	2	0	0	0	1	1	0	0	1	0	0	0	0	0	0	0	0	0	0
AC023302.1	ENSG00000271983	0	0	0	1	0	0	0	0	0	0	0	0	0	0	1	0	1	0	1	0	0	0	2	1	0	1	0	0	0	3	1	0	0	0	0	0
AC023310.4	ENSG00000278626	0	0	0	0	0	0	0	0	0	0	0	0	0	0	0	0	0	0	0	0	0	0	0	0	0	0	0	0	0	1	0	0	0	0	0	0
AC023355.1	ENSG00000259488	2	1	4	6	3	2	1	1	0	0	0	0	2	3	2	3	7	2	3	0	2	4	2	1	0	2	5	8	2	4	5	0	0	0	0	0
AC023389.1	ENSG00000263657	0	1	2	0	0	2	0	0	0	0	0	0	0	0	2	0	0	0	0	0	0	1	0	0	0	0	2	0	1	0	0	0	0	0	0	0
AC023403.1	ENSG00000253164	0	0	0	0	0	0	0	0	0	0	0	0	1	2	4	2	1	0	0	0	0	0	0	0	0	0	0	0	0	0	0	0	0	0	0	0
AC023442.3	ENSG00000255279	0	0	1	0	0	0	0	0	0	0	0	0	0	0	0	0	0	0	0	0	0	0	0	0	0	0	0	0	0	0	0	0	0	0	0	0
AC023481.1	ENSG00000231401	0	0	3	2	0	0	0	0	0	0	0	0	1	3	3	8	0	3	2	1	1	1	0	1	0	0	0	0	0	1	0	0	1	0	0	0
AC023490.1	ENSG00000277017	0	0	0	0	0	0	0	0	0	0	0	0	0	0	1	0	0	0	0	0	0	0	0	0	0	0	0	0	0	0	0	0	0	0	0	0
AC023490.3	ENSG00000278044	0	0	0	0	0	0	0	0	0	0	0	0	0	2	0	2	0	0	0	0	0	0	0	0	0	0	0	0	0	0	0	0	0	0	0	0
AC023509.1	ENSG00000257379	0	1	1	0	0	0	0	0	0	0	1	0	0	0	0	1	0	0	0	0	0	0	0	0	0	1	0	0	0	0	0	0	0	0	0	0
AC023509.2	ENSG00000257550	0	1	5	2	0	2	0	0	0	0	1	0	2	2	0	3	1	0	0	2	0	1	3	2	0	0	1	1	2	1	1	0	0	0	0	0
AC023509.3	ENSG00000267281	0	0	2	2	2	0	0	0	0	0	0	0	1	1	2	2	0	1	2	3	1	4	0	1	1	1	0	4	0	2	4	0	0	0	0	0
AC023509.4	ENSG00000270175	5	3	17	12	3	6	0	0	1	1	0	3	8	14	20	18	8	2	4	6	3	2	5	5	1	4	9	4	5	6	4	0	0	0	0	1
AC023510.2	ENSG00000276842	0	0	0	0	0	0	0	0	0	0	0	0	0	0	0	0	0	0	0	0	0	0	0	0	0	0	0	0	0	1	0	0	0	0	0	0
AC023590.1	ENSG00000225885	1	0	0	0	1	2	0	0	0	1	0	3	1	3	3	0	4	0	2	5	0	4	6	4	0	3	1	1	0	2	5	0	1	0	0	0
AC023632.2	ENSG00000253704	2	1	4	3	2	1	0	0	0	0	1	0	2	2	3	3	6	4	1	4	1	4	1	2	2	0	0	1	2	5	3	0	0	0	0	0
AC023632.5	ENSG00000254315	0	0	0	0	0	0	0	0	0	0	0	0	0	0	0	0	0	1	0	0	0	0	0	0	0	0	0	0	0	0	0	0	0	0	0	0
AC023762.1	ENSG00000271148	0	0	0	0	0	1	0	0	0	0	0	0	0	0	0	0	0	0	0	0	0	0	0	0	0	0	0	0	0	0	0	0	0	0	0	0
AC023790.2	ENSG00000255621	1	0	0	0	0	1	0	0	0	0	0	1	4	2	0	0	0	1	0	1	0	0	0	1	0	0	0	0	0	0	0	0	0	0	0	0
AC023794.1	ENSG00000248265	2	2	0	0	0	1	0	0	0	0	0	0	0	0	0	0	0	0	0	0	0	0	0	0	0	0	0	0	0	0	0	0	0	0	0	0
AC023794.2	ENSG00000248576	0	0	0	0	0	1	0	0	0	0	0	0	0	0	0	0	0	0	0	0	0	0	0	0	0	0	0	0	0	0	0	0	0	0	0	0
AC023794.3	ENSG00000249388	5	1	2	0	0	1	0	0	0	0	0	0	0	0	0	0	0	0	1	0	0	0	0	0	0	0	0	0	0	1	1	0	0	0	0	0
AC023794.4	ENSG00000250432	0	3	0	0	0	2	0	0	0	0	0	0	0	0	0	0	2	1	0	0	0	0	0	0	0	2	0	0	1	0	2	0	2	0	0	0
AC023794.6	ENSG00000257534	2	0	0	0	0	0	0	0	0	0	0	0	0	0	0	0	0	0	0	1	0	0	0	0	0	1	0	0	0	0	0	0	0	0	0	0
AC023794.7	ENSG00000260470	2	1	1	0	0	0	0	0	0	0	0	0	0	3	0	1	0	0	2	1	0	0	1	0	1	2	1	1	0	0	0	0	0	0	0	0
AC023796.1	ENSG00000255745	0	0	0	1	0	0	0	0	0	0	0	0	0	0	0	0	0	0	0	0	0	0	0	0	0	0	0	0	0	0	0	0	0	0	0	0
AC023813.3	ENSG00000260052	0	1	2	0	0	0	0	0	0	0	1	0	0	0	0	0	0	0	0	0	0	0	0	0	0	1	1	1	1	0	1	0	0	0	0	0
AC023830.2	ENSG00000261789	0	1	0	0	0	0	0	0	0	0	0	0	0	0	0	0	0	0	0	0	0	0	0	1	0	0	0	0	0	0	0	0	0	0	0	0
AC023855.1	ENSG00000267638	1	0	0	0	1	0	0	0	0	0	0	0	0	0	0	0	0	0	0	0	0	0	1	0	0	0	0	0	0	1	0	0	0	0	0	0
AC023886.1	ENSG00000249509	0	0	0	2	0	0	0	0	0	0	0	0	0	0	0	0	0	0	0	0	0	0	0	0	0	0	0	0	0	0	0	0	0	0	0	0
AC023905.1	ENSG00000259221	0	0	3	0	0	0	0	0	0	0	0	0	0	0	0	0	0	0	0	0	0	0	0	0	0	0	0	0	0	0	0	0	0	0	0	0
AC023906.2	ENSG00000259178	0	1	1	0	0	0	0	0	0	0	0	0	0	0	0	0	0	0	0	0	0	0	0	0	0	1	0	0	0	0	0	0	0	0	0	0
AC023906.3	ENSG00000259327	0	0	0	1	0	0	0	0	0	0	0	0	0	0	0	0	0	0	0	1	0	0	0	0	0	0	0	0	0	0	0	0	0	0	0	0
AC023906.4	ENSG00000259709	0	0	0	0	0	0	0	0	0	0	0	0	0	0	0	0	0	0	0	0	1	0	1	0	0	0	0	0	0	0	0	0	0	0	0	0
AC023906.5	ENSG00000259712	2	1	4	0	0	1	0	0	0	1	0	0	2	1	3	5	0	2	0	1	0	1	0	1	0	2	1	0	1	2	0	0	0	0	0	0
AC023908.3	ENSG00000261136	7	4	9	3	3	5	0	0	0	0	1	2	3	7	9	6	8	1	2	4	0	5	3	3	1	4	2	2	2	5	7	0	3	0	0	1
AC023946.1	ENSG00000255351	0	0	0	0	0	0	0	0	0	0	0	0	1	0	0	1	0	0	0	0	0	0	1	1	1	0	1	0	0	0	1	0	0	0	0	0
AC023983.1	ENSG00000264365	0	1	0	0	0	1	0	0	0	0	0	0	2	1	0	1	1	1	0	0	0	0	0	0	0	0	0	0	0	0	0	0	0	0	0	1
AC023983.2	ENSG00000273321	1	0	0	1	0	1	0	0	0	0	0	0	0	1	1	0	0	0	0	0	0	0	1	0	0	0	0	1	0	0	1	0	0	0	0	0
AC024060.1	ENSG00000271870	17	14	26	32	22	18	2	0	2	0	3	4	18	22	20	13	8	5	16	25	3	13	19	17	9	21	11	13	11	9	20	2	7	1	1	2
AC024075.3	ENSG00000269427	0	0	1	1	0	0	0	0	0	0	0	0	0	0	1	0	0	0	0	0	0	0	0	0	0	0	1	0	0	0	0	0	0	0	0	0
AC024132.1	ENSG00000205830	0	0	0	0	0	0	0	0	0	0	0	0	0	0	0	0	0	0	0	0	0	0	0	0	0	0	0	0	0	0	2	0	0	0	0	0
AC024132.3	ENSG00000251325	0	0	0	0	0	0	0	0	0	0	0	0	0	0	0	0	0	0	0	0	0	0	0	0	0	0	0	1	0	0	0	0	0	0	0	0
AC024230.1	ENSG00000248515	0	0	0	0	0	0	0	0	0	0	0	0	0	0	0	0	0	0	0	0	0	0	0	0	0	0	0	0	0	0	6	1	1	0	0	0
AC024243.1	ENSG00000272969	0	0	1	3	1	1	0	0	2	0	0	0	4	2	2	2	0	0	0	2	0	1	1	1	0	2	2	4	1	2	4	0	2	0	0	2
AC024257.3	ENSG00000269514	1	0	6	1	1	3	0	0	0	1	1	0	2	1	1	1	1	1	0	0	1	0	0	0	1	0	1	1	0	1	1	1	1	0	0	0
AC024257.4	ENSG00000273765	1	0	0	1	0	0	0	0	0	0	0	0	0	1	0	0	0	0	0	0	0	0	0	0	0	1	1	0	0	1	2	0	0	0	0	0
AC024257.5	ENSG00000275228	0	0	0	0	1	0	0	0	0	0	0	0	0	0	0	0	0	0	0	1	0	0	0	0	0	0	0	0	0	0	0	0	0	0	0	0
AC024267.1	ENSG00000264066	0	0	0	0	0	0	0	0	0	0	0	0	0	0	0	0	0	0	0	0	0	2	0	0	0	0	0	0	0	0	0	0	0	0	0	0
AC024267.3	ENSG00000264304	0	0	0	0	0	0	0	0	0	0	0	0	0	0	0	0	0	0	0	0	0	0	1	0	0	0	0	0	0	0	0	0	0	0	0	0
AC024267.4	ENSG00000265845	0	0	1	0	1	0	0	0	0	0	0	0	0	0	0	0	0	0	0	0	0	1	0	0	1	0	0	0	0	0	0	0	0	0	0	0
AC024267.5	ENSG00000265908	0	0	0	0	0	0	0	0	0	0	0	1	0	0	0	0	0	0	0	1	0	0	0	0	0	0	0	1	0	0	0	0	0	0	0	0
AC024267.6	ENSG00000266642	0	0	0	0	0	1	0	0	0	0	0	0	1	0	0	0	0	0	0	0	0	1	0	0	1	0	0	0	0	0	0	0	0	0	0	0
AC024270.3	ENSG00000260579	0	0	0	1	0	0	0	0	0	0	0	0	0	0	0	0	0	0	0	0	0	0	0	0	0	0	0	0	0	0	0	0	0	0	0	0
AC024270.4	ENSG00000260608	0	0	1	0	0	0	0	0	0	0	0	0	0	0	0	0	0	0	0	0	0	1	0	0	0	0	0	0	0	0	0	0	0	0	0	0
AC024337.1	ENSG00000259702	1	0	0	0	0	2	0	0	0	0	0	0	0	1	1	0	1	0	0	0	0	0	0	0	0	0	0	0	0	0	1	0	0	0	0	0
AC024337.2	ENSG00000273771	1	0	0	0	0	0	0	0	0	0	1	1	3	3	0	2	2	1	1	1	0	1	1	0	1	0	0	0	0	0	0	0	0	0	0	0
AC024361.2	ENSG00000263063	0	0	1	0	1	0	0	0	0	0	0	0	2	1	4	2	2	2	2	1	0	1	0	0	0	1	0	1	1	0	3	0	0	0	0	0
AC024475.1	ENSG00000254653	0	0	0	0	0	1	0	0	0	0	0	0	0	0	0	0	0	0	1	0	0	0	0	0	0	0	0	0	0	0	0	0	1	0	0	0
AC024475.4	ENSG00000255314	0	0	1	0	0	0	0	0	0	0	0	0	0	0	0	0	0	0	0	0	0	0	0	0	0	0	0	0	0	0	0	0	0	0	0	0
AC024560.1	ENSG00000236833	0	0	0	0	0	0	0	0	0	0	0	0	0	1	0	0	0	0	0	0	0	0	0	0	0	0	1	0	0	0	0	0	0	0	0	0
AC024560.3	ENSG00000273308	1	2	3	2	2	1	0	0	0	0	0	0	2	0	5	5	1	1	1	2	0	2	2	0	1	3	0	1	3	3	3	0	0	0	0	0
AC024575.1	ENSG00000267277	1	0	0	0	1	0	0	0	0	0	0	0	0	1	1	2	0	1	0	1	0	0	0	0	0	0	0	0	2	0	0	0	1	0	0	0
AC024581.1	ENSG00000249894	0	2	0	0	0	0	0	1	0	0	0	0	0	1	0	0	0	0	0	0	0	0	0	0	0	0	0	0	0	0	0	0	0	0	0	0
AC024587.2	ENSG00000249959	0	0	0	0	0	0	0	0	0	0	0	0	0	0	0	0	0	1	0	0	0	0	0	0	0	0	0	0	0	0	0	0	0	0	0	0
AC024592.1	ENSG00000266941	0	0	0	0	0	0	0	0	0	0	0	1	0	0	0	0	0	0	0	0	0	0	0	0	0	0	0	0	0	0	0	0	0	0	0	0
AC024592.2	ENSG00000267709	0	0	0	0	0	0	0	0	0	0	0	0	0	0	0	0	0	0	0	0	0	0	0	0	0	1	0	0	0	0	1	0	0	0	0	0
AC024592.3	ENSG00000267740	0	0	1	0	1	1	0	0	0	0	0	0	0	1	0	0	0	0	0	3	0	1	0	0	1	0	0	0	0	0	0	0	0	0	0	0
AC024597.1	ENSG00000234756	0	0	0	0	0	0	0	0	0	0	0	0	0	0	0	0	0	0	0	0	0	0	0	0	0	1	0	0	0	2	0	0	0	0	0	0
AC024600.1	ENSG00000224714	0	0	0	1	0	0	0	0	0	0	0	0	0	0	0	0	0	0	0	0	1	0	0	0	0	0	1	0	0	0	0	0	0	0	0	0
AC024601.1	ENSG00000224222	0	0	0	0	0	0	0	0	0	0	0	0	0	0	1	0	0	0	0	0	0	0	1	0	0	0	0	0	0	0	0	0	0	0	0	0
AC024610.2	ENSG00000279668	0	1	0	0	0	0	0	0	0	0	0	0	0	0	0	0	0	0	0	0	0	0	0	0	0	0	0	0	0	0	0	0	0	0	0	0
AC024614.1	ENSG00000264643	0	0	0	0	0	0	0	0	0	0	0	0	0	0	0	0	0	0	0	1	0	0	0	0	0	0	0	0	0	0	0	0	0	0	0	0
AC024651.1	ENSG00000259478	0	0	1	1	0	1	0	0	0	0	0	0	0	0	2	0	0	0	0	0	0	0	0	0	0	0	0	0	0	0	0	0	0	0	0	0
AC024884.2	ENSG00000276272	2	0	3	2	0	1	0	0	0	0	0	0	0	1	1	1	1	0	3	2	1	3	2	2	0	0	4	1	0	2	0	0	0	0	0	0
AC024896.1	ENSG00000247903	0	0	0	0	1	0	0	0	0	0	0	0	0	0	2	0	1	0	0	0	0	1	0	1	0	1	0	0	0	0	1	0	0	0	0	0
AC024901.1	ENSG00000255910	0	0	0	0	0	0	0	0	0	0	0	0	0	0	0	0	1	0	0	0	0	0	0	0	0	0	0	0	0	0	0	0	0	0	0	0
AC024908.1	ENSG00000234170	0	0	0	0	0	0	0	0	0	0	0	0	0	0	1	1	0	0	0	0	0	0	0	0	0	0	0	0	0	0	0	0	0	0	0	0
AC024909.2	ENSG00000274021	4	4	9	3	7	4	0	1	1	0	1	1	1	4	3	4	4	1	1	0	3	2	2	3	0	0	0	0	2	2	2	0	0	0	0	0
AC024933.1	ENSG00000272656	0	1	2	0	1	1	0	0	0	0	0	0	0	0	4	0	3	0	0	3	2	3	0	3	0	3	3	4	3	3	0	0	0	0	0	0
AC024940.1	ENSG00000177340	12	13	16	5	0	8	0	0	0	0	0	0	1	1	7	3	1	3	1	2	3	1	2	0	0	0	0	2	1	0	1	0	0	0	0	0
AC024941.1	ENSG00000278011	0	0	0	0	0	0	0	0	0	0	0	0	0	0	0	0	0	0	0	0	0	0	1	0	0	0	1	0	0	0	0	0	1	0	0	0
AC024941.2	ENSG00000281333	0	0	0	0	1	1	0	0	0	0	0	0	0	0	0	0	0	0	0	0	1	0	0	0	1	0	0	0	0	0	0	0	0	0	0	0
AC024958.1	ENSG00000253643	0	0	0	0	0	1	0	0	0	0	0	0	0	0	0	0	0	0	0	0	0	0	0	0	0	0	0	0	0	0	0	0	0	0	0	0
AC025031.1	ENSG00000257496	0	0	0	1	0	0	1	0	0	0	0	1	2	0	5	3	5	1	0	1	0	0	1	0	0	0	0	0	0	0	0	0	0	0	0	0
AC025031.2	ENSG00000258096	1	1	0	0	0	1	0	0	0	0	0	0	0	1	1	0	0	0	0	0	0	0	0	1	0	0	0	0	0	1	1	0	1	0	0	0
AC025031.4	ENSG00000275481	8	2	3	7	2	4	0	2	2	1	2	4	3	6	10	9	1	7	2	5	7	6	4	8	2	1	3	4	5	4	2	0	2	0	0	0
AC025034.1	ENSG00000258302	1	0	1	0	0	0	0	0	1	0	0	0	3	3	3	2	1	1	3	1	0	4	0	0	1	1	0	3	4	3	3	0	0	0	0	1
AC025035.1	ENSG00000258100	1	0	0	0	0	0	0	0	0	0	0	0	0	0	0	1	0	0	0	0	0	0	0	0	0	0	0	0	2	0	0	0	1	0	0	0
AC025040.1	ENSG00000259188	0	0	0	0	0	0	0	0	0	0	0	0	0	0	0	0	1	0	0	0	0	0	0	0	1	0	0	0	0	0	0	0	0	0	0	0
AC025043.1	ENSG00000259595	0	0	0	0	0	0	0	0	0	0	0	0	0	0	0	0	0	0	1	1	0	0	0	0	0	0	0	0	0	0	0	0	0	0	0	0
AC025048.2	ENSG00000267248	11	9	15	7	8	9	0	0	0	0	3	3	4	3	2	0	3	1	8	13	3	10	11	15	5	9	8	12	3	8	13	1	4	2	0	1
AC025048.4	ENSG00000267416	5	2	4	1	6	1	0	0	0	0	1	1	1	3	3	1	2	0	1	6	1	2	4	2	2	6	9	2	4	1	9	0	1	0	0	1
AC025154.2	ENSG00000257588	0	0	0	0	0	0	0	0	0	0	0	1	0	2	0	0	1	1	0	0	0	1	0	0	0	0	0	0	0	0	0	0	0	0	0	0
AC025159.1	ENSG00000257815	40	56	106	63	25	48	3	4	13	9	13	15	46	55	90	88	34	24	25	67	19	56	48	52	23	68	76	61	42	76	81	4	34	5	4	8
AC025162.1	ENSG00000258554	1	1	0	0	0	0	0	0	0	0	0	0	0	0	0	0	0	0	1	0	0	0	0	0	0	0	0	0	0	0	0	0	0	0	0	0
AC025164.1	ENSG00000245904	11	10	18	11	3	14	0	3	2	3	5	8	52	51	97	60	46	36	5	9	5	7	3	10	5	5	7	11	15	10	6	0	2	0	0	1
AC025165.2	ENSG00000257342	0	1	0	0	1	1	0	0	0	0	0	0	0	1	0	0	0	0	1	1	1	0	2	0	0	0	0	1	0	0	0	0	0	0	0	0
AC025165.3	ENSG00000257921	0	1	0	0	0	0	0	0	0	0	0	0	0	0	0	0	0	0	0	1	0	0	0	0	0	0	0	0	0	0	0	0	0	0	0	0
AC025165.4	ENSG00000269903	1	1	3	1	3	1	1	0	0	0	1	0	1	1	3	2	0	1	1	3	2	0	0	4	0	1	0	1	0	1	0	1	0	0	0	0
AC025165.5	ENSG00000270039	2	3	6	2	4	5	1	0	0	1	2	0	13	16	15	16	5	6	2	2	3	3	0	5	1	4	1	3	1	1	1	0	1	0	0	0
AC025166.1	ENSG00000274798	0	0	0	0	0	0	0	0	0	0	0	0	0	0	0	0	0	0	0	1	0	0	0	1	0	0	0	0	0	0	0	0	0	0	0	0
AC025171.2	ENSG00000215068	9	15	9	7	5	7	2	1	3	0	2	3	3	8	4	4	4	3	4	20	4	7	10	5	3	7	2	3	4	9	14	1	1	1	0	0
AC025171.3	ENSG00000251131	3	6	6	4	2	4	0	0	0	0	0	2	0	2	4	3	1	2	9	6	5	7	5	8	3	2	3	4	3	4	5	0	3	0	0	1
AC025171.4	ENSG00000272144	2	3	1	1	1	1	0	0	0	0	2	2	2	0	3	1	4	1	3	2	3	5	3	3	0	3	7	0	2	2	3	0	1	0	0	0
AC025171.5	ENSG00000272382	10	12	22	9	11	13	0	0	0	1	0	9	6	5	7	7	10	6	5	12	0	4	3	8	0	0	1	0	0	0	0	0	0	0	0	0
AC025175.1	ENSG00000272416	1	1	0	1	1	0	0	0	1	0	0	0	0	0	2	0	0	0	0	0	0	0	0	0	0	0	0	0	0	1	0	0	0	0	0	0
AC025176.1	ENSG00000250081	0	3	4	3	5	4	0	0	0	0	0	1	0	0	0	0	2	1	0	1	1	1	3	3	3	1	0	0	2	2	3	0	0	0	1	1
AC025178.1	ENSG00000250764	1	0	1	0	0	0	0	0	0	0	0	0	1	0	0	1	0	0	0	0	0	0	0	0	0	1	0	0	0	0	0	0	0	0	0	0
AC025180.1	ENSG00000249899	0	0	0	0	0	0	0	0	0	0	0	0	0	0	0	0	0	0	0	0	0	1	0	0	0	0	0	0	0	0	0	0	0	0	0	0
AC025181.2	ENSG00000272086	20	22	27	21	19	15	0	0	5	2	6	11	10	17	35	26	9	8	9	25	6	28	17	10	10	30	33	30	20	26	39	2	5	0	0	1
AC025188.1	ENSG00000225407	0	0	0	0	0	0	0	0	0	0	1	0	0	0	0	0	0	0	1	0	0	1	0	2	0	0	0	0	0	0	0	0	0	0	0	0
AC025211.1	ENSG00000264458	0	0	0	0	0	0	0	0	0	0	0	0	0	1	0	2	0	0	0	0	0	0	0	0	0	0	0	0	0	0	0	0	0	0	0	0
AC025219.1	ENSG00000259445	1	1	0	0	0	0	0	0	0	0	0	0	2	1	0	0	0	0	0	0	0	0	0	0	0	0	0	0	1	0	0	0	0	0	0	0
AC025244.1	ENSG00000251185	0	1	0	0	1	0	0	0	0	0	0	0	0	0	0	0	0	0	0	0	0	0	0	0	0	0	0	0	2	0	0	0	0	0	0	0
AC025252.1	ENSG00000255945	0	0	0	0	0	0	0	0	0	0	0	0	0	0	0	0	0	0	0	0	0	0	0	0	0	1	0	0	0	0	0	0	0	0	0	0
AC025257.1	ENSG00000257386	1	0	0	0	0	2	0	0	0	1	0	0	3	2	2	1	0	1	0	3	0	0	1	0	0	1	0	1	1	1	1	0	0	0	0	0
AC025259.1	ENSG00000257663	0	0	0	0	0	0	0	0	0	0	0	0	0	0	1	0	0	0	0	1	0	0	0	2	0	0	0	0	0	0	0	0	0	0	0	0
AC025259.3	ENSG00000259884	1	0	0	0	0	0	0	0	0	0	0	0	0	0	1	0	0	0	0	1	0	2	0	0	0	1	0	1	1	0	0	0	0	0	0	0
AC025262.1	ENSG00000215159	0	1	0	0	0	2	0	0	0	0	0	0	0	1	0	0	0	0	0	0	0	0	0	1	0	0	0	0	0	0	0	0	0	0	0	0
AC025263.1	ENSG00000247131	0	0	1	0	0	0	0	0	0	0	0	0	0	0	0	0	0	0	0	0	0	0	0	0	0	0	0	0	0	0	0	0	0	0	0	0
AC025265.1	ENSG00000257681	3	4	1	1	1	2	0	0	0	0	0	2	3	0	2	1	1	0	2	2	0	1	1	2	0	1	0	1	1	1	1	0	0	1	0	0
AC025265.2	ENSG00000257737	0	0	0	0	0	0	0	0	0	0	0	0	0	1	1	1	0	0	0	0	0	0	0	0	0	0	0	0	0	0	0	0	0	0	0	0
AC025271.4	ENSG00000276772	0	0	1	0	0	0	0	0	0	0	0	0	0	0	3	1	2	0	0	1	0	0	0	0	0	0	0	0	0	0	0	0	0	0	0	0
AC025279.1	ENSG00000198106	1	0	0	1	4	3	0	0	1	1	0	1	6	0	5	8	1	1	1	3	0	3	0	1	2	2	6	7	4	1	9	1	4	0	1	1
AC025283.2	ENSG00000262621	1	1	2	1	0	0	0	0	0	0	0	0	1	3	0	1	0	2	1	0	1	1	0	1	4	13	8	4	15	11	11	0	1	0	0	0
[truncated: 24,019 more rows]
