# Supplementary material for: iMyoblasts for ex vivo and in vivo investigations of human myogenesis and disease modeling
Source: eLife. 2022 Jan 25;11:e70341. doi: 10.7554/eLife.70341 (PMC8789283; doi:10.7554/eLife.70341)
Supplement: Supplementary file 4. — Table lists all primers for qPCR and bisulfite sequencing. [file elife-70341-supp4.xlsx]

## Sheet: qPCR primers
	Gene name	NCBI Gene ID	Sequence (5'-3')	Reference
	RPL13A	23521	For: AACCTCCTCCTTTTCCAAGC	(Geng et al., 2012)
			Rev: GCAGTACCTGTTTAGCCACGA
	CKM	1158	For: ATGCCATTCGGTAACACCCAC
			Rev: GCTTCTTGTAGAGTTCAAGGGTC
	MYH8	4626	For: AATGCAAGTGCTATTCCAGAGG
			Rev: ACAGACAGCTTGTGTTCTTGTT
	MYOG	4656	For: GGGGAAAACTACCTGCCTGTC
			Rev: AGGCGCTCGATGTACTGGAT
	MYOD1	4654	For: GCGGAACTGCTACGAAGG	(Lapan et al., 2012)
			Rev: AGGGCTCTCGGTGGAGAT
	PAX3	5077	For: CACCTTCACAGCAGAACAGC	(Lapan et al., 2012)
			Rev: CAGCTTGCTTCCTCCATCTT
	PAX7	5081	For: GGGAAGAAAGAGGAGGAGGA	(Lapan et al., 2012)
			Rev: TTCAGTGGGAGGTCAGGTTC
	MYF5	4617	For: CCACCTCCAACTGCTCTGAT	(Lapan et al., 2012)
			Rev: TGATCCGGTCCACTATGTTG
	MBD3L2	125997	For: GCGTTCACCTCTTTTCCAAG	(Geng et al., 2012)
			Rev: GCCATGTGGATTTCTCGTTT
	TRIM43	129868	For: ACCCATCACTGGACTGGTGT	(Geng et al., 2012)
			Rev: CACATCCTCAAAGAGCCTGA
	ZSCAN4	201516	For: TGGAAATCAAGTGGCAAAAA	(Geng et al., 2012)
			Rev: CTGCATGTGGACGTGGAC
	LEUTX	342900	For: 5'-TGGCTACAATGGGGAAACTG-3'	(Lim et al., 2015)
			Rev: 5'-CTGCTGCCTCTTCCATTTG-3'
	DUX4	100288687	For: GGCCCGGTGAGAGACTCCACA	(Rickard et al., 2015)
			Rev: CCAGGAGATGTAACTCTAATCCAGGTTTGC

## Sheet: bisulfite sequencing primers
	Locus	Sequence (5’-3’)	Reference
	MYOD1 Core enhancer	For: AGTTGGGGGTATTTATGGGTTTTTTTATAAATTTTTG
		Rev: CCCCAAACCTCAAAACTCAATTAAAAAAACC
	DUX4 4qA	1438F: GTTTTGTTGGAGGAGTTT TAGGA	(Jones et al., 2014)
		3742R: AACATTCAACCAAAATTT CACRAAA
		3656R: AACAAAAATATACTTTTAACCRCCAAAAA
